# Supplementary material for: Identification of CircRNA-Associated ceRNA Networks Using Longissimus Thoracis of Pigs of Different Breeds and Growth Stages
Source: Research Square preprint supplement (doi:10.21203/rs.3.rs-852221/v1), 2021-11-30
Supplement: Supplementary file 1 [file 1fb82407cefe2f845c067c28.xlsx]

## Sheet: A
Filtering statistics of raw reads in each libraries
Type	LT1D_1	LT1D_2	LT1D_3	LT90D_1	LT90D_2	LT90D_3	LW1D_1	LW1D_2	LW1D_3	LW90D_1	LW90D_2	LW90D_3
Total Raw Reads	20451568	25543730	21580409	25555905	14482365	15736567	20626355	12187124	24538771	25275548	23538933	23192179
Total Clean Reads	12709656	24317167	20281346	16550520	13521932	14813984	19461585	11532044	23025617	23593175	22290602	22035916
Total Clean Reads Ratio(%)	62.15	95.2	93.98	64.76	93.37	94.14	94.35	94.62	93.83	93.34	94.7	95.01
Total Short Valid Length Reads	201375	264762	219833	362270	123070	159896	285353	132954	553969	266908	273670	284045
Total Short Valid Length Reads Ratio(%)	0.98	1.04	1.02	1.42	0.85	1.02	1.38	1.09	2.26	1.06	1.16	1.22
Total Invalid Adapter Reads	7178605	571942	743772	7299081	454415	304086	242834	174507	240846	1009748	621453	510253
Total Invalid Adapter Reads Ratio(%)	35.1	2.24	3.45	28.56	3.14	1.93	1.18	1.43	0.98	3.99	2.64	2.2

## Sheet: B
Distribution of the clean reads in each small RNA librarie
Type	LT1D_1		LT1D_2		LT1D_3		LT90D_1		LT90D_2		LT90D_3		LW1D_1		LW1D_2		LW1D_3		LW90D_1		LW90D_2		LW90D_3
	Unique	Total	Unique	Total	Unique	Total	Unique	Total	Unique	Total	Unique	Total	Unique	Total	Unique	Total	Unique	Total	Unique	Total	Unique	Total	Unique	Total
SINE/tRNA	2199	5429	3374	11519	3387	9833	17485	31355	3038	7175	7572	15734	17862	34720	8694	15787	29273	57097	4151	9520	4967	10543	4506	10499
SINE/tRNA-Deu	1	1	0	0	0	0	4	4	2	2	0	0	5	6	2	3	8	8	0	0	4	7	1	2
SINE/tRNA-RTE	6	14	10	25	12	22	42	56	14	18	27	33	30	37	13	15	66	87	6	27	20	32	19	45
exon_antisense	11479	7751285	16338	12875452	14537	12082647	81314	6911085	20699	7284217	43381	8212987	43057	8401370	29859	5339182	84077	9013563	16661	13335160	21990	12662540	20526	12314587
exon_sense	219	2030	663	34514	594	30790	812	55107	474	33502	534	10734	567	4693	503	10593	1488	236607	310	2202	573	61762	593	43705
intron_antisense	1561	12588	2672	23696	2466	23245	9991	17889	2449	8510	5593	12260	10560	24408	5333	14571	18128	35632	2826	20345	3002	14377	2977	18629
intron_sense	499	1033	1223	2469	774	1397	2921	4917	946	1403	2113	3262	2249	3608	1126	1669	3828	5835	928	1729	1128	2052	1001	1858
miRNA	9322	1799999	13710	4606669	12226	3385590	10420	1684171	9734	2100806	10552	2474233	13032	3133385	10094	1778680	13194	2645208	11675	3673891	11958	3513136	11645	3662604
rRNA	14267	99211	24395	198842	27115	177767	222472	3137824	35276	256199	49624	400112	159293	2031948	122509	1186622	289707	4843101	32789	233578	55848	434447	39116	343664
rRNAetc	5647	1282345	8134	2800831	6938	1633234	43086	1398099	9057	1049616	13094	1285267	33165	1935950	24667	1159227	58266	2156678	8572	2503953	9519	2063523	9906	2319254
repeat	11178	597103	17251	1074156	15449	868118	60255	1073059	15203	761912	35664	781198	58104	809757	27222	539914	91741	998331	20250	1384423	24112	1280333	20615	1128173
scRNA	556	4177	908	11167	777	9598	2142	31118	1671	75200	1351	20910	1326	12400	1075	8005	2099	21406	1119	21352	893	10800	1490	31098
snRNA	2929	6542	4876	13727	4540	12431	21394	78863	4528	9862	10771	22580	19120	70230	11315	37847	32437	132689	5968	14013	7626	16031	6239	14078
snoRNA	4927	30539	8071	63939	7192	47835	26023	124980	10134	89016	14146	58467	23268	119839	14427	73878	39394	213886	9077	78079	9745	53889	10301	104276
srpRNA	134	232	217	594	187	496	3857	24394	291	709	444	955	1840	7830	1473	5528	4111	28889	250	914	387	1202	252	749
tRNA	5531	16780	9425	38470	11032	35883	26282	162959	14865	198167	11901	55325	17375	84295	13382	64007	30943	203136	14264	60837	23284	82254	15964	81865
Unannotation	105726	1100348	160567	2561097	153807	1962460	408179	1814640	139837	1645618	223308	1459927	265298	2787109	166996	1296516	455686	2433464	170890	2253152	237140	2083674	188950	1960830

## Sheet: C
The expression levels of known miRNAs identified in this study
miRNA	Counts												TPM												LT1D VS LW1D			LT1D VS LT90D			LW1D VS LW90D			LT90D VS LW90D
	LT1D_1	LT1D_2	LT1D_3	LT90D_1	LT90D_2	LT90D_3	LW1D_1	LW1D_2	LW1D_3	LW90D_1	LW90D_2	LW90D_3	LT1D_1	LT1D_2	LT1D_3	LT90D_1	LT90D_2	LT90D_3	LW1D_1	LW1D_2	LW1D_3	LW90D_1	LW90D_2	LW90D_3	logFC	PValue	FDR	logFC	PValue	FDR	logFC	PValue	FDR	logFC	PValue	FDR
ssc-let-7a	865588	1905801	1093813	649795	734010	838762	1059929	632709	913584	1880143	1373009	1403980	68104.8	78372.7	53932	49120.3	52151.7	52347.6	54462.6	54865.3	39676.9	69553.5	55472	56968.3	-0.106333	0.582569	1	-0.267631	0.166783	0.40423	0.0832292	0.667035	0.929892	0.244527	0.20645	0.849025
ssc-let-7c	634488	1345333	875839	469097	712767	694372	728898	440218	577434	1673599	1147151	1139090	49921.7	55324.4	43184.5	35460.7	50642.4	43336.1	37453.2	38173.5	25077.9	61912.7	46346.9	46220	-0.246411	0.25684	0.89894	-0.0832403	0.701554	0.999183	0.418313	0.0545078	0.142326	0.255142	0.240369	0.858837
ssc-let-7d-3p	1423	3172	3491	1781	4538	4727	2497	2068	3837	4048	4268	3739	111.962	130.443	172.129	134.632	322.427	295.015	128.304	179.326	166.64	149.751	172.435	151.715	0.532437	0.111245	0.563069	0.965422	0.00382844	0.0165731	-0.232911	0.488259	0.787438	-0.665868	0.0447742	0.417631
ssc-let-7d-5p	20985	56647	48170	18633	17474	25738	31631	20130	33113	53427	37746	35138	1651.11	2329.51	2375.09	1408.53	1241.53	1606.32	1625.3	1745.57	1438.09	1976.46	1525.01	1425.77	-0.0757656	0.73892	1	-0.468442	0.0391163	0.122564	-0.181542	0.423773	0.741603	0.211132	0.352603	1
ssc-let-7e	384216	882994	497932	293237	359223	395562	434841	265977	353904	1080606	692844	695552	30230.2	36311.5	24551.2	22166.8	25522.9	24687.2	22343.6	23064.2	15370	39975.7	27992.1	28222.9	-0.26732	0.224145	0.801563	-0.215633	0.326691	0.624892	0.462052	0.0358855	0.0992129	0.410364	0.062265	0.499639
ssc-let-7f	755677	1667395	928035	592390	617794	744781	927531	556878	828206	1544170	1179035	1225777	59456.9	68568.6	45758.1	44780.8	43894.5	46482.2	47659.6	48289.6	35968.9	57124.6	47635.1	49737.5	-0.0737189	0.699833	1	-0.246289	0.197921	0.452494	0.0203678	0.91519	1	0.192938	0.313066	0.980941
ssc-let-7g	110104	223882	124546	113621	79245	104953	162612	94811	183287	150832	182029	174112	8663.02	9206.75	6140.91	8589.01	5630.39	6550.17	8355.54	8221.53	7960.13	5579.84	7354.29	7064.82	0.373928	0.117344	0.576213	-0.09283	0.697313	0.997461	-0.521304	0.0292505	0.085163	-0.0545461	0.819333	1
ssc-let-7i	349546	876529	571233	247436	288128	181226	634098	364079	533144	815705	718275	773499	27502.4	36045.7	28165.4	18704.6	20471.6	11310.4	32582	31571.1	23154.4	30176	29019.6	31385.7	0.248243	0.298717	0.966264	-0.747122	0.00185774	0.00860841	-0.152057	0.524291	0.809211	0.843308	0.000452248	0.0171033
ssc-miR-1	1222420	2089312	1546729	3431205	3610720	3940033	1471156	1104620	2285285	5067457	7169433	6403063	96180.4	85919.2	76263.6	259377	256543	245900	75592.8	95787	99249.7	187464	289658	259812	0.419642	0.0829001	0.505077	1.67283	1.52991e-11	5.03341e-10	1.20527	8.66018e-07	1.35676e-05	-0.0479129	0.842776	1
ssc-miR-100	194264	496473	374430	146673	119557	163896	314334	155839	241356	297616	271397	289501	15284.8	20416.6	18461.8	11087.5	8494.57	10228.8	16151.5	13513.6	10482.1	11009.9	10964.9	11746.9	-0.11547	0.565278	1	-0.749561	0.000205161	0.00116376	-0.456256	0.0233727	0.0712001	0.177834	0.376197	1
ssc-miR-101	28555	57433	26385	21177	19188	46497	44415	23681	32063	44166	47548	42732	2246.72	2361.83	1300.95	1600.84	1363.32	2901.9	2282.19	2053.5	1392.49	1633.87	1921.02	1733.91	0.271428	0.376986	1	0.107998	0.725292	1	-0.312872	0.30872	0.580394	-0.149443	0.626803	1
ssc-miR-103	1714	5197	3002	2378	1658	1000	4733	2676	5243	2623	3658	2920	134.858	213.717	148.018	179.761	117.802	62.4105	243.197	232.049	227.703	97.0346	147.79	118.483	0.841737	0.0131534	0.270467	-0.348404	0.312623	0.612221	-1.1768	0.000602047	0.00373724	0.0132848	0.981445	1
ssc-miR-105-1	7	18	32	3	4	9	26	10	23	6	4	12	0.550762	0.740218	1.5778	0.226781	0.284202	0.561695	1.33597	0.867149	0.998887	0.221962	0.161607	0.486915	0.428455	1	1	-1.074	0.632514	0.937572	-1.69146	0.632514	0.908912	-0.217032	1	1
ssc-miR-105-2	0	3	0	1	0	1	3	0	1	0	0	1	0	0.12337	0	0.0755935	0	0.0624105	0.15415	0	0.0434299	0	0	0.0405763	0.297686	1	1	0.0707497	1	1	-0.510659	1	1	-0.303857	1	1
ssc-miR-106a	243	745	601	771	381	314	599	469	894	582	725	451	19.1193	30.6368	29.6331	58.2826	27.0702	19.5969	30.7786	40.6693	38.8263	21.5304	29.2913	18.2999	0.809951	0.0419472	0.385685	0.511514	0.204773	0.459602	-0.89818	0.0267777	0.0786595	-0.599831	0.143175	0.736008
ssc-miR-107	1367	4392	2487	1752	1367	829	3922	2205	4263	2177	3059	2453	107.556	180.613	122.625	132.44	97.1259	51.7383	201.525	191.206	185.142	80.5354	123.589	99.5336	0.831358	0.0106487	0.249954	-0.430191	0.194127	0.449773	-1.1513	0.000486011	0.00319795	0.110176	0.743682	1
ssc-miR-10a-3p	35	67	62	38	46	56	72	29	98	71	95	83	2.75381	2.75526	3.057	2.87255	3.26832	3.49499	3.6996	2.51473	4.25613	2.62656	3.83817	3.36783	0.59553	0.537764	1	0.26999	0.827725	1	-0.297815	0.837573	1	0.0280712	1	1
ssc-miR-10a-5p	332624	730559	467585	461207	507896	501524	611696	349591	560404	658688	698194	780240	26171	30042.9	23054.9	34864.3	36086.2	31300.4	31430.9	30314.7	24338.3	24367.3	28208.3	31659.2	0.444973	0.0169272	0.290597	0.481761	0.00973691	0.0365963	-0.242835	0.191849	0.389618	-0.279623	0.132924	0.716918
ssc-miR-10b	413144	881690	561571	578429	619621	598583	739784	420526	683489	833297	859291	954490	32506.3	36257.9	27689	43725.5	44024.3	37357.9	38012.5	36465.9	29683.9	30826.8	34716.9	38729.7	0.437847	0.0185487	0.290597	0.489834	0.00846514	0.0331551	-0.210812	0.256266	0.501723	-0.2628	0.157078	0.748964
ssc-miR-122	16	43	38	177	302	153	90	43	45	419	204	298	1.25889	1.7683	1.87364	13.3801	21.4572	9.54881	4.62449	3.72874	1.95435	15.5004	8.24196	12.0917	1.31841	0.145134	0.645256	3.19182	5.85184e-07	6.2105e-06	1.55971	0.00678463	0.0259552	-0.305894	0.559738	1
ssc-miR-1249	2	5	4	11	5	18	7	5	15	5	13	9	0.157361	0.205616	0.197226	0.831529	0.355252	1.12339	0.359683	0.433574	0.651448	0.184969	0.525223	0.365187	1.18816	0.505174	1	1.60331	1	1	-0.4911	1	1	-0.888584	1	1
ssc-miR-124a	0	5	0	0	0	0	0	0	0	0	1	0	0	0.205616	0	0	0	0	0	0	0	0	0.0404018	0	-0.578387	1	1	-0.611373	1	1	0.138035	1	1	0.147617	1	1
ssc-miR-125a	42609	132924	84493	22595	32496	53830	59050	31284	37129	49804	61055	60041	3352.49	5466.26	4166.04	1708.04	2308.85	3359.56	3034.18	2712.79	1612.51	1842.44	2466.73	2436.24	-0.515704	0.0774407	0.499568	-0.701496	0.0165507	0.0598371	-0.314804	0.281114	0.544038	-0.129014	0.658652	1
ssc-miR-125b	56549	148887	94517	29865	26880	61378	80084	40104	63925	48111	62907	62060	4449.29	6122.71	4660.29	2257.6	1909.84	3830.63	4114.98	3477.61	2776.26	1779.81	2541.55	2518.16	-0.233447	0.406938	1	-0.814938	0.00400127	0.0170963	-0.807232	0.00438362	0.0182558	-0.225744	0.423406	1
ssc-miR-126-3p	59420	190402	193942	119625	136830	145051	145475	94288	179596	189849	156965	169639	4675.19	7829.94	9562.58	9042.87	9721.83	9052.71	7474.98	8176.17	7799.83	7023.23	6341.66	6883.32	0.422854	0.105116	0.55779	0.440623	0.091313	0.248281	-0.440418	0.0914996	0.214598	-0.458187	0.0791784	0.554249
ssc-miR-126-5p	1125	3322	2894	2022	1467	1676	1936	1367	2847	1416	2351	1462	88.5154	136.611	142.693	152.85	104.231	104.6	99.478	118.539	123.645	52.3831	94.9846	59.3225	0.237841	0.449881	1	0.0852816	0.788733	1	-0.958605	0.00275719	0.0127763	-0.806128	0.0117541	0.18503
ssc-miR-127	129649	194694	190017	54008	31122	9747	202948	84977	219685	60751	60634	41691	10200.8	8006.44	9369.05	4082.65	2211.23	608.315	10428.1	7368.77	9540.9	2247.41	2449.72	1691.67	0.333532	0.480814	1	-1.88905	0.000110121	0.000683584	-2.33408	2.54417e-06	3.34813e-05	-0.111507	0.814016	1
ssc-miR-1271	2	8	4	2	0	0	2	0	7	4	5	5	0.157361	0.328986	0.197226	0.151187	0	0	0.102767	0	0.304009	0.147975	0.202009	0.202881	-0.248133	1	1	-0.956676	1	1	0.12811	1	1	0.81834	1	1
ssc-miR-1277	15	48	59	0	3	13	16	11	29	15	18	9	1.18021	1.97391	2.90908	0	0.213151	0.811337	0.822132	0.953864	1.25947	0.554906	0.727232	0.365187	-0.619438	1	1	-2.10926	0.138187	0.354071	-0.936496	0.632427	0.908912	0.531115	1	1
ssc-miR-128	315622	643011	883918	139899	169497	218381	391843	288600	336617	617204	347187	393302	24833.2	26442.7	43582.8	10575.5	12042.8	13629.3	20134.2	25025.9	14619.2	22832.7	14027	15958.7	-0.36725	0.197874	0.765555	-1.28504	8.99042e-06	8.03241e-05	-0.374635	0.189103	0.386427	0.543152	0.0573207	0.483552
ssc-miR-1285	9	34	36	1553	17	32	373	360	1219	27	45	29	0.708123	1.39819	1.77503	117.397	1.20786	1.99714	19.166	31.2174	52.941	0.998831	1.81808	1.17671	4.98734	0.000145138	0.00955011	4.93279	0.000249167	0.00136626	-4.84613	0.000320283	0.00219528	-4.79141	0.000281966	0.0149627
ssc-miR-1296-5p	69	219	180	36	78	92	64	30	69	159	227	147	5.42894	9.00598	8.87515	2.72137	5.54193	5.74177	3.28853	2.60145	2.99666	5.88201	9.1712	5.96471	-1.03871	0.107998	0.563069	-0.610968	0.390599	0.713929	1.0002	0.14077	0.300735	0.573063	0.37418	1
ssc-miR-129a-3p	0	1	2	1	0	0	4	1	11	3	1	7	0	0.0411232	0.0986128	0.0755935	0	0	0.205533	0.0867149	0.477729	0.110981	0.0404018	0.284034	1.31179	1	1	-0.167699	1	1	-0.628667	1	1	0.846838	1	1
ssc-miR-129a-5p	86	198	154	142	143	321	271	83	158	1123	684	2053	6.76651	8.1424	7.59318	10.7343	10.1602	20.0338	13.9249	7.19734	6.86192	41.544	27.6348	83.3031	0.624059	0.299571	0.966264	0.96258	0.0929667	0.250705	2.22469	1.93982e-06	2.77478e-05	1.88785	2.98638e-05	0.00491259
ssc-miR-129b	86	198	154	142	143	322	269	83	159	1130	689	2065	6.76651	8.1424	7.59318	10.7343	10.1602	20.0962	13.8221	7.19734	6.90535	41.8029	27.8368	83.79	0.621348	0.299412	0.966264	0.964759	0.0800566	0.223209	2.23632	1.71163e-06	2.55966e-05	1.89459	2.68564e-05	0.00491259
ssc-miR-1306-3p	181	373	504	131	181	297	226	138	236	310	207	209	14.2411	15.339	24.8504	9.90275	12.8601	18.5359	11.6126	11.9667	10.2495	11.4681	8.36317	8.48044	-0.361836	0.413856	1	-0.288424	0.493282	0.814941	-0.464793	0.352812	0.644863	-0.53876	0.248465	0.858837
ssc-miR-1306-5p	28	87	72	68	39	40	137	76	155	28	35	51	2.20305	3.57772	3.55006	5.14036	2.77097	2.49642	7.03951	6.59033	6.73163	1.03582	1.41406	2.06939	1.4131	0.0231356	0.33094	0.259176	0.837509	1	-2.28853	0.0016421	0.00839195	-1.13956	0.331994	1
ssc-miR-1307	6216	13507	12412	3772	4580	4352	7590	5242	8341	7892	7128	6495	489.077	555.451	611.991	285.139	325.411	271.611	389.999	454.559	362.249	291.955	287.984	263.543	-0.131532	0.510331	1	-0.799482	6.56058e-05	0.000440496	-0.732577	0.000289802	0.00202861	-0.0646564	0.753556	1
ssc-miR-130a	248	570	528	67	100	99	338	172	336	183	142	116	19.5127	23.4402	26.0338	5.06477	7.10504	6.17864	17.3675	14.915	14.5924	6.76986	5.73705	4.70685	-0.23021	0.580045	1	-1.78039	3.21444e-05	0.000245942	-1.63802	0.000551287	0.00354616	-0.0901928	1	1
ssc-miR-130b	33	91	65	40	25	49	66	36	72	58	64	48	2.59645	3.74221	3.20492	3.02374	1.77626	3.05812	3.3913	3.12174	3.12695	2.14564	2.58571	1.94766	0.3269	0.672793	1	-0.161526	1	1	-0.709321	0.484423	0.785921	-0.222995	1	1
ssc-miR-132	24	102	126	28	13	27	43	39	57	67	38	63	1.88833	4.19457	6.21261	2.11662	0.923655	1.68508	2.20948	3.38188	2.4755	2.47858	1.53527	2.55631	-0.275963	0.83865	1	-1.20859	0.174898	0.411011	-0.482998	0.631296	0.908912	0.445408	0.786412	1
ssc-miR-133a-3p	61467	199390	194242	245746	177407	274014	131959	87209	170007	155578	385498	267758	4836.24	8199.56	9577.37	18576.8	12604.8	17101.4	6780.49	7562.32	7383.39	5755.41	15574.8	10864.6	0.280631	0.432946	1	1.20165	0.000915823	0.00463547	0.336332	0.347445	0.642188	-0.58468	0.103051	0.614777
ssc-miR-133a-5p	3779	8116	8481	6102	4861	5249	4073	2973	5101	9899	14909	9353	297.333	333.756	418.168	461.272	345.376	327.593	209.284	257.803	221.536	366.201	602.35	379.51	-0.277177	0.315025	0.975628	0.219671	0.419383	0.753973	0.745913	0.0064127	0.0248209	0.249084	0.357583	1
ssc-miR-133b	48184	163545	160374	188547	144070	222332	105502	70947	132404	123296	309757	217584	3791.13	6725.5	7907.46	14252.9	10236.2	13875.9	5421.04	6152.16	5750.29	4561.18	12514.7	8828.75	0.246371	0.495528	1	1.16528	0.00144676	0.00689833	0.352339	0.329947	0.613292	-0.566573	0.117769	0.663338
ssc-miR-1343	1691	4356	3521	1011	1450	1694	2394	1738	2390	2456	2347	1956	133.048	179.133	173.608	76.425	103.023	105.723	123.012	150.71	103.797	90.8566	94.823	79.3672	-0.0448187	0.863281	1	-0.656876	0.00651363	0.0267873	-0.71741	0.00349072	0.0149788	-0.105439	0.686368	1
ssc-miR-135	13	85	52	2	4	9	47	19	23	1	4	1	1.02284	3.49547	2.56393	0.151187	0.284202	0.561695	2.41501	1.64758	0.998887	0.0369937	0.161607	0.0405763	-0.154333	1	1	-2.34836	0.0814786	0.225264	-3.28449	0.0688861	0.173004	-1.15964	1	1
ssc-miR-136	1097	3343	4082	49	174	180	2993	1376	3093	522	334	255	86.3123	137.475	201.269	3.70408	12.3628	11.2339	153.79	119.32	134.329	19.3107	13.4942	10.347	0.27088	0.449938	1	-3.83883	4.14594e-18	3.41004e-16	-3.4549	2.03847e-16	1.34131e-14	0.653284	0.200133	0.839587
ssc-miR-137	0	3	1	0	0	0	2	0	0	0	0	1	0	0.12337	0.0493064	0	0	0	0.102767	0	0	0	0	0.0405763	-0.112409	1	1	-0.529339	1	1	-0.234893	1	1	0.148223	1	1
ssc-miR-138	0	1	1	3	0	2	3	0	1	0	1	0	0	0.0411232	0.0493064	0.226781	0	0.124821	0.15415	0	0.0434299	0	0.0404018	0	0.388351	1	1	0.680888	1	1	-0.511228	1	1	-0.806657	1	1
ssc-miR-139-3p	679	1279	1334	692	997	374	806	533	711	1258	1024	830	53.4239	52.5966	65.7747	52.3107	70.8373	23.3415	41.4149	46.219	30.8787	46.5381	41.3714	33.6783	-0.221521	0.537987	1	-0.121175	0.728608	1	-0.167635	0.681061	0.941467	-0.268044	0.475118	1
ssc-miR-139-5p	1282	2877	4603	1794	1945	1849	2386	1680	2690	2705	2002	1601	100.868	118.311	226.957	135.615	138.193	115.397	122.6	145.681	116.826	100.068	80.8843	64.9626	0.105623	0.749709	1	-0.0957943	0.776118	1	-0.862905	0.0076668	0.0286634	-0.661561	0.0416058	0.414798
ssc-miR-140-3p	2853	8892	3723	3559	2554	2632	6288	2971	5133	3915	4852	6052	224.475	365.668	183.568	269.037	181.463	164.265	323.098	257.63	222.926	144.831	196.029	245.568	0.385101	0.209147	0.788049	-0.211965	0.494188	0.814941	-0.66508	0.0312913	0.0893536	-0.0680387	0.827033	1
ssc-miR-140-5p	496	1649	1065	402	548	726	977	551	857	585	863	1037	39.0254	67.8122	52.5113	30.3886	38.9356	45.31	50.2015	47.7799	37.2194	21.6413	34.8667	42.0776	0.0857468	0.822154	1	-0.360775	0.259323	0.535956	-0.663163	0.0434197	0.118058	-0.216823	0.532513	1
ssc-miR-142-3p	25	110	80	34	150	336	71	62	146	429	612	1040	1.96701	4.52355	3.94451	2.57018	10.6576	20.9699	3.64821	5.37632	6.34076	15.8703	24.7259	42.1993	0.872441	0.272311	0.933232	1.78648	0.00827401	0.032797	2.17661	0.000174726	0.00133705	1.26644	0.0155812	0.221949
ssc-miR-142-5p	61	215	143	733	450	1574	192	85	237	1318	1662	3054	4.7995	8.84149	7.05081	55.41	31.9727	98.2342	9.86559	7.37077	10.2929	48.7578	67.1477	123.92	0.741276	0.219316	0.798525	3.25361	6.15425e-10	1.19103e-08	2.879	1.23555e-08	2.90354e-07	0.368999	0.401434	1
ssc-miR-143-3p	153086	297580	155616	142154	106719	156337	231757	151549	263631	159908	190675	295595	12044.9	12237.4	7672.86	10745.9	7582.43	9757.08	11908.4	13141.6	11449.5	5915.6	7703.61	11994.1	0.530761	0.0644945	0.461276	-0.0690753	0.809506	1	-0.73276	0.0109032	0.0389909	-0.132924	0.642683	1
ssc-miR-143-5p	171	432	296	268	105	141	440	176	464	135	261	300	13.4543	17.7652	14.5947	20.2591	7.46029	8.79988	22.6086	15.2618	20.1515	4.99416	10.5449	12.1729	0.673184	0.104041	0.55779	-0.212675	0.686083	0.997461	-1.27859	0.00355916	0.0150124	-0.393498	0.444433	1
ssc-miR-144	59	201	192	20	68	241	125	80	172	147	500	136	4.64214	8.26577	9.46683	1.51187	4.83143	15.0409	6.42291	6.93719	7.46994	5.43808	20.2009	5.51837	0.226599	0.754295	1	0.0434796	1	1	0.351597	0.646028	0.916134	0.535204	0.406869	1
ssc-miR-145-3p	2018	5627	4112	1627	2251	3246	3648	2037	3870	4344	3431	4600	158.777	231.4	202.748	122.991	159.934	202.585	187.446	176.638	168.074	160.701	138.618	186.651	0.178011	0.485016	1	-0.176014	0.498724	0.814941	-0.352639	0.169441	0.352823	0.00136665	1	1
ssc-miR-145-5p	60	190	119	160	107	74	211	116	236	70	119	147	4.72082	7.81341	5.86746	12.095	7.60239	4.61838	10.8419	10.0589	10.2495	2.58956	4.80781	5.96471	1.07167	0.0338242	0.354501	0.505441	0.435794	0.775007	-1.41115	0.00991796	0.0358572	-0.845894	0.151121	0.742071
ssc-miR-1468	13574	23812	19510	20049	27194	25638	17412	11421	18453	30873	20683	21164	1068.01	979.226	961.968	1515.57	1932.15	1600.08	894.686	990.371	801.412	1142.11	835.63	858.756	0.163695	0.424559	1	0.857524	2.85106e-05	0.000223333	-0.137636	0.502401	0.802378	-0.831462	4.9616e-05	0.00544122
ssc-miR-146a-5p	469	1207	637	2246	1301	1045	985	564	974	2303	3032	4920	36.9011	49.6357	31.4082	169.783	92.4366	65.219	50.6125	48.9072	42.3007	85.1966	122.498	199.635	0.595999	0.141346	0.639221	1.58581	6.50366e-05	0.000440496	1.30414	0.000812458	0.00477319	0.31465	0.404557	1
ssc-miR-146b	693	3642	1765	1281	1268	780	1978	980	1467	3033	3263	6652	54.5255	149.771	87.0258	96.8353	90.0919	48.6802	101.636	84.9806	63.7116	112.202	131.831	269.913	0.102132	0.813701	1	-0.188125	0.659243	0.968263	0.833681	0.042963	0.11779	1.12399	0.00670537	0.183839
ssc-miR-148a-3p	216416	748699	345904	192236	225894	195962	1134295	353020	341738	470057	349394	397972	17027.7	30788.9	17055.3	14531.8	16049.9	12230.1	58283.8	30612.1	14841.6	17389.2	14116.1	16148.2	0.961127	0.00948605	0.249954	-0.480642	0.191624	0.447122	-1.28719	0.000560487	0.00354616	0.154575	0.673956	1
ssc-miR-148a-5p	286	853	462	190	262	239	832	300	309	623	561	617	22.5026	35.0781	22.7796	14.3628	18.6152	14.9161	42.7509	26.0145	13.4198	23.0471	22.6654	25.0356	0.3339	0.394562	1	-0.628116	0.116861	0.305138	-0.402551	0.293792	0.561963	0.559218	0.163667	0.7584
ssc-miR-148b-3p	6506	16658	9410	5891	5185	5730	15175	7737	10980	8903	10484	10629	511.894	685.03	463.973	445.321	368.396	357.612	779.741	670.913	476.86	329.355	423.572	431.285	0.530625	0.0194373	0.290676	-0.387803	0.0897586	0.246088	-0.902635	8.00431e-05	0.000711734	0.0157756	0.949284	1
ssc-miR-148b-5p	141	374	213	111	137	145	320	155	209	212	234	202	11.0939	15.3801	10.5023	8.39088	9.73391	9.04953	16.4426	13.4408	9.07685	7.84267	9.45401	8.19641	0.390371	0.406112	1	-0.327296	0.468984	0.805609	-0.807804	0.076551	0.187157	-0.0908424	0.905992	1
ssc-miR-149	2322	6314	6527	1975	1915	3089	3311	2255	3828	3510	2997	2903	182.696	259.652	321.823	149.297	136.062	192.786	170.13	195.542	166.25	129.848	121.084	117.793	-0.195563	0.451693	1	-0.568972	0.0284404	0.0929102	-0.747916	0.00471909	0.0194073	-0.374567	0.162046	0.7584
ssc-miR-150	146	353	397	646	452	794	432	239	616	509	525	807	11.4873	14.5165	19.5746	48.8334	32.1148	49.554	22.1976	20.7249	26.7528	18.8298	21.2109	32.7451	0.945777	0.0160516	0.290597	1.61834	1.2966e-05	0.000112258	-0.166957	0.65797	0.925094	-0.83907	0.0161908	0.221949
ssc-miR-151-3p	32873	61884	47203	86754	57598	48720	42218	22952	40368	96832	75487	87337	2586.46	2544.87	2327.41	6558.04	4092.36	3040.64	2169.3	1990.28	1753.18	3582.18	3049.81	3543.81	-0.00619128	0.982015	1	0.988396	0.000192224	0.0011095	0.566507	0.0317105	0.0893536	-0.428077	0.103572	0.614777
ssc-miR-151-5p	211	645	545	417	283	551	274	142	244	662	786	748	16.6016	26.5245	26.872	31.5225	20.1073	34.3882	14.079	12.3135	10.5969	24.4899	31.7558	30.3511	-0.593132	0.141833	0.639221	0.406108	0.251322	0.533452	1.00845	0.00737043	0.0278721	0.00963238	1	1
ssc-miR-152	16443	51122	17019	13555	8276	10976	47776	19135	30556	12454	18793	14774	1293.74	2102.3	839.145	1024.67	588.013	685.018	2454.89	1659.29	1327.04	460.72	759.271	599.474	0.68416	0.0477366	0.413298	-0.759322	0.0285226	0.0929102	-1.78008	5.17767e-07	8.51726e-06	-0.336615	0.331556	1
ssc-miR-153	2	1	2	1	0	0	2	1	1	0	0	0	0.157361	0.0411232	0.0986128	0.0755935	0	0	0.102767	0.0867149	0.0434299	0	0	0	-0.01194	1	1	-0.543231	1	1	-0.739722	1	1	-0.264936	1	1
ssc-miR-155-3p	2	0	2	0	0	1	0	0	0	0	0	2	0.157361	0	0.0986128	0	0	0.0624105	0	0	0	0	0	0.0811526	-0.690877	1	1	-0.498446	1	1	0.265051	1	1	0.0605285	1	1
ssc-miR-155-5p	112	363	361	94	82	85	238	116	205	152	219	278	8.8122	14.9277	17.7996	7.10579	5.82613	5.3049	12.2292	10.0589	8.90313	5.62305	8.84799	11.2802	-0.0906929	0.925911	1	-1.06307	0.0309673	0.0989149	-0.482052	0.38295	0.692255	0.489281	0.366722	1
ssc-miR-15a	14	61	33	42	48	63	56	17	34	75	96	94	1.10152	2.50852	1.62711	3.17493	3.41042	3.93186	2.87746	1.47415	1.47662	2.77453	3.87857	3.81417	0.446778	1	1	1.06314	0.241547	0.522822	0.604949	0.48493	0.785921	-0.00662979	1	1
ssc-miR-15b	10	47	19	48	31	47	34	16	35	31	67	46	0.786803	1.93279	0.936821	3.62849	2.20256	2.93329	1.74703	1.38744	1.52005	1.14681	2.70692	1.86651	0.616913	0.736408	1	1.28561	0.168327	0.40423	0.0792	1	1	-0.584409	0.631039	1
ssc-miR-16	478	1604	1161	1761	1275	2904	1268	555	1023	1233	1795	1544	37.6092	65.9616	57.2447	133.12	90.5893	181.24	65.154	48.1268	44.4288	45.6133	72.5212	62.6498	0.29573	0.384394	1	1.44223	9.03341e-06	8.03241e-05	-0.0154292	0.979328	1	-1.16182	0.000314208	0.0149627
ssc-miR-17-3p	14	62	37	5	6	23	31	33	21	22	34	19	1.10152	2.54964	1.82434	0.377968	0.426302	1.43544	1.59288	2.86159	0.912028	0.813862	1.37366	0.770949	0.271172	1	1	-1.06149	0.468797	0.805609	-0.972785	0.526356	0.809211	0.350373	1	1
ssc-miR-17-5p	474	1418	1099	1275	733	481	991	856	1506	1204	1560	997	37.2945	58.3127	54.1877	96.3817	52.08	30.0195	50.9208	74.228	65.4054	44.5405	63.0268	40.4546	0.684588	0.0756194	0.497576	0.363289	0.359781	0.672545	-0.590625	0.127277	0.279161	-0.26934	0.503784	1
ssc-miR-181a	23707	63561	55378	19780	21488	29432	35179	16216	27950	27989	23049	20528	1865.27	2613.83	2730.49	1495.24	1526.73	1836.87	1807.61	1406.17	1213.87	1035.42	931.22	832.95	-0.38397	0.0886533	0.530308	-0.45971	0.0415181	0.128251	-0.871046	0.000130327	0.00109943	-0.795315	0.000467871	0.0171033
ssc-miR-181b	5951	14972	13489	7726	7619	6256	9499	4191	8639	6714	7379	6644	468.227	615.697	665.094	584.035	541.333	390.44	488.09	363.422	375.191	248.376	298.125	269.589	-0.181721	0.460024	1	-0.0971975	0.69231	0.997461	-0.808436	0.00115817	0.00624654	-0.892983	0.000318354	0.0149627
ssc-miR-181c	46	147	123	6	7	29	98	41	78	38	35	29	3.6193	6.04511	6.06469	0.453561	0.497353	1.80991	5.03556	3.55531	3.38753	1.40576	1.41406	1.17671	-0.0682709	1	1	-2.2572	0.0129241	0.0477756	-1.69806	0.066715	0.170149	0.479298	1	1
ssc-miR-181d-3p	0	0	1	0	0	0	0	0	2	0	0	1	0	0	0.0493064	0	0	0	0	0	0.0868598	0	0	0.0405763	0.173268	1	1	-0.172006	1	1	-0.183624	1	1	0.148223	1	1
ssc-miR-181d-5p	4256	10677	10028	5241	5126	4656	6482	2914	6098	4716	5461	4744	334.864	439.073	494.445	396.186	364.204	290.583	333.066	252.687	264.835	174.463	220.634	192.494	-0.245549	0.315657	0.975628	-0.162556	0.504469	0.814941	-0.755413	0.00233616	0.01098	-0.838438	0.000710642	0.0212547
ssc-miR-182	78	178	194	372	350	652	424	397	564	829	1115	906	6.13707	7.31993	9.56544	28.1208	24.8676	40.6917	21.7865	34.4258	24.4945	30.6678	45.048	36.7621	2.11355	3.7309e-07	0.000122747	2.11631	2.08972e-07	2.54636e-06	0.264263	0.46354	0.782075	0.262865	0.463596	1
ssc-miR-183	71	143	109	45	49	551	188	250	140	180	156	523	5.5863	5.88062	5.3744	3.40171	3.48147	34.3882	9.66006	21.6787	6.08018	6.65887	6.30268	21.2214	1.41476	0.0812054	0.505077	1.38463	0.0750216	0.212777	-0.300499	0.736756	0.97739	-0.269174	0.748861	1
ssc-miR-1839-3p	0	0	2	0	0	0	0	0	0	0	0	0	0	0	0.0986128	0	0	0	0	0	0	0	0	0	-0.306484	1	1	-0.325681	1	1	2.56274e-15	1	1	-2.56274e-15	1	1
ssc-miR-1839-5p	18	37	19	11	9	24	41	16	28	22	18	17	1.41625	1.52156	0.936821	0.831529	0.639454	1.49785	2.10671	1.38744	1.21604	0.813862	0.727232	0.689797	0.555708	0.736765	1	-0.244949	1	1	-1.15234	0.468644	0.78266	-0.359727	1	1
ssc-miR-184	54	183	54	41	164	134	148	76	58	364	35	85	4.24874	7.52555	2.66255	3.09933	11.6523	8.36301	7.60472	6.59033	2.51893	13.4657	1.41406	3.44898	0.509023	0.571704	1	0.779136	0.266918	0.545441	-0.0594551	1	1	-0.328694	0.642354	1
ssc-miR-185	674	1982	1266	894	525	702	1160	769	1455	1336	1963	1691	53.0305	81.5062	62.4219	67.5806	37.3015	43.8122	59.6046	66.6838	63.1905	49.4236	79.3087	68.6145	0.281563	0.361172	1	-0.291223	0.365481	0.674082	-0.165264	0.604711	0.900226	0.407489	0.198897	0.839587
ssc-miR-186	3153	10058	6528	2780	2244	5089	6261	3049	5339	2843	5519	4918	248.079	413.617	321.872	210.15	159.437	317.607	321.711	264.394	231.872	105.173	222.977	199.554	0.0606001	0.855802	1	-0.403236	0.222118	0.493763	-0.844546	0.0115706	0.0409326	-0.380749	0.256431	0.858837
ssc-miR-187	49	126	126	10	8	4	58	38	140	7	5	18	3.85534	5.18152	6.21261	0.755935	0.568403	0.249642	2.98023	3.29517	6.08018	0.258956	0.202009	0.730373	0.0314709	1	1	-2.90444	0.00465803	0.0196474	-3.21959	0.00329936	0.0146688	-0.315324	1	1
ssc-miR-18a	17	32	49	10	8	11	38	14	63	36	49	37	1.33757	1.31594	2.41601	0.755935	0.568403	0.686516	1.95256	1.21401	2.73608	1.33177	1.97969	1.50132	0.513098	0.569538	1	-1.09218	0.468608	0.805609	-0.478782	0.765203	1	1.12061	0.468608	1
ssc-miR-18b	12	23	37	6	6	9	19	8	46	26	38	26	0.944164	0.945834	1.82434	0.453561	0.426302	0.561695	0.976282	0.693719	1.99777	0.961837	1.53527	1.05498	0.281916	1	1	-1.07643	0.696611	0.997461	-0.23923	1	1	1.11225	0.387327	1
ssc-miR-190a	13	42	44	20	12	29	24	26	21	26	43	28	1.02284	1.72717	2.16948	1.51187	0.852605	1.80991	1.2332	2.25459	0.912028	0.961837	1.73728	1.13614	0.146923	1	1	-0.11618	1	1	-0.372676	1	1	-0.111764	1	1
ssc-miR-190b	35	80	56	29	18	55	76	88	85	62	156	84	2.75381	3.28986	2.76116	2.19221	1.27891	3.43258	3.90513	7.63091	3.69154	2.29361	6.30268	3.40841	1.0738	0.147693	0.647881	-0.228056	1	1	-0.535174	0.492924	0.791083	0.766224	0.398915	1
ssc-miR-191	12194	33250	29875	24246	18252	24072	19492	11605	21135	27367	34953	35147	959.428	1367.35	1473.03	1832.84	1296.81	1502.35	1001.56	1006.33	917.891	1012.41	1412.16	1426.13	-0.0459467	0.853779	1	0.394734	0.108958	0.289089	0.17419	0.48088	0.785921	-0.266488	0.278965	0.908709
ssc-miR-192	234	529	406	221	321	345	450	224	381	770	454	699	18.4112	21.7542	20.0184	16.7062	22.8072	21.5316	23.1225	19.4241	16.5468	28.4852	18.3424	28.3628	0.294821	0.409595	1	0.131433	0.786192	1	0.135494	0.703987	0.949229	0.299018	0.417555	1
ssc-miR-193a-3p	1	9	8	4	1	1	4	4	5	5	11	7	0.0786803	0.370109	0.394451	0.302374	0.0710504	0.0624105	0.205533	0.34686	0.217149	0.184969	0.44442	0.284034	0.13033	1	1	-0.518834	1	1	0.0250828	1	1	0.668125	1	1
ssc-miR-193a-5p	786	2612	1624	1020	827	878	2671	934	1027	1399	1643	1412	61.8427	107.414	80.0736	77.1054	58.7587	54.7964	137.245	80.9917	44.6025	51.7542	66.3801	57.2937	0.369632	0.283122	0.953673	-0.272401	0.434412	0.775007	-0.761818	0.026693	0.0786595	-0.119881	0.730885	1
ssc-miR-194a	30	48	33	24	10	35	35	26	28	36	35	38	2.36041	1.97391	1.62711	1.81424	0.710504	2.18437	1.79841	2.25459	1.21604	1.33177	1.41406	1.5419	0.134146	1	1	-0.213208	1	1	-0.469485	0.764867	1	-0.124821	1	1
ssc-miR-194b-5p	29	30	27	19	10	28	26	18	21	28	30	30	2.28173	1.2337	1.33127	1.43628	0.710504	1.74749	1.33597	1.56087	0.912028	1.03582	1.21205	1.21729	-0.0239786	1	1	-0.187808	1	1	-0.313986	1	1	-0.152822	1	1
ssc-miR-195	83	139	124	177	231	369	170	91	173	339	404	384	6.53047	5.71613	6.11399	13.3801	16.4126	23.0295	8.73516	7.89106	7.51337	12.5409	16.3223	15.5813	0.707407	0.183419	0.735914	1.61542	0.00027959	0.00150795	0.659116	0.16145	0.33957	-0.247224	0.536713	1
ssc-miR-196a	5850	17785	13028	6503	7173	7950	10827	7888	10989	11825	10817	13170	460.28	731.376	642.364	491.585	509.645	496.164	556.327	684.007	477.251	437.451	437.026	534.39	0.225802	0.306416	0.969335	-0.180407	0.41506	0.750301	-0.494096	0.0256574	0.0774428	-0.0878951	0.694156	1
ssc-miR-196b-3p	2	6	9	1	2	0	2	4	2	1	1	3	0.157361	0.246739	0.443758	0.0755935	0.142101	0	0.102767	0.34686	0.0868598	0.0369937	0.0404018	0.121729	-0.218097	1	1	-0.986189	1	1	-0.766161	1	1	-0.045925	1	1
ssc-miR-196b-5p	6425	19147	14834	5967	6439	7550	12154	8241	11011	11241	9914	11629	505.521	787.386	731.411	451.067	457.494	471.2	624.512	714.617	478.207	415.847	400.543	471.862	0.159385	0.462034	1	-0.44164	0.0417108	0.128251	-0.699985	0.00130774	0.00693947	-0.0989749	0.652698	1
ssc-miR-199a-3p	28728	104595	39271	40731	14952	19605	123953	42476	66324	28170	39991	38866	2260.33	4301.28	1936.31	3079	1062.35	1223.56	6369.11	3683.3	2880.44	1042.11	1615.71	1577.04	0.920748	0.031329	0.354501	-0.541829	0.203178	0.459602	-1.80378	3.70682e-05	0.000348441	-0.341211	0.422649	1
ssc-miR-199a-5p	47299	218087	49657	32018	39953	22038	192317	63518	56232	60554	70692	72174	3721.5	8968.44	2448.41	2420.35	2838.68	1375.4	9881.88	5507.96	2442.15	2240.12	2856.08	2928.55	0.526373	0.265914	0.920902	-1.06229	0.0259953	0.0890879	-1.31419	0.00615476	0.0241061	0.27447	0.561539	1
ssc-miR-199b-3p	28687	104332	39166	40721	14931	19592	123817	42433	66273	28110	39942	38815	2257.1	4290.47	1931.13	3078.24	1060.85	1222.75	6362.12	3679.57	2878.23	1039.89	1613.73	1574.97	0.92259	0.0310499	0.354501	-0.539385	0.205354	0.459602	-1.80449	3.70277e-05	0.000348441	-0.342526	0.421012	1
ssc-miR-199b-5p	6584	25171	8369	4676	3843	3863	26528	9798	9735	6293	9911	7555	518.031	1035.11	412.645	353.475	273.047	241.092	1363.1	849.633	422.79	232.802	400.422	306.554	0.716531	0.0671191	0.469833	-1.05655	0.00751893	0.0302519	-1.65782	3.45702e-05	0.000344655	0.115218	0.772829	1
ssc-miR-19a	267	964	868	147	192	249	508	304	513	297	499	339	21.0076	39.6428	42.7979	11.1122	13.6417	15.5402	26.1027	26.3613	22.2795	10.9871	20.1605	13.7554	-0.144478	0.739486	1	-1.24319	0.00100065	0.00491365	-0.943104	0.0142345	0.0474045	0.154875	0.741967	1
ssc-miR-19b	424	1643	1109	229	219	350	794	468	772	338	562	454	33.3605	67.5654	54.6808	17.3109	15.56	21.8437	40.7983	40.5826	33.5279	12.5039	22.7058	18.4216	-0.110992	0.733109	1	-1.38924	5.9489e-05	0.000416423	-1.30622	0.000233881	0.00170993	-0.028653	1	1
ssc-miR-202-3p	4	10	17	2	1	0	4	0	4	0	3	0	0.314721	0.411232	0.838209	0.151187	0.0710504	0	0.205533	0	0.17372	0	0.121205	0	-1.15236	1	1	-1.63403	0.505313	0.814941	-0.684897	1	1	-0.267367	1	1
ssc-miR-202-5p	1	31	42	3	5	0	16	12	30	7	5	9	0.0786803	1.27482	2.07087	0.226781	0.355252	0	0.822132	1.04058	1.3029	0.258956	0.202009	0.365187	0.18982	1	1	-1.90583	0.632647	0.937572	-1.72951	0.632647	0.908912	0.327778	1	1
ssc-miR-204	149	455	539	285	390	927	258	218	347	427	414	399	11.7234	18.7111	26.5761	21.5442	27.7097	57.8546	13.2569	18.9038	15.0702	15.7963	16.7263	16.1899	0.0521977	0.949226	1	1.01198	0.0146076	0.0533989	-0.171021	0.734535	0.97739	-1.13068	0.00742014	0.18503
ssc-miR-205	11	8	32	33	0	3	6	11	3	1	2	2	0.865484	0.328986	1.5778	2.49459	0	0.187232	0.3083	0.953864	0.13029	0.0369937	0.0808035	0.0811526	-0.566393	1	1	0.0550059	1	1	-1.74189	1	1	-2.41303	0.258123	0.858837
ssc-miR-206	4740470	6757413	7021051	2133356	2600313	2989636	3926890	2661854	3763941	5865809	3347006	3887864	372982	277887	346183	161268	184753	186585	201776	230822	163468	216998	135225	157755	-0.42637	0.0620383	0.460508	-0.796142	0.000522567	0.00272896	-0.432405	0.0584517	0.150239	-0.0626327	0.783637	1
ssc-miR-208b	273	549	411	54	82	291	166	78	382	287	266	236	21.4797	22.5766	20.2649	4.08205	5.82613	18.1615	8.52962	6.76376	16.5902	10.6172	10.7469	9.576	-0.644328	0.179608	0.72952	-1.07446	0.0244512	0.0855792	-0.290682	0.59289	0.890689	0.1387	0.848424	1
ssc-miR-20a	649	1870	1279	1855	1106	1117	1520	1103	2333	1287	2079	1372	51.0635	76.9004	63.0629	140.226	78.5818	69.7126	78.1026	95.6465	101.322	47.6109	83.9953	55.6707	0.873992	0.0107526	0.249954	0.706732	0.0374114	0.11835	-0.789745	0.0208042	0.0664521	-0.622488	0.0670242	0.512813
ssc-miR-20b	254	751	626	781	365	269	592	410	892	602	752	478	19.9848	30.8835	30.8658	59.0385	25.9334	16.7884	30.4189	35.5531	38.7395	22.2702	30.3821	19.3955	0.698964	0.103311	0.55779	0.424978	0.325505	0.624892	-0.769876	0.0737325	0.182391	-0.495966	0.246846	0.858837
ssc-miR-21	29604	112065	59652	46345	46060	55590	111838	72731	73791	174739	148144	306273	2329.25	4608.47	2941.22	3503.38	3272.58	3469.4	5746.6	6306.86	3204.73	6464.25	5985.28	12427.4	0.928311	0.00483952	0.15922	0.169444	0.604503	0.931895	0.520939	0.111582	0.253176	1.27981	0.000114463	0.00941462
ssc-miR-210	55	327	133	13	18	82	158	60	92	67	79	75	4.32742	13.4473	6.55775	0.982716	1.27891	5.11766	8.11856	5.20289	3.99555	2.47858	3.19174	3.04322	-0.165482	0.795826	1	-1.56049	0.0266911	0.0905295	-1.16168	0.116316	0.260326	0.229055	0.818824	1
ssc-miR-212	16	143	114	22	36	21	76	60	85	75	62	67	1.25889	5.88062	5.62093	1.66306	2.55781	1.31062	3.90513	5.20289	3.69154	2.77453	2.50491	2.71861	0.317558	0.720091	1	-1.04692	0.275279	0.548889	-0.857333	0.230368	0.45934	0.503452	0.803118	1
ssc-miR-214	629	3061	978	427	260	359	1658	474	589	509	497	618	49.4899	125.878	48.2217	32.2784	18.4731	22.4054	85.1935	41.1029	25.5802	18.8298	20.0797	25.0761	-0.253737	0.564935	1	-1.48438	0.000949763	0.00473442	-1.42225	0.00207403	0.0100346	-0.192192	0.719999	1
ssc-miR-215	29	84	33	26	31	40	40	18	35	62	50	80	2.28173	3.45435	1.62711	1.96543	2.20256	2.49642	2.05533	1.56087	1.52005	2.29361	2.02009	3.2461	-0.183946	1	1	-0.0294562	1	1	0.326319	1	1	0.172739	1	1
ssc-miR-216	10	20	16	2	0	2	18	8	23	3	2	1	0.786803	0.822464	0.788902	0.151187	0	0.124821	0.924899	0.693719	0.998887	0.110981	0.0808035	0.0405763	0.392505	1	1	-2.01916	0.505149	0.814941	-2.43671	0.257724	0.501723	-0.100121	1	1
ssc-miR-217	19	68	27	6	5	8	37	11	29	3	2	1	1.49493	2.79638	1.33127	0.453561	0.355252	0.499284	1.90118	0.953864	1.25947	0.110981	0.0808035	0.0405763	-0.116649	1	1	-1.73662	0.232686	0.506978	-3.02553	0.132544	0.287141	-1.47049	1	1
ssc-miR-218	901	2342	2003	345	362	415	1695	737	1453	1042	541	1036	70.891	96.3106	98.7607	26.0798	25.7203	25.9004	87.0947	63.9089	63.1036	38.5475	21.8574	42.037	0.0133077	0.965716	1	-1.66039	7.99382e-08	1.05199e-06	-1.27615	2.62049e-05	0.000269419	0.397137	0.261045	0.858837
ssc-miR-218-3p	0	0	2	0	0	0	0	0	0	0	0	0	0	0	0.0986128	0	0	0	0	0	0	0	0	0	-0.306484	1	1	-0.325681	1	1	2.56274e-15	1	1	-2.56274e-15	1	1
ssc-miR-218-5p	901	2342	2003	345	362	415	1695	737	1453	1042	541	1036	70.891	96.3106	98.7607	26.0798	25.7203	25.9004	87.0947	63.9089	63.1036	38.5475	21.8574	42.037	0.0133077	0.965716	1	-1.66039	7.99382e-08	1.05199e-06	-1.27615	2.62049e-05	0.000269419	0.397137	0.261045	0.858837
ssc-miR-218b	901	2342	2003	345	362	415	1696	740	1453	1043	541	1036	70.891	96.3106	98.7607	26.0798	25.7203	25.9004	87.146	64.169	63.1036	38.5845	21.8574	42.037	0.0152723	0.96569	1	-1.66039	7.83858e-08	1.05199e-06	-1.27759	2.58852e-05	0.000269419	0.397656	0.260785	0.858837
ssc-miR-219a	14	35	19	14	6	7	15	8	12	17	19	12	1.10152	1.43931	0.936821	1.05831	0.426302	0.436874	0.770749	0.693719	0.521159	0.628894	0.767634	0.486915	-0.425126	1	1	-0.64899	1	1	-0.240494	1	1	-0.0240993	1	1
ssc-miR-219b-3p	1	7	0	0	0	0	5	0	1	0	0	0	0.0786803	0.287862	0	0	0	0	0.256916	0	0.0434299	0	0	0	0.0167377	1	1	-0.956595	1	1	-0.898239	1	1	-2.56274e-15	1	1
ssc-miR-221-3p	78	400	189	334	121	146	453	364	453	220	466	408	6.13707	16.4493	9.31891	25.2482	8.5971	9.11194	23.2766	31.5642	19.6737	8.13862	18.8272	16.5551	1.53191	0.000978424	0.0479543	0.538682	0.298509	0.589374	-0.974698	0.0302564	0.0873189	0.0186467	1	1
ssc-miR-221-5p	24	30	20	51	18	27	35	29	35	96	87	224	1.88833	1.2337	0.986128	3.85527	1.27891	1.68508	1.79841	2.51473	1.52005	3.5514	3.51495	9.08909	0.768488	0.765831	1	0.786646	0.57069	0.894081	1.21158	0.110482	0.252422	1.20021	0.131263	0.716918
ssc-miR-222	627	1897	1112	1264	1005	889	1381	1425	1150	1729	3324	2929	49.3326	78.0107	54.8287	95.5502	71.4057	55.483	70.9603	123.569	49.9444	63.9622	134.295	118.848	0.721608	0.0475964	0.413298	0.402228	0.274653	0.548889	0.191365	0.591458	0.890689	0.51083	0.150136	0.742071
ssc-miR-22-3p	6520	15167	16756	26917	26105	61359	8772	6981	12343	45896	56672	47895	512.996	623.716	826.178	2034.75	1854.77	3829.45	450.734	605.357	536.055	1697.86	2289.65	1943.4	0.0325193	0.919548	1	2.08134	1.79762e-10	4.92847e-09	1.66867	2.33709e-07	4.04685e-06	-0.380132	0.225901	0.858837
ssc-miR-224	37	167	28	30	10	0	81	11	7	44	150	55	2.91117	6.86758	1.38058	2.26781	0.710504	0	4.16205	0.953864	0.304009	1.62772	6.06027	2.2317	-0.689507	0.496598	1	-1.67453	0.0797794	0.223209	0.6363	0.638642	0.910524	1.61824	0.118957	0.663338
ssc-miR-22-5p	304	740	763	1914	1375	3326	434	334	592	2288	2084	2297	23.9188	30.4312	37.6208	144.686	97.6943	207.577	22.3003	28.9628	25.7105	84.6417	84.1973	93.2037	0.0723927	0.848612	1	2.39435	4.25284e-13	1.74898e-11	1.54234	5.15958e-06	6.52885e-05	-0.779126	0.0103962	0.18503
ssc-miR-2320-3p	587	1233	842	331	386	874	696	409	608	635	810	853	46.1854	50.7049	41.516	25.0215	27.4255	54.5468	35.7628	35.4664	26.4054	23.491	32.7254	34.6116	-0.181234	0.619417	1	-0.257557	0.441349	0.780665	-0.311611	0.388068	0.697675	-0.23542	0.513774	1
ssc-miR-2320-5p	51	181	129	100	39	39	146	89	163	91	116	90	4.0127	7.4433	6.36052	7.55935	2.77097	2.43401	7.50196	7.71763	7.07907	3.36643	4.68661	3.65187	0.638043	0.284073	0.953673	-0.360252	0.62743	0.937572	-1.11779	0.0736238	0.182391	-0.121283	1	1
ssc-miR-2366	43	108	80	30	30	14	40	37	70	75	85	106	3.38325	4.44131	3.94451	2.26781	2.13151	0.873747	2.05533	3.20845	3.04009	2.77453	3.43415	4.30109	-0.170484	1	1	-0.998083	0.36675	0.674082	0.120586	1	1	0.946482	0.241251	0.858837
ssc-miR-23a	2343	7454	5654	2213	1992	3272	5543	3025	5854	3123	3281	2925	184.348	306.532	278.778	167.288	141.532	204.207	284.818	262.313	254.239	115.531	132.558	118.686	0.392569	0.116406	0.576213	-0.473365	0.0596608	0.173703	-1.34958	1.51669e-07	2.93524e-06	-0.483721	0.0619705	0.499639
ssc-miR-23b	3411	10621	9416	4729	4074	4956	8351	5422	9862	6602	6338	5479	268.379	436.77	464.269	357.482	289.459	309.307	429.102	470.168	428.306	244.233	256.066	222.317	0.516242	0.0353108	0.354501	-0.181127	0.464101	0.805609	-1.10131	1.00301e-05	0.00011379	-0.403971	0.10592	0.614777
ssc-miR-2411	25	57	49	20	17	16	42	41	45	26	23	30	1.96701	2.34402	2.41601	1.51187	1.20786	0.998568	2.1581	3.55531	1.95435	0.961837	0.929241	1.21729	0.484489	0.803138	1	-0.691536	0.764764	1	-1.40049	0.249914	0.495311	-0.232781	1	1
ssc-miR-24-1-5p	831	2511	1594	246	410	702	1313	793	1051	755	958	822	65.3834	103.26	78.5944	18.596	29.1307	43.8122	67.4662	68.7649	45.6448	27.9303	38.7049	33.3537	-0.126159	0.697348	1	-1.31621	3.34906e-05	0.000250418	-1.06282	0.000982198	0.00547701	0.126886	0.754432	1
ssc-miR-24-2-5p	218	618	556	197	209	641	369	230	445	525	387	456	17.1523	25.4141	27.4144	14.8919	14.8495	40.0052	18.9604	19.9444	19.3263	19.4217	15.6355	18.5028	0.0651952	0.866037	1	0.104601	0.833227	1	-0.339112	0.455846	0.777064	-0.378638	0.385955	1
ssc-miR-24-3p	30855	76118	55647	19490	16568	33163	43389	26568	49631	36387	41766	39630	2427.68	3130.22	2743.75	1473.32	1177.16	2069.72	2229.47	2303.84	2155.47	1346.09	1687.42	1608.04	0.0258556	0.914875	1	-0.702089	0.0037726	0.0165491	-0.752179	0.00193783	0.00951562	-0.0242398	0.921101	1
ssc-miR-2483	42	165	118	22	21	36	131	32	84	42	53	54	3.30457	6.78533	5.81815	1.66306	1.49206	2.24678	6.73121	2.77488	3.64811	1.55374	2.14129	2.19112	0.0483157	1	1	-1.38809	0.107258	0.286893	-1.3143	0.087016	0.205959	0.116133	1	1
ssc-miR-26a	328555	953230	845136	292622	376452	896780	500736	279006	435859	827324	744550	826014	25850.8	39199.9	41670.6	22120.3	26747.1	55968.5	25729.5	24194	18929.3	30605.8	30081.1	33516.6	-0.314293	0.333783	1	0.083392	0.797437	1	0.243405	0.453981	0.777064	-0.154279	0.634933	1
ssc-miR-27a	72699	149049	104089	87388	34772	71958	121651	64954	169090	93943	99430	97469	5719.98	6129.37	5132.25	6605.97	2470.57	4490.94	6250.83	5632.48	7343.56	3475.3	4017.15	3954.93	0.539525	0.0936006	0.540256	-0.210489	0.512253	0.822103	-0.995139	0.00213187	0.010165	-0.245127	0.445564	1
ssc-miR-27b-3p	93064	185735	126020	108078	46455	85648	151169	85722	216683	114870	123240	116994	7322.31	7638.02	6213.59	8170	3300.65	5345.34	7767.56	7433.37	9410.52	4249.47	4979.11	4747.18	0.577695	0.0629874	0.460508	-0.21869	0.480524	0.814941	-1.06328	0.000685401	0.00409995	-0.266899	0.389482	1
ssc-miR-27b-5p	465	1089	891	257	230	353	992	433	893	425	413	441	36.5864	44.7832	43.932	19.4275	16.3416	22.0309	50.9722	37.5476	38.7829	15.7223	16.6859	17.8941	0.350021	0.236884	0.83801	-1.00062	0.00180544	0.00848555	-1.54903	2.4663e-06	3.34813e-05	-0.199058	0.601646	1
ssc-miR-28-3p	4410	9358	5652	6111	3418	3860	9370	4903	8919	6319	6099	6622	346.98	384.831	278.68	461.952	242.85	240.905	481.461	425.163	387.351	233.763	246.41	268.696	0.689311	0.0113961	0.249954	0.019492	0.946835	1	-1.00633	0.000243695	0.00174295	-0.336528	0.220121	0.858837
ssc-miR-28-5p	2239	5372	4758	1189	1181	2527	1828	1193	2001	4095	4038	3779	176.165	220.914	234.6	89.8807	83.9105	157.711	93.9286	103.451	86.9032	151.489	163.142	153.338	-0.824086	0.00250989	0.0917503	-0.819774	0.0023908	0.0107296	0.501243	0.0686671	0.173004	0.496919	0.0692113	0.517512
ssc-miR-296-3p	1682	3736	3048	1006	1238	568	2457	1558	2430	2188	2377	1953	132.34	153.636	150.286	76.0471	87.9604	35.4492	126.249	135.102	105.535	80.9423	96.035	79.2455	0.0734766	0.806754	1	-1.01678	0.000507847	0.00269487	-0.729419	0.0118517	0.0414808	0.360724	0.226629	0.858837
ssc-miR-296-5p	25	72	54	12	2	6	73	41	107	11	15	7	1.96701	2.96087	2.66255	0.907122	0.142101	0.374463	3.75098	3.55531	4.647	0.406931	0.606027	0.284034	0.947172	0.305627	0.969335	-2.04941	0.198052	0.452494	-3.07345	0.00322589	0.0145386	-0.105376	1	1
ssc-miR-299	183	708	426	107	40	39	567	280	1079	64	100	45	14.3985	29.1152	21.0045	8.08851	2.84202	2.43401	29.1343	24.2802	46.8609	2.3676	4.04018	1.82593	1.00587	0.0183259	0.290597	-2.12767	9.22818e-05	0.00058386	-3.8027	1.05452e-11	4.95626e-10	-0.674464	0.448571	1
ssc-miR-29a	366	1106	1124	493	536	9175	670	289	331	1349	1842	2015	28.797	45.4823	55.4204	37.2676	38.083	572.617	34.4268	25.0606	14.3753	49.9046	74.4201	81.7612	-0.518594	0.51579	1	2.42426	0.00224653	0.0102654	1.2916	0.100263	0.232299	-1.65089	0.0322555	0.342325
ssc-miR-29b	29	53	39	19	11	309	29	19	8	65	55	109	2.28173	2.17953	1.92295	1.43628	0.781555	19.2849	1.49012	1.64758	0.347439	2.40459	2.2221	4.42281	-0.522722	0.792053	1	1.80251	0.0426295	0.129862	1.10417	0.478872	0.785921	-1.21497	0.142607	0.736008
ssc-miR-29c	294	917	938	388	449	7571	525	241	261	1072	1440	1612	23.132	37.71	46.2494	29.3303	31.9016	472.51	26.9762	20.8983	11.3352	39.6573	58.1786	65.409	-0.561476	0.487735	1	2.41996	0.00241334	0.0107296	1.27419	0.107266	0.246787	-1.70681	0.0279939	0.317586
ssc-miR-301	3	22	13	0	1	0	13	4	10	4	12	5	0.236041	0.904711	0.640983	0	0.0710504	0	0.667983	0.34686	0.434299	0.147975	0.484821	0.202881	0.0204722	1	1	-2.21914	0.505225	0.814941	-0.748706	1	1	1.44054	1	1
ssc-miR-30a-3p	14168	24830	23945	34061	30977	36710	25887	20495	32461	41677	43999	39305	1114.74	1021.09	1180.64	2574.79	2200.93	2291.09	1330.16	1777.22	1409.78	1541.79	1777.64	1594.85	0.774584	0.000103459	0.00850952	1.20034	2.13421e-09	3.90086e-08	-0.0982919	0.620125	0.908912	-0.524047	0.00814748	0.18503
ssc-miR-30a-5p	182354	426658	329542	138389	189763	223074	298250	215459	329759	305247	353467	308982	14347.7	17545.5	16248.5	10461.3	13482.7	13922.2	15325.1	18683.5	14321.4	11292.2	14280.7	12537.3	0.332248	0.100297	0.55779	-0.234704	0.245512	0.525103	-0.557684	0.00590911	0.0234455	0.00926819	0.963552	1
ssc-miR-30b-3p	463	860	747	504	485	876	379	298	400	1145	1011	920	36.429	35.366	36.8319	38.0991	34.4595	54.6716	19.4743	25.841	17.372	42.3578	40.8462	37.3302	-0.470574	0.156295	0.659245	0.337903	0.260647	0.535956	0.730515	0.025974	0.0776859	-0.0777631	0.841628	1
ssc-miR-30b-5p	695	1840	1811	833	628	1442	1508	858	1733	1092	1498	1198	54.6828	75.6667	89.2939	62.9694	44.6197	89.996	77.486	74.4014	75.264	40.3972	60.5219	48.6104	0.381543	0.220869	0.798525	-0.0442053	0.89388	1	-0.826814	0.00928168	0.0343109	-0.401166	0.218129	0.858837
ssc-miR-30c-1-3p	201	495	392	276	241	327	264	199	281	509	493	425	15.8147	20.356	19.3281	20.8638	17.1232	20.4082	13.5652	17.2563	12.2038	18.8298	19.9181	17.2449	-0.0447405	1	1	0.183679	0.616318	0.934417	0.168081	0.69089	0.943185	-0.0602134	0.942962	1
ssc-miR-30c-3p	523	1002	772	545	488	490	745	503	959	866	807	683	41.1498	41.2055	38.0645	41.1985	34.6726	30.5812	38.2805	43.6176	41.6493	32.0366	32.6042	27.7136	0.36944	0.199694	0.765555	-0.0657684	0.860444	1	-0.639259	0.0317762	0.0893536	-0.20418	0.525241	1
ssc-miR-30c-5p	30112	76120	78186	45620	46629	47785	68747	48239	65890	65307	60918	52322	2369.22	3130.3	3855.07	3448.58	3313.01	2982.29	3532.45	4183.04	2861.6	2415.95	2461.2	2123.03	0.490056	0.0275687	0.34885	0.165842	0.455329	0.801087	-0.801295	0.000334132	0.00224346	-0.477082	0.0320756	0.342325
ssc-miR-30d	209014	477825	371463	179037	209567	255981	341767	244777	364462	334230	373076	332486	16445.3	19649.7	18315.5	13534	14889.8	15975.9	17561.1	21225.8	15828.5	12364.4	15072.9	13491	0.32969	0.0728236	0.488958	-0.181721	0.322507	0.624145	-0.628859	0.00064555	0.00393307	-0.117449	0.522605	1
ssc-miR-30e-3p	16232	30198	27905	40103	36960	45465	30946	25062	38023	50461	53837	48592	1277.14	1241.84	1375.89	3031.53	2626.02	2837.49	1590.11	2173.25	1651.33	1866.74	2175.11	1971.68	0.801979	4.29125e-05	0.00470608	1.23445	3.78942e-10	7.79199e-09	-0.0659114	0.735244	0.97739	-0.498382	0.0104122	0.18503
ssc-miR-30e-5p	44180	107475	80324	22284	52772	44493	70898	52901	95493	94361	120983	96362	3476.1	4419.72	3960.49	1684.53	3749.47	2776.83	3642.97	4587.3	4147.25	3490.77	4887.93	3910.01	0.402782	0.163009	0.670376	-0.417929	0.148071	0.374734	-0.239	0.407366	0.720557	0.581711	0.0443972	0.417631
ssc-miR-31	1	0	0	3	0	0	0	0	0	0	0	0	0.0786803	0	0	0.226781	0	0	0	0	0	0	0	0	-0.249479	1	1	0.438632	1	1	2.56274e-15	1	1	-0.682347	1	1
ssc-miR-32	142	416	367	34	104	264	259	172	285	306	313	326	11.1726	17.1073	18.0954	2.57018	7.38924	16.4764	13.3083	14.915	12.3775	11.3201	12.6458	13.2279	0.131785	0.813645	1	-0.692897	0.15441	0.379813	-0.33748	0.447023	0.774007	0.486717	0.325141	1
ssc-miR-320	13630	35445	23981	14809	14575	10437	35464	16954	24956	20274	22726	20461	1072.41	1457.61	1182.42	1119.46	1035.56	651.379	1822.26	1470.16	1083.84	750.011	918.171	830.231	0.550979	0.0273701	0.34885	-0.290121	0.245793	0.525103	-1.00878	6.14437e-05	0.000561527	-0.167686	0.503753	1
ssc-miR-323	9483	20941	15937	4595	3154	2551	15814	10629	15779	5960	6649	5091	746.126	861.161	785.796	347.352	224.093	159.209	812.575	921.693	685.28	220.483	268.631	206.574	0.338471	0.200115	0.765555	-1.59916	4.66269e-09	8.07382e-08	-2.00828	3.51868e-13	1.92941e-11	-0.0707118	0.799848	1
ssc-miR-324	5	25	16	0	6	4	18	6	15	2	10	8	0.393402	1.02808	0.788902	0	0.426302	0.249642	0.924899	0.520289	0.651448	0.0739875	0.404018	0.32461	0.2108	1	1	-1.21504	1	1	-1.23201	1	1	0.164182	1	1
ssc-miR-326	23	48	58	20	32	27	16	13	17	33	61	67	1.80965	1.97391	2.85977	1.51187	2.27361	1.68508	0.822132	1.12729	0.738308	1.22079	2.46451	2.71861	-0.902893	0.525634	1	-0.159425	1	1	0.954143	0.525634	0.809211	0.213711	1	1
ssc-miR-328	1637	4447	4538	817	2824	5138	1826	1235	1796	3522	3581	3181	128.8	182.875	223.752	61.7599	200.646	320.665	93.8259	107.093	78.0001	130.292	144.679	129.073	-0.623635	0.15123	0.654669	0.229953	0.594949	0.923293	0.324824	0.461153	0.782059	-0.52875	0.219453	0.858837
ssc-miR-331-3p	113	233	336	109	147	257	187	124	232	306	324	384	8.89088	9.58171	16.5669	8.23969	10.4444	16.0395	9.60867	10.7526	10.0757	11.3201	13.0902	15.5813	0.120043	0.841857	1	0.0940485	0.924423	1	0.175544	0.775914	1	0.201746	0.717331	1
ssc-miR-331-5p	120	263	363	178	156	321	208	131	226	302	298	305	9.44164	10.8154	17.8982	13.4556	11.0839	20.0338	10.6877	11.3597	9.81516	11.1721	12.0397	12.3758	0.0614675	0.923934	1	0.329508	0.496409	0.814941	-0.0538282	1	1	-0.321769	0.489035	1
ssc-miR-335	299	1120	602	55	59	56	595	338	513	155	150	160	23.5254	46.058	29.6824	4.15764	4.19197	3.49499	30.573	29.3096	22.2795	5.73403	6.06027	6.49221	0.0508901	0.923715	1	-2.91465	2.58295e-10	6.06994e-09	-2.35149	3.89152e-08	8.00194e-07	0.610867	0.412888	1
ssc-miR-338	43	131	160	27	35	92	78	44	70	83	80	58	3.38325	5.38714	7.88902	2.04102	2.48676	5.74177	4.0079	3.81546	3.04009	3.07048	3.23214	2.35342	-0.288095	0.731862	1	-0.571738	0.492418	0.814941	-0.518616	0.539472	0.825518	-0.237151	1	1
ssc-miR-339	993	2826	1699	1117	501	1032	1945	967	1747	773	1382	961	78.1296	116.214	83.7716	84.438	35.5963	64.4077	99.9405	83.8533	75.872	28.5962	55.8353	38.9938	0.230395	0.486364	1	-0.477025	0.154696	0.379813	-1.28529	0.000174751	0.00133705	-0.578083	0.0967667	0.614777
ssc-miR-339-3p	1	7	2	1	1	1	4	1	3	4	7	2	0.0786803	0.287862	0.0986128	0.0755935	0.0710504	0.0624105	0.205533	0.0867149	0.13029	0.147975	0.282812	0.0811526	0.10031	1	1	-0.473719	1	1	0.0363432	1	1	0.602734	1	1
ssc-miR-339-5p	993	2826	1699	1117	501	1032	1945	967	1747	773	1382	961	78.1296	116.214	83.7716	84.438	35.5963	64.4077	99.9405	83.8533	75.872	28.5962	55.8353	38.9938	0.230395	0.486364	1	-0.477025	0.154696	0.379813	-1.28529	0.000174751	0.00133705	-0.578083	0.0967667	0.614777
ssc-miR-340	1650	4190	2926	1575	2617	4510	3158	1848	3626	4056	5587	6045	129.823	172.306	144.271	119.06	185.939	281.471	162.268	160.249	157.477	150.047	225.725	245.284	0.443324	0.162653	0.670376	0.506299	0.109959	0.289412	0.145555	0.649565	0.917196	0.0826118	0.794214	1
ssc-miR-342	27	94	90	82	27	20	68	32	103	78	133	126	2.12437	3.86558	4.43758	6.19867	1.91836	1.24821	3.49406	2.77488	4.47328	2.88551	5.37344	5.11261	0.360611	0.692941	1	-0.0424495	1	1	0.0934993	1	1	0.497041	0.563947	1
ssc-miR-345-3p	752	1927	1850	1053	1081	1275	698	364	970	1364	1770	1419	59.1676	79.2444	91.2168	79.6	76.8055	79.5734	35.8655	31.5642	42.127	50.4595	71.5111	57.5777	-0.723829	0.0169478	0.290597	0.148041	0.608085	0.931895	0.478254	0.11813	0.262599	-0.393566	0.174206	0.785354
ssc-miR-345-5p	1	6	2	3	1	2	2	0	6	4	5	3	0.0786803	0.246739	0.0986128	0.226781	0.0710504	0.124821	0.102767	0	0.260579	0.147975	0.202009	0.121729	0.0525259	1	1	0.0568541	1	1	0.0857842	1	1	0.086113	1	1
ssc-miR-34a	6	7	22	9	10	7	22	5	11	32	71	49	0.472082	0.287862	1.08474	0.680342	0.710504	0.436874	1.13043	0.433574	0.477729	1.1838	2.86853	1.98824	0.392382	1	1	0.0809937	1	1	1.22036	0.308321	0.580394	1.54229	0.308321	0.975363
ssc-miR-34c	3	23	9	0	4	2	8	1	12	11	9	8	0.236041	0.945834	0.443758	0	0.284202	0.124821	0.411066	0.0867149	0.521159	0.406931	0.363616	0.32461	-0.270168	1	1	-1.27684	0.505234	0.814941	-0.0807594	1	1	0.907003	1	1
ssc-miR-3613	115	971	673	76	321	659	564	343	501	794	740	885	9.04824	39.9306	33.1832	5.74511	22.8072	41.1285	28.9802	29.7432	21.7584	29.373	29.8973	35.91	0.28858	0.60823	1	-0.124942	0.827318	1	0.0342875	0.974494	1	0.447832	0.418643	1
ssc-miR-361-3p	861	2480	2024	2645	2450	2330	2040	1385	1937	4878	4027	4969	67.7438	101.986	99.7961	199.945	174.074	145.417	104.822	120.1	84.1237	180.455	162.698	201.624	0.515154	0.0422026	0.385685	1.05622	1.88546e-05	0.000155079	0.609642	0.0124777	0.0432121	0.0686744	0.774535	1
ssc-miR-361-5p	174	482	399	170	123	301	382	215	494	287	427	307	13.6904	19.8214	19.6733	12.8509	8.7392	18.7856	19.6284	18.6437	21.4544	10.6172	17.2516	12.4569	0.499452	0.199236	0.765555	-0.284172	0.532031	0.845596	-0.784989	0.0464897	0.12435	-0.00177081	1	1
ssc-miR-362	237	774	710	342	329	142	373	245	502	444	662	593	18.6472	31.8294	35.0075	25.853	23.3756	8.8623	19.166	21.2451	21.8018	16.4252	26.746	24.0617	-0.123886	0.798201	1	-0.445462	0.270488	0.545954	-0.111823	0.779025	1	0.209598	0.643157	1
ssc-miR-363	2540	6969	6720	1571	2611	1625	3719	2830	6627	5014	4405	3231	199.848	286.588	331.339	118.757	185.513	101.417	191.094	245.403	287.81	185.487	177.97	131.102	0.181222	0.575501	1	-0.90271	0.00578736	0.0241018	-0.798342	0.0142646	0.0474045	0.285534	0.387395	1
ssc-miR-365-3p	19	90	74	125	75	70	91	77	115	49	131	96	1.49493	3.70109	3.64867	9.44919	5.32878	4.36874	4.67588	6.67705	4.99444	1.81269	5.29263	3.89532	1.17262	0.110204	0.563069	1.19036	0.0607308	0.175267	-0.76235	0.301414	0.57321	-0.77913	0.257456	0.858837
ssc-miR-365-5p	44	87	70	21	34	9	73	27	34	46	56	35	3.46193	3.57772	3.45145	1.58746	2.41571	0.561695	3.75098	2.3413	1.47662	1.70171	2.2625	1.42017	-0.145431	1	1	-1.03183	0.333724	0.634655	-0.660111	0.602704	0.900226	0.22144	1	1
ssc-miR-369	3084	6180	5483	729	387	605	4960	2699	7169	789	925	712	242.65	254.141	270.347	55.1077	27.4965	37.7584	254.861	234.044	311.349	29.1881	37.3716	28.8903	0.417634	0.137527	0.637273	-2.55852	3.97324e-16	2.59967e-14	-3.30905	1.97139e-24	3.24293e-22	-0.3334	0.336003	1
ssc-miR-370	25762	46505	45572	5748	6888	734	37110	10567	39207	17468	14272	10396	2026.96	1912.43	2246.99	434.512	489.395	45.8093	1906.83	916.316	1702.76	646.207	576.614	421.831	-0.0940523	0.869028	1	-2.56439	2.06724e-05	0.000165884	-1.70838	0.00347079	0.0149788	0.761919	0.184739	0.821339
ssc-miR-371-5p	0	4	0	0	0	0	0	2	0	0	0	0	0	0.164493	0	0	0	0	0	0.17343	0	0	0	0	0.12428	1	1	-0.508104	1	1	-0.583495	1	1	-2.56274e-15	1	1
ssc-miR-374a-3p	2235	4927	3938	1184	2392	4105	4758	2748	4542	6167	6281	6348	175.851	202.614	194.169	89.5027	169.953	256.195	244.482	238.293	197.259	228.14	253.764	257.578	0.572812	0.0626707	0.460508	-0.0399013	0.903794	1	-0.0929145	0.763289	1	0.519804	0.0926666	0.614777
ssc-miR-374a-5p	1862	4524	4180	1313	1309	4170	3819	2043	3617	3407	4004	3531	146.503	186.041	206.101	99.2543	93.005	260.252	196.233	177.159	157.086	126.038	161.769	143.275	0.303081	0.396068	1	-0.142287	0.691606	0.997461	-0.515277	0.147144	0.312326	-0.0699343	0.846725	1
ssc-miR-374b-3p	38	86	63	13	37	41	85	49	55	50	83	63	2.98985	3.5366	3.1063	0.982716	2.62887	2.55883	4.36758	4.24903	2.38864	1.84969	3.35335	2.55631	0.49348	0.538243	1	-0.506053	0.629806	0.937572	-0.683692	0.397138	0.7101	0.313541	0.802563	1
ssc-miR-374b-5p	219	657	654	335	199	358	628	376	929	319	431	426	17.231	27.0179	32.2464	25.3238	14.139	22.343	32.2687	32.6048	40.3464	11.801	17.4132	17.2855	0.799922	0.0247394	0.339136	-0.197516	0.610829	0.931895	-1.40463	0.000216926	0.00162202	-0.407661	0.305485	0.975363
ssc-miR-376a-3p	169	411	331	29	35	5	317	143	444	79	66	39	13.297	16.9016	16.3204	2.19221	2.48676	0.312053	16.2885	12.4002	19.2829	2.92251	2.66652	1.58248	0.383562	0.365482	1	-3.02046	5.77027e-07	6.2105e-06	-2.9042	1.60621e-07	2.9358e-06	0.491952	0.785663	1
ssc-miR-376a-5p	35	106	54	1	4	13	42	26	47	8	7	6	2.75381	4.35906	2.66255	0.0755935	0.284202	0.811337	2.1581	2.25459	2.0412	0.29595	0.282812	0.243458	-0.261674	0.817308	1	-2.61786	0.0277033	0.0922914	-2.68585	0.0809269	0.195772	-0.368975	1	1
ssc-miR-376b	27	70	85	4	5	7	54	22	63	11	15	4	2.12437	2.87862	4.19104	0.302374	0.355252	0.436874	2.7747	1.90773	2.73608	0.406931	0.606027	0.162305	0.0154321	1	1	-2.609	0.0277716	0.0922914	-2.51444	0.0474903	0.126002	0.0771877	1	1
ssc-miR-376c	33	81	106	5	5	8	75	26	85	16	18	9	2.59645	3.33098	5.22648	0.377968	0.355252	0.499284	3.85375	2.25459	3.69154	0.5919	0.727232	0.365187	0.135406	1	1	-2.7471	0.00947866	0.0365963	-2.49847	0.0162121	0.0522919	0.357345	1	1
ssc-miR-378	388501	727499	572092	656312	520689	432890	435647	344296	519454	1015305	957023	778216	30567.4	29917.1	28207.8	49612.9	36995.2	27016.9	22385	29855.6	22559.8	37559.9	38665.4	31577.1	0.0823388	0.733628	1	0.469182	0.0529353	0.155498	0.310953	0.199075	0.399363	-0.0758897	0.753757	1
ssc-miR-378b-3p	134543	228876	172951	184507	122376	112329	131973	107148	173151	267806	264082	195857	10585.9	9412.12	8527.59	13947.5	8694.87	7010.51	6781.21	9291.33	7519.93	9907.15	10669.4	7947.15	0.060896	0.823347	1	0.168421	0.536872	0.849188	0.0515115	0.850335	1	-0.0560131	0.837328	1
ssc-miR-381	13	20	19	0	4	0	21	17	25	3	3	3	1.02284	0.822464	0.936821	0	0.284202	0	1.07905	1.47415	1.08575	0.110981	0.121205	0.121729	0.635226	0.696748	1	-2.18698	0.257623	0.535956	-2.60943	0.132661	0.287141	0.145031	1	1
ssc-miR-382	9731	22394	19152	4015	2577	2136	24081	12489	20345	4861	3864	3123	765.638	920.913	944.316	303.508	183.097	133.309	1237.36	1082.98	883.581	179.827	156.112	126.72	0.604045	0.032676	0.354501	-1.9746	2.38204e-11	7.12445e-10	-3.00037	1.84356e-22	2.02177e-20	-0.421823	0.153464	0.742496
ssc-miR-411	19153	36590	30876	1571	1393	574	23278	8808	25973	2638	3551	1960	1506.96	1504.7	1522.38	118.757	98.9732	35.8236	1196.1	763.785	1128	97.5895	143.467	79.5295	-0.200635	0.589473	1	-4.04778	1.40247e-21	2.30707e-19	-3.50898	2.09142e-17	1.7202e-15	0.33797	0.392376	1
ssc-miR-421-3p	133	337	342	46	38	66	198	116	186	106	111	94	10.4645	13.8585	16.8628	3.4773	2.69992	4.1191	10.1739	10.0589	8.07796	3.92134	4.4846	3.81417	-0.217046	0.698596	1	-1.85401	0.000598766	0.00307803	-1.39441	0.0126948	0.0434164	0.239125	0.844683	1
ssc-miR-421-5p	1	0	0	0	0	0	0	0	0	0	0	0	0.0786803	0	0	0	0	0	0	0	0	0	0	0	-0.249479	1	1	-0.265429	1	1	2.56274e-15	1	1	-2.56274e-15	1	1
ssc-miR-423-3p	27534	70646	69823	23142	34745	40141	40431	23225	39117	57414	58192	54358	2166.38	2905.19	3442.72	1749.39	2468.65	2505.22	2077.48	2013.95	1698.85	2123.96	2351.06	2205.65	-0.233371	0.317301	0.975628	-0.233097	0.317524	0.618139	-0.00889255	0.970239	1	-0.00916733	0.969359	1
ssc-miR-423-5p	56423	111290	92962	41257	70796	57825	51779	27965	29085	122339	98454	99483	4439.38	4576.6	4583.62	3118.76	5030.09	3608.89	2660.57	2424.98	1263.16	4525.78	3977.72	4036.65	-0.806382	0.00130946	0.0538514	-0.099142	0.690969	0.997461	0.800179	0.00142703	0.00745228	0.0929408	0.709455	1
ssc-miR-424-3p	4643	10157	8674	1959	1445	1825	3954	2481	4033	3172	3277	3253	365.313	417.688	427.684	148.088	102.668	113.899	203.169	215.14	175.153	117.344	132.397	131.995	-0.703212	0.0010203	0.0479543	-1.61988	2.19572e-13	1.03199e-11	-0.850601	0.000135443	0.00111402	0.0659755	0.784586	1
ssc-miR-424-5p	192	620	458	46	89	132	366	177	244	181	281	202	15.1066	25.4964	22.5823	3.4773	6.32349	8.23819	18.8063	15.3485	10.5969	6.69587	11.3529	8.19641	-0.179377	0.72222	1	-1.67697	0.000219792	0.00122562	-0.964332	0.035691	0.0992129	0.531719	0.36518	1
ssc-miR-425-3p	157	409	398	237	215	366	273	138	268	321	506	572	12.3528	16.8194	19.6239	17.9157	15.2758	22.8423	14.0276	11.9667	11.6392	11.875	20.4433	23.2096	-0.0493798	0.933724	1	0.307338	0.470143	0.805609	0.343455	0.430598	0.74956	-0.0129954	1	1
ssc-miR-425-5p	288	567	921	472	404	666	439	294	546	840	761	780	22.6599	23.3169	45.4112	35.6801	28.7044	41.5654	22.5573	25.4942	23.7127	31.0747	30.7457	31.6495	-0.0241017	1	1	0.316888	0.358287	0.672545	0.160765	0.686035	0.943185	-0.180128	0.601582	1
ssc-miR-429	0	0	1	2	0	0	0	0	2	1	6	2	0	0	0.0493064	0.151187	0	0	0	0	0.0868598	0.0369937	0.242411	0.0811526	0.173266	1	1	0.333265	1	1	0.600769	1	1	0.483261	1	1
ssc-miR-432-3p	2	1	4	0	0	0	4	1	7	1	0	0	0.157361	0.0411232	0.197226	0	0	0	0.205533	0.0867149	0.304009	0.0369937	0	0	0.517721	1	1	-1.01158	1	1	-1.31522	1	1	0.135732	1	1
ssc-miR-432-5p	20481	36357	39442	3128	4024	2358	21291	11877	22460	11288	8567	7272	1611.45	1495.12	1944.74	236.457	285.907	147.164	1094	1029.91	975.435	417.585	346.122	295.071	-0.374619	0.154814	0.659245	-2.80761	4.37865e-23	1.44057e-20	-1.77205	7.36557e-11	2.69253e-09	0.660888	0.0150972	0.221949
ssc-miR-4331	4	10	14	53	4	26	45	15	64	7	13	13	0.314721	0.411232	0.690289	4.00646	0.284202	1.62267	2.31225	1.30072	2.77951	0.258956	0.525223	0.527492	2.20439	0.0820115	0.505077	1.90814	0.13883	0.354071	-2.19289	0.0820115	0.196947	-1.8985	0.13883	0.736008
ssc-miR-4332	0	0	0	115	3	1	38	13	140	0	0	1	0	0	0	8.69325	0.213151	0.0624105	1.95256	1.12729	6.08018	0	0	0.0405763	4.8803	0.00591481	0.176907	4.69373	0.00967779	0.0365963	-4.68287	0.00591481	0.0234455	-4.49083	0.00967779	0.18503
ssc-miR-4334-3p	754	2092	1105	893	344	747	1422	650	1264	534	1010	719	59.325	86.0298	54.4836	67.505	24.4413	46.6207	73.067	56.3647	54.8954	19.7547	40.8058	29.1743	0.21611	0.550109	1	-0.411184	0.257235	0.535956	-1.25174	0.0008839	0.00510181	-0.624727	0.102578	0.614777
ssc-miR-4337	1	0	0	0	1	0	0	0	0	0	0	0	0.0786803	0	0	0	0.0710504	0	0	0	0	0	0	0	-0.249479	1	1	-0.00589492	1	1	2.56274e-15	1	1	-0.250316	1	1
ssc-miR-4338	0	1	1	1	0	0	0	1	0	0	0	0	0	0.0411232	0.0493064	0.0755935	0	0	0	0.0867149	0	0	0	0	0.0501605	1	1	-0.026566	1	1	-0.32109	1	1	-0.264936	1	1
ssc-miR-450a	19429	49255	48786	10101	11609	11588	34216	23033	32374	19015	22854	18625	1528.68	2025.52	2405.46	763.57	824.824	723.213	1758.13	1997.3	1406	703.436	923.342	755.733	0.106987	0.633111	1	-1.25857	3.19698e-08	5.12677e-07	-1.32196	6.66995e-09	1.77578e-07	0.0435797	0.849017	1
ssc-miR-450b-3p	45	153	101	41	47	65	115	54	94	67	56	70	3.54062	6.29185	4.97995	3.09933	3.33937	4.05668	5.90908	4.6826	4.08241	2.47858	2.2625	2.84034	0.302074	0.740288	1	-0.373691	0.717479	1	-1.12306	0.124297	0.274454	-0.450212	0.827256	1
ssc-miR-450b-5p	10163	23236	13665	7883	6827	4149	19343	11974	17339	9681	12189	11065	799.628	955.539	673.772	595.904	485.061	258.941	993.907	1038.32	753.031	358.136	492.457	448.977	0.519577	0.0686875	0.470796	-0.742506	0.00978867	0.0365963	-1.30615	6.62327e-06	7.78234e-05	-0.0440848	0.880973	1
ssc-miR-450c-3p	150	703	489	138	148	171	431	212	467	266	229	270	11.8021	28.9096	24.1108	10.4319	10.5155	10.6722	22.1462	18.3836	20.2818	9.84034	9.25201	10.9556	0.239214	0.576322	1	-0.9158	0.0303227	0.0978056	-1.22667	0.00307003	0.0140283	-0.0726675	0.918137	1
ssc-miR-450c-5p	19648	50058	49611	10251	11850	11734	34888	23434	32976	19330	23201	18962	1545.91	2058.55	2446.14	774.909	841.947	732.325	1792.66	2032.08	1432.14	715.089	937.362	769.407	0.111575	0.61982	1	-1.25718	3.69797e-08	5.53014e-07	-1.32479	7.01675e-09	1.77578e-07	0.0439491	0.84821	1
ssc-miR-451	543	1477	1334	1651	1037	7851	779	546	761	1672	3157	2445	42.7234	60.739	65.7747	124.805	73.6793	489.985	40.0276	47.3463	33.0501	61.8535	127.548	99.209	-0.17361	0.767096	1	2.13096	0.000121283	0.000738928	1.05115	0.0555622	0.143937	-1.25318	0.0200272	0.259568
ssc-miR-452	32	148	26	31	5	0	77	21	14	22	54	34	2.51777	6.08624	1.28197	2.3434	0.355252	0	3.95651	1.82101	0.608018	0.813862	2.1817	1.37959	-0.297571	0.819248	1	-1.63301	0.172321	0.407868	-0.699214	0.572297	0.867677	0.62802	1	1
ssc-miR-455-3p	73	251	218	85	68	61	139	70	122	135	140	145	5.74366	10.3219	10.7488	6.42545	4.83143	3.80704	7.14228	6.07004	5.29845	4.99416	5.65625	5.88356	-0.208538	0.799245	1	-0.707657	0.22974	0.506978	-0.366757	0.551792	0.840461	0.131217	0.875366	1
ssc-miR-455-5p	907	3330	3229	509	784	638	2350	1179	1486	1660	1530	1600	71.3631	136.94	159.21	38.4771	55.7035	39.8179	120.751	102.237	64.5368	61.4096	61.8147	64.9221	-0.051815	0.874266	1	-1.34553	4.00223e-05	0.000292608	-0.805053	0.0128006	0.0434164	0.488479	0.148966	0.742071
ssc-miR-486	22231	34787	54375	104071	109324	62489	22923	27984	29805	111274	111399	95467	1749.14	1430.55	2681.04	7867.09	7767.52	3899.97	1177.86	2426.63	1294.43	4116.44	4500.72	3873.7	0.043476	0.901322	1	1.83872	2.89338e-07	3.39972e-06	1.15009	0.00108902	0.00597144	-0.645142	0.064281	0.503534
ssc-miR-487b	135	428	361	25	23	13	287	168	379	66	36	17	10.6218	17.6007	17.7996	1.88984	1.63416	0.811337	14.747	14.5681	16.4599	2.44159	1.45446	0.689797	0.323366	0.440714	1	-3.19417	5.16491e-07	5.8595e-06	-3.43168	2.82579e-08	6.19791e-07	0.0747572	1	1
ssc-miR-489	63	224	356	52	94	43	119	61	190	240	169	113	4.95686	9.2116	17.5531	3.93086	6.67874	2.68365	6.11461	5.28961	8.25168	8.8785	6.8279	4.58512	-0.352773	0.587458	1	-1.12771	0.0517995	0.153532	-0.177287	0.798999	1	0.596466	0.377265	1
ssc-miR-490	12	63	34	12	9	26	28	23	40	27	7	39	0.944164	2.59076	1.67642	0.907122	0.639454	1.62267	1.43873	1.99444	1.7372	0.998831	0.282812	1.58248	0.292414	1	1	-0.553931	0.736786	1	-0.968934	0.526216	0.809211	-0.129879	1	1
ssc-miR-490-3p	12	63	34	12	9	26	28	23	40	27	7	39	0.944164	2.59076	1.67642	0.907122	0.639454	1.62267	1.43873	1.99444	1.7372	0.998831	0.282812	1.58248	0.292414	1	1	-0.553931	0.736786	1	-0.968934	0.526216	0.809211	-0.129879	1	1
ssc-miR-490-5p	0	7	0	0	0	0	0	0	0	0	0	0	0	0.287862	0	0	0	0	0	0	0	0	0	0	-0.757381	1	1	-0.798063	1	1	2.56274e-15	1	1	-2.56274e-15	1	1
ssc-miR-491	7	24	21	12	10	14	13	14	21	21	22	20	0.550762	0.986957	1.03543	0.907122	0.710504	0.873747	0.667983	1.21401	0.912028	0.776869	0.888839	0.811526	0.387994	1	1	0.0565661	1	1	-0.337297	1	1	-0.00713476	1	1
ssc-miR-493-3p	4517	7570	7432	668	685	173	7011	2336	7316	1613	1016	1034	355.399	311.303	366.445	50.4965	48.6695	10.797	360.248	202.566	317.733	59.6709	41.0482	41.9559	0.119505	0.765523	1	-3.1189	1.98321e-12	7.24973e-11	-2.86341	5.3857e-11	2.21487e-09	0.374589	0.396769	1
ssc-miR-493-5p	13105	20873	22564	1823	1164	684	23293	12929	31294	2137	2489	1865	1031.11	858.365	1112.55	137.807	82.7027	42.6888	1196.87	1121.14	1359.09	79.0556	100.56	75.6748	0.642398	0.0592662	0.460508	-3.40236	2.49047e-19	2.73122e-17	-4.08849	9.81182e-26	3.22809e-23	-0.0439481	0.913854	1
ssc-miR-497	20	73	59	43	61	57	60	45	88	182	271	146	1.57361	3.00199	2.90908	3.25052	4.33408	3.5574	3.083	3.90217	3.82183	6.73286	10.9489	5.92414	0.82177	0.396607	1	0.658271	0.396607	0.720904	0.891237	0.174209	0.358217	1.05812	0.073537	0.52595
ssc-miR-499-3p	7	13	17	0	1	3	5	0	5	6	5	3	0.550762	0.534602	0.838209	0	0.0710504	0.187232	0.256916	0	0.217149	0.221962	0.202009	0.121729	-1.21241	1	1	-1.79095	0.505264	0.814941	-0.00533609	1	1	0.539883	1	1
ssc-miR-499-5p	11056	22182	17073	6566	7469	19601	8294	4208	17783	9922	12763	12982	869.89	912.195	841.808	496.347	530.676	1223.31	426.173	364.896	772.314	367.052	515.648	526.761	-0.350141	0.389077	1	-0.109584	0.787367	1	-0.434284	0.285263	0.54884	-0.67485	0.0973024	0.614777
ssc-miR-500	1262	3177	1800	1720	1269	494	2694	1450	3420	1656	1779	1787	99.2946	130.648	88.7515	130.021	90.163	30.8308	138.427	125.737	148.53	61.2616	71.8748	72.5098	0.725129	0.0617691	0.460508	-0.228399	0.563936	0.887727	-1.24056	0.00165798	0.00839195	-0.287132	0.478898	1
ssc-miR-503	1955	3866	3656	2782	1394	2008	1754	1235	1934	2187	2241	2537	153.82	158.982	180.264	210.301	99.0443	125.32	90.1263	107.093	83.9934	80.9053	90.5404	102.942	-0.48539	0.0919347	0.540116	-0.0725926	0.807572	1	-0.250128	0.402357	0.715543	-0.662964	0.0213494	0.259568
ssc-miR-504	1549	2557	2747	733	1038	994	1920	1038	2104	1825	1574	1722	121.876	105.152	135.445	55.41	73.7503	62.0361	98.6559	90.0101	91.3765	67.5136	63.5924	69.8724	-0.0406779	0.880782	1	-0.813299	0.00110692	0.00535553	-0.700651	0.00546918	0.0222143	0.0718468	0.796877	1
ssc-miR-505	72	278	217	227	217	315	256	133	288	292	355	295	5.66498	11.4323	10.6995	17.1597	15.4179	19.6593	13.1541	11.5331	12.5078	10.8022	14.3426	11.97	0.740815	0.0997821	0.55779	1.01145	0.0202502	0.0716379	-0.218749	0.639304	0.910524	-0.488893	0.246111	0.858837
ssc-miR-532-3p	72	183	254	89	54	51	120	80	208	61	131	105	5.66498	7.52555	12.5238	6.72782	3.83672	3.18294	6.16599	6.93719	9.03342	2.25662	5.29263	4.26051	0.114295	0.905359	1	-0.779274	0.170804	0.407207	-1.10419	0.0767968	0.187157	-0.212916	0.861497	1
ssc-miR-532-5p	53769	126209	74377	35519	41196	20950	72982	41518	80966	53148	73275	66898	4230.56	5190.12	3667.26	2685.01	2926.99	1307.5	3750.05	3600.23	3516.34	1966.14	2960.44	2714.47	0.0733235	0.806337	1	-0.803905	0.00753998	0.0302519	-0.734128	0.0145852	0.0479854	0.143097	0.632933	1
ssc-miR-542-3p	7015	14096	8094	2949	2068	1424	11078	6471	10268	3771	4992	3956	551.943	579.673	399.086	222.925	146.932	88.8726	569.224	561.132	445.938	139.503	201.686	160.52	0.369531	0.214547	0.793102	-1.62186	1.44524e-07	1.82879e-06	-1.8622	1.86612e-09	5.58138e-08	0.129104	0.680838	1
ssc-miR-542-5p	14	48	46	2	8	6	28	14	25	18	12	17	1.10152	1.97391	2.26809	0.151187	0.568403	0.374463	1.43873	1.21401	1.08575	0.665887	0.484821	0.689797	-0.177856	1	1	-1.86744	0.2325	0.506978	-1.07673	0.696493	0.943185	0.592749	1	1
ssc-miR-545-3p	18	46	71	0	1	5	26	13	29	24	33	12	1.41625	1.89167	3.50075	0	0.0710504	0.312053	1.33597	1.12729	1.25947	0.88785	1.33326	0.486915	-0.51028	0.765499	1	-3.16474	0.0190615	0.0681657	-0.600509	0.696586	0.943185	2.02388	0.257485	0.858837
ssc-miR-545-5p	0	6	4	0	3	4	3	1	3	3	1	7	0	0.246739	0.197226	0	0.213151	0.249642	0.15415	0.0867149	0.13029	0.110981	0.0404018	0.284034	0.0337644	1	1	0.0939475	1	1	0.00978193	1	1	-0.0479301	1	1
ssc-miR-551a	4	13	9	0	2	0	8	4	1	2	0	4	0.314721	0.534602	0.443758	0	0.142101	0	0.411066	0.34686	0.0434299	0.0739875	0	0.162305	-0.270139	1	1	-1.6315	1	1	-1.05704	1	1	0.241418	1	1
ssc-miR-574	275	1129	672	346	280	310	748	292	402	493	653	535	21.6371	46.4281	33.1339	26.1554	19.8941	19.3473	38.4347	25.3207	17.4588	18.2379	26.3824	21.7083	-0.00446008	1	1	-0.513543	0.167759	0.40423	-0.488519	0.195248	0.39409	0.0202965	1	1
ssc-miR-582	4	18	7	2	0	3	22	7	14	10	12	7	0.314721	0.740218	0.345145	0.151187	0	0.187232	1.13043	0.607004	0.608018	0.369937	0.484821	0.284034	0.882982	0.632634	1	-1.24449	1	1	-1.01617	0.632634	0.908912	1.08535	1	1
ssc-miR-615	89	318	255	128	136	146	211	87	330	283	226	269	7.00255	13.0772	12.5731	9.67597	9.66286	9.11194	10.8419	7.5442	14.3319	10.4692	9.1308	10.915	0.341136	0.491077	1	-0.0864193	1	1	-0.327582	0.481969	0.785921	0.0997834	0.832208	1
ssc-miR-628	54	129	138	38	49	101	97	63	92	81	87	67	4.24874	5.30489	6.80428	2.87255	3.48147	6.30346	4.98418	5.46304	3.99555	2.99649	3.51495	2.71861	0.13813	1	1	-0.252877	0.740609	1	-0.82929	0.252133	0.496717	-0.440246	0.558871	1
ssc-miR-652	0	0	0	0	0	0	1	0	2	0	1	1	0	0	0	0	0	0	0.0513833	0	0.0868598	0	0.0404018	0.0405763	0.501026	1	1	-2.56274e-15	1	1	-0.218879	1	1	0.282074	1	1
ssc-miR-664-3p	6	28	22	47	18	30	42	34	49	25	41	40	0.472082	1.15145	1.08474	3.5529	1.27891	1.87232	2.1581	2.94831	2.12806	0.924844	1.65647	1.62305	1.59892	0.126086	0.601194	1.301	0.366318	0.674082	-0.930161	0.413937	0.728264	-0.628421	0.56915	1
ssc-miR-664-5p	259	508	352	274	389	617	451	253	344	656	640	692	20.3782	20.8906	17.3559	20.7126	27.6386	38.5073	23.1739	21.9389	14.9399	24.2679	25.8571	28.0788	0.351111	0.372645	1	0.676055	0.0515732	0.153532	0.173933	0.623193	0.908912	-0.150742	0.66927	1
ssc-miR-671-3p	194	569	341	271	287	194	444	183	231	353	355	331	15.264	23.3991	16.8135	20.4858	20.3915	12.1076	22.8142	15.8688	10.0323	13.0588	14.3426	13.4307	0.125928	0.769548	1	0.0467205	0.943593	1	-0.451847	0.328322	0.613292	-0.372862	0.388919	1
ssc-miR-671-5p	5	33	31	22	7	3	26	17	31	5	23	30	0.393402	1.35707	1.5285	1.66306	0.497353	0.187232	1.33597	1.47415	1.34633	0.184969	0.929241	1.21729	0.604248	0.737072	1	-0.326492	1	1	-0.932388	0.696638	0.943185	-0.0085799	1	1
ssc-miR-676-3p	3337	8105	7372	2181	2454	2009	3609	2183	4134	3756	3326	2658	262.556	333.304	363.487	164.869	174.358	125.383	185.442	189.299	179.539	138.949	134.376	107.852	-0.458087	0.0550003	0.460417	-0.936229	9.11931e-05	0.00058386	-0.763377	0.00186897	0.00931653	-0.285306	0.245993	0.858837
ssc-miR-676-5p	13	15	10	5	10	2	8	8	15	3	4	7	1.02284	0.616848	0.493064	0.377968	0.710504	0.124821	0.411066	0.693719	0.651448	0.110981	0.161607	0.284034	0.0367004	1	1	-0.568687	1	1	-1.34543	0.505161	0.802889	-0.76966	1	1
ssc-miR-6782-3p	2	19	13	14	2	4	19	15	28	42	7	33	0.157361	0.781341	0.640983	1.05831	0.142101	0.249642	0.976282	1.30072	1.21604	1.55374	0.282812	1.33902	1.26262	0.387479	1	-0.0094739	1	1	-0.31464	1	1	0.960112	0.632487	1
ssc-miR-7	3035	9611	7589	5090	5770	3231	6508	4750	7919	12489	12484	12702	238.795	395.235	374.186	384.771	409.961	201.648	334.402	411.896	343.921	462.015	504.376	515.4	0.444821	0.128996	0.606283	0.0938347	0.751795	1	0.221399	0.449347	0.774007	0.572395	0.0501501	0.434194
ssc-miR-708-3p	364	602	516	245	291	445	811	349	586	715	558	672	28.6396	24.7562	25.4421	18.5204	20.6757	27.7727	41.6718	30.2635	25.4499	26.4505	22.5442	27.2673	0.621709	0.0559777	0.460417	-0.123531	0.765813	1	-0.558626	0.0832004	0.198355	0.186496	0.62834	1
ssc-miR-708-5p	261	702	620	307	218	278	651	283	643	599	834	705	20.5356	28.8685	30.57	23.2072	15.489	17.3501	33.4505	24.5403	27.9254	22.1593	33.6951	28.6063	0.43228	0.210785	0.788049	-0.400235	0.270229	0.545954	-0.243978	0.474497	0.785921	0.588429	0.106511	0.614777
ssc-miR-7134-3p	2845	22495	16366	51778	46177	61628	19777	11042	18272	49071	49049	66031	223.846	925.067	806.948	3914.08	3280.9	3846.24	1016.21	957.506	793.551	1815.32	1981.67	2679.29	0.824977	0.0355578	0.354501	2.60815	2.43195e-10	6.06994e-09	1.01353	0.00985008	0.0358572	-0.769627	0.048661	0.432688
ssc-miR-7134-5p	931	2219	2575	1769	3650	6474	1341	777	1140	4232	3220	4105	73.2514	91.2524	126.964	133.725	259.334	404.046	68.905	67.3775	49.5101	156.558	130.094	166.566	-0.336721	0.373115	1	1.55601	1.86088e-05	0.000155079	1.07855	0.00350568	0.0149788	-0.814053	0.0220909	0.259568
ssc-miR-7135-3p	8	31	16	16	17	49	66	20	58	133	98	82	0.629443	1.27482	0.788902	1.2095	1.20786	3.05812	3.3913	1.7343	2.51893	4.92017	3.95937	3.32726	1.68465	0.125686	0.601194	1.03274	0.525373	0.839067	0.44422	0.674152	0.935849	1.10471	0.174258	0.785354
ssc-miR-7135-5p	0	0	0	1	0	5	20	6	14	23	29	19	0	0	0	0.0755935	0	0.312053	1.02767	0.520289	0.608018	0.850856	1.17165	0.770949	2.90131	0.50516	1	1.05333	1	1	0.140904	1	1	2.05469	0.257741	0.858837
ssc-miR-7136-3p	3	5	5	0	0	2	0	1	2	0	1	0	0.236041	0.205616	0.246532	0	0	0.124821	0	0.0867149	0.0868598	0	0.0404018	0	-0.801557	1	1	-1.03933	1	1	-0.446514	1	1	-0.266904	1	1
ssc-miR-7136-5p	59	53	114	10	9	16	35	23	30	19	14	16	4.64214	2.17953	5.62093	0.755935	0.639454	0.998568	1.79841	1.99444	1.3029	0.702881	0.565625	0.649221	-0.924458	0.370008	1	-2.11054	0.0488114	0.14733	-1.44054	0.468645	0.78266	-0.272279	1	1
ssc-miR-7137-3p	40	94	111	81	76	67	50	28	68	107	113	84	3.14721	3.86558	5.47301	6.12307	5.39983	4.18151	2.56916	2.42802	2.95323	3.95833	4.5654	3.40841	-0.314145	0.837221	1	0.429806	0.611822	0.931895	0.357185	0.837221	1	-0.385719	0.611822	1
ssc-miR-7137-5p	25	63	59	51	37	53	35	11	37	30	78	59	1.96701	2.59076	2.90908	3.85527	2.62887	3.30776	1.79841	0.953864	1.60691	1.10981	3.15134	2.394	-0.423713	0.78605	1	0.481188	0.653941	0.964782	0.370904	1	1	-0.532251	0.653941	1
ssc-miR-7138-3p	39	99	99	43	66	20	54	52	95	126	75	74	3.06853	4.0712	4.88133	3.25052	4.68933	1.24821	2.7747	4.50917	4.12584	4.66121	3.03013	3.00264	0.243109	0.85401	1	-0.267285	0.846509	1	-0.298592	0.846509	1	0.210979	0.837964	1
ssc-miR-7138-5p	4	14	31	10	8	2	9	1	12	7	9	17	0.314721	0.575725	1.5285	0.755935	0.568403	0.124821	0.462449	0.0867149	0.521159	0.258956	0.363616	0.689797	-0.691124	1	1	-0.523275	1	1	0.0614839	1	1	-0.112456	1	1
ssc-miR-7139-3p	23	50	55	19	15	19	18	10	13	64	51	39	1.80965	2.05616	2.71185	1.43628	1.06576	1.1858	0.924899	0.867149	0.564589	2.3676	2.06049	1.58248	-1.05708	0.525687	1	-0.672163	0.76493	1	1.03525	0.525687	0.809211	0.652328	0.76493	1
ssc-miR-7139-5p	88	174	146	128	70	48	132	46	101	171	192	177	6.92387	7.15544	7.19873	9.67597	4.97353	2.99571	6.78259	3.98889	4.38642	6.32593	7.75714	7.182	-0.162137	0.884702	1	-0.155656	0.888471	1	0.270403	0.663329	0.928661	0.26409	0.782518	1
ssc-miR-7140-3p	0	2	0	2	0	0	4	0	0	0	1	0	0	0.0822464	0	0.151187	0	0	0.205533	0	0	0	0.0404018	0	0.433052	1	1	0.228953	1	1	-0.53182	1	1	-0.341068	1	1
ssc-miR-7140-5p	0	0	0	0	0	0	0	0	0	0	1	0	0	0	0	0	0	0	0	0	0	0	0.0404018	0	0	1	1	-2.56274e-15	1	1	0.138035	1	1	0.147617	1	1
ssc-miR-7141-5p	0	0	0	0	0	1	0	0	0	0	0	3	0	0	0	0	0	0.0624105	0	0	0	0	0	0.121729	0	1	1	0.230357	1	1	0.381303	1	1	0.183471	1	1
ssc-miR-7142-3p	151	358	203	258	484	739	254	175	277	913	787	1178	11.8807	14.7221	10.0092	19.5031	34.3884	46.1214	13.0514	15.1751	12.0301	33.7753	31.7962	47.7989	0.459019	0.296303	0.966264	1.55317	7.56425e-05	0.000497727	1.27336	0.000960092	0.00544604	0.180222	0.634444	1
ssc-miR-7142-5p	0	0	0	1	0	0	0	0	0	0	0	0	0	0	0	0.0755935	0	0	0	0	0	0	0	0	0	1	1	0.274643	1	1	2.56274e-15	1	1	-0.264936	1	1
ssc-miR-7143-3p	1	11	4	4	3	2	6	6	4	5	2	2	0.0786803	0.452355	0.197226	0.302374	0.213151	0.124821	0.3083	0.520289	0.17372	0.184969	0.0808035	0.0811526	0.544137	1	1	-0.0475568	1	1	-1.0595	1	1	-0.492051	1	1
ssc-miR-7144-5p	24	63	42	23	12	13	39	22	34	25	31	24	1.88833	2.59076	2.07087	1.73865	0.852605	0.811337	2.00395	1.90773	1.47662	0.924844	1.25245	0.973831	0.0387015	1	1	-0.771002	0.764905	1	-0.901655	0.525646	0.809211	-0.0993818	1	1
ssc-miR-744	1022	2125	1901	1164	822	429	1520	907	1288	1372	1427	1057	80.4113	87.3868	93.7315	87.9909	58.4034	26.7741	78.1026	78.6504	55.9377	50.7554	57.6533	42.8891	0.0171508	0.970509	1	-0.483984	0.154674	0.379813	-0.695335	0.0443961	0.119724	-0.194333	0.587045	1
ssc-miR-758	916	1887	1725	414	279	93	1480	821	1940	919	1020	629	72.0712	77.5995	85.0535	31.2957	19.8231	5.80418	76.0472	71.1929	84.254	33.9973	41.2098	25.5225	0.325254	0.354833	1	-1.92748	7.7021e-07	7.91872e-06	-1.43294	0.000121379	0.00105088	0.819292	0.0456982	0.417631
ssc-miR-769-3p	6	15	10	5	11	12	14	9	26	5	21	18	0.472082	0.616848	0.493064	0.377968	0.781555	0.748926	0.719366	0.780434	1.12918	0.184969	0.848437	0.730373	0.89285	0.632497	1	0.314467	1	1	-0.672067	1	1	-0.0944268	1	1
ssc-miR-769-5p	580	1619	647	593	474	405	977	487	1086	810	1023	966	45.6346	66.5785	31.9012	44.827	33.6779	25.2763	50.2015	42.2302	47.1649	29.9649	41.331	39.1967	0.297079	0.376733	1	-0.354482	0.299165	0.589374	-0.561333	0.0919706	0.214598	0.0900907	0.841014	1
ssc-miR-7857-3p	2	22	28	3	9	12	11	20	17	20	25	134	0.157361	0.904711	1.38058	0.226781	0.639454	0.748926	0.565216	1.7343	0.738308	0.739875	1.01004	5.43722	0.558335	1	1	-0.40847	1	1	0.954907	0.370422	0.673308	1.92591	0.201603	0.839587
ssc-miR-874	23	76	54	117	65	38	76	22	75	136	270	149	1.80965	3.12536	2.66255	8.84444	4.61828	2.3716	3.90513	1.90773	3.25724	5.03115	10.9085	6.04587	0.558232	0.656657	1	1.1316	0.131289	0.340112	1.03343	0.115816	0.260326	0.464129	0.493263	1
ssc-miR-885-3p	3	14	23	226	716	971	10	7	8	561	744	576	0.236041	0.575725	1.13405	17.0841	50.8721	60.6006	0.513833	0.607004	0.347439	20.7535	30.0589	23.3719	-0.0700562	1	1	5.89748	4.74104e-16	2.59967e-14	5.14985	1.55612e-10	5.11965e-09	-0.790148	0.0709943	0.519048
ssc-miR-885-5p	2	3	14	169	202	323	5	8	5	107	348	229	0.157361	0.12337	0.690289	12.7753	14.3522	20.1586	0.256916	0.693719	0.217149	3.95833	14.0598	9.29197	0.434401	1	1	5.24127	3.22852e-10	7.08123e-09	3.98264	5.47252e-06	6.66836e-05	-0.783701	0.0986939	0.614777
ssc-miR-9	644	1237	1361	232	232	318	917	586	891	814	657	1021	50.6701	50.8694	67.106	17.5377	16.4837	19.8465	47.1185	50.8149	38.696	30.1129	26.544	41.4284	0.0155077	1	1	-1.53193	1.38928e-06	1.30592e-05	-0.68693	0.0221975	0.068252	0.860106	0.0118104	0.18503
ssc-miR-9-1	644	1237	1361	232	232	318	917	586	891	814	657	1021	50.6701	50.8694	67.106	17.5377	16.4837	19.8465	47.1185	50.8149	38.696	30.1129	26.544	41.4284	0.0155077	1	1	-1.53193	1.38928e-06	1.30592e-05	-0.68693	0.0221975	0.068252	0.860106	0.0118104	0.18503
ssc-miR-9-2	644	1237	1361	232	232	318	917	586	891	814	657	1021	50.6701	50.8694	67.106	17.5377	16.4837	19.8465	47.1185	50.8149	38.696	30.1129	26.544	41.4284	0.0155077	1	1	-1.53193	1.38928e-06	1.30592e-05	-0.68693	0.0221975	0.068252	0.860106	0.0118104	0.18503
ssc-miR-92a	51240	140877	102350	37238	37509	37812	83052	50583	80233	98443	96565	79554	4031.58	5793.31	5046.51	2814.95	2665.03	2359.87	4267.48	4386.3	3484.51	3641.78	3901.4	3228.01	0.0320569	0.871189	1	-0.81124	4.40865e-05	0.000315315	-0.385035	0.0513381	0.135122	0.45826	0.020605	0.259568
ssc-miR-92b-3p	124	550	363	187	160	227	396	203	357	390	479	591	9.75636	22.6178	17.8982	14.136	11.3681	14.1672	20.3478	17.6031	15.5045	14.4276	19.3524	23.9806	0.410887	0.343995	1	-0.227259	0.625996	0.937572	-0.100352	0.834277	1	0.537755	0.195639	0.839587
ssc-miR-92b-5p	12	20	15	7	17	8	8	4	5	44	38	87	0.944164	0.822464	0.739596	0.529155	1.20786	0.499284	0.411066	0.34686	0.217149	1.62772	1.53527	3.53014	-0.837294	1	1	-0.0454792	1	1	2.21269	0.138204	0.297184	1.43656	0.199201	0.839587
ssc-miR-935	1	5	11	70	93	97	19	15	19	60	34	55	0.0786803	0.205616	0.54237	5.29155	6.60769	6.05382	0.976282	1.30072	0.825168	2.21962	1.37366	2.2317	1.78822	0.631738	1	4.02388	0.000133441	0.000798219	0.641418	0.736133	0.97739	-1.56372	0.0386776	0.397654
ssc-miR-95	9048	17011	12711	19079	15797	24653	18350	13768	20726	23189	19376	22525	711.9	699.547	626.734	1442.25	1122.38	1538.61	942.883	1193.89	900.128	857.848	782.825	913.981	0.90225	8.60275e-06	0.00141515	1.12179	3.27241e-08	5.12677e-07	-0.464019	0.0212475	0.0672156	-0.683556	0.000685424	0.0212547
ssc-miR-96-5p	1	1	9	1	1	17	2	5	1	3	4	7	0.0786803	0.0411232	0.443758	0.0755935	0.0710504	1.06098	0.102767	0.433574	0.0434299	0.110981	0.161607	0.284034	0.218752	1	1	0.829682	1	1	-0.161743	1	1	-0.764501	1	1
ssc-miR-9788-3p	0	1	2	0	0	0	0	0	1	1	0	0	0	0.0411232	0.0986128	0	0	0	0	0	0.0434299	0.0369937	0	0	-0.240234	1	1	-0.442343	1	1	-0.0431785	1	1	0.135732	1	1
ssc-miR-98	70242	118074	92512	52247	54215	80951	62330	38989	57255	126733	96513	99629	5526.66	4855.58	4561.43	3949.53	3852	5052.19	3202.72	3380.93	2486.58	4688.33	3899.3	4042.57	-0.400397	0.0380219	0.367918	-0.105317	0.58468	0.911657	0.269771	0.162044	0.33957	-0.0253087	0.895889	1
ssc-miR-9807-5p	0	0	0	0	0	0	0	1	0	0	0	0	0	0	0	0	0	0	0	0.0867149	0	0	0	0	0.333473	1	1	-2.56274e-15	1	1	-0.321089	1	1	-2.56274e-15	1	1
ssc-miR-9810-3p	1	5	4	0	0	0	1	0	2	0	2	0	0.0786803	0.205616	0.197226	0	0	0	0.0513833	0	0.0868598	0	0.0808035	0	-0.606914	1	1	-1.16109	1	1	-0.219398	1	1	0.281522	1	1
ssc-miR-9819-5p	0	1	0	0	0	0	0	0	0	0	0	0	0	0.0411232	0	0	0	0	0	0	0	0	0	0	-0.135725	1	1	-0.144767	1	1	2.56274e-15	1	1	-2.56274e-15	1	1
ssc-miR-9820-5p	57	115	15	0	57	15	10	4	2	8	9	8	4.48478	4.72917	0.739596	0	4.04987	0.936158	0.513833	0.34686	0.0868598	0.29595	0.363616	0.32461	-2.69277	0.0290977	0.354501	-0.8372	0.341525	0.645758	-0.111441	1	1	-1.97978	0.234876	0.858837
ssc-miR-9828-3p	0	0	0	0	0	0	0	0	0	0	0	2	0	0	0	0	0	0	0	0	0	0	0	0.0811526	0	1	1	-2.56274e-15	1	1	0.265051	1	1	0.282626	1	1
ssc-miR-9841-3p	0	7	2	0	3	1	2	3	0	5	10	15	0	0.287862	0.0986128	0	0.213151	0.0624105	0.102767	0.260145	0	0.184969	0.404018	0.608644	0.115645	1	1	-0.175061	1	1	0.960815	1	1	1.27342	1	1
ssc-miR-9843-3p	122	279	151	0	424	226	257	145	223	386	411	787	9.599	11.4734	7.44527	0	30.1254	14.1048	13.2055	12.5737	9.68487	14.2796	16.6051	31.9335	0.631121	0.365347	1	0.740299	0.260519	0.535956	0.61089	0.351262	0.644863	0.50256	0.423554	1
ssc-miR-9851-3p	1	6	2	0	0	0	0	0	1	0	1	0	0.0786803	0.246739	0.0986128	0	0	0	0	0	0.0434299	0	0.0404018	0	-0.835427	1	1	-1.06245	1	1	-0.0320309	1	1	0.147617	1	1
ssc-miR-9858-5p	2	9	8	0	3	7	3	3	12	4	1	0	0.157361	0.370109	0.394451	0	0.213151	0.436874	0.15415	0.260145	0.521159	0.147975	0.0404018	0	0.24693	1	1	-0.264428	1	1	-1.33176	1	1	-0.863487	1	1
ssc-miR-9860-5p	40	121	110	0	26	33	58	37	57	51	48	57	3.14721	4.97591	5.4237	0	1.84731	2.05955	2.98023	3.20845	2.4755	1.88668	1.93929	2.31285	-0.311814	0.846665	1	-1.59635	0.0668329	0.1912	-0.673447	0.630399	0.908912	0.605266	0.764536	1
ssc-miR-99a	231770	572829	469454	175460	138748	193667	376443	185175	297962	374502	305774	329123	18235.7	23556.6	23147.1	13263.6	9858.1	12086.9	19342.9	16057.4	12940.5	13854.2	12353.8	13354.6	-0.108126	0.597818	1	-0.772491	0.000178654	0.00104959	-0.496156	0.0157411	0.0512756	0.168209	0.412119	1
ssc-miR-99b	11126	35858	21012	11710	9225	9470	21451	11414	16173	20773	22090	21739	875.397	1474.6	1036.03	885.2	655.44	591.028	1102.22	989.764	702.392	768.471	892.475	882.088	0.0393145	0.874753	1	-0.552084	0.025494	0.0882898	-0.336866	0.172539	0.357014	0.254527	0.303582	0.975363
