# Supplementary material for: Identification of CircRNA-Associated ceRNA Networks Using Longissimus Thoracis of Pigs of Different Breeds and Growth Stages
Source: Research Square preprint supplement (doi:10.21203/rs.3.rs-852221/v1), 2021-11-30
Supplement: Supplementary file 1 [file da1b7aba6f78e7764cd0cb2b.pdf]

**A**

**Marker**      **circPFKFB1**      **circKANSL1L\_3**  
**circLIMCH1**      **circKANSL1L**  
**circ4082**      **circKANSL1L\_2**  
**circMYBPC2**      **circMYBPC2\_2**  
**circNR1H3**

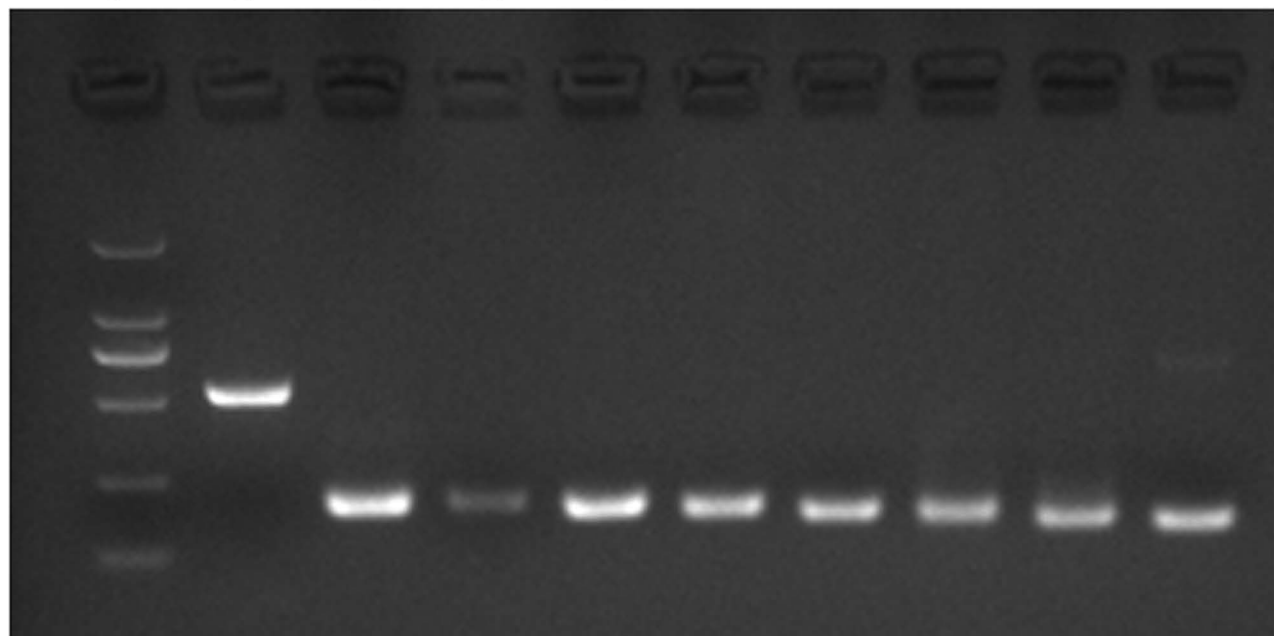

# B

**circPFKFB1 junction sequences (5' → 3')**

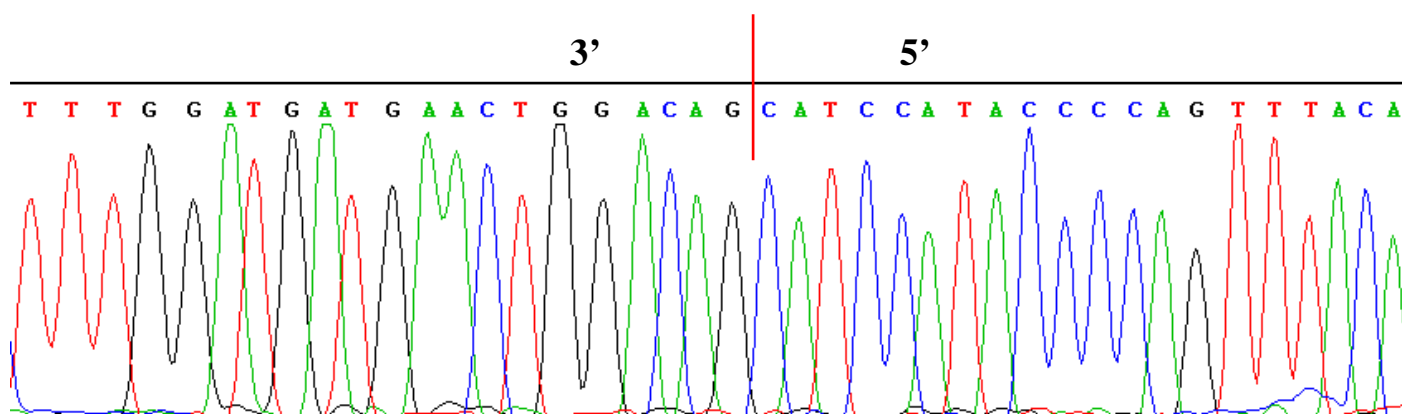

**circKANSL1L\_3 junction sequences (5' → 3')**

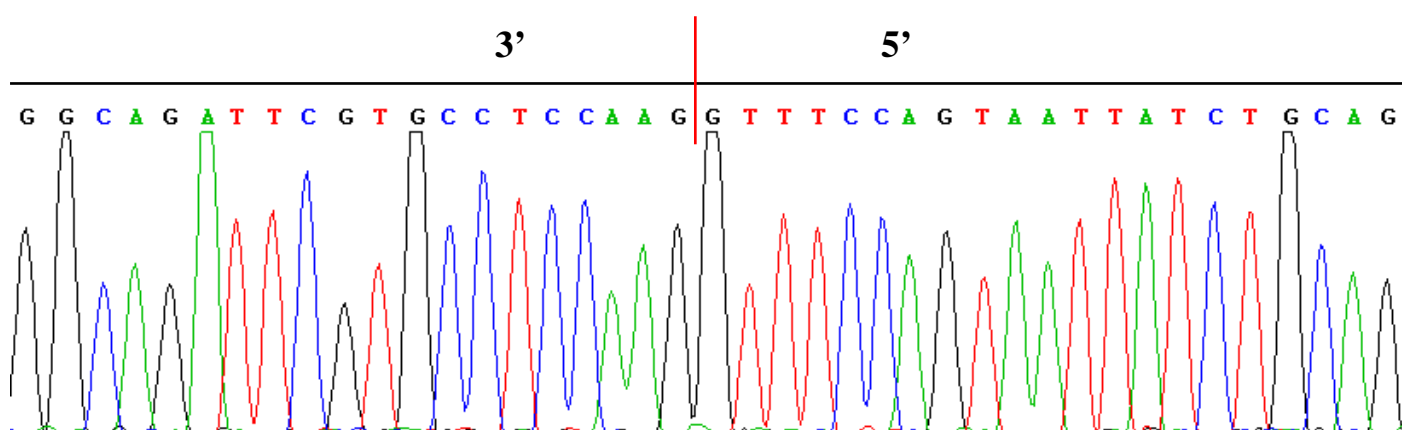

**circLIMCH1 junction sequences (5' → 3')**

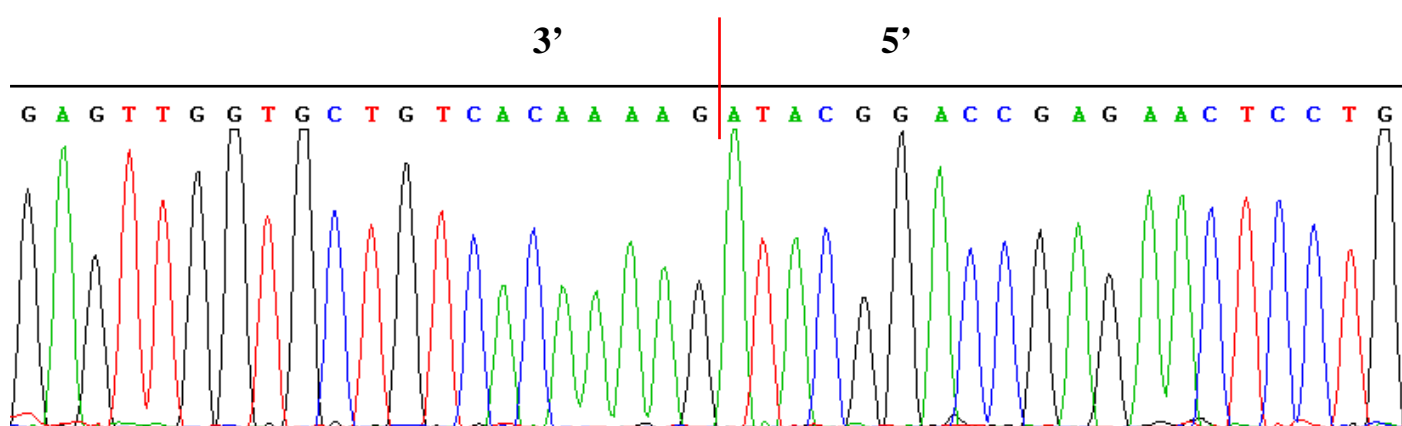

**circKANSL1L junction sequences (5' → 3')**

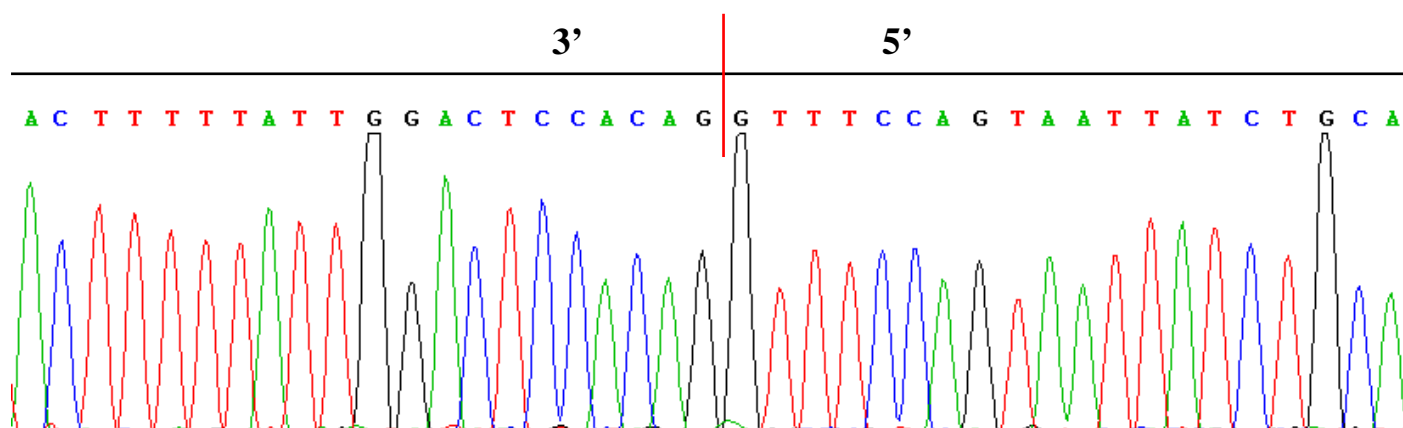

**circ4082 junction sequences (5' → 3')**

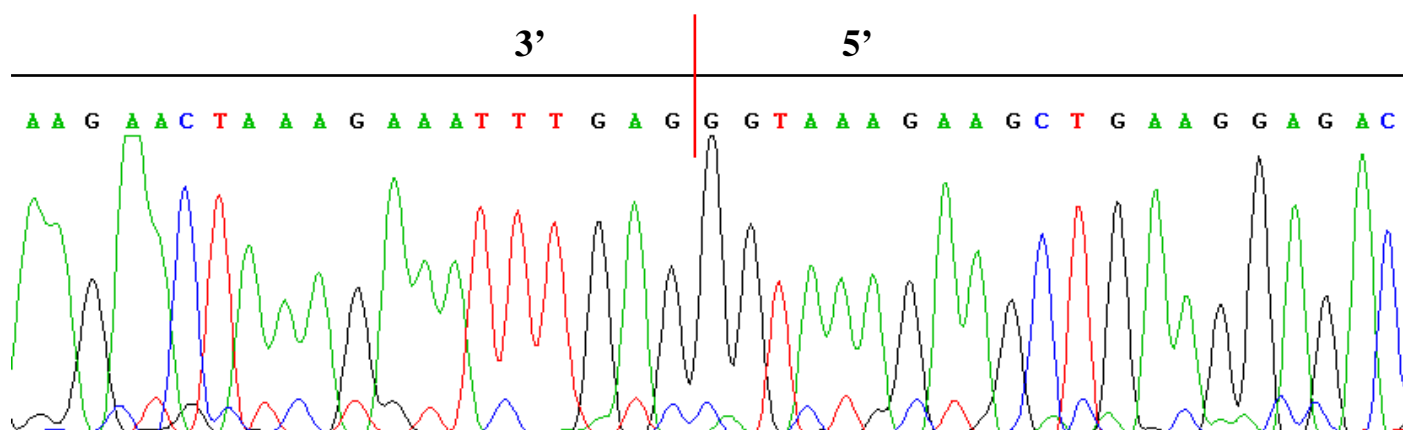

**circKANSL1L\_2 junction sequences (5' → 3')**

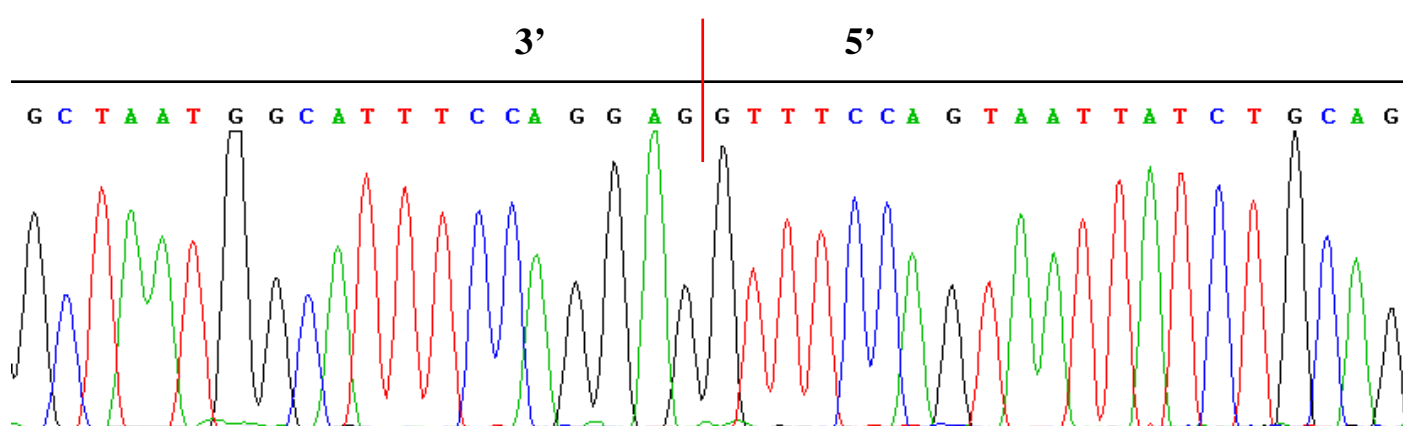

**circMYBPC2 junction sequences (5'→3')**

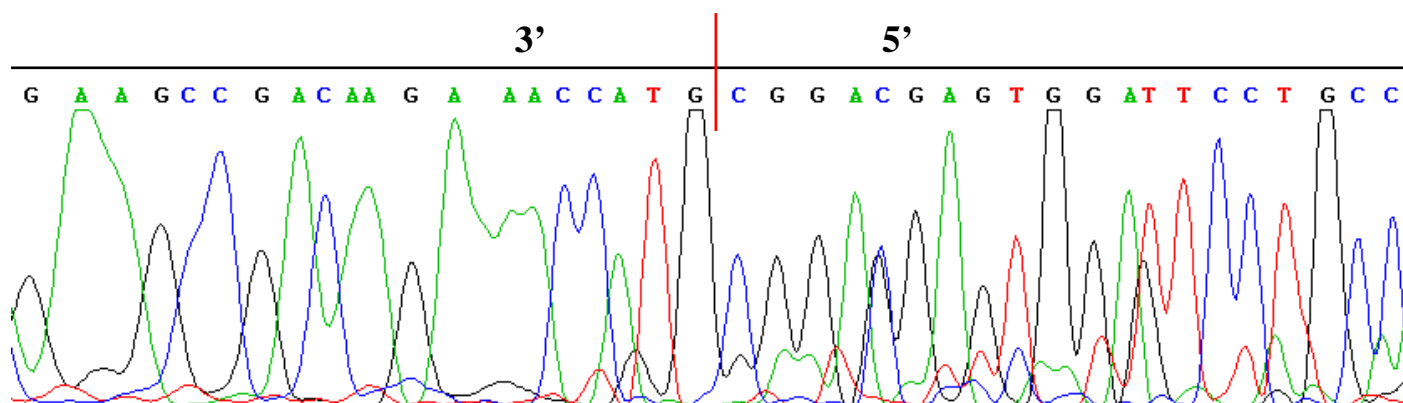

**circMYBPC2\_2 junction sequences (5'→3')**

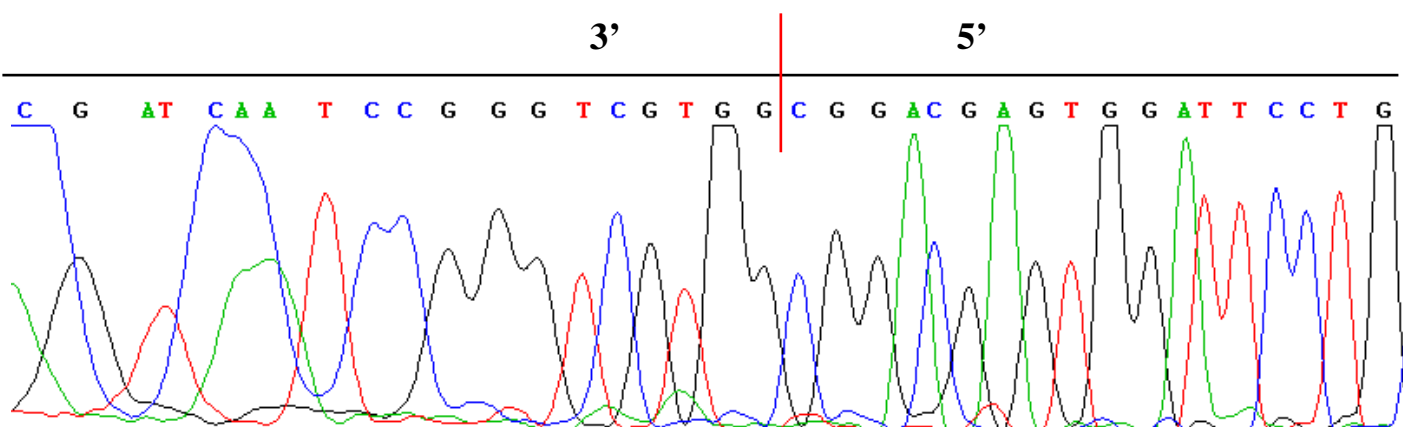

**circNR1H3 junction sequences (5'→3')**

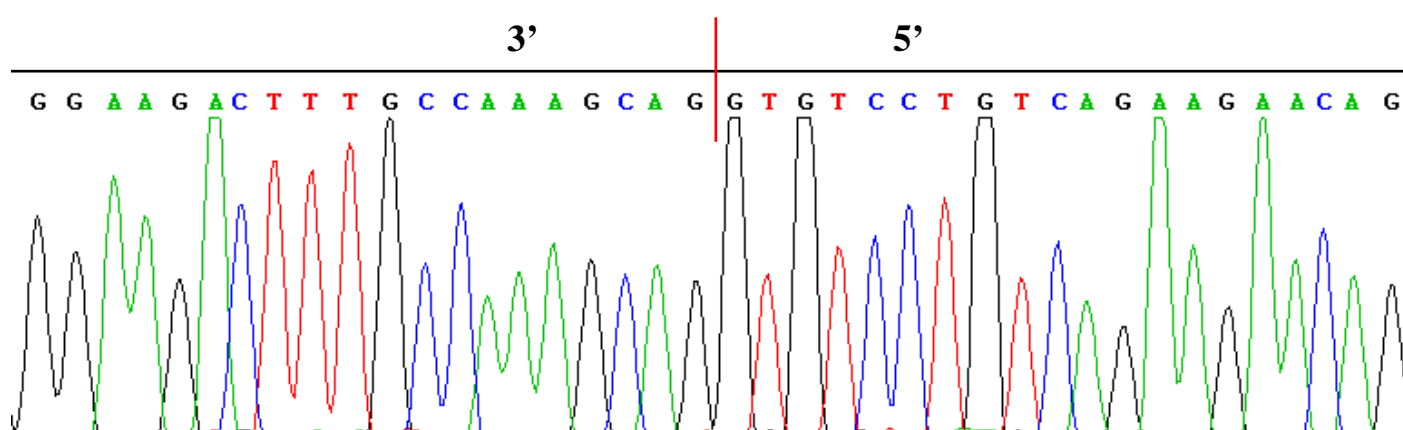

**RT-PCR (A) and Sanger sequencing (B) confirmed head-to-tail junction of circRNA candidates**
