# Supplementary material for: Identification of CircRNA-Associated ceRNA Networks Using Longissimus Thoracis of Pigs of Different Breeds and Growth Stages
Source: Research Square preprint supplement (doi:10.21203/rs.3.rs-852221/v1), 2021-11-30
Supplement: Supplementary file 3 [file 29c79168745ea6dbfc8bc72d.xlsx]

## Sheet: A
Transcript expression levels in each library
Transcript_id	Gene_id	Gene_short_name	Locus	Length	LT1D_1	LT1D_2	LT1D_3	LW1D_1	LW1D_2	LW1D_3	LT90D_1	LT90D_2	LT90D_3	LW90D_1	LW90D_2	LW90D_3
ENSSSCT00000000003	ENSSSCG00000000002	GTSE1	5:3227813-3246243	2608	0.963027	0.305297	1.42347	0.281559	0.499512	0.677473	0.456985	0.18282	0.0843889	0.0375589	0.123372	0.0872647
ENSSSCT00000000004	ENSSSCG00000000003	TTC38	5:3245882-3270814	4789	0.389871	0.15573	0.535011	1.13912	1.17593	0.593756	0.596502	0.26226	0.244445	0.0413229	0.0728302	0.0923953
ENSSSCT00000000006	ENSSSCG00000000005	CDPF1	5:3287461-3294638	862	1.60303	1.43648	8.22993	3.79928	5.83493	4.24404	3.18261	2.3282	2.98322	0.460638	1.06886	0.907862
ENSSSCT00000000007	ENSSSCG00000000006	PPARA	5:3302754-3321091	1406	11.0265	5.9	16.9089	6.77725	6.60651	6.34944	2.73308	3.79958	3.9155	1.0828	1.62895	1.83909
ENSSSCT00000000008	ENSSSCG00000000007	TRMU	5:3208117-3224366	1628	1.1197	0.68739	2.40881	2.31194	3.20736	2.66883	1.30088	1.34816	1.56873	0.379972	0.581761	0.509885
ENSSSCT00000000010	ENSSSCG00000024718	RIBC2	5:3964330-3976359	3854	0	0	0.00475879	0	0	0	0	0	0.00464663	0	0	0
ENSSSCT00000000011	ENSSSCG00000000010	FBLN1	5:3838210-3927217	4222	1.39334	1.25514	2.34932	3.65928	3.56108	2.38785	2.84358	0.770247	1.71783	0.400397	0.486473	1.21656
ENSSSCT00000000015	ENSSSCG00000000014	FAM118A	5:4070702-4101291	2438	0.763285	0.192948	1.38346	2.12133	1.77829	1.56797	1.60398	1.63526	2.47252	0.466266	0.513177	0.808214
ENSSSCT00000000019	ENSSSCG00000000018	KIAA0930	5:4179662-4191378	2549	0.0630724	0.172137	0.476966	0.280516	0.628872	0.609449	0.915276	0.280925	0.0884698	0.0858764	0.195283	0.289329
ENSSSCT00000000020	ENSSSCG00000000019	NUP50	5:4197550-4219415	5467	1.09103	0.967957	2.91529	4.2767	4.27678	3.75496	3.7428	2.62209	3.04183	0.801009	1.15123	1.10187
ENSSSCT00000000021	ENSSSCG00000000020	PHF21B	5:4291398-4385246	1443	0.0696264	0.0140441	0.138062	0.0405272	0.054229	0.0137559	0.0282254	0.126233	0.189358	0	0.0555007	0.0415413
ENSSSCT00000000022	ENSSSCG00000000021	-	5:4399871-4435341	1459	0	0	0	0	0.0133833	0	0.0139324	0	0	0	0	0
ENSSSCT00000000023	ENSSSCG00000000022	RTL6	5:4649977-4650697	720	0.765438	0.578602	1.79853	3.8809	2.79805	2.52378	1.71143	1.04306	1.80556	0.288498	0.543422	0.694119
ENSSSCT00000000024	ENSSSCG00000039522	SHISAL1	5:4704762-4843481	1352	0.0552477	0.035523	0.148278	0	0	4.30623e-140	0.0400502	0	0.0291537	0	0	0
ENSSSCT00000000025	ENSSSCG00000000024	PARVB	5:4909648-5015339	1053	6.34147	4.07452	12.4013	13.5377	10.2085	13.1596	7.95502	6.82369	12.4702	2.9592	5.1129	5.04382
ENSSSCT00000000026	ENSSSCG00000000025	PARVG	5:4873307-4898706	2549	0.0149588	0.0150898	0.0274781	0.0360285	0.111275	0.0658743	0.472488	0.176239	0.158568	0.0376803	0.0446208	0.27749
ENSSSCT00000000029	ENSSSCG00000000028	-	5:5375713-5408124	1497	0	0	0.0132423	0.0129557	0	0	0	0.0134534	0	0	0	0
ENSSSCT00000000030	ENSSSCG00000000029	SCUBE1	5:5561605-5686841	3033	1.00449e-06	0.0422675	2.08073e-06	0.0327073	5.37721e-05	0.0448404	1.01653e-06	0.0245171	9.60087e-07	5.71501e-05	1.31273e-06	5.82618e-06
ENSSSCT00000000033	ENSSSCG00000000031	MCAT	5:5742161-5751692	1617	0.356482	0.322072	1.20357	1.362	1.8094	0.842146	0.843243	0.660029	0.654036	0.120926	0.0956772	0.014306
ENSSSCT00000000035	ENSSSCG00000000033	TSPO	5:5723189-5735131	833	0.492083	0.259899	1.43637	8.3006	7.29348	4.24708	4.32814	1.30075	1.96116	0.213521	0.902841	1.73555
ENSSSCT00000000036	ENSSSCG00000000034	TTLL12	5:5701531-5718999	3213	2.70988	1.46432	4.94449	7.1149	6.78908	6.4913	5.72539	3.53178	4.25557	1.13835	2.59996	2.08259
ENSSSCT00000000037	ENSSSCG00000000035	TTLL1	5:5793780-5827632	1681	0.794485	0.676202	1.29297	1.32195	1.51915	2.23304	2.07173	1.65192	1.15803	0.426364	0.63484	0.718939
ENSSSCT00000000038	ENSSSCG00000000036	PACSIN2	5:5899216-5985173	3255	0.445792	7.09549e-05	1.29287	1.17887	0.464713	0.912634	0.70255	0.558976	1.26648	0.328836	0.545663	0.401211
ENSSSCT00000000039	ENSSSCG00000000037	ARFGAP3	5:5994175-6050539	2715	0.614079	0.945961	1.22196	5.87204	4.8881	4.08741	1.89924	1.43604	1.20733	0.407332	0.692986	0.734047
ENSSSCT00000000040	ENSSSCG00000000038	CYB5R3	5:6152921-6169262	903	6.28684	4.26584	8.05506	11.1771	10.982	10.8838	10.2637	5.18802	5.39106	1.57189	3.50901	3.48021
ENSSSCT00000000041	ENSSSCG00000000039	POLDIP3	5:6174558-6202081	3533	3.00597	1.77034	6.17623	7.08022	6.68358	6.17768	4.93178	2.79965	3.78813	0.969431	1.17223	1.51424
ENSSSCT00000000042	ENSSSCG00000000040	SEPT3	5:6623313-6654438	1608	0.0246773	0	0	0	0.0181071	8.19491e-07	0.000142546	8.05642e-07	0.0180642	0	0.0313691	0
ENSSSCT00000000043	ENSSSCG00000000040	SEPT3	5:6604282-6623402	1032	0	0	0	0	0.0402341	0	0.0208986	0	0.100299	0	0	0.0609983
ENSSSCT00000000046	ENSSSCG00000000050	NAGA	5:6571004-6588054	2353	1.76454	0.983997	3.38992	3.84018	5.89489	4.27003	3.6414	1.91022	1.87452	0.422291	0.873633	1.26565
ENSSSCT00000000048	ENSSSCG00000020945	SMDT1	5:6568079-6571275	993	7.54863	5.42714	15.3651	15.1015	17.4585	20.306	14.4525	8.60571	6.28602	2.80499	4.04845	4.04291
ENSSSCT00000000049	ENSSSCG00000000045	NDUFA6	5:6562050-6567647	1229	4.52898	4.85365	17.2401	15.2533	16.885	20.6542	14.8612	6.8495	11.4505	2.17016	3.78343	2.87265
ENSSSCT00000000051	ENSSSCG00000000046	CYP2D25	5:6538906-6543746	1858	0.0947028	0.0318408	0.322465	0.0508533	0.0713939	0	0.191305	0.0317086	0.0814236	0.021198	0	0.0314212
ENSSSCT00000000055	ENSSSCG00000000050	NAGA	5:6580140-6587550	1235	4.20952e-07	3.55183e-07	4.81223e-07	1.93063e-06	4.7261e-06	4.31186e-05	3.33161e-06	1.24619e-05	1.52496e-06	3.004e-11	9.46676e-13	9.77304e-06
ENSSSCT00000000063	ENSSSCG00000000057	C22orf46	5:6877916-6884879	825	0	0	0	0	0	0	0	0	0.0265099	0	0	0
ENSSSCT00000000064	ENSSSCG00000000058	SNU13	5:6891001-6900026	1468	5.11183	5.78522	14.1501	21.0626	20.0318	17.5828	20.2912	14.0849	19.3019	3.7657	5.35277	7.4539
ENSSSCT00000000065	ENSSSCG00000000059	XRCC6	5:6900963-6929220	4949	0.0301923	0.0368645	0.0214464	0.0376961	0.0400117	1.40507e-06	0.0240074	0.0620865	2.58063e-09	0.0175434	0.0163146	0.0189216
ENSSSCT00000000067	ENSSSCG00000000061	PMM1	5:6964998-6975904	1532	0.53391	0.420278	1.18687	2.20862	2.31735	2.55652	1.52952	0.838828	0.808599	0.144248	0.35023	0.246097
ENSSSCT00000000068	ENSSSCG00000000062	CSDC2	5:6976276-6988352	2203	0.244885	0.317597	0.414367	0.691859	0.448251	0.60879	0.282177	0.105269	0.177264	0.0704882	0.086997	0.278713
ENSSSCT00000000069	ENSSSCG00000000063	POLR3H	5:6999980-7014430	2669	0.797825	0.482724	1.42971	0.995307	1.46672	1.49937	1.63507	0.796969	1.43303	0.201807	0.470801	0.339907
ENSSSCT00000000070	ENSSSCG00000000064	ACO2	5:7014382-7071023	2666	68.5501	48.5875	166.997	165.29	203.733	202.655	96.4306	87.8326	109.638	22.1068	45.2481	41.417
ENSSSCT00000000072	ENSSSCG00000000066	L3MBTL2	5:7253384-7277678	7289	0.396051	0.204855	0.826913	0.365122	0.473699	0.545543	0.7033	0.485334	0.578648	0.176885	0.345881	0.415134
ENSSSCT00000000073	ENSSSCG00000000067	CHADL	5:7248449-7252936	2214	0.0347327	0.00871689	0.0342805	0.0754651	6.01797e-06	0.085217	0.175343	0.183163	0.167845	0.0174632	0.0172432	0.0259253
ENSSSCT00000000074	ENSSSCG00000000068	EP300	5:7312261-7373440	7206	0.0971842	1.7713e-05	0.134912	0.0644538	0.0632867	1.53319e-05	8.95595e-06	3.84826e-05	0.314713	2.9243e-05	0.0823537	4.14937e-05
ENSSSCT00000000077	ENSSSCG00000000071	-	5:7583047-7616382	2216	4.8196	4.63611	11.1344	11.8544	11.7811	12.7054	8.04504	5.18189	6.61932	3.14806	4.19094	3.13818
ENSSSCT00000000078	ENSSSCG00000000072	SLC25A17	5:7622693-7670281	1877	0.00620339	0.117793	0.428561	0.551209	0.491236	0.877293	0.282153	0.609906	0.0559147	0.276286	0.106728	0.118027
ENSSSCT00000000079	ENSSSCG00000000073	-	5:7673982-7675196	378	0	0.082303	0.34415	0.341746	0.0870909	0	0.0887476	0	0.259207	0.0818096	0	0
ENSSSCT00000000080	ENSSSCG00000000074	MCHR1	5:7735821-7737597	1585	0.0125378	0.0126454	0	0.0121449	0	0	0.012689	0	0.0121572	0	0	0
ENSSSCT00000000081	ENSSSCG00000000075	MKL1	5:7874346-7975925	4518	0.22058	0.0657446	0.221805	0.131308	0.122677	0.224301	0.241669	0.311352	0.268371	0.152938	0.0302675	0.117667
ENSSSCT00000000082	ENSSSCG00000000076	SGSM3	5:7976098-8017770	2880	1.37927	0.901277	2.70536	2.38355	2.84518	2.57626	2.02241	1.36407	1.85907	0.50307	0.816195	0.53963
ENSSSCT00000000083	ENSSSCG00000000077	ADSL	5:8027587-8045528	1732	7.1377	4.98674	20.6549	17.3677	18.936	17.3042	21.8299	14.6802	21.3275	3.41132	3.83592	4.46757
ENSSSCT00000000084	ENSSSCG00000000078	TNRC6B	5:8064531-8175663	5379	0.00018253	0.163605	0.366459	1.26867e-05	1.08054e-05	0.0361343	0.0601294	0.0943238	0.0420705	4.45571e-05	0.270578	0.000122593
ENSSSCT00000000085	ENSSSCG00000000079	FAM83F	5:8320977-8354723	6022	0	0	0.00598865	0.0146148	0.0468206	0.0741034	0	0.0152186	0	0	0.00302668	0.00608163
ENSSSCT00000000086	ENSSSCG00000000080	GRAP2	5:8375925-8417248	2040	0	0	0.0344983	0.00627429	0.00919974	0.0279842	0.054353	0.0476934	0.0215984	0.00957406	0	0.0450471
ENSSSCT00000000087	ENSSSCG00000000081	-	5:8534266-8553015	1417	0	0	0	0.0137927	0	0	0	0.0143192	0	0	0	0
ENSSSCT00000000088	ENSSSCG00000000082	CACNA1I	5:8597052-8701228	6451	0	0.00573182	0	0	0	0	0.00569458	0.0113428	0.00544389	0	0	0
ENSSSCT00000000089	ENSSSCG00000000083	RPS19BP1	5:8735381-8738817	827	3.74912	1.67372	10.014	7.48188	6.12533	8.68143	8.02772	3.843	6.52767	0.700168	1.12541	1.16736
ENSSSCT00000000090	ENSSSCG00000000084	ATF4	5:8742966-8745368	1734	34.2858	26.0408	97.2185	114.492	155.545	110.48	357.07	190.315	190.16	44.7424	99.6141	85.2649
ENSSSCT00000000093	ENSSSCG00000000087	TAB1	5:8824674-8852850	6447	0.824955	0.553464	2.04953	2.25784	1.87588	2.26838	1.66387	1.18891	1.76312	0.24637	0.344528	0.442068
ENSSSCT00000000095	ENSSSCG00000000089	-	5:8923673-8927953	768	5.5522	4.26396	19.6587	12.2305	10.7415	10.0949	7.40828	2.81644	3.49022	0.797407	1.50039	1.59953
ENSSSCT00000000096	ENSSSCG00000000090	CBX7	5:9070352-9087634	1099	0.285375	0.364491	0.719923	0.983602	0.829759	0.624852	1.12401	0.750418	1.45973	0.34464	0.436727	0.755617
ENSSSCT00000000097	ENSSSCG00000000091	APOBEC3B	5:9094802-9116450	5922	0.0614248	0.0312327	0.0639856	0.225526	0.0995521	0.215591	0.0967999	0.0970605	0.134375	0.0067736	0.0717399	2.33951e-05
ENSSSCT00000000098	ENSSSCG00000000092	NPTXR	5:9207670-9230351	5431	0.0203411	0.0410447	0	0.071541	0.0195348	0.0164904	0.0306007	0	0.00975242	0.00341729	0	0
ENSSSCT00000000099	ENSSSCG00000000093	DNAL4	5:9236624-9248726	1421	0.245267	0.243594	0.674363	1.27834	1.19848	1.2338	1.29474	0.468364	0.630425	0.158047	0.327585	0.213167
ENSSSCT00000000100	ENSSSCG00000000094	SUN2	5:9273227-9293255	3934	0.677627	0.836133	0.56189	0.491594	0.994391	1.43108	2.23529	3.06248	1.41323	2.44696e-05	1.4533	0.481052
ENSSSCT00000000101	ENSSSCG00000000095	GTPBP1	5:9295400-9322171	3999	0.512777	0.000199702	0.618087	0.448441	0.41051	0.412591	0.528266	0.433169	0.298926	0.176859	0.204839	0.270677
ENSSSCT00000000102	ENSSSCG00000039555	JOSD1	5:9322627-9332221	1445	0.0792633	0.285471	0.249119	0.684666	0.764109	0.332116	0.282402	0.423868	0.349485	0.104559	0.139885	0.0408701
ENSSSCT00000000103	ENSSSCG00000000097	-	5:9336128-9358142	1849	4.86615	3.12635	15.3838	17.3322	16.94	17.1999	19.8319	13.1873	14.5102	2.80237	4.76964	4.93827
ENSSSCT00000000109	ENSSSCG00000000103	DMC1	5:9433057-9470549	2257	0	0.00859507	0.00840876	0.0164362	0	0.0334041	0	0.01709	0.0164431	0	0	0
ENSSSCT00000000110	ENSSSCG00000000104	DDX17	5:9486028-9503052	2319	11.3253	7.11934	29.4533	21.1708	15.8314	18.3505	12.8703	9.57204	13.0281	3.28145	5.69303	5.85982
ENSSSCT00000000111	ENSSSCG00000000105	KDELR3	5:9505156-9515734	1744	1.24076	1.64966	4.87597	5.95761	5.34056	3.88483	3.55724	1.21305	1.1794	0.772532	1.02187	1.07759
ENSSSCT00000000112	ENSSSCG00000000106	KCNJ4	5:9547176-9548520	1344	0.0150893	0	0.0299505	0.0146567	0	0	0	0	0.0146771	0	0	0
ENSSSCT00000000113	ENSSSCG00000000107	-	5:9594986-9615759	2871	0.77496	0.675649	1.89426	1.62763	1.60953	1.30806	1.27382	0.683195	0.917895	0.294404	0.595055	0.507299
ENSSSCT00000000114	ENSSSCG00000000108	TMEM184B	5:9633554-9682473	3949	1.09677	0.865347	1.08911	0.715629	0.493943	0.885822	1.00815	0.267707	0.958823	0.246505	0.531161	0.623984
ENSSSCT00000000116	ENSSSCG00000000110	PLA2G6	5:9724035-9777260	2421	0.0557961	0.0257263	0.263913	0.155682	0.223298	0.108126	0.0170249	0.0525239	9.97767e-08	9.18176e-05	9.00597e-06	0.0689558
ENSSSCT00000000117	ENSSSCG00000000111	BAIAP2L2	5:9778726-9799703	2100	0.386826	0.343741	0.64571	0.720059	0.47233	0.677683	0.566716	0.628424	0.595916	0.0835048	0.146606	0.128393
ENSSSCT00000000119	ENSSSCG00000000113	SLC16A8	5:9801758-9806321	1446	0.138863	0.0980114	0.038204	0.13471	0.0675634	0.164615	0.154808	0.0978839	0.0404138	0.0139256	0	0
ENSSSCT00000000120	ENSSSCG00000000114	PICK1	5:9808450-9826322	2839	0.265547	0.276861	0.957604	0.982645	1.1156	1.04955	0.759786	0.351821	0.693263	0.156832	0.191265	0.309364
ENSSSCT00000000121	ENSSSCG00000039315	SOX10	5:9892245-9905569	1686	1.84109e-06	4.28083e-28	4.7806e-09	1.12208e-05	0.0635259	1.08194e-05	1.92881e-14	0.0196158	1.18118e-05	2.1382e-06	2.0209e-24	3.30527e-15
ENSSSCT00000000122	ENSSSCG00000000116	POLR2F	5:9904947-9917744	1021	5.06247	3.97474	16.9052	19.2429	16.0602	19.0874	25.3206	17.1258	16.9083	3.21504	4.59969	4.88004
ENSSSCT00000000123	ENSSSCG00000000117	C22orf23	5:9917750-9925634	2506	0.152329	0.0614654	0.225317	0.154115	0.198574	0.141645	0.168756	0.11449	0.234911	0.0767407	0.106028	0.1214
ENSSSCT00000000124	ENSSSCG00000000118	MICALL1	5:9927319-9956827	2574	0.513544	0.266059	0.519267	0.385041	0.335834	0.645423	0.409916	0.452379	0.691821	0.372873	0.507804	0.494072
ENSSSCT00000000125	ENSSSCG00000000119	EIF3L	5:9970016-9996024	1803	11.3072	8.44894	28.2362	54.3681	54.1492	55.5894	42.8037	24.4268	22.1114	5.91418	9.35615	9.97915
ENSSSCT00000000126	ENSSSCG00000000120	ANKRD54	5:10003835-10018944	3306	0.352152	0.269311	1.02327	1.32714	1.2583	1.05334	1.06765	0.596726	0.873844	0.131651	0.304788	0.339686
ENSSSCT00000000127	ENSSSCG00000000121	GALR3	5:10024347-10026101	1131	0.0183982	0	0.0915564	0.0179349	0.0540514	0.0548826	0	0.0557944	0.125781	0.0555512	0	0.0182714
ENSSSCT00000000128	ENSSSCG00000029945	GCAT	5:10031224-10038476	1468	0.16391	0.151534	1.40808	1.68239	1.47559	2.91337	0.595092	1.03162	2.22814	0.261327	0.59879	0.543342
ENSSSCT00000000136	ENSSSCG00000000130	CYTH4	5:10489288-10521735	3250	0.0809591	0.0816736	0.239126	0.422641	0.479085	0.344356	0.517394	0.214103	0.489385	0.0874143	0.189641	0.461108
ENSSSCT00000000139	ENSSSCG00000000133	TST	5:10749466-10759619	1229	2.47129	1.89002	11.8394	14.3409	15.9111	20.2436	13.4234	9.06388	7.49154	1.00733	2.32921	3.27082
ENSSSCT00000000141	ENSSSCG00000000135	KCTD17	5:10707353-10718983	1525	0.0785337	0.039603	0.116709	0.139549	0.101833	0.0774837	0.106032	0.0395238	0.0381005	0	0.0260766	0.0260372
ENSSSCT00000000142	ENSSSCG00000000136	CSF2RB	5:10814007-10840808	7775	0.0211201	0.0544567	0.0506809	0.152894	0.137289	0.0980188	0.270378	0.0749365	0.103379	0.0567767	0.0745416	0.133455
ENSSSCT00000000145	ENSSSCG00000000139	IFT27	5:11000411-11015327	570	0.217761	0.219384	1.15201	1.04748	0.705676	1.25918	1.59181	0.67407	0.263376	0.218609	0.175277	0.343529
ENSSSCT00000000147	ENSSSCG00000000141	EIF3D	5:11213280-11233149	6288	3.13479	2.37135	8.75536	8.16344	6.49601	6.73014	4.25916	3.07143	4.28412	1.00826	1.8037	1.82391
ENSSSCT00000000148	ENSSSCG00000000142	FOXRED2	5:11233844-11254712	6416	0.0512753	0.0517523	0.249629	0.529077	0.557139	0.638636	0.326384	0.125752	0.128648	0.0507162	0.121914	0.150188
ENSSSCT00000000150	ENSSSCG00000000144	-	5:11264464-11277631	1420	7.44954	5.39801	21.7243	16.7886	13.9422	18.6854	11.4215	7.43027	12.4726	2.10891	4.87677	3.92671
ENSSSCT00000000151	ENSSSCG00000000145	MYH9	5:11398165-11455054	5880	8.82931	4.98772	12.4714	10.4719	9.61666	14.6349	13.1352	6.0332	10.6469	3.27668	7.46095	7.8162
ENSSSCT00000000153	ENSSSCG00000000146	-	3:7002732-7132492	5236	0.345634	1.24624e-05	0.310451	0.245281	0.71154	0.40414	0.661969	0.473724	0.504289	3.07406e-27	0.178241	0.427792
ENSSSCT00000000156	ENSSSCG00000000148	-	5:11509985-11543032	3962	0.264369	0.116837	0.378191	0.155486	0.175093	0.301724	0.524725	0.331614	0.244325	0.0676315	0.103922	0.0705861
ENSSSCT00000000159	ENSSSCG00000000151	-	5:11920385-11929669	1881	0.00193738	1.47956e-07	0.123125	0.103312	0.010044	0.0101844	0.0114068	2.15853e-06	0.0803212	0	0.072311	0.0103152
ENSSSCT00000000160	ENSSSCG00000000152	RBFOX2	5:11696933-11899864	1340	2.25932	1.09686	5.46059	3.66213	2.58522	3.8252	3.49387	1.27437	1.49051	0.31571	0.541548	0.801447
ENSSSCT00000000164	ENSSSCG00000000156	FBXO7	5:12505646-12525727	1765	1.16947	1.17176	2.88663	3.37158	3.88689	2.98664	2.08062	1.17859	1.51786	0.213578	0.566192	0.713657
ENSSSCT00000000165	ENSSSCG00000000157	BPIFC	5:12535678-12579900	4455	0	0	2.57703e-08	0.0169034	0.00570287	2.08606e-07	0	1.90828e-07	0.00798532	1.99136e-07	1.73493e-07	1.94521e-07
ENSSSCT00000000167	ENSSSCG00000000158	RTCB	5:12579974-12607578	3895	1.20085	0.79157	3.86861	4.09954	4.65351	4.19263	3.52675	2.33915	2.93642	0.58344	1.15494	1.00169
ENSSSCT00000000169	ENSSSCG00000000160	PRDM4	5:12638388-12668879	4124	0.874322	0.24738	0.827492	0.392141	1.52821	1.22996	0.573401	0.781886	0.160839	0.163598	9.49824e-05	0.241181
ENSSSCT00000000170	ENSSSCG00000000161	PWP1	5:12703303-12730726	1488	1.81622	0.895517	4.03991	5.4788	5.9559	4.80762	4.2111	3.96884	4.20524	0.704413	1.35369	0.776027
ENSSSCT00000000171	ENSSSCG00000000162	BTBD11	5:12754538-13069527	5905	0.0355299	0.030711	0.167402	0.113268	0.1053	0.252459	0.148761	0.0927408	0.136053	0.0380566	0.0543098	0.0568219
ENSSSCT00000000173	ENSSSCG00000000164	CRY1	5:13275543-13364591	2892	0.601776	0.22785	0.835777	1.52687	1.69413	1.00515	0.856833	0.867819	0.703853	0.118376	0.152424	0.290169
ENSSSCT00000000176	ENSSSCG00000000167	RIC8B	5:13472297-13580562	2209	0.505838	0.608139	1.19086	0.228139	0.00120612	0.0156739	0.218191	0.00138827	0.126509	1.02511e-05	0.394506	0.400348
ENSSSCT00000000177	ENSSSCG00000000169	POLR3B	5:13590157-13758140	4228	0.00234107	0.0196341	0	0.00476286	0.0186246	0.00482262	0.0102661	0.00245112	0.0143115	0	0	0
ENSSSCT00000000178	ENSSSCG00000000169	POLR3B	5:13732002-13926539	3273	0.583366	0.237035	1.06578	1.37399	0.686501	1.54772	0.859165	0.618661	0.636951	0.0190982	0.193798	0.302546
ENSSSCT00000000180	ENSSSCG00000000171	CKAP4	5:14021320-14030039	1778	1.87726	0.913321	5.27493	3.3747	4.33777	5.07282	4.49717	1.58682	1.51768	1.02326	2.01165	1.80233
ENSSSCT00000000183	ENSSSCG00000000174	TEX49	5:14826610-14833846	369	0	0	0.26988	0	0	0.0936933	0	0	0	0	0	0
ENSSSCT00000000184	ENSSSCG00000000175	ADCY6	5:14836797-14850728	3441	2.40721	1.40655	2.65882	2.74339	3.09408	2.59855	1.24242	0.675586	0.780066	0.230521	0.416693	0.564603
ENSSSCT00000000185	ENSSSCG00000000176	DDX23	5:14886693-14909741	5554	1.08	0.808863	2.15471	2.99952	3.27987	2.8036	2.46183	1.96194	2.53793	0.621127	1.09871	0.902095
ENSSSCT00000000188	ENSSSCG00000000179	CCDC65	5:14950491-14959327	2158	0.00894284	0.036083	0.0529712	0.0862913	0.0346009	0.0438506	0.0180368	0.0358855	0.0172666	0.0270278	0.00889618	0.0178108
ENSSSCT00000000189	ENSSSCG00000000180	FKBP11	5:14958781-14970752	1244	0.197771	0.448739	1.08081	1.36277	1.73869	1.04586	1.65779	0.548928	0.497804	0.28204	0.410883	0.507666
ENSSSCT00000000191	ENSSSCG00000000182	WNT10B	5:14997380-15013613	4839	0.0142967	0.0115591	0.0337838	0.0227346	0.0684021	4.00205e-08	3.46088e-07	0.00381557	0.00732797	0	0.00379282	2.9455e-07
ENSSSCT00000000194	ENSSSCG00000000184	DDN	5:15027080-15029652	2165	0	0	0	0.00859872	0.00861968	0.0174782	0	0	0.0258085	0	0	0.00887441
ENSSSCT00000000195	ENSSSCG00000000185	-	5:15033051-15049656	1705	3.06492	1.84872	8.14063	8.69139	9.37563	8.46102	5.11255	3.12744	2.26201	0.779359	1.35073	1.63243
ENSSSCT00000000197	ENSSSCG00000000186	RHEBL1	5:15093608-15097764	1997	0.0389059	0.0196218	0.048043	0.131505	0.178938	0.210089	0.0294488	0.00976366	0.0093988	0	0.0096782	0.0290507
ENSSSCT00000000199	ENSSSCG00000000188	DHH	5:15114526-15119577	1855	0.0632469	0.0212647	0.114627	0.244533	0.214566	0.310849	0.43653	0.0635304	0.142747	0.0530887	0	0.0104922
ENSSSCT00000000200	ENSSSCG00000000189	LMBR1L	5:15121554-15135252	2142	0.460708	0.411889	1.27714	3.00389	2.84524	1.43411	1.26931	0.882892	1.12487	0.209357	0.649788	0.759771
ENSSSCT00000000201	ENSSSCG00000000190	TUBA1B	5:15186065-15190062	1904	6.46771	5.59902	22.8872	19.6183	17.7633	26.2799	22.099	7.99403	8.13697	3.2806	8.16677	6.68127
ENSSSCT00000000203	ENSSSCG00000000190	TUBA1B	5:15150223-15153620	1644	6.9527	3.37309	21.7563	25.5237	22.0069	41.1889	24.1557	6.72675	12.5642	4.18624	15.4527	13.9119
ENSSSCT00000000204	ENSSSCG00000035856	-	5:15049829-15070225	11456	2.13231	0.775515	2.90673	1.30578	1.06975	1.34866	1.13835	2.13115	3.38459	0.47783	0.860138	1.73462
ENSSSCT00000000207	ENSSSCG00000000194	TUBA1C	5:15260841-15270100	1970	0.775597	0.303432	2.20197	2.20426	1.9872	4.70479	4.82972	0.693056	0.905585	0.250858	1.92995	1.44708
ENSSSCT00000000208	ENSSSCG00000000195	PRPH	5:15285251-15289524	2569	0	0.00748051	0.0146241	0.00714541	0	0.0290301	0.0149353	0.0222935	0.00714524	0	0	0.0221666
ENSSSCT00000000210	ENSSSCG00000000197	C1QL4	5:15308281-15312520	2222	0.00866531	0	0.0342101	0.0167177	0	0.0339781	0.0262083	0.0260731	0	0	0.0172386	0
ENSSSCT00000000211	ENSSSCG00000000198	DNAJC22	5:15322507-15335076	1743	0	0	0.0223255	0	0	0	0.0114087	0.0226837	0	0	0	0
ENSSSCT00000000212	ENSSSCG00000000199	-	5:15347632-15484756	2919	7.99332e-06	0.000117576	0.232216	1.66575e-05	0.162973	1.49e-05	0.524475	0.0942272	0.078962	5.62783e-06	4.92309e-06	1.17912e-05
ENSSSCT00000000215	ENSSSCG00000000202	MCRS1	5:15517032-15526523	2267	1.55151	0.505762	2.59847	4.20299	4.37124	3.46094	4.47646	2.50799	2.09728	0.360274	0.818855	0.585794
ENSSSCT00000000216	ENSSSCG00000000203	KCNH3	5:15495901-15517020	4383	5.8963e-07	6.28787e-06	2.396e-08	5.96864e-06	6.18369e-06	6.03264e-06	6.12553e-06	6.22614e-06	6.08828e-06	6.43735e-06	6.2735e-06	5.66262e-06
ENSSSCT00000000217	ENSSSCG00000000204	PRPF40B	5:15570480-15592383	3250	0.444985	0.264083	1.11394	0.787266	0.665651	0.581577	0.562221	0.216156	0.689381	0.110191	0.254826	0.301803
ENSSSCT00000000218	ENSSSCG00000000205	FAM186B	5:15542245-15560066	3153	0.0417913	0.0180685	0.117578	0.0861364	0.069032	0.0932751	0.114055	0.0238999	0.040199	0.0120327	0.0355997	0.0476025
ENSSSCT00000000219	ENSSSCG00000000206	FAIM2	5:15779333-15813034	4939	0.0112175	0.0188623	0.018375	0.0251157	0.0143703	0.0145577	0.120045	0.067239	0.0860873	0.0263826	0.0297069	0.0857698
ENSSSCT00000000220	ENSSSCG00000000207	-	5:15774937-15775449	489	0.461231	0.437172	1.36531	1.43065	1.33794	1.59458	1.93818	1.1013	1.11788	0.136037	0.328719	0.506716
ENSSSCT00000000223	ENSSSCG00000000209	NCKAP5L	5:15711253-15761537	5006	0.100183	0.165541	0.502366	0.215298	0.180014	0.258651	0.410014	0.171956	0.124002	0.0771646	0.154904	0.2577
ENSSSCT00000000226	ENSSSCG00000000211	AQP5	5:15876400-15881332	2727	0.00696083	0	0.0137204	0.0335119	0.0201474	0.0136136	0.0560468	0	0	0	0	0.00693566
ENSSSCT00000000227	ENSSSCG00000000212	AQP6	5:15887946-15892148	2531	0	0	0	0.0145217	0.0145526	0.00737554	0	0	0	0.00759323	0	0
ENSSSCT00000000229	ENSSSCG00000000214	GPD1	5:16008484-16014419	1495	13.7068	5.314	43.1166	11.9625	20.0942	24.5393	144.148	122.635	129.732	19.6243	29.1855	41.3985
ENSSSCT00000000230	ENSSSCG00000000215	SMARCD1	5:15992764-16005710	3123	0.0893258	0.246244	0.34483	6.38108e-05	7.6694e-05	0.0219462	1.51826e-06	0.185065	8.05178e-07	0.1224	0.130486	0.130006
ENSSSCT00000000232	ENSSSCG00000000216	ASIC1	5:15965059-15991876	3794	0	0	0	0.0236214	0.0283896	0.0103237	0.00841901	0	0.015179	0.00495576	0.0146546	0.0211441
ENSSSCT00000000233	ENSSSCG00000000217	-	5:15904676-15943608	2888	0.0261776	0.0021518	0.0969435	1.57752e-05	0.541452	0.0836889	0.0886761	1.4072e-05	6.16749e-05	3.08643e-06	1.38363e-05	0.0461483
ENSSSCT00000000235	ENSSSCG00000028516	LARP4	5:16284948-16353555	6662	0.104536	0.286106	0.349593	2.28366	1.2078	1.18515	1.14466	0.640507	1.31866	0.0471325	0.298439	0.159427
ENSSSCT00000000236	ENSSSCG00000000220	-	AEMK02000258.1:188923-217951	5024	0.124214	0.100954	0.339927	0.257218	0.113175	0.267232	0.119847	0.14932	0.395908	0.108237	0.0867723	0.135769
ENSSSCT00000000240	ENSSSCG00000000223	BIN2	AEMK02000258.1:93258-133285	2182	1.1524e-12	5.62946e-09	7.40842e-24	0.0760145	0.162351	0.0829429	0.000162005	0.0938016	0.0862239	1.19176e-21	0.122978	0.00411062
ENSSSCT00000000245	ENSSSCG00000000228	SCN8A	5:16977702-17168445	6001	1.71245e-06	1.25563e-06	0.000129297	2.39079e-07	1.20713e-07	5.73547e-07	0.000751079	2.71075e-08	1.02187e-06	7.54244e-08	1.35452e-06	2.02405e-06
ENSSSCT00000000250	ENSSSCG00000000231	ANKRD33	5:17248663-17250938	984	0	0	0	0	0	3.10637e-06	0	0	0	0	0	0.0430187
ENSSSCT00000000251	ENSSSCG00000000232	ACVRL1	5:17267930-17285874	5873	0.161503	0.115039	0.242013	0.245166	0.335839	0.183973	0.294025	0.1608	0.136325	0.0766451	0.0754177	0.130732
ENSSSCT00000000252	ENSSSCG00000000233	ACVR1B	5:17314275-17350723	4536	0.612525	0.683885	1.33686	1.05051	2.51995	1.96839	0.934398	0.559044	1.12081	0.263415	0.356908	0.460149
ENSSSCT00000000253	ENSSSCG00000000234	GRASP	5:17358041-17367324	3325	0.287934	0.31326	0.967078	0.635135	0.657973	0.523481	0.907984	0.321984	0.309426	0.073965	0.112206	0.163198
ENSSSCT00000000255	ENSSSCG00000000236	KRT75	5:17749943-17760524	1626	8.38581e-05	0	0	0	8.74402e-05	0	0	0	0	0	0	0
ENSSSCT00000000257	ENSSSCG00000000238	-	5:17736038-17747580	1584	0.0125468	0	0	0	0	0	0	0	0	0	0	0
ENSSSCT00000000258	ENSSSCG00000000239	-	5:17635566-17642700	1883	0	6.23916e-13	1.56824e-12	0	0	0.0101907	0	0	0	0	3.95896e-12	0
ENSSSCT00000000259	ENSSSCG00000000240	KRT85	5:17679996-17686602	1473	0	0	0.0269742	0	1.54081e-11	1.36373e-12	1.338e-11	0	0	0	0	0
ENSSSCT00000000266	ENSSSCG00000000247	KRT71	5:17896309-17905110	1557	0	0	0.0015855	0	0.00041664	6.65808e-07	0	0	0	0	0	0
ENSSSCT00000000267	ENSSSCG00000000248	KRT5	5:17860773-17868244	3430	3.80338e-08	0	0.0215144	0	0	0	0	0	0	0	0	0
ENSSSCT00000000270	ENSSSCG00000000251	-	5:18012924-18018582	2403	0.00796617	0	0.0235733	0	0.00769577	0.00780123	0	0	0	0	0	0
ENSSSCT00000000271	ENSSSCG00000000252	KRT8	5:18170353-18180215	3446	4.11713e-59	0	0.0164849	5.08785e-19	0.00638513	1.63976e-15	7.85868e-23	0.0166822	3.93712e-29	5.78404e-15	2.11015e-43	0.00996457
ENSSSCT00000000272	ENSSSCG00000000253	KRT18	5:18217574-18222833	2949	0.0576614	0.0452426	0.082046	0.197289	0.253252	0.16276	0.328681	0.0192426	0.0801578	0	0.050945	0.0127694
ENSSSCT00000000273	ENSSSCG00000000263	TNS2	5:18306452-18320270	4053	2.59408e-05	0.183478	0.336779	0.900502	0.523789	0.367364	0.587531	5.53681e-05	0.240767	0.0112101	0.265042	0.193006
ENSSSCT00000000276	ENSSSCG00000000257	ITGB7	5:18419438-18434340	2852	0	0	0	0	0	0	9.8779e-108	1.43479e-167	5.2792e-76	1.0043e-34	1.60159e-76	0.0181809
ENSSSCT00000000277	ENSSSCG00000000258	RARG	5:18436730-18447618	2962	0.266646	0.152863	0.227416	0.421729	0.281261	0.270985	0.47171	0.294146	0.292158	0.0328644	0.284422	0.136646
ENSSSCT00000000278	ENSSSCG00000000259	CSAD	5:18379346-18409958	2583	0.059499	0.0921324	1.93548e-20	0.0765695	0.225626	0.337944	0.274135	0.0663396	0.163474	0.011972	0.0377077	1.26225e-08
ENSSSCT00000000279	ENSSSCG00000000260	SOAT2	5:18358672-18371264	2227	0.025933	0.0435987	0.183437	0.0250153	0.037059	0.0338948	0.0087147	0.0173397	0.0250263	0	0.0343936	0.00860883
ENSSSCT00000000280	ENSSSCG00000000261	IGFBP6	5:18353170-18357225	1193	5.1883	3.85418	25.1409	13.673	20.9196	13.3057	18.1841	6.48013	9.15912	2.03674	3.88149	5.42906
ENSSSCT00000000281	ENSSSCG00000000262	SPRYD3	5:18293253-18338662	2633	0.870419	0.627675	1.8763	1.76409	2.56181	1.92582	1.58997	1.07883	1.23702	0.421507	0.796537	0.658967
ENSSSCT00000000282	ENSSSCG00000000263	TNS2	5:18306452-18320270	4209	2.67441	1.82718	2.60793	2.18347	1.93888	1.5624	1.50431	1.12924	1.48034	0.554129	0.786326	0.830945
ENSSSCT00000000283	ENSSSCG00000000264	MFSD5	5:18476623-18478737	1741	2.33648e-05	0.000177539	2.708e-05	1.67279e-05	1.58439e-05	0.14436	0.0817441	5.27483e-05	9.95892e-06	6.02059e-06	9.32496e-06	9.61616e-06
ENSSSCT00000000284	ENSSSCG00000000265	ESPL1	5:18487562-18509753	6300	0.0203727	0.00587276	0.0514516	0.186945	0.198325	0.489482	0.291751	0.0784512	0.0446259	0.0440071	0.161813	0.113227
ENSSSCT00000000286	ENSSSCG00000000267	C12orf10	5:18512709-18525879	2042	1.98582	1.7888	9.36788	9.33286	10.9252	11.0533	11.9216	6.15689	6.0863	1.72894	2.41814	2.63995
ENSSSCT00000000287	ENSSSCG00000000268	AAAS	5:18521627-18537864	6505	0.194329	0.0994532	0.544874	0.442768	0.456763	0.552994	0.440387	0.309267	0.272569	0.0681372	0.215298	0.177001
ENSSSCT00000000290	ENSSSCG00000000271	AMHR2	5:18642822-18648848	1730	0.0113802	0.0573919	0.0562914	0.0110099	0.0220856	0.0336003	0	0	0.0330574	0	0.0113299	0.0113247
ENSSSCT00000000291	ENSSSCG00000000272	SP1	5:18589474-18629716	2731	0.382443	0.654736	1.15863	1.05556	0.905461	0.671379	0.195435	0.182915	0.398991	0.504163	0.508057	0.584388
ENSSSCT00000000292	ENSSSCG00000000273	-	5:18660683-18665925	1383	1.53387	1.42906	2.99981	4.08445	5.25267	5.05576	5.79264	4.19573	3.3514	2.77987	3.334	2.2947
ENSSSCT00000000294	ENSSSCG00000000274	PCBP2	5:18676627-18698895	1062	11.2147	9.79005	11.1703	22.9219	18.3318	24.574	15.1197	6.25388	8.23189	5.45709	7.66576	6.74491
ENSSSCT00000000295	ENSSSCG00000000275	MAP3K12	5:18699384-18717199	4247	1.00714e-84	0.0156139	0.0376703	0.0242831	0.0346136	0.0272305	5.78082e-112	0.0176018	0.00862824	0.00042837	1.17032e-143	1.91808e-32
ENSSSCT00000000296	ENSSSCG00000000276	TARBP2	5:18719032-18723839	1493	0.631948	0.475612	3.92101	2.38003	2.15521	2.24869	3.02383	1.7421	1.15271	0.438322	0.77052	0.686229
ENSSSCT00000000298	ENSSSCG00000000277	NPFF	5:18724163-18724826	348	0	0	0.100752	0	0.102481	0.211139	0	0.203367	0	0	0	0
ENSSSCT00000000299	ENSSSCG00000000278	-	5:18728698-18838547	6595	0.21209	0.205743	0.0163988	0.125785	0.310529	0.0635405	0.00084186	0.0269838	7.05032e-11	0.000107806	1.39762e-05	0.0525431
ENSSSCT00000000309	ENSSSCG00000000288	-	5:19484612-19494938	5465	1.20173	1.66354	2.80478	8.81097	6.88278	6.86313	3.94135	2.1538	2.56357	0.913981	1.45859	0.897958
ENSSSCT00000000310	ENSSSCG00000000289	NFE2	5:19494676-19497747	1674	0	0	0	0	0	2.0398e-165	0.0235221	0	7.28642e-298	0	1.59383e-215	0
ENSSSCT00000000311	ENSSSCG00000000290	COPZ1	5:19522612-19542372	2001	3.48333	2.67462	10.1205	9.31558	9.1162	8.9312	7.44543	4.23982	5.08291	1.64688	2.64256	2.52793
ENSSSCT00000000312	ENSSSCG00000000291	GPR84	5:19552812-19554796	1528	0	0.0131721	0	0.0126581	0.0381022	0	0.0132246	0.0394362	0.0253438	0	0	0.0519607
ENSSSCT00000000313	ENSSSCG00000000292	ZNF385A	5:19560318-19577120	2378	0.790489	0.316279	0.554244	0.298541	0.174473	0.713095	0.000121839	0.0983579	0.387798	0.0885705	0.000126831	0.184532
ENSSSCT00000000314	ENSSSCG00000000293	ITGA5	5:19583450-19611209	9021	1.88764	1.20256	3.81391	2.9708	3.47038	2.25372	2.94699	1.05427	0.791542	0.35783	0.950793	0.744548
ENSSSCT00000000316	ENSSSCG00000000295	NCKAP1L	5:19677874-19720547	4697	0.051122	0.023155	0.245302	0.501728	0.5929	0.279409	0.416017	0.213572	0.190885	0.112253	0.228805	0.41522
ENSSSCT00000000318	ENSSSCG00000000297	PDE1B	5:19725353-19752890	3156	7.91741e-06	4.49487e-05	0.0721124	0.349324	0.052866	0.114404	4.76879e-06	3.0228e-05	0.259945	0.000677451	3.58714e-06	0.131201
ENSSSCT00000000319	ENSSSCG00000000298	PPP1R1A	5:19753856-19763269	805	27.1939	21.2432	42.9547	25.9065	38.051	37.159	107.306	76.5167	77.6338	56.6646	91.9384	79.8982
ENSSSCT00000000320	ENSSSCG00000000299	TESPA1	5:19982880-20017425	1835	0.0106638	0	0.010543	0.000830107	0.0691763	1.97675e-07	0.0504366	0.0648967	2.15311e-09	0	8.73818e-07	0.0202709
ENSSSCT00000000332	ENSSSCG00000035492	-	5:20247725-20248670	945	0	0	0	0	0	0	0	0	0	0	0	0.0225705
ENSSSCT00000000339	ENSSSCG00000000318	-	AEMK02000577.1:164561-165488	927	0.0232895	0	0	0	0	0	0.0119127	0	0.0457681	0	0	0
ENSSSCT00000000344	ENSSSCG00000033458	-	5:20372615-20373554	939	0.0382182	0.023119	0.049643	0	0	0.0459091	0	0	0.0300289	0	0	0
ENSSSCT00000000345	ENSSSCG00000037447	-	5:20663067-20663988	921	0.0704192	0.0236652	0.0351974	0.0115043	0.0694231	0.0235162	0	0.023826	0.0115348	0	0	0.0232773
ENSSSCT00000000349	ENSSSCG00000000327	-	5:20534639-20535575	936	0	0	0.0134181	0.00563823	0	0	0	0	0.00753706	0	0	0
ENSSSCT00000000352	ENSSSCG00000034512	-	AEMK02000276.1:111314-112265	951	0	0	0.0451159	0	0	0.0225948	0	0	0.0221706	0	0	0
ENSSSCT00000000354	ENSSSCG00000000332	-	5:20616741-20617680	939	0	0	0.00763739	0	0	0	0	0	0.0500481	0	0	0
ENSSSCT00000000355	ENSSSCG00000000333	-	5:20649766-20650705	939	0	0.00577976	0.0286402	0.0187199	0	0	0	0.00775514	0.00750722	0	0	0
ENSSSCT00000000371	ENSSSCG00000035206	-	AEMK02000497.1:171359-172295	936	0.0115098	0.00580207	0.0517556	0	0	0.0345694	0	0.0311427	0.143204	0	0	0
ENSSSCT00000000374	ENSSSCG00000000352	-	5:20940542-20941470	928	0.0116296	0	0	0	0	0.0116473	0.0118968	0	0	0	0	0
ENSSSCT00000000375	ENSSSCG00000000353	-	5:21039287-21040223	936	0	0.0077361	0	0	0	0	0	0	0	0	0	0
ENSSSCT00000000381	ENSSSCG00000000359	-	5:21156856-21160737	558	11.6647	8.85853	27.0974	33.8589	36.6841	39.9889	39.407	19.6487	25.8171	5.53906	10.3865	12.0716
ENSSSCT00000000384	ENSSSCG00000000362	RDH5	5:21166903-21170897	1238	0.0994356	0.0334248	0.19762	0.0644934	0.113334	0.0821735	0.336802	0.08364	0.129195	0	0	0.065868
ENSSSCT00000000386	ENSSSCG00000000363	GDF11	5:21191189-21201804	4387	0.0760937	0.0597097	0.0831323	0.0933474	0.0934779	0.0823514	0.114569	0.0337994	0.0608664	0.0213044	0.0419892	0.0505857
ENSSSCT00000000387	ENSSSCG00000000364	SARNP	5:21206603-21288580	1372	0.713851	1.28094	3.5304	6.62873	6.29133	4.19961	5.58124	3.45125	3.70081	1.02593	1.28811	1.19566
ENSSSCT00000000388	ENSSSCG00000000365	-	5:21262192-21264685	966	0.690067	0.558772	1.54132	3.47327	3.02622	3.47947	2.54696	0.546399	0.682679	0.467052	0.399007	0.458704
ENSSSCT00000000389	ENSSSCG00000000366	DNAJC14	5:21265664-21272646	2114	2.06658	1.63261	4.89815	6.76019	6.77702	6.02796	4.78687	2.96348	3.73502	1.16991	2.10142	1.62076
ENSSSCT00000000390	ENSSSCG00000000367	-	5:21274045-21279335	2345	1.49937e-07	1.25162e-13	8.35793e-06	0.0567748	9.14449e-07	5.18096e-08	1.25725e-06	1.76983e-07	0.0423185	9.06538e-32	3.63338e-06	3.83151e-06
ENSSSCT00000000391	ENSSSCG00000000368	MMP19	5:21278080-21286073	3873	0.429023	0.242597	1.09011	2.23786	2.32231	1.54648	1.54831	0.388349	0.577839	0.184309	0.430293	0.321848
ENSSSCT00000000393	ENSSSCG00000000370	DGKA	5:21336805-21355481	2575	8.75193e-07	0.0747153	0.221301	0.213899	0.373539	0.403586	0.353478	0.192746	0.213263	0.0820051	1.02159e-12	0.228507
ENSSSCT00000000394	ENSSSCG00000000371	PMEL	5:21355618-21364987	2046	0.00947381	0.00955616	0.0187139	0.0823203	0.0550209	0.04649	0.0382355	0.0190162	0.0183037	0.00954367	0	0
ENSSSCT00000000398	ENSSSCG00000000373	CDK2	5:21364386-21371310	3601	1.20101e-206	0.0101112	0.018119	0.0239326	0.0393653	0.0506635	2.05962e-211	0.0407106	0.00812988	0.0086679	9.94046e-259	0.0179579
ENSSSCT00000000399	ENSSSCG00000000374	RPS26	5:21431658-21434295	1303	0.0154799	0.0962526	7.84569e-06	0.395382	4.63683e-05	0.157668	8.26029e-07	8.11024e-06	0.000159735	0.0718621	0.0309435	0.160797
ENSSSCT00000000402	ENSSSCG00000000376	SUOX	5:21395265-21399719	2148	0.609905	0.53875	1.22244	4.05893	3.34185	3.48021	5.37678	3.53926	2.14932	0.971855	1.71247	1.37049
ENSSSCT00000000403	ENSSSCG00000000377	-	5:21496024-21504095	2539	3.40627	2.33537	8.78676	8.83642	7.1915	6.61853	5.14538	3.81359	5.88907	1.16418	1.95513	1.00377
ENSSSCT00000000405	ENSSSCG00000000379	ESYT1	5:21518069-21534463	3159	0.309612	0.000230342	0.642486	1.3542	0.00055291	1.44997	0.606034	1.41171	1.37702	0.666382	0.685615	1.39782
ENSSSCT00000000407	ENSSSCG00000039506	-	5:21554350-21558992	1230	4.72161	2.33161	14.5782	21.5429	8.27716	37.3761	6.78864	2.72263	2.40466	0.386804	1.33523	2.10684
ENSSSCT00000000408	ENSSSCG00000039795	MYL6	5:21559298-21562418	696	18.9503	14.66	62.0617	75.8357	77.8947	90.4452	103.328	36.4273	28.3024	10.1389	20.2287	19.1632
ENSSSCT00000000409	ENSSSCG00000039795	MYL6	5:21559480-21562417	1475	0.275406	0.115752	0.588277	0.237796	0.417498	0.183405	0.369142	0.178778	0.0371926	0.0986471	0.0753905	0.0189638
ENSSSCT00000000410	ENSSSCG00000000382	SMARCC2	5:21563402-21586700	4834	0.248127	0.299863	1.13166e-13	0.784601	0.937242	0.000236434	0.181687	0.221858	1.09137	0.0712591	0.105427	0.459812
ENSSSCT00000000411	ENSSSCG00000000383	RNF41	5:21596844-21624559	3190	0.556092	0.471904	0.84286	2.23012	1.06977	2.25186	0.77021	0.940515	0.796936	5.96632e-05	0.265492	0.284969
ENSSSCT00000000412	ENSSSCG00000000384	NABP2	5:21624142-21634412	4504	0.324816	0.310587	0.996215	0.915856	0.786759	0.939274	0.681938	0.18457	0.395875	0.0978404	0.190588	0.225363
ENSSSCT00000000413	ENSSSCG00000000385	SLC39A5	5:21631963-21637655	2039	0	0	4.32301e-06	2.50845e-97	4.10021e-06	4.40376e-05	1.26605e-13	0	0	0	0	0
ENSSSCT00000000414	ENSSSCG00000000386	ANKRD52	5:21637612-21657092	6877	0.953274	9.32309e-05	1.97412	1.58177	1.16878	1.51549	0.868284	1.01104	1.58903	0.15871	0.208091	0.870531
ENSSSCT00000000419	ENSSSCG00000039506	-	5:21555071-21558988	866	75.503	50.3116	161.478	321.431	122.833	537.746	44.7884	15.8294	8.87808	7.83715	7.00441	13.8173
ENSSSCT00000000424	ENSSSCG00000000393	PAN2	5:21712874-21727016	3600	1.0025e-05	0.0607412	5.48888e-05	1.11776e-05	5.14551e-06	0.000375301	6.73624e-06	7.33107e-06	8.79729e-05	0.00427919	8.66655e-06	0.0266745
ENSSSCT00000000425	ENSSSCG00000000394	-	5:21707833-21711292	1232	1.61271	1.41908	6.47998	5.75708	5.81449	6.15448	6.15099	2.87681	2.95667	0.83557	1.31017	1.59538
ENSSSCT00000000428	ENSSSCG00000000396	STAT2	5:21733029-21751354	5641	0.430466	0.454572	1.52551	3.03434	3.75498	2.52059	3.2595	1.12344	2.09538	0.546961	0.467882	1.51243
ENSSSCT00000000430	ENSSSCG00000000398	APOF	5:21759474-21760815	1202	0	1.0975e-06	3.00996e-08	2.10687e-07	1.36525e-07	0.0475306	4.98268e-07	4.11279e-07	5.13308e-07	0.0409203	1.46e-08	5.22167e-07
ENSSSCT00000000431	ENSSSCG00000000399	TIMELESS	5:21759474-21787521	4994	0.0480562	0.0484838	0.279746	0.205725	0.149164	0.382112	0.430192	0.291737	0.251765	0.0284259	0.168869	0.14747
ENSSSCT00000000432	ENSSSCG00000000400	MIP	5:21787825-21793592	2246	0.00856563	0.0172807	0.0169068	0	0	0	0	0	0	0	0	0
ENSSSCT00000000433	ENSSSCG00000000401	GLS2	5:21806406-21819656	2667	0.0498918	0.0143797	0.0556661	0	0	0.0418281	0.00717468	0.0214192	0.0205965	0.00718167	0	0.00710129
ENSSSCT00000000434	ENSSSCG00000000402	RBMS2	5:21870849-21927830	1146	4.23541e-07	0.124395	0.0927842	0.32081	3.44773e-08	0.0954661	0.346847	0.288538	0.000987032	3.72155e-05	0.000342847	0.146121
ENSSSCT00000000436	ENSSSCG00000000403	BAZ2A	5:21933280-21982837	8973	0.333531	0.177136	0.54416	0.745387	0.304824	0.486683	0.000934934	0.112323	0.437278	0.350179	0.169355	0.000135709
ENSSSCT00000000438	ENSSSCG00000000405	-	5:21984753-21992302	1669	131.026	102.879	471.186	506.356	616.937	681.421	264.203	170.295	214.882	54.0158	93.3909	91.8696
ENSSSCT00000000439	ENSSSCG00000000406	PTGES3	5:22000339-22021662	1954	7.56927	9.10163	14.7219	14.9987	12.1255	14.0856	14.8344	8.64958	9.75193	4.13339	6.98717	5.83992
ENSSSCT00000000442	ENSSSCG00000026055	PRIM1	5:22064255-22089390	1550	0.0654207	0.0815181	0.0699147	0.247077	0.600229	0.373413	0.587139	0.129779	0.497828	0.0367768	0.000427965	1.21302e-05
ENSSSCT00000000443	ENSSSCG00000040435	STAT6	5:22406396-22422398	4057	0.518154	0.637421	1.70845	2.03758	2.70702	1.01907	0.92793	0.0022369	0.744703	0.149224	0.394597	0.496622
ENSSSCT00000000445	ENSSSCG00000000411	NAB2	5:22400547-22410479	6380	0.156267	3.74269e-05	1.62041e-09	0.000105406	0.0466513	1.45256e-26	2.01451e-23	1.35394e-67	0.00147983	0.0350516	0.00472771	5.09262e-06
ENSSSCT00000000446	ENSSSCG00000025542	NEMP1	5:22370689-22390132	2021	0.153617	0.164636	0.218125	0.2225	0.408973	0.329862	0.280966	0.202373	0.250457	0.0677021	0.133742	0.0860316
ENSSSCT00000000447	ENSSSCG00000000413	MYO1A	5:22337905-22362433	3683	7.87531e-13	0.0204604	1.07189e-06	0.00974061	0.00975593	0.0194744	6.37514e-07	1.67239e-06	1.65989e-05	0.0102161	0	0.0101054
ENSSSCT00000000448	ENSSSCG00000000419	RDH16	5:22251752-22285044	1722	2.65469e-08	7.82497e-09	0.0198906	0.000198921	9.51956e-07	8.56527e-06	0.0634679	4.5576e-06	0.105561	5.76169e-07	0.0257109	0.0542668
ENSSSCT00000000449	ENSSSCG00000000415	SDR9C7	5:22228041-22244086	1643	0	0.0121513	0.0596271	0.0699839	0.0117006	0.0118686	0	0	0.0817247	0	0.035991	0.0239731
ENSSSCT00000000452	ENSSSCG00000000418	TAC3	5:22324930-22332815	762	0	0	0	0	0	0	0	0	0	0	0.0297153	0
ENSSSCT00000000453	ENSSSCG00000000419	RDH16	5:22261961-22282978	1201	0.062975	0.0161836	0.0835259	1.86895e-259	0.0715161	0.00315156	0.19007	0.243994	1.28328	0.0249198	0.176421	0.0130951
ENSSSCT00000000458	ENSSSCG00000000413	MYO1A	5:22338029-22360018	3156	3.78738e-05	2.38974e-25	1.29566e-08	9.79673e-24	1.65394e-23	0.000366035	9.53629e-10	0.0775946	1.16414e-14	1.30237e-23	0	0
ENSSSCT00000000460	ENSSSCG00000000411	NAB2	5:22401337-22406420	2269	0.784462	1.00132	2.5533	3.60981	1.09162	1.29375	1.71808	0.528718	0.79069	0.135658	0.299289	0.355226
ENSSSCT00000000461	ENSSSCG00000040435	STAT6	5:22406135-22421630	4281	0.836872	0.695666	1.86835	2.49527	1.06403	1.38524	1.6691	1.17672	0.607227	0.0998489	0.393536	0.460128
ENSSSCT00000000464	ENSSSCG00000000444	DCTN2	5:22799439-22814480	1513	4.55867	2.92453	10.0507	16.9473	16.2816	13.6084	12.1366	6.96434	7.82019	1.34603	2.97208	2.64277
ENSSSCT00000000465	ENSSSCG00000000431	MBD6	5:22793363-22798234	3006	0.583902	0.443367	0.44526	0.434951	0.375235	0.325076	0.258909	0.138272	0.247704	0.113884	0.193451	0.21274
ENSSSCT00000000467	ENSSSCG00000000433	B4GALNT1	5:22889661-22897206	2525	0.0327157	0.0825243	1.37212e-05	7.15529e-07	0.00104612	3.22891e-06	4.84703e-06	0.03869	2.96044e-05	0.0515334	2.4956e-06	0.0741505
ENSSSCT00000000470	ENSSSCG00000000435	ARHGEF25	5:22873333-22881570	3464	0.406608	0.374666	1.14226	1.8605	1.8675	1.2777	1.14037	0.371317	0.667557	0.130224	0.208269	0.137829
ENSSSCT00000000471	ENSSSCG00000000436	PIP4K2C	5:22854284-22868453	4308	0.0346636	0.0192231	0.0172879	0.076692	0.0663364	0.0796532	0.185601	0.17643	0.143975	0.0637006	0.0325724	0.0784982
ENSSSCT00000000472	ENSSSCG00000000437	ARHGAP9	5:22744636-22755159	5485	0.0637602	0.0270857	0.105508	0.0933443	0.128906	0.173018	0.131254	0.0468151	0.200774	0.0177271	0.08997	0.0758877
ENSSSCT00000000473	ENSSSCG00000000437	ARHGAP9	5:22747574-22756137	2441	2.48471e-110	9.89026e-16	2.27413e-51	4.99473e-15	1.04941e-49	3.5286e-52	1.63622e-08	0.0473562	0.125391	0.0217786	3.11843e-20	0.049376
ENSSSCT00000000474	ENSSSCG00000000439	KIF5A	5:22816876-22851971	5520	7.0799e-12	0.0225767	0.0413633	0.000220909	0.00267802	2.84695e-92	7.9822e-05	0.000136638	3.8983e-05	1.83554e-208	4.845e-60	4.61197e-09
ENSSSCT00000000476	ENSSSCG00000000435	ARHGEF25	5:22873333-22881530	3328	1.40241e-11	0.137691	0.184967	0.495615	0.113673	0.313785	3.55242e-12	1.17136e-05	0.083535	1.48498e-12	1.74123e-05	0.15626
ENSSSCT00000000477	ENSSSCG00000000442	INHBE	5:22732797-22734083	1032	0.000417402	0	0.0140308	0.0184565	0.0107483	0.0538168	0.233119	7.96288e-48	0.089444	0	1.2247e-45	0.0159379
ENSSSCT00000000478	ENSSSCG00000000443	GLI1	5:22736954-22748001	4276	7.15957e-19	1.55943e-24	0.0257849	9.88843e-08	3.26617e-09	0.0259456	0.0131565	2.35447e-08	0.00794196	0.00437572	0.00116804	0.00447575
ENSSSCT00000000479	ENSSSCG00000000444	DCTN2	5:22799286-22814363	1768	6.94213	5.77632	21.0215	22.8369	25.6665	22.8207	18.1519	10.5306	12.1829	3.00797	4.34773	4.4539
ENSSSCT00000000484	ENSSSCG00000000449	DTX3	5:22869296-22873407	2026	0.13216	0.100144	0.376467	0.759566	0.498815	0.0613828	0.359823	0.077627	0.325406	0.101082	0.0826781	0.144424
ENSSSCT00000000486	ENSSSCG00000038732	AGAP2	5:23017458-23033395	2427	0.199833	0.0589395	0.1314	0.3566	0.14918	0.242653	0.395709	0.0696388	0.301756	0.0025009	0.232842	0.095249
ENSSSCT00000000489	ENSSSCG00000000453	ATP23	5:23233853-23276036	1404	0.272873	0.231744	1.06832	1.49148	2.43428	1.66095	0.97561	0.897174	1.15843	0.202446	0.400738	0.314145
ENSSSCT00000000491	ENSSSCG00000000455	LRIG3	5:24066622-24117971	4082	0.184191	0.340076	0.656772	2.18961	1.86828	1.76727	0.814277	0.762559	0.827254	0.165312	0.194612	0.281643
ENSSSCT00000000492	ENSSSCG00000000456	SLC16A7	5:24749529-24877213	6982	0.184563	0.233216	0.339837	2.60459	1.62736	0.872919	0.64095	0.285636	0.315237	0.0876789	0.110012	0.206983
ENSSSCT00000000493	ENSSSCG00000000457	USP15	5:26964787-27083336	5570	0.710383	0.592792	2.30329	4.85892	5.07671	4.84643	4.21523	3.19902	3.92236	0.755217	0.849537	1.11758
ENSSSCT00000000494	ENSSSCG00000000458	MON2	5:27126135-27241716	6736	0.362551	0.2129	0.292593	0.431793	0.542351	0.525532	0.513222	0.689542	0.136532	0.225138	0.00226421	4.20901e-05
ENSSSCT00000000500	ENSSSCG00000000462	RXYLT1	5:28247411-28276283	1666	0.247613	0.29276	1.35763	3.60206	3.28718	2.89257	3.27561	2.01926	2.75887	0.430105	0.646682	0.296724
ENSSSCT00000000504	ENSSSCG00000000466	XPOT	5:28831988-28851021	2387	1.20929	0.316775	2.10862	1.73205	1.14334	1.52593	1.08763	1.95006	4.68666	0.264547	0.385174	0.332941
ENSSSCT00000000507	ENSSSCG00000000469	LEMD3	5:29595882-29670665	3088	0.933857	0.673021	2.68183	2.69594	2.99597	2.52275	2.33265	1.56221	1.42779	0.247149	0.615049	0.492328
ENSSSCT00000000511	ENSSSCG00000000473	-	5:30488064-30511550	3328	0.445594	0.534883	1.22158	2.9991	2.72717	2.43324	3.74187	2.09937	2.32661	0.341054	0.454002	0.534107
ENSSSCT00000000513	ENSSSCG00000000475	IRAK3	5:30560072-30598954	1572	0.00110163	4.65205e-05	0.00107468	2.56173e-05	5.12462e-05	3.31421e-05	2.06815e-05	2.11227e-05	0.00011535	0.0010997	3.42503e-05	0.00109207
ENSSSCT00000000515	ENSSSCG00000000477	HELB	5:30645655-30690734	2838	0.190539	0.21291	0.638879	0.839602	1.0844	0.660841	0.711052	0.326014	0.54303	0.206367	0.283286	0.227308
ENSSSCT00000000516	ENSSSCG00000000478	GRIP1	5:30698585-31020436	3450	4.30664e-09	2.156e-11	2.0806e-05	1.03148e-07	6.153e-09	1.7099e-05	1.23928e-12	1.85437e-09	0	0	5.993e-09	1.68424e-08
ENSSSCT00000000517	ENSSSCG00000028869	CAND1	5:31657500-31699839	8888	0.33852	0.204647	0.783276	1.74416	1.5806	1.4659	1.29547	0.777182	1.09981	0.134318	0.186949	0.231015
ENSSSCT00000000520	ENSSSCG00000000482	IL22	5:32599300-32604736	1682	0	0	0	0	0	0.0115593	0	0	0	0	0	0
ENSSSCT00000000521	ENSSSCG00000000483	-	5:32644708-32673639	2142	0.000376727	0.000385367	0.0494151	0.38946	0.57397	0.58818	0.314216	0.000377838	0.0371157	0.000397157	5.61427e-08	0.134626
ENSSSCT00000000524	ENSSSCG00000000486	NUP107	5:32989780-33040561	3184	0.555445	0.548423	1.05894	2.90411	2.78969	3.01741	2.10906	1.10581	1.64819	0.244143	0.411065	0.359255
ENSSSCT00000000525	ENSSSCG00000000487	SLC35E3	5:33049238-33068198	3953	0.0942219	0.0807986	0.356825	0.330345	0.258328	0.427044	0.449448	0.36739	0.411745	0.0854664	0.112321	0.140913
ENSSSCT00000000526	ENSSSCG00000000488	MDM2	5:33105736-33164514	1874	0.360726	5.14743e-10	1.09032	2.96072	2.01897	1.80296	2.10714	1.51343	0.781207	0.0441042	0.998649	1.0757
ENSSSCT00000000530	ENSSSCG00000000492	LYZ	5:33612592-33618953	1264	0	0.0489574	0.0160752	0.283268	1.84875	0.320772	0.11506	0.179619	0.141854	0.0814532	0.145225	0.160811
ENSSSCT00000000531	ENSSSCG00000000493	FRS2	5:33725465-33848798	1786	1.58102e-17	2.99771e-12	3.20086e-63	1.58061e-14	5.73931e-12	1.94887e-24	0.0360471	2.53855e-37	0.0160287	1.4241e-59	1.33108e-34	1.02432e-38
ENSSSCT00000000535	ENSSSCG00000000496	CCT2	5:33858638-33875661	3937	3.42055	3.4461	13.9381	22.9181	20.24	19.3773	11.9254	6.95333	8.61986	1.46862	2.73535	2.4151
ENSSSCT00000000538	ENSSSCG00000000499	BEST3	5:33914946-33956536	3167	0.383909	0.372609	0.89323	0.719729	0.517678	0.523989	0.447261	0.459921	0.384586	0.169382	0.265991	0.183244
ENSSSCT00000000539	ENSSSCG00000000500	-	5:34003188-34053892	1826	5.08358e-05	0.203904	0.591006	1.0129	0.50669	0.412095	0.605412	0.480148	0.867587	2.05263e-06	0.130272	2.81831e-05
ENSSSCT00000000541	ENSSSCG00000000502	CNOT2	5:34498251-34548253	1737	0.247244	0.0603588	1.1264	0.37154	0.270674	0.920995	0.530242	0.0017767	0.358249	0.251946	0.186793	0.357794
ENSSSCT00000000543	ENSSSCG00000000504	PTPRB	5:34658539-34758909	9648	0.384348	0.253316	0.83395	2.84272	2.60794	1.6702	1.93966	1.56147	0.935684	0.302068	0.380476	0.383689
ENSSSCT00000000547	ENSSSCG00000000509	ZFC3H1	5:35617265-35671149	6704	4.96182e-06	1.11545e-05	0.0422226	0.0438942	0.0590325	0.249137	8.11192e-05	0.17971	3.69514e-06	0.0241722	4.37723e-05	8.00585e-05
ENSSSCT00000000548	ENSSSCG00000000509	ZFC3H1	5:35617260-35671191	6973	0.736628	0.729875	1.82486	2.10067	2.45367	1.75322	1.24862	0.778484	1.49245	0.378571	0.572912	0.563157
ENSSSCT00000000549	ENSSSCG00000000510	TMEM19	5:35692337-35717908	2753	0.0576697	8.59641e-05	0.0956694	0.0194576	0.000112025	0.353858	0.861308	0.802317	0.342968	0.124096	0.0913743	3.79845e-05
ENSSSCT00000000551	ENSSSCG00000000512	TBC1D15	5:35827472-35907117	3064	0.235729	0.360035	0.517416	3.56957	2.88555	2.18533	1.66841	0.954192	1.14538	0.21572	0.302036	0.18765
ENSSSCT00000000553	ENSSSCG00000021122	TPH2	5:35918568-36015774	1476	0.0135762	0.0273843	0.0403681	0.0658272	0.0264227	0	0	0	0	0	0	0
ENSSSCT00000000555	ENSSSCG00000000515	TRHDE	5:36274363-36656344	3135	4.77975e-05	0.00015048	5.58181e-08	0.000148933	0.0405104	4.45217e-07	4.77784e-05	0.00415737	0.0157986	4.76171e-05	0	0
ENSSSCT00000000557	ENSSSCG00000000516	KCNC2	5:38327367-38531160	2053	0.0329687	0.0382629	0.0205065	2.39155e-26	6.92736e-32	0.012994	0	0.00946503	0	0	0	0
ENSSSCT00000000558	ENSSSCG00000000516	KCNC2	5:38336738-38531160	2252	2.08021e-07	3.38336e-07	7.66078e-06	0.11087	0.0153192	1.5697e-06	0	6.92526e-06	0	0	0	0
ENSSSCT00000000559	ENSSSCG00000000517	CAPS2	5:38578538-38625088	2607	1.29708e-29	0	9.39629e-102	0	2.27697e-08	0.00714407	0.0183824	0.0146297	0	2.16638e-32	0	0
ENSSSCT00000000561	ENSSSCG00000000519	GLIPR1	5:38767157-38813313	3894	5.80104e-114	3.78259e-35	1.63246e-27	1.11093e-37	2.20131e-20	1.23308e-35	0.0392357	1.14532e-40	1.03552e-102	6.47435e-79	7.11719e-153	0.0595174
ENSSSCT00000000563	ENSSSCG00000000521	PHLDA1	5:39314594-39315761	1167	0.425777	0.42935	0.247056	0.311069	0.381882	0.493453	0.830212	0.358479	0.571313	0.071426	0.141591	0.211461
ENSSSCT00000000564	ENSSSCG00000000522	NAP1L1	5:39328052-39363711	4549	0.357336	0.358625	0.920566	2.83871	2.29445	1.87355	1.45903	0.483715	1.6646	2.38035e-05	0.115468	0.0820101
ENSSSCT00000000565	ENSSSCG00000000523	BBS10	5:39562061-39566329	3838	0.170043	0.107831	0.21986	0.606773	0.476815	0.440489	0.312298	0.131165	0.296352	0.0734476	0.0579193	0.0629689
ENSSSCT00000000566	ENSSSCG00000027503	OSBPL8	5:39572510-39648018	2512	0.0890517	9.17772e-09	1.13822	0.0014356	0.675633	0.78922	0.556674	0.455809	0.00720337	0.0232042	0.000727551	0.226266
ENSSSCT00000000569	ENSSSCG00000000527	SYT10	5:40872082-40934296	2090	0	0	0	0	0	0.00908321	0.00933899	0	0	0	0	0
ENSSSCT00000000570	ENSSSCG00000000528	PKP2	5:41424794-41509779	4943	0.0261523	0.0226158	0.0587508	0.0430193	0.122045	0.160001	0.131188	0.156759	0.089599	0.0301263	0.0185513	0.0447121
ENSSSCT00000000571	ENSSSCG00000000529	DNM1L	5:41569850-41635908	5149	0.163538	0.183265	0.000268241	1.42682	1.22161	1.24478	0.000128228	0.231132	0.36009	0.170804	5.52269e-10	0.155785
ENSSSCT00000000572	ENSSSCG00000000530	FGD4	5:41681452-41806431	2592	0.198527	0.272561	0.340842	0.305107	0.814135	0.330455	0.529875	0.562767	0.500744	0.0529171	0.051708	0.284624
ENSSSCT00000000573	ENSSSCG00000000531	BICD1	5:41937876-42143695	2986	0.125976	0.0698098	4.39755e-06	0.0202593	0.000950496	1.15277e-06	0.00215496	0.053409	0.0358679	0.0277221	0.0956549	0.0340733
ENSSSCT00000000576	ENSSSCG00000000534	IPO8	5:43099744-43182797	5374	0.544644	0.490062	0.922502	1.51712	1.30018	2.4287	1.42526	1.06923	1.49598	0.107736	0.581943	0.464297
ENSSSCT00000000578	ENSSSCG00000000536	ERGIC2	5:44334179-44385313	5515	0.271563	0.277838	0.769422	2.03153	2.04278	1.75337	2.35763	1.88027	1.92251	0.272879	0.382445	0.332739
ENSSSCT00000000582	ENSSSCG00000000540	OVCH1	5:44228206-44311394	3702	0.0100808	0.01017	0.0347374	0.0290776	0.0339785	0.0245886	0.0101266	0.0252165	0.014533	0	0.0250521	0
ENSSSCT00000000584	ENSSSCG00000000541	FAR2	5:44386831-44558993	3672	0.0309471	5.60782e-10	0.0754161	0.0712986	0.106031	0.0645825	0.0226215	3.77048e-06	0.0569301	1.23636e-09	0.0228543	0.0198215
ENSSSCT00000000586	ENSSSCG00000024232	CCDC91	5:45167083-45443134	1236	0.0774319	0.217559	0.06934	0.0793961	0.0716801	0.0979004	0.388282	0.231041	0.675204	0.362377	0.132644	0.285948
ENSSSCT00000000588	ENSSSCG00000000545	KLHL42	5:45933927-45954876	3258	0.27522	0.216443	0.528743	1.46642	0.999979	1.0532	0.770664	0.523361	0.503061	0.0988136	0.131907	0.157883
ENSSSCT00000000589	ENSSSCG00000000546	MANSC4	5:45955089-45970274	2354	0.0880453	0.00959451	0.222939	0.116343	0.249075	0.206386	0.0948625	0.0415064	0.0769814	0.0185106	0.0201595	0.0267773
ENSSSCT00000000590	ENSSSCG00000000547	MRPS35	5:45973071-46023094	2588	0.337052	0.58755	1.67264	3.34995	3.23915	2.46976	2.51095	1.5812	2.4124	0.425302	0.477872	0.560375
ENSSSCT00000000592	ENSSSCG00000000549	PPFIBP1	5:46031402-46222850	5123	0.933695	0.885401	2.28713	4.5017	3.38454	6.76472	3.93172	5.45838	7.21663	0.866994	0.942692	1.35948
ENSSSCT00000000594	ENSSSCG00000000551	ARNTL2	5:46330521-46441444	1758	0.0558977	0.0225473	0.0774072	8.92438e-05	0.0867651	0.0740724	0.14925	0.0795202	1.15303e-06	0.0337766	0.0333838	0.066755
ENSSSCT00000000595	ENSSSCG00000000552	MED21	5:46730209-46736376	943	0.6616	1.49507	5.82358	8.71508	8.6066	9.17901	9.36601	4.28172	5.33201	0.940987	1.55025	1.28978
ENSSSCT00000000596	ENSSSCG00000000553	TM7SF3	5:46740930-46784194	4250	0.270148	0.203132	0.420597	0.550612	0.796483	1.20969	0.95372	0.687792	0.662613	0.118883	0.348288	0.39308
ENSSSCT00000000597	ENSSSCG00000000554	FGFR1OP2	5:46793136-46824064	3927	0.0937332	0.200637	0.710496	1.76649	1.44181	2.0122	1.42476	1.02746	1.18051	0.117648	0.423332	0.29482
ENSSSCT00000000598	ENSSSCG00000000555	ITPR2	5:46936380-47388975	7350	0.650506	0.724692	1.77137	2.372	2.24789	3.08586	2.32756	2.69501	1.93449	0.711613	0.741804	0.800537
ENSSSCT00000000602	ENSSSCG00000000559	RASSF8	5:47733844-47848475	1760	0.81162	0.572671	1.47401	5.48593	3.21225	2.73054	1.03853	2.01508	2.19238	0.61522	0.797775	0.382867
ENSSSCT00000000606	ENSSSCG00000000563	LRMP	5:48649342-48680612	1350	0	3.81422e-44	3.06531e-75	1.87439e-18	1.86996e-20	2.7001e-48	7.32737e-12	0.0604891	3.29794e-11	1.72123e-46	9.90695e-36	3.90073e-28
ENSSSCT00000000609	ENSSSCG00000000567	SOX5	5:49757948-50161468	2699	0.125835	0.128889	0.0735261	0.901099	0.216029	0.220696	0.147346	0.129959	0.209047	2.51511e-07	0.0691112	0.044564
ENSSSCT00000000610	ENSSSCG00000000567	SOX5	5:49749764-50161028	2305	0.117616	0.233976	0.449867	0.749969	0.438947	0.625209	0.161183	0.238584	0.153957	0.100709	0.0838607	0.0219413
ENSSSCT00000000613	ENSSSCG00000000570	C2CD5	5:51040886-51132282	4226	0.0348102	0.0488326	0.166531	0.673401	0.856955	0.578155	0.2986	0.484456	0.108272	0.0423812	0.176671	7.96537e-41
ENSSSCT00000000614	ENSSSCG00000000571	ABCC9	5:51538159-51669598	4883	3.31426	2.78177	8.0742	5.50291	11.2893	8.56851	6.48412	4.13656	3.51591	1.71563	1.66999	1.99384
ENSSSCT00000000616	ENSSSCG00000000573	KCNJ8	5:51695973-51707039	5062	0.441088	0.430304	1.48316	1.48997	1.70198	2.21373	1.84309	0.506169	0.573439	0.180046	0.343908	0.236318
ENSSSCT00000000620	ENSSSCG00000000576	-	5:51810966-51831490	1607	25.0107	23.187	85.1926	181.3	178.425	252.297	43.668	21.3754	30.2893	6.65624	10.5709	15.0482
ENSSSCT00000000621	ENSSSCG00000000577	GYS2	5:51852975-51915075	2170	0	0	0	0.0370502	0	0	5.36045e-07	0	3.9786e-07	0	0.00295295	0.0259317
ENSSSCT00000000623	ENSSSCG00000000579	GOLT1B	5:51939479-51953314	3010	0.558004	0.480695	1.24744	2.45521	2.49601	2.35806	2.72417	1.58789	1.56858	0.429624	0.554609	0.468622
ENSSSCT00000000624	ENSSSCG00000000580	RECQL	5:51953183-51995514	3086	0.109067	0.0490771	0.346621	0.774312	0.513602	0.56986	0.760211	0.45124	0.42635	0.0423106	0.127908	0.168818
ENSSSCT00000000626	ENSSSCG00000000582	IAPP	5:52046788-52049999	273	0	0.0123525	0	0	0	0	0	0	0	0	0	0
ENSSSCT00000000627	ENSSSCG00000000583	PYROXD1	5:51993953-52021439	3971	0.131288	0.260173	0.645696	1.76549	1.86737	1.54467	1.35607	0.843804	0.806069	0.13232	0.237554	0.205698
ENSSSCT00000000629	ENSSSCG00000000584	SLCO1A2	5:52081031-52131762	4968	0.0420181	0.047658	0.0552383	2.51359e-15	2.48055e-47	5.10537e-28	5.55418e-06	0.000243017	0.113497	0	0	0
ENSSSCT00000000630	ENSSSCG00000000585	SLCO1C1	5:52234397-52315026	2933	0	0	0	0.0123992	0.0434865	0	0.0194431	0	0	0	0	0.00641833
ENSSSCT00000000632	ENSSSCG00000000587	AEBP2	5:53617357-53691547	4499	0.55683	0.687572	0.829972	4.00442	3.26209	3.67081	2.10288	1.97037	2.24896	0.314135	0.341507	0.368417
ENSSSCT00000000633	ENSSSCG00000000588	PLEKHA5	5:53760822-54016833	4296	0.180304	0.123693	0.289125	0.675051	0.350876	0.246687	0.338423	0.410663	0.31347	0.00274368	0.151384	0.0101031
ENSSSCT00000000635	ENSSSCG00000000590	PLCZ1	5:54408291-54452417	2135	0	0	0	0	0	0.00887357	0	0	0	0	0	0
ENSSSCT00000000636	ENSSSCG00000000591	PIK3C2G	5:54474621-54849512	5450	0.0101329	0.0102232	0.0232319	0.0210204	0.0194634	0.0164298	0.00677459	0.00674635	0	0.00340394	0.013416	0.0101067
ENSSSCT00000000638	ENSSSCG00000000593	-	5:54866756-54868297	1044	0	0	0	1.51336e-05	0	0	0	0	0	0	0	0
ENSSSCT00000000642	ENSSSCG00000036499	LMO3	5:55895126-56116003	754	0	0	0	0	8.41512e-15	0	0	0	0.00665358	0	0	0
ENSSSCT00000000643	ENSSSCG00000000598	SLC15A5	5:56345870-56429067	1713	0	0.0116039	0	0	0	0	0	0	0	0	0	0
ENSSSCT00000000644	ENSSSCG00000000599	DERA	5:56590979-56706483	1779	0.658628	0.449635	2.56662	2.06402	2.20202	1.96096	2.8647	1.64458	2.47161	0.411255	0.548203	0.601317
ENSSSCT00000000645	ENSSSCG00000000600	EPS8	5:56898940-57005114	3707	4.63797e-06	1.69009e-05	0.0803231	0.502666	0.692478	0.477511	2.07831e-05	2.41793e-05	0.031833	2.74663e-06	1.39605e-05	0.0196527
ENSSSCT00000000646	ENSSSCG00000000601	PTPRO	5:57021177-57263405	5352	3.35562e-05	0	1.11164e-07	1.19556e-06	7.58695e-06	3.07139e-05	0.0283915	2.22321e-06	0.0031816	3.31108e-05	6.68324e-12	3.28811e-05
ENSSSCT00000000647	ENSSSCG00000000602	RERG	5:57349381-57462804	2263	0.14493	0.169773	0.517338	3.72023	2.45588	3.99268	0.96409	0.517956	0.54709	0.127035	0.0545638	0.166235
ENSSSCT00000000651	ENSSSCG00000000605	ERP27	5:57600410-57628157	3108	0	0.00611474	0.0179073	0	0.00584116	0	0	0	0	0.00626857	0	0
ENSSSCT00000000654	ENSSSCG00000000608	-	5:57723337-57725790	1329	0.0152829	0	0.0455096	0.0445436	0.0298108	0.0302541	0.139586	0.154101	0.133821	0.030773	0.0304693	0.0759557
ENSSSCT00000000656	ENSSSCG00000000610	SMCO3	5:57746301-57746979	678	0	0	0.0347975	0.17103	0	0	0.071345	0	0	0	0	0
ENSSSCT00000000657	ENSSSCG00000000611	WBP11	5:57749942-57767151	3173	2.41967	2.24956	4.37393	8.04274	7.47988	6.45081	4.16802	2.49869	3.12026	0.97416	1.82119	1.32404
ENSSSCT00000000658	ENSSSCG00000000612	ATF7IP	5:58022732-58133487	8109	4.55698e-16	1.03369e-07	3.01865e-15	0.000113266	4.36099e-05	0.000377909	0.0708551	9.83e-05	0.000157205	6.71753e-05	0.00122041	6.65046e-06
ENSSSCT00000000659	ENSSSCG00000026724	PLBD1	5:57780928-57903380	4614	0.0218474	0.0221061	0.0142725	0.0456823	0.176314	0.233762	0.109762	0.0724176	0.0836763	1.95132e-06	0.0250542	0.0125665
ENSSSCT00000000660	ENSSSCG00000000614	GRIN2B	5:58480190-58926978	5028	0.0146818	0.00370194	0.0142273	1.8445e-06	0	1.01389e-07	0.0508426	0.0361696	6.83061e-06	0.00739857	0.00398292	3.65426e-06
ENSSSCT00000000665	ENSSSCG00000000619	FAM234B	5:59414089-59454022	2182	0.0575991	0.114633	0.422752	0.178042	0.269928	0.176019	0.32228	0.127684	0.22663	0.0158882	0.0844638	1.46961e-05
ENSSSCT00000000669	ENSSSCG00000000623	BCL2L14	5:60333081-60357900	3151	0.0358451	0.0241075	0.0823601	0.0632092	0.0518089	0.186676	0.108125	0.0777269	0.0976919	0.0301019	0.0118745	0.0654971
ENSSSCT00000000671	ENSSSCG00000000625	LRP6	5:60168450-60314284	4675	1.1645	0.532369	2.36925	1.8967	2.08328	2.5303	1.22364	1.95676	2.63191	0.923362	0.632367	0.608166
ENSSSCT00000000674	ENSSSCG00000000629	-	5:61092027-61098091	1827	0.00893059	0	0.00529864	0	0	0	0	0	0	0	0	0
ENSSSCT00000000675	ENSSSCG00000000629	-	5:61092044-61096522	1471	1.55887e-06	0	0	0	0	0	0	0	0	0	0	0
ENSSSCT00000000676	ENSSSCG00000040242	TP23	5:61076298-61081148	1536	0.00641959	0	0.0064045	0	0	0	0	0	0	0	0	0
ENSSSCT00000000678	ENSSSCG00000000631	TAS2R9	5:61253927-61254863	936	0.0230195	0	0	0	0	0	0	0	0.0452224	0	0	0
ENSSSCT00000000680	ENSSSCG00000000633	YBX3	5:61337862-61361279	1744	136.819	126.943	244.841	353.004	352.879	292.178	418.389	328.019	368.062	117.163	141.2	127.288
ENSSSCT00000000681	ENSSSCG00000000634	STYK1	5:61402730-61417472	1236	0	0	0	0.0161538	0.0324426	0	0	0	0	0	0	0
ENSSSCT00000000682	ENSSSCG00000000635	-	5:61425828-61433947	896	0.2427	0.244679	1.16536	3.14299	2.25148	2.77515	2.58471	1.55301	1.36096	0.366184	0.436763	0.433117
ENSSSCT00000000683	ENSSSCG00000000636	-	5:61441124-61457839	787	0	0	0.0572028	0.308846	0.169628	0.17252	0.087887	0.0580671	0.0281729	0	0.0570401	0.112835
ENSSSCT00000000686	ENSSSCG00000036743	-	5:61533767-61541874	1309	0	0	0	0	0	2.3422e-05	0	0	0	0	0	0
ENSSSCT00000000687	ENSSSCG00000000638	-	5:61556449-61568088	2743	0	0	0	0	0	0.0067642	0	0	0	0	0	0
ENSSSCT00000000688	ENSSSCG00000000639	-	5:61583839-61596989	1054	0	0	0.0199151	0	0.0392132	0.0199067	0.122239	0.0202182	0	0	0	0
ENSSSCT00000000689	ENSSSCG00000000640	-	5:61624595-61629234	1257	0	0	0	0.302953	0.0398158	0.182282	0.0827187	0.0328691	0.115412	0	0.0324791	0.113283
ENSSSCT00000000691	ENSSSCG00000040465	KLRK1	5:61623449-61655304	3642	0	0	7.41495e-06	0.0832127	0.0376492	0.0924019	0.117615	0.0392515	0.241154	0.0166202	0.0203948	0.183466
ENSSSCT00000000693	ENSSSCG00000000642	-	5:61646504-61671636	426	0	0	0	0	0	0	0	0.211612	0	0	0.0680169	0
ENSSSCT00000000696	ENSSSCG00000000645	GABARAPL1	5:61758136-61767601	1928	3.22381	4.89293	5.01336	18.7951	10.074	6.85996	3.22419	0.811819	1.94424	0.71259	1.01577	1.15694
ENSSSCT00000000698	ENSSSCG00000000647	OLR1	5:61799355-61809691	1556	0	0	0.0507065	0.0868052	0.0373254	0.164084	0.0647802	0.0128791	0.0372414	0.0902187	0.0254952	0.101845
ENSSSCT00000000699	ENSSSCG00000000648	CLEC7A	5:61833014-61844789	653	0	0	0	0	0	0.0369911	0	0.097988	0	0	4.13553e-05	0
ENSSSCT00000000700	ENSSSCG00000000648	CLEC7A	5:61833026-61844773	606	0	0	0	0	0.0403459	0	0.0416551	0.0561338	0	0	0.0401925	0
ENSSSCT00000000701	ENSSSCG00000000648	CLEC7A	5:61832346-61844807	1458	0	0	0	0	7.13931e-22	8.42129e-08	1.33668e-21	4.89407e-07	0	0	5.72135e-35	0
ENSSSCT00000000703	ENSSSCG00000000649	CLEC1A	5:61849260-61870248	986	0.237893	0.174441	1.46775	2.03099	2.5948	3.47875	2.71673	1.35897	0.805841	0.239351	0.280841	0.300407
ENSSSCT00000000705	ENSSSCG00000000651	CLEC12B	5:61908730-61915199	843	0	0	0	0	0	0	0	4.24662e-07	9.15285e-07	0	0	0
ENSSSCT00000000708	ENSSSCG00000000653	CD69	5:62078133-62084976	559	0	0	0.0588337	0.0870189	0	0.0605662	6.23792e-06	0	0	0	0	0
ENSSSCT00000000709	ENSSSCG00000000653	CD69	5:62077987-62085900	1752	0	0.0226397	0.0300746	0.0766669	0.043552	0.0297239	0.0794028	0	0.0325944	0	0.0223455	0.0223374
ENSSSCT00000000711	ENSSSCG00000000655	KLRF1	5:62031829-62044336	2490	0.0383438	0.0773592	0.0831874	0.0591171	0.037028	0.0375337	0.0617902	0.0461122	0.103486	0	0	0
ENSSSCT00000000715	ENSSSCG00000000659	-	5:62276262-62325141	4281	0	0	0	0.0208165	0.0333546	0.00422413	0.00435289	0	0	0	0	0
ENSSSCT00000000716	ENSSSCG00000000660	A2M	5:62437646-62485537	7467	6.23028e-07	1.04004e-05	9.82995e-06	2.95322e-06	4.32315e-06	2.55164e-06	1.04836e-05	1.0267e-05	9.92896e-06	1.0344e-05	1.01094e-05	1.0061e-05
ENSSSCT00000000717	ENSSSCG00000000661	PHC1	5:62558597-62577503	3008	1.25249e-08	8.36987e-06	9.75338e-22	6.65701e-13	5.63654e-12	1.45201e-14	6.40341e-13	7.06303e-08	5.2329e-10	4.62481e-14	3.87157e-05	1.24056e-05
ENSSSCT00000000718	ENSSSCG00000040743	M6PR	5:62546200-62557674	2811	0.98551	1.06707	4.44034	7.94875	7.59596	6.56125	6.16659	3.76798	4.01927	1.04099	1.65007	1.39598
ENSSSCT00000000719	ENSSSCG00000000663	-	5:62506008-62523810	2172	0.00888062	0.008958	0.0394499	0.128528	0.0858935	0.113208	0.143281	0.107348	0.0685807	0.0447332	0.159014	0.176872
ENSSSCT00000000720	ENSSSCG00000000664	-	5:62603251-62647105	4363	6.04175e-119	4.05904e-221	1.8767e-126	1.78214e-146	1.96701e-30	6.63872e-68	0.00552467	0.00510084	7.45065e-98	0.00428443	0	7.32165e-21
ENSSSCT00000000721	ENSSSCG00000000665	RIMKLB	5:62686466-62723919	1579	0.146068	0.0379261	0.21743	0.000217781	0.065961	0.0950602	0.102996	0.0112812	8.54559e-13	0.0542809	0.0879501	0.104987
ENSSSCT00000000722	ENSSSCG00000031712	MFAP5	5:62742569-62757491	907	7.31891	7.24188	29.9443	35.1735	49.0703	37.5053	17.5348	6.53826	4.94489	1.51965	2.57926	2.79598
ENSSSCT00000000723	ENSSSCG00000000667	AICDA	5:62777229-62787483	2364	0	0	0	0	6.73702e-08	0.031763	0.014535	0	0	0	0	0
ENSSSCT00000000728	ENSSSCG00000000672	CLSTN3	5:63572074-63599505	3372	0.614025	0.347997	1.01225	5.1069e-06	0.114685	0.421249	0.316245	0.138376	8.59223e-14	1.74336e-06	0.148405	0.215982
ENSSSCT00000000732	ENSSSCG00000033913	C1RL	5:63591516-63639218	1767	0.0704669	0.0672854	0.110702	0.072831	0.11238	0.0677111	0.0416361	0.0111732	0.0396744	0.0223967	0.0187029	0.0304382
ENSSSCT00000000733	ENSSSCG00000000675	C1R	5:63646324-63655144	2094	4.05435	4.37061	9.38782	24.0379	37.7963	11.9168	15.4209	4.73595	10.8615	3.68239	2.47408	7.47608
ENSSSCT00000000740	ENSSSCG00000000679	LRRC23	5:63809131-63817218	1614	0.0132647	3.69575e-58	0.0486473	0.0201771	3.77223e-11	2.73935e-70	0.0248655	0.0247114	0.0357037	0.0247495	0.0122372	0.0267326
ENSSSCT00000000741	ENSSSCG00000000680	GPR162	5:63885714-63891266	2515	0.0605421	0.006898	2.88385e-09	0.0502711	0.0139306	0.0587074	0.00664409	0	0.0217962	0	0.0300239	0
ENSSSCT00000000742	ENSSSCG00000000681	P3H3	5:63871507-63884835	2549	1.12191	1.0412	3.42917	4.30901	3.53827	2.10798	2.63607	1.28155	1.65776	0.444628	0.855234	1.03572
ENSSSCT00000000743	ENSSSCG00000000682	GNB3	5:63863655-63870433	1691	0.116701	0.0353117	0.184766	0.101644	0.0906264	0.114902	0.141607	0.0938642	0.169557	0.0117535	0.0348586	0.0348363
ENSSSCT00000000744	ENSSSCG00000000683	CDCA3	5:63859540-63861900	1126	0.0924671	2.18746e-156	0.0457389	0.84739	0.670167	2.05984	1.1552	0.280437	0.180638	0.0930636	0.208868	0.312212
ENSSSCT00000000745	ENSSSCG00000000684	USP5	5:63843032-63859572	4722	2.4403	1.25274	7.04621	3.03378	2.65008	3.34064	5.07036	4.13681	5.09262	0.892278	2.11238	1.99221
ENSSSCT00000000746	ENSSSCG00000000685	TPI1	5:63832434-63842925	1347	0.00148087	0.00141774	0.000593753	0.00144174	0.00194575	0.00211664	0.00112554	0.00142952	0.000801529	0.00300667	0.00270641	0.00323032
ENSSSCT00000000748	ENSSSCG00000000687	CD4	5:63892133-63918466	2704	4.17705e-51	3.90271e-61	8.99128e-12	0.0600595	0.0868958	0.061646	0.180135	7.18572e-05	6.2988e-43	0.0905639	8.82054e-57	0.00247632
ENSSSCT00000000749	ENSSSCG00000000687	CD4	5:63892131-63918435	2881	4.37276e-141	2.86004e-66	0.0306258	9.73565e-24	7.63333e-16	5.14466e-32	1.66429e-12	0.000386027	1.20128e-30	7.68669e-08	0.0587483	2.82649e-09
ENSSSCT00000000750	ENSSSCG00000000688	LAG3	5:63929623-63935410	1925	0.0101232	0	0.0300117	0	0.0294209	0	0.0511033	0.0406605	0	0.0101971	0.0402969	0.0302321
ENSSSCT00000000752	ENSSSCG00000000690	MLF2	5:63951663-63957143	1806	2.64802	2.33794	5.56334	6.50509	6.66061	7.09348	9.37367	5.65711	5.79469	1.86784	3.7379	3.44031
ENSSSCT00000000753	ENSSSCG00000000691	COPS7A	5:63970547-63977201	1824	2.3867	1.52317	6.58077	3.27071	2.9867	3.86326	8.06539	6.51131	5.76996	1.60515	2.77036	2.63048
ENSSSCT00000000754	ENSSSCG00000000692	PIANP	5:63992908-63999429	2490	0.0153288	0	0.0226777	0.0073803	0.0222077	0	0.00771514	0	0	0	0.00761653	0
ENSSSCT00000000755	ENSSSCG00000000693	NCAPD2	5:64136506-64167410	5243	0.4746	0.255375	1.19528	1.33891	1.47902	2.54157	1.26946	1.03589	0.775456	0.279946	0.677261	0.582052
ENSSSCT00000000756	ENSSSCG00000000694	GAPDH	5:64129678-64133990	1320	615.628	438.552	1873.65	2393.31	3348.12	3335.84	10929.2	6272.92	10754.8	1822.98	2421.2	2856.03
ENSSSCT00000000757	ENSSSCG00000000695	IFFO1	5:64116151-64129264	2768	0.349422	0.248818	0.904734	0.659276	0.971568	0.803847	0.751553	0.425429	0.983017	0.179498	0.224764	0.333617
ENSSSCT00000000758	ENSSSCG00000000696	NOP2	5:64106097-64115582	2692	1.76788	0.821565	3.71643	5.22577	4.18145	3.55017	3.38654	3.29793	6.00187	0.95996	1.65009	1.30608
ENSSSCT00000000759	ENSSSCG00000000697	CHD4	5:64065991-64105173	6500	2.32219	1.4078	5.42423	4.84273	5.62696	5.33236	4.0589	2.59705	4.48727	1.08677	1.44083	1.59709
ENSSSCT00000000761	ENSSSCG00000000699	LPAR5	5:64049490-64060246	2366	0.00809976	0.0490234	0.0399523	0.0156171	0.0156524	0.0079336	0.0163227	0	0.0390568	0	0	0.0242035
ENSSSCT00000000762	ENSSSCG00000000700	ACRBP	5:64027875-64047847	4108	0.488824	0.538824	1.63369	2.14947	2.10909	2.16773	1.8087	1.07232	1.47332	0.223529	0.413638	0.469348
ENSSSCT00000000764	ENSSSCG00000000702	ZNF384	5:64012802-64024560	1614	0.946172	0.644462	1.75186	1.33276	1.19377	0.980867	1.33033	0.803424	1.28642	0.321751	0.636334	0.623461
ENSSSCT00000000765	ENSSSCG00000000703	VAMP1	5:64184355-64185800	357	0.000301843	0.00135289	0	0.00130416	0.00138214	0.000281368	0.197916	5.10578e-07	0.00095703	0	0.092397	0
ENSSSCT00000000766	ENSSSCG00000000704	TAPBPL	5:64188186-64197130	3128	0.56188	0.385065	1.0754	0.52263	0.656773	0.896944	0.842066	0.752353	1.08171	0.167958	0.633008	0.814289
ENSSSCT00000000767	ENSSSCG00000000705	CD27	5:64197212-64202615	1510	1.01133e-22	0	5.55228e-18	4.81733e-10	3.81198e-13	1.17404e-07	0.0420921	0	4.05107e-33	0	2.08825e-15	0.039488
ENSSSCT00000000768	ENSSSCG00000000706	LTBR	5:64271371-64278431	2060	2.19197	1.23792	4.07789	5.05617	5.86707	4.4667	4.94642	2.75391	4.06318	0.735093	1.25494	1.37803
ENSSSCT00000000769	ENSSSCG00000000707	SCNN1A	5:64287522-64313609	3042	0.0100875	0.0625436	6.81537e-06	1.80742e-05	0.0494437	5.14175e-06	7.20946e-08	0.0186149	0.0119272	0.00624386	0.0184828	0.0247123
ENSSSCT00000000771	ENSSSCG00000000708	TNFRSF1A	5:64319043-64331909	2235	1.18432	0.662965	3.13268	3.78695	3.26182	3.02171	3.69223	1.52001	2.12436	0.486954	1.22841	1.20471
ENSSSCT00000000772	ENSSSCG00000000709	PLEKHG6	5:64331079-64349498	4053	0.523268	0.356569	1.25054	1.1991	1.07725	1.15407	1.11537	0.399215	0.603867	0.198926	0.469644	0.389011
ENSSSCT00000000773	ENSSSCG00000022230	CD9	5:64420582-64459763	699	1.42853e-06	1.67534e-06	3.57778e-06	1.60969e-06	3.52749e-06	3.01058e-06	2.3515e-06	5.19313e-06	3.65729e-06	1.88795e-06	3.50009e-06	3.6259e-06
ENSSSCT00000000775	ENSSSCG00000000712	VWF	5:64519187-64678840	8932	4.11974e-06	6.11228e-06	0.100593	1.54411e-06	0.0223781	1.82129e-06	2.13247e-06	0.0265495	0.0538444	1.69705e-06	0.0999582	3.03401e-06
ENSSSCT00000000776	ENSSSCG00000000713	-	5:64986831-65001820	786	0.0855974	0.0287608	0.0286482	0.0562463	0	0.0288012	0.293438	0.029081	0	0	0.057132	0
ENSSSCT00000000779	ENSSSCG00000000716	KCNA1	5:65562169-65563657	1488	0	0	0.0266661	0	0	0.0265615	0	0.0135455	0	0	0	0
ENSSSCT00000000780	ENSSSCG00000000717	KCNA6	5:65625584-65659219	5144	0.157757	0.126606	0.200834	0.144473	0.117101	0.0651275	0.202606	0.0734191	0.0630447	0.0307189	0.0356046	0.0625784
ENSSSCT00000000781	ENSSSCG00000000718	GALNT8	5:65697868-65735588	2153	0	0	1.03617e-05	0	0	0	0	0	0	0	0	0
ENSSSCT00000000782	ENSSSCG00000000719	-	5:65760200-65789223	1741	8.68172	5.93279	25.6715	21.1579	28.9263	28.5546	16.7067	10.8221	17.088	2.57385	5.4034	3.97198
ENSSSCT00000000783	ENSSSCG00000000720	AKAP3	5:65794730-65840172	2617	3.71612e-07	1.16414e-06	8.79879e-06	5.99059e-06	1.82642e-08	3.97208e-16	4.17106e-09	3.14922e-08	1.05427e-05	0.0354395	1.08809e-05	1.13902e-05
ENSSSCT00000000784	ENSSSCG00000000721	DYRK4	5:65816416-65839668	1572	0	3.0797e-78	0	0.0122583	1.26745e-15	1.27849e-05	4.1228e-54	0	0.012271	0	0.0126026	0.0181155
ENSSSCT00000000785	ENSSSCG00000000722	RAD51AP1	5:65837562-65897144	1804	0.0013168	0.0689565	0.0876814	0.2076	0.137202	0.1919	0.244245	0.0576152	0.0307288	0.00770571	0.11174	0.0619345
ENSSSCT00000000786	ENSSSCG00000000723	C12orf4	5:65892909-65939562	2712	0.288396	0.207597	1.13518	1.05368	1.07353	1.40521	1.79161	0.964523	1.05457	0.271058	0.319959	0.0512418
ENSSSCT00000000791	ENSSSCG00000000728	PARP11	5:66443547-66482346	2445	8.55159e-06	8.07075e-06	0.0343924	1.40924e-05	3.0737e-06	5.45203e-07	0.0566903	1.44246e-06	0.000186326	0.123058	1.29227e-06	0.000212914
ENSSSCT00000000793	ENSSSCG00000000730	PRMT8	5:66665262-66753868	4388	0.0401907	0.0350502	0.0658664	0.00549914	0.0431057	0.0541951	1.11764e-08	0.00422241	0.016227	9.42024e-09	1.71976e-08	0.00421448
ENSSSCT00000000795	ENSSSCG00000000732	CRACR2A	5:66530500-66644967	2619	0.0299391	0.0146604	0.0402991	0.0298152	0.0227171	5.51223e-06	0.0101972	0.0327546	0.0456648	8.31504e-08	0.0645052	0.0671668
ENSSSCT00000000797	ENSSSCG00000000734	-	5:66853403-66911569	2798	0.654673	0.299027	0.917775	1.01611	0.425709	0.762184	0.140748	5.06479e-05	0.248787	0.11704	2.38422e-05	0.000167572
ENSSSCT00000000798	ENSSSCG00000000735	TSPAN9	5:66913754-67106257	4105	3.90122	1.09704	5.43756	3.42315	3.97256	5.45569	4.72712	1.73825	0.81299	0.640029	2.4894	1.45629
ENSSSCT00000000799	ENSSSCG00000000736	TEAD4	5:67124725-67193970	5545	0.720187	0.540663	1.4791	0.25393	0.25318	0.55725	0.65373	0.872042	1.90599	0.458837	0.539431	0.941846
ENSSSCT00000000800	ENSSSCG00000000736	TEAD4	5:67130356-67194381	1701	0.760342	0.382188	1.65077	1.2035	1.57674	1.74563	2.31315	1.1946	0.826964	0.705953	1.35437	0.831901
ENSSSCT00000000801	ENSSSCG00000000737	TULP3	5:67201690-67238276	1736	7.98516e-05	4.01282e-06	0.0826937	0.348332	0.105085	1.4731e-05	0.000214668	3.10985e-05	0.0612961	0.0619951	3.82508e-06	2.13251e-05
ENSSSCT00000000802	ENSSSCG00000000738	RHNO1	5:67239908-67246660	1747	0.292717	0.130278	0.311801	1.24542	0.672617	1.94016	0.433232	0.165613	0.138117	0.0412184	0.24262	0.0746615
ENSSSCT00000000803	ENSSSCG00000000739	FOXM1	5:67241909-67265377	5828	0.00643586	0.00954258	0.0212236	0.0544376	0.0684425	0.115971	0.0804767	0.0124297	2.10339e-14	0.0127121	0.0749529	0.0270138
ENSSSCT00000000804	ENSSSCG00000000740	TEX52	5:67263788-67269948	927	0	0	0	0	0	0	0	0	0	0	0	0.0230965
ENSSSCT00000000805	ENSSSCG00000000741	NRIP2	5:67280923-67292348	3478	0.0269273	0.0108661	0.153714	0.0207071	0.0362973	0.105086	0.173179	0.0323236	0.103532	0.00542743	0.0267558	0.0483159
ENSSSCT00000000806	ENSSSCG00000000742	ITFG2	5:67290111-67305758	5367	0.346655	0.283901	0.828363	0.94941	0.856958	0.772407	0.725201	0.466193	0.707525	0.10363	0.228321	0.15744
ENSSSCT00000000807	ENSSSCG00000000743	FKBP4	5:67314010-67321630	1549	30.3692	23.2737	111.536	34.4258	35.2156	41.7264	31.162	26.0317	30.5445	5.79009	13.0683	11.2976
ENSSSCT00000000808	ENSSSCG00000000744	-	5:67323737-67324292	537	0	0.143123	0.0966891	0	0	0	0	0.0980393	0.0479644	0.0475271	0.0477108	0.0932916
ENSSSCT00000000809	ENSSSCG00000000745	DDX11	5:67363830-67395733	3740	0.236	0.112171	0.315512	0.0452506	0.0198205	0.169317	0.215849	0.112748	0.254722	0.125982	0.18451	0.126036
ENSSSCT00000000810	ENSSSCG00000000746	WASHC1	5:67395875-67409452	1409	1.44473	1.03229	4.97641	5.28638	5.33202	4.30127	4.3382	2.46444	2.64643	0.590509	1.12579	1.2906
ENSSSCT00000000812	ENSSSCG00000000748	IQSEC3	5:67445841-67541312	7235	0.217217	0.0611609	0.116554	0.0024205	0.0121149	0.00245412	0	0.00252085	0	0	0.00250736	0.0100795
ENSSSCT00000000813	ENSSSCG00000000749	SLC6A12	5:67550287-67572854	3019	0.519991	0.0221755	0.339426	0.107721	9.13242e-05	0.166739	7.18617e-05	0.0102853	6.82049e-05	7.14247e-05	6.96688e-05	4.85708e-07
ENSSSCT00000000815	ENSSSCG00000000751	CCDC77	5:67725832-67756868	2952	0.0511995	0.0581065	0.233263	0.480372	0.444253	0.525271	0.341201	0.243477	0.215576	0.0386949	0.133587	0.102045
ENSSSCT00000000817	ENSSSCG00000000753	WNK1	5:68088540-68139930	5907	0.701604	0.913524	2.00271	1.26816	0.699397	0.841255	1.13906	1.64431	2.01229	0.746286	1.44798	1.25184
ENSSSCT00000000818	ENSSSCG00000000754	RAD52	5:68144207-68167642	1789	0.0321882	0.0341226	0.220512	0.256238	0.343803	0.120251	0.106842	0.0528102	0.0613355	0.0148125	0.0252254	0.0136309
ENSSSCT00000000819	ENSSSCG00000000755	ERC1	5:68252032-68691230	2970	0.664727	0.4998	1.22329	2.76765	1.7714	1.76645	1.12704	1.51217	2.25289	0.459018	0.511653	0.470176
ENSSSCT00000000821	ENSSSCG00000000757	ADIPOR2	5:68760095-68807226	3650	1.6845	1.39181	2.69522	4.80389	5.62806	4.68394	1.45121	1.49288	1.40764	0.650821	0.325747	0.81361
ENSSSCT00000000823	ENSSSCG00000000759	-	5:68627348-68731931	2006	1.26999e-05	0.0580771	0.0883744	0.0534046	0.436874	0.273416	0.396364	0.175017	0.239421	0.158191	0.0295031	0.248211
ENSSSCT00000000824	ENSSSCG00000000760	LRTM2	5:68822322-68836580	3661	0.0255199	0.0102983	0.0401779	0.00490472	0	0	0.00512757	0	0	0	0	0.0101765
ENSSSCT00000000827	ENSSSCG00000027725	CACNA1C	5:69271052-69448130	6141	2.36962e-06	5.6787e-06	1.82386e-06	0.0729255	3.09053e-06	1.79313e-06	6.39411e-06	0.0530492	0.0188531	1.54436e-06	0.0314561	0.0217585
ENSSSCT00000000828	ENSSSCG00000000764	HDHD5	5:69500284-69512611	1242	1.04847	0.466218	2.37076	1.34927	1.46778	1.35073	1.14921	0.71661	1.19055	0.0831061	0.214056	0.295316
ENSSSCT00000000830	ENSSSCG00000000766	CECR2	5:69621878-69741434	4311	0.687439	0.578893	1.22107	0.528256	1.02349	0.752739	0.633857	0.454653	0.405112	0.194686	0.347634	0.304279
ENSSSCT00000000831	ENSSSCG00000000767	ATP6V1E1	5:69748351-69772077	850	4.6508	4.1953	16.0582	17.8968	23.4808	21.1055	18.6034	13.0163	11.4897	3.00104	4.36067	3.81786
ENSSSCT00000000833	ENSSSCG00000000769	BID	5:69849014-69875853	1552	0.132406	0.1878	0.410939	1.15478	1.40181	1.58989	1.21698	0.405866	0.575406	0.293086	0.155871	0.193307
ENSSSCT00000000834	ENSSSCG00000000770	MICAL3	5:69890144-69985424	5851	0.852819	0.251843	1.70331	1.03914	1.00433	0.543917	0.358676	0.403358	0.754263	0.523816	0.445574	0.282188
ENSSSCT00000000835	ENSSSCG00000027190	PEX26	5:70133023-70142503	3883	1.09096	0.582863	2.02258	2.39335	2.84715	2.7552	2.95051	2.51316	3.62066	0.51483	1.30425	1.05755
ENSSSCT00000000837	ENSSSCG00000000190	TUBA1B	5:15150239-15153613	1573	2.85935	3.61473	14.0936	9.24772	7.55028	13.0339	15.1094	5.42381	5.90684	3.11159	4.65711	4.80342
ENSSSCT00000000838	ENSSSCG00000000774	USP18	5:70205754-70226241	1142	4.48803e-10	0	0.126611	0.385511	0.834326	8.97365e-11	0.192483	0.000315795	0.414211	0.00053786	0.0397254	0.405288
ENSSSCT00000000843	ENSSSCG00000000779	KIF21A	5:70890674-70964319	4947	0.148889	0.072052	0.34354	0.142992	0.472822	0.424104	0.54467	0.264243	0.354129	0.163283	0.0397177	0.0699163
ENSSSCT00000000845	ENSSSCG00000000781	ABCD2	5:71121074-71181317	6740	0.00814734	0.00548011	0.0213348	0.0182218	0.0234529	0.0422311	0.155149	0.0623506	0.00780603	0.0136884	0.0350498	0.00541857
ENSSSCT00000000846	ENSSSCG00000000782	-	5:71207275-71238310	1056	0	0	0	0	0.0195643	0	0	0	0	0	0	0
ENSSSCT00000000848	ENSSSCG00000000783	SLC2A13	5:71295007-71673893	7203	0.106565	0.156157	0.29894	0.474148	0.516012	0.411706	0.414433	0.22791	0.269779	0.0460398	0.0604502	0.116441
ENSSSCT00000000849	ENSSSCG00000000784	LRRK2	5:71800336-71944105	7580	0.686379	0.607475	2.00732	2.42536	2.87823	3.11637	2.85464	2.46832	2.62721	0.570545	0.877383	0.533422
ENSSSCT00000000855	ENSSSCG00000000789	CNTN1	5:72168560-72493742	3767	0.00105067	0.00112116	0.00101034	5.87443e-06	0.000172753	0.00087282	0.00102318	3.45712e-05	0.0010052	0	0	3.04406e-05
ENSSSCT00000000857	ENSSSCG00000000791	PDZRN4	5:72787913-72940818	5487	0.134182	0.175991	0.2406	0.312103	0.190065	0.248007	0.0571918	0.0435528	0.0675464	0.027051	0.0166548	0.0200754
ENSSSCT00000000859	ENSSSCG00000000793	PPHLN1	5:73556214-73696397	3369	0.438852	0.465151	1.07389	2.73287	3.44468	2.70989	1.84484	1.87565	1.94415	0.358648	0.366935	0.286086
ENSSSCT00000000861	ENSSSCG00000000795	ADAMTS20	5:74503530-74672835	5973	0.212545	0.305953	1.787	0.441716	0.631009	0.508976	0.198748	0.586392	0.566115	0.144383	0.170598	0.0928662
ENSSSCT00000000862	ENSSSCG00000000795	ADAMTS20	5:74503115-74672703	6496	2.61623	1.79648	13.7893	3.65735	4.66404	7.97548	1.86971	2.27194	5.90024	0.565803	1.09235	1.34291
ENSSSCT00000000865	ENSSSCG00000000798	TWF1	5:74868590-74881218	3142	0.113367	0.229347	0.391163	3.15329	2.32249	2.29664	1.72078	0.841339	1.00244	0.084538	0.190067	0.23551
ENSSSCT00000000866	ENSSSCG00000000799	IRAK4	5:74842183-74858125	1382	0.190063	0.103212	0.435115	1.47616	1.72386	0.954169	0.904462	0.530426	0.48323	0.132483	0.262276	0.261634
ENSSSCT00000000867	ENSSSCG00000000800	PUS7L	5:74803483-74834421	4843	0.0174647	0.017707	0.0282062	0.163684	0.0572327	0.19624	0.105244	0.176467	0.203376	0.00863419	0.00862865	0.00865205
ENSSSCT00000000868	ENSSSCG00000000801	TMEM117	5:74926272-75402497	1718	0.00231071	0.146969	0.218987	0.690577	0.805727	0.784788	1.37718	0.593695	1.10793	0.168985	0.244634	0.161439
ENSSSCT00000000870	ENSSSCG00000000802	NELL2	5:75505716-75836327	2747	0.0954225	0.0220208	0.288268	0.158384	0.13046	0.037584	0.0122222	1.01255e-05	0.00421048	0	0.00686575	0.000254207
ENSSSCT00000000873	ENSSSCG00000000804	ANO6	5:76238922-76334021	2601	3.67447	2.3187	6.05064	8.33546	9.4507	7.40953	6.30534	5.7588	4.98113	1.06063	1.35064	2.02289
ENSSSCT00000000875	ENSSSCG00000000806	SCAF11	5:76808986-76876612	6999	0.0347901	0.0262044	0.103636	0.905247	0.654366	0.797765	0.77859	0.248002	0.246747	0.0079219	0.0252043	0.0655407
ENSSSCT00000000876	ENSSSCG00000000807	SLC38A1	5:77011949-77058427	1416	0.39331	2.24956e-05	1.29515	0.357862	0.289684	0.492	0.929993	0.321876	5.45526e-06	0.128892	0.00646799	0.00665081
ENSSSCT00000000877	ENSSSCG00000000808	SLC38A2	5:77113493-77127714	4867	19.0922	17.2898	39.7711	32.9644	36.4878	37.6882	31.1008	16.3765	8.5311	2.90746	6.32941	4.60304
ENSSSCT00000000878	ENSSSCG00000000808	SLC38A2	5:77113494-77127650	5861	2.90859	3.6348	7.46842	12.1327	12.0425	10.0968	4.85381	3.97567	2.95253	0.910579	0.881427	1.04812
ENSSSCT00000000879	ENSSSCG00000000810	AMIGO2	5:77642194-77645753	3214	0.0760624	0.123954	0.455112	0.720259	0.975185	1.26241	1.68823	0.673335	0.776554	0.0530664	0.26747	0.291583
ENSSSCT00000000880	ENSSSCG00000000811	PCED1B	5:77781713-77795179	2252	8.92082e-30	4.6792e-16	0.0405226	0.0190744	0.0162729	0.0225527	0.0703402	0.0208517	0.0675088	1.62982e-11	3.38707e-07	0.0718857
ENSSSCT00000000881	ENSSSCG00000000812	-	5:77759889-77760551	576	0	0	0	0	0	0.0442803	0	0.0885354	0	0	0	0
ENSSSCT00000000883	ENSSSCG00000028397	-	5:78319208-78324904	1488	0.162747	0.189201	0.678733	2.1373	2.90506	3.18576	0.99761	0.730769	0.0787007	0.223896	0.632475	0.72245
ENSSSCT00000000884	ENSSSCG00000028397	-	5:78319045-78324862	1401	0.184509	0.629728	1.4334	1.82505	1.61992	0.585226	0.440765	0.92208	1.01054	0.590568	0.81066	0.000367313
ENSSSCT00000000889	ENSSSCG00000000816	SENP1	5:78423136-78476313	3807	0.24562	0.271827	0.880734	0.826212	0.975549	0.815991	0.470758	0.407666	0.672891	0.0905346	0.151709	0.172411
ENSSSCT00000000891	ENSSSCG00000034703	-	5:78742329-78743286	957	0.179306	0.0903901	0.291003	0.0877776	0.176522	0.112096	0.0458174	0.0681919	0.0879963	0.0676465	0	0
ENSSSCT00000000910	ENSSSCG00000000837	CHST11	5:79792792-79994685	1118	0.053768	0.0572217	0.0811185	0.0424591	3.95493e-07	0.0372176	0.167861	0.00820873	0.0294839	1.52739e-06	0.0277303	0.000930639
ENSSSCT00000000911	ENSSSCG00000000838	SLC41A2	5:79620577-79718079	1721	0.235573	0.166139	0.444748	0.588701	0.820852	0.506009	0.420576	0.176107	0.133767	0.161336	0.177513	0.126087
ENSSSCT00000000912	ENSSSCG00000000839	ALDH1L2	5:79491977-79548208	3354	0.106553	7.32956e-07	0.156948	1.17764e-06	0.0557105	0.0297783	0.0367534	1.36822e-06	1.34629e-06	0.0571464	2.25284e-06	1.83215e-06
ENSSSCT00000000913	ENSSSCG00000000839	ALDH1L2	5:79492686-79554896	3308	1.71397	0.818872	4.64091	3.313	3.26763	2.79535	4.51587	2.68071	7.91961	0.828669	1.79936	1.63511
ENSSSCT00000000914	ENSSSCG00000000840	WASHC4	5:79417711-79474612	5247	0.506103	0.376251	1.64534	4.22298	4.03052	2.90698	1.86091	1.96778	2.62735	0.24419	0.253823	0.594498
ENSSSCT00000000915	ENSSSCG00000000841	APPL2	5:79356066-79412235	3181	0.859632	0.990388	2.06521	7.94696	8.172	6.02246	3.51458	2.19382	2.71359	0.298028	0.593681	0.71291
ENSSSCT00000000916	ENSSSCG00000000842	KANSL2	5:79281585-79305246	2175	0.650958	0.747478	2.84668	1.97166	2.37983	1.86688	2.75653	2.10132	2.74147	0.610483	1.22153	1.09233
ENSSSCT00000000917	ENSSSCG00000000843	TXNRD1	5:80170333-80236277	3798	2.94708	2.12087	10.1624	9.28241	10.3035	10.1285	6.28042	4.23378	6.36536	0.896006	2.71802	1.45929
ENSSSCT00000000919	ENSSSCG00000000844	NFYB	5:80333756-80353708	2682	0.338799	0.458147	2.15707	1.58599	2.29627	2.29644	1.67219	1.07959	1.23931	0.26341	0.313788	0.443171
ENSSSCT00000000923	ENSSSCG00000000846	HCFC2	5:80368243-80409786	9101	0.489592	0.477915	1.03706	1.91076	2.35061	2.0197	1.34823	1.55776	1.68402	0.336489	0.308554	0.41391
ENSSSCT00000000924	ENSSSCG00000000847	TDG	5:80437958-80492252	2993	0.397362	0.623562	1.78304	2.72493	1.73893	2.00878	2.3346	1.35753	1.32922	0.273303	0.382411	0.377143
ENSSSCT00000000925	ENSSSCG00000000848	GLT8D2	5:80421625-80473108	1634	0.303971	0.522263	0.871885	3.72719	3.08105	3.48461	2.72628	1.21135	0.629963	0.385849	0.293604	0.44472
ENSSSCT00000000926	ENSSSCG00000000849	-	5:80512207-80520068	1690	7.56715	9.55807	36.7349	22.902	21.9858	20.9203	28.346	14.9871	15.6322	2.8462	5.34848	5.38572
ENSSSCT00000000929	ENSSSCG00000000854	STAB2	5:80694225-80858598	8308	3.00742e-06	0	0.0193737	0.0229475	0.0336481	0.0361951	0.0230681	0.015314	0.00209997	0	2.82171e-06	0.0131274
ENSSSCT00000000930	ENSSSCG00000000853	NT5DC3	5:80646279-80688504	1458	4.19812	1.92956	6.82112	3.71147	2.66743	4.74477	3.61235	4.5883	7.73931	0.776128	1.17939	1.66988
ENSSSCT00000000931	ENSSSCG00000000854	STAB2	5:80694689-80858431	7647	0.00477032	0	7.33456e-07	0.000178191	1.05683e-07	0.0139266	3.4789e-07	4.64625e-06	0	0	0.00473549	2.40217e-06
ENSSSCT00000000934	ENSSSCG00000000856	PAH	5:81391436-81453790	1191	0.00024302	0	0.000242387	0	8.36135e-07	0	0	0.000231414	0.000233429	0	0.000245063	0
ENSSSCT00000000935	ENSSSCG00000000857	IGF1	5:81776640-81832917	823	0.000459096	0.0866939	0.0184783	0.147632	1.43317e-05	3.47862e-06	0.408006	2.61335e-06	6.61019e-12	0.0244182	1.01955e-05	2.68432e-36
ENSSSCT00000000936	ENSSSCG00000000857	IGF1	5:81776421-81848048	879	0.287147	0.291954	1.74483	3.16099	2.53685	5.02057	7.91817	2.44947	2.15226	1.23875	2.70535	2.08124
ENSSSCT00000000937	ENSSSCG00000000858	PMCH	5:82018815-82020334	867	0	0	0	0.0744411	0.0249668	0	0	0	0	0.0508212	0	0
ENSSSCT00000000938	ENSSSCG00000000859	PARPBP	5:82019181-82091387	3090	4.30086e-06	0.0184563	3.92717e-06	0.328525	0.291185	0.44618	0.262472	0.154847	0.0176007	0.0429609	0.0666707	3.95506e-06
ENSSSCT00000000939	ENSSSCG00000000860	NUP37	5:82091455-82145089	2807	0.108007	0.183864	0.633333	0.786954	0.742643	0.932858	0.815126	0.527288	0.766933	0.176853	0.167759	0.215246
ENSSSCT00000000941	ENSSSCG00000000862	GNPTAB	5:82361905-82460801	5317	0.309855	0.368598	1.15823	1.68566	1.82369	1.81833	1.37787	1.13757	1.54724	0.294249	0.591159	0.630321
ENSSSCT00000000943	ENSSSCG00000000864	CHPT1	5:82500692-82544732	1949	1.53396	1.13066	3.54782	4.63295	6.14305	3.97578	7.70465	3.84475	5.81838	0.914066	1.28425	1.80548
ENSSSCT00000000945	ENSSSCG00000000866	MYBPC1	5:82557988-82651044	3995	122.511	110.766	295.719	649.776	490.072	612.332	140.395	133.212	106.314	28.6116	31.9654	37.8226
ENSSSCT00000000947	ENSSSCG00000000867	-	5:82727405-82744754	756	0.0386175	0	0.109834	0.0586327	0.0810072	0.027211	0.123291	0.0764494	0.0186103	0	0	0.198406
ENSSSCT00000000949	ENSSSCG00000000869	UTP20	5:82813700-82913162	8692	0.619964	0.420535	2.46678	2.1186	1.68079	1.73685	1.5021	1.841	3.11611	0.394851	0.802457	0.570526
ENSSSCT00000000950	ENSSSCG00000000870	ARL1	5:82795824-82812144	3306	1.40782	1.06986	4.58593	7.52106	7.33082	6.72335	7.84081	5.08442	6.2585	1.20716	1.73505	1.6691
ENSSSCT00000000951	ENSSSCG00000000871	SLC5A8	5:82973249-83030996	6315	0.213372	0.126298	0.499838	0.240956	0.205538	0.196296	0.079444	0.163177	0.222386	0.042532	0.0644667	0.0945059
ENSSSCT00000000956	ENSSSCG00000000873	ANO4	5:83052966-83411449	4007	0	0	0	1.24753e-05	0	2.2882e-59	0	7.7636e-06	0	0	0	0
ENSSSCT00000000957	ENSSSCG00000000874	GAS2L3	5:83562167-83600308	2713	0.0143616	0.0748745	0.149412	0.214148	0.285662	0.720213	0.475551	4.05048e-05	0.112913	0.0477961	2.99682e-06	0.0437896
ENSSSCT00000000960	ENSSSCG00000000877	SCYL2	5:83813208-83878760	5673	0.0313562	0.0696795	7.68561e-05	1.95952	1.71636	1.54557	1.44324	0.714785	1.25451	0.0469039	0.120442	0.0950908
ENSSSCT00000000963	ENSSSCG00000025682	ACTR6	5:83908882-83929081	2369	0.250752	0.407974	1.33258	2.44073	3.67326	2.47188	2.90961	1.58126	1.79415	0.293384	0.370039	0.257821
ENSSSCT00000000964	ENSSSCG00000000882	ANKS1B	5:84080902-85065974	2838	0	2.03316e-12	1.34729e-05	5.16813e-17	0.0643508	0.000159097	0.0390964	7.64545e-23	0.0261106	2.3676e-05	0	2.40857e-05
ENSSSCT00000000965	ENSSSCG00000000882	ANKS1B	5:84080421-84882383	3278	0	1.03968e-06	0.0337962	0.0593622	3.08419e-12	0.059921	0.0478406	0.0171465	9.44607e-07	2.38458e-13	0	1.95098e-12
ENSSSCT00000000966	ENSSSCG00000000882	ANKS1B	5:84245512-84848517	2700	0	0.0425779	2.57167e-20	0.103099	1.50409e-22	0.0293126	0.0202683	1.15803e-18	0.0876417	0.0141519	0	0.00698384
ENSSSCT00000000967	ENSSSCG00000000883	-	5:84715296-84721530	1335	0	0	0	0	0	0.0151065	0	0	0	0	0	0
ENSSSCT00000000968	ENSSSCG00000000884	APAF1	5:85166459-85258392	6689	0.135285	0.153111	0.325676	0.990004	0.80594	0.992483	0.579073	0.3891	0.0859588	0.158689	0.171204	0.19077
ENSSSCT00000000970	ENSSSCG00000000886	SLC25A3	5:85284405-85292336	1393	29.2986	22.8807	107.171	111.021	142.84	135.902	76.5708	43.5427	44.5583	9.11081	16.5427	16.0571
ENSSSCT00000000971	ENSSSCG00000038487	TMPO	5:85319226-85346639	1564	0.0581482	0.19357	0.596813	3.83382e-05	0.00382184	1.78839e-05	1.08963e-07	4.99132e-13	9.08955e-22	9.8168e-18	0.118551	6.86413e-07
ENSSSCT00000000974	ENSSSCG00000000890	NEDD1	5:86695663-86737250	2034	0.237332	0.420507	1.12253	1.13025	1.6266	1.36053	0.779772	0.708101	1.63968	0.15947	0.27698	0.250191
ENSSSCT00000000975	ENSSSCG00000000891	LTA4H	5:87486712-87518357	1835	1.89873	1.78604	8.08895	16.0144	18.5829	19.0868	10.1829	5.88302	6.50128	2.58939	3.34445	3.21697
ENSSSCT00000000976	ENSSSCG00000000892	HAL	5:87522524-87547855	3818	0	0	6.7875e-05	0.290966	6.62057e-05	0	0	6.72808e-05	0	0	0	0
ENSSSCT00000000977	ENSSSCG00000000893	AMDHD1	5:87553021-87569246	1161	0.0332552	0	0	0.363032	0.0148778	0	0.088454	0.051872	0.067407	0.0151958	0	0.0149957
ENSSSCT00000000978	ENSSSCG00000000894	CCDC38	5:87576178-87614126	1638	0	0	7.81777e-08	0	0.0117408	0	0	3.9187e-94	5.70767e-111	1.09338e-09	0	0
ENSSSCT00000000979	ENSSSCG00000000895	SNRPF	5:87613931-87622951	1761	0.636116	0.348944	1.75508	2.62298	1.69967	2.86572	2.28964	1.63747	2.59269	0.483333	0.611035	0.633049
ENSSSCT00000000980	ENSSSCG00000000896	NTN4	5:87671870-87784701	3734	0.184713	0.173312	0.553347	0.815327	1.22721	1.28162	2.51834	1.5866	0.547854	0.22568	0.367665	0.403991
ENSSSCT00000000981	ENSSSCG00000000897	-	5:87942610-87946902	588	0	0	0	0	0.000161742	0	0	0	0	0	0	0
ENSSSCT00000000984	ENSSSCG00000000900	VEZT	5:88035641-88104732	3023	0.697046	0.562931	2.7909	6.51757	5.55328	5.00858	4.22669	3.11907	4.10939	0.814985	1.22639	1.03502
ENSSSCT00000000985	ENSSSCG00000000901	FGD6	5:88104233-88225248	4284	0.0981445	0.0755382	0.292114	0.520966	0.159598	0.351608	0.360103	0.468199	0.33896	0.0924252	0.122858	0.134112
ENSSSCT00000000986	ENSSSCG00000000902	NR2C1	5:88231261-88277997	3794	0.372179	0.368549	0.794338	2.59057	1.94942	2.00994	1.34495	0.718743	1.01812	0.257625	0.217252	0.162587
ENSSSCT00000000989	ENSSSCG00000000905	-	5:88292770-88317177	698	17.0008	19.1914	61.7826	86.5491	110.238	121.678	70.7308	43.3001	48.1389	10.3085	15.8941	13.3221
ENSSSCT00000000990	ENSSSCG00000000906	-	5:88606813-88679153	2514	0.164193	0.142469	0.739063	0.853244	0.704517	0.715167	0.530703	0.246333	0.204344	0.0195526	0.0834433	0.100473
ENSSSCT00000000991	ENSSSCG00000000907	PLXNC1	5:88900244-89055742	7120	0.000206405	0.137273	0.356469	0.378243	0.207526	0.244366	0.284758	0.084201	0.000205254	0.095649	0.14262	0.190637
ENSSSCT00000000992	ENSSSCG00000000908	-	5:89702681-89707784	444	2.10531	1.61342	6.11271	10.1962	11.0366	11.1257	10.641	8.56153	7.8839	1.07045	2.16337	2.95806
ENSSSCT00000000994	ENSSSCG00000000910	CRADD	5:89581082-89586275	2100	1.11241	1.17601	2.9046	10.6243	7.42157	6.17641	1.71281	0.552061	0.799152	0.33229	0.233386	0.285812
ENSSSCT00000000995	ENSSSCG00000000910	CRADD	5:89308385-89584530	1215	0.183522	0.175038	0.220424	1.29615	1.30675	1.09091	0.251784	0.0648566	0.491279	0.0374872	0.208368	0.174132
ENSSSCT00000000999	ENSSSCG00000000915	DCN	5:91678607-91713925	1482	26.3061	54.4658	77.5327	251.934	194.553	104.202	117.022	47.1234	42.2005	16.344	23.9594	22.3378
ENSSSCT00000001000	ENSSSCG00000000916	LUM	5:91748493-91760563	6498	0.656937	1.48776	5.35786	8.40299	10.5497	7.79984	13.198	4.05307	4.56586	1.18519	1.79987	1.78603
ENSSSCT00000001001	ENSSSCG00000000917	KERA	5:91796323-91801357	1020	0.582766	2.36323	2.7826	11.1133	3.17332	1.99014	0.825529	0.000201395	0.712129	7.78851e-05	0.105677	0.225676
ENSSSCT00000001002	ENSSSCG00000000918	EPYC	5:91841210-91876981	963	0	0.0224289	0	0	0.0218957	0	0	0.0225578	0	0	0	0
ENSSSCT00000001004	ENSSSCG00000000920	POC1B	5:93132081-93222520	3027	0.274227	0.211872	0.412189	1.06435	1.20001	1.27156	0.488855	0.166018	0.401787	0.11932	0.172823	7.36919e-06
ENSSSCT00000001005	ENSSSCG00000027898	ATP2B1	5:92936005-93061412	6905	0.555246	0.660881	2.07225	3.59784	4.00453	3.56683	2.33533	2.78041	3.66215	0.443133	0.695308	0.873146
ENSSSCT00000001006	ENSSSCG00000027898	ATP2B1	5:92938266-93058454	4262	0.520951	0.487508	0.70408	1.56864	2.10345	2.03766	0.863313	1.10358	1.05002	0.386755	0.790044	0.606358
ENSSSCT00000001009	ENSSSCG00000000924	C12orf50	5:94495453-94520115	1248	5.10829e-06	0.0331177	5.31287e-07	0	2.17829e-08	2.60117e-05	0.0928041	0.016049	0.0314983	0	0.0535965	5.07596e-06
ENSSSCT00000001010	ENSSSCG00000000925	C12orf29	5:94473175-94489661	3164	0.261724	0.198021	0.63782	2.1964	2.12855	2.2103	1.58919	1.14152	1.67617	0.161807	0.431532	0.266782
ENSSSCT00000001011	ENSSSCG00000000926	CEP290	5:94384887-94469001	6851	4.34027e-48	0.124837	0.126824	0.775895	0.677913	0.340505	0.327221	0.369688	0.377313	1.39736e-07	8.24755e-07	0.000659397
ENSSSCT00000001012	ENSSSCG00000000927	TMTC3	5:94324305-94375527	1738	0.288341	0.0334825	0.636325	0.00332781	0.3001	0.719573	3.94924	2.38649	1.74582e-07	0.245165	2.5733e-05	0.602155
ENSSSCT00000001018	ENSSSCG00000000932	NTS	5:96260551-96272970	1672	0.129787	0.0437008	0.118703	0.0689887	0.0397724	0.0423921	0.00597529	0.125839	0.0936815	0.0314526	0.0494175	0.0305695
ENSSSCT00000001020	ENSSSCG00000000934	LRRIQ1	5:96802825-97002425	5164	0.00713605	0.00359707	0.00701484	0.042381	0.116627	0.0764454	0.0250688	0.0178314	0.0102712	0.00359364	0.00354221	0
ENSSSCT00000001022	ENSSSCG00000000936	SLC6A15	5:97092946-97151922	7083	0.00258123	0.0182302	0.0228099	0.0568971	0.0321925	0.00752459	0.00258671	0.00257631	0.00494539	0	0.00256245	0
ENSSSCT00000001023	ENSSSCG00000026533	MYF6	5:100760486-100764767	3758	1.05288	1.29769	3.26892	2.18549	4.8605	3.92242	4.14558	3.07916	1.52206	1.07614	3.07887	3.50552
ENSSSCT00000001024	ENSSSCG00000000937	MYF5	5:100753500-100755494	766	0.235789	0.297084	1.12546	2.90808	2.31383	2.1451	1.1226	0.27057	0.321031	0.0296307	0.236139	0.11671
ENSSSCT00000001027	ENSSSCG00000000939	ACSS3	5:100288276-100429155	2119	0.456435	0.0974398	1.1219	1.79674	1.03706	1.31544	1.22208	0.575431	0.833539	0.267346	0.367011	0.415684
ENSSSCT00000001028	ENSSSCG00000000940	PPFIA2	5:99954699-100275562	3561	0.00525404	5.82128e-24	7.12123e-48	4.28861e-105	2.84477e-90	7.62117e-72	3.86184e-10	3.85432e-102	0	0	0	0
ENSSSCT00000001029	ENSSSCG00000000941	METTL25	5:99291612-99359244	2128	0.11126	5.11209e-10	0.165668	0.115398	0.304914	0.14403	0.354778	4.1343e-12	0.252235	0.0248862	3.38186e-21	0.0218979
ENSSSCT00000001030	ENSSSCG00000000941	METTL25	5:99291612-99359244	2158	6.37513e-12	0.248696	0.000103513	0.193324	0.00192212	0.78526	0.000255224	0.399933	0.000357085	0.000378675	1.62138e-24	2.1522e-64
ENSSSCT00000001032	ENSSSCG00000000943	OTOGL	5:101101457-101248996	6873	0.00266198	0.00537155	0.0156834	0.012757	0.0204326	0.0181087	0.00533568	0.00265707	0.00255029	0	0	0
ENSSSCT00000001037	ENSSSCG00000000948	SYT1	5:101871313-102394307	4531	3.85577e-08	0.0370226	0.0748858	0.0313008	0.00959639	0.07166	0.0723471	0.0459703	0	6.42434e-08	0.0121811	3.76627e-08
ENSSSCT00000001039	ENSSSCG00000000950	E2F7	5:104126951-104163407	5897	0.00934445	0.0188557	0.0275376	0.0746715	0.131573	0.290785	0.106184	0.0497633	0.0209004	0.0376778	0.0865953	0.0466051
ENSSSCT00000001040	ENSSSCG00000000951	-	5:104273628-104295140	899	1.71618	1.70581	5.44	3.93609	5.17581	6.66629	5.89042	1.86572	2.23502	0.510582	1.15994	1.36601
ENSSSCT00000001041	ENSSSCG00000000952	-	5:104303611-104395288	2366	0.319759	0.1469	1.64552	0.264517	0.344713	0.227975	0.348499	0.166025	0.0787084	1.50834e-05	0.371141	0.213906
ENSSSCT00000001044	ENSSSCG00000000955	TBC1D22A	5:2530530-2787149	1509	1.07278	1.09531	3.25455	3.72327	4.05804	3.79031	2.91068	1.81322	2.30073	0.413438	0.976323	0.750826
ENSSSCT00000001046	ENSSSCG00000028869	CAND1	5:31657591-31696887	5671	1.10461	0.876541	3.26263	4.69145	4.35806	4.01043	3.03786	1.5495	1.88043	0.548872	0.817809	0.775972
ENSSSCT00000001047	ENSSSCG00000000958	DYRK2	5:32047732-32057938	2165	2.23713	2.21713	5.20661	5.9682	7.15595	6.49897	2.6015	1.91497	3.46233	0.656627	0.972368	1.37458
ENSSSCT00000001048	ENSSSCG00000000959	-	AEMK02000361.1:214422-750753	3726	0.395203	0.222823	0.677666	0.917677	1.06861	2.20472	2.1085	2.02915	1.37611	0.483967	0.842501	0.998669
ENSSSCT00000001050	ENSSSCG00000000960	KLHDC7B	5:202136-203951	1815	0.0107959	0	0	0	0	0	0	0	0.0417833	0	0	0
ENSSSCT00000001054	ENSSSCG00000000964	LMF2	5:233297-258794	2946	0.881789	0.787308	2.43901	3.27923	3.09064	2.27931	3.34275	0.955317	1.42282	0.453804	0.480658	0.770507
ENSSSCT00000001055	ENSSSCG00000000965	NCAPH2	5:220764-233549	4171	0.512333	0.305633	1.57288	1.46313	1.47382	1.59304	1.315	0.966353	1.48427	0.202059	0.429259	0.34649
ENSSSCT00000001057	ENSSSCG00000000967	ODF3B	5:216065-217972	856	0	0	0	0	0	0	0	0.0260965	0	0	0	0
ENSSSCT00000001058	ENSSSCG00000000968	SBF1	5:266514-284163	5631	3.11436	1.56774	5.44096	4.23568	4.03587	3.35994	3.56131	2.29392	3.48024	0.829199	1.59791	2.0715
ENSSSCT00000001060	ENSSSCG00000000970	PPP6R2	5:285386-361301	3760	2.86346	1.69605	6.44355	7.09266	6.09818	4.98245	5.32152	4.73621	6.4598	1.26791	1.89161	1.90864
ENSSSCT00000001061	ENSSSCG00000000971	HDAC10	5:439835-445511	2845	0.294806	0.000717903	0.0026478	4.60532e-05	4.68038e-05	0.246408	0.301451	0.0634565	0.00023562	1.0101e-08	5.574e-05	0.262207
ENSSSCT00000001062	ENSSSCG00000000972	TUBGCP6	5:445717-467415	5175	0.892488	0.49306	1.55629	0.985126	0.922726	0.854852	0.919173	0.643369	1.05267	0.257662	0.28474	0.524971
ENSSSCT00000001063	ENSSSCG00000000973	SELENOO	5:467546-480836	2370	2.47404	1.01132	6.3209	4.47393	4.18716	3.81699	4.82271	3.71224	5.33321	0.765711	1.54381	1.36905
ENSSSCT00000001064	ENSSSCG00000000974	TRABD	5:486562-492066	1215	1.45483	0.682092	2.3252	3.72743	3.42768	3.75215	4.62401	2.94616	3.26308	0.521439	1.00863	1.30457
ENSSSCT00000001065	ENSSSCG00000000975	PANX2	5:497039-505979	3247	0.0636725	0.011679	0.0626894	0.0890641	0.027881	0.0169521	0.0465528	0.0173766	0.105766	0	0.0172569	0.0403861
ENSSSCT00000001066	ENSSSCG00000000976	MOV10L1	5:510306-565316	3285	0	0	0	0	0	0	0.0574794	0.0228859	0.0164954	0	0.0113644	0.0398958
ENSSSCT00000001068	ENSSSCG00000000978	MLC1	5:571693-594059	3953	0	0	0.00463409	0	0	0.00459187	1.14018	0.226086	0.104067	0.00949626	0.0748809	0.0610625
ENSSSCT00000001070	ENSSSCG00000000980	ALG12	5:716939-729397	4221	0.620431	0.359581	1.78278	1.31828	1.58674	1.2475	0.892331	0.64214	1.02655	0.199573	0.266618	0.478243
ENSSSCT00000001071	ENSSSCG00000000981	CRELD2	5:707716-716917	2948	0.467866	0.226294	1.43948	0.635254	0.895971	0.845407	0.702729	0.327243	0.462616	0.129168	0.273928	0.255479
ENSSSCT00000001072	ENSSSCG00000000982	TTLL8	5:599862-644833	2520	0	0	6.59201e-13	0	0.00621628	0	0	0	0	0	8.09865e-13	4.56276e-13
ENSSSCT00000001073	ENSSSCG00000000983	-	5:646946-662557	4597	0.0120821	0.0121895	0	0.00773136	0.00774183	0	0	0	0.00772957	0	0	0.00803241
ENSSSCT00000001075	ENSSSCG00000000985	EXOC2	7:195081-341433	3906	1.2364	1.1779	4.24156	4.88305	5.09492	5.31787	4.02042	2.05187	2.48342	0.780285	1.6637	1.47817
ENSSSCT00000001080	ENSSSCG00000001577	TBC1D22B	7:32839145-32912697	1730	0.304779	0.078898	0.263117	0.127119	0.122523	0.142296	0.160278	0.0276718	0.542924	0.0355031	3.71971e-78	0.0249123
ENSSSCT00000001081	ENSSSCG00000000991	FOXQ1	7:664372-665566	1194	0	0	0	0.0336441	0.0168949	0	0	0	0	0	0	0
ENSSSCT00000001084	ENSSSCG00000000994	GMDS	7:846180-1285584	4420	0.105109	0.0480398	0.395274	0.414358	0.302302	0.360191	0.26587	0.158412	0.255054	0.0935334	0.103875	0.222075
ENSSSCT00000001087	ENSSSCG00000000997	PPP1R3G	7:2965060-3057806	4931	6.29609	3.40846	10.0699	5.48803	10.0546	8.00203	1.68721	2.38351	5.11286	1.159	1.85236	2.15157
ENSSSCT00000001088	ENSSSCG00000000998	RPP40	7:2990402-3005638	4388	0.320977	0.0967347	0.523626	0.856184	0.832307	0.644049	0.466996	0.332031	0.573503	0.0601094	0.134054	0.151595
ENSSSCT00000001090	ENSSSCG00000000999	CDYL	7:2845808-2966058	2115	0.785997	0.848153	2.03044	1.67594	2.44943	1.94552	1.9912	1.02705	1.66798	0.368288	0.68193	0.691656
ENSSSCT00000001092	ENSSSCG00000001000	ECI2	7:2425614-2446259	2364	8.39086	5.62645	19.2786	19.0156	17.86	21.623	4.90946	3.57611	5.87953	1.77246	3.53949	3.00395
ENSSSCT00000001093	ENSSSCG00000001001	-	7:2419899-2431124	663	0.0179198	0	3.60738e-05	3.18873e-05	3.28307e-05	0.133338	3.39435e-05	0	3.23124e-05	3.56764e-05	0	0
ENSSSCT00000001094	ENSSSCG00000001002	PRPF4B	7:2360480-2412908	3244	0.87331	0.885495	2.07056	4.80152	4.69698	3.86472	1.69851	2.63947	3.25631	0.68711	0.973197	0.501385
ENSSSCT00000001096	ENSSSCG00000001004	SLC22A23	7:1991927-2059886	1224	0.00111145	0.114427	0.00298438	1.87014e-05	0.370726	0.296797	0.0182083	1.5788e-05	2.92311e-06	0.0527652	2.74981e-06	2.18722e-06
ENSSSCT00000001098	ENSSSCG00000001379	TUBB	7:23248026-23294218	2128	2.80268	2.58006	10.8831	4.88525	4.59383	8.18789	6.01204	3.11256	4.24906	1.20733	2.72771	2.38402
ENSSSCT00000001100	ENSSSCG00000001008	BPHL	7:1882730-1909853	1176	1.02998	0.744713	3.16294	2.35418	1.73315	1.37835	2.343	1.88288	2.45714	0.230083	0.666568	0.628793
ENSSSCT00000001101	ENSSSCG00000001009	RIPK1	7:1840950-1878998	2606	0.0947138	0.326787	0.576324	0.637179	0.654005	0.549286	0.66308	0.000218104	0.382491	0.0420851	0.343526	0.189555
ENSSSCT00000001102	ENSSSCG00000001010	-	7:1656441-1667876	3106	2.7719	1.57867	8.00406	7.57334	9.24995	7.78053	5.57471	3.99456	4.73218	0.97185	2.03751	1.82561
ENSSSCT00000001103	ENSSSCG00000001011	SERPINB1	7:1684214-1693281	2167	0.33524	0.298634	1.26418	1.45528	2.58764	1.40177	3.32617	1.04529	1.40695	0.436908	0.599428	0.84184
ENSSSCT00000001108	ENSSSCG00000038717	FARS2	7:3262355-3557258	1365	0.55619	0.746755	2.70347	2.25175	2.06896	2.18071	1.88584	1.35593	0.910579	0.404212	0.528828	0.864832
ENSSSCT00000001109	ENSSSCG00000026211	NRN1	7:3681830-3691969	2939	0.0128597	0	0.101345	0.49501	0	0.659688	1.35182	0.972048	0.433184	0.304527	1.17596	0.877843
ENSSSCT00000001114	ENSSSCG00000001021	RREB1	7:4579102-4638176	4896	2.67514	1.32854	2.85553	1.62568	1.61328	1.65637	1.66565	1.48142	2.17724	0.6047	1.08292	1.04234
ENSSSCT00000001115	ENSSSCG00000001022	SSR1	7:4662948-4685892	3368	4.61762	2.87147	10.4124	10.2608	8.05731	7.41455	8.1681	8.19758	8.39171	1.79629	2.3745	2.50404
ENSSSCT00000001117	ENSSSCG00000001024	RIOK1	7:4750486-4776256	2036	0.200909	0.14198	0.252136	2.38115	1.41039	1.71149	0.672902	0.385155	0.836837	0.150575	0.376239	0.186668
ENSSSCT00000001118	ENSSSCG00000001025	DSP	7:4862564-4919236	13399	0.0153038	0.00612747	0.00754341	0.0537653	0.0891126	0.0939685	0.0153025	0.0127411	0.00733744	0.0128582	0.0101478	0.00764961
ENSSSCT00000001119	ENSSSCG00000001025	DSP	7:4919297-4937363	3608	0.393865	0.481002	0.545676	1.64855	1.51153	1.04127	0.650848	0.611632	0.622525	0.188025	0.324392	0.201488
ENSSSCT00000001120	ENSSSCG00000001027	BMP6	7:5058035-5211316	4872	0.135067	0.172171	0.408825	0.778769	0.77979	0.609083	0.380477	0.174275	0.229179	0.0763571	0.0753173	0.189103
ENSSSCT00000001125	ENSSSCG00000034986	-	7:20728661-20729072	411	0.542281	0.839359	2.92194	18.0001	25.4772	56.759	18.7238	5.60609	2.10962	2.23671	6.98527	6.9259
ENSSSCT00000001126	ENSSSCG00000001033	SLC35B3	7:5581755-5606551	2661	0.0593143	4.13889e-06	0.21516	1.3306	1.09362	0.836173	0.278221	0.15374	0.0757758	0.208759	0.177575	4.90558e-06
ENSSSCT00000001129	ENSSSCG00000001036	TFAP2A	7:7223099-7236490	1366	0	0.044819	0.132287	0.0287693	0.0721957	0	0.0150258	0	0.0144034	0	0.014764	0.0294533
ENSSSCT00000001132	ENSSSCG00000001038	-	7:7462211-7469623	963	3.7373	3.40919	13.5953	19.686	20.0564	23.6365	18.3234	11.3691	8.29549	2.52903	4.48968	4.81083
ENSSSCT00000001134	ENSSSCG00000001040	C6orf52	7:7428058-7437987	3421	0	0.00552801	0.0107871	0.00526778	0.0105532	0.00534685	0	0	0	0	0	0.00546211
ENSSSCT00000001136	ENSSSCG00000001042	MAK	7:7481681-7538376	3490	0.0147792	2.064e-06	0.0441895	0.0770659	0.0704796	0.017875	0.0453452	0.046674	0.106444	0.00532984	0.00525176	0.0159707
ENSSSCT00000001139	ENSSSCG00000001045	ELOVL2	7:7652225-7732262	3227	1.42059e-17	1.35708e-36	3.56338e-08	2.48646e-06	0.000213769	4.5675e-26	0.016164	0	3.03898e-13	0.00587017	0.00578872	0
ENSSSCT00000001140	ENSSSCG00000023956	-	7:7806947-7842458	5115	0.0184738	0.12705	0.0966964	0.220047	0.188118	0.103799	0.152098	0.0301317	0.0535935	0.0171344	0.123434	0.0584943
ENSSSCT00000001142	ENSSSCG00000001048	ADTRP	7:8243294-8313651	1918	0	0	0	0	0	0	0	0.0102059	0.0196527	0	0.0101145	0
ENSSSCT00000001143	ENSSSCG00000001049	HIVEP1	7:8519344-8661137	8487	0.167198	0.703486	0.453621	0.0010323	0.000108864	0.0693912	0.0189044	0.00952817	0.140951	0.168833	4.94191e-05	0.248312
ENSSSCT00000001146	ENSSSCG00000001052	PHACTR1	7:9448433-9663850	1770	2.18432e-119	5.89086e-40	7.81835e-83	1.71342e-98	4.47722e-49	1.66291e-06	0.0155855	1.19379e-16	2.98213e-23	0.0124838	0.0171696	4.1708e-24
ENSSSCT00000001147	ENSSSCG00000001053	TBC1D7	7:9685273-9707478	1498	0.291477	0.00426346	0.684454	0.577652	0.43746	0.34247	1.17631	0.00161187	0.712177	0.449433	0.657849	1.50281e-05
ENSSSCT00000001150	ENSSSCG00000001056	RANBP9	7:9976957-10057257	1788	1.57208	1.57449	4.10875	7.62765	6.69697	6.02307	7.19651	4.19957	5.63484	1.11937	1.62056	1.23172
ENSSSCT00000001151	ENSSSCG00000001057	MCUR1	7:10119566-10142909	1437	0.699534	0.637973	1.91117	1.18089	1.62103	1.11957	0.950052	0.563699	0.804847	0.197223	0.25124	0.361706
ENSSSCT00000001155	ENSSSCG00000001061	JARID2	7:11469782-11600306	3702	0.0125229	7.12287e-09	0.000158613	2.33835e-10	1.35873e-08	1.55854e-11	2.05748e-05	1.13573e-08	5.61665e-08	7.37006e-07	4.8828e-33	4.3942e-05
ENSSSCT00000001157	ENSSSCG00000001062	DTNBP1	7:11602394-11720286	1367	1.98345	1.16436	5.63955	4.35502	5.41018	5.31454	7.4421	5.53505	4.97978	0.87052	1.20972	2.01596
ENSSSCT00000001158	ENSSSCG00000001063	-	7:12117239-12137926	3058	1.16535	1.27514	2.23473	7.59875	6.52511	3.96279	1.28978	1.01217	2.15345	0.19883	0.441227	0.57763
ENSSSCT00000001159	ENSSSCG00000001064	GMPR	7:12254387-12294555	1587	17.9699	14.8545	59.2199	57.3486	87.9032	75.7313	78.3348	46.4004	46.0152	10.1362	13.2963	17.0368
ENSSSCT00000001160	ENSSSCG00000001065	ATXN1	7:12304693-12556417	2817	1.49295e-06	2.04498e-06	6.44519e-07	6.15998e-07	1.50048e-06	1.45007e-06	1.46616e-05	1.10828e-06	5.58642e-06	1.40942e-05	5.5517e-06	1.19514e-06
ENSSSCT00000001162	ENSSSCG00000001067	STMND1	7:13024129-13039651	729	0	0	0	0	0	0.0318206	0.0323507	0	0	0	0	0
ENSSSCT00000001163	ENSSSCG00000001068	CAP2	7:13230453-13350961	2890	0.732723	2.15005	2.7202	10.6288	13.9873	15.8582	10.6334	10.1166	9.92685	2.50766	3.46633	3.09616
ENSSSCT00000001165	ENSSSCG00000001070	FAM8A1	7:13378151-13390890	4367	1.5376	1.39699	3.1031	10.1949	12.6104	7.92699	5.18447	3.6635	4.64795	0.787726	0.77206	0.95722
ENSSSCT00000001166	ENSSSCG00000020858	KIF13A	7:13502626-13600634	4890	0.320437	0.228561	0.529478	0.575246	0.372563	0.783699	0.14363	0.411602	0.473483	0.0450648	0.380777	3.71792e-05
ENSSSCT00000001167	ENSSSCG00000001072	NHLRC1	7:13816245-13817644	1399	0.389331	0.159967	0.743726	0.573843	1.46095	0.841022	1.50596	0.697421	1.63967	0.232299	0.287402	0.21505
ENSSSCT00000001168	ENSSSCG00000001073	TPMT	7:13820890-13846247	1956	0.0497424	0.120417	0.461999	0.759179	0.529954	0.713254	1.39591	0.479438	0.798122	0.0901921	0.356393	0.178271
ENSSSCT00000001169	ENSSSCG00000001074	KDM1B	7:13845941-13901253	4827	0.241819	0.272138	0.578035	1.36993	1.15231	1.05393	0.83366	0.640644	0.668567	0.146655	0.168179	0.182968
ENSSSCT00000001170	ENSSSCG00000001075	-	7:13901580-13934874	2848	1.28962	3.05793	5.1808	33.4453	30.2211	24.8788	18.8347	13.0334	14.3221	1.7617	2.33259	2.3913
ENSSSCT00000001171	ENSSSCG00000001076	RNF144B	7:14039857-14125654	5257	0.2291	0.389205	0.08129	0.775686	1.19298	0.684612	0.518937	0.29245	0.450603	0.204375	0.32226	0.0251708
ENSSSCT00000001173	ENSSSCG00000001078	MBOAT1	7:15532072-15643988	4130	0.130531	0.154394	0.314296	0.933673	0.83547	0.557	0.429322	0.175476	0.267955	0.0725849	0.111778	0.130152
ENSSSCT00000001175	ENSSSCG00000001080	CDKAL1	7:15910689-16570695	3268	0.121682	0.0469801	0.594996	0.676153	1.14946	0.824329	0.946257	0.721051	0.556818	0.132356	0.177991	0.300465
ENSSSCT00000001176	ENSSSCG00000001081	SOX4	7:16891318-16892752	1434	0.46278	0.39601	0.625719	1.11569	0.846594	0.817448	0.938107	0.339025	0.449549	0.056482	0.251525	0.306779
ENSSSCT00000001178	ENSSSCG00000001083	-	7:17695811-17696497	654	0	0	0	0.0718662	0.0362475	0.0738249	0	0	0	0	0	0
ENSSSCT00000001180	ENSSSCG00000001085	DCDC2	7:19050010-19218914	1404	0	0	0	0	0.0839408	0.0425884	0.0291227	0.0144705	0	0	0.0286242	0.0142793
ENSSSCT00000001183	ENSSSCG00000001087	MRS2	7:19244659-19295802	6492	0.202147	0.138572	0.319725	0.832091	0.850964	0.835177	0.370486	0.595222	0.557507	0.0545955	0.134234	0.115875
ENSSSCT00000001184	ENSSSCG00000001088	-	7:19272031-19272388	357	0.180937	0	0.287533	0	0.194675	0.100176	0.395836	0.580691	0.482531	0.180805	0.0923981	0.176096
ENSSSCT00000001185	ENSSSCG00000001089	GPLD1	7:19291180-19346312	4871	1.60385e-14	1.45155e-26	4.18723e-23	2.54045e-30	4.1348e-27	2.09542e-31	1.7037e-45	4.25472e-29	4.83802e-25	1.87478e-33	3.65064e-24	2.56366e-25
ENSSSCT00000001186	ENSSSCG00000001090	ALDH5A1	7:19351591-19375476	1512	0.799297	0.120386	1.36752	0.863406	0.898641	0.498767	0.707654	1.03007	0.501902	0.148093	0.0544109	0.256273
ENSSSCT00000001187	ENSSSCG00000001091	KIAA0319	7:19386110-19451666	2733	0.0208338	0.0070056	0.0205324	0.0133733	0.00670001	0.00679075	0.0139788	0.0069556	0	0.0139952	0.00690386	0
ENSSSCT00000001188	ENSSSCG00000001092	TDP2	7:19488919-19502546	2736	0.616791	0.360729	1.07159	2.93876	3.53019	2.70415	3.18269	2.38294	2.13525	0.430614	0.682332	0.612808
ENSSSCT00000001189	ENSSSCG00000036411	ACOT13	7:19502636-19519820	820	4.00629	3.64074	13.8728	31.3748	29.3405	37.5288	11.7002	9.01328	13.4309	2.59842	3.8971	3.48266
ENSSSCT00000001191	ENSSSCG00000001095	GMNN	7:19586001-19595344	1481	0.402547	0.288457	0.628466	2.32614	1.55201	1.5414	1.97596	0.52143	0.557294	0.0933658	0.0665191	0.096084
ENSSSCT00000001192	ENSSSCG00000001096	ARMH2	7:19599098-19601900	708	0	0	0	0.0322673	0.0975665	0.033099	0	0	0.0323981	0	0	0
ENSSSCT00000001193	ENSSSCG00000001097	-	7:19611116-19672144	3218	2.7946e-09	2.09504e-41	3.90865e-25	0.229028	0.0283666	3.75405e-26	4.00647e-32	4.83116e-59	0.0280664	1.12536e-05	1.08972e-15	1.39503e-31
ENSSSCT00000001194	ENSSSCG00000001098	-	7:19631179-19632596	1047	8.64716e-05	8.43732e-05	8.87202e-05	8.13637e-05	8.21329e-05	8.40314e-05	0	0.101932	7.42882e-05	8.916e-05	0	0
ENSSSCT00000001195	ENSSSCG00000001099	CMAH	7:19873778-19955840	2790	0.0407646	0.0479767	0.133899	0.294331	0.511176	0.438381	0.369194	0.258554	0.242046	0.102691	0.101309	0.223406
ENSSSCT00000001196	ENSSSCG00000001100	CARMIL1	7:20037410-20345470	4031	0.0921146	0.247104	0.235252	0.79455	0.680262	0.475007	0.340313	0.0977977	0.243646	0.0525375	0.0752755	0.0814878
ENSSSCT00000001197	ENSSSCG00000001101	SCGN	7:20389492-20432978	1507	0	0	0	0	0	0	0.0134334	0	0	0	0	0
ENSSSCT00000001227	ENSSSCG00000001131	-	7:20954860-20967000	1752	0.011223	0.0339595	0.0999111	0.0108559	0.0762159	0.0331285	0.0340304	0.0338385	0.0977831	0.0113038	0.0223455	0.0111687
ENSSSCT00000001230	ENSSSCG00000031122	HIST1H2BB	7:20735560-20735941	381	0.88766	2.92299	5.59652	25.845	40.7534	75.7748	36.8189	8.31515	3.49014	4.03564	8.62764	7.32314
ENSSSCT00000001233	ENSSSCG00000001137	HIST1H1D	7:20862941-20882693	1208	3.69633	3.4438	13.2132	23.7831	29.856	49.7111	27.8378	7.93389	5.40189	2.59392	3.94182	4.0985
ENSSSCT00000001254	ENSSSCG00000001156	ZNF322	7:21128049-21143385	4517	0.276496	0.160891	0.604714	1.154	1.63854	1.44635	0.967757	0.525388	0.474397	0.00641867	0.100236	4.09728e-06
ENSSSCT00000001262	ENSSSCG00000001164	ZNF184	7:21413424-21420031	2617	0.0223958	0.0413929	3.26076e-09	0.0390134	1.13197e-05	3.16966e-21	5.96861e-06	7.83845e-14	5.98296e-06	4.09045e-16	4.66382e-06	5.36359e-43
ENSSSCT00000001263	ENSSSCG00000040923	HIST1H2BN	7:21606835-21607215	357	0.768981	0.576305	3.30982	18.6735	22.5029	49.2912	23.0772	4.00031	2.79868	1.88338	4.01932	5.62039
ENSSSCT00000001265	ENSSSCG00000038403	-	7:5552492-5552968	476	0.790882	1.59284	2.93556	4.73763	6.89798	8.20965	4.39342	2.09103	2.60416	0.509739	0.856177	0.943412
ENSSSCT00000001267	ENSSSCG00000032609	HIST1H2AJ	7:21592996-21593389	393	0.30623	0.308163	1.60328	21.3653	20.4059	71.0384	33.5514	6.97265	2.16993	1.68528	5.29395	4.33775
ENSSSCT00000001278	ENSSSCG00000035803	OR2B6	7:21687799-21688729	930	0	0	0.0463705	0.0681991	0	0	0	0	0	0	0	0.0230071
ENSSSCT00000001280	ENSSSCG00000039401	OR2B2	7:21651443-21652382	939	0	0.046238	0.0229122	0	0	0	0	0.0232654	0.067565	0	0	0.0227432
ENSSSCT00000001294	ENSSSCG00000001196	-	7:21925367-21926306	939	0	0	0.0229122	0	0.0225904	0	0	0.0232654	0.0225217	0.0230684	0	0
ENSSSCT00000001295	ENSSSCG00000001197	ZNF165	7:21936250-21946015	2917	0.023056	0.0653821	0.0542867	0.362462	0.493723	0.2971	0.203997	0.112029	0.11259	0.0359152	0.0386531	0.001745
ENSSSCT00000001299	ENSSSCG00000001201	ZKSCAN8	7:21981149-22000834	7149	0.623051	0.314876	0.390657	0.608057	0.713124	0.714109	0.450222	0.030184	0.821745	0.0996046	0.0945969	0.282091
ENSSSCT00000001300	ENSSSCG00000001202	-	7:22010408-22011463	961	0.426359	0.24587	1.14097	0.720013	0.977164	0.718272	0.455224	0.507074	0.757724	0.175152	0.183654	0.233778
ENSSSCT00000001301	ENSSSCG00000001203	ZSCAN9	7:22082219-22088469	1722	0.0800696	0.0576856	0.384761	0.398409	0.266404	0.506629	0.0462551	0.0229961	0.155069	0.0230411	0.0113881	0.0569123
ENSSSCT00000001302	ENSSSCG00000001204	-	7:22093091-22101837	2385	0.0562142	0.0405041	0.388167	0.565116	0.46552	0.432579	0.234642	0.096604	0.309761	0.097092	0.0798633	0.0719919
ENSSSCT00000001303	ENSSSCG00000001205	NKAPL	7:22108646-22110123	1477	0.0542635	0.0273636	0.134457	0.263106	0.277224	0.214301	0.0962046	0.0956192	0.0921945	0.0136602	0.108124	0.0809467
ENSSSCT00000001304	ENSSSCG00000001206	ZSCAN26	7:22114799-22133061	2348	0.514449	0.0850023	1.06347	0.918176	0.946241	0.74422	0.540432	0.731494	0.761215	0.189224	0.131051	0.213328
ENSSSCT00000001305	ENSSSCG00000001207	PGBD1	7:22135916-22155657	3108	0.304515	0.246618	0.824023	1.30103	1.42241	1.22342	1.01143	0.700559	0.881739	0.107935	0.282287	0.422868
ENSSSCT00000001307	ENSSSCG00000001209	ZSCAN12	7:22189820-22208745	3163	0.910397	0.642298	1.74312	2.15764	1.59388	1.67912	1.21451	1.00639	1.25916	0.257842	0.484906	0.249082
ENSSSCT00000001314	ENSSSCG00000001216	-	7:22316446-22332344	2067	0.037478	0.00945098	0.0786516	0.266827	0.0906795	0.202273	0.0661686	0.0282079	0.0904992	0.0188774	0	0.0186583
ENSSSCT00000001317	ENSSSCG00000001219	TRIM27	AEMK02000264.1:139242-156795	1923	0.297627	0.0118789	0.759115	0.197533	0.434119	0.769195	0.0762455	0.317121	0.184456	0.0554743	1.06546e-05	0.000221931
ENSSSCT00000001327	ENSSSCG00000001398	-	7:23645335-23649301	1170	2.0829e-40	0.167893	1.12375e-07	0.646536	2.82668e-05	0.42218	1.0333	2.10909e-06	0.330346	0.262351	0.131871	0.63453
ENSSSCT00000001329	ENSSSCG00000001229	-	7:22888582-22962547	4887	0.624734	0.907417	2.43877	1.7248	3.7251	1.54098	12.654	3.7342	3.53705	2.85572	1.43588	3.23162
ENSSSCT00000001330	ENSSSCG00000001396	-	7:23622803-23624465	732	0.492909	0.443144	0.791916	2.45175	2.59153	2.0721	1.5455	1.43662	1.00639	1.19965	0.948411	1.72373
ENSSSCT00000001333	ENSSSCG00000030767	SLA-5	7:22851887-22854864	1062	3.53794e-09	3.25261e-10	1.38694e-08	7.5771e-09	5.41446e-10	2.72148e-08	4.32025e-10	1.86111e-09	8.31356e-10	1.60139e-08	1.5725e-09	1.02467e-09
ENSSSCT00000001334	ENSSSCG00000030767	SLA-5	7:22851887-22855142	1017	2.2851e-07	6.80384e-19	7.88031e-05	0.0969102	7.0641e-08	7.70562e-05	7.94749e-08	7.8127e-05	1.51888e-09	7.84675e-05	1.51514e-07	1.25959e-07
ENSSSCT00000001335	ENSSSCG00000030767	SLA-5	7:22851877-22854864	1077	9.22136e-10	1.23535e-11	8.54355e-10	6.05113e-12	1.04331e-10	2.09854e-09	8.04243e-11	6.02684e-11	1.70762e-10	1.03363e-09	3.60255e-10	2.16998e-10
ENSSSCT00000001336	ENSSSCG00000001398	-	7:23635383-23638441	1068	0.17944	0.317356	1.08156	1.42535	2.78414	1.45273	2.57106	0.814609	2.27446	0.396245	0.364517	0.529793
ENSSSCT00000001338	ENSSSCG00000001398	-	7:23631151-23649244	897	0.047544	2.54476e-41	0.0614348	0.0503151	2.64275e-43	8.86122e-51	9.00861e-23	2.33307e-28	0.0286014	0.0544795	0.365084	0.178802
ENSSSCT00000001343	ENSSSCG00000001234	TRIM10	7:22718482-22728420	1144	0.0181552	0.0183073	0.0270632	0	0.0132039	0	0	0	0	0	0	0
ENSSSCT00000001349	ENSSSCG00000024259	PPP1R11	7:22633899-22636984	1605	1.48374	1.17224	4.40722	3.43675	4.10251	3.57057	3.71588	2.22642	2.13361	0.821831	1.48996	1.38997
ENSSSCT00000001359	ENSSSCG00000001245	ZNRD1	7:22626845-22631557	769	1.15312	0.767274	3.98694	3.90396	4.32331	4.47496	4.21415	1.71118	1.84175	0.451419	0.874906	0.909307
ENSSSCT00000001361	ENSSSCG00000001247	ZFP57	7:22607419-22612064	1825	0.0965794	0.064943	0.254643	0.124494	0.260101	0.34819	0.271023	0.247958	2.60595	0.389117	0.0213626	0.128168
ENSSSCT00000001362	ENSSSCG00000001248	MOG	7:22595564-22606450	627	4.22978e-06	0	0	0	0	0	0	0	0	0	0	0
ENSSSCT00000001368	ENSSSCG00000001253	-	7:22498676-22499608	932	0	0	0.046248	0	0.0684041	0.0695092	0.0473351	0.0234802	0.0454633	0	0	0
ENSSSCT00000001369	ENSSSCG00000001254	-	7:22459334-22465490	945	0	0	0	0	0	0	0	0.0057711	0	0	0	0
ENSSSCT00000001370	ENSSSCG00000001255	-	AEMK02000453.1:20237-21199	962	0	0	0	0	0	0.0222748	0	0	0	0	0	0
ENSSSCT00000001371	ENSSSCG00000001256	-	AEMK02000453.1:34682-35628	921	0	0	0	0	0	0	0	0	0.0230697	0	0	0
ENSSSCT00000001373	ENSSSCG00000001258	-	AEMK02000453.1:50465-51395	867	0	0	0	0	0	0	0	0	0.0248863	0	0	0
ENSSSCT00000001457	ENSSSCG00000001341	-	7:23005303-23046804	1403	0.171263	0.532211	1.09923	2.80537	1.51749	4.2571	0.481707	0.431941	0.658906	2.56634e-10	3.00785e-17	2.21096
ENSSSCT00000001458	ENSSSCG00000001342	-	7:23050194-23064498	1638	0.3143	0.268233	0.921395	0.994835	1.11538	0.786021	0.807097	0.474153	0.843482	0.0852206	0.228717	0.240539
ENSSSCT00000001460	ENSSSCG00000001372	GNL1	7:23102876-23112158	1914	1.40894e-05	8.68396e-07	0.0983973	3.48904e-06	0.0744663	0.145966	0.329139	0.284564	0.265343	0.133214	1.79026e-06	2.81746e-06
ENSSSCT00000001462	ENSSSCG00000001346	ABCF1	7:23126337-23143436	2424	1.57239e-05	0.0592186	0.151247	0.0844587	1.15234e-05	0.0835449	0.0329888	0.0664444	0.35474	0.497627	0.106528	0.134524
ENSSSCT00000001493	ENSSSCG00000001372	GNL1	7:23102769-23112950	2467	0.588332	0.473499	1.85238	3.30199	2.42472	1.76957	1.92958	0.791153	0.717761	0.25964	0.721759	0.551418
ENSSSCT00000001498	ENSSSCG00000001376	DHX16	7:23186469-23208507	8057	0.790722	0.488889	1.92729	1.44062	1.52138	1.3794	1.02385	1.01661	1.53109	0.255494	0.503159	0.488953
ENSSSCT00000001501	ENSSSCG00000001379	TUBB	7:23248026-23253787	3833	0.0209487	0.0210001	0.0411417	0.0301263	2.71702e-62	0.0407172	0.0315363	0.0209324	0.0200903	2.96355e-48	1.62399e-97	0.0208751
ENSSSCT00000001504	ENSSSCG00000001382	DDR1	7:23376085-23390712	3110	1.98789	1.40892	3.07674	6.26827	5.47831	4.49019	1.64366	1.23709	1.55194	0.340029	0.437766	0.624067
ENSSSCT00000001505	ENSSSCG00000001383	GTF2H4	7:23398384-23404128	1678	0.49434	0.368011	1.2929	1.19613	1.49691	1.29811	1.89255	0.863913	1.64188	0.260788	0.539092	0.456736
ENSSSCT00000001506	ENSSSCG00000001384	VARS2	7:23405022-23549747	2985	1.08237	0.605377	2.68846	2.88247	2.40828	2.32135	1.28846	1.14955	1.84589	0.213031	0.413891	0.77826
ENSSSCT00000001514	ENSSSCG00000001391	CCHCR1	7:23544128-23558270	2879	7.085e-06	1.83102e-06	0.0440319	6.25671e-06	0.0193614	1.16572e-05	0.0589848	1.23029e-05	6.91024e-06	1.57813e-08	0.0951763	0.0575369
ENSSSCT00000001516	ENSSSCG00000001393	-	7:23564907-23570600	1083	0	0	0.0192791	0	0.0379552	0	0	0	0	0	0	0.0192159
ENSSSCT00000001518	ENSSSCG00000001394	-	7:23596300-23609638	1796	0.0760049	0.103304	0.441322	1.43343	1.58891	1.76928	1.80742	0.321218	0.712602	0.184153	0.202425	0.428796
ENSSSCT00000001520	ENSSSCG00000001395	-	7:23616983-23621159	944	0.0113924	0.0229718	0.193487	0.301282	0.504946	0.478869	0.663968	0.242701	0.514603	0.080226	0.15938	0.146894
ENSSSCT00000001522	ENSSSCG00000001396	-	7:23622447-23628588	4292	0.0204205	0.0163062	0.164166	0.279736	0.264167	0.140268	0.190387	0.00257683	0.0531098	0.0522079	0.199254	0.11658
ENSSSCT00000001524	ENSSSCG00000024161	-	7:22974216-22976930	1029	0.138288	0.146535	0.163528	0.0974328	1.66666e-06	0.00480193	0.308673	0.370386	0.353602	0.219454	0.0607911	0.203789
ENSSSCT00000001525	ENSSSCG00000001398	-	7:23645359-23649269	1081	4.62203e-51	0.000134024	3.08789e-07	5.23728e-06	1.39674e-22	2.31482e-05	3.85526e-06	3.96275e-09	1.23474e-06	5.60728e-07	2.12522e-08	2.98242e-06
ENSSSCT00000001526	ENSSSCG00000001398	-	7:23645509-23649250	810	2.25735e-54	6.21862e-28	0.126134	1.68456e-21	9.03644e-68	5.52638e-48	0.0545264	2.04262e-25	1.70196e-15	5.76307e-09	1.17762e-20	0.102647
ENSSSCT00000001527	ENSSSCG00000001398	-	7:23646089-23649244	1051	0.000704011	0.0761598	2.79504e-17	3.6593e-08	1.51885e-23	9.70825e-24	0.0523873	6.05784e-09	3.32288e-12	0.135139	2.03329e-05	1.5342e-07
ENSSSCT00000001529	ENSSSCG00000001400	DDX39B	7:23658311-23669155	1581	7.35052	8.04392	19.9364	14.108	10.6933	13.3692	11.3687	6.87235	13.3828	2.99579	5.04333	4.7331
ENSSSCT00000001531	ENSSSCG00000001402	NFKBIL1	7:23673940-23685087	1504	2.42704	1.69947	4.67764	6.67717	7.78888	6.38615	5.65309	3.73531	5.03471	0.843433	1.432	1.63125
ENSSSCT00000001533	ENSSSCG00000001404	TNF	7:23699560-23703534	2881	0	0.00662469	0	0.0126409	0.0316627	0.00641792	0.0462477	0.0263013	0.0568916	0.00661729	0.0456932	0.0523513
ENSSSCT00000001535	ENSSSCG00000001405	LTB	7:23703820-23706738	1948	0.0699508	0.0604778	0.157548	0.499598	0.32909	0.510375	0.433586	0.0602	0.280125	0.0201321	0.178996	0.0998178
ENSSSCT00000001538	ENSSSCG00000001407	-	7:23713256-23716035	844	0	0	0	0	0	0	0	0	0.0514998	0	0.0261242	0.0776302
ENSSSCT00000001540	ENSSSCG00000001409	PRRC2A	7:23742342-23755885	6503	5.61478	2.88505	6.30261	4.97461	3.44438	4.17342	4.7286	3.59707	6.4047	1.92548	3.4081	3.87136
ENSSSCT00000001542	ENSSSCG00000001410	BAG6	7:23756983-23768515	3542	2.44798	1.7377	4.48272	2.81256	2.56652	3.16791	2.0336	1.17598	2.33403	0.540147	0.645986	0.949594
ENSSSCT00000001547	ENSSSCG00000001411	APOM	7:23770895-23774428	1792	0.111653	0.165637	0.340066	0.548821	0.581161	0.556124	0.203389	1.66249e-05	0.313554	0.0205026	0.101184	0.0894627
ENSSSCT00000001551	ENSSSCG00000001414	-	7:23781802-23785745	323	7.73504e-128	2.68033e-41	3.22818e-120	2.58663e-42	8.1874e-37	3.24929e-55	1.33843e-32	0.200833	3.07848e-66	0.00272248	4.43011e-111	0.249393
ENSSSCT00000001553	ENSSSCG00000001416	LY6G5C	7:23791578-23795734	441	0	0	0	0	0	0.0676015	0.0676827	0	0	0	0	0
ENSSSCT00000001555	ENSSSCG00000001418	NEU1	7:23953720-23958659	1935	1.03681	0.700587	2.1983	2.37284	2.01845	2.07645	2.1138	1.00063	1.50832	0.314333	0.971678	0.731517
ENSSSCT00000001556	ENSSSCG00000001419	SLC44A4	7:23959057-23978188	2763	0.157883	3.13152e-10	0.260581	0.0669958	0.206872	0.228198	0.215	0.13167	0.279658	0.0968359	0.054593	0.0988032
ENSSSCT00000001559	ENSSSCG00000001420	EHMT2	7:23978007-23992666	3637	0.68145	0.331875	1.17308	0.940633	1.22885	1.48853	1.33091	0.729078	1.41915	0.276718	0.474785	0.544976
ENSSSCT00000001560	ENSSSCG00000001420	EHMT2	7:23978007-23992666	3535	0.14508	0.160183	0.0651896	8.78466e-05	3.77788e-05	0.000108508	0.213366	8.98209e-06	0.271343	0.0510812	8.11542e-05	0.0220785
ENSSSCT00000001561	ENSSSCG00000001421	ZBTB12	7:23994529-23996980	1947	0.439937	0.201706	0.66194	0.415327	0.522972	0.530308	0.272527	0.160624	0.347938	0.080574	0.159197	0.218981
ENSSSCT00000001563	ENSSSCG00000001422	C2	7:24020322-24034120	2919	0.0906707	0.0664241	0.347945	1.35746	3.1604	0.358171	0.726029	0.184285	0.929299	0.286518	0.155525	0.964269
ENSSSCT00000001564	ENSSSCG00000024914	-	7:24033586-24040523	3337	0.538372	0.629416	1.13819	1.56467	1.61218	0.318858	1.01338e-06	1.20226e-281	4.05336e-29	3.95939e-175	1.57423e-32	0.0265092
ENSSSCT00000001565	ENSSSCG00000001423	NELFE	7:24040367-24046983	1677	1.07879	1.06368	4.57914	5.85548	4.75231	4.34338	4.1876	1.71029	3.06804	0.235964	0.705183	0.825104
ENSSSCT00000001566	ENSSSCG00000001424	-	7:24046964-24057621	3934	1.48177	0.796893	3.23519	2.69967	2.76969	2.29527	1.93499	1.54358	1.8084	0.394727	0.806111	1.05177
ENSSSCT00000001567	ENSSSCG00000001425	DXO	7:24057669-24060446	1907	0.429553	0.376537	1.2938	1.04672	0.982094	0.58075	0.802967	0.380016	0.850713	0.154531	0.412223	0.274884
ENSSSCT00000001568	ENSSSCG00000001426	STK19	7:24059451-24067398	1883	0.576669	0.394698	1.57155	1.91793	1.7938	1.75074	1.33944	0.610197	1.04746	0.101404	0.282999	0.338308
ENSSSCT00000001570	ENSSSCG00000001427	C4A	7:24068069-24086128	8401	0.299243	0.0962655	0.481011	5.09758	3.62615	0.793894	1.19468	0.253139	1.30801	0.472185	0.284112	1.22026
ENSSSCT00000001571	ENSSSCG00000001428	CYP21A2	7:24086257-24089371	2055	1.59347	0.656245	3.20339	3.92332	5.96845	3.81234	4.2238	1.45724	1.3935	0.47492	0.928731	0.844925
ENSSSCT00000001575	ENSSSCG00000001430	ATF6B	7:24161052-24171742	2611	1.20287	0.738148	2.14164	3.68623	2.96179	2.65888	2.09909	1.43883	1.65759	0.470115	0.906031	0.762585
ENSSSCT00000001582	ENSSSCG00000001434	EGFL8	7:24201650-24204978	1298	0.353956	0.142488	1.15356	1.46487	1.99155	1.67924	2.24733	0.380042	0.366761	0.0316097	0.140865	0.109221
ENSSSCT00000001585	ENSSSCG00000001436	RNF5	7:24215489-24217983	1255	1.82732	1.53014	5.88392	4.03065	3.44172	3.81695	5.03863	3.4741	3.40125	1.2154	2.1801	2.20492
ENSSSCT00000001586	ENSSSCG00000001437	AGER	7:24217771-24221082	1732	0.0909261	0.0917102	0.427265	0.175931	0.154399	0.145413	0.172341	0.194213	0.165074	0.0572369	0.113154	0.113103
ENSSSCT00000001590	ENSSSCG00000001438	PBX2	7:24222625-24226493	1182	0.314155	0.580261	1.2255	1.48428	0.760763	0.630374	0.709039	0.0571835	0.19636	3.95445e-06	0.323592	0.349024
ENSSSCT00000001592	ENSSSCG00000001439	GPSM3	7:24227572-24229776	1527	0.0451506	0.131817	0.128192	0.114004	0.216072	0.116052	0.26468	0.117305	0.0887683	0.0526455	0.0870316	0.303512
ENSSSCT00000001593	ENSSSCG00000001440	NOTCH4	7:24231883-24256141	5984	0.95117	0.520073	1.95904	1.58579	1.5228	1.68273	2.19339	1.43889	1.14993	0.349501	0.779891	0.988586
ENSSSCT00000001598	ENSSSCG00000001444	-	7:24408484-24410008	1524	0	0	0	0.0126957	0	0	0	0	0	0	0	0
ENSSSCT00000001605	ENSSSCG00000025071	BTNL2	7:24786952-24810227	7345	0	0	0	0	0	0	0	0.00248219	0.00238226	0	0	0
ENSSSCT00000001609	ENSSSCG00000001453	HLA-DRA	7:24825010-24830844	1488	1.14355	1.28052	6.42653	13.123	20.3718	20.7116	47.7488	13.4101	14.8568	6.7444	6.21901	17.7016
ENSSSCT00000001610	ENSSSCG00000001455	-	7:24882491-24903939	741	4.11073e-10	4.91412e-06	0.153638	0.0143033	0.0180849	1.07955e-19	0.0848465	0.281857	2.5336e-07	0.0533436	0.0130084	0.217588
ENSSSCT00000001612	ENSSSCG00000001455	-	7:24901395-24914037	1252	0.442885	0.168893	1.7131	2.83514	3.25914	3.82419	10.3255	2.79441	2.65834	1.69319	0.841951	2.14246
ENSSSCT00000001615	ENSSSCG00000001455	-	7:24901387-24913999	1222	2.57277e-06	1.25328e-11	1.82878e-06	3.27261e-06	0.0342041	3.7058e-06	0.0650305	0.0365678	0.0361912	2.39795e-05	0.161677	2.83552e-06
ENSSSCT00000001616	ENSSSCG00000001456	-	7:24953535-24959390	1265	1.03473	0.851501	2.30962	3.3964	7.22999	6.64686	28.5346	8.48758	8.529	2.38487	3.27076	4.04386
ENSSSCT00000001617	ENSSSCG00000001457	SLA-DQB1	7:24969033-24977270	1226	1.29045	1.35203	3.58111	6.26231	13.9519	9.88838	26.0353	10.7604	11.5324	2.66549	4.11171	5.62296
ENSSSCT00000001618	ENSSSCG00000031336	-	7:24845943-24856905	1170	3.39133e-79	0	5.07231e-54	1.10169e-18	1.16076e-14	8.74927e-09	3.02114e-05	1.14792e-17	3.09529e-26	4.216e-30	6.18718e-33	1.14717e-13
ENSSSCT00000001619	ENSSSCG00000001459	HLA-DOB	7:25029181-25037892	3117	0.00742611	9.24494e-06	0.0194148	0.00735975	7.16098e-22	0.0396539	0.127974	0.0607168	0.0738258	1.22753e-14	0.012288	5.05152e-17
ENSSSCT00000001620	ENSSSCG00000025593	-	7:25045556-25056863	2617	0.779786	0.35649	1.49869	1.78786	2.45978	2.31656	3.04036	1.02572	2.44214	0.485919	0.787321	2.39999
ENSSSCT00000001622	ENSSSCG00000026951	PSMB8	7:25058462-25061488	961	0.407402	0.286722	0.594053	2.17841	3.44917	2.48499	3.3135	1.05468	2.44357	0.789877	0.644492	2.29174
ENSSSCT00000001623	ENSSSCG00000026951	PSMB8	7:25057724-25061533	1810	0.0251064	0.0378866	0.245187	1.39271	1.71327	2.10798	1.38528	0.493539	0.90038	0.335879	0.201958	1.21456
ENSSSCT00000001625	ENSSSCG00000001463	PSMB9	7:25071711-25077233	1331	0.270546	0.0615421	0.605724	0.904147	1.42241	1.88294	3.54632	1.04607	2.73382	0.515945	0.352668	1.33259
ENSSSCT00000001627	ENSSSCG00000001455	-	7:24868655-24914037	1014	0.166772	0.0516729	0.419612	0.859527	1.15881	1.18804	2.08458	0.887797	1.18232	0.567705	0.390996	0.794983
ENSSSCT00000001628	ENSSSCG00000001459	HLA-DOB	7:24984833-25037892	771	0	0.0636628	0.111975	0.224333	7.80369e-06	0.0966677	0.569673	0.0735705	3.2783e-06	0.0382366	0.157463	3.48455e-06
ENSSSCT00000001629	ENSSSCG00000025593	-	7:25045173-25056292	2932	0.0436714	0.0546685	0.114014	0.370743	0.569099	0.449719	0.426346	0.22729	0.35018	0.134376	0.160897	0.454544
ENSSSCT00000001630	ENSSSCG00000025618	TAP1	7:25062770-25072038	2922	0.472269	0.339372	1.44036	2.88262	5.25843	3.45169	6.87909	2.1051	4.83817	1.2256	0.990298	3.15902
ENSSSCT00000001632	ENSSSCG00000001463	PSMB9	7:25072382-25077233	528	0.0614817	8.76488e-06	7.15276e-05	2.63418e-06	0.415712	0.217426	0.837647	1.89835e-05	0.138701	0.263392	0.381925	0.197243
ENSSSCT00000001633	ENSSSCG00000001469	SLA-DMB	7:25119277-25125106	1398	0.490665	0.334746	1.63181	2.85756	4.94884	3.83765	9.58455	2.16668	3.7028	0.929946	1.1793	3.04182
ENSSSCT00000001634	ENSSSCG00000001470	SLA-DMA	7:25133493-25137963	1098	0.228542	0.134426	0.720696	0.705984	1.15207	1.23211	1.82364	0.500793	1.04246	0.364171	0.907939	1.47501
ENSSSCT00000001637	ENSSSCG00000001471	BRD2	7:25150657-25162591	4707	4.84632	4.00413	9.0771	10.3159	9.14011	7.55621	8.47868	6.06952	7.58234	2.04686	2.94371	3.42464
ENSSSCT00000001638	ENSSSCG00000001472	SLA-DOA	7:25178085-25182954	3002	0.0314368	0.0126855	0.0557362	0.13914	0.187884	0.264115	0.853714	0.207702	0.181504	0.0126715	0.0812388	0.194241
ENSSSCT00000001640	ENSSSCG00000001473	COL11A2	7:25203599-25234702	6940	1.43703e-06	1.29919e-06	9.82481e-07	1.31611e-06	9.57657e-07	0.0251015	0.0402103	0.00787158	5.23937e-05	1.06513e-07	0.00259601	8.92021e-15
ENSSSCT00000001642	ENSSSCG00000001474	RXRB	7:25236124-25243176	3127	0.723062	0.479518	1.75625	2.39642	2.53145	2.35023	1.47534	0.927453	1.43333	0.226476	0.60504	0.654173
ENSSSCT00000001644	ENSSSCG00000001475	SLC39A7	7:25242603-25247404	2803	1.90607	1.19641	3.09065	4.94677	3.97542	4.98273	1.46746	1.31789	1.48044	0.732874	1.43598	1.20109
ENSSSCT00000001647	ENSSSCG00000001476	HSD17B8	7:25247612-25249786	984	3.38095	2.26002	10.7907	20.2115	22.3701	23.5745	10.0606	5.83652	5.00461	1.51577	2.41947	2.80713
ENSSSCT00000001648	ENSSSCG00000001477	RING1	7:25251819-25256223	2236	1.42453	0.952843	2.84005	2.90352	2.95558	2.42758	1.99061	1.38195	1.72468	0.370581	1.09088	0.783374
ENSSSCT00000001649	ENSSSCG00000001478	BMP5	7:25345435-25468313	1170	0.32849	0.267825	1.94784	1.79991	0.431149	2.09948	0.905169	0.344548	0.866187	0.151817	0.503781	0.414911
ENSSSCT00000001650	ENSSSCG00000001479	HMGCLL1	7:25596715-25735630	3591	0.0385327	0.0314673	0.0312161	0.271028	0.301294	0.120195	0.0851818	0.0152801	0.0263191	0.0104976	0.00752826	0.00519191
ENSSSCT00000001651	ENSSSCG00000001480	GFRAL	7:25751184-25802232	1197	0	0.0173696	0	5.01733e-06	0.033687	0.0170982	0	0	0.0168012	0	0	6.99853e-07
ENSSSCT00000001653	ENSSSCG00000001481	HCRTR2	7:25830272-25930002	2281	0	0	0	0.00812427	0.00814319	0	0	0	0	0	0	0
ENSSSCT00000001655	ENSSSCG00000001483	FAM83B	7:26058143-26141831	7334	0	0	0	0.00238701	0.0071683	0	0	0	0	0	0	0.00248513
ENSSSCT00000001656	ENSSSCG00000001484	TINAG	7:26448758-26522355	1792	0.0218955	0	0	0	0.0212343	0	0.011062	0	0	0	0.0108975	0
ENSSSCT00000001657	ENSSSCG00000001485	MLIP	7:26599358-26700024	2796	0.127155	4.91613e-05	0.0774897	0.0153638	0.0310999	0.0199299	0.0110071	3.56572e-11	5.56285e-07	1.49318e-32	0.0184268	0.0689345
ENSSSCT00000001658	ENSSSCG00000001486	LRRC1	7:26860139-26989670	3135	0.0540567	0.0787705	0.272074	0.254205	0.35884	0.316725	0.33217	0.162305	0.155998	0.0121055	0.0417848	0.0478899
ENSSSCT00000001659	ENSSSCG00000001487	KLHL31	7:27062043-27106117	6709	16.7988	10.6487	36.4305	23.2306	44.3611	60.8556	74.5317	74.6472	66.6973	13.6459	22.893	21.8285
ENSSSCT00000001660	ENSSSCG00000001488	GCLC	7:27209564-27253530	3999	0.000329032	7.5333e-06	0.452797	0.23449	0.305899	0.53389	0.104692	0.13173	0.0595668	1.04313e-06	0.102968	0.125817
ENSSSCT00000001661	ENSSSCG00000001489	-	13:167750571-167750909	297	0	0	0	0	0.145381	0	0	0	0	0.0644524	0	0.124759
ENSSSCT00000001662	ENSSSCG00000001490	KHDRBS2	7:27389873-27895584	1208	4.63566e-08	7.94564e-05	0.0393532	0.182454	1.0876e-06	0.0675898	2.54629e-08	0.000252912	0.599186	0	3.36924e-20	0.220048
ENSSSCT00000001665	ENSSSCG00000001493	PRIM2	7:28274626-28549687	1875	0.065264	0.00013662	0.536528	0.345285	0.417474	0.130554	0.34672	0.141577	0.00137881	1.84584e-05	0.158856	0.0324032
ENSSSCT00000001669	ENSSSCG00000001497	ZNF451	7:28680548-28765600	7051	0.0673858	0.0921219	0.287161	1.04076	0.74171	0.557546	0.297867	0.376274	0.376343	0.0663353	0.118697	0.0711935
ENSSSCT00000001670	ENSSSCG00000001498	BEND6	7:28769896-28811943	2459	0.0794857	0.0238629	0.100807	0.53112	0.528623	0.171189	0.168341	0.0684937	0.0938854	0.00783081	0.0646905	4.41741e-07
ENSSSCT00000001671	ENSSSCG00000001499	DST	7:28920671-29299171	22797	5.17839	5.886	9.02749	6.14191	6.48499	11.2241	6.9428	16.4905	16.7082	4.52156	9.72762	8.27087
ENSSSCT00000001673	ENSSSCG00000001500	-	7:29398379-29494038	2067	0.191149	0.0665419	0.265745	0.242599	0.323019	0.672495	0.140024	0.277284	0.171752	0.000139005	0.0951555	0.10789
ENSSSCT00000001674	ENSSSCG00000001501	VPS52	7:29624231-29638466	2632	1.43272	0.641927	3.15678	2.41227	2.18212	2.3143	2.53485	1.67409	2.53911	0.379237	0.471866	0.768601
ENSSSCT00000001675	ENSSSCG00000001502	RPS18	7:29638832-29642912	544	120.942	110.777	606.502	542.95	409.926	446.255	349.688	124.465	227.296	40.1324	62.2352	65.0467
ENSSSCT00000001676	ENSSSCG00000001503	B3GALT4	7:29643176-29644845	1562	0.802847	0.295616	1.02236	2.0496	2.13068	1.49546	1.44479	0.692465	1.10003	0.218166	0.26655	0.240851
ENSSSCT00000001677	ENSSSCG00000001504	WDR46	7:29645128-29657397	4881	0.347764	0.172864	1.07553	1.0658	0.805861	1.26461	1.01861	0.653785	0.852215	0.0996331	0.15963	0.319099
ENSSSCT00000001678	ENSSSCG00000001505	-	7:29653671-29655103	751	2.47492	2.0207	10.6594	11.1369	9.65201	12.0252	9.2682	7.02386	10.4227	1.11655	2.36671	2.47301
ENSSSCT00000001679	ENSSSCG00000001506	RGL2	7:29655746-29662710	2759	1.88947	1.40439	5.64191	6.93518	7.33869	7.24945	6.50674	2.77662	3.86276	0.676691	1.41837	1.13671
ENSSSCT00000001680	ENSSSCG00000001507	TAPBP	7:29663494-29672681	1857	0.29554	0.278687	0.748536	0.522399	0.70922	0.879654	1.53162	0.394299	1.08198	0.317705	0.52402	0.83133
ENSSSCT00000001682	ENSSSCG00000001509	DAXX	7:29676857-29681110	2687	2.01804e-05	2.06444e-05	2.02527e-05	6.08513e-05	1.75299e-05	1.57605e-05	3.76691e-05	2.04811e-05	1.94901e-05	8.75774e-05	4.40307e-05	1.96598e-05
ENSSSCT00000001683	ENSSSCG00000001510	KIFC1	7:29694767-29759744	2350	0.0734268	2.5027e-06	0.0651996	0.412388	0.264192	1.15893	0.653131	0.175455	0.121026	0.0670094	0.185702	0.0958724
ENSSSCT00000001684	ENSSSCG00000001511	PHF1	7:29715108-29722010	4559	0.163185	0.136096	0.312164	0.486467	0.42666	0.388453	0.293591	0.259355	0.402114	0.0571803	0.165987	0.100648
ENSSSCT00000001685	ENSSSCG00000001512	CUTA	7:29720092-29722010	1073	3.64985	2.48573	8.43605	9.41729	8.83312	9.92977	8.2112	5.74497	7.3384	1.56261	3.12212	2.66538
ENSSSCT00000001686	ENSSSCG00000001513	SYNGAP1	7:29723787-29752217	3972	0.269766	0.14918	0.000146305	0.178099	0.101662	0.13043	4.28227e-05	0.063474	0.119505	0.0164526	0.0816959	9.39357e-06
ENSSSCT00000001689	ENSSSCG00000001516	BAK1	7:29807010-29815191	3888	0.496588	0.53586	1.84646	0.962511	1.30029	1.16236	1.59043	0.593947	0.926574	0.150865	0.470374	0.476146
ENSSSCT00000001690	ENSSSCG00000001517	-	7:29816541-29819414	963	0.400425	0.157002	1.2329	1.56791	1.0291	1.10118	0.591079	0.180462	0.796804	0.0447616	0.0666784	0.0882722
ENSSSCT00000001691	ENSSSCG00000001518	ITPR3	7:29835868-29902160	10218	0.257608	0.20614	0.425355	1.1977	0.931396	0.622522	0.512358	0.326067	0.520295	0.0967106	0.158691	0.18969
ENSSSCT00000001693	ENSSSCG00000001520	LEMD2	7:29984174-29997101	1468	0.17225	7.09051e-05	0.00018011	0.32443	2.26992	1.33539	0.265976	0.502738	1.99077e-05	0.201197	0.0694611	0.117889
ENSSSCT00000001694	ENSSSCG00000001521	MLN	7:30003290-30013128	843	0	0	0	0	0	0	0.0268315	0	0	0	0	0
ENSSSCT00000001696	ENSSSCG00000001523	GRM4	7:30179304-30267735	3453	0.0379844	0.0218972	0.101477	0.0365141	0.0313498	0.0370614	0.261751	0.151993	0.281672	0.0710919	0.226458	0.151455
ENSSSCT00000001702	ENSSSCG00000001527	C6orf106	7:30564852-30666956	650	1.69557	2.36936	4.53616	7.66609	8.08702	7.84346	8.44748	7.41583	5.95898	1.37217	2.9071	2.34844
ENSSSCT00000001703	ENSSSCG00000001528	RPS10	7:30435145-30442712	1406	34.2121	29.6157	124.904	161.207	143.402	156.142	146.445	63.8271	74.4223	16.4874	26.7204	28.2279
ENSSSCT00000001706	ENSSSCG00000001531	-	7:30708301-30723475	777	5.71812	4.75194	19.3073	16.5164	19.7195	17.3188	19.5506	8.09376	13.1729	2.25012	4.14211	4.98717
ENSSSCT00000001707	ENSSSCG00000001532	UHRF1BP1	7:30731578-30958640	5718	0.33633	0.0350073	0.732394	0.429952	0.499668	0.157348	0.220387	0.183778	0.000123334	0.137801	0.155869	0.207034
ENSSSCT00000001708	ENSSSCG00000001533	TAF11	7:30799964-30812120	1818	0.991424	0.902169	2.89825	3.51115	5.68403	3.39086	6.78271	3.51867	3.15928	0.542719	1.22282	0.976028
ENSSSCT00000001709	ENSSSCG00000001534	ANKS1A	7:30813090-30993205	3558	0.00708386	0.000144571	0.166209	3.95528e-26	0.0482135	9.87434e-152	3.42123e-52	6.82938e-186	0.0457225	1.80192e-05	0.000110949	0.0292227
ENSSSCT00000001710	ENSSSCG00000001535	TCP11	7:31007464-31034067	3094	0	0	0.00596087	0.00582354	0.00583287	0	0.00608872	0	0	0.00610325	0	0
ENSSSCT00000001711	ENSSSCG00000001536	SCUBE3	7:31128476-31150000	4120	0.0769679	0.0185666	0.114844	0.0514303	0.0588624	0.0307388	0.0694751	0.0712954	0.0702887	0.0452612	0.00818722	0.0371085
ENSSSCT00000001712	ENSSSCG00000001537	ZNF76	7:31160647-31191574	2539	0.282214	0.202892	0.621528	0.850356	0.746619	0.986006	0.724721	0.452525	0.546277	0.142684	0.314182	0.317704
ENSSSCT00000001713	ENSSSCG00000001538	DEF6	7:31161363-31216414	6648	0.0584674	0.0280885	0.0281685	0.0833401	0.187651	0.112438	0.05004	0.0359919	0.0531275	1.01966e-14	0.0179477	0.0587403
ENSSSCT00000001714	ENSSSCG00000001539	PPARD	7:31222531-31295210	3455	1.79888	0.981352	1.34015	0.788641	0.827861	0.41468	0.723708	0.40483	0.581883	0.449888	0.466447	0.611117
ENSSSCT00000001720	ENSSSCG00000001543	-	7:31328387-31330589	533	24.7784	21.9021	161.175	67.8594	59.6611	86.8208	47.1703	22.8327	48.024	9.68764	11.0769	13.4277
ENSSSCT00000001722	ENSSSCG00000001544	TEAD3	7:31337889-31351452	1307	1.90026	1.5865	2.5826	1.8619	1.61088	1.83543	0.790578	0.47128	1.31888	0.501794	0.652186	0.665689
ENSSSCT00000001724	ENSSSCG00000001546	-	7:31313147-31326141	1859	0.277784	0.127062	0.635871	0.502177	0.702276	0.67144	0.475528	0.369054	0.163341	0.0964266	0.144285	0.0715382
ENSSSCT00000001727	ENSSSCG00000001549	FKBP5	7:31443340-31550604	1793	6.80514	5.32816	3.82519	5.00395	3.51399	2.01068	0.754756	0.586397	0.364219	0.755498	1.24412	0.820698
ENSSSCT00000001728	ENSSSCG00000001550	ARMC12	7:31592084-31601773	1044	0.606247	0.529776	1.51081	0.197381	0.119021	0.181329	0.0206093	0.0409156	0.0989035	0	0.0807075	0.0802339
ENSSSCT00000001729	ENSSSCG00000001551	-	7:31605420-31606528	412	0.0708044	0	0	0	0	0	0	0	0	0	0	0
ENSSSCT00000001732	ENSSSCG00000001554	SRPK1	7:31648014-31685166	1941	0.593529	0.387743	1.29421	1.14159	1.80439	1.56937	1.40703	0.941364	1.57669	0.271645	0.514325	0.274384
ENSSSCT00000001733	ENSSSCG00000001555	SLC26A8	7:31722890-31779819	2988	0	0	4.74844e-07	3.95111e-07	0	0	4.36041e-07	0	4.34357e-07	0	0	0
ENSSSCT00000001734	ENSSSCG00000001556	MAPK14	7:31791593-31862031	4313	4.15966	2.88979	11.9143	7.93917	11.5684	9.81459	12.1936	9.38725	11.4518	2.1027	3.29664	3.09483
ENSSSCT00000001738	ENSSSCG00000001559	PNPLA1	7:31988395-32025245	1401	0	0	0.0428373	0	0	0	0	0	0	0	0.0143468	0
ENSSSCT00000001739	ENSSSCG00000001560	C6orf222	7:32035346-32054632	3310	0	0	0	0	0	0	8.32539e-69	0	0	0	0	0
ENSSSCT00000001740	ENSSSCG00000001561	ETV7	7:32089699-32108185	1375	0	0	0.0325888	0.0642734	0.136308	0.048626	0.156254	0.0415109	0.153773	0.0758023	0.0738357	0.0108889
ENSSSCT00000001741	ENSSSCG00000001562	KCTD20	7:32146112-32192508	1956	0.427248	0.216502	0.935551	1.59801	1.91527	1.55473	1.40941	0.711101	0.686829	0.198284	0.230026	0.440592
ENSSSCT00000001742	ENSSSCG00000001563	STK38	7:32206535-32253679	3619	0.808602	0.615461	2.27848	4.0917	3.25543	3.27596	3.32698	2.41547	2.36199	0.656146	1.08156	0.725187
ENSSSCT00000001743	ENSSSCG00000001564	SRSF3	7:32289459-32302716	2575	2.10868	1.89579	7.40409	10.2565	7.72817	7.60896	9.17836	5.58222	7.94923	1.31208	2.26582	2.15976
ENSSSCT00000001744	ENSSSCG00000001565	CDKN1A	7:32359454-32362271	474	12.3366	13.9685	28.9664	37.6657	29.246	23.4513	11.6742	9.96136	27.1221	3.07778	8.10019	7.70621
ENSSSCT00000001745	ENSSSCG00000001566	RAB44	7:32372458-32401798	3229	0.00582236	5.15592e-05	5.05188e-05	0.0111986	0	0	4.92631e-05	0	4.743e-05	0	0	5.03148e-05
ENSSSCT00000001746	ENSSSCG00000001567	CPNE5	7:32398572-32508111	2097	3.28359e-09	0	0.027326	0.0260448	0	0.0542996	0.0186097	0.0277679	0.00500037	5.10113e-29	0.00917688	4.19754e-20
ENSSSCT00000001749	ENSSSCG00000001570	PI16	7:32600964-32610739	1385	1.32718	0.853093	2.3438	2.50607	2.97014	8.47952	11.5957	5.92312	4.69266	1.82086	3.43028	4.03094
ENSSSCT00000001750	ENSSSCG00000001571	-	7:32617425-32635580	1995	8.02335	4.89116	14.6596	10.4473	9.72989	8.58969	6.0633	3.5481	4.54463	1.73612	3.43952	3.47049
ENSSSCT00000001751	ENSSSCG00000001572	FGD2	7:32648268-32674541	2434	0.081059	3.79111e-07	0.0732244	0.515266	0.791738	0.297445	0.610509	0.418137	0.701389	0.140733	0.146552	0.465333
ENSSSCT00000001752	ENSSSCG00000001573	PIM1	7:32788004-32793881	2995	0.825677	1.81214	3.2221	1.47976	1.26985	1.27461	3.87978	1.19883	0.964364	0.660546	0.758017	0.628129
ENSSSCT00000001755	ENSSSCG00000001576	TMEM217	7:32825267-32825846	579	0	0	0	0	0	0	0	0	0	0	0	0.0420307
ENSSSCT00000001756	ENSSSCG00000001577	TBC1D22B	7:32839172-32914495	3558	0.163985	0.175736	0.582864	0.424955	0.429815	0.545223	0.283049	0.31865	0.279235	0.126665	0.284621	0.292497
ENSSSCT00000001757	ENSSSCG00000001578	RNF8	7:32931854-32969533	1933	0.108079	0.139861	0.526882	1.16602	1.11802	1.35425	1.06622	0.748499	1.12565	0.122844	0.35327	0.440194
ENSSSCT00000001758	ENSSSCG00000001579	CMTR1	7:33000552-33063383	3185	0.69703	0.375426	1.87289	2.14185	2.27085	1.89751	2.04897	1.04042	1.80673	0.380976	0.534207	0.783034
ENSSSCT00000001762	ENSSSCG00000001582	MDGA1	7:33205703-33268272	7578	0.036135	0.0243055	0.0662194	0.062324	0.0600755	0.0865893	0.0868932	0.0384652	0.0669094	0.0291421	0.0167393	0.0408586
ENSSSCT00000001768	ENSSSCG00000001588	DNAH8	7:34198166-34479492	14076	4.21612e-06	0.012952	0.0314867	0.0380986	0.0338748	0.0635176	0.0179576	0.0332889	0.0417574	4.05055e-06	0.00891866	3.97624e-06
ENSSSCT00000001769	ENSSSCG00000001589	GLP1R	7:34497758-34534612	1688	0.035079	0.0235874	0.0925661	0.0678973	0.113509	0.0230263	0.0472961	0.0235125	0.0792839	0	0	0.0232696
ENSSSCT00000001774	ENSSSCG00000001594	-	7:34918892-35018856	1212	0.0339641	0	0	0	0.0165995	0	0	0	0	0.0170942	0	0.0168719
ENSSSCT00000001775	ENSSSCG00000001595	DAAM2	7:35159048-35283324	3882	1.19978	0.832716	2.19717	2.13976	1.72749	1.62863	2.2951	1.52618	1.67395	0.382242	0.834619	1.04824
ENSSSCT00000001776	ENSSSCG00000001596	-	7:35286576-35320931	2797	0.162626	0.116206	0.347208	0.450101	0.379088	0.748551	0.852332	1.43182	1.41577	0.273116	0.484989	0.526651
ENSSSCT00000001777	ENSSSCG00000001597	LRFN2	7:35724105-35915032	3221	0	0	0.0459814	0.0505267	0.0168718	0.00569911	0	0.0116833	0.0112285	0	0.0116025	0.00581836
ENSSSCT00000001780	ENSSSCG00000001611	NFYA	7:36387611-36409490	4411	0.147118	0.113959	0.328816	0.383285	0.247273	0.439331	0.370888	0.196819	0.282661	0.00487748	0.0709516	0.144377
ENSSSCT00000001790	ENSSSCG00000023366	OARD1	7:36379545-36385771	2395	0.0102603	5.90688e-09	0.00603191	0.0216729	0.0374605	0.0188038	0.0129782	0.0116077	0.0268796	0.0148465	3.4421e-08	4.13369e-08
ENSSSCT00000001791	ENSSSCG00000001611	NFYA	7:36386631-36409479	3894	0.588569	0.41186	0.717037	0.0926521	0.430635	0.496442	0.533652	0.18136	0.297162	0.207854	0.252047	0.309444
ENSSSCT00000001792	ENSSSCG00000001612	-	7:36430572-36453132	5713	0.00845136	0.0163675	0.0108093	0.0134033	0.0280834	0.0230848	0.00650486	0.00908617	0.0223319	0.0085913	0.00613572	0.00521953
ENSSSCT00000001793	ENSSSCG00000001613	TREML1	7:36455602-36460715	1255	0	0	0	0	0.0478017	0	0.0165744	0	0	0	0	0
ENSSSCT00000001800	ENSSSCG00000001619	FOXP4	7:36741882-36791064	2864	0.3238	0.216246	0.338556	0.523095	0.331376	0.277715	0.206105	0.0661664	0.235364	0.0932196	0.131374	0.17779
ENSSSCT00000001801	ENSSSCG00000001620	MDFI	7:36830392-36847455	2265	0.0593977	8.53262e-05	0.226128	0.24597	0.152345	0.349391	0.205322	0.0765999	7.93496e-05	8.98137e-05	8.2699e-07	8.41735e-05
ENSSSCT00000001802	ENSSSCG00000001621	TFEB	7:36870241-36920842	2334	3.00216	1.39989	4.38566	4.94409	5.22142	4.05117	3.11574	2.6562	3.75728	0.912407	1.50109	1.94641
ENSSSCT00000001804	ENSSSCG00000034190	-	7:36969448-36976182	1386	0.015549	0.0170171	0.146929	0.0514407	0.0850826	0.141389	0.20409	0.0650824	0.0455088	5.17328e-60	0.0154051	0.0348418
ENSSSCT00000001806	ENSSSCG00000001624	FRS3	7:36959467-36967529	2077	0.242337	0.103419	0.340566	0.323904	0.324723	0.35668	0.329101	0.112239	0.279068	0.112674	0.102005	0.0835256
ENSSSCT00000001807	ENSSSCG00000001625	PGC	7:36922270-36951349	1587	0	0	0	0	0	2.0877e-07	0.0506674	1.86562e-07	0	0.0125939	0.0249392	1.80388e-07
ENSSSCT00000001808	ENSSSCG00000001621	TFEB	7:36870863-36921057	1825	0.853607	0.652598	1.54118	1.07829	1.07166	0.000306164	0.808647	0.955155	0.826889	0.0517308	0.172185	0.700001
ENSSSCT00000001810	ENSSSCG00000034190	-	7:36970280-36978281	2648	2.20222	1.4034	5.56944	2.93893	4.37822	3.15193	4.89603	3.23488	4.36773	0.802746	1.22857	1.93994
ENSSSCT00000001812	ENSSSCG00000001629	USP49	7:36984363-36994759	2049	0.160799	0.162197	0.392364	0.228301	0.311284	0.241359	0.238589	0.085436	0.219291	0.114342	0.09411	0.113013
ENSSSCT00000001816	ENSSSCG00000001633	-	7:37281045-37281420	375	0	0	0	0	0	0.0908521	0	0	0	0	0	0
ENSSSCT00000001820	ENSSSCG00000001636	GUCA1A	7:37282699-37296717	1775	0	0	0.0109367	0.0427929	0	0	0	0.011113	0	0	0.0110082	0.011005
ENSSSCT00000001821	ENSSSCG00000001637	GUCA1B	7:37299019-37310170	591	0.0414317	0	0.0420722	0.207114	0.209189	0.255862	0	0	0	0.0416021	0	0.0817504
ENSSSCT00000001822	ENSSSCG00000001638	MRPS10	7:37317991-37329187	1778	1.49076	1.54819	5.94113	6.84551	8.26855	5.7463	6.39424	3.62861	4.73473	0.522751	1.01132	0.791268
ENSSSCT00000001823	ENSSSCG00000001639	TRERF1	7:37333951-37380195	6740	3.44651e-24	0.0381538	0.0704514	0.00372144	0.0477373	0.0135718	3.22007e-22	0.0432084	2.62119e-35	0.00924318	0.0596346	0.00388581
ENSSSCT00000001825	ENSSSCG00000001641	UBR2	7:37655732-37782870	5617	0.293966	0.162406	1.38854	2.40313	2.20997	1.31872	0.868567	0.681477	0.10833	0.515228	0.598956	0.284584
ENSSSCT00000001826	ENSSSCG00000026741	TBCC	7:37822763-37823994	1231	2.50213	2.01858	7.2941	7.01162	7.07361	7.32931	7.23848	4.42859	8.45366	1.17541	1.78003	2.13806
ENSSSCT00000001830	ENSSSCG00000001646	BICRAL	7:37881950-37933661	6413	0.820003	0.804429	0.674478	0.110672	0.32355	0.00365578	0.00022921	0.362322	0.55849	0.287193	0.312518	0.477379
ENSSSCT00000001836	ENSSSCG00000001651	CNPY3	7:38014750-38026454	3941	0.38281	0.205021	1.06614	0.810337	0.937498	0.8453	0.892269	0.562291	0.621858	0.152422	0.38029	0.426436
ENSSSCT00000001838	ENSSSCG00000001653	PEX6	7:38039861-38052369	3623	0.386345	0.160044	0.660203	0.714527	0.907304	0.764469	0.591541	0.249493	0.469178	0.0494943	0.153206	0.196359
ENSSSCT00000001840	ENSSSCG00000001654	PPP2R5D	7:38055573-38079867	4581	6.93844e-09	2.62796e-12	0.04328	9.24541e-06	4.02513e-06	0.020901	0.00926111	2.56122e-13	0.00222604	1.55267e-06	0.0313768	0.0157955
ENSSSCT00000001841	ENSSSCG00000001655	-	7:38077891-38080229	1319	2.2222	1.56259	3.50444	3.59582	4.27269	3.81662	2.95473	1.59577	2.46861	0.511509	1.49589	1.31232
ENSSSCT00000001845	ENSSSCG00000022901	KLHDC3	7:38080041-38086605	2143	0.0208872	0.0209728	0.0418458	0.289283	0.259028	0.327909	0.0795705	1.55739e-17	0.0271657	5.22522e-36	0.0205453	5.71536e-22
ENSSSCT00000001846	ENSSSCG00000001656	RRP36	7:38087257-38094548	3023	1.08598	0.579253	3.04904	2.26384	2.05746	2.19484	2.61129	1.5744	1.96978	0.402517	0.800215	0.572238
ENSSSCT00000001847	ENSSSCG00000001657	CUL7	7:38097854-38115471	5208	0.342752	0.310859	0.715397	1.18465	0.771769	0.783903	0.619228	0.349779	0.181398	0.104582	0.195395	0.305887
ENSSSCT00000001849	ENSSSCG00000001658	MRPL2	7:38116176-38120862	1074	5.75772	3.93217	24.021	14.3153	15.5373	17.7526	13.0405	7.82409	9.05452	1.63919	3.23679	3.37015
ENSSSCT00000001850	ENSSSCG00000001659	KLC4	7:38120788-38134532	2631	0.00250041	0.512304	1.77493	1.08994	1.014	1.66056	1.58027	0.70817	0.727912	0.084369	0.308184	0.000335104
ENSSSCT00000001851	ENSSSCG00000001660	PTK7	7:38135876-38208138	6541	0.482179	0.31599	1.13507	1.36603	1.48444	1.80712	0.482807	0.21526	0.193205	0.107273	0.166816	0.147453
ENSSSCT00000001852	ENSSSCG00000001661	SRF	7:38213062-38223384	4167	4.26329	2.18206	9.75813	5.02333	4.98772	5.63122	6.55472	7.55134	7.78419	2.60242	4.46521	4.00639
ENSSSCT00000001854	ENSSSCG00000026568	DNPH1	7:38263499-38266688	902	0.433329	0.266974	3.68394	1.01536	0.76007	1.08628	1.40489	0.635641	1.34963	0.193723	0.288803	0.190951
ENSSSCT00000001855	ENSSSCG00000001664	TTBK1	7:38276277-38316610	4220	3.63661e-06	0	0	0	3.19125e-06	0	0	3.85992e-06	3.69381e-06	0.0177441	0	0
ENSSSCT00000001859	ENSSSCG00000001667	ZNF318	7:38359504-38389113	7538	0.956713	0.642701	1.5337	1.97272	1.63086	1.71297	1.37358	2.09807	2.5355	0.576233	0.771783	0.72494
ENSSSCT00000001869	ENSSSCG00000001688	TJAP1	7:38487847-38501526	3301	0.368795	0.453279	1.02783	0.7635	1.3286	0.635549	0.415324	0.358018	0.484643	0.14709	0.31281	0.344545
ENSSSCT00000001870	ENSSSCG00000001676	LRRC73	7:38501969-38504718	1204	0.0171122	0	0.0349722	0.201128	0.0673981	0.0173173	0	0.0345603	0	0	0	2.06027e-109
ENSSSCT00000001874	ENSSSCG00000001679	XPO5	7:38532877-38569373	3573	1.67866	0.783739	3.53837	5.16491	3.51064	3.89746	2.92901	1.80746	4.14479	0.473198	1.51162	1.216
ENSSSCT00000001875	ENSSSCG00000001680	ABCC10	7:38432731-38452686	4934	0.169156	0.101403	0.278082	0.314502	0.166653	0.200032	0.269423	0.316675	0.254824	9.23152e-14	0.126247	4.13572e-07
ENSSSCT00000001877	ENSSSCG00000001682	DLK2	7:38452802-38458230	2060	0.0365741	1.65125e-05	0.0179026	0.0544699	2.36565e-06	0.101512	1.91134e-05	0.00943753	0.0272493	0.0189451	0.0467798	4.6849e-06
ENSSSCT00000001878	ENSSSCG00000001682	DLK2	7:38452802-38458230	2520	0.0386954	0.0305372	0.0378692	1.48575e-06	0.0219298	1.47711e-06	0.0304841	0	1.30126e-06	1.42809e-06	1.60015e-06	0.0754221
ENSSSCT00000001879	ENSSSCG00000001683	POLH	7:38569819-38601648	3253	6.14551e-07	7.42569e-06	0.0601794	7.02181e-05	2.94026e-05	1.94019e-05	0.309807	0.351567	0.114284	0.00473933	0.0825638	0.098867
ENSSSCT00000001884	ENSSSCG00000001688	TJAP1	7:38486619-38501526	2712	0.354915	0.156309	0.762257	1.02453	0.662874	0.881422	0.785225	0.423348	0.481701	0.0876103	0.203027	0.23052
ENSSSCT00000001886	ENSSSCG00000001689	GTPBP2	7:38604592-38614715	1818	3.51058e-06	8.26799e-06	9.36414e-06	0.0779552	0.136017	0.0995616	2.06005e-06	0.0974102	1.01365e-05	2.21478e-05	3.3295e-05	1.08011e-05
ENSSSCT00000001888	ENSSSCG00000001691	RSPH9	7:38625854-38642422	1910	0.0714695	0.0617904	0.141265	0.0690563	0.158274	0	0.0721639	0	0.0296154	0.0308533	0.071126	0.101635
ENSSSCT00000001889	ENSSSCG00000001692	MRPS18A	7:38641029-38657080	1571	3.63409	2.09443	8.9037	9.3721	13.0581	9.31399	7.62588	4.91795	5.84519	1.03288	2.25747	2.61993
ENSSSCT00000001892	ENSSSCG00000001695	VEGFA	7:38746054-38762342	3599	7.972	6.74633	17.4733	11.1249	9.98336	10.5909	9.68322	8.03362	11.1679	2.06212	4.1515	2.94118
ENSSSCT00000001895	ENSSSCG00000001696	-	7:39125170-39138419	696	5.39734e-12	1.00113e-07	0.41657	0.720917	3.67468e-05	0.612829	0.0472756	1.34452e-05	2.36374e-05	9.59208e-06	0.137269	4.50911e-48
ENSSSCT00000001896	ENSSSCG00000001697	TMEM63B	7:39138395-39166617	4806	0.053418	0.0696625	4.97079e-06	0.0352421	0.0507443	0.0771057	0.0271218	6.44441e-08	0.0288696	1.45652e-11	0.0348196	0.0231686
ENSSSCT00000001897	ENSSSCG00000001698	CAPN11	7:39171656-39191007	1860	0	0	0.0207795	0.0203171	0	0.0103307	0.0212309	0	0.0101658	0	0	0
ENSSSCT00000001899	ENSSSCG00000001700	SLC29A1	7:39221832-39233116	2112	3.51047	2.46356	7.97964	4.17573	7.0181	6.91983	5.61218	2.42534	1.97457	0.987676	2.00932	1.41045
ENSSSCT00000001901	ENSSSCG00000001701	HSP90AB1	7:39243586-39254002	6395	7.16818e-05	5.09722e-05	4.84868e-05	6.62134e-05	6.12662e-05	5.62382e-05	8.27967e-05	8.74965e-05	6.6819e-05	8.67791e-05	8.2372e-05	8.99059e-05
ENSSSCT00000001902	ENSSSCG00000001702	SLC35B2	7:39249454-39254504	3676	4.8281	4.19405	12.5868	9.14226	7.78227	8.60405	6.00928	3.44097	4.93702	1.21391	2.17122	2.2293
ENSSSCT00000001903	ENSSSCG00000001703	NFKBIE	7:39255074-39263367	2454	0.8568	0.526437	0.722102	1.02089	1.28643	0.945607	1.23965	0.468403	0.683311	0.204045	0.255603	0.457785
ENSSSCT00000001905	ENSSSCG00000001705	TCTE1	7:39276950-39287881	1506	0	0.0131687	0	0	0	0	0	0	0	0	0	0
ENSSSCT00000001906	ENSSSCG00000001706	AARS2	7:39301060-39313704	3356	0.703522	0.297389	1.42588	1.2062	1.71241	1.37388	0.872222	0.559645	1.12773	0.222458	0.277914	0.448611
ENSSSCT00000001908	ENSSSCG00000001708	CDC5L	7:39384391-39430143	5445	1.27133	1.13597	3.60454	9.19777	8.96537	7.64436	4.67625	3.25534	4.44824	0.739588	1.17176	1.14664
ENSSSCT00000001909	ENSSSCG00000001709	SUPT3H	7:39762106-40161128	4191	0.625048	0.456175	0.697515	1.13658	0.861123	1.07976	0.663124	0.323468	0.549037	0.285948	0.378689	0.27847
ENSSSCT00000001910	ENSSSCG00000001710	RUNX2	7:40205911-40349398	1281	3.72712e-77	9.7481e-16	8.88211e-149	2.23011e-61	0.0385326	0	1.07801e-123	0	1.04516e-122	0	0.0092291	8.22088e-10
ENSSSCT00000001913	ENSSSCG00000025788	ENPP4	7:40897039-40909393	1461	0.261921	0.164003	0.499431	0.54282	0.916663	1.34814	0.351035	0.511611	0.636448	0.233629	0.189538	0.509315
ENSSSCT00000001917	ENSSSCG00000001715	ENPP5	7:40920029-40936567	4342	4.14332e-18	0	9.77086e-18	1.55139e-10	0.0164329	1.94412e-15	4.53464e-07	0	3.72965e-06	0	0	1.68556e-29
ENSSSCT00000001918	ENSSSCG00000001716	RCAN2	7:40979765-41090808	3190	6.2191e-05	6.31425e-05	6.02491e-05	5.96893e-05	0.804673	0.981401	0.798635	0.613736	0.183937	0.186517	0.615362	0.332435
ENSSSCT00000001920	ENSSSCG00000001718	CYP39A1	7:41344803-41426023	2438	0.133344	0.216213	0.495553	1.33551	1.18618	1.38553	1.29882	0.366237	0.298423	0.0826081	0.0696397	0.159107
ENSSSCT00000001922	ENSSSCG00000001718	CYP39A1	7:41345550-41426343	1903	1.60982e-07	0.0127943	1.01391e-11	0.0789376	6.31101e-16	0.54294	0.0808571	5.18784e-75	0.0649854	7.46436e-34	0.0134657	8.25483e-16
ENSSSCT00000001923	ENSSSCG00000001720	SLC25A27	7:41426198-41450139	3897	0.0995567	0.184175	0.23483	0.572719	0.419013	0.550972	0.178396	0.294577	0.313192	0.110628	0.0685343	0.100187
ENSSSCT00000001927	ENSSSCG00000001723	PLA2G7	7:41487663-41531345	2164	3.4669e-06	0.256343	0.0206217	1.19039	2.70807	1.71533	0.174744	4.95213e-06	0.123216	0.0872218	0.359349	0.0644487
ENSSSCT00000001928	ENSSSCG00000001724	MEP1A	7:41587748-41625017	3057	0	0	0.00305477	0.0029838	0	0	0	0	0	0	0	0
ENSSSCT00000001929	ENSSSCG00000001725	-	7:41640262-41729027	5901	2.45588	1.76178	4.50843	7.7425	6.88035	8.30275	8.24851	5.2246	4.35319	1.07307	2.11392	1.95916
ENSSSCT00000001930	ENSSSCG00000001726	ADGRF1	7:41803837-41853917	5949	0.000590639	0.000601086	0.000576412	0.000566521	0.000565833	0.000575557	0.000600796	0.000595739	0.000561611	0.000659725	0.0005972	0.000598264
ENSSSCT00000001932	ENSSSCG00000030197	CD2AP	7:42241253-42329462	1926	0.483308	0.309729	1.17162	1.38594	1.44562	1.77345	1.61705	0.863042	1.01667	0.252267	0.509384	0.306503
ENSSSCT00000001933	ENSSSCG00000001729	PTCHD4	7:42572970-42770559	3382	0.0388213	0	0.0327549	0.0213276	0.00534092	0	0.0334438	0.00554847	0.117301	0.00558903	0.0110217	0
ENSSSCT00000001935	ENSSSCG00000001731	CENPQ	7:43624804-43640014	2646	0.0805641	0.0812984	0.353071	1.18053	0.809703	0.728535	0.746648	0.532125	0.599821	0.115462	0.142869	0.0596021
ENSSSCT00000001937	ENSSSCG00000001732	MUT	7:43597894-43620316	2252	0.50162	0.693169	2.06801	5.4791	4.29691	4.89298	5.83463	5.06481	4.61971	0.808495	1.41574	0.824758
ENSSSCT00000001939	ENSSSCG00000001734	-	7:43669510-43674357	1294	0	0.0476634	0.0625772	0.107197	0.0307495	0.0156046	0.143961	0.0317833	0.0153366	0	0	0
ENSSSCT00000001940	ENSSSCG00000001735	RHAG	7:43701205-43719512	1320	0	0	0.0152891	0.0149649	0.0300466	0.0609882	0.0156317	0.0155311	0	0	0	0
ENSSSCT00000001950	ENSSSCG00000001744	TFAP2D	7:44640280-44702561	1359	0	0	0	0	0	0	0	0.01502	0	0	0	0
ENSSSCT00000001952	ENSSSCG00000001746	PKHD1	7:45450935-45925155	12499	2.96702e-05	0.0356779	0.000163065	0.000111074	0.0269025	9.66335e-07	3.19488e-06	3.12915e-07	4.51273e-06	3.25509e-06	2.78427e-06	6.34048e-06
ENSSSCT00000001954	ENSSSCG00000001748	IL17A	7:46013561-46017294	1344	0.0150893	0.0152174	0	0	0	0	0	0	0	0	0	0
ENSSSCT00000001956	ENSSSCG00000001750	PAQR8	7:46104945-46233280	5304	0.0173665	0.00700667	0.095576	0.106637	0.185606	0.202794	0.216027	0.0864366	0.0999411	0.010502	0.0344932	0.021705
ENSSSCT00000001957	ENSSSCG00000001751	CHRNA5	7:47384160-47424836	1444	0.0139135	0.0140323	0.0137942	0.0809904	0.0168887	0.183689	9.52746e-45	0.0140148	0.0135141	0	0	0.0415091
ENSSSCT00000001958	ENSSSCG00000001752	CHRNA3	7:47361771-47382740	3912	0	0	0	1.12218e-10	0.00162721	0.0499053	0.0379409	1.11215e-06	0.0137232	0.00959981	4.38302e-45	0
ENSSSCT00000001959	ENSSSCG00000001753	CHRNB4	7:47339128-47358267	1392	0	0	0	0	0	0	0.0143874	0	0	0	0	0
ENSSSCT00000001961	ENSSSCG00000001755	HYKK	7:47451816-47474694	2419	0.0474578	1.11769e-05	0.0942241	3.87495e-06	0.0957478	0.243152	0.0995822	1.80127e-06	1.10814e-05	7.35418e-08	0.0785012	1.10362e-05
ENSSSCT00000001962	ENSSSCG00000001756	IREB2	7:47481538-47529187	3463	2.58594	2.16126	5.06375	8.18025	8.89704	7.16797	4.60477	3.7071	3.55697	1.09041	1.59652	1.60705
ENSSSCT00000001963	ENSSSCG00000001757	WDR61	7:47641146-47661931	2478	0.655219	0.528765	2.50102	3.68067	3.81521	3.15802	3.73451	1.78457	2.60809	0.333968	0.781845	0.760214
ENSSSCT00000001964	ENSSSCG00000027477	TBC1D2B	7:47839078-47924212	2705	0.0486225	0.348976	0.478235	0.941911	0.981296	0.442214	0.566107	0.167305	0.380605	0.126392	0.251175	0.160989
ENSSSCT00000001965	ENSSSCG00000037646	DNAJA4	7:47659071-47675058	4422	5.13671	4.87654	19.9472	16.3147	8.4506	15.6685	4.96725	4.87392	5.55077	1.07427	3.53314	2.52398
ENSSSCT00000001967	ENSSSCG00000001760	ACSBG1	7:47727092-47758526	2239	1.66637e-09	3.29118e-08	3.11361e-11	4.1969e-06	6.63565e-07	0.0125867	0.0275916	3.95097e-12	7.86058e-09	1.10737e-08	1.13294e-07	2.07233e-08
ENSSSCT00000001968	ENSSSCG00000001760	ACSBG1	7:47705085-47762544	6187	0.130458	0.071794	0.157256	0.190313	0.170752	0.214774	0.0499452	0.109528	0.198912	0.0239103	0.0529874	0.032534
ENSSSCT00000001970	ENSSSCG00000001762	CIB2	7:47788917-47812748	546	0.555092	0.232991	1.74538	1.0229	3.19706	3.21338	3.87512	0.956697	0.561384	0.417826	0.512408	0.546882
ENSSSCT00000001973	ENSSSCG00000001764	SH2D7	7:47812402-47825045	4441	0.0876563	0.0884351	0.262656	0.176315	0.553755	0.390271	0.393817	0.108458	0.144227	0.0589002	0.107793	0.0749226
ENSSSCT00000001974	ENSSSCG00000001765	ADAMTS7	7:47929032-47994484	5464	0.380707	0.200548	0.680251	0.623691	0.446494	0.635829	0.736591	0.248994	0.213213	0.0815048	0.301088	0.17474
ENSSSCT00000001981	ENSSSCG00000001769	MORF4L1	7:48050142-48075794	1906	0.257452	0.396117	1.23402	1.67498	1.38538	1.27171	1.69654	1.76419	1.94632	0.238794	0.25639	0.318261
ENSSSCT00000001983	ENSSSCG00000001770	CTSH	7:48083571-48106074	2737	0.810903	0.708892	2.06368	3.31288	5.673	3.14672	4.10328	1.79306	1.73596	0.523338	0.700315	0.951713
ENSSSCT00000001985	ENSSSCG00000001770	CTSH	7:48085176-48105979	943	0.138047	0.314043	0.980154	3.21289	3.30234	2.25797	2.05305	0.527937	0.560674	0.851379	0.601951	1.0012
ENSSSCT00000001986	ENSSSCG00000001771	RASGRF1	7:48118208-48246288	8256	4.86522e-05	0	0	0	4.57997e-05	0	4.89495e-05	4.95078e-05	4.61614e-05	0	0	4.77448e-05
ENSSSCT00000001988	ENSSSCG00000001773	TMED3	7:48431635-48442611	1751	0.505353	0.453078	2.56601	1.6946	3.33385	3.12712	5.38023	1.63656	0.652303	0.350636	1.2745	1.00581
ENSSSCT00000001990	ENSSSCG00000001775	KIAA1024	7:48500249-48536378	2979	0	0	1.25963e-06	0	0	4.84593e-07	0.00588301	0.0133842	0.00561071	0.0122715	0	0.0173124
ENSSSCT00000001991	ENSSSCG00000001776	-	7:48560860-48562039	1179	0	0	0.0348719	0	0.0342984	0	0	0.01771	0	0	0	0
ENSSSCT00000001994	ENSSSCG00000001779	ZFAND6	7:48978996-49034715	1502	1.89116	2.43145	6.13019	14.3295	14.8452	14.0904	25.2137	16.4367	11.4374	3.57047	4.96775	3.95217
ENSSSCT00000001995	ENSSSCG00000001780	FAH	7:49047982-49087783	1647	0.336429	0.18178	0.784939	2.22175	2.05952	1.18361	1.04523	0.398755	0.617084	0.205713	0.472602	0.609676
ENSSSCT00000001996	ENSSSCG00000040288	ARNT2	7:49259596-49446333	2167	2.13387e-51	0	0.0450715	5.66165e-07	0.0264474	0.00086967	0.0478255	3.03116e-48	0.0105394	0.000596458	0	8.86155e-09
ENSSSCT00000002001	ENSSSCG00000001786	CFAP161	7:49927238-49940764	1844	0.25464	0.0428071	0.115383	0.21538	0.318837	0.333771	0.0428694	0.0319744	0.0102636	0.032061	0	0
ENSSSCT00000002002	ENSSSCG00000001787	IL16	7:49973464-50102059	4991	0.170147	0.0161195	0.0804346	0.353791	0.483274	0.120672	0.373845	0.165168	0.255413	0.0426544	1.80828e-06	0.162305
ENSSSCT00000002003	ENSSSCG00000001788	STARD5	7:50107033-50118629	1212	0.0849103	0.10275	0.101287	0.314052	0.580981	0.387571	0.310738	0.17147	0.14901	0.136754	0.118565	0.118103
ENSSSCT00000002008	ENSSSCG00000001792	EFL1	7:50839702-50977024	3667	1.30438	0.984324	2.47886	4.30415	4.46066	3.18515	2.12171	2.13096	2.9349	0.519265	0.933251	0.721233
ENSSSCT00000002009	ENSSSCG00000001793	ADAMTSL3	7:51008330-51363704	5090	0.29715	0.147864	0.684047	1.9954	1.00011	0.683689	0.260259	0.16143	0.545341	0.0938829	0.243875	0.216498
ENSSSCT00000002011	ENSSSCG00000001795	SH3GL3	7:51381542-51540296	1283	0.0318172	0.108416	1.98911e-06	0.625913	0.325053	0.0910536	0.144309	6.94452e-07	0.000160825	0	0.0634466	1.8576e-07
ENSSSCT00000002014	ENSSSCG00000001798	BNC1	7:51651171-51678211	3012	0	3.9808e-07	0	0.0120564	0	0.00612049	0.00630106	0	0	0	0	0
ENSSSCT00000002016	ENSSSCG00000001800	TM6SF1	7:51816452-51844940	1331	1.00531	0.169615	2.10436	1.54203	0.603077	2.53619	1.67174	1.2794	3.0015	0.352316	0.297152	1.38597
ENSSSCT00000002017	ENSSSCG00000001801	BTBD1	7:51877454-51926239	3563	6.19986	6.61645	15.7891	60.8865	56.7125	63.1376	45.5893	39.4016	36.2751	7.13354	8.46193	8.99774
ENSSSCT00000002020	ENSSSCG00000001804	HOMER2	7:52055117-52095361	1824	3.47019	4.87022	15.2032	21.7273	9.81031	21.1775	8.73655	7.34698	4.33928	1.69585	4.2584	1.80797
ENSSSCT00000002021	ENSSSCG00000001805	WHAMM	7:52108868-52140409	3114	0.750076	0.713972	1.38002	2.1762	2.16263	1.61861	1.58757	1.53778	1.83301	0.316978	0.6132	0.699331
ENSSSCT00000002022	ENSSSCG00000001806	FSD2	7:52144505-52194133	3130	6.20894	4.13331	14.7584	4.76864	9.7167	14.4443	19.3257	18.2661	19.5618	5.03221	6.86426	5.76245
ENSSSCT00000002023	ENSSSCG00000001807	AP3B2	7:52256568-52296717	6283	1.75862e-05	0.00883343	1.76484e-05	1.7418e-05	0	0.00283726	1.83235e-05	0	0	1.81962e-05	0	0
ENSSSCT00000002024	ENSSSCG00000001808	CPEB1	7:52304846-52383732	3184	0	3.53191e-09	3.38126e-07	6.45097e-05	0.0181892	6.60267e-05	6.53653e-05	3.81111e-07	6.45173e-05	3.21638e-09	0	0
ENSSSCT00000002025	ENSSSCG00000001808	CPEB1	7:52303664-52382408	2231	0	0.00870134	3.99884e-39	1.32291e-28	0.00671474	3.89884e-65	6.21288e-08	0	1.33749e-07	0.00869055	0	0
ENSSSCT00000002027	ENSSSCG00000001810	-	7:52411981-52556789	2457	0.14267	0.00373673	0.28295	0.000136209	0.297672	0.191401	0.441758	0.060079	0.20818	0.100937	0.253339	4.7973e-06
ENSSSCT00000002028	ENSSSCG00000001808	CPEB1	7:52304471-52383732	3096	0	1.11405e-08	3.0858e-06	0.0686461	1.28062e-08	0.010917	0.0366535	2.97691e-06	0.0174985	1.02064e-08	0	0
ENSSSCT00000002031	ENSSSCG00000001810	-	7:52411981-52556789	2376	2.49624e-06	1.13254e-07	0.0541841	0.0414647	5.62768e-06	0.0700455	0.0393332	2.67509e-06	0.0340744	8.01235e-06	0.0262525	0.12529
ENSSSCT00000002032	ENSSSCG00000001810	-	7:52410778-52556923	3851	0.395334	0.398176	0.853977	2.17036	2.2097	1.79818	1.82232	0.800151	0.673647	0.142087	0.423126	0.373587
ENSSSCT00000002033	ENSSSCG00000001814	IQGAP1	7:53020508-53130721	7355	0.98104	1.0849	2.37349	6.97628	7.61817	6.39154	6.64716	3.07633	3.71538	0.807276	1.49426	1.69263
ENSSSCT00000002034	ENSSSCG00000001816	BLM	7:53319105-53416519	8483	0.00021168	7.96291e-10	9.42963e-09	1.19293e-06	0.0171292	1.97296e-06	1.77266e-06	1.5727e-09	1.09869e-06	7.36549e-09	6.50694e-07	1.12398e-07
ENSSSCT00000002035	ENSSSCG00000001816	BLM	7:53317539-53412647	4707	0.0436044	0.0356838	0.204746	0.301833	0.280193	0.508997	0.275283	0.333768	0.345846	0.0514948	0.12167	0.0716938
ENSSSCT00000002036	ENSSSCG00000001817	FURIN	7:53459234-53472785	4184	0.233791	7.68709e-05	1.54276e-05	4.30713e-09	0.315346	0.127473	3.14726e-05	1.923e-09	0.121667	7.75609e-05	0.000502848	5.97246e-05
ENSSSCT00000002037	ENSSSCG00000001818	FES	7:53472946-53485082	3492	0.289593	0.22182	0.955338	1.18047	1.54385	1.40219	1.92926	0.869054	0.891762	0.270232	0.431619	0.598743
ENSSSCT00000002038	ENSSSCG00000001819	MAN2A2	7:53498908-53520696	7124	1.69057	0.500337	3.17316	1.94437	2.61257	1.80321	2.84654	2.69057	3.43714	0.629553	0.750703	1.35349
ENSSSCT00000002039	ENSSSCG00000001820	HDDC3	7:53523731-53527923	3490	0.592481	0.338943	1.51733	0.928013	0.584183	0.989335	0.840981	0.667274	0.947871	0.142818	0.299115	0.265359
ENSSSCT00000002040	ENSSSCG00000001821	UNC45A	7:53530937-53545958	3259	0.842705	0.466438	2.07316	1.76226	1.35084	1.88002	1.96704	0.922655	1.25024	0.415504	0.800112	0.79951
ENSSSCT00000002041	ENSSSCG00000001822	RCCD1	7:53547057-53557863	2942	0.211258	0.233135	0.52322	0.354451	0.550912	0.313937	0.568553	0.469407	0.469729	3.68076e-06	0.312914	0.210741
ENSSSCT00000002042	ENSSSCG00000001823	UROC1	7:53605997-53633351	1923	0	0	0	0	0.00981818	0	1.7696e-69	1.09665e-33	0	0	3.35993e-50	7.38397e-52
ENSSSCT00000002043	ENSSSCG00000001824	ZXDC	7:53640395-53671398	2247	0.91911	1.03781	3.31063	3.82096	3.11691	2.72227	2.08883	0.689665	1.69233	0.359146	1.09797	1.20135
ENSSSCT00000002044	ENSSSCG00000001825	SLC41A3	7:53673263-53741421	1692	0.200678	4.39546e-09	0.395691	0.125081	0.132538	0.166763	0.0322296	0.0604851	0.0651849	0.031046	0.109531	1.82419e-05
ENSSSCT00000002046	ENSSSCG00000001826	-	7:53909424-53949628	2182	0	0	7.53847e-05	0.0511544	0.0170928	0	0.0178207	0	0	0	0	0
ENSSSCT00000002047	ENSSSCG00000001827	-	7:54061327-54063039	1599	0	0	0	0	0	0	0	0	0	0	2.61313e-05	0
ENSSSCT00000002048	ENSSSCG00000034559	-	7:54106804-54110254	957	0	0	0.0223849	0	0	0	0	0	0	0	0	0
ENSSSCT00000002052	ENSSSCG00000001832	ACAN	7:54479353-54519194	7081	0.11475	0.105575	0.0118908	0.0616871	3.59561e-06	0.0280564	5.79466e-25	0.00215707	0	9.25989e-11	0.00256201	0.00532231
ENSSSCT00000002056	ENSSSCG00000001834	MFGE8	7:54539706-54555040	2190	0.141173	0.179321	0.455937	0.478734	0.567829	0.640519	1.26684	0.279736	0.343235	1.98388e-29	0.235211	0.167061
ENSSSCT00000002057	ENSSSCG00000001835	ABHD2	7:54655618-54769962	1488	1.42957	0.979202	5.49629	9.08107	4.15379	3.2428	0.830392	1.10461	0.883496	0.180448	0.532382	0.55214
ENSSSCT00000002058	ENSSSCG00000001836	RLBP1	7:54783968-54799822	2083	0	4.26396e-290	2.92313e-130	4.12441e-146	0	0	0	0	2.38625e-276	0	0	0
ENSSSCT00000002059	ENSSSCG00000001837	FANCI	7:54811089-54889950	4554	0	4.90498e-24	2.22008e-89	0.190601	0.219579	0.653859	0.253036	4.03926e-14	4.56279e-34	0.0384964	0.0757481	0.0298607
ENSSSCT00000002060	ENSSSCG00000001838	POLG	7:54889156-54906876	4455	2.4243	1.30031	6.59065	5.00005	6.13896	6.30072	4.88475	4.34878	5.91485	0.776083	1.69842	1.06851
ENSSSCT00000002062	ENSSSCG00000001840	KIF7	7:55197151-55220264	8157	0.363747	0.387786	1.19461	1.56276	1.34349	0.847068	1.00958	0.56388	0.909377	0.22301	0.412558	0.392393
ENSSSCT00000002063	ENSSSCG00000001841	RHCG	7:55046244-55072218	3406	0.247721	0.149946	0.528313	1.1987	1.07613	1.04749	0.4592	0.261595	0.127012	0.0221909	0.0875208	0.0493858
ENSSSCT00000002064	ENSSSCG00000040355	TICRR	7:55143239-55200640	6817	2.35517e-23	0.00412086	4.74448e-29	0.0310294	0.010324	0.131222	0.0962033	1.89077e-05	1.45263e-54	0.0236542	0.0586284	0.0541853
ENSSSCT00000002065	ENSSSCG00000001840	KIF7	7:55197151-55220264	7956	0.0669773	5.09528e-06	0.041327	5.64511e-06	0.0770031	0.0327183	8.87811e-06	0.0414143	7.5454e-06	9.70305e-06	4.35181e-06	8.52825e-06
ENSSSCT00000002066	ENSSSCG00000001844	PLIN1	7:55237514-55250797	1579	0.000193913	0.0634915	2.25135e-05	3.68406e-05	1.21922e-05	0.0496516	0.0285134	0.0320724	8.15279e-06	4.21055e-06	7.39007e-06	5.97113e-05
ENSSSCT00000002067	ENSSSCG00000001844	PLIN1	7:55237348-55251510	1884	0.258937	2.78869e-06	0.645345	6.25972	0.773322	2.23664e-06	3.2525	1.08739	1.2027	0.135708	0.340375	0.577662
ENSSSCT00000002069	ENSSSCG00000001846	WDR93	7:55263841-55316448	2867	0.0330044	0.0332947	0.0195104	0.139774	0.120946	0.103223	0.0597708	0.0462666	0.0889594	0	0.0196843	0.0197331
ENSSSCT00000002070	ENSSSCG00000001847	MESP1	7:55320477-55323340	2580	0.036918	0.022345	0.0655155	0.0924648	0.0641483	0.151717	0.0817791	0.118366	0.0924884	0.00743962	0.05506	0.047814
ENSSSCT00000002071	ENSSSCG00000001848	MESP2	7:55343133-55345868	1766	0	0.0112212	0.0440142	0.107602	0.0539586	0.0547251	0	0.0111803	0.0323064	0	0.00553751	0.0166075
ENSSSCT00000002072	ENSSSCG00000001849	ANPEP	7:55351345-55366178	3104	4.77399e-06	9.94173e-06	3.39499e-07	0.0241088	1.46729e-06	5.25228e-06	8.49636e-07	2.21819e-06	7.48098e-07	0.0489297	1.13477e-06	1.42075e-06
ENSSSCT00000002073	ENSSSCG00000001850	-	7:55471098-55483436	791	0.593669	0.0870444	1.29717	1.10903	1.01682	1.46118	1.60482	0.497613	1.05975	0.164342	0.289767	0.615582
ENSSSCT00000002075	ENSSSCG00000001852	IDH2	7:55654296-55675571	1817	79.1813	53.9494	223.914	209.814	277.258	247.372	84.8109	63.5052	85.9305	12.2129	27.2055	29.4164
ENSSSCT00000002083	ENSSSCG00000001858	CIB1	7:55795067-55798621	815	2.80879	1.37446	5.63418	6.2809	6.29559	5.57737	5.09773	3.02644	3.31217	1.04201	1.77389	2.75532
ENSSSCT00000002084	ENSSSCG00000001859	-	7:55806635-55807790	1155	0.23341	0.144841	0.571613	0.787232	0.386594	0.410353	0.548088	0.526152	0.771138	0.090357	0.250789	0.23183
ENSSSCT00000002085	ENSSSCG00000001860	NRG4	7:56199282-56261173	342	1.46796	0.98408	1.35599	4.36304	5.52301	5.03646	0.754482	1.57844	0.631506	0.390896	0.500885	0.38024
ENSSSCT00000002087	ENSSSCG00000001862	ETFA	7:56450524-56540253	1293	6.46892	10.1249	35.0503	61.7068	77.6315	65.6306	34.2259	23.9411	29.0011	4.10933	6.58769	6.10828
ENSSSCT00000002088	ENSSSCG00000001863	TMEM266	7:56311521-56439327	1801	1.41604	0.552611	1.89325	0.87681	2.69768	1.61109	0.85028	0.393868	0.399809	0.257079	0.610837	0.300068
ENSSSCT00000002089	ENSSSCG00000001863	TMEM266	7:56311521-56439327	1738	7.21015e-05	0.000145963	4.22292e-06	0.0748988	0.113951	1.34662e-05	1.72493e-05	0.0366718	0.000167701	0.0065455	0.000143359	1.21294e-05
ENSSSCT00000002090	ENSSSCG00000001865	SCAPER	7:56634825-57012369	4101	0.284922	0.30377	0.717879	1.95831	1.90869	1.29838	0.960827	0.891384	1.24583	0.15144	0.1889	0.347109
ENSSSCT00000002091	ENSSSCG00000001866	RCN2	7:57041032-57058747	2134	0.579299	1.04999	2.14034	6.88322	7.49566	7.83938	6.07078	4.28634	3.35593	0.802444	1.39572	1.23483
ENSSSCT00000002092	ENSSSCG00000001867	PSTPIP1	7:57102756-57146751	3354	0.447561	0.244333	0.674956	0.387684	0.194426	0.135906	0.183703	0.123141	0.346202	0.136991	0.106845	0.141372
ENSSSCT00000002093	ENSSSCG00000001868	TSPAN3	7:57162083-57187409	1602	6.94063	6.94346	29.9804	35.5442	40.4849	38.8539	44.6362	31.2213	32.7024	8.68626	9.53496	10.0946
ENSSSCT00000002094	ENSSSCG00000001869	PEAK1	7:57223850-57503648	6997	1.05316	1.01003	1.59786	3.19313	2.85691	2.39054	2.17456	1.74273	2.5292	0.858131	1.40436	1.22064
ENSSSCT00000002096	ENSSSCG00000001871	HMG20A	7:57504258-57570031	3796	0.26911	0.586479	1.11641	1.14003	1.61845	1.26503	1.08242	0.533836	0.784246	0.554608	0.56482	0.662291
ENSSSCT00000002097	ENSSSCG00000001872	LINGO1	7:57685214-57702549	2647	0.355512	0.146647	0.413346	0.670546	0.97914	0.824332	1.35205	1.95886	1.67192	0.766911	0.919086	0.747248
ENSSSCT00000002098	ENSSSCG00000001873	CSPG4	7:57949454-57988335	7957	2.32628	0.786224	3.07323	2.66573	2.49028	2.92068	1.7129	0.910228	0.882295	0.337332	0.732554	0.87352
ENSSSCT00000002100	ENSSSCG00000001875	SNX33	7:58003018-58014441	3782	0.793647	0.643692	1.25183	1.56311	1.06183	0.941212	1.05964	0.361522	0.448184	0.125492	0.264568	0.393138
ENSSSCT00000002101	ENSSSCG00000001877	SNUPN	7:58023417-58066394	2489	1.04972	0.612367	3.1708	3.51747	3.29983	3.43192	5.03159	3.19853	4.51363	0.90937	1.75259	1.45416
ENSSSCT00000002102	ENSSSCG00000001877	SNUPN	7:58039011-58065964	1317	1.28432	0.866477	4.02231	2.94393	3.27779	2.59905	1.47074	1.35469	2.08322	0.159932	0.388962	0.548432
ENSSSCT00000002103	ENSSSCG00000001878	PTPN9	7:58078388-58164405	4763	1.04818	0.752	3.07186	3.56922	2.85766	2.53595	2.27879	1.43126	1.25524	0.414776	0.836647	0.642676
ENSSSCT00000002104	ENSSSCG00000001879	ODF3L1	7:57935609-57938958	1010	0	0.0211901	0	0	0	0	0	0	0	0	0	0
ENSSSCT00000002105	ENSSSCG00000001880	SIN3A	7:58172076-58245860	4818	0.725107	0.82175	1.98564	1.98746	1.81162	1.88804	1.62297	1.27106	1.42734	0.716006	0.666216	0.672589
ENSSSCT00000002106	ENSSSCG00000001881	MAN2C1	7:58248705-58261202	3131	0.56643	0.184585	1.59652	1.30077	0.699603	0.719452	0.523759	0.143802	0.729241	0.209611	0.162761	0.279138
ENSSSCT00000002107	ENSSSCG00000001882	NEIL1	7:58261764-58268364	1511	0.0213764	2.48648e-07	0.0809449	0.0432997	0.163531	0.0265605	0.0852536	0.104971	2.43412e-11	2.67541e-56	0.0425891	1.23764e-32
ENSSSCT00000002109	ENSSSCG00000001884	COMMD4	7:58276958-58283063	1068	1.12964	0.636168	2.83651	2.96052	2.71676	2.28125	2.79241	2.31078	1.54411	0.566564	1.01886	1.08526
ENSSSCT00000002110	ENSSSCG00000001885	C15orf39	7:58379691-58390100	5383	0.590179	0.310664	0.722767	0.436487	0.374588	0.575838	0.446086	0.430555	1.00065	0.203472	0.519797	0.412906
ENSSSCT00000002113	ENSSSCG00000001887	SCAMP5	7:58550192-58608056	3592	0.24471	0.194348	0.399645	0.345267	0.415992	0.553552	0.455113	0.239549	0.21015	0.167912	0.237964	0.155712
ENSSSCT00000002114	ENSSSCG00000001888	RPP25	7:58608542-58610078	1536	0.0259687	0.0130955	0.0514515	0	0.0126257	0.0256175	0.0262935	0.0130682	0.0503882	0	0.0388009	0.0129149
ENSSSCT00000002118	ENSSSCG00000001892	SCAMP2	7:58672666-58699139	2364	0.657963	0.531036	1.52225	3.34065	1.48075	2.26414	1.10559	0.495401	1.34888	0.392709	0.89065	0.60718
ENSSSCT00000002123	ENSSSCG00000001895	CPLX3	7:58712623-58717030	1603	0.0371448	0.0124879	0.0245189	0.0599577	0.0120301	0.0244069	0	0.0124555	0.0120034	0	0	0.0123176
ENSSSCT00000002126	ENSSSCG00000001898	ULK3	7:58699983-58707185	2537	0.970151	0.478319	1.88386	2.72804	2.27054	1.92487	1.21235	0.815841	1.60471	0.257954	0.33208	0.449414
ENSSSCT00000002127	ENSSSCG00000001899	LMAN1L	7:58717820-58730172	1693	0	0	0.0115327	0	0	0	0.011785	0	0	0	0	0.011597
ENSSSCT00000002128	ENSSSCG00000001900	CSK	7:58736472-58755327	3174	0.247889	2.56298e-05	0.452786	0.334899	0.344785	0.104512	0.474731	0.324131	0.46087	0.0182442	0.135026	0.084586
ENSSSCT00000002129	ENSSSCG00000001901	CYP1A2	7:58779474-58786117	2078	0.00931578	0	0	0	0.00901533	0	0	0	0	0	0	0
ENSSSCT00000002132	ENSSSCG00000001903	EDC3	7:58828692-58897581	6520	0.274005	0.169643	0.672954	0.565363	0.493031	0.41151	0.361582	0.335941	0.387128	0.08117	0.126102	0.211664
ENSSSCT00000002133	ENSSSCG00000001904	CLK3	7:58895335-58906393	1786	1.82569	1.11487	2.89766	4.57876	8.1465	4.94177	3.06372	1.451	2.09958	0.668637	0.961822	0.842466
ENSSSCT00000002134	ENSSSCG00000001905	ARID3B	7:58934779-58995973	1710	0.426501	0.383671	0.604462	0.881138	0.46987	0.499269	0.489481	0.498279	0.435368	0.208973	0.206578	0.355578
ENSSSCT00000002135	ENSSSCG00000001906	CYP1A1	7:58802879-58809775	3500	0.00886861	0.0107944	0.0210615	0.206876	0.185434	0.026097	0.311206	0.0481645	0.00950607	0.129401	0.0604877	0.175845
ENSSSCT00000002136	ENSSSCG00000001907	UBL7	7:59070712-59084120	1378	3.10966	2.05622	8.51296	11.2648	11.5928	10.502	9.32765	4.67143	7.71475	1.22579	2.06128	1.82284
ENSSSCT00000002137	ENSSSCG00000001908	CCDC33	7:59190437-59287891	2268	0	0	0	0	0	0	0.00427195	0	0	0	0	0
ENSSSCT00000002138	ENSSSCG00000001909	STRA6	7:59317962-59347264	2917	0.0194435	0	0	0.0124747	0	0.00633334	0.01956	0.0129781	0.0187143	0	0.0128844	0.0129173
ENSSSCT00000002139	ENSSSCG00000001910	ISLR	7:59349679-59352843	2336	2.31562	2.42697	5.33071	4.7582	5.95934	4.5611	5.75924	1.44897	2.38396	0.686661	1.47816	1.69301
ENSSSCT00000002141	ENSSSCG00000001912	PML	7:59408592-59450046	2624	0.20732	0.000357776	0.219637	0.854623	1.12084	0.614548	1.20572	0.317022	0.88945	0.196205	0.235345	0.855971
ENSSSCT00000002142	ENSSSCG00000001913	STOML1	7:59452116-59461206	2100	0.368406	0.130064	0.64571	1.05786	1.38134	0.993935	0.929042	0.369661	0.613705	0.120618	0.119118	0.192589
ENSSSCT00000002143	ENSSSCG00000001914	LOXL1	7:59481406-59505149	2442	0.649888	0.36333	1.59085	1.13195	1.14952	2.16959	1.75891	0.690625	0.713106	0.331341	0.778636	0.748778
ENSSSCT00000002145	ENSSSCG00000001916	C15orf59	7:59665363-59677079	1491	0.389273	0.13538	1.31696	0.572658	0.692174	1.55028	5.11249	4.06116	4.46273	0.635288	1.55124	1.18813
ENSSSCT00000002146	ENSSSCG00000001917	CD276	7:59629637-59717334	1659	2.82613e-18	0.0132087	0.00107265	2.43237e-29	0.0525646	1.76155e-29	0.0859828	1.98549e-10	2.14511e-48	1.77781e-23	5.18256e-82	0.0223482
ENSSSCT00000002147	ENSSSCG00000001918	NPTN	7:59758205-59840591	4215	0.471451	0.445275	1.14304	1.9293	2.07356	1.66938	1.62398	1.04789	0.986472	0.274016	0.382621	0.224839
ENSSSCT00000002149	ENSSSCG00000001920	HCN4	7:60010481-60049688	3600	0	0.00524044	0.0255584	0	0.0100004	0	0	0	0.00499186	0	0.0103221	0.00517835
ENSSSCT00000002150	ENSSSCG00000001921	NEO1	7:60064990-60299788	6976	0.0928766	0.311183	0.673391	0.389617	0.445811	0.282243	1.38835	0.58556	0.920941	0.461796	0.268356	0.8657
ENSSSCT00000002153	ENSSSCG00000001924	BBS4	7:60631913-60693326	2527	0.298622	0.640057	0.73193	2.78782	2.3607	2.00385	1.73104	0.700336	0.857231	0.0828354	0.0304238	3.83167e-05
ENSSSCT00000002154	ENSSSCG00000001925	ADPGK	7:60584034-60623899	2550	0.478481	0.42234	1.59223	2.59296	2.49018	2.61923	2.70272	1.16864	1.14553	0.271185	0.431155	0.43944
ENSSSCT00000002156	ENSSSCG00000001927	-	7:60877888-60913339	4106	0.0943129	6.29154e-07	9.70554e-07	0.0219743	0.0694682	0.011163	7.55016e-07	8.89016e-07	0.0243455	5.07444e-07	3.53506e-07	7.9067e-07
ENSSSCT00000002158	ENSSSCG00000001929	PARP6	7:60972821-60999863	2670	0.826443	0.450746	1.49403	1.74399	1.93419	1.50049	2.20636	1.48147	1.82578	0.708307	0.717458	0.696139
ENSSSCT00000002159	ENSSSCG00000001930	PKM	7:61007088-61032773	2600	46.1968	27.8233	112.704	83.3817	104.881	183.044	413.028	313.879	390.365	117.619	214.206	177.102
ENSSSCT00000002162	ENSSSCG00000001931	-	7:61033830-61078507	2916	0.0648353	0.0196218	0.204391	0.124792	0.168789	0.430825	0.691372	0.707563	1.51675	0.405066	0.418895	0.471651
ENSSSCT00000002164	ENSSSCG00000001932	-	7:61098945-61108699	744	0	0	0	0	0	0.0309663	0	0	0	0	0	0
ENSSSCT00000002166	ENSSSCG00000001934	-	7:61113783-61193266	4613	0.802703	0.935365	2.76418	4.31532	4.21686	4.14984	5.02991	3.5802	4.09256	0.74236	1.11308	1.11187
ENSSSCT00000002170	ENSSSCG00000001938	SSTR1	7:61892955-61894128	1173	0	0	0	0.0171774	0.0690124	0.0700651	0.0179393	0	0.0172078	0.017751	0.0175935	0
ENSSSCT00000002174	ENSSSCG00000001942	PAX9	7:63324707-63346326	4647	0.0318599	0.0522327	0.0704693	0.122318	0.114827	0.143472	0.0799292	0.0318348	0.0802518	0.0280987	0.0197766	0.00397151
ENSSSCT00000002178	ENSSSCG00000001946	MBIP	7:63659279-63684529	1635	0.367357	0.441605	0.723381	1.9506	1.83927	2.2282	3.0588	1.81967	2.45911	0.397272	0.566485	0.291427
ENSSSCT00000002179	ENSSSCG00000001947	BRMS1L	7:64083288-64123857	2689	0.310877	0.293574	0.905307	2.50381	2.3225	2.33593	2.34691	1.74101	2.59147	0.420032	0.695398	0.457576
ENSSSCT00000002181	ENSSSCG00000001949	INSM2	7:64374822-64376495	1167	0	0	0	0.0345633	0.0173583	0	0	0	0	0	0	0
ENSSSCT00000002182	ENSSSCG00000001950	-	7:64620532-64763281	2803	0.528627	0.391541	1.16526	1.28837	1.26066	1.34792	1.07139	1.11114	1.32146	0.230832	0.367735	0.368022
ENSSSCT00000002183	ENSSSCG00000001951	PSMA6	7:64575558-64603258	3590	2.48499	1.99717	8.4436	12.8925	13.1942	10.8692	9.51586	4.42383	5.34694	1.19182	1.75471	1.97869
ENSSSCT00000002184	ENSSSCG00000001952	NFKBIA	7:64507742-64511304	1871	5.87918	5.61409	13.4088	19.7713	30.5237	23.4208	13.5312	7.65665	5.07002	1.32534	1.36151	1.51758
ENSSSCT00000002187	ENSSSCG00000001955	SRP54	7:64829227-64877574	2968	0.547259	0.924409	2.63895	4.05974	4.27592	4.09718	5.03107	2.85402	3.33755	0.545056	0.822244	0.792696
ENSSSCT00000002190	ENSSSCG00000001958	BAZ1A	7:64970387-65069102	4674	0.353024	0.317378	1.29393	2.8862	2.22288	1.89078	1.4767	1.12737	1.13468	0.347137	0.242491	0.398247
ENSSSCT00000002192	ENSSSCG00000001959	CFL2	7:65090622-65094515	3577	2.95913	4.26605	13.0396	27.3658	14.5982	25.9522	17.6352	10.3852	12.1037	2.05059	3.40355	2.53875
ENSSSCT00000002193	ENSSSCG00000001960	EAPP	7:65240203-65263272	1331	0.640785	1.16935	2.71828	8.64128	9.93945	5.99496	3.42167	2.30752	3.42875	0.337926	0.638757	0.576282
ENSSSCT00000002196	ENSSSCG00000001963	EGLN3	7:65805486-65833573	3283	5.16097	4.66971	8.72556	9.56239	10.2293	11.79	1.9268	1.32251	2.88306	0.328667	0.761907	0.849755
ENSSSCT00000002197	ENSSSCG00000001964	NPAS3	7:65928448-66204892	2001	0.00347877	4.93116e-06	1.33258e-06	0.17096	2.90528e-05	0.000703341	0.0293348	0.0486638	0	0.00972801	0.00961186	0.0386497
ENSSSCT00000002198	ENSSSCG00000024517	AKAP6	7:66922452-67375269	6804	2.23963	2.71143	7.08026	4.63746	4.91213	6.50281	1.93306	5.15176	4.9597	1.24564	1.79873	1.71244
ENSSSCT00000002199	ENSSSCG00000001966	ARHGAP5	7:67494938-67631427	7345	0.928513	0.784638	2.78468	4.38322	4.77731	3.96742	4.32947	4.12854	3.54749	0.652435	1.07461	0.813678
ENSSSCT00000002201	ENSSSCG00000001968	NUBPL	7:67788987-68035258	1046	0.252304	0.0937485	0.306114	4.44912e-05	0.638276	0.212454	0.482388	0.308988	5.44663e-06	0.0198586	0.00075755	0.0553085
ENSSSCT00000002203	ENSSSCG00000001970	HEATR5A	7:68161059-68257904	6102	1.5127	1.41698	3.98778	5.43682	4.58992	4.49135	4.37177	4.05958	3.87105	0.89127	1.42129	1.36196
ENSSSCT00000002204	ENSSSCG00000001971	HECTD1	7:68318416-68422394	9199	6.70795	5.91435	18.1317	28.9902	32.4447	25.3129	15.8302	19.2307	19.5124	3.464	5.59529	5.44462
ENSSSCT00000002205	ENSSSCG00000001972	AP4S1	7:68426258-68447491	435	0.519179	0.457329	1.21091	2.86284	2.23147	1.592	1.7313	0.817417	1.20917	0.195032	0.525999	0.190807
ENSSSCT00000002206	ENSSSCG00000001973	SCFD1	7:68742147-68850980	2010	0.493083	0.484312	1.34475	3.82292	3.1644	3.1712	4.49715	2.72154	2.39595	0.536871	0.667076	0.786518
ENSSSCT00000002207	ENSSSCG00000001974	G2E3	7:68852782-68917062	6176	0.125806	0.0840307	0.20939	1.33401	1.21569	1.32283	0.879149	0.411009	0.520336	0.0958018	0.168094	0.137206
ENSSSCT00000002209	ENSSSCG00000001975	PRKD1	7:69528171-69872090	2601	0.657422	0.639884	1.86676	0.963653	0.76266	1.52767	0.205954	0.250915	0.276594	0.10273	0.16916	0.151289
ENSSSCT00000002211	ENSSSCG00000001977	STXBP6	7:74313066-74548378	699	9.41474e-08	5.32547e-08	1.43343e-07	1.97645e-07	3.3295e-06	2.22026e-06	0.0490851	2.40175e-07	1.65748e-07	1.09022e-05	2.36073e-05	0.0218875
ENSSSCT00000002212	ENSSSCG00000001978	GZMB	7:74705060-74709061	1604	0	0	0.0245017	0.0479325	0.107365	0.15184	0.0703845	0.0545033	0.117743	0.112145	0.0726189	0.294695
ENSSSCT00000002214	ENSSSCG00000001979	-	7:74774984-74778435	1340	0	0	0.0300533	0.0294144	0	0	0.0614513	0.0305295	0	0	0	0
ENSSSCT00000002218	ENSSSCG00000001982	-	7:74826913-74830017	714	0.00136655	0.0013773	0.00138446	0	0	0	0.00132828	0.00134649	0	0	0	0
ENSSSCT00000002219	ENSSSCG00000001983	SDR39U1	7:74851291-74854203	1228	0.0797336	5.96319e-07	0.233368	0.35235	0.408148	0.334805	2.24583e-05	0.176989	0.188667	0.0638428	0.00012367	0.0562845
ENSSSCT00000002220	ENSSSCG00000001984	KHNYN	7:74852648-74865122	6488	0.538943	0.421603	1.27557	2.12302	1.66796	2.03306	1.22232	0.864986	1.11983	0.321507	0.512439	0.658246
ENSSSCT00000002221	ENSSSCG00000001985	CBLN3	7:74865290-74868460	2520	0.052999	0.0229129	0.0671917	0.204259	0.124279	0.0666926	0.060999	0.0227613	0.0510791	0.00762859	0	0.0301704
ENSSSCT00000002222	ENSSSCG00000001986	NFATC4	7:74918983-74929600	3254	0.430399	0.672748	1.30991	2.21299	0.975052	0.723926	1.09613	0.388179	0.525342	0.157811	0.390063	0.279499
ENSSSCT00000002223	ENSSSCG00000001987	RIPK3	7:74951104-74956829	3489	0.368591	0.277289	0.805787	0.383945	0.54054	0.503134	0.614811	0.295994	0.324256	0.106789	0.221182	0.270996
ENSSSCT00000002224	ENSSSCG00000001988	ADCY4	7:74956245-74972200	3265	0.178564	0.130983	0.62532	0.575838	0.494372	0.609052	1.08888	0.314563	0.339347	0.162031	0.136796	0.351977
ENSSSCT00000002226	ENSSSCG00000001989	CIDEB	7:74982854-74985775	1186	0	0	2.25465e-32	0.050867	0.102177	0.0518662	0.0708326	0.0351749	0.0849257	0	0.0173694	0.0691886
ENSSSCT00000002227	ENSSSCG00000001989	CIDEB	7:74982942-74985519	651	0	0	0.0735414	0	1.55803e-36	0	1.20544e-16	0	0	0	0	0
ENSSSCT00000002228	ENSSSCG00000001990	NOP9	7:74985752-74992951	2892	0.251998	0.089859	0.509383	0.499524	0.742286	0.504052	0.729672	0.326203	0.612378	0.102206	0.265714	0.177682
ENSSSCT00000002229	ENSSSCG00000001991	DHRS1	7:74992114-75002151	1482	0.494391	0.512389	1.73981	1.33884	1.04316	1.10433	1.48712	0.819537	0.856682	0.389298	0.546723	0.595042
ENSSSCT00000002230	ENSSSCG00000001992	RABGGTA	7:75022121-75030070	3978	0.260878	0.139236	0.490408	0.346772	0.34831	0.340279	1.78388	1.00267	1.06396	0.345407	0.794173	0.713392
ENSSSCT00000002232	ENSSSCG00000001994	TINF2	7:75056808-75060489	2565	0.183307	0.250228	0.640706	1.51603	1.3431	0.938133	0.864295	0.236535	0.342206	0.182856	0.194655	0.289248
ENSSSCT00000002237	ENSSSCG00000001999	-	7:75089440-75118735	6840	0.224296	0.0492595	0.433043	0.285068	0.314275	0.165063	0.256757	0.249875	0.636924	0.0891642	0.0898011	0.138991
ENSSSCT00000002238	ENSSSCG00000002000	IPO4	7:75104514-75118735	5999	1.76842	1.46026	6.20805	4.54782	3.30781	3.83783	3.45947	1.73365	4.37847	0.711031	1.0805	1.41958
ENSSSCT00000002239	ENSSSCG00000002001	REC8	7:75118743-75139630	5088	0.184993	0.109139	0.241413	0.501029	0.814997	0.505342	0.412662	0.326805	0.79496	0.168815	0.180417	0.299598
ENSSSCT00000002240	ENSSSCG00000002002	IRF9	7:75133695-75139230	1700	0.800335	0.364719	1.21978	4.60291	7.69176	3.5042	4.08885	1.22211	2.6343	0.920923	1.20016	1.98747
ENSSSCT00000002241	ENSSSCG00000002003	-	7:75140208-75157549	3420	2.35953	1.4075	5.16964	3.74441	5.03428	3.47891	2.22266	2.07033	2.78118	0.642486	0.991516	1.08372
ENSSSCT00000002242	ENSSSCG00000002004	-	7:75153773-75159030	2801	0.92015	0.716655	2.88677	2.8528	3.73288	3.51215	4.79301	2.11398	3.52425	0.865832	1.01559	1.64498
ENSSSCT00000002243	ENSSSCG00000002005	EMC9	7:75159235-75161829	866	2.15057	1.45385	9.32225	7.04492	9.27625	8.65	11.0485	6.06979	11.1903	1.24688	2.32795	2.70828
ENSSSCT00000002244	ENSSSCG00000002006	PSME1	7:75160764-75164810	2076	1.94346	1.50704	4.70781	4.08418	3.53087	3.53733	4.82096	2.69633	4.58458	1.24183	1.50963	2.32634
ENSSSCT00000002246	ENSSSCG00000002007	FITM1	7:75161830-75168634	2313	7.51915	4.19004	24.9673	28.0745	36.8213	36.9586	38.1729	17.697	19.6599	3.09623	5.34776	6.31506
ENSSSCT00000002247	ENSSSCG00000002008	DCAF11	7:75168838-75181142	5553	1.59719	1.13462	3.34763	3.18312	3.31093	3.07202	4.38622	4.11438	4.05053	0.893861	1.46048	1.46292
ENSSSCT00000002248	ENSSSCG00000002009	PCK2	7:75187198-75197638	2336	0.158482	0.117	1.06809	0.228788	0.736312	0.23074	0.302462	0.311874	0.760924	0.160244	0.441505	0.157264
ENSSSCT00000002249	ENSSSCG00000002010	NRL	7:75199195-75210605	897	0.0727113	0	0.0242447	0	0	0.0486184	0.0248184	0	0	0	0	0
ENSSSCT00000002251	ENSSSCG00000002012	CARMIL3	7:75225429-75241264	3848	0.000218343	2.21798e-06	0.000218637	0.231162	0.000208427	1.16029e-06	3.04403e-06	6.72316e-06	3.05123e-06	0	5.57917e-06	2.53441e-06
ENSSSCT00000002252	ENSSSCG00000002013	DHRS4	7:75241350-75255701	2020	0.684682	0.414603	1.59424	3.1264	2.78142	3.58204	1.09039	0.574675	1.19486	0.156117	0.30459	0.492652
ENSSSCT00000002253	ENSSSCG00000002014	JPH4	7:75522792-75532962	4090	0.0409217	0.0166884	0.0300383	0.0750786	0.0500979	0.0907598	0.0607548	0.0294534	0.0130982	8.54734e-10	0.0118552	0.0045336
ENSSSCT00000002254	ENSSSCG00000002015	AP1G2	7:75533201-75549488	2632	0.034536	0.114442	0.286488	0.369684	0.239755	0.531555	0.169583	0.0653546	0.127863	6.25525e-07	0.0714329	4.76124e-05
ENSSSCT00000002255	ENSSSCG00000002016	THTPA	7:75545972-75552904	5276	0.89476	0.335367	1.88801	1.47299	1.18947	1.3713	0.982891	0.978947	1.59176	0.337995	0.701503	0.6053
ENSSSCT00000002259	ENSSSCG00000002020	-	7:75621341-75629447	1124	1.11189	0.517723	3.32027	5.23954	4.68278	3.09894	3.26179	1.7985	2.98682	0.577706	0.875477	0.644107
ENSSSCT00000002260	ENSSSCG00000032977	PPP1R3E	7:75776922-75780642	1380	0.0191715	0.0389087	0.137953	0.0518002	0.109345	0.0479912	0.140966	8.1941e-07	0.109976	1.91824e-12	4.00386e-07	0.0445464
ENSSSCT00000002263	ENSSSCG00000002023	PABPN1	7:75752064-75756514	915	1.4645	2.64962	2.79573	2.44867	3.22538	4.98825	1.86882	0.692845	1.14357	0.748114	2.05513	1.21573
ENSSSCT00000002265	ENSSSCG00000002025	SLC22A17	7:75734874-75741112	2429	0.713432	0.69905	2.01161	1.18658	1.00666	1.77392	2.00705	0.704659	0.846185	0.277693	0.509085	0.674611
ENSSSCT00000002266	ENSSSCG00000002026	EFS	7:75722182-75731592	2729	0.737273	0.603419	1.93992	1.6341	1.30184	1.55073	0.644033	0.285626	0.375111	0.133161	0.38722	0.464328
ENSSSCT00000002268	ENSSSCG00000002028	CMTM5	7:75707132-75710017	1178	0.122843	0	0.174533	0.512742	0.257497	0.296277	0.249896	0.124093	0.222579	0.158976	0.140053	0.0697294
ENSSSCT00000002271	ENSSSCG00000002029	MYH7	7:75650846-75672910	6158	165.347	101.953	270.081	288.523	103.334	352.351	61.5067	138.813	187.73	37.222	59.4809	80.4495
ENSSSCT00000002275	ENSSSCG00000002033	CEBPE	7:75927661-75929769	1526	0	0	0	0	0	0	0.0264884	0.0131648	0.0126907	0	0	0
ENSSSCT00000002276	ENSSSCG00000002034	ACIN1	7:75951352-75989230	4256	2.90191	2.67694	4.8708	5.45541	5.02284	4.08163	2.83027	3.04784	5.26206	1.46621	1.76957	1.63428
ENSSSCT00000002277	ENSSSCG00000002035	C14orf119	7:75947770-75951806	2214	0.382759	0.508945	1.22781	2.58465	2.574	2.2514	1.41204	0.37518	0.604474	0.219097	0.328813	0.285888
ENSSSCT00000002278	ENSSSCG00000002036	-	7:76014901-76021920	720	6.98141	4.29568	22.012	16.9796	19.5913	20.0237	21.9686	12.6514	13.3661	2.31993	5.59731	5.15632
ENSSSCT00000002279	ENSSSCG00000002037	CDH24	7:75990219-76001130	3390	0.0995767	0.0836745	0.150005	0.117003	0.0745822	0.161747	0.212797	0.138366	0.031904	0.0334502	0.0494726	0.0528044
ENSSSCT00000002281	ENSSSCG00000002039	MMP14	7:76174679-76185920	3531	3.85467	3.48582	9.97491	15.1032	17.2209	8.45097	5.63143	2.10193	3.57083	1.115	2.13377	2.27554
ENSSSCT00000002282	ENSSSCG00000002040	MRPL52	7:76187453-76191616	813	1.77797	1.37867	6.69441	5.97759	5.36688	4.85096	6.79962	5.70974	6.80739	1.43026	2.98386	2.1676
ENSSSCT00000002284	ENSSSCG00000002041	SLC7A7	7:76201211-76235404	2301	0.00221205	0.0864338	0.127737	0.5062	0.297895	0.251633	0.231308	0.0287642	0.113176	1.93243e-08	2.88717e-07	0.000431083
ENSSSCT00000002285	ENSSSCG00000002042	OXA1L	7:76230905-76266427	6562	2.83874	2.83031	7.99874	11.138	13.7319	12.6757	6.13835	3.24062	5.01754	1.34499	2.21139	1.99652
ENSSSCT00000002288	ENSSSCG00000002045	-	7:76362991-76363747	756	0.0449518	0.0453091	0.150635	0.147923	0.0893994	0.0757879	0.0154324	0.0458697	0.103924	0.0301261	0.0450259	0.0148313
ENSSSCT00000002293	ENSSSCG00000002050	DAD1	7:76431963-76457890	1243	1.73209	1.49718	8.08089	8.61756	11.0543	11.0573	11.7998	5.34457	5.32026	1.06278	2.03987	2.26201
ENSSSCT00000002294	ENSSSCG00000002051	ABHD4	7:76404505-76419641	2301	0.61882	0.292387	0.121822	0.853168	0.646351	0.000275982	1.41387	0.302741	0.0319968	0.36816	0.867272	0.000730548
ENSSSCT00000002295	ENSSSCG00000002052	OR6J1	7:76392242-76393256	1014	0.0209178	0.0632729	0.104322	0.265811	0.349394	0.35491	0.0213482	0.105942	0.12296	0.0420952	0.0626708	0.0415172
ENSSSCT00000002298	ENSSSCG00000002055	-	7:76720811-76721102	291	0	0	0	0	0.152757	0	0	0	0	0	0	0
ENSSSCT00000002321	ENSSSCG00000040548	-	7:77313682-77321022	885	0	0	0	0	0	0	0	0	0	0	0	8.19262e-18
ENSSSCT00000002326	ENSSSCG00000002081	-	7:76978174-76979901	1256	0.195606	0.156162	0.178136	0.332933	0.270624	0.207366	0.171111	0.279645	0.198486	0.0328186	0.0243817	0.109336
ENSSSCT00000002331	ENSSSCG00000002090	-	7:76996505-77004698	489	0	0	0	0	0	0	0	0.056476	0	0	0	0
ENSSSCT00000002336	ENSSSCG00000036513	-	7:77283911-77284631	540	0	0	0	0	0	0.146315	0.0492397	0	0	0.047154	0	0
ENSSSCT00000002348	ENSSSCG00000002099	-	7:77419632-77420201	459	0	0	0	0	0	0	0.126745	0	0.0613995	0.0598334	0	0.175776
ENSSSCT00000002379	ENSSSCG00000002127	CHD8	7:77719516-77780205	8554	0.566864	0.95289	2.10687	2.439	1.37497	1.11488	1.69071	1.39404	2.0202	0.889831	0.583626	0.764093
ENSSSCT00000002382	ENSSSCG00000002129	RPGRIP1	7:77814775-77887875	3543	0.05282	0.037301	0.0519819	0.081228	0.0305102	0.0669834	0.0265367	0.0105666	0.020306	0	0	0.0105309
ENSSSCT00000002387	ENSSSCG00000002134	RNASE10	7:78391474-78394035	785	0	0	0	0	0	0	0.0587842	0	0	0	0	0
ENSSSCT00000002388	ENSSSCG00000002135	PNP	7:78427280-78447146	1239	4.01579e-70	5.65498e-13	7.32568e-13	9.62195e-20	4.49031e-14	2.80879e-08	3.94519e-42	2.38027e-79	3.00732e-25	0.0351019	8.65789e-09	1.5788e-10
ENSSSCT00000002392	ENSSSCG00000002138	OSGEP	7:78454665-78462259	1351	1.035	0.862286	3.73671	3.38771	3.06325	3.50595	3.55678	2.51023	2.35976	0.52852	0.589812	0.818683
ENSSSCT00000002394	ENSSSCG00000002140	-	7:78470420-78479959	4796	3.47806	3.3866	7.19565	3.14726	10.0746	6.42744	3.85087	3.16218	5.12978	1.73737	1.85221	2.95445
ENSSSCT00000002396	ENSSSCG00000002142	TEP1	7:78491052-78530146	7946	1.15905	1.17405	2.37465	2.02302	2.03819	1.76113	0.899052	1.21154	1.94951	0.367887	0.676634	0.948031
ENSSSCT00000002397	ENSSSCG00000002143	PARP2	7:78531708-78551424	5306	0.19446	0.206702	0.651714	1.30247	1.41341	1.1994	0.821974	0.647843	0.713993	0.154011	0.268959	0.234198
ENSSSCT00000002398	ENSSSCG00000002144	CCNB1IP1	7:78553782-78575344	2520	0.514848	0.557546	3.76274	2.8888	3.42134	2.93818	3.43882	1.66157	2.75462	0.38143	0.782955	0.43747
ENSSSCT00000002399	ENSSSCG00000002145	TTC5	7:78578231-78599162	2740	0.353214	0.265491	1.05112	0.993586	0.995569	1.13095	0.857348	0.388451	0.493552	0.167487	0.158357	0.227726
ENSSSCT00000002413	ENSSSCG00000039189	-	AEMK02000253.1:179249-180187	938	0	0	0	0.0224935	0	0	0	0	0	0	0	0
ENSSSCT00000002422	ENSSSCG00000032247	-	7:79035327-79036274	912	0	0	0	0	0	0	0	0.120582	0.0233538	0	0	0
ENSSSCT00000002423	ENSSSCG00000039081	-	AEMK02000410.1:260313-261387	864	0	0	0	0.0122949	0	0.0380723	0.0258485	0	0	0	0.0125053	0
ENSSSCT00000002424	ENSSSCG00000002170	-	AEMK02000410.1:285351-286281	930	0	0	0	0.022733	0.0228624	0	0.0237304	0	0.0113962	0	0	0
ENSSSCT00000002426	ENSSSCG00000031517	-	AEMK02000182.1:45868-46807	939	0	0.00770634	0	0.104832	0.0564759	0.156856	0.00781668	0.027143	0.0225217	0	0	0
ENSSSCT00000002428	ENSSSCG00000039742	-	AEMK02000364.1:97188-98117	906	0	0	0	0	0	0	0.012256	0	0	0	0	0
ENSSSCT00000002430	ENSSSCG00000002175	-	7:79524950-79525886	936	0	0	0	0	0	0	0.0117714	0	0	0	0	0
ENSSSCT00000002437	ENSSSCG00000021523	-	7:79531067-79531982	915	0	0	0	0	0.0116653	0.0237095	0.0121065	0	0	0	0	0
ENSSSCT00000002439	ENSSSCG00000035754	-	7:79214270-79215218	948	0	0	0	0	0	0	0	0	0	0	0	0.0224852
ENSSSCT00000002443	ENSSSCG00000002188	-	7:79302532-79306110	948	0	0	0	0	0	0.0226219	0.0462345	0	0	0.0227322	0	0
ENSSSCT00000002444	ENSSSCG00000034430	-	7:79322715-79323651	936	0	0	0	0.0451058	0.158762	0	0	0	0	0	0	0
ENSSSCT00000002456	ENSSSCG00000034109	-	AEMK02000661.1:487052-487967	915	0.0236595	0	0.0236551	0	0	0	0.0484258	0	0	0	0	0
ENSSSCT00000002457	ENSSSCG00000002202	-	AEMK02000410.1:221344-222292	948	0	0	0	0	0	0.0226837	0	0	0	0	0	0
ENSSSCT00000002490	ENSSSCG00000002235	LPCAT4	7:80140652-80152314	2311	0.0303781	0.0310319	5.98642e-06	0.266286	0.0931872	0.159313	0.122912	0.0469114	0.118309	0.0389166	3.76101e-07	1.44111e-06
ENSSSCT00000002496	ENSSSCG00000002241	NUTM1	7:80149850-80159334	3360	0.00558403	0	0.0109937	0	0.0215116	0.0163487	0.011225	0.00558678	0.021475	0	0.0221953	0
ENSSSCT00000002498	ENSSSCG00000002243	SLC12A6	7:80191833-80263345	3445	5.24994e-22	0.0317253	0.312692	0.386336	0.398601	6.5385e-17	0.0713842	0.111719	0.0606169	6.82411e-09	0.13009	4.70239e-38
ENSSSCT00000002500	ENSSSCG00000002245	KATNBL1	7:80287645-80350165	4271	0.399897	0.543777	0.974547	3.8773	2.48266	2.21463	1.76723	1.57707	1.42503	0.214671	0.276324	0.368412
ENSSSCT00000002508	ENSSSCG00000002252	ARRDC4	7:81656765-81669590	4201	0.561593	1.14654	5.15314	4.94689	7.45867	3.88607	4.76352	1.04755	1.51565	0.54374	0.931199	0.93035
ENSSSCT00000002510	ENSSSCG00000002254	NR2F2	7:83076121-83083082	3984	0.210348	0.236669	0.187407	0.451979	0.675292	0.55143	0.427729	0.380358	0.467398	0.124723	0.0972013	0.155362
ENSSSCT00000002511	ENSSSCG00000002254	NR2F2	7:83077506-83084256	2446	0.429912	0.384901	0.431704	0.631722	0.603099	0.770233	0.658446	0.295524	0.50454	0.216119	0.266765	0.303281
ENSSSCT00000002514	ENSSSCG00000002257	MCTP2	7:84727103-84962894	3062	6.4717e-08	0.00013573	1.71973e-30	0.351724	1.96579e-25	1.66889e-12	8.49588e-25	0.0598203	1.211e-07	4.59622e-10	4.96741e-25	0.027339
ENSSSCT00000002515	ENSSSCG00000002258	KLHL25	7:88262923-88264691	1707	0.473526	0.198032	0.811337	0.279389	0.504423	1.01188	1.59977	1.13784	1.48764	0.279171	0.402462	0.494175
ENSSSCT00000002516	ENSSSCG00000002259	-	7:88105683-88219075	5736	2.54778	3.10077	5.85273	7.61894	6.37245	5.12101	4.16152	3.53626	2.94635	1.05312	1.68332	2.0874
ENSSSCT00000002517	ENSSSCG00000002260	-	7:88018249-88046066	699	1.92183	1.03176	3.93827	5.64598	5.12879	3.63377	3.18401	2.84991	2.73579	0.408192	1.41296	1.62822
ENSSSCT00000002519	ENSSSCG00000002262	SV2B	7:87569080-87766206	6203	0	0.0127518	0.0153903	0.0685229	0.0312204	0.0488736	4.45255e-07	0	0.00566704	0	0	0.00589853
ENSSSCT00000002520	ENSSSCG00000002263	SLCO3A1	7:86788189-87103823	2847	0.00328238	0.0138999	0.227914	0.204106	7.20928e-07	0.18109	0.135547	0.00198304	0.613756	0.0749714	0.250477	0.170378
ENSSSCT00000002523	ENSSSCG00000002265	FAM174B	7:86269051-86289228	540	0.422886	0.047332	0.911002	1.37074	2.00777	1.65823	2.56047	0.82651	0.5232	0.0943081	0.189315	0.555394
ENSSSCT00000002524	ENSSSCG00000002266	-	7:85983892-86106935	5336	3.49716e-06	6.45456e-05	0.00357211	2.66298e-08	1.26723e-06	1.88197e-06	6.90029e-05	3.28556e-05	0.00136929	4.96466e-15	0.00012016	1.20839e-21
ENSSSCT00000002525	ENSSSCG00000002267	RGMA	7:85921587-85968882	3357	2.40168	1.36334	3.88346	3.48564	3.45777	4.47736	3.58616	1.88449	2.58366	0.781275	1.29701	1.27645
ENSSSCT00000002526	ENSSSCG00000002268	AKAP5	7:88538983-88547392	4390	0.143631	0.127859	0.232605	0.466405	0.324909	0.596621	0.606358	0.523518	0.709602	0.0681256	0.130074	0.109525
ENSSSCT00000002527	ENSSSCG00000002269	MTHFD1	7:88471373-88537389	7045	0.428254	0.63896	1.5622	1.71636	2.45022	2.97102	3.76628	3.23561	1.84241	0.947154	1.83454	1.15485
ENSSSCT00000002528	ENSSSCG00000002270	-	7:88416029-88458304	1545	0	1.2174e-05	0	0	0	0	4.5998e-08	0	0	0	0	0
ENSSSCT00000002532	ENSSSCG00000002274	HSPA2	7:88607554-88609464	1890	0.640332	0.281269	0.867682	0.958127	0.820654	0.923548	0.959515	0.456387	0.44943	0.0208064	0.318639	0.33926
ENSSSCT00000002533	ENSSSCG00000002275	PPP1R36	7:88614872-88652441	1886	0.0103519	0.0626491	0.133015	0.200077	0.20063	0.315355	0.177717	0.12476	0.120129	0.0312818	0.0618155	0.0309131
ENSSSCT00000002534	ENSSSCG00000002276	PLEKHG3	7:88764489-88810993	4644	0.23645	0.130407	0.361295	1.1	0.816179	1.43922	1.93106	0.826542	0.490523	0.0214654	0.227675	0.207811
ENSSSCT00000002535	ENSSSCG00000002277	SPTB	7:88812717-88868442	9125	21.8731	11.0836	28.3774	14.4702	12.8974	13.4225	4.83858	9.94809	12.9514	3.26945	4.6656	4.5765
ENSSSCT00000002537	ENSSSCG00000002279	GPX2	7:89007369-89011620	1065	2.36874	1.37336	0.5704	0.346868	1.9752	0.96367	1.5695	0.45944	5.34906	0.13905	0.315293	0.431108
ENSSSCT00000002538	ENSSSCG00000002280	RAB15	7:89017538-89039980	1037	2.42953e-07	0.0321497	2.94177e-07	1.85143e-06	1.0971e-05	0.00111595	5.37724e-06	2.36699e-05	0	0.058535	0	0
ENSSSCT00000002539	ENSSSCG00000002281	FNTB	7:89052506-89131074	2841	1.21301	1.10938	2.52168	5.45308	4.36449	3.64165	1.64298	1.24803	1.75166	0.382809	0.834773	0.777038
ENSSSCT00000002542	ENSSSCG00000002283	FUT8	7:89395633-89680568	2954	0.250671	0.404437	1.25533	2.13181	3.22563	3.20265	2.14705	1.23787	0.996114	0.119051	0.501835	0.345821
ENSSSCT00000002545	ENSSSCG00000002285	GPHN	7:90346736-90913620	3458	0.151478	0.376747	0.430917	1.49236	1.91992	2.10183	0.788395	0.915649	0.652968	0.499447	0.612345	0.417948
ENSSSCT00000002546	ENSSSCG00000002286	FAM71D	7:90933999-90944193	1191	0.121295	0.192209	0.292911	0.0337438	0.271122	0.18923	0.105725	0.122507	0.0338021	0.0174417	0.0691388	0.0172137
ENSSSCT00000002548	ENSSSCG00000002287	MPP5	7:90955679-91055598	4760	0.539011	0.394027	0.821763	0.619808	0.483537	1.1577	0.458123	0.496488	9.14478e-06	0.150241	0.366084	0.178788
ENSSSCT00000002551	ENSSSCG00000002290	PLEK2	7:91109454-91133202	2776	0.0478132	0.0206715	0.141351	0.236734	0.138367	0.166951	0.10998	0.116291	0.177581	0.0275307	0.047531	0.0340301
ENSSSCT00000002553	ENSSSCG00000002292	PLEKHH1	7:91257324-91304996	4050	0.358303	0.134397	0.885546	0.352951	0.128134	0.286504	0.0738005	0.0275535	0.0926357	0.0092596	0.0410687	0.0961832
ENSSSCT00000002555	ENSSSCG00000002294	ARG2	7:91343987-91385910	1447	0.888439	0.714011	9.78813	0.036644	0.143305	0.251648	46.4778	14.6393	17.8362	2.72074	6.29875	3.72374
ENSSSCT00000002556	ENSSSCG00000002295	VTI1B	7:91381643-91413884	5571	0.934598	0.603076	3.80915	1.86879	1.73783	1.81498	7.63708	4.69975	5.85145	0.958725	1.60681	1.13314
ENSSSCT00000002557	ENSSSCG00000002296	RDH11	7:91414947-91452535	2946	0.153929	0.207046	0.821348	1.10478	1.26763	1.74844	2.76133	1.2136	0.87652	0.310225	0.357	0.230096
ENSSSCT00000002558	ENSSSCG00000002297	RDH12	7:91481216-91493306	1524	0	0	0.0519092	0	0.0382158	0.0129236	0.0530555	0.0131844	0.0127096	0	0	0
ENSSSCT00000002559	ENSSSCG00000002298	ZFYVE26	7:91520571-91590449	7625	0.722937	0.521695	1.64739	1.04365	0.964322	0.939489	0.870644	0.986619	1.17155	0.255801	0.686741	0.67112
ENSSSCT00000002567	ENSSSCG00000002305	EXD2	7:92848095-92909058	4982	0.188581	0.146918	0.336192	0.199664	0.418201	0.390888	0.273938	0.200915	0.501047	0.0518884	0.0682959	0.103133
ENSSSCT00000002568	ENSSSCG00000002306	GALNT16	7:92929068-93041441	4095	1.64388	0.815487	2.7378	1.775	2.99616	1.3585	1.49553	1.11673	1.016	0.416496	0.82099	1.22705
ENSSSCT00000002569	ENSSSCG00000002307	ERH	7:93068183-93083937	842	2.95956	2.0858	13.6466	11.7158	12.0756	14.7269	17.5742	9.88469	10.1504	1.8174	3.642	3.63328
ENSSSCT00000002571	ENSSSCG00000002309	PLEKHD1	7:93152945-93187598	3323	0.0451947	0.00569916	0.0556144	0.00574715	0.0108825	0.122107	0.0573645	0.0682152	0.000649891	1.85589e-06	0.0449107	0.045135
ENSSSCT00000002573	ENSSSCG00000002311	SUSD6	7:93253721-93344188	5110	0.53122	0.316635	1.96384	1.34443	1.4607	1.28086	1.43573	0.907005	1.15673	0.383562	0.727732	0.710682
ENSSSCT00000002574	ENSSSCG00000032583	SRSF5	7:93393445-93447648	1502	1.69549	1.63081	2.34782	14.7946	7.16251	5.82163	2.53932	1.5538	3.16314	0.821612	0.639966	0.649808
ENSSSCT00000002575	ENSSSCG00000002313	SLC10A1	7:93324365-93421776	3890	0.014372	0.043498	0.0518394	0.0322146	0.0184364	0.0140099	0.00481131	0.0191599	0.0138046	0.0289697	0.00951844	0.014329
ENSSSCT00000002576	ENSSSCG00000002314	SMOC1	7:93475972-93626283	1381	0.173011	0.0818435	0.20944	0.957325	0.333391	0.749603	0.782741	0.333469	0.331818	0.000498314	0.0689366	0.24692
ENSSSCT00000002577	ENSSSCG00000002315	SLC8A3	7:93643617-93795468	4578	0.434907	0.145823	0.113854	1.272	0.481721	0.380966	0.161381	7.72658e-05	0.456596	0.0585851	0.000650541	1.36342e-12
ENSSSCT00000002578	ENSSSCG00000002316	COX16	7:93861141-93882359	725	0.2845	0.191163	1.49576	1.96959	2.29971	2.82097	2.57632	1.938	2.00866	0.190637	0.792008	0.531664
ENSSSCT00000002579	ENSSSCG00000002317	-	7:93896209-93898402	2193	0.0703112	0.0687077	0.226284	0.17877	0.165035	0.0804274	0.0265854	0.210132	0.157644	0.0221358	0.0480843	0.0926308
ENSSSCT00000002583	ENSSSCG00000002321	-	7:94025654-94028015	2238	5.00732e-05	5.04358e-05	4.87753e-05	4.43699e-10	4.86777e-05	4.78348e-05	5.18286e-05	8.82956e-05	4.86137e-05	5.06019e-05	2.83478e-14	4.94347e-05
ENSSSCT00000002584	ENSSSCG00000002322	ADAM21	7:94084809-94086963	2154	0.00896077	0	0.0530782	0.0086466	0.0173356	0.00878793	0.00903663	0	0	0	0	0
ENSSSCT00000002588	ENSSSCG00000002326	-	7:94014153-94016388	2235	0.0947214	0.0195438	0.116147	0.0560656	0.0707684	0.0323558	0.0253193	0.15173	0.0844812	0.0187965	0.0321194	0.049311
ENSSSCT00000002591	ENSSSCG00000002329	MAP3K9	7:94302821-94378003	4196	3.16813e-36	0	4.81447e-107	0.00850084	0.0170284	0.0388224	5.27334e-09	4.52265e-10	5.11744e-21	1.41156e-54	0.0219873	2.83575e-15
ENSSSCT00000002592	ENSSSCG00000002329	MAP3K9	7:94302821-94380619	4757	0.0114862	0	0.0265756	1.43775e-06	1.46706e-06	3.25777e-07	0.042902	0.0231296	0.0334008	0.0194148	1.41265e-06	0.0192085
ENSSSCT00000002593	ENSSSCG00000002330	PCNX1	7:94445383-94617925	11816	0.345874	0.215875	0.413448	1.78929	1.51077	0.6893	0.464527	0.609447	1.14828	0.227535	0.313649	0.398404
ENSSSCT00000002595	ENSSSCG00000002332	SIPA1L1	7:95021371-95168721	7773	0.0269673	7.75878e-09	3.83792e-10	0.0524755	1.06253e-06	0.0196925	8.96682e-10	0.0415641	1.2499e-07	1.36794e-08	1.54124e-09	2.93972e-41
ENSSSCT00000002596	ENSSSCG00000002333	DPF3	7:96039143-96254290	1074	1.99066	0.594165	2.23385	0.916965	2.14036	2.18962	2.99815	4.18408	5.30032	0.800293	2.186	1.65902
ENSSSCT00000002600	ENSSSCG00000002337	ZFYVE1	7:96323260-96380291	4465	0.467724	0.366661	1.07927	1.51362	1.40275	1.33122	0.532977	1.06716	0.975029	0.395689	0.459681	0.409912
ENSSSCT00000002603	ENSSSCG00000002340	PSEN1	7:96478189-96568182	5352	1.01532	0.972279	2.4958	5.15037	5.0542	3.81731	2.60625	1.36643	1.53142	0.416312	0.550245	0.717456
ENSSSCT00000002605	ENSSSCG00000002341	PAPLN	7:96585206-96625053	6991	0.119826	0.0614658	0.217532	0.685392	0.514511	0.448983	1.45401	0.729273	0.464366	0.0886849	0.148124	0.24184
ENSSSCT00000002606	ENSSSCG00000022178	NUMB	7:96625638-96799975	2814	3.04004e-41	1.54853e-69	2.32996e-33	3.75171e-24	1.28767e-22	8.80601e-53	4.33077e-21	3.30273e-29	7.50597e-17	2.51355e-26	1.49879e-36	1.43731e-45
ENSSSCT00000002608	ENSSSCG00000002344	RIOX1	7:96823091-96831576	3490	0.901497	0.492628	1.50253	2.06836	1.82378	1.43968	1.06227	0.874946	1.80008	0.232539	0.474534	0.379788
ENSSSCT00000002610	ENSSSCG00000002346	PNMA1	7:97049955-97051017	1062	0.336687	0.359457	0.809155	1.83691	1.20471	1.02617	0.56532	0.460992	0.716929	0.0398604	0.197718	0.33423
ENSSSCT00000002612	ENSSSCG00000002348	-	7:96984541-96990397	1501	0.544029	0.163485	1.31804	1.30457	2.17634	1.83764	1.1875	0.75112	0.74354	0.212422	0.488874	0.359976
ENSSSCT00000002613	ENSSSCG00000002349	ACOT4	7:96941467-96948726	5128	0.0935567	0.0718872	0.175702	0.133174	0.177315	0.0983663	0.0345825	0.0123675	0.0283769	0.024401	0.00731328	0.0326544
ENSSSCT00000002614	ENSSSCG00000002350	ELMSAN1	7:97055797-97077034	3308	2.74163	2.33064	4.17988	2.66896	2.5478	2.45991	1.28379	1.40283	2.71264	0.388982	0.784048	1.12591
ENSSSCT00000002615	ENSSSCG00000002351	-	7:97174175-97195590	1589	2.26264	6.4194	19.0134	40.3063	46.2957	53.1486	12.8787	7.37525	9.11819	1.0328	1.92154	1.49238
ENSSSCT00000002616	ENSSSCG00000002352	ZNF410	7:97198030-97243761	2570	0.800906	0.580394	1.56695	2.70295	2.35709	1.73298	1.2905	1.19547	1.23218	0.459712	0.439312	0.512727
ENSSSCT00000002617	ENSSSCG00000002353	FAM161B	7:97244922-97258459	2888	0.275103	0.191623	0.580781	0.731275	0.52424	0.313664	0.329488	0.491878	0.718763	0.112206	0.234389	0.215396
ENSSSCT00000002618	ENSSSCG00000002354	COQ6	7:97258673-97271302	2480	1.47224	1.28181	6.08479	5.80579	6.33502	6.86352	4.19115	2.64747	3.90752	0.64767	1.01005	0.855182
ENSSSCT00000002619	ENSSSCG00000002355	ENTPD5	7:97272452-97296959	3467	1.45557e-08	5.62803e-09	4.57912e-26	0.0301901	1.1174e-12	1.18511e-33	3.53662e-13	5.42175e-25	6.08822e-12	5.09519e-10	1.05569e-07	1.12884e-09
ENSSSCT00000002620	ENSSSCG00000002356	BBOF1	7:97316767-97359907	1593	0	0.012575	0.0123459	0	0.0121154	0.0245802	0	0	0	0	0	0
ENSSSCT00000002621	ENSSSCG00000002357	ALDH6A1	7:97360539-97381889	4668	0.713509	0.68786	1.95612	6.95851	3.63059	5.00957	5.58082	6.15897	6.37107	1.59816	1.64167	2.18998
ENSSSCT00000002630	ENSSSCG00000002366	NPC2	7:97730515-97740331	1484	2.0781	2.4361	4.80119	11.7501	13.3665	8.8056	10.3344	4.40216	3.52386	1.3724	1.93589	2.79138
ENSSSCT00000002631	ENSSSCG00000002367	ISCA2	7:97739899-97743911	1139	0.364958	0.239209	0.835329	1.13827	0.875455	0.852615	1.07727	0.793091	0.588016	0.257125	0.0910397	0.199352
ENSSSCT00000002632	ENSSSCG00000002368	LTBP2	7:97746111-97852462	7667	0.10713	4.96399e-06	0.143428	0.13631	0.0636609	0.188032	0.275951	0.180313	0.112657	0.000114342	0.000112914	0.141665
ENSSSCT00000002634	ENSSSCG00000002370	AREL1	7:97893188-97940898	5938	0.125624	0.11391	1.55602e-05	0.0250688	0.0357598	0.0133412	0.112224	0.356021	0.204357	0.0944468	0.0706463	0.0161112
ENSSSCT00000002636	ENSSSCG00000002372	YLPM1	7:97976136-98042230	7079	0.458146	0.303907	0.898517	1.55443	1.38012	1.41292	0.768695	1.05426	1.2989	0.377508	0.424634	0.574298
ENSSSCT00000002638	ENSSSCG00000002373	PROX2	7:98065527-98074822	1761	0	0	0	0.0107942	0.0108259	0	0	0	0.0216058	0	0	0
ENSSSCT00000002639	ENSSSCG00000002374	DLST	7:98090812-98112213	3838	3.7944	2.85753	7.52305	5.78768	6.30611	6.23315	3.53287	2.57472	4.09759	1.42488	2.75117	1.92297
ENSSSCT00000002640	ENSSSCG00000002375	RPS6KL1	7:98109891-98131802	6130	0.00216369	8.82718e-05	8.87108e-05	8.56281e-05	8.68178e-05	8.77817e-05	0.551506	8.79067e-05	8.44902e-05	8.61163e-05	8.72809e-05	8.68383e-05
ENSSSCT00000002642	ENSSSCG00000002376	PGF	7:98155571-98162390	492	0.268864	0.162463	0.441601	0.381493	0.496875	0.451148	0.62415	0.279726	0.548983	0.0539266	0.16285	0.158594
ENSSSCT00000002643	ENSSSCG00000002377	EIF2B2	7:98203814-98210407	1560	2.2716	1.76336	4.4872	7.49309	8.83429	7.34973	7.07475	3.737	4.39052	0.912464	1.75412	1.5995
ENSSSCT00000002644	ENSSSCG00000002378	MLH3	7:98220554-98245330	4200	0.162006	0.156999	0.145315	0.111994	0.0762344	0.000129269	0.299447	0.247253	7.13707e-11	4.31782e-05	0.000120172	5.18216e-13
ENSSSCT00000002646	ENSSSCG00000002379	-	7:98249702-98265153	848	0.348296	0.728968	2.17682	2.9354	3.66055	2.64812	3.44597	2.06829	1.08616	0.600533	0.27803	0.463095
ENSSSCT00000002647	ENSSSCG00000002380	ZC2HC1C	7:98265273-98273351	2810	0.0539424	0.00680211	0.0493879	0.031759	0.0520274	0.0302497	0.0164334	0.0328504	0.01576	0.00679444	0	0.0134355
ENSSSCT00000002648	ENSSSCG00000002381	NEK9	7:98275978-98322250	6560	3.43156	2.2227	7.33493	9.53917	8.52594	8.19078	6.3082	7.96054	8.65235	1.85767	3.67294	3.39821
ENSSSCT00000002650	ENSSSCG00000002383	FOS	7:98449507-98453576	2748	1.87798	2.18045	6.32283	6.64416	3.65013	5.25228	11.0483	1.96388	0.351084	3.42288	2.52732	1.74936
ENSSSCT00000002651	ENSSSCG00000025984	TTLL5	7:98823900-99058694	3858	0.232212	0.199145	0.413849	0.64173	0.73173	0.707223	0.361725	0.355678	0.322995	0.069042	0.25882	0.0969283
ENSSSCT00000002652	ENSSSCG00000002385	TGFB3	7:99133510-99153979	3730	0.086185	0.0169836	0.0568377	0.103599	0.0314509	0.0833847	0.0285057	0.0449231	0.0643799	0.0326381	0.0758991	0.0701998
ENSSSCT00000002653	ENSSSCG00000002386	IFT43	7:99158552-99254302	988	0.431488	0.195772	1.24883	1.49837	2.1216	1.6596	1.36603	0.481031	0.803843	0.151948	0.237057	0.214061
ENSSSCT00000002654	ENSSSCG00000002387	GPATCH2L	7:99325601-99375179	2814	0.290696	0.106244	0.675583	0.103769	0.247529	4.06679e-27	0.0666803	0.024588	0.047398	1.3826e-20	0.0961652	0.0931028
ENSSSCT00000002655	ENSSSCG00000002388	ESRRB	7:99581145-99699775	4950	0.198561	0.102403	0.433084	0.128455	0.240039	0.213002	0.128095	0.0807798	0.136654	0.0397625	5.63919e-06	0.0447374
ENSSSCT00000002656	ENSSSCG00000002389	VASH1	7:99910939-99929766	6450	0.294745	0.028026	0.510359	0.6942	0.966646	1.14611	1.81223	0.886796	0.195216	0.139045	0.539001	0.767578
ENSSSCT00000002657	ENSSSCG00000002390	ANGEL1	7:99935141-99959567	2226	0.838908	0.383855	1.89496	1.59342	1.54704	1.30559	1.76997	0.876084	1.26862	0.191687	0.473142	0.353136
ENSSSCT00000002660	ENSSSCG00000002392	IRF2BPL	7:100120138-100122489	2319	1.63949	2.44298	5.57698	3.18388	3.00733	3.25901	3.019	0.556667	3.66463	0.510566	0.666652	0.76655
ENSSSCT00000002664	ENSSSCG00000002396	GSTZ1	7:100392212-100404023	2335	0.960718	0.433662	3.77141	0.499571	1.1345	1.0438	2.95177	1.47746	1.89762	0.31467	0.619639	0.441101
ENSSSCT00000002665	ENSSSCG00000002397	POMT2	7:100348884-100392133	6755	0.299375	0.131447	0.749431	0.564463	0.551559	0.536667	0.333707	0.418835	0.504695	0.105301	0.139615	0.145373
ENSSSCT00000002666	ENSSSCG00000002398	TMEM63C	7:100263559-100334297	5635	0	0	0	0	0	0.000180342	0	0	0	0	0	0.000201371
ENSSSCT00000002668	ENSSSCG00000002400	SAMD15	7:100449596-100463614	1830	0.00530626	0	0	0.0620556	5.43394e-07	0.00377904	0.00535896	0.0214963	0.00513409	0	0	0
ENSSSCT00000002672	ENSSSCG00000002403	VIPAS39	7:100482956-100510099	2437	0.199622	0.382985	1.09242	1.69358	1.46613	1.11008	1.16201	0.661328	0.734171	0.125827	0.422155	0.321915
ENSSSCT00000002673	ENSSSCG00000002404	SPTLC2	7:100544478-100638978	6652	0.289219	0.408653	0.771195	1.02595	0.663604	0.848996	0.76352	0.43485	0.290399	0.246843	0.186353	0.200412
ENSSSCT00000002674	ENSSSCG00000002405	-	7:100525780-100526377	597	0	0.041172	0.0414743	0	0	0	0	0.0420712	0	0	0	0
ENSSSCT00000002675	ENSSSCG00000002406	AHSA1	7:100510225-100522161	3579	2.28236	2.85048	8.44645	3.36712	3.03461	2.86503	3.26886	2.57191	2.51638	1.05871	2.18156	1.55782
ENSSSCT00000002677	ENSSSCG00000002408	ADCK1	7:100777133-100901052	1616	8.37691e-06	0.00370739	0.0387121	5.66777e-06	1.25477e-05	3.64884e-08	0.0158795	3.82277e-06	1.90262e-06	0.0747846	1.17899e-17	0.063259
ENSSSCT00000002679	ENSSSCG00000002410	CEP128	7:103562230-103757966	3183	1.13852e-05	0.085148	4.88307e-07	1.70509e-05	3.89869e-05	0.134734	0.140435	0.32786	2.1938e-14	1.36083e-08	1.81625e-06	1.55091e-05
ENSSSCT00000002680	ENSSSCG00000002411	GTF2A1	7:103963244-104009302	6257	0.536357	0.49679	1.12123	2.60389	2.55146	2.56447	1.80843	1.74691	1.73587	0.319085	0.381199	0.350846
ENSSSCT00000002681	ENSSSCG00000002412	STON2	7:104039954-104190377	3696	0.421954	0.922097	1.35943	0.152705	1.06615	0.867531	0.759179	0.396644	0.724744	0.261823	0.455339	0.432396
ENSSSCT00000002683	ENSSSCG00000002414	SEL1L	7:104219630-104283178	6454	1.55435	0.921066	4.3697	4.56777	3.8021	3.38496	2.8416	2.23906	4.59714	0.510721	1.01358	0.887976
ENSSSCT00000002692	ENSSSCG00000002423	KCNK10	7:110122506-110269650	1737	0	0	0.0336229	0	0	0	0	0	0	0	0	0
ENSSSCT00000002693	ENSSSCG00000002424	SPATA7	7:110309461-110364033	2006	0.232249	0.167338	0.379241	0.883457	0.994866	1.057	0.53988	0.429938	0.29329	0.0439976	0.13567	0.22101
ENSSSCT00000002694	ENSSSCG00000002425	PTPN21	7:110377095-110449557	3525	2.44271	2.26074	4.40848	4.29251	3.13902	4.14425	2.60387	3.8191	4.33313	1.27369	2.33209	2.19682
ENSSSCT00000002695	ENSSSCG00000002426	ZC3H14	7:110463561-110513256	2781	0.613461	0.353647	1.84367	2.76593	3.31448	2.69726	2.7476	1.70194	1.62702	0.37016	0.482634	0.427719
ENSSSCT00000002696	ENSSSCG00000002427	EML5	7:110513671-110705002	5877	0.0812686	0.0662257	0.208792	0.10191	0.0780209	0.0820706	0.0282063	0.0998756	0.0569289	0.0126032	0.0217246	0.0280608
ENSSSCT00000002697	ENSSSCG00000002428	TTC8	7:110731667-110784853	3029	0.0120989	0.0121781	0.0591239	0.0595766	0.125328	0.0345011	0.106286	0.0120573	0.011573	4.51116e-23	0.0236015	0.0239309
ENSSSCT00000002698	ENSSSCG00000002429	FOXN3	7:111041500-111453936	3223	0.84495	0.834018	0.7861	0.000374297	0.0733501	9.68426e-31	0.749539	9.50776e-14	7.58702e-05	0.000251918	0.195274	3.16287e-10
ENSSSCT00000002700	ENSSSCG00000002430	EFCAB11	7:111577723-111766344	709	0.487966	0.393429	2.36	1.99679	1.623	1.94909	1.31011	0.532242	0.355691	0.228855	0.35873	0.193049
ENSSSCT00000002701	ENSSSCG00000002431	TDP1	7:111767428-111854907	4183	0.0399752	0.0448037	0.161621	0.24312	0.234927	0.44142	0.119517	3.87196e-05	0.110878	0.0581783	0.10589	0.0797201
ENSSSCT00000002702	ENSSSCG00000002432	KCNK13	7:111866982-111980485	1995	0.0486854	0	0.0288575	0.0564211	0.0754255	0.143401	0.619105	0.439847	0.244638	0.0980861	0.203464	0.358682
ENSSSCT00000002703	ENSSSCG00000002433	PSMC1	7:112027865-112045308	5541	1.92611	0.954888	3.55964	5.43388	5.04814	4.14454	3.63675	2.76265	3.25414	0.559026	0.995847	1.02352
ENSSSCT00000002704	ENSSSCG00000002434	NRDE2	7:112039779-112090542	6665	0.637325	0.554328	1.42707	2.09603	1.63434	1.65006	0.864559	1.07495	1.45029	0.288001	0.414542	0.49603
ENSSSCT00000002706	ENSSSCG00000002436	TTC7B	7:112268300-112519208	5304	0.235644	0.268294	0.361681	0.648748	0.818695	0.392884	0.804263	0.322125	0.557813	0.220206	0.162671	0.251635
ENSSSCT00000002707	ENSSSCG00000024377	RPS6KA5	7:112563600-112753617	2855	0.117877	0.0742467	0.071003	8.87889e-05	0.0870848	6.8376e-05	0.0810333	6.34635e-12	0.00177027	0.00383503	0.0259666	0.00404641
ENSSSCT00000002708	ENSSSCG00000002438	-	7:112831658-112872994	1647	0.0240304	1.73845e-09	0.0138129	1.41557e-70	0	0	2.24317e-09	0	0	0	0	0
ENSSSCT00000002710	ENSSSCG00000002440	-	7:112918534-112992186	5745	1.55278	0.629283	2.61026	1.03052	1.06653	1.38303	1.91532	1.80329	3.07837	1.06312	1.48037	1.72635
ENSSSCT00000002711	ENSSSCG00000002441	PPP4R3A	7:113111302-113148986	5126	1.7547	1.65832	4.1801	6.60039	6.66309	6.43086	4.43964	4.1749	5.71102	1.03896	1.42603	1.4057
ENSSSCT00000002713	ENSSSCG00000002443	TC2N	7:113337824-113392337	4054	0.0178023	0.0364922	0.0491074	0.0020334	0.560043	0.151535	6.68972e-05	2.95366e-06	0.030321	0.00397358	0	0
ENSSSCT00000002714	ENSSSCG00000002444	FBLN5	7:113423631-113511491	2463	0.699546	1.99005	2.88448	8.55495	8.2399	6.98866	3.38323	1.24344	0.787689	0.403764	0.707692	0.905732
ENSSSCT00000002715	ENSSSCG00000002445	TRIP11	7:113527468-113597925	6067	0.194244	0.405326	0.539671	1.51739	1.60844	0.881363	0.888059	1.69942	2.50154	0.216567	0.302183	0.0932006
ENSSSCT00000002716	ENSSSCG00000002446	ATXN3	7:113608780-113645844	5557	0.360903	0.377483	1.15482	2.94703	2.78681	2.62811	1.84285	0.886182	1.13651	0.20359	0.305758	0.35007
ENSSSCT00000002717	ENSSSCG00000002447	CPSF2	7:113659451-113691241	4180	0.403148	0.399927	2.85864	3.03788	3.57099	3.83297	4.4	3.10544	3.35546	0.402335	0.877278	0.550547
ENSSSCT00000002719	ENSSSCG00000002449	-	7:113652773-113659672	347	22.4835	27.401	107.002	180.153	233.178	276.342	274.878	131.299	108.914	29.3081	42.4857	34.3556
ENSSSCT00000002720	ENSSSCG00000002450	SLC24A4	7:113836229-114014949	9262	0.00588994	0.00792366	0.046241	0.0188035	0.0094102	0.0266849	0.0353931	0.0117516	0.0338283	0.0138551	0.021435	0.0568123
ENSSSCT00000002721	ENSSSCG00000002451	RIN3	7:114035412-114166547	3549	0.731824	0.298297	0.877123	0.56764	0.386922	0.469746	1.21013	0.287181	0.340166	0.19709	0.226808	0.476247
ENSSSCT00000002722	ENSSSCG00000002452	LGMN	7:114175182-114210028	3096	0.0797567	5.51229e-30	0.0314917	0.0153576	0.092222	0.0772153	0.0321191	9.44452e-28	0.0460805	0.0161264	0.015834	0.0319008
ENSSSCT00000002723	ENSSSCG00000002452	LGMN	7:114176226-114210039	1857	1.17439	0.914274	1.6496	1.94934	2.15485	3.6439	1.61948	0.842328	5.41295e-05	0.59833	0.712156	2.50769
ENSSSCT00000002725	ENSSSCG00000002455	GOLGA5	7:114238769-114273526	2409	0.458301	0.763974	1.56341	4.45766	3.39557	2.288	1.53038	0.944321	0.855001	0.179527	0.422587	0.349839
ENSSSCT00000002726	ENSSSCG00000002456	CHGA	7:114345090-114358571	2891	0.0392572	0	0.051568	0.00629712	0.0630915	0.0191826	0.0197474	0.0262045	0.0503837	0	0.0455255	0.0326
ENSSSCT00000002728	ENSSSCG00000002457	ITPK1	7:114363705-114520179	1393	4.79767e-17	1.72522e-58	0.0332049	2.7366e-14	2.6423e-30	8.89592e-09	0.0401747	0.0507514	5.9171e-06	5.19145e-31	0.0225372	6.20504e-22
ENSSSCT00000002729	ENSSSCG00000002458	TMEM251	7:114574138-114575889	1316	0.231821	0.374056	1.22742	2.43285	2.97004	1.95853	1.83533	1.0754	1.38362	0.233388	0.462203	0.491558
ENSSSCT00000002730	ENSSSCG00000002459	GON7	7:114586305-114590804	600	1.82632	1.88103	6.87733	12.1209	9.00592	11.3891	8.40848	5.26366	7.82451	1.01888	1.95811	1.80223
ENSSSCT00000002731	ENSSSCG00000002460	UBR7	7:114590944-114609858	3403	0.542746	0.352643	1.36231	2.1088	2.04208	1.91511	1.58279	0.832884	1.06627	0.202611	0.413302	0.365062
ENSSSCT00000002732	ENSSSCG00000002461	BTBD7	7:114619395-114707051	6259	1.39759	1.17653	3.02157	3.05061	2.81778	2.86841	2.70808	2.44252	2.74335	0.658635	0.962866	0.850523
ENSSSCT00000002736	ENSSSCG00000002464	PRIMA1	7:115038478-115100924	4200	0.0884618	0.107096	0.113093	0.259086	0.12335	0.228396	0.0399649	0.0132635	0.101918	0.0490379	0.0351483	0.0617446
ENSSSCT00000002739	ENSSSCG00000002467	ASB2	7:115210891-115258654	2539	6.98	6.20506	6.99011	3.59604	5.45786	9.7462	19.0506	12.8485	11.9508	3.91893	7.93885	8.32021
ENSSSCT00000002741	ENSSSCG00000002469	OTUB2	7:115304814-115326047	3447	0.135906	0.093233	0.353146	0.527813	0.476346	0.387208	0.32779	0.15771	0.198578	0.0273929	0.0972307	0.0867037
ENSSSCT00000002742	ENSSSCG00000002470	DDX24	7:115328118-115348745	2964	1.61861	1.125	4.15266	7.9699	6.21012	5.10502	4.57881	2.43673	4.35425	0.757741	1.10517	1.32998
ENSSSCT00000002743	ENSSSCG00000035297	ISG12(A)	7:115356616-115361534	677	1.20423	0.369473	3.44276	29.8852	76.7232	18.5979	49.8559	4.93933	18.7812	7.00091	3.97659	18.2199
ENSSSCT00000002745	ENSSSCG00000002472	-	7:115367849-115369991	243	1.87585	0.626251	1.1913	10.5793	5.4719	5.50371	3.98272	0.949539	1.72197	0.206276	1.31686	1.18495
ENSSSCT00000002748	ENSSSCG00000002474	PPP4R4	7:115472628-115522683	3390	0	3.86837e-14	0	0	0.00532759	0.016194	0.00983746	5.91682e-21	0.0106368	0	0	1.3665e-14
ENSSSCT00000002749	ENSSSCG00000002475	SERPINA6	7:115535553-115553040	2287	0	0	0	0	0	0.00412495	0	0	0	0	0	0
ENSSSCT00000002750	ENSSSCG00000002476	SERPINA1	7:115604298-115609726	1344	0.0150893	0.0152174	0.0898515	0	0.0294257	0.164244	0.734887	0.59329	0	0	0	0.104997
ENSSSCT00000002757	ENSSSCG00000002481	SERPINA5	7:115799414-115810991	2367	0	0	0	0	8.63625e-08	0.000492527	0	0	0	0	0	0
ENSSSCT00000002764	ENSSSCG00000030371	-	7:115850473-115972092	1730	0	0	0	0	0	0	2.86075e-10	0	0	0	0	0
ENSSSCT00000002768	ENSSSCG00000002490	GSC	7:116099046-116100966	1143	0.0363474	0.128281	0.108506	0.336523	0.124544	0.162585	0	0.0183679	0	0	0.0181334	0.0360992
ENSSSCT00000002772	ENSSSCG00000002494	CLMN	7:116476788-116590181	4212	0.286649	0.195762	0.507405	0.313366	0.169631	0.146082	0.225794	0.0749364	0.156655	0.0577824	0.0394246	0.0967403
ENSSSCT00000002773	ENSSSCG00000002495	SYNE3	7:116672602-116730027	2916	0.2807	2.80515e-27	1.01991	0.338256	5.1956e-14	0.0735946	0.368947	0.270027	0.39394	1.45671e-43	0.047221	2.301e-22
ENSSSCT00000002774	ENSSSCG00000002496	GLRX5	7:116787340-116797488	1056	4.62554	3.63872	13.6903	9.40311	14.1841	12.6373	8.63933	4.21751	4.50666	1.40443	2.34879	2.49373
ENSSSCT00000002779	ENSSSCG00000002501	BDKRB1	7:117491349-117492410	1061	0.0396542	0.0399839	0.0197577	0.096789	0.0583587	0.0395131	0.0606385	0	0	0	0	0
ENSSSCT00000002780	ENSSSCG00000002502	ATG2B	7:117508095-117586174	6132	0.219133	0.209751	0.176015	0.124864	2.3724e-05	0.0380259	0.0991134	0.0717973	0.000102673	0.0925754	0.0973789	0.222401
ENSSSCT00000002782	ENSSSCG00000002504	AK7	7:117609839-117667455	2847	0.0133	0	0.0131043	0.00640096	0.00641334	0	0.0133819	0.0133179	0.00640191	0	0	0
ENSSSCT00000002783	ENSSSCG00000002505	-	7:117676397-117741911	2767	1.26245	0.819967	3.82511	1.49296	1.5302	1.55119	1.36608	1.44866	0.872196	0.352852	0.830269	0.766783
ENSSSCT00000002784	ENSSSCG00000002506	VRK1	7:117942772-118025596	1587	1.62366e-07	0.0505106	0.123865	0.253544	0.38973	0.356966	0.273661	0.0858794	0.0768258	0.239566	5.19207e-06	1.33004e-06
ENSSSCT00000002785	ENSSSCG00000002507	BCL11B	7:120205007-120295737	2669	0	0	0.00701974	0.0205754	0.0137449	0.0139315	0.0358446	0.0428041	0.0548798	0	0.0283214	0.0922434
ENSSSCT00000002786	ENSSSCG00000002508	SETD3	7:120412548-120486591	2734	2.34787	1.77204	7.50546	8.87123	8.75212	6.86954	5.68177	4.97368	5.46716	1.8592	2.6441	2.55315
ENSSSCT00000002787	ENSSSCG00000002509	CCNK	7:120486731-120513217	2054	0.849042	0.561433	0.773322	1.59384	1.08658	1.29615	0.942295	0.558591	0.820146	0.332619	0.506849	0.535401
ENSSSCT00000002788	ENSSSCG00000002510	CYP46A1	7:120661110-120695043	2276	0	0.00851792	0.0166654	0	0.00816264	0.0165502	0	0	0	0	0	0
ENSSSCT00000002790	ENSSSCG00000002512	DEGS2	7:121056094-121076248	3394	0.0826772	0.0611096	0.11402	0.175106	0.180721	0.102252	0.210819	0.0992979	0.137919	0.0610498	0.0656845	0.0824142
ENSSSCT00000002793	ENSSSCG00000002515	SLC25A47	7:121192449-121210374	1548	0.231698	0.103859	0.433516	0.149678	0.112632	0.152352	0.15638	0.155449	0.324648	0.0388876	0.0512855	0.115234
ENSSSCT00000002794	ENSSSCG00000002516	WARS	7:121212980-121238106	1826	0.845638	0.108921	1.82778	0.711358	0.000369412	1.32137	0.273144	0.948998	1.60666	2.13791e-07	0.000247353	0.149829
ENSSSCT00000002795	ENSSSCG00000002517	WDR25	7:121238255-121384220	1848	0.418337	0.20556	0.744826	0.47538	0.319523	0.721178	0.836705	0.303152	0.816682	0.120325	0.354652	0.0176052
ENSSSCT00000002799	ENSSSCG00000002520	SLC25A29	7:121174888-121192328	5736	0.33818	0.24038	0.617148	0.627002	0.517286	0.405116	0.73925	0.489617	0.451311	0.11938	0.149468	0.241665
ENSSSCT00000002802	ENSSSCG00000002523	CDC42BPB	AEMK02000452.1:1650034-1752123	6340	1.58252	0.60387	2.42132	3.28915	2.71498	1.61937	1.6416	1.5841	2.00398	0.555675	0.718951	0.963357
ENSSSCT00000002805	ENSSSCG00000002526	RCOR1	AEMK02000452.1:1330769-1469632	5827	0.857695	0.51539	1.48377	1.35772	1.06564	1.2297	1.08132	0.837559	1.45396	0.378251	0.529127	0.607052
ENSSSCT00000002807	ENSSSCG00000002528	TECPR2	AEMK02000452.1:1174604-1254233	4080	1.19432	0.547271	2.57795	1.94819	2.05628	1.62582	2.15123	1.83646	1.70276	0.385928	0.674705	0.745405
ENSSSCT00000002808	ENSSSCG00000002529	-	AEMK02000452.1:1167882-1168227	345	9.86977	7.94017	29.2636	30.463	32.546	28.8085	22.9268	20.5819	22.7956	1.44251	5.17228	2.15212
ENSSSCT00000002809	ENSSSCG00000002530	CINP	AEMK02000452.1:1141193-1153145	943	1.80276	1.7952	6.62816	7.73623	7.15654	11.5286	12.9221	5.15589	6.24842	0.688526	1.73264	2.12701
ENSSSCT00000002810	ENSSSCG00000002531	MOK	AEMK02000452.1:1045932-1098921	1395	0.0460522	0.0233583	2.65593e-17	0.198254	0.275383	0.181248	0.00811227	4.92323e-06	1.17841e-39	0	1.30922e-35	5.991e-131
ENSSSCT00000002812	ENSSSCG00000002532	-	AEMK02000452.1:1125651-1137334	2561	0.610245	0.352841	1.68028	2.33006	2.31342	2.32308	2.55536	2.35634	2.70358	0.57738	1.02114	0.874862
ENSSSCT00000002813	ENSSSCG00000002533	WDR20	AEMK02000452.1:977312-1034923	2039	0.542615	0.679656	1.71378	1.95962	1.95821	1.41916	1.80376	1.14425	1.23373	0.205188	0.512717	0.396392
ENSSSCT00000002815	ENSSSCG00000002535	HSP90AA1	AEMK02000452.1:916988-922499	3049	58.4565	97.1154	136.377	52.8002	46.7458	56.817	37.2411	31.4601	32.3325	10.4989	24.9455	20.87
ENSSSCT00000002816	ENSSSCG00000002536	-	AEMK02000452.1:890191-894014	633	0.0755107	0.152179	0.0764308	0	0.189687	0.502369	0.0783891	0.232636	0.113329	0	0.151658	0
ENSSSCT00000002821	ENSSSCG00000002540	PPP2R5C	AEMK02000452.1:715079-797055	1503	1.79652	1.55471	4.49609	7.82656	8.89648	9.64352	8.1082	4.35106	4.91725	0.992895	1.8301	1.53448
ENSSSCT00000002822	ENSSSCG00000002541	-	AEMK02000452.1:733892-734406	438	0.128397	0.129262	0.199524	0.263244	0.0668309	0	0.0684584	0	0.199188	0	0.0650273	0.125859
ENSSSCT00000002825	ENSSSCG00000002544	PPP1R13B	AEMK02000452.1:2237704-2331416	4351	0.384997	0.222861	0.383433	0.886359	0.589492	0.609108	0.763607	0.388849	0.428992	0.207517	0.21017	0.236589
ENSSSCT00000002829	ENSSSCG00000002546	XRCC3	AEMK02000452.1:2217695-2229207	2500	0.855231	0.354332	1.75448	1.30233	1.05443	0.799752	0.561408	0.8188	1.44991	0.207731	0.485947	0.631373
ENSSSCT00000002830	ENSSSCG00000002547	KLC1	AEMK02000452.1:2164009-2219988	2034	1.0173	0.964186	2.03542	2.02779	2.10157	2.47469	2.07157	2.14985	2.30055	0.275106	0.957342	1.28989
ENSSSCT00000002833	ENSSSCG00000002550	-	AEMK02000452.1:2383281-2389269	540	38.5766	26.5532	174.529	185.711	187.058	247.564	173.866	68.7948	94.2236	12.1657	22.8124	25.2704
ENSSSCT00000002836	ENSSSCG00000002552	TDRD9	AEMK02000452.1:2394153-2478527	4155	0.0223645	0.0180504	0.0087978	0.00859077	0.0172065	0.021791	0.0224539	0.0134134	0	0	0	0
ENSSSCT00000002839	ENSSSCG00000002554	PLD4	AEMK02000452.1:3137040-3144117	1896	0.0308645	0.0207502	0.122067	0.558103	0.692546	0.459632	0.882178	0.194433	0.376046	0.207345	0.163244	0.791244
ENSSSCT00000002840	ENSSSCG00000002555	JAG2	AEMK02000452.1:3262094-3276823	4422	0.826136	0.428806	1.16885	0.261703	0.638662	0.866087	0.737751	0.483273	0.98358	0.059075	0.206227	0.496415
ENSSSCT00000002842	ENSSSCG00000002557	NUDT14	AEMK02000452.1:3289305-3296905	1122	1.81989	1.29206	4.84314	9.32461	21.0637	13.1322	3.6681	2.15909	4.49888	1.04664	1.38987	1.21713
ENSSSCT00000002843	ENSSSCG00000002558	CEP170B	AEMK02000452.1:3108920-3129326	4716	0.0962029	0.220288	0.361311	0.230659	0.258125	0.154811	0.0666949	0.0620984	0.106069	0.000247083	1.2946e-05	7.06348e-05
ENSSSCT00000002844	ENSSSCG00000002559	CDCA4	AEMK02000452.1:3187970-3188609	639	0.372827	0.262985	0.943035	2.52307	2.84534	2.05917	1.23793	0.191363	0.484658	0.0374518	0.336907	0.294605
ENSSSCT00000002847	ENSSSCG00000036968	-	7:79821605-79822541	936	0	0	0	0.00563823	0.0113402	0	0	0	0	0	0	0
ENSSSCT00000002850	ENSSSCG00000034613	-	7:79600763-79601696	933	0	0	0	0	0	0.0231387	0	0	0	0	0	0
ENSSSCT00000002853	ENSSSCG00000040427	-	AEMK02000253.1:62452-63409	957	0	0	0	0.0109722	0	0.0112096	0	0.0454613	0	0	0	0
ENSSSCT00000002856	ENSSSCG00000039773	-	AEMK02000410.1:44377-45302	879	0	0	0	0.000150864	0	0.000144154	0	0	0	0	0	0
ENSSSCT00000002857	ENSSSCG00000032675	-	7:79880228-79881167	939	0	0	0	0.0224639	0	0	0	0	0	0	0	0
ENSSSCT00000002858	ENSSSCG00000002573	-	7:121707340-121711414	4074	8.76341	2.28916	5.07626	2.8939	0.75967	3.16101	0.362146	0.301224	0.0832965	0.147246	0.299321	0.373273
ENSSSCT00000002863	ENSSSCG00000037356	-	AEMK02000412.1:46772-47799	879	0	0	0	0	0.0490733	0	0	0	0	0.0249877	0	0
ENSSSCT00000002883	ENSSSCG00000033073	-	AEMK02000410.1:248801-249746	945	0	0	0	0.0445761	0.0224126	0.0455465	0	0	0	0	0	0
ENSSSCT00000002884	ENSSSCG00000037414	-	7:79022309-79023267	933	0	0	0	0	0	0	0	0	0	0	0.0115474	0
ENSSSCT00000002887	ENSSSCG00000002600	-	7:78987649-78988581	932	0	0	0	0	0	0	0	0	0.0113658	0	0	0
ENSSSCT00000002892	ENSSSCG00000034005	-	AEMK02000661.1:325102-326050	948	0	0	0	0	0	0	0	0.0114975	0	0	0	0
ENSSSCT00000002895	ENSSSCG00000002608	-	7:78856610-78857570	960	0	0	0	0	0.0219802	0	0	0	0	0	0	0
ENSSSCT00000002897	ENSSSCG00000002610	-	7:78810437-78811403	966	0	0	0	0	0	0	0	0.0224724	0.0108734	0	0	0
ENSSSCT00000002900	ENSSSCG00000002613	-	7:78825437-78826370	933	0	0	0	0	0	0	0	0.0117247	0	0	0	0
ENSSSCT00000002905	ENSSSCG00000002618	-	7:78757246-78758175	929	0	0	0	0	0	0.0116316	0	0	0	0	0	0
ENSSSCT00000002907	ENSSSCG00000002620	EFHC1	7:46244921-46320257	2248	0.0897395	0.0991717	0.231164	0.606619	0.694309	0.795408	0.622325	0.101395	0.0555617	0.109703	0.124979	0.178655
ENSSSCT00000002909	ENSSSCG00000002622	TMEM14A	7:46509771-46517724	1269	0.0721906	0.070273	0.184894	0.748292	0.620082	0.836671	0.917373	0.63795	0.389002	1.44834e-06	0.0988205	0.0360861
ENSSSCT00000002915	ENSSSCG00000002627	GSTA4	7:46635903-46656452	1753	0.10896	0.0802156	0.67547	2.47652	1.57843	2.63537	0.801802	0.578803	0.187226	0.195874	0.111656	0.292731
ENSSSCT00000002916	ENSSSCG00000002628	ICK	7:46662257-46701044	1890	0.59902	0.687548	0.755394	1.43719	1.41113	0.943846	0.823931	0.46676	0.749051	0.22887	0.462541	0.277576
ENSSSCT00000002917	ENSSSCG00000002629	FBXO9	7:46723397-46748126	2379	1.67488	1.81949	6.48176	10.324	13.498	12.24	11.1799	7.22466	6.99641	1.5171	2.25024	2.10944
ENSSSCT00000002921	ENSSSCG00000002632	SLC28A1	7:52606448-52652954	3141	0.0419594	0	0.0059027	0.0115253	0.0120798	0.0175599	0.00602125	0.00599281	0	0.00603403	0.00595097	1.55581e-06
ENSSSCT00000002922	ENSSSCG00000002633	GAS8	6:86822-105993	4734	0.234405	0.212841	0.503073	0.764882	0.675791	0.51727	0.325373	0.257626	0.393591	0.0984445	0.12416	0.175323
ENSSSCT00000002924	ENSSSCG00000002635	SPIRE2	6:209017-243609	5453	0.646406	0.379078	1.32679	0.885818	0.908376	0.77269	0.331487	0.840691	1.09933	0.149602	0.324419	0.324441
ENSSSCT00000002927	ENSSSCG00000002637	-	6:112233-118086	480	0.0557864	0.0561783	0.172106	0.226661	0.11486	0.0586847	0.117972	0.0581342	0.0570977	0.0559347	0	0
ENSSSCT00000002929	ENSSSCG00000002639	TUBB3	6:168451-178462	2438	0.124455	0.100883	0.407443	0.0752191	0.0947043	0.0864003	0.104299	0.101549	0.0998204	0.0177816	0.0721506	0.0638098
ENSSSCT00000002930	ENSSSCG00000002640	DEF8	6:147136-167459	1862	1.63894e-15	2.28696e-13	0.0736871	0.252592	0.0497136	3.63239e-17	2.51465e-07	2.04032e-14	0.271487	0.000125791	4.94264e-29	0.0452516
ENSSSCT00000002932	ENSSSCG00000002642	CDH15	6:632774-652160	6187	0.0392958	2.30083e-06	2.85877e-06	0.0640476	0.133228	0.19094	0.466433	0.286567	0.0798381	0.179122	0.0845185	0.313649
ENSSSCT00000002935	ENSSSCG00000002645	GALNS	6:869232-890136	2456	0.627743	0.544423	1.71914	2.48639	2.32189	1.53368	2.46506	0.903203	1.14163	0.181193	0.408596	0.40906
ENSSSCT00000002936	ENSSSCG00000002646	TRAPPC2L	6:865500-868952	1081	2.34128	1.13029	5.12475	10.5159	7.33695	7.45716	5.09039	3.80522	4.8405	0.784407	1.60109	1.72543
ENSSSCT00000002938	ENSSSCG00000002648	CBFA2T3	6:830825-852821	1893	2.69087	1.39345	2.98567	1.59402	1.63837	2.03632	1.03066	0.683327	0.976988	0.342649	0.800287	0.820969
ENSSSCT00000002941	ENSSSCG00000002650	APRT	6:890902-893277	869	1.58721	0.685758	4.71665	2.89479	2.5143	2.10029	2.47901	1.2036	2.15881	0.253391	0.831463	0.699197
ENSSSCT00000002942	ENSSSCG00000002651	CDT1	6:893380-897266	2102	0.0321023	0.018561	0.172616	0.239759	0.373909	0.67697	0.49188	0.0738551	0.0310716	0.0648812	0.228835	0.293136
ENSSSCT00000002943	ENSSSCG00000002652	KLHDC4	6:1627029-1677130	5868	1.03937	0.729631	2.49101	1.96036	1.45469	1.71708	1.39371	1.34107	1.83061	0.347134	0.683852	0.833782
ENSSSCT00000002944	ENSSSCG00000002653	JPH3	6:1678397-1766559	2187	0.052889	0.000262587	0.130518	0.0850438	0.0255747	0.000264489	1.64718e-07	0.0707369	0.13613	0.00888051	0.0526112	0.000289331
ENSSSCT00000002945	ENSSSCG00000002654	FBXO31	6:1949260-1991692	1572	4.03152	2.69158	9.32133	10.5466	9.22631	7.28041	5.12557	5.15306	6.70335	1.44697	2.04811	3.38877
ENSSSCT00000002946	ENSSSCG00000002655	MAP1LC3B	6:1917492-1941079	4006	1.95658	2.15422	3.67531	12.8467	10.4777	9.14663	5.71479	3.94067	4.85853	1.08604	1.43411	1.44558
ENSSSCT00000002947	ENSSSCG00000002656	ZCCHC14	6:1849978-1914668	3261	0.726494	0.278185	0.874783	0.158635	0.116885	0.139043	0.189402	0.326546	0.185417	0.143018	0.47322	0.394433
ENSSSCT00000002948	ENSSSCG00000002657	-	6:2001722-2011713	591	0.0828634	0	0.462795	0.165691	0.0418378	0.0852874	0.0863452	0.0426762	0.0416474	0	0.12497	0.0408752
ENSSSCT00000002949	ENSSSCG00000002658	FOXL1	6:2542674-2543691	1017	0	0.0420345	0.0623701	0.0407476	0.143351	0.104009	0.10636	0	0.0204197	0	0	0.0206864
ENSSSCT00000002951	ENSSSCG00000002660	MTHFSD	6:2561222-2580461	1319	0.409519	0.338076	0.754466	1.69895	1.67847	1.57025	1.1509	0.902265	1.16477	0.152634	0.250448	0.385865
ENSSSCT00000002953	ENSSSCG00000002662	C16orf74	6:3205945-3210734	192	0	0	1.08378	0.558112	0	0	0	0	0	0	0	0
ENSSSCT00000002955	ENSSSCG00000002664	GSE1	6:3246852-3349122	5154	1.17649	0.331963	0.771596	1.08947	0.613118	0.821408	0.457248	0.615957	0.408804	0.286907	0.246007	0.721632
ENSSSCT00000002957	ENSSSCG00000002666	KIAA0513	6:3726751-3746892	4275	0.350386	0.0970712	0.440613	9.91728e-06	0.0663352	2.39086e-08	0.000271446	2.22923e-05	0.554499	0.0661386	0.0842245	0.0596991
ENSSSCT00000002958	ENSSSCG00000002667	ZDHHC7	6:3786337-3817952	2824	1.06631	0.624315	2.35979	2.05042	2.34828	2.51276	1.4657	1.26217	1.72403	0.594734	0.792214	0.718285
ENSSSCT00000002959	ENSSSCG00000002668	FAM92B	6:3710165-3720252	1366	0	0	5.15564e-126	0	0.0144394	0.0293058	0.0941061	0.104522	0	0.0235557	0.0147648	0.029454
ENSSSCT00000002960	ENSSSCG00000002669	CRISPLD2	6:3894079-3929464	1439	1.59387	1.25626	2.74141	1.85197	2.80934	0.505815	2.11034	0.652888	1.04855	0.0846717	0.321308	0.60402
ENSSSCT00000002961	ENSSSCG00000002670	USP10	6:3977230-4043533	3360	2.21128	1.31257	4.28205	3.44139	2.46308	3.37874	3.20474	2.77663	3.75812	1.01856	1.94764	1.58633
ENSSSCT00000002962	ENSSSCG00000002671	ATP2C2	6:4240667-4313279	3264	0.0287836	0	0	0.0110717	0	0.00561951	0	0	0	0	0	0
ENSSSCT00000002963	ENSSSCG00000002672	TLDC1	6:4214817-4225389	1224	6.13493e-06	1.0629e-07	0.218502	1.18026e-05	3.23236e-06	2.82604e-06	0.139438	0.00177768	0.000590094	4.27487e-07	0.0959407	0.00716158
ENSSSCT00000002964	ENSSSCG00000034385	ADAD2	6:4437940-4443805	1674	0	0	0	0	4.16392e-06	0	4.20898e-06	0	0	0	0	0
ENSSSCT00000002967	ENSSSCG00000002675	DNAAF1	6:4457290-4479828	2331	0.0740729	0.0249067	0.0893218	0.0634843	0.047722	0.032252	0.00829398	0.0330075	0.11114	0.0248762	0.0327419	0.0409878
ENSSSCT00000002970	ENSSSCG00000034385	ADAD2	6:4437940-4445546	1449	0	0	0	0	0.0134881	0	0.0421333	0	0	0	0	0
ENSSSCT00000002973	ENSSSCG00000002680	TAF1C	6:4451209-4457089	3231	0.669135	0.463723	1.86188	1.5612	1.20518	0.988389	1.02953	0.593898	1.00165	0.199364	0.404762	0.382763
ENSSSCT00000002974	ENSSSCG00000002681	HSDL1	6:4479916-4502007	4012	0.242494	0.250167	0.70006	0.956462	0.634954	0.888949	0.883096	0.632674	0.761414	0.0760739	0.336093	0.17122
ENSSSCT00000002975	ENSSSCG00000002682	MBTPS1	6:4503478-4558028	3535	1.45417	0.870109	4.09766	7.10925	6.16526	5.76257	4.38365	3.37573	3.64125	0.524684	1.22855	1.29682
ENSSSCT00000002977	ENSSSCG00000002684	CDH13	6:4809106-5518799	2678	3.79762	3.55499	14.1951	10.6795	15.7339	17.4493	19.5298	10.3085	9.17924	2.30026	5.08724	4.38138
ENSSSCT00000002981	ENSSSCG00000002688	PLCG2	6:6433142-6603090	8219	0.11752	0.0939632	0.33299	0.246182	0.472037	0.409162	0.378372	0.33186	0.278866	0.109527	0.173872	0.240934
ENSSSCT00000002982	ENSSSCG00000002689	CMIP	6:6654408-6701734	2892	3.04409e-05	1.72113e-05	0.18556	0.105127	0.0702199	0.0484433	0.0872902	0.0332498	1.97388e-05	0.054002	0.0527174	0.0592506
ENSSSCT00000002983	ENSSSCG00000002690	GAN	6:6931563-6989675	4782	0.595391	0.670898	1.49349	1.71046	1.28918	1.38129	0.682756	0.903888	1.20555	0.257196	0.44156	0.481955
ENSSSCT00000002989	ENSSSCG00000002696	VAT1L	6:9957502-10120510	4066	0.0702351	0.0410807	0.168287	0.183503	0.204755	0.209521	0.191978	0.181124	0.207904	0.0803275	0.0437858	0.0627695
ENSSSCT00000002991	ENSSSCG00000002697	NUDT7	6:10161959-10173980	1086	1.11893	1.031	3.97764	7.22858	8.56831	9.50806	4.75694	1.99061	2.15032	0.601861	1.07835	0.689546
ENSSSCT00000002995	ENSSSCG00000002701	MON1B	6:10713723-10725182	5608	0.0390613	0.150175	0.122843	2.60078e-06	0.0213996	0.0871248	0.0933471	0.124704	0.14676	5.78896e-06	8.74139e-06	0.0538332
ENSSSCT00000002997	ENSSSCG00000002703	-	6:12047011-12057342	2567	1.52923	1.19817	4.59637	6.93685	6.56479	6.68293	5.35203	4.1207	5.15701	1.02473	1.45029	1.3608
ENSSSCT00000002998	ENSSSCG00000002704	KARS	6:12057523-12073748	2199	13.2886	11.187	33.3417	60.0718	55.598	63.927	50.6456	26.8417	36.9416	7.66035	11.6498	11.5008
ENSSSCT00000003000	ENSSSCG00000002706	ADAT1	6:12076389-12103231	1839	0.216984	1.29811e-26	0.758426	0.295465	0.296845	0.485178	0.305608	0.137978	0.319848	0.150063	0.0180043	0.133446
ENSSSCT00000003001	ENSSSCG00000002707	GABARAPL2	6:12122056-12132991	1168	4.64345	4.73604	9.5197	35.4606	37.9587	33.0981	22.2669	11.9432	13.0058	3.1218	4.20814	3.46806
ENSSSCT00000003002	ENSSSCG00000002708	-	6:12140686-12164140	2754	0.110214	0.0625401	0.257959	0.291813	0.365491	0.390643	0.31196	0.117283	0.0796	0.041646	0.123261	0.0411818
ENSSSCT00000003003	ENSSSCG00000002709	-	6:12166240-12188813	3403	0.08265	0.0722629	0.113896	0.0423775	0.0371426	0.0483908	0.0941406	0.0661487	0.0476738	0.00555286	0.0602263	0.0274619
ENSSSCT00000003006	ENSSSCG00000002712	LDHD	6:12548130-12552242	2005	1.08297	0.498608	8.3542	3.59168	6.72814	5.2111	10.7164	8.62252	13.7331	1.00053	1.94593	2.82292
ENSSSCT00000003008	ENSSSCG00000002714	WDR59	6:12682198-12769299	3523	0.106689	0.0900921	0.600536	0.591513	0.897323	0.133632	0.510062	0.114234	0.214036	0.0286243	0.144313	0.192552
ENSSSCT00000003009	ENSSSCG00000002715	RFWD3	6:12952240-12994052	4810	0.126816	0.124067	0.362619	0.822401	0.845636	0.830491	0.586089	0.249564	0.328138	0.120077	0.221357	0.191623
ENSSSCT00000003010	ENSSSCG00000002716	MLKL	6:12930411-12948362	1338	0.0845554	0.0901778	0.295609	0.46767	0.304772	0.275433	0.407127	0.270087	0.262957	0.0845509	0.231969	0.251121
ENSSSCT00000003012	ENSSSCG00000002718	FA2H	6:12855420-12909499	1092	0.0191678	0	0.0763597	0.0374015	0.0563694	0.0572433	0.0195278	0	0	0	0.0191316	0
ENSSSCT00000003013	ENSSSCG00000002719	EXOSC6	6:13296054-13296873	819	0.135522	0.109291	0.706694	1.36036	1.28879	0.928245	1.02989	0.57946	0.535186	0.190788	0.162741	0.671257
ENSSSCT00000003016	ENSSSCG00000002722	DDX19B	6:13328252-13354829	1810	1.26134	0.699773	2.54367	3.14451	3.56103	2.49408	3.40023	2.18156	2.57466	0.491528	0.76315	1.17481
ENSSSCT00000003017	ENSSSCG00000002723	-	6:13298697-13317903	2880	9.21677	5.20892	36.2055	8.90878	9.86974	9.56625	16.9131	13.0174	34.2994	3.54155	7.48991	4.74608
ENSSSCT00000003018	ENSSSCG00000002724	PDPR	6:13187421-13230598	5765	1.02543	0.373557	2.43638	1.9976	2.33494	1.74507	0.827478	0.81026	1.50599	0.000285944	0.000235534	0.1425
ENSSSCT00000003024	ENSSSCG00000002729	-	6:13683800-13791246	3106	0.977544	0.532344	2.6272	1.87097	1.62106	1.6961	2.08594	1.37705	2.3729	0.441102	0.793703	1.18584
ENSSSCT00000003025	ENSSSCG00000002730	CALB2	6:14392237-14420663	1301	0	0	0	0	0.0152783	0	0	0	0	0	0	0
ENSSSCT00000003029	ENSSSCG00000002734	MARVELD3	6:14616480-14630798	2153	0	0	0	0.0346039	0	0.0175848	0	0	0	0	0	0.00892769
ENSSSCT00000003030	ENSSSCG00000002734	MARVELD3	6:14616477-14625985	2080	0	0.018774	0	0.00898313	0	0.00913115	0	0	0	0	0	0
ENSSSCT00000003032	ENSSSCG00000002736	TAT	6:14570588-14583189	3107	0	0	0	0	0	0	0	0	0	0	0.00602607	0
ENSSSCT00000003033	ENSSSCG00000002737	CHST4	6:14535890-14544437	1854	0.0103662	0	0	0	0	0	0	0.0104076	0	0	0	0
ENSSSCT00000003034	ENSSSCG00000002738	ZNF23	6:14463300-14473545	1905	0.0921526	0.206558	0.495857	0.811289	0.96232	0.814889	0.516948	0.750627	0.554424	0.0928249	0.112091	0.132503
ENSSSCT00000003035	ENSSSCG00000002739	PHLPP2	6:14637937-14670909	3252	1.41425e-07	4.52308e-06	7.31314e-23	5.92341e-27	3.15554e-15	5.17229e-06	7.88741e-13	0.0928073	1.21986e-16	8.94339e-24	0.0247798	0.0100311
ENSSSCT00000003036	ENSSSCG00000002740	AP1G1	6:14719952-14809756	6864	1.65264	1.10533	3.32935	4.70343	3.69817	4.2017	3.00803	2.60477	3.50372	0.736256	1.23314	1.13017
ENSSSCT00000003037	ENSSSCG00000002741	ZNF821	6:14850565-14870622	1749	0.107845	3.29476e-50	1.35419e-08	0.0313049	6.08398e-07	1.26081e-06	3.16752e-09	3.73818e-06	0.0840629	0.0299591	1.55444e-08	2.15734e-09
ENSSSCT00000003039	ENSSSCG00000002743	-	6:14868902-14910662	2334	1.49615	1.24582	5.91462	6.23567	6.49501	5.40461	4.89181	2.93596	2.93733	0.724774	1.4206	1.70104
ENSSSCT00000003042	ENSSSCG00000002745	-	6:14913696-14913897	201	0.748293	0.372763	1.35201	0.922091	0	0	0.476769	0	0	0	0	0.690092
ENSSSCT00000003043	ENSSSCG00000002746	-	6:14942932-14955990	1510	0.555843	0.453818	1.91455	1.48819	0.952599	1.1493	1.03205	0.772705	1.19445	0.146595	0.290042	0.302741
ENSSSCT00000003044	ENSSSCG00000002747	PMFBP1	6:15020159-15062015	3051	0	0	7.33486e-06	0	0	0.000122024	0	0	0	1.41226e-06	0	0
ENSSSCT00000003045	ENSSSCG00000002748	DHX38	6:14998070-15017174	5337	0.476272	0.284002	0.768985	1.41245	1.05835	1.18585	0.668631	0.69829	0.582822	0.180722	0.354738	0.336121
ENSSSCT00000003046	ENSSSCG00000002749	-	6:14981425-14985098	1044	0.303967	0.127926	0.582279	0.38942	0.569608	0.263025	0.377125	0.1853	0.11088	0.0686567	0.100507	0.0691583
ENSSSCT00000003049	ENSSSCG00000002752	ZFHX3	6:15698297-16023169	12142	1.32886	0.884834	1.38402	0.825201	0.627251	0.646788	0.674829	0.642507	1.24847	0.302232	0.661581	0.744191
ENSSSCT00000003050	ENSSSCG00000002753	NOB1	6:17233845-17247471	3671	0.661628	0.277263	1.28702	1.92693	1.48913	1.27062	1.0686	0.870381	1.72138	0.266722	0.480372	0.360239
ENSSSCT00000003051	ENSSSCG00000002754	NQO1	6:17292769-17302627	1925	0.789607	0.459492	2.44095	1.93653	3.32456	3.68948	29.4048	12.7166	6.39083	1.57036	3.38494	1.88447
ENSSSCT00000003052	ENSSSCG00000002755	NFAT5	6:17315378-17362974	4541	0.406715	0.219122	0.824048	1.01724	0.508827	0.391348	0.429012	0.551326	0.302421	0.00107281	4.82578e-09	0.0609249
ENSSSCT00000003053	ENSSSCG00000033944	CYB5B	6:17532072-17558011	636	0.159124	0.22058	1.27105	1.07859	1.29759	0.86989	1.21449	0.370544	0.420731	0.126417	1.34536e-05	0.258245
ENSSSCT00000003056	ENSSSCG00000002759	-	6:17645551-17654740	4390	0.990308	0.620258	1.99863	2.29683	3.04801	2.64941	2.32145	1.49251	1.97816	0.369538	0.801443	0.671838
ENSSSCT00000003058	ENSSSCG00000002761	-	6:17634365-17641903	931	0.0477433	0	0.11802	0.0454056	0.0228318	0.0970163	0.0473979	0.164579	0.364191	0.0248933	0	0.0243058
ENSSSCT00000003059	ENSSSCG00000002762	TERF2	6:17605870-17634604	5432	0.725154	0.499283	1.01544	1.24523	1.01887	0.985342	0.642493	0.65674	1.02381	0.327765	0.437548	0.388593
ENSSSCT00000003061	ENSSSCG00000002763	PRMT7	6:28883668-28937301	2089	2.02997e-40	0.115408	0.815464	0.758592	0.820248	0.237548	0.268945	0.117755	1.01256	0.207064	2.74036e-99	0.0868147
ENSSSCT00000003062	ENSSSCG00000002764	SMPD3	6:28938288-29025391	5273	0	3.28278e-258	0	1.95576e-276	6.3495e-255	1.00185e-136	0	0	1.90228e-160	1.40821e-214	0	3.85293e-07
ENSSSCT00000003065	ENSSSCG00000002767	TSNAXIP1	6:28428916-28450433	2493	0	0	0.0075527	0	0.022188	0.0299879	0	0	0	0	0	0
ENSSSCT00000003066	ENSSSCG00000002768	CENPT	6:28446686-28456130	1590	2.5461e-06	0	0.0441633	0.240389	0.263688	0.618116	0.0927472	0.190921	0.0551442	0.0285467	0.0802127	0.044342
ENSSSCT00000003067	ENSSSCG00000002769	THAP11	6:28465203-28467074	1871	4.32324	3.01244	10.4669	10.3045	15.1505	13.2294	11.7383	7.43639	9.29167	1.95645	3.76234	3.29503
ENSSSCT00000003069	ENSSSCG00000002771	EDC4	6:28489421-28501527	4851	2.57542	1.57151	5.25671	4.15984	3.94883	4.11099	3.41684	2.33948	3.20489	0.852374	1.78176	1.59601
ENSSSCT00000003072	ENSSSCG00000002774	RIPOR1	6:28164510-28180894	4012	0.223852	0.134818	0.156171	0.411122	0.320085	0.282156	0.303727	0.113066	0.21363	0.152391	0.048969	0.190599
ENSSSCT00000003074	ENSSSCG00000002776	ATP6V0D1	6:28089646-28132085	2232	1.89717	1.3396	4.41718	7.35324	7.00382	6.10308	5.19007	3.08762	4.25243	0.886159	1.78414	1.77776
ENSSSCT00000003075	ENSSSCG00000002777	HSD11B2	6:28083954-28089672	1934	0.0705028	0.0203183	0.099527	0.0389212	0.0390262	0.0791482	0.172861	0.101131	0.077893	0.0507274	0.160367	0.120317
ENSSSCT00000003076	ENSSSCG00000002778	ZDHHC1	6:28050128-28072096	2343	0.128532	0.109553	0.180936	0.390539	0.246778	0.194301	0.150923	0.0347727	0.118016	1.31206e-24	0.0263946	0.0373199
ENSSSCT00000003077	ENSSSCG00000002779	LRRC36	6:27966397-28038055	2271	0.0931063	0.0512285	0.325751	0.277545	0.343652	0.779726	0.716659	0.322543	0.114331	0.110857	0.214678	0.0758696
ENSSSCT00000003078	ENSSSCG00000035983	TPPP3	6:28045436-28071540	3732	0.135538	0.180653	0.672046	1.80071	2.29554	3.18964	2.12178	0.742942	0.398899	0.308403	0.514008	0.411082
ENSSSCT00000003079	ENSSSCG00000002781	KCTD19	6:27932930-27960962	2787	0.0136037	0.00686164	0.0201079	0.00654821	0.00656109	0.033249	0.0136896	0.0613068	0.00654932	0	0	0.00677759
ENSSSCT00000003080	ENSSSCG00000002782	PLEKHG4	6:27923815-27932035	3636	0.00514069	0	0.0202341	0.00988038	0.0247405	0.0300822	0.0309878	0.0102828	0	0	0.00510754	0.0102496
ENSSSCT00000003081	ENSSSCG00000002783	SLC9A5	6:27884658-27903090	2706	0.189492	0.0920382	0.352774	0.236533	0.209923	0.130406	0.113024	0.133566	0.229821	0.028287	0.146522	0.0489492
ENSSSCT00000003084	ENSSSCG00000002786	ELMO3	6:27841830-27846231	2142	0.027045	0.0545612	0.115704	0.16529	0.061046	0.0795764	0.30003	0.135665	0.217594	0.00908191	0.0717455	0.0448855
ENSSSCT00000003085	ENSSSCG00000002787	E2F4	6:27832629-27840621	1289	0.0677262	1.36374e-05	0.508019	0.902887	0.523865	0.682584	0.8878	0.309234	0.618841	0.0110395	0.000688437	0.159602
ENSSSCT00000003086	ENSSSCG00000002788	EXOC3L1	6:27827346-27832454	2692	0.202371	0.0921764	0.6086	0.856751	1.08187	0.982393	0.872151	0.659895	0.521629	0.0656831	0.256406	0.172527
ENSSSCT00000003090	ENSSSCG00000002790	-	6:27864350-27867227	787	1.93559	1.29565	7.94177	9.50244	8.31593	8.52952	8.62032	3.28182	3.68804	1.05345	1.23859	1.4783
ENSSSCT00000003092	ENSSSCG00000002792	HSF4	6:27809464-27813401	1437	0.0279814	0.05644	0.15259	0.515793	0.504017	0.22115	0.864974	0.760994	2.0793	0.0845244	0.20911	0.403445
ENSSSCT00000003093	ENSSSCG00000002793	-	6:27805811-27807788	1083	0.116128	0.0780638	0.308466	0.226643	0.379552	0.154179	0.256384	0.0783206	0.113551	0.0194778	0.154554	0.0192159
ENSSSCT00000003095	ENSSSCG00000002795	CDH11	6:25782755-25872995	5928	0.791749	0.771469	1.67168	1.79603	1.55195	1.35547	0.768791	1.06085	1.20141	0.316371	0.523079	0.627872
ENSSSCT00000003099	ENSSSCG00000002799	CNOT1	6:20272316-20372299	7308	2.16565	1.63375	3.99911	3.31004	3.31674	3.44287	2.43284	2.64112	3.54945	1.23102	1.86438	2.0147
ENSSSCT00000003101	ENSSSCG00000021911	NDRG4	6:20251957-20297225	3225	0.0906185	0.00218897	0.206202	0.391213	0.252302	0.37217	0.227249	0.213466	0.241126	0.0704979	0.0735454	0.0641806
ENSSSCT00000003102	ENSSSCG00000002802	GINS3	6:20162536-20171485	3373	0.0495897	0.0336634	0.0766431	0.575653	0.428478	0.461325	0.285072	0.139581	0.0467169	0.0112094	0.060343	0.067092
ENSSSCT00000003103	ENSSSCG00000002803	CCDC113	6:20052734-20088815	4753	0.00389058	0.00392519	0.0229459	0.0149354	0.0149552	0	0.0156155	0	0	0	0.00386392	0.00387996
ENSSSCT00000003104	ENSSSCG00000002804	CSNK2A2	6:19974665-20016754	1859	0.000272231	0.703703	0.285036	0.502112	1.14746	1.94542	0.551378	0.185145	1.99848e-05	0.271095	0.0340373	0.29682
ENSSSCT00000003105	ENSSSCG00000002805	CFAP20	6:19948917-19969347	2768	0.356273	0.241907	0.708933	1.73481	1.74486	1.88904	1.27557	0.555802	0.857666	0.186402	0.388228	0.150191
ENSSSCT00000003106	ENSSSCG00000002806	MMP15	6:19890883-19912935	4358	1.94398	0.550598	3.55528	2.14909	2.23605	3.42413	5.8195	3.64204	3.06476	0.982002	1.72149	1.98218
ENSSSCT00000003107	ENSSSCG00000002807	USB1	6:19852093-19873076	806	0.331795	0.250845	0.915433	1.44301	0.767474	1.08705	0.71026	0.168965	0.382426	0.111208	0.193718	0.301247
ENSSSCT00000003108	ENSSSCG00000002808	ZNF319	6:19845192-19851325	4079	0.474203	0.248405	0.923814	0.928365	0.92096	0.884212	0.636377	0.423908	0.678652	0.12408	0.253645	0.236408
ENSSSCT00000003111	ENSSSCG00000002811	CNGB1	6:19753035-19825631	3492	0.032177	0.021641	0.0316687	0.0103098	0.0361437	0.0366243	0.026945	0.0214581	0.0103094	0.00540464	0.0159859	0.0213837
ENSSSCT00000003112	ENSSSCG00000002812	KIFC3	6:19660616-19692062	2883	8.8387e-05	0.142277	0.684406	0.434236	0.195324	0.553608	0.113718	0.179559	0.245836	5.47907e-06	0.109386	0.0505656
ENSSSCT00000003113	ENSSSCG00000002813	KATNB1	6:19630458-19659033	2468	0.689942	0.609067	2.08086	1.25831	1.00841	1.22647	1.20433	0.778954	0.903966	0.208618	0.342906	0.273585
ENSSSCT00000003114	ENSSSCG00000002814	ADGRG3	6:19574584-19601100	4613	0.00802579	0.02834	0.00394495	0.0231104	0.057854	0.0703332	0.0241626	0	0.103972	0.00404473	0.0438411	0.0560251
ENSSSCT00000003115	ENSSSCG00000002815	ADGRG1	6:19536340-19570889	3851	1.05642	0.341906	2.41715	2.62811	2.35889	2.23918	2.60331	1.14047	1.25999	0.329226	0.904789	0.947381
ENSSSCT00000003117	ENSSSCG00000002817	DRC7	6:19603447-19629173	2906	0.00650713	0	0	0.00626249	0	0.0127179	0.00654628	0	0	0	0	0.00648446
ENSSSCT00000003118	ENSSSCG00000002818	PLLP	6:19216839-19241227	1355	0.327322	0.112377	0.736464	0.34803	0.498829	0.447881	1.3023	0.181627	0.603188	0.055097	1.12585e-05	0.250171
ENSSSCT00000003119	ENSSSCG00000002819	ARL2BP	6:19207007-19215025	2189	0.246574	0.124362	0.42594	1.10449	0.792042	0.811636	1.87356	0.768503	1.139	0.159692	0.402955	0.32448
ENSSSCT00000003120	ENSSSCG00000002820	RSPRY1	6:19154418-19204824	3853	0.493542	0.429574	0.913935	1.60836	1.21975	1.54248	1.71549	1.4708	1.56169	0.424267	0.639328	0.771859
ENSSSCT00000003121	ENSSSCG00000002821	CCL22	6:19296636-19302737	2003	0	0	0	0	0	0	0.00978401	0.0291949	0.0655749	0.00976608	0.00964659	0.0193043
ENSSSCT00000003122	ENSSSCG00000002822	AMFR	6:29366818-29413697	3613	3.49984	3.02763	8.85748	11.9057	11.5508	9.13282	10.4754	8.95029	9.84564	1.92444	2.79257	3.03507
ENSSSCT00000003123	ENSSSCG00000034192	GNAO1	6:29418806-29572622	934	1.60187e-07	7.42233e-08	3.32269e-07	8.1873e-08	4.16593e-07	8.63905e-08	3.97859e-06	2.87105e-07	1.68678e-07	0.0105704	5.09802e-07	1.91291e-08
ENSSSCT00000003125	ENSSSCG00000002825	-	6:29884249-29912913	1843	3.46781e-19	1.44514e-05	0.0420888	1.27751e-05	1.99201e-06	0	8.00331e-06	1.31781e-06	6.38981e-14	0	1.52813e-05	4.07269e-07
ENSSSCT00000003126	ENSSSCG00000002825	-	6:29884263-29912890	1706	0.0420977	0.00386975	4.89581e-11	0.0175059	0.119221	0	0.50813	0.113746	9.28911e-06	0	0.0114897	0.0817672
ENSSSCT00000003127	ENSSSCG00000039985	-	AEMK02000576.1:35883-109045	1275	8.11959e-245	0	1.77948e-230	0	0.00864035	0	0.024312	1.85657e-218	0	1.54054e-248	9.26935e-274	0.0088092
ENSSSCT00000003128	ENSSSCG00000002827	SLC6A2	6:29935325-29980650	1854	0	0.0319159	0.0208538	0	0.0306706	0	0.0319603	0	0.0612137	0	0	0
ENSSSCT00000003129	ENSSSCG00000002828	LPCAT2	6:29997764-30056713	4668	0.0713509	0.119976	0.190936	0.429914	0.834311	0.760313	0.926821	0.336664	0.296683	0.103881	0.145664	0.284618
ENSSSCT00000003130	ENSSSCG00000002829	MMP2	6:30058594-30087031	3733	7.52672	6.98287	17.6306	26.7899	24.9405	12.2501	19.1103	6.74172	8.78341	2.77217	5.59472	6.06284
ENSSSCT00000003131	ENSSSCG00000002830	IRX6	6:30198945-30205535	2975	0	0	0.00521052	0	0.00611936	0	0.00319242	0.00211822	0	0.00213216	0.0031546	0
ENSSSCT00000003132	ENSSSCG00000002831	IRX3	6:31046344-31051867	4667	0.265643	0.248004	0.600869	0.551782	0.518227	0.289524	0.1492	0.0937587	0.39947	0.0666048	0.0767859	0.0672164
ENSSSCT00000003136	ENSSSCG00000002835	TOX3	6:32494186-32608693	1964	0.0297006	0	0.0097744	0	0.00958	0.00971388	0	0	0	0	0.00984314	0
ENSSSCT00000003137	ENSSSCG00000002836	SALL1	6:33732002-33750098	6641	0	0.0027809	0	0.002642	0	0	0	0	0	0.00555798	0	0
ENSSSCT00000003138	ENSSSCG00000040286	CYLD	6:34062708-34121238	3572	0.823939	0.546326	1.69498	2.97073	3.22357	3.00709	2.30902	1.60511	1.50358	0.397395	0.598011	0.607646
ENSSSCT00000003139	ENSSSCG00000002838	ZNF423	6:35119855-35299693	4453	1.63284	1.17896	2.97063	2.20357	2.2743	2.31243	1.59565	0.723239	1.09865	0.269469	0.820658	0.832025
ENSSSCT00000003142	ENSSSCG00000002841	N4BP1	6:36122034-36174504	3865	1.30594	1.20961	2.54456	3.5963	3.69317	3.12682	2.07495	1.66244	2.39022	0.45201	0.571531	0.744964
ENSSSCT00000003144	ENSSSCG00000023391	LONP2	6:36372597-36466175	2896	4.05831	2.99771	11.872	15.8919	14.9452	13.0172	7.97866	3.8519	6.52671	1.4389	2.28692	1.95764
ENSSSCT00000003145	ENSSSCG00000002844	-	6:36994430-37193598	4092	6.27762	6.88581	18.8426	32.1296	45.6212	31.1548	28.3842	22.0088	27.5958	5.70125	7.43515	6.92723
ENSSSCT00000003147	ENSSSCG00000002846	DNAJA2	6:37591568-37606403	3630	1.45867	1.58669	4.68793	7.6297	7.61547	6.78995	6.05065	3.25458	4.466	1.22754	2.13886	1.93839
ENSSSCT00000003148	ENSSSCG00000002847	GPT2	6:37625194-37669628	4267	0.0957165	0.0307127	0.510066	0.523434	0.125496	0.152577	0.410563	0.0434745	0.960682	0.0526097	0.250649	0.0650636
ENSSSCT00000003150	ENSSSCG00000002849	-	6:38029571-38062887	2271	0	1.28807e-07	0.00958904	6.61551e-07	1.77586e-06	0.408438	0.150144	0.096695	0.0419525	0.0170545	0.00360833	0.0187446
ENSSSCT00000003153	ENSSSCG00000002852	PLEKHF1	6:39786955-39797573	1895	5.41684	3.11621	11.6033	11.4143	13.5013	5.43401	5.58435	3.40262	4.76002	0.466796	1.05564	1.34289
ENSSSCT00000003155	ENSSSCG00000002854	POP4	6:39734548-39745984	2645	0.67926	0.302302	2.39731	0.589892	0.523267	0.397708	0.89042	0.409566	0.624211	0.157664	0.252826	0.102972
ENSSSCT00000003156	ENSSSCG00000002855	-	6:39919623-39933363	2776	0.133194	0.151591	0.387031	0.532651	0.767609	0.751279	0.343688	0.160755	0.154562	0.0722681	0.159568	0.142927
ENSSSCT00000003158	ENSSSCG00000002857	-	6:42608306-42664722	3051	0.0865312	0.0872937	0.237409	0.642206	0.577851	1.03236	0.186479	0.482571	0.107043	0.105884	0.110574	0.0923977
ENSSSCT00000003160	ENSSSCG00000002859	ANKRD27	6:42501169-42559492	4335	0.390256	0.275442	1.12622	1.76379	1.76464	1.66314	1.40514	1.0879	0.729289	0.229335	0.254677	0.213412
ENSSSCT00000003161	ENSSSCG00000002860	PDCD5	6:42483647-42491591	698	4.97949	5.35306	18.7416	32.8887	27.1524	24.1274	28.2652	20.0388	23.712	3.5029	4.16083	4.85855
ENSSSCT00000003163	ENSSSCG00000002862	WDR88	6:42939343-42967828	1386	0	0	0	0	0.0283988	0	0	0	0	0	0	0
ENSSSCT00000003164	ENSSSCG00000002863	LRP3	6:42988467-43003256	2171	1.48712	0.666367	4.90903	3.03777	3.56006	2.61675	1.63724	0.676927	0.839008	0.107967	0.459433	0.511108
ENSSSCT00000003165	ENSSSCG00000002864	SLC7A10	6:43000013-43017636	4368	0.386433	0.188506	1.00211	0.872476	0.943105	0.864481	0.494453	0.284352	0.317941	0.0984423	0.215113	0.232897
ENSSSCT00000003166	ENSSSCG00000002865	GPATCH1	6:42895542-42934548	2709	0.413588	0.304076	0.552715	1.18126	0.987494	1.1517	0.444507	0.519587	0.749407	0.183649	0.236946	0.209536
ENSSSCT00000003167	ENSSSCG00000002866	CEBPA	6:43084645-43085710	1065	0.177655	0.119422	0.550731	1.94631	0.948871	0.472002	1.24755	0.45944	0.675874	0.0993215	0.137941	0.137171
ENSSSCT00000003168	ENSSSCG00000002867	CEBPG	6:43164938-43175006	3820	1.0257	0.860919	4.65471	4.27852	4.06657	2.91901	6.536	5.48316	13.7898	0.171716	1.56051	0.818649
ENSSSCT00000003169	ENSSSCG00000002868	PEPD	6:43177064-43290369	1815	3.24895	2.17753	9.64345	7.48926	8.80462	8.07794	4.92947	2.72246	3.23159	0.576317	1.57965	1.53651
ENSSSCT00000003170	ENSSSCG00000002869	LSM14A	6:43847881-43903614	3186	2.15088	2.5928	5.29847	14.6357	14.2943	13.1746	12.1056	9.72459	10.199	1.6334	2.30521	1.77992
ENSSSCT00000003173	ENSSSCG00000002872	KIAA0355	6:43940694-44030705	6458	1.3938e-05	0.00178529	0.195056	0.110489	0.132726	0.963763	0.83939	0.735208	3.53107e-05	0.000147118	0.00136114	0.258145
ENSSSCT00000003175	ENSSSCG00000002873	GPI	6:44032622-44069331	2104	21.342	17.0312	68.3397	68.2901	96.5905	103.532	285.773	253.604	265.758	88.3147	134.792	131.689
ENSSSCT00000003177	ENSSSCG00000002875	-	6:44074126-44097065	1175	0.598431	0.479215	2.22322	2.93143	3.54698	3.67972	2.86454	1.76029	3.65788	0.442902	1.05352	0.87418
ENSSSCT00000003178	ENSSSCG00000002876	-	6:44103214-44119940	678	0.103594	2.52179e-65	6.79612e-20	0.461046	3.81591e-18	0.167572	6.85798e-32	1.00585e-22	1.0785e-22	0.301312	0.0810934	1.72604e-26
ENSSSCT00000003179	ENSSSCG00000002877	-	6:44243313-44354235	1902	0.0560405	4.90507e-06	0.000103419	1.53012	1.62502	1.11121	0.439288	0.306956	0.241396	0.144987	0.139744	0.14289
ENSSSCT00000003181	ENSSSCG00000002879	GRAMD1A	6:44576947-44593804	2082	1.0319	0.881462	2.68984	2.41392	3.48158	2.627	2.25077	1.0075	1.72387	0.496351	0.79541	0.860859
ENSSSCT00000003182	ENSSSCG00000002880	-	6:44520831-44523776	2945	0.346465	0.38835	1.04286	0.635943	0.890758	0.708406	0.697036	0.404678	0.64219	0.109911	0.172187	0.134271
ENSSSCT00000003184	ENSSSCG00000002882	KRTDAP	6:44932093-44935369	545	3.53509e-05	0	2.97435e-05	0	0	0	0	0	0	0	0	0
ENSSSCT00000003185	ENSSSCG00000002883	-	6:44942069-44950207	829	0	0	0	0	0	0	0	0.0271721	0	0	0	0
ENSSSCT00000003186	ENSSSCG00000002884	LSR	6:44759413-44773283	1794	0.470188	0.143378	0.692049	0.560403	0.699877	0.613008	0.220976	0.208754	0.412692	0.0550679	0.0870769	0.185004
ENSSSCT00000003187	ENSSSCG00000002885	USF2	6:44774561-44783590	1407	2.08321	1.76885	2.00675	2.98137	3.2687	3.4597	5.61128	4.25197	5.85001	1.00264	1.35829	2.44627
ENSSSCT00000003190	ENSSSCG00000002887	MAG	6:44794253-44809924	2392	0.0720488	0.0403771	0.150038	0.223788	0.224288	0.297925	0.21777	0.0160499	0.131232	0.00806565	0.0159224	0.0159482
ENSSSCT00000003191	ENSSSCG00000002888	GAPDHS	6:44972130-44978847	978	0	0	0.0435992	0.0641036	0.0429655	0	0.0223079	0.022137	0	0	0	0
ENSSSCT00000003197	ENSSSCG00000002893	CD22	6:44822979-44835956	4118	1.29925e-22	3.20697e-21	7.56808e-25	1.47928e-23	3.80603e-14	6.47048e-10	0.00210165	9.68544e-24	3.81589e-11	3.28496e-21	8.06813e-20	1.16013e-22
ENSSSCT00000003198	ENSSSCG00000002893	CD22	6:44822979-44879703	2654	0.0429772	0.0216719	0.11999	0.13413	0.0187878	0.115422	0.144898	0.0717621	0.0689972	0.0216468	0.0255899	6.64434e-06
ENSSSCT00000003199	ENSSSCG00000002895	-	6:45146845-45160283	5711	0.852711	0.61892	1.2036	1.24633	0.914175	0.919329	0.719198	0.596741	0.976354	0.222514	0.450479	0.682541
ENSSSCT00000003200	ENSSSCG00000035162	-	6:45170297-45172215	645	0.0933399	4.46959e-78	1.0142	0.919584	0.180223	0.794658	0.77692	0.0395551	0.00440128	1.48269e-09	0.0671361	0.120609
ENSSSCT00000003202	ENSSSCG00000002898	-	6:45175646-45183952	3353	0.514857	0.400845	0.787781	0.715623	0.58479	0.551624	0.337492	0.201567	0.322836	0.0902361	0.205757	0.15898
ENSSSCT00000003204	ENSSSCG00000002900	-	6:45184683-45195050	2206	0.0931167	9.99031e-07	0.191038	0.147817	0.069049	0.0922841	0.0831101	0.103184	0.10957	0.149565	0.112927	5.27673e-05
ENSSSCT00000003206	ENSSSCG00000002901	UPK1A	6:45105117-45113631	774	0	0	0.14611	0.0573801	0.0288928	0.0293882	0	0	0	0	0	0
ENSSSCT00000003207	ENSSSCG00000002902	ATP4A	6:44984232-44997552	3208	0.0175874	0.0118284	0.0750401	0.0394672	0.0169443	0.0114472	0	0	0.0112767	0	0.0116521	0
ENSSSCT00000003208	ENSSSCG00000002903	-	6:45005357-45006075	351	0	0	0	0.295738	0	0	0	0	0	0	0	0
ENSSSCT00000003209	ENSSSCG00000002904	HAUS5	6:45057546-45071611	4874	2.85253e-06	3.0847e-06	7.84149e-07	1.6086e-06	2.02684e-05	2.93397e-06	7.84525e-07	4.13329e-06	3.27918e-06	5.69482e-07	2.23732e-06	2.33571e-07
ENSSSCT00000003210	ENSSSCG00000002905	RBM42	6:45074526-45083228	1711	2.75749	2.0906	8.58472	6.47546	7.92305	6.07136	7.86439	5.82812	7.31337	0.726971	2.01105	1.80499
ENSSSCT00000003211	ENSSSCG00000002906	ETV2	6:45087298-45089576	981	0.239341	0.175502	0.325777	0.447048	1.32693	0.717516	0.977885	0.617532	0.213389	0.0437828	0.326034	0.237462
ENSSSCT00000003212	ENSSSCG00000002907	-	6:45091932-45102669	632	16.1906	13.4817	68.0843	66.1482	81.2818	87.9216	47.4643	23.1318	28.0143	5.27666	10.0227	7.41294
ENSSSCT00000003213	ENSSSCG00000002908	ZBTB32	6:45141888-45145889	2176	5.06507e-07	0	0.0150956	0	0	0	0	0.020121	0.000225178	0.00892806	0	0
ENSSSCT00000003215	ENSSSCG00000002910	ALKBH6	6:45384956-45390244	999	0.7665	0.280116	1.29883	1.47828	1.70581	1.76676	1.70514	0.849904	1.14781	0.0428454	0.233928	0.443673
ENSSSCT00000003220	ENSSSCG00000002915	KIRREL2	6:45275942-45283443	2130	0.00906992	0	0.00895496	0.210071	0.0614222	0.587161	0.109772	0.0272994	0.0525441	0.00913718	0.00902297	0.00903164
ENSSSCT00000003221	ENSSSCG00000002916	APLP1	6:45285781-45295347	2099	0.0667401	0.0002198	2.61285e-05	0.304219	0.0813833	0.355461	9.74573e-06	9.3285e-06	5.16476e-06	0.0463294	3.14047e-06	6.43152e-05
ENSSSCT00000003222	ENSSSCG00000002917	NFKBID	6:45296038-45304565	4121	0.0448466	0.0565478	0.0982268	0.115905	0.141625	0.0952093	0.0562547	0.0832343	0.128045	2.21929e-105	0.0129669	0.00907774
ENSSSCT00000003223	ENSSSCG00000002918	HCST	6:45307535-45309051	458	0.007896	0	0	0.00695688	0.00667414	0.380427	0.572377	0.125248	0.369723	0	0.00774055	0.176355
ENSSSCT00000003224	ENSSSCG00000002919	TYROBP	6:45309200-45312539	559	0.760781	0.225418	1.86864	4.06407	6.21883	3.51831	4.95977	2.12617	2.16832	0.583969	1.30627	2.55831
ENSSSCT00000003226	ENSSSCG00000002921	CLIP3	6:45390658-45405687	3355	0.0985099	0.267675	0.0833681	0.508786	0.342217	0.345265	0.160325	0.0204466	0.0682742	0.0649517	0.0288794	0.00775628
ENSSSCT00000003228	ENSSSCG00000002923	WDR62	6:45418860-45473977	5262	0.22766	0.109544	0.368258	0.215038	0.255674	0.354419	0.266995	0.160925	0.22169	0.0741391	0.170423	0.132745
ENSSSCT00000003232	ENSSSCG00000002926	TBCB	6:45482535-45492627	975	3.35352	2.49719	10.9625	9.00832	9.12161	10.6473	8.82238	6.08825	6.81557	1.54365	2.21156	2.65293
ENSSSCT00000003233	ENSSSCG00000002927	LRFN3	6:45346636-45351832	1872	0.020873	0	0.0515815	0.0100866	0.0404584	0.0820575	0.158104	0.104824	0.100937	0.0315373	0.0623226	0.0415534
ENSSSCT00000003235	ENSSSCG00000002929	SYNE4	6:45380247-45383267	912	0	4.9578e-05	5.15958e-05	4.73908e-05	4.00841e-05	4.0471e-08	2.63573e-10	0	4.81467e-05	0	0	5.03811e-05
ENSSSCT00000003237	ENSSSCG00000002930	ZNF260	6:45859483-45880311	3659	2.70266e-06	0.0499854	0.106689	0.187596	0.351314	0.434635	0.323167	0.133636	0.196571	0.0556635	0.126652	2.15078e-05
ENSSSCT00000003238	ENSSSCG00000002931	ZNF565	6:45544146-45577294	2007	0.0527664	0.11709	0.361757	0.11639	0.0434868	0.106316	0.199836	9.20175e-22	0.104771	0.0734775	0.01797	0.0311383
ENSSSCT00000003239	ENSSSCG00000026961	-	6:46823972-46842870	1514	0.237504	0.0931376	0.549096	0.79085	1.02673	0.768225	0.253885	0.265652	0.601818	0.186025	0.118298	0.118052
ENSSSCT00000003240	ENSSSCG00000036748	-	3:46071785-46080689	1203	0	0	0	0.047948	0	0.0211657	0.0174142	9.5179e-06	0.00807866	0	0.0170845	0
ENSSSCT00000003241	ENSSSCG00000025590	ZNF571	6:46541978-46550035	2090	0.0123858	0.0933743	9.68722e-05	0.000574874	0.000889108	2.47328e-05	4.21273e-06	0.0678749	3.13183e-05	0.0364753	1.16579e-05	5.04428e-07
ENSSSCT00000003242	ENSSSCG00000029170	ZNF566	6:45894253-45927769	2038	0.142712	0.0863337	0.310083	0.927774	1.16034	0.582463	0.631636	0.571261	0.753661	2.02494e-05	0.142462	2.12017e-05
ENSSSCT00000003245	ENSSSCG00000002932	ZNF567	6:45709661-45737832	3477	0.113129	0.157607	0.286313	1.47065	1.39528	0.819918	0.503455	0.334111	0.497103	0.0922941	0.0802916	0.161102
ENSSSCT00000003246	ENSSSCG00000002933	ZNF382	6:45777392-45786795	1614	0.029603	0.000208917	0.0100355	0.315572	0.227952	0.000114464	1.21626e-05	0.000576363	7.21357e-27	0.0148355	3.50636e-09	3.8104e-32
ENSSSCT00000003248	ENSSSCG00000002935	ZNF568	6:46094409-46121776	2578	0.0368032	2.24731e-06	0.18062	0.25633	0.401762	0.213898	0.129253	0.153905	0.183388	0.00117188	0.0686698	0.0585947
ENSSSCT00000003249	ENSSSCG00000021946	ZNF383	6:46121996-46134099	1275	1.34402e-17	9.8451e-10	0.00143329	0.00333077	1.00901e-05	0.182101	0.0957153	0.121736	1.16356e-16	0.0251054	1.8939e-103	0
ENSSSCT00000003253	ENSSSCG00000030256	ZNF790	6:46642039-46643808	1488	0	0	0.0266661	0.0652239	0.0654495	0.0531229	0.0408845	0.0406366	0.0391793	0	0	0.0133798
ENSSSCT00000003256	ENSSSCG00000025590	ZNF571	6:46541827-46555683	2283	0.0897365	8.85246e-06	0.348724	0.470238	0.723246	0.508784	0.198761	0.233724	0.349125	0.0261926	0.100442	0.108971
ENSSSCT00000003257	ENSSSCG00000029420	ZNF569	6:46377295-46425611	2127	0.272513	0.219908	0.690592	2.06011	1.95975	1.47017	0.943662	1.16656	1.3244	0.192173	0.298213	0.25327
ENSSSCT00000003258	ENSSSCG00000029875	ZNF461	6:45752919-45832009	1865	4.77279e-11	0.00179188	0.0557082	0.0627338	0.624908	0.168574	0.212964	0.112857	0.000542323	0.051178	0.0109771	2.57044e-18
ENSSSCT00000003259	ENSSSCG00000025590	ZNF571	6:46541978-46548579	1956	8.17848e-11	2.09005e-08	1.62286e-11	2.24346e-22	9.67949e-18	0.090943	0.0458858	1.31029e-06	1.38151e-34	8.32986e-08	3.47267e-17	8.20743e-10
ENSSSCT00000003260	ENSSSCG00000002938	ZNF585B	6:46209121-46229060	3430	0.142077	0.0992304	0.371126	0.830005	0.878749	0.703826	0.41737	0.284267	0.357209	0.0550704	0.0434387	0.103495
ENSSSCT00000003272	ENSSSCG00000002950	SIPA1L3	6:47036379-47137473	5259	0.00204564	0.00206245	0.00078621	0.00196004	0.00196739	0.525763	0.530374	0.00206098	0.735352	0.00207766	0.496909	0.571346
ENSSSCT00000003274	ENSSSCG00000002952	YIF1B	6:47224560-47238898	1019	2.10535	1.85956	7.24024	5.24973	5.9521	6.41555	5.60767	4.34628	3.72347	0.523133	1.66505	1.75427
ENSSSCT00000003275	ENSSSCG00000002953	-	6:47223437-47224226	407	3.82836	1.45399	5.12417	9.41083	11.8533	5.84194	1.86341	1.21997	3.31929	0.216922	0.806893	0.777129
ENSSSCT00000003277	ENSSSCG00000002954	SPINT2	6:47172646-47210040	663	1.55204e-26	0.00428554	0.10333	0.252018	0.0209789	2.30786e-05	3.97457e-18	3.01767e-07	0.0204279	0	0.0760992	0.182436
ENSSSCT00000003278	ENSSSCG00000002955	CATSPERG	6:47253307-47282607	3417	4.84627e-07	0.027672	3.86782e-05	4.75881e-07	0.0211321	0.0401466	1.88886e-05	0.0156762	1.87688e-05	0.00829333	0.00545155	3.38532e-07
ENSSSCT00000003280	ENSSSCG00000002957	GGN	6:47297574-47301539	2314	3.87272e-08	2.54673e-06	1.85981e-07	1.06722e-07	0.0512618	0.0466624	0.0461222	7.08162e-08	5.46824e-06	6.77992e-07	0.0307999	3.58813e-07
ENSSSCT00000003282	ENSSSCG00000002959	FAM98C	6:47315416-47319485	1290	0.474306	0.271048	1.50724	1.16804	1.55846	1.34685	4.02933	2.24875	4.94082	0.493412	0.677809	0.659942
ENSSSCT00000003283	ENSSSCG00000002960	RASGRP4	6:47320706-47333240	2153	2.55063e-07	2.20067e-17	2.44242e-08	1.49226e-05	0.0837818	2.01396e-09	0.0917836	7.37428e-07	9.44853e-23	0	7.61344e-07	1.40356e-06
ENSSSCT00000003286	ENSSSCG00000002962	MAP4K1	6:47458632-47474972	2355	0.0325607	0.00796399	0.0318808	1.17175e-06	0.0755054	0.0954371	0.0387636	0.0813486	1.57972e-06	0.0407393	0.0887933	2.21814e-05
ENSSSCT00000003287	ENSSSCG00000002963	EIF3K	6:47476284-47487906	771	9.82658	9.6923	28.9723	44.1082	39.7777	41.6921	32.6268	16.0395	25.3839	4.72511	8.06358	8.76556
ENSSSCT00000003289	ENSSSCG00000002965	ACTN4	6:47493956-47565993	3928	5.12158	3.23979	5.57596	5.48261	5.02111	5.64537	5.36047	2.94141	3.29966	0.983825	2.46773	3.42704
ENSSSCT00000003297	ENSSSCG00000002972	-	6:47717679-47728296	1566	0.559124	0.358857	1.35923	1.21882	1.11167	1.1528	0.874666	0.664902	0.65318	0.0767811	0.164536	0.341292
ENSSSCT00000003308	ENSSSCG00000021947	-	14:132259061-132266058	706	0	0	0	0.0323897	0	0	0	0	0	0	0	0
ENSSSCT00000003309	ENSSSCG00000002980	-	14:132240915-132247816	465	0	0	0	0.190501	0	0.061823	0	0	0	0	0	0
ENSSSCT00000003311	ENSSSCG00000002981	DMBT1	14:132187147-132230899	4029	0	0	1.50532e-06	1.49831e-06	1.38307e-06	1.39538e-06	1.95531e-07	5.29073e-07	0	0	1.57449e-06	1.44839e-06
ENSSSCT00000003314	ENSSSCG00000002983	LGALS13	6:48204575-48210071	1331	0	0	0.0151436	0	0	0	0	0	0.0148431	0	0	0
ENSSSCT00000003317	ENSSSCG00000002986	SELENOV	6:48162427-48167437	1216	0	0	0	0.0329306	0	0	0	0	0	0	0	0
ENSSSCT00000003319	ENSSSCG00000002988	ZNF546	6:48418815-48430098	3548	0.0255121	2.27948e-12	0.000362666	8.00727e-06	2.49778e-06	2.03018e-11	0.0878111	9.16208e-05	0.0183762	1.14496e-15	4.7508e-05	1.75277e-08
ENSSSCT00000003320	ENSSSCG00000002989	AKT2	6:48559823-48588760	3344	4.13896	3.32757	8.70305	5.25093	5.55252	4.10329	2.94305	2.15979	4.61888	1.68387	3.93808	3.98676
ENSSSCT00000003321	ENSSSCG00000002990	CNTD2	6:48550615-48553929	861	0	0.0256879	0.0510336	0.0500638	0.0503753	0	0.0261251	0	0.0251059	0	0	0
ENSSSCT00000003322	ENSSSCG00000002991	TTC9B	6:48543541-48547509	2603	0.226737	0.118052	0.411001	0.288853	0.409472	0.336327	0.493386	0.439671	0.662411	0.0884357	0.283611	0.196747
ENSSSCT00000003325	ENSSSCG00000002993	CYP2A19	6:49056670-49064085	1467	0.137869	0.119831	0.260849	0.624223	0.088915	0.0764246	0.0421187	0.291183	0.00178147	0.00758127	0.0210482	0.118933
ENSSSCT00000003326	ENSSSCG00000002994	CYP2F1	6:49016325-49031204	2568	0.096465	0.0598835	0.168268	0.0857808	0.0214903	0.050827	0.0298871	0.0371749	0.200207	0	0.029512	0.0961036
ENSSSCT00000003327	ENSSSCG00000002995	-	6:49002300-49009453	1140	3.26918	1.46306	6.78761	9.36574	9.87664	8.53062	8.84369	5.68323	7.55876	1.58299	2.37932	2.80288
ENSSSCT00000003328	ENSSSCG00000002996	-	6:48989554-48999608	1424	0.21618	0.419092	1.01123	0.765562	1.07252	1.25435	1.60185	0.86668	0.490934	0.133212	0.0154856	0.165167
ENSSSCT00000003329	ENSSSCG00000002997	-	6:48986931-48988366	393	0	0	0	1.65911e-06	0.0809606	0.0830613	0.247896	0	0.0803679	0	0	0
ENSSSCT00000003330	ENSSSCG00000002998	SNRPA	6:48971867-48982369	848	0.467324	0.549625	1.45654	1.14831	1.33535	1.74914	2.74304	0.844999	1.43334	0.287212	0.675248	0.92619
ENSSSCT00000003332	ENSSSCG00000003000	ITPKC	6:48942973-48961783	4035	0.604095	0.372185	1.32441	1.00539	1.32625	1.30328	0.79644	0.308876	0.575691	0.0929542	0.306919	0.308057
ENSSSCT00000003339	ENSSSCG00000003006	CYP2B22	6:49110788-49178413	2899	2.57998e-06	8.4609e-05	6.50319e-06	0.271486	0.0915233	6.79277e-06	0	0.0220325	0.443194	4.86831e-06	2.95578e-26	9.81024e-06
ENSSSCT00000003340	ENSSSCG00000028794	-	6:49382202-49398742	1809	3.74865	2.32558	10.5722	14.862	16.7547	14.9422	12.2182	8.70491	10.8009	1.95011	3.34591	3.6101
ENSSSCT00000003344	ENSSSCG00000003011	-	6:50104510-50134816	1221	0.117866	0.0679197	0.0669438	0.0163863	0.0329112	0.0167045	0	0	0.0656536	0	0.0335869	0.0501885
ENSSSCT00000003345	ENSSSCG00000003012	-	6:49481905-49485896	504	0.11273	0.0522709	0.0965598	0	0	0.0649362	0.0546598	0.215658	0.18456	0.104113	0.104717	4.04365e-06
ENSSSCT00000003346	ENSSSCG00000003013	B9D2	6:49349709-49358404	1035	0.71456	0.761658	2.05585	3.25113	4.22976	2.95236	1.77017	1.2403	0.719612	0.184893	0.7135	0.526851
ENSSSCT00000003347	ENSSSCG00000028794	-	6:49367760-49371126	519	0	0.050093	0	0.22696	0.0582653	0.115527	2.05648e-142	2.85533e-133	0.110234	0.0498957	0	0.0594488
ENSSSCT00000003348	ENSSSCG00000003015	EXOSC5	6:49373371-49377133	1535	0.316922	0.220778	1.0789	0.669677	0.658112	0.612055	0.666334	0.485874	0.972957	0.0517243	0.216779	0.173957
ENSSSCT00000003349	ENSSSCG00000003016	CCDC97	6:49318628-49328876	3973	0.349302	0.218502	0.274355	0.150325	0.133797	0.25448	0.188719	0.0870561	0.150459	0.14077	0.207539	0.0697817
ENSSSCT00000003352	ENSSSCG00000003018	LIPE	6:49549302-49560135	2865	3.85857	2.0568	4.47396	6.80728	15.0656	6.27963	0.508463	0.638929	0.832724	0.119518	0.358493	0.671394
ENSSSCT00000003355	ENSSSCG00000003021	MEGF8	6:49577410-49618688	8867	2.10574	0.950484	3.58942	1.98943	1.88697	2.25783	1.47185	1.0197	1.64259	0.386917	0.839283	1.11813
ENSSSCT00000003356	ENSSSCG00000003022	TMEM145	6:49619547-49628070	2574	0.0291462	0.134208	0.0608988	6.76032e-07	0.0497202	0.0218129	3.4372e-06	2.37392e-05	0.0495755	0.0547065	7.20995e-07	0.0564395
ENSSSCT00000003358	ENSSSCG00000003024	PRR19	6:49630832-49632808	1189	0.034723	0.0525224	0.0175393	0.118337	0.0353738	0.017237	0.0307477	0.0535727	0.101607	0.0349511	0.0692739	0.034494
ENSSSCT00000003359	ENSSSCG00000029070	PAFAH1B3	6:49635624-49638171	974	0.345961	0.159892	1.30289	1.32939	1.50268	1.31935	1.57535	0.694108	0.471435	0.0725374	0.160482	0.240305
ENSSSCT00000003361	ENSSSCG00000003030	CIC	6:49638990-49651615	6110	0.72675	0.511834	1.08936	0.893505	0.67363	0.866457	0.884616	0.265218	0.753849	0.278372	0.361153	0.418974
ENSSSCT00000003369	ENSSSCG00000003022	TMEM145	6:49619546-49628239	2448	0.219153	0.00808336	0.189899	0.143001	0.121001	0.206355	0.094396	0.0547661	0.0304855	0.0209679	0.0388287	0.0649299
ENSSSCT00000003371	ENSSSCG00000003035	-	6:49690392-49701580	1449	2.50221	2.09305	2.91574	3.0662	3.1392	2.8052	2.23694	1.67841	2.57919	1.01079	1.94367	1.69469
ENSSSCT00000003373	ENSSSCG00000003037	ZNF574	6:49834903-49837595	2658	0.658083	0.512325	1.6781	0.930003	1.12519	1.11948	1.38254	1.07484	1.54346	0.353168	0.540482	0.62716
ENSSSCT00000003374	ENSSSCG00000003038	GRIK5	6:49849237-49901079	2943	0.0385238	0.0259086	0.0632491	0.037072	0.0371418	0.050189	0.045211	0.0835654	0.0432557	0	0.0382913	0.0255937
ENSSSCT00000003376	ENSSSCG00000015131	GRIK4	9:47829632-48095342	2448	4.62684e-09	0.000180943	7.63531e-09	2.02451e-06	1.81767e-06	7.93973e-07	4.14137e-05	0.0106986	1.11463e-05	3.66874e-18	0.00011659	1.36815e-09
ENSSSCT00000003377	ENSSSCG00000003040	ARHGEF1	6:49975960-49993539	3534	0.172668	0.101475	0.238351	0.41363	0.494551	0.349927	0.325779	0.0833689	0.326719	0.143554	0.225164	0.277461
ENSSSCT00000003379	ENSSSCG00000003042	RPS19	6:50001040-50010060	2669	13.5553	10.927	53.2145	78.3037	70.2366	74.6752	57.0839	21.1983	32.2355	4.44065	8.11468	9.9202
ENSSSCT00000003381	ENSSSCG00000003044	LYPD4	6:50010557-50023571	942	0	0.0230304	0.114113	0	0.0225011	0	0	0	0	0.0229802	0	0
ENSSSCT00000003383	ENSSSCG00000003046	RABAC1	6:49933587-49936595	935	9.84201	7.55241	28.86	35.1161	40.7426	33.7386	35.9029	18.2658	21.7582	4.05775	7.62454	9.21247
ENSSSCT00000003384	ENSSSCG00000038419	-	6:50110506-50139104	2400	0	5.5393e-07	0	0	0	0	0	0	0	0	0	0
ENSSSCT00000003386	ENSSSCG00000003049	-	6:49970463-49973596	276	0.152173	0	0.168769	0	0	0	0	0	0	0	0	0
ENSSSCT00000003388	ENSSSCG00000003051	-	6:50246563-50255713	1317	0.0154414	0.0155722	0.0153293	0.0150044	0	0.0458624	0.0156728	0	0	0	0	0
ENSSSCT00000003391	ENSSSCG00000003054	ZNF575	6:50397305-50398505	726	0.063072	0.286204	1.35792e-06	0.0623728	0.000146094	5.27398e-07	0.097625	0.0322089	0.125269	4.99535e-07	0.0315935	0.0311744
ENSSSCT00000003392	ENSSSCG00000003055	XRCC1	6:50403692-50419297	2462	0.360847	0.376849	0.782998	1.26741	1.25855	1.1692	0.775718	0.305431	0.695005	0.104831	0.258986	0.0517343
ENSSSCT00000003396	ENSSSCG00000003059	ZNF428	6:50451146-50459786	925	1.00407	1.03583	5.08807	3.68454	4.14295	5.26252	4.8256	3.29417	3.53362	0.540257	1.4703	1.15782
ENSSSCT00000003398	ENSSSCG00000003061	CADM4	6:50461379-50478437	3247	0.306786	0.175185	0.52906	0.720862	1.11914	0.841956	0.864136	0.457585	0.584496	0.104999	0.174007	0.144236
ENSSSCT00000003399	ENSSSCG00000003062	LYPD3	6:50341158-50345734	2186	0	0	0.00870561	0	0	0	0	0	0	0	0	0
ENSSSCT00000003400	ENSSSCG00000003063	PHLDB3	6:50350149-50376370	2511	0.0625936	0.0187525	0.0207537	0.0666034	0.0407949	0.11322	0.0703493	0.0285944	4.34157e-05	0.0474843	0.034442	0.0309708
ENSSSCT00000003401	ENSSSCG00000003064	ETHE1	6:50375979-50394382	741	1.28966	0.433785	2.87581	3.40186	4.10018	2.95768	2.69159	0.753328	1.67685	0.367144	1.10779	0.547581
ENSSSCT00000003403	ENSSSCG00000003066	IRGC	6:50542123-50543636	1513	0	0	0.0261679	0.0512015	0.0385318	0.0651533	0	0.039878	0.0384438	0.0132973	0.0131544	0.0262672
ENSSSCT00000003405	ENSSSCG00000003068	SMG9	6:50539349-50569804	1928	0.100321	0.100018	3.25408e-07	0.000448127	0.0579411	0.000411527	0.12316	2.913e-06	4.98506e-07	3.08034e-07	0.00178941	0.196833
ENSSSCT00000003406	ENSSSCG00000003069	KCNN4	6:50579640-50593834	2651	0	0.00723612	0.00707077	0.0207252	0	0	0	0.00718586	0.0138199	0	0.0142633	0
ENSSSCT00000003407	ENSSSCG00000003070	-	6:50736927-50758262	2461	0.357742	0.25575	0.887652	0.951106	0.809262	0.864168	0.567088	0.680558	0.667887	0.148803	0.26239	0.260472
ENSSSCT00000003408	ENSSSCG00000003071	ZNF404	6:50698320-50721479	2364	0.072964	0.016356	0.207942	0.27355	0.383834	0.301753	0.212389	0.186933	0.172008	0.0326721	0.00806261	0.0403756
ENSSSCT00000003409	ENSSSCG00000003072	ZNF283	6:50650504-50678027	3022	0.530691	0.396801	1.30367	2.72117	2.85858	2.52495	1.67031	1.4812	1.67009	0.314576	0.409556	0.391995
ENSSSCT00000003410	ENSSSCG00000003073	LYPD5	6:50607022-50612462	1986	0	0	0.00966695	0	0	0	0	0	0.00945609	0	0	0
ENSSSCT00000003413	ENSSSCG00000038289	-	6:50777726-50785751	1707	1.15442e-17	7.09642e-06	2.31511e-06	0.183695	0.401987	0.237431	0.287024	0.103904	0.152707	0.0604981	1.4694e-05	0.0266338
ENSSSCT00000003414	ENSSSCG00000003077	ZNF112	6:50915620-50937422	2019	0.0206457	1.21725e-09	0.108515	0.000857146	0.000603048	7.04416e-07	3.63468e-26	0.00011216	1.06331e-05	1.37369e-06	0.089921	5.30643e-05
ENSSSCT00000003415	ENSSSCG00000003078	CEACAM19	6:51182431-51203807	1862	0	0.0211773	0	0	0.0203497	0	0.0106028	0.0105445	0.0609224	0	0	0
ENSSSCT00000003416	ENSSSCG00000003079	-	6:51161183-51180731	6890	0.0485529	0.11993	0.117874	0.0398361	0.0596391	1.66828e-06	0.0233755	1.21697e-06	0.0796444	0.0936803	1.64787e-06	0.136235
ENSSSCT00000003418	ENSSSCG00000003080	-	6:51133101-51150573	971	0.0220265	0.133247	0.0219913	0.0862266	0.260082	0.264236	0.405084	0.468959	0.151264	0.0221606	0.176043	0.284074
ENSSSCT00000003419	ENSSSCG00000003081	CEACAM16	6:51220878-51228654	1320	1.22281e-05	0.107163	0.580878	0.000107538	0.000223925	0.00237756	0.873933	0.605601	0.0435624	0.153566	0.228887	0.044498
ENSSSCT00000003421	ENSSSCG00000003083	CBLC	6:51276505-51292547	1695	0	0	2.3841e-133	0	0.0112983	0.0223647	0.197753	0.0868105	0.0595139	0.0303166	0	1.80157e-10
ENSSSCT00000003423	ENSSSCG00000003085	CLPTM1	6:51413601-51441229	1890	1.71961	2.2587	3.29334	3.56704	1.39231	0.513466	1.28016	1.68741	2.2408	0.335953	0.0125566	0.0100899
ENSSSCT00000003424	ENSSSCG00000003086	APOC2	6:51404279-51406445	636	0	0	0.0379668	0	0	0	0	0	0	0	0	0
ENSSSCT00000003426	ENSSSCG00000003088	APOE	6:51372240-51375617	1450	2.17441	2.41645	10.8058	38.8128	13.6037	5.51295	8.21051	1.65992	4.4119	1.64559	1.65595	5.56401
ENSSSCT00000003427	ENSSSCG00000003089	TOMM40	6:51360162-51369398	963	1.41299e-05	5.73278e-06	0.435583	7.02518e-06	0.0785604	0.350306	0.266407	4.709e-06	0.0951058	2.26964e-06	3.3222e-06	1.51959e-05
ENSSSCT00000003428	ENSSSCG00000003090	NECTIN2	6:51317419-51358657	3070	0.233901	0.283976	0.594036	1.08758	1.01895	0.693465	1.3416	0.291619	0.573503	0.197314	0.21866	0.48098
ENSSSCT00000003429	ENSSSCG00000003090	NECTIN2	6:51317448-51348350	1952	1.38501	0.685468	3.78087	1.70373	2.03598	2.46163	8.80442	3.67949	3.26642	0.81467	2.05554	1.6021
ENSSSCT00000003430	ENSSSCG00000003091	IRF2BP1	6:52197110-52198865	1755	1.7363	1.34453	4.01102	5.79685	5.82483	4.98182	5.00428	2.792	5.60639	0.823624	1.67275	1.81709
ENSSSCT00000003431	ENSSSCG00000003092	FOXA3	6:52180435-52190517	4341	0.111122	0.0301832	0.0798477	0.0451378	0.0205461	0.0457946	0	0.0341725	0.0656421	0.0215386	0.0339614	0.0170472
ENSSSCT00000003432	ENSSSCG00000003093	SYMPK	6:52139539-52180293	3929	2.57915	1.36319	4.29062	4.97322	4.44252	4.48267	3.29005	1.98142	4.23033	1.02735	1.48833	2.34458
ENSSSCT00000003437	ENSSSCG00000003098	PPP5C	6:52377978-52402047	2757	3.41269	2.1725	7.71622	6.0282	6.65746	6.84847	5.22098	3.14918	4.27351	0.977551	1.62106	1.77563
ENSSSCT00000003439	ENSSSCG00000003100	CCDC61	6:52294534-52318003	1981	0.316555	0.126736	1.34539	0.528667	0.461935	0.705865	0.207373	0.331942	0.370996	0.12666	0.0947628	0.406897
ENSSSCT00000003440	ENSSSCG00000003101	HIF3A	6:52345101-52373058	2019	3.6331	1.91959	2.38299	3.22047	1.52601	1.27371	0.174582	0.115767	0.585036	0.0677749	0.0956332	0.105263
ENSSSCT00000003441	ENSSSCG00000003102	PNMA8A	6:52429284-52431115	1284	0.0158946	0	0.189424	0.0154523	0.0620574	0.0787331	0.0161402	0.0160348	0	0	0	0
ENSSSCT00000003442	ENSSSCG00000003103	FKRP	6:52629045-52637396	2027	0.545181	0.187705	0.916643	0.849352	1.21374	0.625858	0.597344	0.475628	0.467733	0.0612355	0.228231	0.266971
ENSSSCT00000003443	ENSSSCG00000003104	STRN4	6:52601937-52627905	3325	5.68073	3.75023	11.5566	11.7934	11.8489	10.5193	11.363	8.81204	8.85383	2.51408	5.48243	5.5915
ENSSSCT00000003444	ENSSSCG00000003105	SLC1A5	6:52647437-52661464	2851	1.57371	0.750233	5.11611	6.25716	5.5008	4.91953	5.77901	1.80853	4.20615	0.722628	2.13197	1.7005
ENSSSCT00000003446	ENSSSCG00000003107	ARHGAP35	6:52711897-52841280	9022	3.88378	2.13963	4.46152	2.74877	2.22535	3.13032	2.28644	3.31409	3.24976	1.38767	2.93672	2.93141
ENSSSCT00000003447	ENSSSCG00000003108	NPAS1	6:52857753-52874626	1779	0	0	0.0109144	0.0213455	0.0107038	0.0217115	0	0	0.0106812	0	0	0
ENSSSCT00000003448	ENSSSCG00000003109	TMEM160	6:52874823-52877190	685	1.93903	0.857088	7.41313	3.81184	7.24434	6.82063	9.53397	5.78144	6.84322	0.922959	2.49073	1.78252
ENSSSCT00000003449	ENSSSCG00000003110	ZC3H4	6:52897810-52936960	3498	1.37042	0.896488	1.28553	1.08572	0.932883	1.04974	0.554064	0.680066	1.3378	0.431594	0.707433	0.635022
ENSSSCT00000003450	ENSSSCG00000003111	SAE1	6:52957468-53027134	2082	2.73928	1.77107	6.62177	5.48866	5.57448	6.81858	5.65353	3.28434	4.55209	1.27231	2.47871	2.3074
ENSSSCT00000003452	ENSSSCG00000003112	-	6:53038087-53042777	582	0.296202	0.170528	0.0860044	1.22806	0.941165	0.392498	0.220662	0.0436171	0.255494	0.0424848	0.0425568	0.0417358
ENSSSCT00000003453	ENSSSCG00000003113	C5AR2	6:53124495-53125509	1014	0.0836714	0.021091	0.0834575	0.0817879	0.246631	0.0417541	0	0	0.0409866	0	0.0208903	0.0207586
ENSSSCT00000003454	ENSSSCG00000003114	DHX34	6:53131254-53161346	4821	0.345751	0.202262	0.679789	0.709783	0.674171	0.659603	0.607274	0.396619	0.47518	0.0527503	0.255096	0.183824
ENSSSCT00000003455	ENSSSCG00000003115	MEIS3	6:53178919-53188339	1104	0.302788	0.152658	0.621832	0.94137	0.686168	0.583788	0.366225	0.133966	0.221934	0.038091	0.245531	0.131537
ENSSSCT00000003459	ENSSSCG00000003119	ZNF541	6:53280559-53306736	4017	0.0042403	0	2.66905e-12	1.49518e-07	0	1.59291e-24	0.0113046	0.00462071	0.0207837	0.00232917	0	0.00629735
ENSSSCT00000003460	ENSSSCG00000003119	ZNF541	6:53280047-53301274	4229	1.28436e-05	0	0.0388567	0.0126504	0	1.34627e-05	3.64006e-07	0.00438954	0.0277551	0	0	1.17873e-05
ENSSSCT00000003461	ENSSSCG00000003120	NAPA	6:53249329-53275306	1711	5.49486	3.57862	10.7251	12.1495	10.2074	9.3665	10.4587	6.35761	8.77976	2.40165	4.26653	4.16103
ENSSSCT00000003462	ENSSSCG00000003121	KPTN	6:53238656-53245526	1416	0.00966865	5.97746e-05	0.476997	0.298229	0.00103545	0.281519	0.000179063	0.000364619	6.48629e-05	0.000245996	0.0358998	1.72965e-05
ENSSSCT00000003469	ENSSSCG00000003128	LIG1	6:53620640-53651685	2649	0.208189	0.202774	0.64396	0.705229	0.581968	1.21485	0.939501	0.445883	0.338863	0.115737	0.371143	0.293254
ENSSSCT00000003470	ENSSSCG00000003129	ZSWIM9	6:53661293-53678302	1995	0.048685	0.00982161	0.0279822	0.037614	0.0942818	0.0191201	0.0589613	0.0195477	4.32458e-07	4.89832e-07	0.0290663	0.0273825
ENSSSCT00000003472	ENSSSCG00000003131	SYNGR4	6:53785653-53793666	705	0.0327705	0	0.0660506	0	0	0	0.067695	0	0.0325837	0	0	0
ENSSSCT00000003473	ENSSSCG00000003132	KDELR1	6:53794971-53803580	2020	1.75061	1.58078	3.43548	2.98742	3.35759	3.01085	1.66886	1.36346	1.29124	1.02798	1.2612	1.30302
ENSSSCT00000003474	ENSSSCG00000003133	GRIN2D	6:53809599-53847788	3996	0.00465829	0	0.0458194	0.0313201	0.0224049	0.0181602	0.00935551	0.00465714	0.013421	0	0	0.00928908
ENSSSCT00000003475	ENSSSCG00000003134	GRWD1	6:53849667-53859187	5138	1.00512	0.333194	2.54344	1.89764	1.38967	1.40776	1.69603	1.24426	2.70617	0.267757	0.844847	0.744684
ENSSSCT00000003476	ENSSSCG00000003135	KCNJ14	6:53862392-53866763	2674	0.063968	0.0215098	0.161131	0.171118	0.0960214	0.11818	0.0930094	0.106796	0.150617	0.0429701	0.0211987	0.0495709
ENSSSCT00000003477	ENSSSCG00000003136	-	6:53869934-53878853	1452	1.07074	0.751027	2.31339	3.8503	3.26248	3.21412	2.29355	1.33006	1.22988	0.437042	0.750809	0.912004
ENSSSCT00000003478	ENSSSCG00000003137	PLEKHA4	6:54144019-54170638	3031	0.622385	0.502295	1.44056	1.18563	1.94369	1.38007	1.50855	0.573171	0.814444	0.313591	0.408269	0.595457
ENSSSCT00000003479	ENSSSCG00000003138	HSD17B14	6:54125406-54143532	783	0.516056	0.260091	2.13042	0.989197	0.939172	0.926262	0.973141	0.789054	0.822445	0.1153	0.459276	0.255494
ENSSSCT00000003480	ENSSSCG00000003139	BCAT2	6:54107683-54123412	2554	0.0703234	0.332566	0.218748	0.397974	0.0957748	0.204849	1.15573	0.675052	0.092076	0.0667392	0.358501	0.515855
ENSSSCT00000003482	ENSSSCG00000003140	FGF21	6:54082605-54084606	907	0.43043	0.144649	2.72615	0.0469018	0.0471765	0.263696	7.17215	1.23833	21.9627	0.240538	0.286856	0.331944
ENSSSCT00000003484	ENSSSCG00000003142	IZUMO1	6:54072706-54076275	993	0.0643349	0.0864882	0.320999	0.0419486	0.253022	0.0856795	0.0656932	0.217316	0.126141	0.0215768	0.0214204	0.127671
ENSSSCT00000003486	ENSSSCG00000003143	MAMSTR	6:54052714-54057880	1424	3.85873	1.06913	6.62965	2.75675	3.74401	5.01412	4.48459	2.29248	6.74257	1.29512	1.42255	1.75679
ENSSSCT00000003487	ENSSSCG00000003144	BAX	6:54210653-54228144	1648	0.132982	0.183343	0.386183	0.385981	0.402071	0.541987	0.34386	0.170093	0.283729	0.0432725	0.306697	0.21972
ENSSSCT00000003489	ENSSSCG00000003145	FUT2	6:54034334-54044730	2486	0.291914	0.174357	0.602258	0.159153	0.137242	0.312072	0.147006	0.146275	0.273972	0.06192	0.0802066	0.23723
ENSSSCT00000003491	ENSSSCG00000003146	NTN5	6:54006886-54013639	1500	0.0533324	0.0403413	0.118911	0.258526	0.259413	0.197393	0.310604	0.0671148	0.0776456	0.0268523	0.0265651	0.0663025
ENSSSCT00000003492	ENSSSCG00000003147	CA11	6:53993392-54024826	1577	0.114445	0.0940903	0.489261	0.393841	0.162522	0.310792	0.891644	0.488632	0.259255	0.0804669	0.338429	0.112853
ENSSSCT00000003493	ENSSSCG00000003147	CA11	6:53989891-53998621	4589	0.0475133	0.0203329	0.0253638	0.0732034	0.0498682	0.0380172	3.06974e-40	0.0485389	0.154881	0.0463486	0.0316972	0.0487367
ENSSSCT00000003494	ENSSSCG00000003148	DBP	6:53986957-53993020	1911	0.674934	0.222132	1.03289	0.314063	0.394252	0.694986	1.65982	0.670604	0.875944	0.321112	0.224831	0.344238
ENSSSCT00000003495	ENSSSCG00000003149	TULP2	6:54177226-54185598	1461	0	0	1.12562e-10	0	0	0	0.013914	0.0414682	0	0	0.0136612	0
ENSSSCT00000003496	ENSSSCG00000003150	NUCB1	6:54188443-54209451	2188	3.96143	3.18294	7.55133	5.61787	6.65728	4.66738	5.30901	3.37104	2.9864	0.887463	1.61994	1.77551
ENSSSCT00000003499	ENSSSCG00000003152	RUVBL2	6:54250530-54263561	1766	0.517647	0.605771	3.92483	4.64981	3.34491	4.5831	4.1683	1.70265	3.14647	0.46046	0.190766	1.16795
ENSSSCT00000003500	ENSSSCG00000003153	FTL	6:54231120-54232753	933	18.695	18.1959	36.811	159.744	131.764	117.846	115.841	37.6948	49.2621	12.7626	25.4275	25.726
ENSSSCT00000003502	ENSSSCG00000003154	GYS1	6:54233052-54250260	4807	1.5976	0.801267	2.61097	0.0297638	6.38345e-38	0.110438	0.086195	3.43951	7.01289	1.02991	3.97976	1.5338
ENSSSCT00000003504	ENSSSCG00000003155	PPP1R15A	6:54172049-54175463	2307	2.42519	4.82505	7.25772	11.3374	7.93315	6.85373	3.03123	2.40148	1.5894	0.792543	1.56935	1.41124
ENSSSCT00000003506	ENSSSCG00000003156	HRC	6:54337487-54366064	2204	25.4293	16.798	63.3842	37.3335	36.9244	36.2137	54.1029	68.1281	53.8996	16.0635	25.9602	22.6475
ENSSSCT00000003507	ENSSSCG00000003157	LIN7B	6:54309535-54313138	757	5.10898e-06	0.180933	0.282828	0.438914	0.738242	0.11818	0.870529	0.715175	0.604078	0.631588	1.19043	0.880135
ENSSSCT00000003508	ENSSSCG00000003158	DHDH	6:54210608-54217287	1129	2.62248	1.99924	10.3258	5.9696	6.55569	8.93523	10.5961	5.93187	8.64682	1.3241	2.29518	2.70407
ENSSSCT00000003509	ENSSSCG00000003159	KCNA7	6:54278886-54286334	1434	1.44631	0.386763	2.39911	1.78205	2.24042	0.823369	0.866001	0.216312	0.524508	0.902489	1.29779	0.828868
ENSSSCT00000003510	ENSSSCG00000003160	NTF4	6:54271245-54274092	1189	2.51742	1.4181	4.74761	2.36675	1.64695	3.30951	1.8715	2.73554	2.47245	0.594168	1.22961	1.06931
ENSSSCT00000003511	ENSSSCG00000003161	PRRG2	6:54637562-54643738	573	0.086472	0	0.263845	1.21277	0.87532	1.02632	0.857577	0.133801	0.39204	0.0434059	0.304476	0.1279
ENSSSCT00000003515	ENSSSCG00000003165	-	6:54577413-54580846	1856	50.0778	38.4771	195.553	257.207	227.304	250.767	228.116	97.7574	134.034	20.1724	35.8706	46.4636
ENSSSCT00000003516	ENSSSCG00000003166	-	3:110594399-110594999	471	0.0573984	0.0577984	0	0	0	0	0	0	0	0	0	0
ENSSSCT00000003517	ENSSSCG00000003167	FLT3LG	6:54552623-54563806	1191	0.443318	0.365673	0.489928	0.742363	0.804894	0.421468	0.684765	0.310273	0.553785	0.156975	0.220441	0.447556
ENSSSCT00000003518	ENSSSCG00000003168	ALDH16A1	6:54528847-54546818	3603	0.803941	0.685131	2.55956	2.95403	3.22666	3.1325	2.57773	1.47033	1.51037	0.294403	0.587617	0.571005
ENSSSCT00000003519	ENSSSCG00000003169	PIH1D1	6:54524171-54537588	1516	0.855237	0.752699	2.33739	3.4282	3.27648	3.89189	2.59599	1.43655	1.87571	0.303763	0.612132	1.24239
ENSSSCT00000003520	ENSSSCG00000003170	SLC17A7	6:54511125-54521616	2971	0.0127134	0.00641266	0	0	0.0183844	0.00621057	0.00639398	0	0	0	0	0
ENSSSCT00000003522	ENSSSCG00000003172	CCDC155	6:54479769-54500887	1542	0	0	0.0128064	0	0	0	0	0	0	0	0	0
ENSSSCT00000003528	ENSSSCG00000003177	BCL2L12	6:54707236-54714066	971	0.393476	0.118934	1.16488	0.906294	1.25657	1.16651	1.06473	0.585409	0.476539	0.0357934	0.192543	0.0474574
ENSSSCT00000003530	ENSSSCG00000003178	IRF3	6:54701732-54706079	1259	1.02795	0.562114	2.42122	2.66922	2.97271	3.23829	2.95794	1.33003	1.76111	0.27997	0.82621	0.628114
ENSSSCT00000003535	ENSSSCG00000003183	RRAS	6:54680596-54684719	950	10.0848	6.10973	21.3673	16.7627	17.8355	19.3664	15.904	6.03208	10.2117	3.00275	4.56408	6.07817
ENSSSCT00000003540	ENSSSCG00000003187	FCGRT	6:54589861-54599190	1627	1.09336e-05	2.68223	9.86684	10.7204	12.0403	16.5002	22.052	8.91623	5.31944	0.000872525	3.31319	2.54462
ENSSSCT00000003541	ENSSSCG00000003187	FCGRT	6:54589581-54599190	1480	0.748056	0.253161	1.69828	0.182986	0.332445	0.232524	0.464056	0.182313	0.245392	0.366172	9.04551e-09	0.203118
ENSSSCT00000003542	ENSSSCG00000003187	FCGRT	6:54581132-54599190	1610	6.8203	1.94167	12.4353	22.892	20.9377	18.7805	12.1073	7.5729	13.5773	3.72227	4.20328	5.48596
ENSSSCT00000003544	ENSSSCG00000003189	PRMT1	6:54718842-54730597	1633	9.44719	4.86785	31.9969	22.7545	25.7669	27.0295	28.4831	18.8675	25.7161	5.69863	7.6895	7.47674
ENSSSCT00000003546	ENSSSCG00000003191	TSKS	6:54762191-54779753	1758	0	0	0	0.0108147	0	0.0110007	0	0	0	0	0	0
ENSSSCT00000003547	ENSSSCG00000003192	IL4I1	6:54906405-54945840	2111	0.0607522	0.011225	0.144714	5.76129e-209	0.0429745	0.0577811	0.0537918	0.0223361	0.0567859	0.0267783	0.0510562	0.0109142
ENSSSCT00000003548	ENSSSCG00000003193	TBC1D17	6:54889948-54906605	3516	1.22273	0.937925	2.61096	4.26798	3.52471	2.55439	2.00033	1.43613	1.74921	0.274142	0.608404	0.600638
ENSSSCT00000003549	ENSSSCG00000003194	AKT1S1	6:54881587-54889952	1743	4.31156	3.06234	6.47567	7.90489	7.95027	7.31927	4.22121	3.77761	5.75874	1.83024	2.87654	3.13372
ENSSSCT00000003550	ENSSSCG00000003195	PNKP	6:54867636-54880807	6696	1.29048	1.11719	3.14932	3.8524	3.63483	3.33622	2.75672	1.96501	2.46503	0.54571	0.952721	1.31739
ENSSSCT00000003551	ENSSSCG00000003196	PTOV1	6:54865791-54873312	1248	2.05422	0.797905	5.75462	4.38052	3.94736	5.26218	6.85214	4.69539	4.70115	0.782102	2.01967	2.07333
ENSSSCT00000003552	ENSSSCG00000003197	MED25	6:54834338-54852820	3129	0.535641	0.333933	0.776395	1.04783	0.945322	0.822812	0.659638	0.457786	0.561578	0.133429	0.275142	0.335906
ENSSSCT00000003553	ENSSSCG00000003198	FUZ	6:54820541-54829923	5289	0.227968	0.221555	0.740623	0.649879	0.5488	0.722009	0.796754	0.681744	0.541271	0.171169	0.200662	0.277994
ENSSSCT00000003554	ENSSSCG00000003199	AP2A1	6:54786698-54823541	2934	5.28288	3.13069	15.1393	8.77492	8.43724	6.48095	4.79508	4.62431	6.13661	1.44605	2.62634	2.43169
ENSSSCT00000003556	ENSSSCG00000003201	ATF5	6:54945128-54950141	1775	3.18668	1.0423	30.7423	0.125325	3.27105e-11	3.58583e-05	18.9234	2.31996	21.9306	1.3996	6.72632	3.23845
ENSSSCT00000003559	ENSSSCG00000003204	VRK3	6:54973730-55011330	2879	4.59014e-44	0.0659306	0.0479735	0.0472236	8.49949e-54	0.0398265	0.0241942	0.0491386	0.0406199	6.21616e-90	1.94217e-65	4.92244e-88
ENSSSCT00000003562	ENSSSCG00000003207	IZUMO2	6:55059770-55069392	627	0	0	0	0.114291	0.0384494	0	0.15887	0	0.0382848	0	0	0
ENSSSCT00000003566	ENSSSCG00000003211	NR1H2	6:55238578-55245451	1853	0.988039	1.13289	3.47764	3.98455	4.46658	3.52502	5.14658	2.92549	4.71263	0.841042	1.50053	1.31117
ENSSSCT00000003567	ENSSSCG00000003212	NAPSA	6:55218450-55227256	4123	0.00447478	0.00652655	0.00732231	0.0996739	0.12576	0.0394742	6.35494e-07	6.36107e-08	6.93006e-07	0.0227228	0.0447551	4.26535e-33
ENSSSCT00000003569	ENSSSCG00000003214	KCNC3	6:55201015-55216875	5992	0.0346327	0.058736	0.0461798	0.0274094	0.029413	0.0306238	2.99594e-13	0.0152962	0.020558	7.9938e-06	5.7136e-24	0.0641843
ENSSSCT00000003572	ENSSSCG00000003216	POLD1	6:55247855-55272083	3301	0.434603	0.241242	0.656891	0.74496	0.73501	0.763519	0.634096	0.464397	0.403593	0.128902	0.312224	0.369892
ENSSSCT00000003573	ENSSSCG00000003217	JOSD2	6:55336555-55342538	772	1.0293	1.11761	4.08975	3.68471	7.02634	4.78257	3.99038	1.71996	1.56116	0.170681	0.75005	0.537196
ENSSSCT00000003574	ENSSSCG00000003218	MYBPC2	6:55282445-55310295	3756	14.9042	9.83421	45.9275	23.7836	48.7038	31.9167	118.933	80.9138	125.699	26.2158	70.5156	95.9342
ENSSSCT00000003575	ENSSSCG00000003218	MYBPC2	6:55281802-55310295	4107	31.4677	22.1537	93.5713	115.26	205.826	195.34	436.705	428.711	720.444	126.843	198.239	196.023
ENSSSCT00000003577	ENSSSCG00000003219	FAM71E1	6:55310728-55316171	645	0.331396	0.111316	0.3724	0.622652	0.591246	0.15054	0.0381891	0.113355	0.110397	0	0.0369657	0.254626
ENSSSCT00000003581	ENSSSCG00000003222	SYT3	6:55416001-55433288	3951	0	0.00951073	0	0.013583	0.00453448	0.0137829	0.00946707	0.00942524	0.0181083	0	0	0.00469959
ENSSSCT00000003584	ENSSSCG00000003225	-	6:55748708-55759778	2112	0.016761	0	0.00394891	0	7.88651e-08	0.00897945	0	0.00834816	1.31683e-05	0	0.00774694	0
ENSSSCT00000003585	ENSSSCG00000037466	-	6:55781904-55824239	2409	0.0397246	0.0240432	0.148897	0.0497771	0.103613	0.108923	0.100051	0.0915848	0.149382	0.0640379	0.0869098	0.158279
ENSSSCT00000003586	ENSSSCG00000003227	-	6:55839170-55847426	2733	0	0.00350245	0.005133	0.00668635	0	0	0	0	0	0	0	0
ENSSSCT00000003587	ENSSSCG00000003228	VSIG10L	6:58518923-58532304	2577	0.0165652	3.91489e-14	0.0480202	0.0498503	0.0159294	0.0289347	2.3143e-13	0.0222214	0.0159008	0	0.0293933	2.04724e-07
ENSSSCT00000003588	ENSSSCG00000003229	ETFB	6:58501810-58517647	1008	24.963	15.1229	64.4624	24.8787	55.709	58.0199	26.4049	20.0176	19.7544	1.6745	7.57405	5.5397
ENSSSCT00000003589	ENSSSCG00000003230	-	6:58499701-58501139	501	0.104711	0.0527294	0.26839	0.264898	0.053651	0	0	0	0	0	0.0528281	0
ENSSSCT00000003590	ENSSSCG00000003231	NKG7	6:58496088-58497827	1186	0.261184	0.0526758	0.259729	0.373025	0.442769	0.345774	0.301039	0.175875	0.390658	0.192792	0.138955	1.14161
ENSSSCT00000003592	ENSSSCG00000003233	ZNF175	6:58408876-58417422	2049	0.122964	0.0667869	0.476442	0.493129	0.668344	0.779775	0.515352	0.379716	0.438582	0.133399	0.169398	0.160102
ENSSSCT00000003593	ENSSSCG00000003234	-	6:58401167-58411624	1002	2.35071e-05	0	5.38146e-07	0.0622348	0.0834137	2.36656e-05	2.39092e-05	0	0	0	0	2.02556e-05
ENSSSCT00000003594	ENSSSCG00000003235	-	6:58392612-58396490	999	0.0922639	0.0858704	0.304499	0.187388	0.202325	0.26223	0.0978203	0.0755075	0.278256	0.0428459	0.0921535	0.169018
ENSSSCT00000003595	ENSSSCG00000003236	-	6:58365181-58384934	2008	0.0238321	0.0633896	0.0976003	0.230291	0.365958	0.169187	0.102397	0.116077	0.189272	0.0730454	7.0083e-13	0.128878
ENSSSCT00000003597	ENSSSCG00000003238	SPACA6	6:58321913-58331374	975	0.13151	0.022099	0.218813	0.193035	0.0862563	0.0657243	0	0.0222199	0.193502	0.0441043	0.06569	0.0869812
ENSSSCT00000003598	ENSSSCG00000003239	HAS1	6:58307113-58313486	2096	0.267646	0.18619	0.546807	0.124714	0.196471	0.0905469	0.0744783	0.0926077	0.0356514	0.0185949	0.0734551	0.091898
ENSSSCT00000003599	ENSSSCG00000003240	-	6:58273002-58283799	3297	0.125316	0.229858	0.560777	1.09545	0.779109	0.64495	0.280566	0.239378	0.208138	0.0344422	0.101888	0.0510988
ENSSSCT00000003600	ENSSSCG00000003241	ZNF614	6:58102158-58134682	2270	0.0791997	0.0443469	0.204366	0.0801905	0.172854	0.310618	0.14782	0.0857104	0.283508	5.46261e-06	0.134758	0.043806
ENSSSCT00000003603	ENSSSCG00000003243	-	6:58139200-58152151	2349	0.0121468	0.068365	0.135622	0.0100806	0.0907427	0.121159	0.182893	0.041775	0.107283	0.0196834	0.0838745	8.07272e-10
ENSSSCT00000003604	ENSSSCG00000032969	-	6:58189409-58201869	3210	0.0810754	0.0693999	0.138389	0.0992111	0.211589	0.240174	0.371198	0.222332	0.000394336	0.0683659	0.0280097	5.27667e-06
ENSSSCT00000003608	ENSSSCG00000003248	-	6:56297327-56302622	1839	0	0	0	0.0445772	0.0154742	0.0104619	0.0188118	0.00534507	0.00343153	0	0.00353064	0.00529593
ENSSSCT00000003611	ENSSSCG00000003251	NLRP12	6:56402632-56425405	4459	0.00415493	0.0083853	0.0163455	0.115717	0.0510733	0.0485768	3.76354e-05	0.0249219	0.0119668	1.94775e-06	0	0
ENSSSCT00000003612	ENSSSCG00000032113	-	6:56368881-56381217	2371	0.0134691	0	0.0239167	0.0419622	0.0533559	0.0377492	0.0230711	0.0405082	0.0740386	0.00814219	0.0381574	0.0402481
ENSSSCT00000003613	ENSSSCG00000003253	-	6:56236317-56244185	2562	2.5293	2.6176	3.13104	5.81784	4.25633	3.47626	3.86556	1.56494	1.17033	1.40017	2.66353	1.85805
ENSSSCT00000003615	ENSSSCG00000003255	CACNG8	6:56157205-56172240	1600	0.0248148	0.0125139	0.0368557	0.0360506	0.0361668	0.0244586	0.100443	0.0998538	0.156374	0.0624758	0.0988529	0.0246863
ENSSSCT00000003617	ENSSSCG00000003256	PRKCG	6:56212589-56234011	3879	0.0432434	0.0048474	0.00945334	0.00461577	0.00924561	0.00468386	0	0.0144126	0.00461522	0	0.00954664	0
ENSSSCT00000003618	ENSSSCG00000003257	CACNG6	6:56129833-56150799	1457	0.105551	2.79596e-06	0.218307	0.630483	0.317008	0.14625	0.12467	0.218773	0.228393	0.146014	0.0791954	0.0606271
ENSSSCT00000003620	ENSSSCG00000003259	OSCAR	6:56022237-56029886	1789	0.0219363	0.0110629	0.0488104	0.0318194	0.0319116	0.0755164	0.0221661	0.0220422	0.0557275	0	0	0.0254704
ENSSSCT00000003621	ENSSSCG00000033542	-	6:56075952-56096495	2879	0.0118777	0	0.0323728	0.0242563	0.0282638	0.068485	0.172208	0.0646045	0.0367748	0	0.00528253	0.00520867
ENSSSCT00000003622	ENSSSCG00000003261	-	6:56018222-56021198	334	37.7559	31.3758	99.9238	140.336	178.694	195.965	177.076	132.089	99.957	15.0132	32.3026	22.0385
ENSSSCT00000003623	ENSSSCG00000003262	TFPT	6:56011490-56018169	1244	1.39901	0.812189	4.4734	4.00628	3.52793	3.8265	3.9774	2.61135	4.62449	0.586232	0.965727	1.08956
ENSSSCT00000003624	ENSSSCG00000003263	PRPF31	6:55995094-56011441	1704	1.1534	0.670932	2.48244	2.20151	2.80568	2.17608	2.23271	1.31024	1.62919	0.430313	0.826527	0.720643
ENSSSCT00000003625	ENSSSCG00000003264	CNOT3	6:55975631-55991321	2943	0.538216	0.473307	0.444774	0.660612	0.5563	0.409431	0.496769	0.386458	0.181591	0.181682	0.129329	0.13905
ENSSSCT00000003626	ENSSSCG00000003265	LENG1	6:55970647-55976736	1869	0.501831	0.242542	0.857769	1.33379	1.13485	1.05837	0.918631	0.472542	0.728036	0.179025	0.27054	0.301789
ENSSSCT00000003627	ENSSSCG00000003266	TMC4	6:55955981-55970280	2354	0	0	0	0	0	0	0.0164127	0	0	0	0	0
ENSSSCT00000003628	ENSSSCG00000003267	MBOAT7	6:55939531-55955838	2719	0.502746	0.302888	0.873987	1.459	1.38782	0.935473	1.05067	0.475583	0.484187	0.189968	0.340144	0.549627
ENSSSCT00000003629	ENSSSCG00000003268	TSEN34	6:55930736-55939190	1389	0.0153143	0.358186	0.355529	2.78521	2.35678	2.18877	1.21057	0.492164	0.830343	0.061036	0.076756	0.185141
ENSSSCT00000003630	ENSSSCG00000003269	LENG9	6:58857799-58860278	2322	0.239673	0.208419	0.472944	0.701259	0.535138	0.323879	0.241535	0.149156	0.263073	0.0749388	0.106855	0.115242
ENSSSCT00000003632	ENSSSCG00000003271	TTYH1	6:58874774-58891448	2704	0.0351188	2.44102e-06	0.0272274	0.0440831	0.0892348	0.0507686	0.232796	0.00703533	0.0853349	0.0283092	0.0279309	0
ENSSSCT00000003633	ENSSSCG00000029231	-	6:58709126-58715056	1425	0	4.80871e-33	4.95257e-07	0	7.09957e-11	0.0422891	3.80946e-106	0.0142074	2.4416e-27	0	1.44887e-69	1.08941e-18
ENSSSCT00000003637	ENSSSCG00000034284	-	6:58941156-58949192	1669	0.130242	0.0431558	0.158873	0.496522	0.376892	0.198301	0.279597	0.166679	0.288573	0.137754	0.24758	0.596516
ENSSSCT00000003638	ENSSSCG00000026365	-	6:59215639-59233998	1155	0	0	0	6.82714e-07	9.1583e-07	0	0	0	0	0	8.26979e-07	0.0520854
ENSSSCT00000003639	ENSSSCG00000003277	-	6:59186264-59204520	2781	0	0	0	0	0.00328812	0	0	0	0	0	0	0
ENSSSCT00000003641	ENSSSCG00000003278	-	6:59167776-59174470	2177	0	0	2.37092e-07	2.67616e-07	0.0257374	0.0366831	0.0178636	0	1.84763e-07	0	1.18874e-07	9.90287e-08
ENSSSCT00000003643	ENSSSCG00000003286	-	6:59093560-59133531	2569	0	0	0	0	5.98957e-05	0	6.27934e-05	0	5.86406e-05	0	0	6.15771e-05
ENSSSCT00000003644	ENSSSCG00000022675	NCR1	6:59092654-59100390	2521	0	0	0	1.47533e-05	0.0146147	1.62601e-05	1.84963e-06	1.53515e-05	1.4788e-05	1.62892e-05	1.72195e-05	1.6428e-05
ENSSSCT00000003646	ENSSSCG00000029231	-	6:58743670-58752113	1698	3.63904e-40	0.000218896	3.43706e-08	0.000210061	6.59753e-16	0	8.92529e-82	0	4.40539e-23	3.2755e-06	0.000212978	4.31334e-20
ENSSSCT00000003649	ENSSSCG00000022675	NCR1	6:59092654-59100390	2367	0	0	0	0.0077892	1.7258e-07	0.00791255	0.065259	0.00809998	0.0546387	0.0244534	0.0080332	0.0322391
ENSSSCT00000003650	ENSSSCG00000003286	-	6:59101769-59133531	2488	0	0	0	0	0.00364401	0	0.00766547	0	0.00733754	0	0	0.0228744
ENSSSCT00000003652	ENSSSCG00000003288	HSPBP1	6:59452685-59464705	2329	0.462752	0.211471	1.55444	0.895008	0.469742	0.442756	0.774018	0.612699	0.831558	0.185383	0.286817	0.266859
ENSSSCT00000003653	ENSSSCG00000003289	ISOC2	6:59602102-59609640	1052	4.25052	2.65842	16.9802	12.2323	16.5042	13.3799	6.36856	3.9708	7.05875	0.921821	1.48913	1.51613
ENSSSCT00000003665	ENSSSCG00000003301	PPP6R1	6:59427900-59440973	2643	3.07281	2.02538	5.54727	5.32289	5.38939	4.78329	4.4916	3.66224	5.92722	1.14566	2.44689	2.74603
ENSSSCT00000003666	ENSSSCG00000003302	TMEM86B	6:59424133-59426774	1206	0.170794	0.223901	0.373547	0.282635	0.0667871	0.0677998	0	0.0517399	0.199844	0.0171921	0.0511066	0.0509044
ENSSSCT00000003670	ENSSSCG00000003306	HELZ2	6:59915642-59931611	8634	0	0	0	0	0	0	0	0	0.00403796	0	0	0
ENSSSCT00000003681	ENSSSCG00000003317	ZNF787	6:60423072-60446188	1650	0.355547	0.135915	0.700695	0.811656	0.723315	0.503002	0.471426	0.273803	0.550506	0.0838264	0.0750485	0.27533
ENSSSCT00000003683	ENSSSCG00000003318	GALP	6:60487516-60492109	359	0	0	0	0	0.385026	0.198074	0	0	0	0	0	0
ENSSSCT00000003688	ENSSSCG00000003322	ZNF582	6:60721484-60735772	2050	0.154172	0.150802	0.385246	1.07826	1.03525	1.07526	0.359302	0.372931	0.327904	0.038094	0.0752481	0.112954
ENSSSCT00000003690	ENSSSCG00000003324	-	6:60795979-60801387	1929	0	0	0	5.80451e-273	4.79732e-251	3.09592e-165	1.92511e-62	6.73792e-10	7.42571e-129	0	0	0
ENSSSCT00000003692	ENSSSCG00000003326	-	6:61284229-61307764	6143	0.60255	0.336918	1.35132	0.337165	0.62816	0.427709	0.308993	0.234572	0.623302	0.0982791	0.246531	0.362835
ENSSSCT00000003696	ENSSSCG00000003329	ACAP3	6:63575927-63593438	7415	0.231533	0.111832	0.469135	0.457897	0.668636	0.885415	0.752758	0.511304	0.516667	0.156432	0.242065	0.262942
ENSSSCT00000003697	ENSSSCG00000038351	-	6:63516375-63520039	726	3.16823e-05	8.94262e-10	0	0	0	0	0.0325484	0	2.04482e-05	0	0	7.5764e-34
ENSSSCT00000003698	ENSSSCG00000003331	TNFRSF4	6:63524076-63526641	849	0	0	0	0	0	0	0	0	2.35601e-25	0	1.07435e-10	0.0513809
ENSSSCT00000003699	ENSSSCG00000003332	SDF4	6:63529852-63544788	1583	2.99759	1.12504	9.98686	14.5242	12.1569	9.02335	12.8811	5.1346	7.79094	1.25656	3.50514	2.64615
ENSSSCT00000003700	ENSSSCG00000003333	C1QTNF12	6:63548863-63553332	1197	0.0172276	0	0.0685157	0.0503175	0.134759	0.119705	0.0875857	0.10439	0	0.017341	0.0343683	0.0171146
ENSSSCT00000003701	ENSSSCG00000003334	UBE2J2	6:63556139-63568014	1290	2.35572	1.72195	7.88161	8.37606	11.2178	7.26675	7.49681	4.97597	4.87925	1.48024	1.90732	1.20989
ENSSSCT00000003707	ENSSSCG00000003338	PUSL1	6:63593958-63596910	1275	0.464662	0.274691	1.49596	1.33981	0.844677	0.539807	0.943804	0.727464	1.60711	0.258084	0.255618	0.191079
ENSSSCT00000003708	ENSSSCG00000003339	INTS11	6:63593900-63607878	5185	0.0744228	0.060521	0.197564	0.372749	0.0958757	0.13314	0.233575	0.303402	0.407364	0.000246595	0.000224333	0.0913459
ENSSSCT00000003710	ENSSSCG00000003341	TAS1R3	6:63610524-63617831	6359	3.64581e-06	1.19347e-05	1.71799e-06	0.0253212	0.0140509	0.0243695	0.0479865	2.65613e-06	0.0623547	1.13608e-06	1.9548e-06	3.11621e-06
ENSSSCT00000003711	ENSSSCG00000003342	DVL1	6:63618652-63629279	2487	7.95507	4.70175	18.1281	19.6033	30.2987	20.0468	25.2704	15.6298	23.7798	4.34027	7.99443	8.53662
ENSSSCT00000003712	ENSSSCG00000003343	-	6:63706115-63722384	3349	0.846097	0.356125	1.67132	1.70242	1.32756	1.17573	0.872954	0.672737	1.42766	0.175052	0.356351	0.430062
ENSSSCT00000003713	ENSSSCG00000003344	VWA1	6:63695169-63700287	2464	1.0666	0.579278	2.8795	2.65849	4.25034	3.99273	4.79932	1.56381	1.43414	0.400633	0.746452	0.701528
ENSSSCT00000003715	ENSSSCG00000003346	ANKRD65	6:63680992-63682758	1161	0.017847	0	0.0177542	0.0173872	0.0523941	0.0709268	0.0363163	0	0.0348371	0	0.0178056	0.0177268
ENSSSCT00000003717	ENSSSCG00000003348	-	6:63727679-63755198	1962	3.07376	2.40033	7.13205	9.06992	8.91161	8.4425	8.20719	5.57467	6.81389	1.21854	2.38775	2.5961
ENSSSCT00000003719	ENSSSCG00000003350	MIB2	6:63789655-63800311	3069	4.11711	1.74967	10.3996	7.51472	9.43399	8.20199	7.03567	4.49745	6.09987	0.944058	2.19698	2.99501
ENSSSCT00000003720	ENSSSCG00000003351	MMP23B	6:63801964-63804238	1518	0.631507	0.464415	1.42084	2.29547	4.27381	5.37445	2.19167	1.11243	0.829834	0.556435	0.34075	0.641187
ENSSSCT00000003721	ENSSSCG00000003352	-	6:63805003-63819902	2609	2.30559	1.98725	2.79799	2.41756	2.0423	2.47695	1.77034	1.38886	1.93312	0.845434	1.30576	1.22121
ENSSSCT00000003722	ENSSSCG00000003353	-	6:63820805-63841674	5290	0.287246	0.168408	0.217124	0.759279	0.805767	0.678003	0.654953	0.136571	0.469151	0.0160768	0.117062	0.108987
ENSSSCT00000003723	ENSSSCG00000003354	CCNL2	6:63659190-63668040	2899	3.9436	2.86022	9.46939	12.0429	11.885	8.20212	4.44708	3.79117	6.16006	1.17061	1.68676	1.80608
ENSSSCT00000003725	ENSSSCG00000003356	MMEL1	6:64436816-64470592	2334	0.00821896	0	0	0.00792449	0	0	0.00828244	0	0.0475649	0	0	0.00818628
ENSSSCT00000003728	ENSSSCG00000003359	TPRG1L	6:65150890-65155308	2470	2.20452	1.22505	4.98897	6.18693	5.52806	3.75215	3.5216	1.87606	3.31811	0.514375	0.861477	1.20976
ENSSSCT00000003729	ENSSSCG00000003360	WRAP73	6:65151129-65167011	5564	0.0392011	0.0353096	0.104896	0.138426	0.131976	0.0920856	0.0733148	0.0434067	0.0917809	0.0106381	0.0426974	0.0191163
ENSSSCT00000003731	ENSSSCG00000003362	CEP104	6:65276662-65306798	2616	0.0548796	0.104812	1.13766e-08	0.0397203	0.160682	0.0338258	0.0654125	0.0029771	0.395037	0.0658752	0.0465883	3.48115e-05
ENSSSCT00000003736	ENSSSCG00000003366	CHD5	6:67017416-67069523	8946	0.021219	0.00288256	0.0359302	0.00584327	0.0175491	2.25085e-19	0.0550175	0.0178752	0.0261866	8.44436e-38	0.0302815	0.0150436
ENSSSCT00000003738	ENSSSCG00000003368	RNF207	6:67105762-67118145	5358	0.240645	0.124863	0.331036	0.0956332	0.0792415	0.0702373	0.01724	0.0137343	0.0263732	0.00346526	0.0204823	0.0102865
ENSSSCT00000003739	ENSSSCG00000003369	ICMT	6:67116944-67160510	4060	3.48877	2.12743	6.81178	7.78265	6.53877	7.09723	5.06922	3.73733	4.68769	1.00842	1.72017	1.73582
ENSSSCT00000003741	ENSSSCG00000003371	GPR153	6:67138960-67144398	1794	0.612337	0.297785	0.800182	2.19932	1.87694	2.06487	0.673977	0.417509	0.507929	0.110136	0.359192	0.391773
ENSSSCT00000003744	ENSSSCG00000003374	ESPN	6:67284277-67315783	2556	2.03925e-05	1.91646e-05	0.0147057	3.60811e-05	1.86767e-05	0	2.10696e-05	1.81547e-07	0	2.10541e-05	0.0113021	2.05179e-05
ENSSSCT00000003745	ENSSSCG00000003376	PLEKHG5	6:67316818-67352084	6246	0.236264	0.0645843	0.43354	0.123237	0.102138	0.140276	0.319438	0.205026	0.298639	0.0536748	0.113262	0.144493
ENSSSCT00000003746	ENSSSCG00000003376	PLEKHG5	6:67322120-67365701	3906	0.193332	0.142423	0.505219	0.711247	0.852494	0.622429	0.859806	0.310298	0.320137	0.100315	0.213945	0.193415
ENSSSCT00000003747	ENSSSCG00000003377	ACOT7	6:67152429-67253272	1417	0.454194	0.24195	0.798613	0.687697	1.28738	0.969935	0.402614	0.199816	0.193341	0.0286213	0.226614	0.16723
ENSSSCT00000003750	ENSSSCG00000003379	KLHL21	6:67420621-67434812	5135	4.81311	2.77587	7.84496	4.10427	5.47579	5.50862	3.6247	3.13225	6.19076	0.83634	1.70855	1.66222
ENSSSCT00000003751	ENSSSCG00000040001	TNFRSF25	6:67316825-67321407	1425	7.21869e-05	0.0228505	4.44598e-06	0.109732	7.64087e-09	1.96474e-06	5.06629e-06	1.42481e-06	1.26181e-06	2.67099e-08	8.72065e-06	8.69871e-07
ENSSSCT00000003753	ENSSSCG00000003382	TAS1R1	6:67397366-67409973	2535	0.0376174	1.14518e-274	0.126106	0.115976	0.123487	0.0589038	0.219714	0.20355	0.0725051	0.00758045	0.0598461	0.0524654
ENSSSCT00000003754	ENSSSCG00000003383	ZBTB48	6:67410549-67421216	5241	0.0277558	3.99528e-05	0.0987234	0.197081	0.307421	0.239008	0.000537012	0.0966576	0.000956269	1.66622e-06	0.0194886	0.0455654
ENSSSCT00000003755	ENSSSCG00000003384	DNAJC11	6:67463359-67529930	2257	2.70106	1.48695	6.13839	4.92263	4.47291	4.5513	4.2516	3.05057	5.04803	0.927112	2.05945	1.7057
ENSSSCT00000003756	ENSSSCG00000003385	PARK7	6:68628834-68646312	2295	8.00084	6.62709	27.0038	25.1639	28.5145	35.607	36.5825	22.6162	24.8591	5.58181	10.3632	8.41045
ENSSSCT00000003757	ENSSSCG00000003386	TNFRSF9	6:68590566-68609687	2166	0	0	0.00879239	0.00859388	0.00563005	0	0.00898145	0.0357409	6.26913e-07	0.00897286	0	0.0177394
ENSSSCT00000003759	ENSSSCG00000003388	SLC45A1	6:68933896-68952218	4267	0.0130528	0.0131687	0.017114	0.00417771	0.00418366	0.00847724	0	0	0	0.0043853	0	0.00433848
ENSSSCT00000003761	ENSSSCG00000003390	SLC2A7	6:69481118-69503994	5239	0.317297	0.229781	0.667728	0.491083	0.553944	0.495207	0.166027	0.423028	0.462331	0.103417	0.164531	0.229866
ENSSSCT00000003764	ENSSSCG00000003393	TMEM201	6:69973396-69998544	4071	1.54367	1.67885	1.95725	1.12578	2.22717	1.85642	0.571653	0.515833	0.542525	0.202598	0.461795	0.364236
ENSSSCT00000003766	ENSSSCG00000003395	PIK3CD	6:70026372-70095839	4927	0.132492	0.116357	0.221242	0.252343	0.0994877	0.136358	0.111902	0.0914766	0.138884	0.0443525	0.0403618	0.0766762
ENSSSCT00000003767	ENSSSCG00000003396	CLSTN1	6:70082967-70114379	7400	0.647037	0.3247	1.01254	1.25237	1.05549	1.14661	0.645048	0.438955	0.45806	0.104575	0.192969	0.302023
ENSSSCT00000003769	ENSSSCG00000003398	UBE4B	6:70345812-70462430	6105	1.4132	1.19422	1.7691	1.24492	1.5788	1.38847	0.361788	1.19062	1.15418	0.318237	0.861996	0.68513
ENSSSCT00000003771	ENSSSCG00000003399	RBP7	6:70313308-70326455	612	0.513606	0.0398086	1.7222	4.61164	3.70069	3.73018	0.369788	0.162524	0.0792354	0.317427	0.476371	0.155996
ENSSSCT00000003772	ENSSSCG00000003400	NMNAT1	6:70271405-70307406	3396	0.217837	0.12149	0.587096	0.502591	0.295943	0.49687	1.67743	1.61268	1.61216	0.175999	0.242935	0.209399
ENSSSCT00000003773	ENSSSCG00000003401	KIF1B	6:70511205-70659680	5313	0.0478818	0.000435561	0.245158	0.0384419	5.02294e-06	0.0396769	1.16519	0.621179	4.00404e-05	0.177	0.552709	0.0378506
ENSSSCT00000003774	ENSSSCG00000003402	PGD	6:70675886-70692285	1428	0.831309	0.667874	2.26337	3.06237	3.40269	2.2832	3.28484	1.91614	2.14906	0.539114	1.22148	1.16285
ENSSSCT00000003775	ENSSSCG00000027822	CORT	6:70716295-70718268	949	0	0	0	0	0	0.022654	0.0231462	0	0	0	0.0226233	0
ENSSSCT00000003776	ENSSSCG00000003403	CENPS	6:70701584-70712465	1592	0	0.0503351	0.0741275	0.44714	0.278852	0.725633	0.378791	0.677815	0.024194	0.0502594	0.0621295	0.111706
ENSSSCT00000003777	ENSSSCG00000003404	DFFA	6:70725417-70736269	1885	1.10829	0.940281	3.91087	3.32323	4.14544	3.14523	2.58363	1.67484	1.76293	0.375599	0.711292	0.680481
ENSSSCT00000003778	ENSSSCG00000003405	PEX14	6:70737904-70872072	1835	0.960003	0.499425	2.69983	1.7977	1.58101	2.063	2.24623	1.18494	1.65187	0.472743	0.433122	0.84936
ENSSSCT00000003780	ENSSSCG00000003407	CASZ1	6:70880373-70933883	4845	1.304e-05	1.13657e-09	0.0410121	1.97528e-05	7.87712e-06	0.0426121	4.42151e-19	0.000233118	1.36528e-06	7.0776e-05	3.90563e-06	0.0803345
ENSSSCT00000003785	ENSSSCG00000003412	EXOSC10	6:71256919-71282493	4934	0.673756	0.528696	1.53409	2.40646	2.26571	1.79977	1.36694	0.987207	1.72715	0.301831	0.557589	0.503958
ENSSSCT00000003786	ENSSSCG00000003413	MTOR	6:71286993-71448662	8705	2.38918	1.67919	5.99942	4.46259	4.26514	4.33856	2.75586	2.94162	4.08058	0.870653	1.33559	1.31208
ENSSSCT00000003787	ENSSSCG00000003414	ANGPTL7	6:71350985-71358671	3444	6.06122e-05	0.0931329	0.0963988	0.317397	0.172772	0.118388	0.0771087	0.0598738	0.0247214	0.0274158	0.0216243	0.00123431
ENSSSCT00000003790	ENSSSCG00000003417	DISP3	6:71583817-71640940	5462	0	0	0	0.00323278	0	0	0	0	0	0	0	0
ENSSSCT00000003793	ENSSSCG00000003419	MAD2L2	6:71773681-71779172	1101	0.800808	0.562874	2.67537	1.46107	1.68071	2.47736	2.31458	1.36637	2.23679	0.102233	0.965599	0.810721
ENSSSCT00000003794	ENSSSCG00000003420	FBXO6	6:71755358-71774261	2032	0.069599	6.63222e-26	8.8108e-05	0.370414	0.519632	0.149728	0.371657	0.481803	0.072931	0.0158309	0.0138573	0.194875
ENSSSCT00000003795	ENSSSCG00000003421	FBXO44	6:71747716-71754515	1866	1.33792e-05	0.0764433	0.37248	0.502603	0.385529	0.604887	0.728437	0.288672	0.312937	0.0733704	0.17672	0.0549357
ENSSSCT00000003797	ENSSSCG00000003423	DRAXIN	6:71798606-71814771	5973	0.00293838	0.0029646	0.0028879	0.0146117	5.66688e-08	0.00285645	0.0245255	0	0	0	0	0
ENSSSCT00000003798	ENSSSCG00000003423	DRAXIN	6:71798606-71814771	6063	0.00013365	0.000134843	0.000129715	0.000124772	0.00581172	0.000130753	0.000129424	0	0	0	0	0
ENSSSCT00000003805	ENSSSCG00000003428	MTHFR	6:71864744-71881832	5287	0.000103974	8.77212e-06	0.138123	0.448607	0.101436	0.485228	0.339952	0.0684643	0.186061	8.84932e-06	6.50092e-05	0.156737
ENSSSCT00000003807	ENSSSCG00000003429	CLCN6	6:71881924-71916023	5770	0.363127	0.39529	0.406795	0.281033	0.31806	0.359355	0.245937	0.159039	0.299255	0.0770608	0.154976	0.155686
ENSSSCT00000003810	ENSSSCG00000003432	KIAA2013	6:71976017-71981775	2515	2.33189	1.24734	6.29117	6.28382	7.5519	5.80485	6.53605	4.19588	3.96805	0.957286	2.24412	2.06534
ENSSSCT00000003811	ENSSSCG00000003433	PLOD1	6:71987932-72019707	4099	5.60918	3.95331	16.633	6.54491	6.6317	9.26843	10.1491	3.91568	3.81129	1.35613	2.80858	3.00473
ENSSSCT00000003812	ENSSSCG00000003434	MFN2	6:72027979-72056435	4674	3.61544	2.20874	6.47804	1.38215	5.69738	1.82206	1.17271	1.35667	1.86569	0.415719	1.44467	1.13766
ENSSSCT00000003813	ENSSSCG00000003435	MIIP	6:72064644-72075228	1807	1.56216	0.809712	4.54831	4.82504	6.117	3.16849	2.22501	0.904668	1.36464	0.174828	0.539921	0.637021
ENSSSCT00000003815	ENSSSCG00000003437	TNFRSF8	6:72129594-72171235	1682	0.0234781	0	0.0116168	0	0.0649919	4.0876e-05	0.0517359	0.0236061	1.70108e-07	0	0	0
ENSSSCT00000003816	ENSSSCG00000003438	VPS13D	6:72256821-72510055	13401	0.101683	0.137121	0.197081	0.205584	2.72743e-10	1.67535e-14	3.9192e-08	0.0813314	0.151943	0.000233249	8.03293e-05	9.09102e-08
ENSSSCT00000003817	ENSSSCG00000003439	DHRS3	6:72556233-72599238	2379	1.74735	1.58393	3.24088	2.15019	2.85521	1.67984	2.14188	1.07361	1.54527	1.08712	1.1051	1.42768
ENSSSCT00000003820	ENSSSCG00000003440	AADACL4	6:72632751-72650538	1233	0	0	0	0.0323996	0	0	0	0	0	0	0	0
ENSSSCT00000003830	ENSSSCG00000003449	LRRC38	6:72935777-72960988	885	2.36526	1.98709	3.37766	1.93451	2.74896	1.73083	0.100957	0	0.121249	0.0247816	0.0246356	0.0244244
ENSSSCT00000003832	ENSSSCG00000003451	-	6:73019056-73049996	2413	0.825424	1.18502	0.407059	0.738052	1.28544	0.263335	0.508079	0.200441	0.261497	0.119819	0.0498987	0.180041
ENSSSCT00000003834	ENSSSCG00000003453	-	6:73137756-73238288	792	0.791328	0.769179	2.29794	1.3924	1.45805	0.912522	1.45287	1.18075	1.11769	0.255743	0.565849	0.6717
ENSSSCT00000003836	ENSSSCG00000003455	FHAD1	6:74508096-74641442	4796	4.96407e-09	4.14018e-13	5.13832e-17	9.04043e-08	0.0451487	4.50479e-14	0.00576077	2.03917e-13	3.75623e-14	1.32155e-39	3.81013e-13	1.95878e-39
ENSSSCT00000003837	ENSSSCG00000003455	FHAD1	6:74508101-74629778	4373	1.94248e-06	0.0298693	0.0149088	5.68481e-10	0.00664194	0.0534766	0.0157819	0.0368011	0.0569196	1.44509e-94	0.0294081	3.81041e-94
ENSSSCT00000003841	ENSSSCG00000003458	EFHD2	6:74651796-74668434	2456	1.85997	1.27962	2.89355	3.40498	3.31471	2.65908	2.50849	1.46638	1.36542	0.439098	0.975085	1.63574
ENSSSCT00000003842	ENSSSCG00000027215	CTRC	6:74674835-74681311	892	0	0	0	0.023944	0	0	0.024992	0.0991528	0	0	0.0243982	0.0241926
ENSSSCT00000003844	ENSSSCG00000003459	CELA2A	6:74691652-74707598	919	0	0	0.023528	0.184566	0.255243	0.495186	0.794717	0.477799	0.0462644	0.0473492	0.070572	0.0233381
ENSSSCT00000003846	ENSSSCG00000003460	CASP9	6:74706333-74730046	3764	0.128911	0.0747369	0.375598	0.581171	0.729992	0.657467	0.468931	0.0836626	0.247689	1.46256e-05	0.123078	0.227367
ENSSSCT00000003847	ENSSSCG00000003461	RSC1A1	6:74809372-74851067	5342	2.09434	3.17565	5.15002	5.13833	12.0476	4.72056	4.22201	4.46878	8.58476	1.09898	1.80581	1.80375
ENSSSCT00000003849	ENSSSCG00000003463	AGMAT	6:74773016-74782781	1624	0.2632	0.237972	0.548311	0.282856	0.292138	0.311255	0.173271	0.254709	0.523318	0.0501867	0.165082	0.0860026
ENSSSCT00000003850	ENSSSCG00000003464	DNAJC16	6:74732370-74771402	5617	0.305204	0.259979	0.359885	0.55746	0.428641	0.382634	0.370227	0.397825	0.525407	0.169797	0.221136	0.128238
ENSSSCT00000003851	ENSSSCG00000003465	FBLIM1	6:74931819-74962280	2806	1.27387	0.773435	1.98262	2.09004	3.68305	1.58318	1.5724	0.754478	0.950168	0.261716	0.548243	0.708942
ENSSSCT00000003852	ENSSSCG00000003466	TMEM82	6:74915706-74920121	1434	1.46415e-222	1.65631e-240	0.0338851	0.0152406	0.0168019	3.99688e-147	0	2.04285e-151	4.66696e-112	0	5.06373e-220	0
ENSSSCT00000003854	ENSSSCG00000003468	PLEKHM2	6:74865130-74907766	4008	10.463	5.95735	21.3008	16.282	17.0633	14.738	15.3559	11.0365	14.016	3.01973	6.23511	6.58862
ENSSSCT00000003855	ENSSSCG00000026345	-	6:75179588-75192255	2064	0	0	0.00110474	0.00100404	0.000431034	0.00100479	0.00125547	0	0.00105677	0	0	0
ENSSSCT00000003856	ENSSSCG00000003470	FAM131C	6:75193400-75212086	1743	0.329701	0.147994	0.344737	0.386517	0.352228	0.509648	0.279132	0.15221	0.291737	0.0795755	0.102362	0.163921
ENSSSCT00000003857	ENSSSCG00000003471	EPHA2	6:75251460-75279314	4145	1.37043	1.02912	2.3987	1.05045	0.836407	1.01322	2.22996	0.737887	1.02445	0.207896	0.59521	0.573697
ENSSSCT00000003858	ENSSSCG00000003472	ARHGEF19	6:75317822-75335270	2990	0.0226341	0.00814205	0.0515057	0.0914206	0.14608	0.310557	0.205061	0.0691148	0.0564621	0.0208285	0.039453	0.0602076
ENSSSCT00000003859	ENSSSCG00000003473	CPLANE2	6:75345258-75349943	1324	6.40289e-05	6.46275e-05	6.08165e-05	5.65247e-05	6.60284e-05	6.12256e-05	6.51205e-05	0.201057	6.32373e-05	5.86694e-05	6.42371e-05	0
ENSSSCT00000003862	ENSSSCG00000003476	-	6:75485988-75517253	1950	3.1941e-06	0	6.91355e-08	3.02836e-06	0	0	3.15284e-06	0	6.54915e-08	0	3.23635e-06	3.37513e-06
ENSSSCT00000003863	ENSSSCG00000003477	NECAP2	6:75527068-75543245	2213	0.677541	0.546026	1.79024	3.00816	2.97242	2.41849	2.17598	0.707613	1.29695	0.286208	0.544353	0.573774
ENSSSCT00000003864	ENSSSCG00000003478	-	6:75559229-75605794	5898	0.337189	0.0139574	0.0673062	0.058476	0.150797	0.167471	0.168499	0.00839339	0.373067	0.0815261	0.250372	0.170762
ENSSSCT00000003865	ENSSSCG00000003479	MFAP2	6:75607520-75615423	1333	0.676521	0.586082	1.116	1.76077	2.88159	1.85542	2.16382	0.425905	0.281332	0.276014	0.716006	0.595585
ENSSSCT00000003869	ENSSSCG00000003483	-	6:75948917-75966025	1731	0	1.26283e-05	1.29285e-05	1.19999e-05	0.0331061	1.34775e-19	1.34317e-05	0.0228631	0	1.35248e-05	0	1.17156e-05
ENSSSCT00000003870	ENSSSCG00000003484	PADI6	6:75969885-75987096	2364	0	0	0.0239933	0.0468942	0	0.00794088	0.0653505	0.0243826	0.0234556	0.016336	0.0241878	0.0484508
ENSSSCT00000003871	ENSSSCG00000003485	RCC2	6:75988271-76014158	4068	0.203728	0.392479	1.51362	2.64992	1.78253	2.34134	2.14631	1.20071	1.52828	0.391843	0.439286	0.735373
ENSSSCT00000003872	ENSSSCG00000003486	ARHGEF10L	6:76117766-76229301	4330	0.000147549	0.225882	1.23965	0.548216	0.92731	0.17266	0.496737	6.13633e-05	1.0394	8.4889e-05	0.627091	0.00010738
ENSSSCT00000003874	ENSSSCG00000003488	UBR4	6:77568726-77707930	15547	5.61243	4.45416	12.6362	6.68153	6.10414	5.18346	4.17067	6.49389	8.33652	1.89459	3.81332	3.74401
ENSSSCT00000003876	ENSSSCG00000003489	EMC1	6:77724506-77747591	2932	0.581255	0.302348	2.26828	0.758651	0.21749	0.164111	0.341255	0.118179	0.910362	0.0570977	0.377197	0.429856
ENSSSCT00000003878	ENSSSCG00000003491	AKR7A2	6:77754172-77761667	1456	1.94378	1.2652	7.1337	6.36488	5.75668	6.05876	5.89501	3.26265	4.27065	0.707942	1.90922	1.53539
ENSSSCT00000003879	ENSSSCG00000003492	PQLC2	6:77761860-77778569	1811	0.891174	0.66325	1.71403	1.89885	1.11586	1.18742	0.804511	0.459136	0.871059	0.279647	0.250531	0.369301
ENSSSCT00000003880	ENSSSCG00000003493	CAPZB	6:77780685-77853538	1676	3.63327	2.40406	5.88083	3.17842	4.15145	4.24993	6.97074	4.49136	9.28481	4.27881	6.99059	4.78204
ENSSSCT00000003881	ENSSSCG00000003493	CAPZB	6:77784229-77872320	834	3.75456	1.28118	6.08806	2.78801	1.65118	3.70023	6.38384	2.43979	6.07028	2.90549	10.6156	4.92667
ENSSSCT00000003886	ENSSSCG00000003498	UBXN10	6:78456993-78465769	2954	0	0	0	0	0.00616573	0	0	0	0	0	0	0
ENSSSCT00000003892	ENSSSCG00000003503	VWA5B1	6:78569216-78609274	3534	0	0.0070619	0.0102144	0	2.90056e-05	0	0	0	0	0	0	0
ENSSSCT00000003894	ENSSSCG00000003505	DDOST	6:78885267-78895720	1596	3.67779	3.77716	12.8652	14.9183	16.4447	16.4965	11.3057	5.7333	6.55513	1.74164	2.93366	3.81834
ENSSSCT00000003896	ENSSSCG00000003506	PINK1	6:78863288-78886692	5025	8.88885	5.27332	19.8758	26.4004	28.2197	25.6811	14.7725	13.5396	19.0398	3.38024	5.08482	6.26054
ENSSSCT00000003898	ENSSSCG00000003508	KIF17	6:78898382-78952925	3042	0.0124002	0	0.00610651	0.0357902	0.0239039	0.0242249	0.0997681	0.0310311	0.0238621	0.0124958	0.00616224	0.0185371
ENSSSCT00000003899	ENSSSCG00000003509	SH2D5	6:78954508-78967384	3448	0.00543386	0	0.0160465	0.0104478	0.0104653	0	0.0109224	0	0.067913	0	0.00539942	0
ENSSSCT00000003901	ENSSSCG00000003511	HP1BP3	6:78975559-79007927	3356	0.000255832	0.460993	0.000232803	4.30703e-05	0.000126255	3.29051e-05	6.26411e-05	1.63658e-05	3.81954e-05	4.50497e-10	0.00332898	0.000196154
ENSSSCT00000003902	ENSSSCG00000003512	EIF4G3	6:79022990-79249227	5091	3.05003	1.3411	5.59864	2.18215	1.75795	3.60988	1.21748	0.647236	1.69591	0.460156	2.26921	1.99105
ENSSSCT00000003903	ENSSSCG00000003513	ECE1	6:79410668-79466047	2301	2.61218	1.56584	4.24089	5.96335	5.94487	7.49862	9.09244	3.33893	2.66485	1.1351	2.21622	1.86192
ENSSSCT00000003904	ENSSSCG00000003514	HSPG2	6:79850756-79921097	13013	11.6715	6.18267	20.5688	15.1771	15.6812	22.6099	28.1008	12.8898	15.9701	3.76317	11.7042	10.6112
ENSSSCT00000003906	ENSSSCG00000024197	USP48	6:79745450-79810724	3369	0.293138	0.120598	0.386189	0.746463	0.692612	1.41746	0.880801	0.580124	0.55003	0.161125	0.210954	0.247912
ENSSSCT00000003910	ENSSSCG00000003520	-	6:80035047-80090934	3846	1.9231	1.88304	4.74825	2.48587	2.92434	3.19916	1.81878	2.66136	2.53814	0.83601	0.686715	0.743105
ENSSSCT00000003912	ENSSSCG00000003521	-	6:80112276-80123081	1255	0.523544	0.247178	1.45437	4.33267e-05	0.279089	0.130031	0.555763	0.568329	0.490463	1.27253e-05	0.184351	0.181355
ENSSSCT00000003913	ENSSSCG00000026276	ZBTB40	6:80449467-80485378	5602	0.320424	0.141074	0.73338	0.26386	0.42465	0.467198	0.0659763	0.518239	0.642988	0.109017	0.238214	0.109256
ENSSSCT00000003914	ENSSSCG00000003523	EPHA8	6:80521571-80548696	2949	0	0	0	0	0	0.01252	0	0	0	0	0	0
ENSSSCT00000003915	ENSSSCG00000003524	C1QA	6:80586182-80589939	1772	0.918139	1.23329	3.66155	14.0865	18.1311	7.478	11.2386	3.52787	4.72058	2.70958	3.05361	7.53185
ENSSSCT00000003918	ENSSSCG00000003527	-	6:80650732-80843567	4012	0.339494	0.0811481	1.23602	0.495989	0.660206	0.682611	0.759252	0.278788	0.645965	0.120711	0.432679	0.516494
ENSSSCT00000003922	ENSSSCG00000003531	KDM1A	6:80903357-80971560	2630	0.105387	0.0863704	0.20189	0.25682	0.255557	0.293645	0.0508449	0.0949024	0.101487	0.0262467	0.0474451	0.0377071
ENSSSCT00000003923	ENSSSCG00000003531	KDM1A	6:80903427-80973632	4761	0.615208	0.628391	1.32373	1.30509	1.50852	1.17807	0.673476	0.608457	0.898399	0.275263	0.378761	0.296212
ENSSSCT00000003924	ENSSSCG00000003532	LUZP1	6:80973260-81066266	7441	0.424889	0.285681	1.15495	1.06479	0.40576	0.21189	1.00206	0.564291	0.353056	0.1448	0.605433	0.283789
ENSSSCT00000003931	ENSSSCG00000003539	GRHL3	6:82016754-82050236	2806	0.0067524	0	0	0.019502	0.0521083	0.0264056	0.00679467	0.00676191	0.0325089	0.0136093	0.0067123	0
ENSSSCT00000003933	ENSSSCG00000003541	STPG1	6:82053704-82102928	1008	0	0	0	0	0.020702	0	0	0	0	0	0.021039	0
ENSSSCT00000003934	ENSSSCG00000024818	RCAN3	6:82195571-82224268	929	9.83989e-46	0.197029	0.114885	0.0400774	1.51726e-19	8.24991e-28	0.0399735	7.31169e-31	2.74078e-65	0.0366045	1.39784e-45	0.0443242
ENSSSCT00000003935	ENSSSCG00000003543	NIPAL3	6:82111640-82198909	5300	0.434988	0.362452	1.2665	1.18803	1.23726	1.43301	1.19246	0.931173	0.911571	0.300955	0.454216	0.500787
ENSSSCT00000003939	ENSSSCG00000003546	-	6:82298534-82298936	402	1.57271	0.370965	5.33906	1.98504	0	0.0531148	0.489367	0.155813	0.42421	0.122976	0	0
ENSSSCT00000003940	ENSSSCG00000003547	NCMAP	6:82275776-82280957	267	0	0	0.183691	0.738817	0.380911	0.199111	0.382417	0	0.752786	0	0.171414	0
ENSSSCT00000003942	ENSSSCG00000003549	LDLRAP1	6:83030631-83054384	2847	1.11055	0.744641	1.6839	1.84348	2.89242	2.74946	2.0675	0.89896	1.47244	0.428861	0.54866	0.450606
ENSSSCT00000003945	ENSSSCG00000003551	PAQR7	6:83318410-83326834	2300	5.09906e-06	5.50566e-06	0.0980758	0.0482936	2.49448e-05	1.12552e-05	1.13338e-05	0.0410204	0.0556129	0.0412442	0.057339	0.0153812
ENSSSCT00000003946	ENSSSCG00000003552	AUNIP	6:83272800-83316418	1882	0.399472	0.293041	0.984563	0.81723	0.774242	1.08085	0.602511	0.797208	0.521785	0.156772	0.433717	0.299518
ENSSSCT00000003947	ENSSSCG00000003553	MTFR1L	6:83265388-83276957	2394	1.88743	1.40482	4.16393	5.69823	5.49901	7.3559	5.68118	3.40172	3.99043	1.34001	1.76177	1.36974
ENSSSCT00000003948	ENSSSCG00000003554	SELENON	6:83246933-83260993	1725	1.49557	1.04787	2.23633	1.62368	1.7338	2.47202	2.43523	0.872163	1.10548	0.643916	1.11389	1.28376
ENSSSCT00000003949	ENSSSCG00000003555	HMGN2	6:83858172-83861905	1299	2.38573	2.38913	7.84959	25.5877	17.9035	17.495	15.1322	5.63415	7.37404	1.19633	2.52918	3.20483
ENSSSCT00000003952	ENSSSCG00000003558	RPS6KA1	6:83905076-83947185	3007	0.0871268	5.11678e-12	3.47391e-05	3.45886e-05	3.0668e-06	0.325865	9.58239e-05	0.000351869	2.93321e-06	0.0373955	0.011265	1.06932e-05
ENSSSCT00000003953	ENSSSCG00000003559	ARID1A	6:84049394-84123349	6190	1.27675	0.758384	1.28046	0.59619	0.408523	0.548802	0.301191	0.737652	1.39354	0.366705	1.04099	1.21381
ENSSSCT00000003954	ENSSSCG00000040007	PIGV	6:84129963-84139247	2413	0.275604	0.222477	0.191007	0.186238	0.184904	0.197457	0.147063	0.25999	0.332616	0.045217	0.115736	0.0358726
ENSSSCT00000003955	ENSSSCG00000003561	ZDHHC18	6:84153716-84186885	4873	0.0112732	1.88585e-07	1.29051e-05	0.000192004	0.0236849	0.0606289	0.0412339	4.14103e-07	7.06929e-07	0.00565891	0.0345803	2.02134e-06
ENSSSCT00000003956	ENSSSCG00000003561	ZDHHC18	6:84153716-84189994	2810	0.352231	0.189248	0.457157	0.38294	0.347008	0.33281	0.210868	0.140007	0.305616	0.0957402	0.112158	0.0962704
ENSSSCT00000003958	ENSSSCG00000003564	GPATCH3	6:84200723-84218773	3963	0.215629	0.346443	0.705906	0.864394	1.14157	0.726067	0.685841	0.351198	0.701183	0.116719	0.121736	0.251634
ENSSSCT00000003959	ENSSSCG00000003565	NR0B2	6:84225237-84229681	3171	0.103503	0.0504891	0.219985	0.091778	0.159723	0.132309	0.0930824	0.136797	0.183761	0.0367131	0.0813062	0.0388053
ENSSSCT00000003960	ENSSSCG00000003566	NUDC	6:84238702-84252037	1239	5.41765	5.89801	18.4713	10.3759	10.5525	9.2629	8.63347	6.2452	6.68337	1.98865	3.42395	3.09149
ENSSSCT00000003961	ENSSSCG00000003567	KDF1	6:84254500-84265018	1801	0	0.010982	0	0	0.0105583	0	0	0	0	0	0	0.0108363
ENSSSCT00000003963	ENSSSCG00000003569	SLC9A1	6:84372647-84426976	4692	0.906878	0.64046	0.817827	0.457902	0.473671	0.598869	0.379836	0.224564	0.25727	0.178841	0.223212	0.33423
ENSSSCT00000003964	ENSSSCG00000003570	WDTC1	6:84449046-84534785	2571	2.12162	1.23841	2.93545	3.26629	2.98574	3.03122	2.06106	1.66414	2.10711	0.682547	1.56214	1.04529
ENSSSCT00000003966	ENSSSCG00000003572	SYTL1	6:84564246-84573203	1943	0	0	0.0396082	0.0193613	0.0383406	0.00984286	0	0.0402468	0.0387476	0	0.00997221	0.0598557
ENSSSCT00000003967	ENSSSCG00000003573	MAP3K6	6:84573328-84585392	5012	0.0279221	0.0509624	0.127026	0.0925029	0.122775	0.0513387	0.104225	0.110676	0.0388264	0.052011	0.10259	0.0898811
ENSSSCT00000003970	ENSSSCG00000003576	GPR3	6:84610106-84613202	2074	0.00933524	0	0.00921902	0	0.0271032	0.0183203	0	0	0	0	0.00928772	0
ENSSSCT00000003971	ENSSSCG00000003577	WASF2	6:84621745-84697426	5289	1.55247	0.976816	1.72332	1.8462	1.71328	1.79396	1.92467	0.711109	0.991106	0.343861	0.889108	0.516472
ENSSSCT00000003972	ENSSSCG00000003578	FGR	6:84810807-84823617	1928	0.0481213	0.130644	0.207003	0.305521	0.336949	0.411336	0.611236	0.160553	0.184825	0.0800782	9.06498e-33	0.225954
ENSSSCT00000003974	ENSSSCG00000003579	AHDC1	6:84735686-84757808	5548	1.83607e-05	2.86788e-05	0.112976	6.27765e-06	0.0592545	1.0357e-05	0.120679	0.0718733	3.85341e-06	0.0318526	0.189705	0.158087
ENSSSCT00000003975	ENSSSCG00000003580	EYA3	6:85095412-85185861	5889	0.728286	0.442532	1.43532	1.35814	1.31363	1.53419	0.742895	0.647826	0.839609	0.369858	0.334961	0.343667
ENSSSCT00000003977	ENSSSCG00000003582	SMPDL3B	6:85060325-85084480	2043	0.614369	0.343522	2.10887	1.02569	1.3172	2.58661	5.15237	4.14217	2.48448	0.594316	1.62656	1.48441
ENSSSCT00000003978	ENSSSCG00000003583	RPA2	6:85032553-85045930	1603	0.507646	0.424589	1.83891	2.08653	2.70678	3.73425	4.29743	2.36655	1.96856	0.399015	0.59188	0.800642
ENSSSCT00000003979	ENSSSCG00000003584	THEMIS2	6:85010745-85030723	5555	4.60443e-08	0.000242481	0.0205997	0.000541885	0.137948	0.162633	0.155849	0.0281632	0.0555155	0.0333872	0.0319068	0.142061
ENSSSCT00000003981	ENSSSCG00000003586	EPB41	6:85922218-85990258	2341	2.71837e-11	0.233297	0.447758	0.450376	0.437289	1.23256	1.60015	1.73743	2.31892	0.188704	0.306666	0.0339283
ENSSSCT00000003983	ENSSSCG00000003589	SRSF4	6:86064600-86092687	2582	0.000676021	0.159932	0.00011451	3.13109e-05	0.394973	0.276021	2.2629e-05	0.152034	2.72072e-05	2.11507e-05	0.000220918	0.000210638
ENSSSCT00000003984	ENSSSCG00000003589	SRSF4	6:86094394-86131664	6614	0.466495	0.233607	1.33179	0.965116	0.850492	0.923762	0.595838	0.635927	1.24866	0.153215	0.360115	0.317054
ENSSSCT00000003985	ENSSSCG00000003590	PTPRU	6:86137753-86228145	5578	0.138375	0.206162	0.148843	0.718062	0.224974	0.106554	0.201438	0.0527001	0.137252	0.0264685	0.0273364	0.0825803
ENSSSCT00000003986	ENSSSCG00000003591	PUM1	6:87547774-87687442	3583	0.665768	0.0155008	0.394098	0.554695	1.09721	0.452316	0.725673	0.000109637	0.00194478	5.25586e-06	0.139837	0.0870812
ENSSSCT00000003987	ENSSSCG00000003592	SDC3	6:87495042-87535845	5378	0.153137	0.0934331	0.335965	0.536227	0.473145	0.417926	0.702611	0.151748	0.178881	0.0480117	0.286783	0.36463
ENSSSCT00000003991	ENSSSCG00000003596	SNRNP40	6:87838891-87879623	2048	0.861204	0.677769	1.73854	1.86393	1.81374	1.98764	1.72831	0.9308	1.01477	0.419477	0.687368	0.800935
ENSSSCT00000003995	ENSSSCG00000003600	TINAGL1	6:88095634-88106088	1874	2.78451	1.16744	6.09316	14.4823	16.2104	8.16353	8.76887	5.45764	6.33505	0.936401	1.05326	1.95622
ENSSSCT00000003996	ENSSSCG00000003601	HCRTR1	6:88139622-88149531	1775	0.0110632	0.0223174	0	0	0.0107307	0	0.0111802	0	0	0	0	0
ENSSSCT00000003998	ENSSSCG00000003603	COL16A1	6:88177846-88239392	5095	0.303447	0.864855	2.18024	5.16718	4.19431	1.49314	2.02766	0.781474	1.08261	0.489964	0.632663	0.683858
ENSSSCT00000003999	ENSSSCG00000003604	ADGRB2	6:88256148-88286558	4955	0.0294315	0.0186555	0.0662688	1.39612e-06	0.0402655	0.0278886	0.103526	0.0171307	1.0544e-06	5.54242e-06	0.0266188	0.0529189
ENSSSCT00000004001	ENSSSCG00000003606	SPOCD1	6:88323285-88349266	3429	0	0	0	5.8635e-08	0	0	0	0	0	0	0	0
[truncated: 40,083 more rows]

## Sheet: B
Different expression between LT1D and LW1D libraries
Transcript_id	Gene_id	Gene	Locus	LT1D_value	LW1D_value	Log2(fold_change)	p_value	q_value	Significant
ENSSSCT00000000003	ENSSSCG00000000002	GTSE1	5:3227813-3270814	2.93931	0.682724	-2.1061	0.009	0.0480625	yes
ENSSSCT00000000007	ENSSSCG00000000006	PPARA	5:3302754-3321091	31.002	8.14659	-1.9281	5e-05	0.000654966	yes
ENSSSCT00000000035	ENSSSCG00000000033	TSPO	5:5723189-5735131	3.21293	11.8632	1.88453	5e-05	0.000654966	yes
ENSSSCT00000000039	ENSSSCG00000000037	ARFGAP3	5:5993807-6050539	4.24359	9.79447	1.20668	5e-05	0.000654966	yes
ENSSSCT00000000072	ENSSSCG00000000066	L3MBTL2	5:7253384-7277678	1.457	0.694667	-1.06861	5e-05	0.000654966	yes
ENSSSCT00000000114	ENSSSCG00000000108	TMEM184B	5:9632918-9682473	3.88828	0.834786	-2.21965	0.0048	0.0289459	yes
ENSSSCT00000000117	ENSSSCG00000000111	BAIAP2L2	5:9778726-9799703	1.49851	0.797317	-0.910299	0.0081	0.0441553	yes
ENSSSCT00000000125	ENSSSCG00000000119	EIF3L	5:9966121-9996260	34.3363	57.2318	0.737083	0.00465	0.0282053	yes
ENSSSCT00000000128	ENSSSCG00000029945	GCAT	5:10031224-10038476	1.19553	2.33656	0.966739	0.0061	0.0350266	yes
ENSSSCT00000000151	ENSSSCG00000000145	MYH9	5:11398165-11455054	17.5047	9.42796	-0.892727	0.0001	0.00122288	yes
ENSSSCT00000000184	ENSSSCG00000000175	ADCY6	5:14836797-14850728	7.1894	3.63829	-0.982612	5e-05	0.000654966	yes
ENSSSCT00000000204	ENSSSCG00000035856	-	5:15049829-15084043	6.27736	1.90325	-1.72169	5e-05	0.000654966	yes
ENSSSCT00000000253	ENSSSCG00000000234	GRASP	5:17358041-17367324	1.85938	1.01844	-0.868454	0.00365	0.0234354	yes
ENSSSCT00000000284	ENSSSCG00000000265	ESPL1	5:18487562-18509753	0.0781943	0.484931	2.63265	5e-05	0.000654966	yes
ENSSSCT00000000313	ENSSSCG00000000292	ZNF385A	5:19557336-19583315	1.97132	0.487175	-2.01665	0.00815	0.0443748	yes
ENSSSCT00000000314	ENSSSCG00000000293	ITGA5	5:19583450-19611209	7.40792	4.70648	-0.654419	0.0024	0.0167428	yes
ENSSSCT00000000319	ENSSSCG00000000298	PPP1R1A	5:19753856-19763269	66.9303	31.1888	-1.10163	5e-05	0.000654966	yes
ENSSSCT00000000402	ENSSSCG00000000376	SUOX	5:21395265-21399736	2.45109	5.35767	1.12818	5e-05	0.000654966	yes
ENSSSCT00000000465	ENSSSCG00000000431	MBD6	5:22793363-22798234	2.38558	0.737617	-1.6934	5e-05	0.000654966	yes
ENSSSCT00000000489	ENSSSCG00000000453	ATP23	5:23233853-23276036	1.80768	3.83785	1.08616	0.00225	0.01594	yes
ENSSSCT00000000491	ENSSSCG00000000455	LRIG3	5:24066622-24118043	1.2307	3.33772	1.43938	5e-05	0.000654966	yes
ENSSSCT00000000492	ENSSSCG00000000456	SLC16A7	5:24712655-24877213	1.5235	5.42566	1.83241	5e-05	0.000654966	yes
ENSSSCT00000000493	ENSSSCG00000000457	USP15	5:26964782-27083336	5.56605	12.8691	1.20918	5e-05	0.000654966	yes
ENSSSCT00000000500	ENSSSCG00000000462	RXYLT1	5:28247398-28276283	2.35106	7.62052	1.69658	5e-05	0.000654966	yes
ENSSSCT00000000511	ENSSSCG00000000473	-	5:30488064-30511550	4.94663	10.7191	1.11567	5e-05	0.000654966	yes
ENSSSCT00000000517	ENSSSCG00000028869	CAND1	5:31657500-31699839	3.36715	7.24718	1.10589	0.00195	0.0142894	yes
ENSSSCT00000000524	ENSSSCG00000000486	NUP107	5:32989780-33040561	2.70175	5.98539	1.14755	5e-05	0.000654966	yes
ENSSSCT00000000530	ENSSSCG00000000492	LYZ	5:33612592-33618953	0.086364	2.46097	4.83265	0.00355	0.0229418	yes
ENSSSCT00000000535	ENSSSCG00000000496	CCT2	5:33858638-33875661	32.3704	58.3659	0.850453	0.00025	0.00267452	yes
ENSSSCT00000000551	ENSSSCG00000000512	TBC1D15	5:35827439-35912593	0.805635	5.43398	2.75381	0.001	0.00829782	yes
ENSSSCT00000000563	ENSSSCG00000000521	PHLDA1	5:39314594-39315761	1.79054	0.559527	-1.67812	0.00045	0.0043236	yes
ENSSSCT00000000564	ENSSSCG00000000522	NAP1L1	5:39328036-39363731	6.48743	16.1627	1.31695	0.00505	0.0300877	yes
ENSSSCT00000000578	ENSSSCG00000000536	ERGIC2	5:44334179-44559352	2.8423	8.60021	1.59731	5e-05	0.000654966	yes
ENSSSCT00000000590	ENSSSCG00000000547	MRPS35	5:45973071-46023094	4.93443	11.3748	1.20488	5e-05	0.000654966	yes
ENSSSCT00000000592	ENSSSCG00000000549	PPFIBP1	5:46029675-46223524	5.47494	10.6076	0.954178	0.0091	0.048483	yes
ENSSSCT00000000595	ENSSSCG00000000552	MED21	5:46730209-46736376	10.7513	23.2637	1.11357	0.0001	0.00122288	yes
ENSSSCT00000000597	ENSSSCG00000000554	FGFR1OP2	5:46793136-46860545	1.64078	6.19718	1.91723	0.00355	0.0229418	yes
ENSSSCT00000000620	ENSSSCG00000000576	-	5:51810966-51831490	154.123	414.667	1.42787	5e-05	0.000654966	yes
ENSSSCT00000000627	ENSSSCG00000000583	PYROXD1	5:51921693-52131767	1.36404	4.0869	1.58312	0.00325	0.0213908	yes
ENSSSCT00000000647	ENSSSCG00000000602	RERG	5:57349381-57462804	1.16581	7.59569	2.70385	5e-05	0.000654966	yes
ENSSSCT00000000682	ENSSSCG00000000635	-	5:61425828-61433947	2.29699	6.86147	1.57877	0.00015	0.00172262	yes
ENSSSCT00000000703	ENSSSCG00000000649	CLEC1A	5:61849260-61870248	1.84927	4.93765	1.41687	0.0008	0.00694907	yes
ENSSSCT00000000764	ENSSSCG00000000702	ZNF384	5:64012802-64024560	2.74209	1.44561	-0.923595	0.0034	0.0221734	yes
ENSSSCT00000000780	ENSSSCG00000000717	KCNA6	5:65625584-65659219	0.648091	0.174671	-1.89156	5e-05	0.000654966	yes
ENSSSCT00000000799	ENSSSCG00000000736	TEAD4	5:67124725-67194381	2.87004	0.662948	-2.11411	5e-05	0.000654966	yes
ENSSSCT00000000807	ENSSSCG00000000743	FKBP4	5:67314010-67321630	124.791	44.4409	-1.48956	5e-05	0.000654966	yes
ENSSSCT00000000815	ENSSSCG00000000751	CCDC77	5:67725832-67756868	0.351389	0.883565	1.33027	0.0018	0.0134273	yes
ENSSSCT00000000828	ENSSSCG00000000764	HDHD5	5:69500284-69512611	4.38739	2.05312	-1.09555	0.0006	0.00548534	yes
ENSSSCT00000000849	ENSSSCG00000000784	LRRK2	5:71800336-71944105	4.41756	6.87638	0.638401	0.00385	0.0244104	yes
ENSSSCT00000000859	ENSSSCG00000000793	PPHLN1	5:73534696-73697374	3.03828	7.9996	1.39667	0.0003	0.0031131	yes
ENSSSCT00000000862	ENSSSCG00000000795	ADAMTS20	5:74502099-74672835	20.962	7.75195	-1.43515	5e-05	0.000654966	yes
ENSSSCT00000000865	ENSSSCG00000000798	TWF1	5:74868590-74893713	1.49568	8.76021	2.55017	5e-05	0.000654966	yes
ENSSSCT00000000866	ENSSSCG00000000799	IRAK4	5:74842183-74858125	1.01246	3.2919	1.70106	5e-05	0.000654966	yes
ENSSSCT00000000879	ENSSSCG00000000810	AMIGO2	5:77642194-77645753	0.770196	1.94503	1.33649	0.0001	0.00122288	yes
ENSSSCT00000000914	ENSSSCG00000000840	WASHC4	5:79417711-79474645	4.27701	10.8271	1.33998	5e-05	0.000654966	yes
ENSSSCT00000000915	ENSSSCG00000000841	APPL2	5:79356066-79412235	4.95333	14.4539	1.54499	5e-05	0.000654966	yes
ENSSSCT00000000923	ENSSSCG00000000846	HCFC2	5:80368243-80409786	4.54381	9.05913	0.995471	0.0009	0.00763745	yes
ENSSSCT00000000930	ENSSSCG00000000853	NT5DC3	5:80644244-80688504	12.5752	5.08093	-1.30742	5e-05	0.000654966	yes
ENSSSCT00000000936	ENSSSCG00000000857	IGF1	5:81776421-81848048	2.27162	6.86494	1.59553	0.00565	0.0329653	yes
ENSSSCT00000000951	ENSSSCG00000000871	SLC5A8	5:82973249-83030996	0.758139	0.260877	-1.53909	0.0005	0.00469914	yes
ENSSSCT00000000960	ENSSSCG00000000877	SCYL2	5:83812680-83894636	1.8285	8.82033	2.27017	5e-05	0.000654966	yes
ENSSSCT00000000963	ENSSSCG00000025682	ACTR6	5:83908882-83929081	3.39005	9.63239	1.50659	5e-05	0.000654966	yes
ENSSSCT00000000975	ENSSSCG00000000891	LTA4H	5:87486712-87518357	12.3836	33.2135	1.42334	5e-05	0.000654966	yes
ENSSSCT00000000980	ENSSSCG00000000896	NTN4	5:87671870-87784701	1.26763	2.43209	0.940066	0.0048	0.0289459	yes
ENSSSCT00000000984	ENSSSCG00000000900	VEZT	5:88035641-88226266	4.84998	12.346	1.34799	0.00155	0.0118729	yes
ENSSSCT00000000986	ENSSSCG00000000902	NR2C1	5:88231261-88277997	2.28732	5.46117	1.25555	5e-05	0.000654966	yes
ENSSSCT00000000989	ENSSSCG00000000905	-	5:88292770-88317177	89.4126	158.628	0.827096	0.00035	0.00351525	yes
ENSSSCT00000000992	ENSSSCG00000000908	-	5:89702681-89707784	12.47	23.3261	0.903486	0.0023	0.0162237	yes
ENSSSCT00000000994	ENSSSCG00000000910	CRADD	5:89306249-89587429	5.84055	12.9099	1.1443	0.0003	0.0031131	yes
ENSSSCT00000000999	ENSSSCG00000000915	DCN	5:91678607-91713925	160.414	323.191	1.01058	5e-05	0.000654966	yes
ENSSSCT00000001000	ENSSSCG00000000916	LUM	5:91748493-91760563	10.5409	23.9472	1.18386	5e-05	0.000654966	yes
ENSSSCT00000001004	ENSSSCG00000000920	POC1B	5:93132081-93222522	1.15438	2.34552	1.02279	0.00415	0.0259236	yes
ENSSSCT00000001010	ENSSSCG00000000925	C12orf29	5:94473175-94489661	1.96543	6.58231	1.74375	5e-05	0.000654966	yes
ENSSSCT00000001058	ENSSSCG00000000968	SBF1	5:260721-361548	10.2958	4.70049	-1.13117	0.0044	0.0270557	yes
ENSSSCT00000001062	ENSSSCG00000000972	TUBGCP6	5:445717-467415	3.19931	1.2804	-1.32117	0.00045	0.0043236	yes
ENSSSCT00000001063	ENSSSCG00000000973	SELENOO	5:467546-480836	9.97727	5.56938	-0.841128	0.00015	0.00172262	yes
ENSSSCT00000001071	ENSSSCG00000000981	CRELD2	5:707716-716917	2.24127	1.22569	-0.870724	0.00405	0.0254452	yes
ENSSSCT00000001087	ENSSSCG00000000997	PPP1R3G	7:2845808-3057806	26.9245	14.616	-0.88137	0.00035	0.00351525	yes
ENSSSCT00000001109	ENSSSCG00000026211	NRN1	7:3681830-3691969	0.123989	0.811985	2.71124	0.0011	0.00893588	yes
ENSSSCT00000001114	ENSSSCG00000001021	RREB1	7:4579102-4638176	6.45922	1.78188	-1.85796	5e-05	0.000654966	yes
ENSSSCT00000001125	ENSSSCG00000034986	-	7:20728661-20729072	0.59125	8.7572	3.88863	0.0005	0.00469914	yes
ENSSSCT00000001132	ENSSSCG00000001038	-	7:7462211-7469623	31.1277	54.4293	0.806182	0.0005	0.00469914	yes
ENSSSCT00000001158	ENSSSCG00000001063	-	7:12117239-12137926	5.67711	9.85832	0.796185	0.0005	0.00469914	yes
ENSSSCT00000001165	ENSSSCG00000001070	FAM8A1	7:13378151-13390890	11.2694	28.5851	1.34286	5e-05	0.000654966	yes
ENSSSCT00000001170	ENSSSCG00000001075	-	7:13820890-13934874	11.5437	65.6881	2.50852	5e-05	0.000654966	yes
ENSSSCT00000001173	ENSSSCG00000001078	MBOAT1	7:15532072-15643988	0.862091	1.69874	0.978551	0.00275	0.018732	yes
ENSSSCT00000001183	ENSSSCG00000001087	MRS2	7:19244410-19346420	1.36537	3.23145	1.24289	0.0025	0.0173186	yes
ENSSSCT00000001188	ENSSSCG00000001092	TDP2	7:19488919-19502546	3.48753	8.40257	1.26863	5e-05	0.000654966	yes
ENSSSCT00000001195	ENSSSCG00000001099	CMAH	7:19873778-19955840	0.224242	0.745412	1.73298	0.00055	0.0050956	yes
ENSSSCT00000001230	ENSSSCG00000031122	HIST1H2BB	7:20735560-20735941	8.92795	71.143	2.99432	5e-05	0.000654966	yes
ENSSSCT00000001263	ENSSSCG00000040923	HIST1H2BN	7:21276964-21652382	2.92322	28.2805	3.27418	0.00295	0.0198163	yes
ENSSSCT00000001295	ENSSSCG00000001197	ZNF165	7:21936039-21949794	0.140925	0.670116	2.24948	0.0006	0.00548534	yes
ENSSSCT00000001518	ENSSSCG00000001394	-	7:23596300-23609638	0.66982	2.90611	2.11724	0.0003	0.0031131	yes
ENSSSCT00000001540	ENSSSCG00000001409	PRRC2A	7:23742342-23755885	15.2105	5.69958	-1.41614	5e-05	0.000654966	yes
ENSSSCT00000001542	ENSSSCG00000001410	BAG6	7:23756983-23768515	10.2573	4.65034	-1.14124	0.0057	0.03313	yes
ENSSSCT00000001561	ENSSSCG00000001421	ZBTB12	7:23994529-23996980	1.33857	0.653182	-1.03513	0.00505	0.0300877	yes
ENSSSCT00000001570	ENSSSCG00000001427	C4A	7:24068069-24086128	0.8527	4.60167	2.43205	5e-05	0.000654966	yes
ENSSSCT00000001585	ENSSSCG00000001436	RNF5	7:24215489-24221082	10.6159	6.16646	-0.783718	0.0025	0.0173186	yes
ENSSSCT00000001593	ENSSSCG00000001440	NOTCH4	7:24231883-24256141	3.87137	2.45361	-0.657936	0.0034	0.0221734	yes
ENSSSCT00000001609	ENSSSCG00000001453	HLA-DRA	7:24825010-24830844	8.69191	31.3443	1.85046	5e-05	0.000654966	yes
ENSSSCT00000001616	ENSSSCG00000001456	-	7:24939675-25037892	5.24002	12.0066	1.19619	0.0038	0.0241605	yes
ENSSSCT00000001617	ENSSSCG00000001457	SLA-DQB1	7:24939675-25037892	6.79167	14.3372	1.07792	0.00155	0.0118729	yes
ENSSSCT00000001630	ENSSSCG00000025618	TAP1	7:25045173-25077233	2.64767	6.95954	1.39427	0.00025	0.00267452	yes
ENSSSCT00000001633	ENSSSCG00000001469	SLA-DMB	7:25119277-25125106	2.44818	6.58679	1.42787	5e-05	0.000654966	yes
ENSSSCT00000001669	ENSSSCG00000001497	ZNF451	7:28680548-28765600	0.775171	2.01344	1.37708	0.0033	0.0216387	yes
ENSSSCT00000001714	ENSSSCG00000001539	PPARD	7:31222486-31297939	4.2216	0.863114	-2.29017	0.00035	0.00351525	yes
ENSSSCT00000001722	ENSSSCG00000001544	TEAD3	7:31337889-31351452	5.40753	1.97168	-1.45554	5e-05	0.000654966	yes
ENSSSCT00000001728	ENSSSCG00000001550	ARMC12	7:31592084-31601773	2.7137	0.24653	-3.46043	5e-05	0.000654966	yes
ENSSSCT00000001744	ENSSSCG00000001565	CDKN1A	7:32359454-32362271	61.5362	36.2579	-0.763139	0.001	0.00829782	yes
ENSSSCT00000001750	ENSSSCG00000001571	-	7:32617425-32635580	32.2138	14.8937	-1.11298	5e-05	0.000654966	yes
ENSSSCT00000001752	ENSSSCG00000001573	PIM1	7:32788004-32793881	7.03257	2.26223	-1.6363	5e-05	0.000654966	yes
ENSSSCT00000001775	ENSSSCG00000001595	DAAM2	7:35159048-35283324	3.92727	2.15819	-0.863702	0.0001	0.00122288	yes
ENSSSCT00000001812	ENSSSCG00000001629	USP49	7:36984363-36994759	0.758898	0.3439	-1.14192	0.00745	0.0412725	yes
ENSSSCT00000001852	ENSSSCG00000001661	SRF	7:38213062-38223384	18.7895	8.67424	-1.11512	5e-05	0.000654966	yes
ENSSSCT00000001892	ENSSSCG00000001695	VEGFA	7:38746054-38762342	35.8975	17.0432	-1.07468	5e-05	0.000654966	yes
ENSSSCT00000001908	ENSSSCG00000001708	CDC5L	7:39384391-39430143	7.28983	17.6507	1.27577	5e-05	0.000654966	yes
ENSSSCT00000001920	ENSSSCG00000001718	CYP39A1	7:41344803-41457884	1.15304	3.54611	1.6208	0.0015	0.0115715	yes
ENSSSCT00000001937	ENSSSCG00000001732	MUT	7:43597150-43642509	2.85194	7.60094	1.41423	0.0044	0.0270557	yes
ENSSSCT00000001983	ENSSSCG00000001770	CTSH	7:48083571-48106074	4.47661	8.63556	0.947884	0.00015	0.00172262	yes
ENSSSCT00000001995	ENSSSCG00000001780	FAH	7:49047982-49087783	1.22563	2.63104	1.10211	0.0005	0.00469914	yes
ENSSSCT00000002017	ENSSSCG00000001801	BTBD1	7:51877454-51926239	43.3438	148.345	1.77506	5e-05	0.000654966	yes
ENSSSCT00000002022	ENSSSCG00000001806	FSD2	7:52144505-52194133	22.486	14.4346	-0.639497	0.0043	0.0265985	yes
ENSSSCT00000002033	ENSSSCG00000001814	IQGAP1	7:52958095-53130721	6.55796	15.9118	1.27878	5e-05	0.000654966	yes
ENSSSCT00000002035	ENSSSCG00000001816	BLM	7:53317539-53416519	0.343753	0.844018	1.2959	0.00175	0.0131403	yes
ENSSSCT00000002063	ENSSSCG00000001841	RHCG	7:55046244-55072218	1.10439	1.91225	0.79203	0.00785	0.0430806	yes
ENSSSCT00000002087	ENSSSCG00000001862	ETFA	7:56311521-56541132	64.6847	146.644	1.18082	0.0001	0.00122288	yes
ENSSSCT00000002091	ENSSSCG00000001866	RCN2	7:57041032-57058747	5.10905	18.8603	1.88422	5e-05	0.000654966	yes
ENSSSCT00000002092	ENSSSCG00000001867	PSTPIP1	7:57102756-57146751	1.40333	0.337059	-2.05778	5e-05	0.000654966	yes
ENSSSCT00000002098	ENSSSCG00000001873	CSPG4	7:57949454-57988335	6.44034	3.71405	-0.794145	0.00025	0.00267452	yes
ENSSSCT00000002110	ENSSSCG00000001885	C15orf39	7:58379691-58390100	2.10944	0.766931	-1.45969	5e-05	0.000654966	yes
ENSSSCT00000002153	ENSSSCG00000001924	BBS4	7:60631913-60693747	1.68888	3.86998	1.19626	0.00145	0.011285	yes
ENSSSCT00000002166	ENSSSCG00000001934	-	7:61113783-61193266	6.92483	11.6571	0.751357	0.0021	0.0151024	yes
ENSSSCT00000002178	ENSSSCG00000001946	MBIP	7:63658443-63684529	2.08948	4.89159	1.22716	0.002	0.0145715	yes
ENSSSCT00000002179	ENSSSCG00000001947	BRMS1L	7:64083288-64123857	2.19736	5.35896	1.28619	5e-05	0.000654966	yes
ENSSSCT00000002183	ENSSSCG00000001951	PSMA6	7:64575558-64603258	19.9975	34.0884	0.769463	0.0007	0.00622013	yes
ENSSSCT00000002187	ENSSSCG00000001955	SRP54	7:64829227-64905741	5.56555	10.6387	0.934725	0.00015	0.00172262	yes
ENSSSCT00000002190	ENSSSCG00000001958	BAZ1A	7:64970329-65088147	2.01659	4.24384	1.07345	0.00225	0.01594	yes
ENSSSCT00000002193	ENSSSCG00000001960	EAPP	7:65240203-65263272	4.18855	13.2372	1.66008	5e-05	0.000654966	yes
ENSSSCT00000002204	ENSSSCG00000001971	HECTD1	7:68318416-68422394	37.6304	60.4998	0.685031	0.0044	0.0270557	yes
ENSSSCT00000002206	ENSSSCG00000001973	SCFD1	7:68693364-68851008	3.15795	7.93129	1.32857	5e-05	0.000654966	yes
ENSSSCT00000002207	ENSSSCG00000001974	G2E3	7:68852776-68917062	1.09904	5.54779	2.33567	5e-05	0.000654966	yes
ENSSSCT00000002240	ENSSSCG00000002002	IRF9	7:75118743-75139630	2.02702	6.95228	1.77813	5e-05	0.000654966	yes
ENSSSCT00000002265	ENSSSCG00000002025	SLC22A17	7:75734874-75741128	4.85909	2.20994	-1.13668	0.0001	0.00122288	yes
ENSSSCT00000002293	ENSSSCG00000002050	DAD1	7:76431963-76457890	17.3862	28.0646	0.690804	0.00335	0.0219162	yes
ENSSSCT00000002396	ENSSSCG00000002142	TEP1	7:78491052-78530146	5.74956	3.49472	-0.718277	0.0014	0.0109594	yes
ENSSSCT00000002397	ENSSSCG00000002143	PARP2	7:78531708-78551424	1.29104	2.87922	1.15714	5e-05	0.000654966	yes
ENSSSCT00000002500	ENSSSCG00000002245	KATNBL1	7:80287645-80350165	3.36981	8.25689	1.29293	5e-05	0.000654966	yes
ENSSSCT00000002515	ENSSSCG00000002258	KLHL25	7:88262923-88264691	1.31833	0.596243	-1.14474	0.00355	0.0229418	yes
ENSSSCT00000002525	ENSSSCG00000002267	RGMA	7:85921587-85968882	9.46236	6.01627	-0.653332	0.00355	0.0229418	yes
ENSSSCT00000002527	ENSSSCG00000002269	MTHFD1	7:88471373-88537389	3.16898	5.03649	0.6684	0.0032	0.0211226	yes
ENSSSCT00000002535	ENSSSCG00000002277	SPTB	7:88764470-88954851	61.6519	18.3539	-1.74806	5e-05	0.000654966	yes
ENSSSCT00000002537	ENSSSCG00000002279	GPX2	7:89007369-89011620	5.66678	1.63732	-1.79119	5e-05	0.000654966	yes
ENSSSCT00000002542	ENSSSCG00000002283	FUT8	7:89395633-89692888	1.86884	5.12318	1.45489	5e-05	0.000654966	yes
ENSSSCT00000002553	ENSSSCG00000002292	PLEKHH1	7:91257324-91304996	1.19456	0.349898	-1.77147	5e-05	0.000654966	yes
ENSSSCT00000002556	ENSSSCG00000002295	VTI1B	7:91343987-91413884	7.06583	4.17087	-0.760512	0.00885	0.0474279	yes
ENSSSCT00000002557	ENSSSCG00000002296	RDH11	7:91414947-91452535	1.45616	3.15646	1.11614	0.00015	0.00172262	yes
ENSSSCT00000002559	ENSSSCG00000002298	ZFYVE26	7:91520571-91590449	2.80971	1.41895	-0.985593	5e-05	0.000654966	yes
ENSSSCT00000002568	ENSSSCG00000002306	GALNT16	7:92929068-93041441	5.60839	2.98623	-0.909264	5e-05	0.000654966	yes
ENSSSCT00000002603	ENSSSCG00000002340	PSEN1	7:96478189-96568182	6.16852	11.0235	0.837585	5e-05	0.000654966	yes
ENSSSCT00000002614	ENSSSCG00000002350	ELMSAN1	7:97055797-97077034	9.43933	3.30982	-1.51193	5e-05	0.000654966	yes
ENSSSCT00000002615	ENSSSCG00000002351	-	7:97174175-97258459	33.6334	99.3477	1.56259	0.00015	0.00172262	yes
ENSSSCT00000002621	ENSSSCG00000002357	ALDH6A1	7:97360539-97381889	4.58433	11.802	1.36425	5e-05	0.000654966	yes
ENSSSCT00000002630	ENSSSCG00000002366	NPC2	7:97730515-97743911	12.4954	21.3128	0.770329	0.00115	0.00925312	yes
ENSSSCT00000002660	ENSSSCG00000002392	IRF2BPL	7:100120138-100122489	8.89757	4.23932	-1.06958	0.00425	0.0263678	yes
ENSSSCT00000002675	ENSSSCG00000002406	AHSA1	7:100510225-100522161	15.5929	5.59633	-1.47833	5e-05	0.000654966	yes
ENSSSCT00000002680	ENSSSCG00000002411	GTF2A1	7:103963244-104009302	4.33869	9.29727	1.09955	5e-05	0.000654966	yes
ENSSSCT00000002693	ENSSSCG00000002424	SPATA7	7:110309461-110364033	0.89435	1.84962	1.04832	0.00675	0.0380975	yes
ENSSSCT00000002694	ENSSSCG00000002425	PTPN21	7:110377095-110449557	8.0109	4.70139	-0.768876	0.00055	0.0050956	yes
ENSSSCT00000002701	ENSSSCG00000002431	TDP1	7:111767428-111854907	0.261249	0.559164	1.09785	0.00615	0.0352782	yes
ENSSSCT00000002710	ENSSSCG00000002440	-	7:112918534-112992186	3.34489	1.18768	-1.49381	5e-05	0.000654966	yes
ENSSSCT00000002713	ENSSSCG00000002443	TC2N	7:113337824-113392337	0.166725	0.982139	2.55846	0.00055	0.0050956	yes
ENSSSCT00000002714	ENSSSCG00000002444	FBLN5	7:113423631-113512182	5.63357	11.2202	0.993973	0.0074	0.0410354	yes
ENSSSCT00000002716	ENSSSCG00000002446	ATXN3	7:113608780-113645844	3.1846	8.58912	1.4314	5e-05	0.000654966	yes
ENSSSCT00000002719	ENSSSCG00000002449	-	7:113652773-113691241	183.935	390.317	1.08545	0.0004	0.00392923	yes
ENSSSCT00000002729	ENSSSCG00000002458	TMEM251	7:114574138-114575889	2.27035	4.95845	1.12698	0.001	0.00829782	yes
ENSSSCT00000002739	ENSSSCG00000002467	ASB2	7:115208700-115259733	13.8081	2.79523	-2.30448	0.00145	0.011285	yes
ENSSSCT00000002742	ENSSSCG00000002470	DDX24	7:115328118-115348745	6.08146	9.46021	0.637455	0.00565	0.0329653	yes
ENSSSCT00000002743	ENSSSCG00000035297	ISG12(A)	7:115356202-115365452	6.63012	83.926	3.66201	5e-05	0.000654966	yes
ENSSSCT00000002772	ENSSSCG00000002494	CLMN	7:116476788-116590181	1.02117	0.292476	-1.80384	5e-05	0.000654966	yes
ENSSSCT00000002793	ENSSSCG00000002515	SLC25A47	7:121192449-121210374	0.982144	0.231115	-2.08733	0.00065	0.00586491	yes
ENSSSCT00000002805	ENSSSCG00000002526	RCOR1	AEMK02000452.1:1330769-1469632	3.81947	2.36183	-0.693465	0.00245	0.0170239	yes
ENSSSCT00000002815	ENSSSCG00000002535	HSP90AA1	AEMK02000452.1:916988-1098921	225.107	62.6233	-1.84584	5e-05	0.000654966	yes
ENSSSCT00000002839	ENSSSCG00000002554	PLD4	AEMK02000452.1:3137040-3144117	0.178714	0.881	2.30149	0.00045	0.0043236	yes
ENSSSCT00000002840	ENSSSCG00000002555	JAG2	AEMK02000452.1:3262094-3276823	3.08896	0.786516	-1.97357	0.0038	0.0241605	yes
ENSSSCT00000002842	ENSSSCG00000002557	NUDT14	AEMK02000452.1:3289305-3296905	10.4771	22.4084	1.0968	5e-05	0.000654966	yes
ENSSSCT00000002858	ENSSSCG00000002573	-	7:121707340-121711414	16.4541	2.46948	-2.73617	5e-05	0.000654966	yes
ENSSSCT00000002907	ENSSSCG00000002620	EFHC1	7:46244921-46320258	0.369447	0.962011	1.38069	0.0052	0.0307965	yes
ENSSSCT00000002909	ENSSSCG00000002622	TMEM14A	7:46509771-46517732	0.571135	1.96391	1.78183	0.0093	0.0493069	yes
ENSSSCT00000002917	ENSSSCG00000002629	FBXO9	7:46723397-46748126	10.6942	20.72	0.95419	5e-05	0.000654966	yes
ENSSSCT00000002938	ENSSSCG00000002648	CBFA2T3	6:830825-852821	7.29689	1.94361	-1.90854	5e-05	0.000654966	yes
ENSSSCT00000002941	ENSSSCG00000002650	APRT	6:890902-893277	7.44969	3.70696	-1.00695	0.0012	0.00960463	yes
ENSSSCT00000002943	ENSSSCG00000002652	KLHDC4	6:1627029-1677130	4.21427	2.27039	-0.892346	0.00015	0.00172262	yes
ENSSSCT00000002946	ENSSSCG00000002655	MAP1LC3B	6:1849978-1941079	10.6098	22.4334	1.08025	0.0026	0.0178757	yes
ENSSSCT00000002961	ENSSSCG00000002670	USP10	6:3977230-4043533	8.62408	4.77738	-0.85215	5e-05	0.000654966	yes
ENSSSCT00000002973	ENSSSCG00000002680	TAF1C	6:4451209-4457089	3.67751	2.07054	-0.828723	0.00195	0.0142894	yes
ENSSSCT00000002991	ENSSSCG00000002697	NUDT7	6:10161959-10173980	7.0229	15.8129	1.17096	5e-05	0.000654966	yes
ENSSSCT00000003001	ENSSSCG00000002707	GABARAPL2	6:12122056-12132991	29.2268	81.875	1.48613	5e-05	0.000654966	yes
ENSSSCT00000003009	ENSSSCG00000002715	RFWD3	6:12952240-12994052	0.744923	1.64066	1.13911	0.00015	0.00172262	yes
ENSSSCT00000003017	ENSSSCG00000002723	-	6:13298697-13317903	42.6103	13.6434	-1.64299	5e-05	0.000654966	yes
ENSSSCT00000003034	ENSSSCG00000002738	ZNF23	6:14463300-14473545	0.861753	1.73127	1.00648	0.00815	0.0443748	yes
ENSSSCT00000003049	ENSSSCG00000002752	ZFHX3	6:15698297-16023169	3.497	0.900573	-1.9572	5e-05	0.000654966	yes
ENSSSCT00000003069	ENSSSCG00000002771	EDC4	6:28489421-28501527	9.50969	5.86762	-0.696623	0.00185	0.0137018	yes
ENSSSCT00000003081	ENSSSCG00000002783	SLC9A5	6:27884658-27903090	0.623588	0.270424	-1.20537	0.0056	0.0327406	yes
ENSSSCT00000003102	ENSSSCG00000002802	GINS3	6:20162536-20171485	0.205169	0.946584	2.20592	5e-05	0.000654966	yes
ENSSSCT00000003105	ENSSSCG00000002805	CFAP20	6:19948917-19969347	1.82186	4.02732	1.14441	0.0002	0.00220367	yes
ENSSSCT00000003106	ENSSSCG00000002806	MMP15	6:19890883-19918244	7.45451	4.82101	-0.628777	0.0069	0.0388002	yes
ENSSSCT00000003129	ENSSSCG00000002828	LPCAT2	6:29997764-30056713	0.636157	2.08085	1.70972	5e-05	0.000654966	yes
ENSSSCT00000003139	ENSSSCG00000002838	ZNF423	6:34929215-35302540	4.04697	2.13273	-0.924142	0.0024	0.0167428	yes
ENSSSCT00000003153	ENSSSCG00000002852	PLEKHF1	6:39786955-39797573	19.2997	12.3313	-0.646253	0.0038	0.0241605	yes
ENSSSCT00000003155	ENSSSCG00000002854	POP4	6:39734517-39748257	3.18915	0.760847	-2.06749	0.0006	0.00548534	yes
ENSSSCT00000003158	ENSSSCG00000002857	-	6:42608306-42706762	0.522022	1.68517	1.69071	0.00025	0.00267452	yes
ENSSSCT00000003167	ENSSSCG00000002866	CEBPA	6:43084645-43085710	0.792464	1.75994	1.15111	0.0089	0.0476623	yes
ENSSSCT00000003170	ENSSSCG00000002869	LSM14A	6:43847731-43907127	15.0893	35.5122	1.23479	5e-05	0.000654966	yes
ENSSSCT00000003224	ENSSSCG00000002919	TYROBP	6:45309200-45312539	2.46319	6.42075	1.38221	0.00035	0.00351525	yes
ENSSSCT00000003228	ENSSSCG00000002923	WDR62	6:45418860-45473977	0.64658	0.357382	-0.855363	0.0087	0.0468552	yes
ENSSSCT00000003242	ENSSSCG00000029170	ZNF566	6:45894253-45927769	0.657566	1.81882	1.4678	0.00035	0.00351525	yes
ENSSSCT00000003245	ENSSSCG00000002932	ZNF567	6:45709661-45737832	0.626	2.43922	1.96219	5e-05	0.000654966	yes
ENSSSCT00000003257	ENSSSCG00000029420	ZNF569	6:46377295-46425611	1.55541	4.27212	1.45765	5e-05	0.000654966	yes
ENSSSCT00000003320	ENSSSCG00000002989	AKT2	6:48555841-48606167	16.6862	6.85558	-1.2833	0.00945	0.049905	yes
ENSSSCT00000003349	ENSSSCG00000003016	CCDC97	6:49318628-49328876	1.51184	0.404321	-1.90274	0.00345	0.0224545	yes
ENSSSCT00000003355	ENSSSCG00000003021	MEGF8	6:49542874-49618688	8.37763	3.40067	-1.30072	0.00335	0.0219162	yes
ENSSSCT00000003361	ENSSSCG00000003030	CIC	6:49630831-49660975	3.00928	1.18536	-1.34409	0.0003	0.0031131	yes
ENSSSCT00000003371	ENSSSCG00000003035	-	6:49689637-49708523	8.43162	3.88873	-1.11651	0.00085	0.00728631	yes
ENSSSCT00000003373	ENSSSCG00000003037	ZNF574	6:49834903-49837595	3.40457	1.61905	-1.07233	0.0002	0.00220367	yes
ENSSSCT00000003379	ENSSSCG00000003042	RPS19	6:50001040-50010060	100.114	182.093	0.863024	0.00425	0.0263678	yes
ENSSSCT00000003409	ENSSSCG00000003072	ZNF283	6:50650504-50678027	2.70219	5.55286	1.0391	5e-05	0.000654966	yes
ENSSSCT00000003437	ENSSSCG00000003098	PPP5C	6:52377978-52402047	11.211	7.35855	-0.607423	0.0057	0.03313	yes
ENSSSCT00000003440	ENSSSCG00000003101	HIF3A	6:52345101-52373058	10.3349	2.87035	-1.84822	5e-05	0.000654966	yes
ENSSSCT00000003446	ENSSSCG00000003107	ARHGAP35	6:52704366-52841807	12.5163	4.92289	-1.34623	5e-05	0.000654966	yes
ENSSSCT00000003449	ENSSSCG00000003110	ZC3H4	6:52897810-52936960	3.03709	1.00877	-1.5901	5e-05	0.000654966	yes
ENSSSCT00000003475	ENSSSCG00000003134	GRWD1	6:53849667-53859187	4.02788	2.62965	-0.615153	0.00905	0.048273	yes
ENSSSCT00000003482	ENSSSCG00000003140	FGF21	6:54082605-54084606	2.6476	0.177279	-3.90059	0.0009	0.00763745	yes
ENSSSCT00000003486	ENSSSCG00000003143	MAMSTR	6:54052714-54057880	10.5866	5.07834	-1.05981	0.00015	0.00172262	yes
ENSSSCT00000003489	ENSSSCG00000003145	FUT2	6:54034334-54044730	1.0065	0.205666	-2.29097	0.00015	0.00172262	yes
ENSSSCT00000003494	ENSSSCG00000003148	DBP	6:53986957-54024826	2.31365	0.71056	-1.70314	0.0081	0.0441553	yes
ENSSSCT00000003506	ENSSSCG00000003156	HRC	6:54337487-54377555	53.6934	28.3422	-0.921792	0.0002	0.00220367	yes
ENSSSCT00000003535	ENSSSCG00000003183	RRAS	6:54680596-54684719	31.1539	19.4232	-0.681632	0.0022	0.0156489	yes
ENSSSCT00000003554	ENSSSCG00000003199	AP2A1	6:54786698-54829923	19.4162	9.94168	-0.965699	0.0003	0.0031131	yes
ENSSSCT00000003556	ENSSSCG00000003201	ATF5	6:54881587-54951544	30.7445	1.32687	-4.53423	0.0004	0.00392923	yes
ENSSSCT00000003588	ENSSSCG00000003229	ETFB	6:58501810-58517647	82.8949	53.0853	-0.64297	0.0033	0.0216387	yes
ENSSSCT00000003598	ENSSSCG00000003239	HAS1	6:58307113-58313486	1.46293	0.204479	-2.83884	5e-05	0.000654966	yes
ENSSSCT00000003613	ENSSSCG00000003253	-	6:56236315-56278582	15.0371	9.17239	-0.713154	0.0024	0.0167428	yes
ENSSSCT00000003652	ENSSSCG00000003288	HSPBP1	6:59452685-59464705	2.74893	1.06691	-1.36544	0.0024	0.0167428	yes
ENSSSCT00000003665	ENSSSCG00000003301	PPP6R1	6:59427900-59440973	8.49976	5.23613	-0.698921	0.0017	0.0128197	yes
ENSSSCT00000003666	ENSSSCG00000003302	TMEM86B	6:59424133-59426774	1.31646	0.302163	-2.12326	0.00425	0.0263678	yes
ENSSSCT00000003721	ENSSSCG00000003352	-	6:63805003-63819902	5.22257	1.90767	-1.45295	5e-05	0.000654966	yes
ENSSSCT00000003745	ENSSSCG00000003376	PLEKHG5	6:67316818-67365701	1.01702	0.226766	-2.16507	0.00035	0.00351525	yes
ENSSSCT00000003750	ENSSSCG00000003379	KLHL21	6:67397366-67434812	21.253	7.73465	-1.45826	5e-05	0.000654966	yes
ENSSSCT00000003764	ENSSSCG00000003393	TMEM201	6:69973396-69998544	8.5378	2.81076	-1.60291	5e-05	0.000654966	yes
ENSSSCT00000003769	ENSSSCG00000003398	UBE4B	6:70345800-70462430	5.59539	2.40932	-1.21561	0.00015	0.00172262	yes
ENSSSCT00000003771	ENSSSCG00000003399	RBP7	6:70313308-70326455	1.86768	5.1581	1.46559	0.00125	0.00995593	yes
ENSSSCT00000003786	ENSSSCG00000003413	MTOR	6:71285102-71448662	8.30567	5.16494	-0.685344	0.0057	0.03313	yes
ENSSSCT00000003807	ENSSSCG00000003429	CLCN6	6:71881924-71916023	1.46004	0.488908	-1.57838	5e-05	0.000654966	yes
ENSSSCT00000003811	ENSSSCG00000003433	PLOD1	6:71987932-72019707	22.5447	9.26079	-1.28358	5e-05	0.000654966	yes
ENSSSCT00000003817	ENSSSCG00000003439	DHRS3	6:72556233-72599238	8.05168	3.44688	-1.224	5e-05	0.000654966	yes
ENSSSCT00000003830	ENSSSCG00000003449	LRRC38	6:72935777-72960988	8.0729	2.4431	-1.72438	5e-05	0.000654966	yes
ENSSSCT00000003841	ENSSSCG00000003458	EFHD2	6:74651796-74668434	6.59621	4.27777	-0.624779	0.00785	0.0430806	yes
ENSSSCT00000003846	ENSSSCG00000003460	CASP9	6:74691652-74730046	0.661279	1.22368	0.887897	0.0085	0.0459298	yes
ENSSSCT00000003857	ENSSSCG00000003471	EPHA2	6:75249934-75280107	4.49674	1.11073	-2.01737	5e-05	0.000654966	yes
ENSSSCT00000003874	ENSSSCG00000003488	UBR4	6:77568726-77707930	21.514	8.54613	-1.33193	5e-05	0.000654966	yes
ENSSSCT00000003880	ENSSSCG00000003493	CAPZB	6:77780681-77913339	14.7848	7.2323	-1.03159	0.0013	0.0102717	yes
ENSSSCT00000003912	ENSSSCG00000003521	-	6:80112276-80139670	2.41416	0.481979	-2.32448	0.00195	0.0142894	yes
ENSSSCT00000003915	ENSSSCG00000003524	C1QA	6:80586182-80591269	6.22008	20.8032	1.7418	5e-05	0.000654966	yes
ENSSSCT00000003948	ENSSSCG00000003554	SELENON	6:83246933-83260993	4.43086	2.12631	-1.05923	0.00015	0.00172262	yes
ENSSSCT00000003956	ENSSSCG00000003561	ZDHHC18	6:84153716-84189994	1.01305	0.342758	-1.56345	0.00215	0.0153651	yes
ENSSSCT00000003960	ENSSSCG00000003566	NUDC	6:84237736-84265018	17.5018	8.08813	-1.11362	5e-05	0.000654966	yes
ENSSSCT00000003963	ENSSSCG00000003569	SLC9A1	6:84372647-84426976	2.89351	0.719198	-2.00836	5e-05	0.000654966	yes
ENSSSCT00000003971	ENSSSCG00000003577	WASF2	6:84610106-84697426	4.57002	2.1644	-1.07824	0.00145	0.011285	yes
ENSSSCT00000003978	ENSSSCG00000003583	RPA2	6:85032553-85045930	3.2754	5.85433	0.837833	0.004	0.0251865	yes
ENSSSCT00000003995	ENSSSCG00000003600	TINAGL1	6:88095634-88106088	10.4866	17.8953	0.771025	0.00155	0.0118729	yes
ENSSSCT00000004007	ENSSSCG00000003612	EIF3I	6:88693053-88712853	41.0497	26.7761	-0.616425	0.0081	0.0441553	yes
ENSSSCT00000004011	ENSSSCG00000003616	FAM167B	6:88715793-88717269	3.23889	9.10654	1.4914	5e-05	0.000654966	yes
ENSSSCT00000004017	ENSSSCG00000003621	ZSCAN20	6:89732663-89754719	4.99942	1.98409	-1.33329	5e-05	0.000654966	yes
ENSSSCT00000004024	ENSSSCG00000003628	CLSPN	6:91903713-91941692	0.45779	1.5939	1.79981	5e-05	0.000654966	yes
ENSSSCT00000004033	ENSSSCG00000003637	MAP7D1	6:92298779-92322693	9.1022	2.18772	-2.05679	0.0004	0.00392923	yes
ENSSSCT00000004038	ENSSSCG00000003642	INPP5B	6:93885458-93944384	7.55144	3.35045	-1.1724	5e-05	0.000654966	yes
ENSSSCT00000004041	ENSSSCG00000003645	UTP11	6:93993702-94007039	20.3357	31.566	0.634358	0.0044	0.0270557	yes
ENSSSCT00000004049	ENSSSCG00000003653	NDUFS5	6:94912684-94919457	115.079	187.791	0.706504	0.00115	0.00925312	yes
ENSSSCT00000004093	ENSSSCG00000003694	EMILIN2	6:103730620-103786896	8.04345	14.5709	0.857203	0.0004	0.00392923	yes
ENSSSCT00000004098	ENSSSCG00000003699	GREB1L	6:106566594-106691127	1.43077	0.817185	-0.808059	0.0023	0.0162237	yes
ENSSSCT00000004111	ENSSSCG00000003712	OSBPL1A	6:108997735-109218508	4.3477	7.7792	0.83937	0.0001	0.00122288	yes
ENSSSCT00000004118	ENSSSCG00000003718	TAF4B	6:110855586-110972790	0.747759	2.52956	1.75824	0.0001	0.00122288	yes
ENSSSCT00000004149	ENSSSCG00000003747	-	6:120794840-121036285	1.43347	3.51515	1.29408	0.0004	0.00392923	yes
ENSSSCT00000004165	ENSSSCG00000003763	IFI44	6:134100933-134680050	1.26637	12.8057	3.33802	5e-05	0.000654966	yes
ENSSSCT00000004175	ENSSSCG00000003773	AK5	6:135745878-136020581	0.512797	1.46852	1.5179	0.0001	0.00122288	yes
ENSSSCT00000004179	ENSSSCG00000003776	ACADM	6:137541380-137595108	33.0126	111.318	1.7536	0.00185	0.0137018	yes
ENSSSCT00000004183	ENSSSCG00000003780	CRYZ	6:138415155-138461045	9.06601	17.0409	0.91046	0.00105	0.00862179	yes
ENSSSCT00000004186	ENSSSCG00000003783	FPGT	6:138940485-139145033	1.19697	3.72063	1.63616	5e-05	0.000654966	yes
ENSSSCT00000004190	ENSSSCG00000003787	ZRANB2	6:141927467-141947765	10.5833	36.846	1.79972	5e-05	0.000654966	yes
ENSSSCT00000004193	ENSSSCG00000003789	CTH	6:142454913-142486386	0.97198	2.02917	1.06189	0.0071	0.0397095	yes
ENSSSCT00000004194	ENSSSCG00000003790	ANKRD13C	6:142516119-142618400	1.77975	5.2383	1.55742	0.0002	0.00220367	yes
ENSSSCT00000004195	ENSSSCG00000003791	SRSF11	6:142623109-142651683	8.15668	22.7763	1.48148	5e-05	0.000654966	yes
ENSSSCT00000004196	ENSSSCG00000003792	-	6:142668091-142715692	0.81764	2.95189	1.8521	5e-05	0.000654966	yes
ENSSSCT00000004203	ENSSSCG00000003798	SERBP1	6:145186714-145203417	51.8874	89.6008	0.788128	0.00065	0.00586491	yes
ENSSSCT00000004212	ENSSSCG00000003806	LEPROT	6:146974638-146987306	10.1423	24.4954	1.27212	5e-05	0.000654966	yes
ENSSSCT00000004221	ENSSSCG00000003814	EFCAB7	6:148939052-148996669	0.419772	2.60769	2.63509	0.00275	0.018732	yes
ENSSSCT00000004223	ENSSSCG00000003816	ATG4C	6:149608219-149691946	1.53253	5.37985	1.81165	5e-05	0.000654966	yes
ENSSSCT00000004261	ENSSSCG00000003849	-	6:158988582-158998984	5.52784	15.0734	1.44722	5e-05	0.000654966	yes
ENSSSCT00000004269	ENSSSCG00000003857	ZYG11B	6:159407925-159480648	36.3088	68.9747	0.925746	0.0001	0.00122288	yes
ENSSSCT00000004288	ENSSSCG00000003876	CDKN2C	6:161160289-161166686	1.71529	3.288	0.938753	0.00175	0.0131403	yes
ENSSSCT00000004297	ENSSSCG00000003885	-	6:164160915-164197327	4.58278	13.2997	1.53709	5e-05	0.000654966	yes
ENSSSCT00000004328	ENSSSCG00000003913	MAST2	6:165406931-165458086	8.58635	3.22207	-1.41406	5e-05	0.000654966	yes
ENSSSCT00000004344	ENSSSCG00000003928	PLK3	6:166527349-166533576	1.00476	0.404719	-1.31185	0.0021	0.0151024	yes
ENSSSCT00000004346	ENSSSCG00000003930	-	6:166549948-166553274	490.098	784.663	0.679004	0.007	0.0392272	yes
ENSSSCT00000004359	ENSSSCG00000003941	SZT2	6:167809003-167868633	2.3517	0.796292	-1.56233	0.0015	0.0115715	yes
ENSSSCT00000004397	ENSSSCG00000003975	KCNQ4	6:170348103-170401519	14.3205	4.24048	-1.75578	5e-05	0.000654966	yes
ENSSSCT00000004445	ENSSSCG00000004020	SFT2D1	1:2568526-2593516	8.05548	13.6902	0.765097	0.00455	0.0277462	yes
ENSSSCT00000004467	ENSSSCG00000004039	SLC22A3	1:7061968-7207402	1.49622	0.654637	-1.19256	0.0003	0.0031131	yes
ENSSSCT00000004472	ENSSSCG00000004044	IGF2R	1:7368102-7472548	16.3848	8.92343	-0.876689	0.00015	0.00172262	yes
ENSSSCT00000004487	ENSSSCG00000004058	EZR	1:8403354-8452747	7.02421	13.1398	0.903535	5e-05	0.000654966	yes
ENSSSCT00000004492	ENSSSCG00000004063	TMEM242	1:9667884-9719230	5.69757	12.889	1.17772	5e-05	0.000654966	yes
ENSSSCT00000004500	ENSSSCG00000004071	-	1:12297376-12395687	4.80752	2.00903	-1.25879	5e-05	0.000654966	yes
ENSSSCT00000004505	ENSSSCG00000004076	MTRF1L	1:13446491-13458290	2.16289	3.84322	0.829354	0.0084	0.0454972	yes
ENSSSCT00000004519	ENSSSCG00000004088	ARMT1	1:14776606-14851848	2.12096	5.3985	1.34784	0.00045	0.0043236	yes
ENSSSCT00000004526	ENSSSCG00000004094	PPP1R14C	1:15867839-15949956	1.87715	3.29626	0.81229	0.0073	0.040629	yes
ENSSSCT00000004539	ENSSSCG00000004104	KATNA1	1:16330846-16360800	5.87426	10.997	0.904628	0.0004	0.00392923	yes
ENSSSCT00000004556	ENSSSCG00000004121	FBXO30	1:19755719-20024398	3.53553	12.709	1.84585	0.0083	0.0450625	yes
ENSSSCT00000004565	ENSSSCG00000004130	-	1:21414545-21430218	3.71052	6.34641	0.774322	0.00265	0.0181756	yes
ENSSSCT00000004577	ENSSSCG00000004142	CITED2	1:25155663-25162193	3.04671	10.2883	1.75568	0.0001	0.00122288	yes
ENSSSCT00000004584	ENSSSCG00000004148	CCDC28A	1:25645194-25663547	1.75699	4.86108	1.46817	5e-05	0.000654966	yes
ENSSSCT00000004587	ENSSSCG00000004150	-	1:26002627-26011454	0.468383	1.78789	1.9325	5e-05	0.000654966	yes
ENSSSCT00000004605	ENSSSCG00000004166	AHI1	1:28566396-28762381	1.96692	4.08411	1.05409	0.001	0.00829782	yes
ENSSSCT00000004608	ENSSSCG00000004169	HBS1L	1:28968843-29055581	6.94372	17.29	1.31616	0.00015	0.00172262	yes
ENSSSCT00000004629	ENSSSCG00000004190	STX7	1:31184924-31237640	5.56461	16.4665	1.56518	5e-05	0.000654966	yes
ENSSSCT00000004631	ENSSSCG00000004192	CTGF	1:31673797-31680169	3.06271	7.8548	1.35877	0.00685	0.0385665	yes
ENSSSCT00000004637	ENSSSCG00000004196	MED23	1:31960023-32001581	1.72927	5.07326	1.55275	0.0005	0.00469914	yes
ENSSSCT00000004642	ENSSSCG00000004201	TMEM200A	1:32963627-32965103	2.6866	0.435058	-2.6265	5e-05	0.000654966	yes
ENSSSCT00000004661	ENSSSCG00000004218	RSPO3	1:35984949-36066958	1.1898	2.23123	0.907118	0.0055	0.0322468	yes
ENSSSCT00000004667	ENSSSCG00000004222	NCOA7	1:37043804-37194446	0.773796	4.07278	2.39599	0.0001	0.00122288	yes
ENSSSCT00000004681	ENSSSCG00000004236	PKIB	1:39913722-40022976	2.40694	10.0226	2.05798	5e-05	0.000654966	yes
ENSSSCT00000004682	ENSSSCG00000004237	SERINC1	1:40099185-40141544	25.8788	86.4928	1.74081	5e-05	0.000654966	yes
ENSSSCT00000004683	ENSSSCG00000004238	HSF2	1:40147163-40180297	4.01533	11.318	1.49503	5e-05	0.000654966	yes
ENSSSCT00000004691	ENSSSCG00000004244	MAN1A1	1:42729721-42896291	1.16194	3.05594	1.39508	0.0017	0.0128197	yes
ENSSSCT00000004696	ENSSSCG00000004249	CEP85L	1:43392974-43559423	17.5465	39.6607	1.17652	5e-05	0.000654966	yes
ENSSSCT00000004711	ENSSSCG00000004262	KPNA5	1:44899218-44962730	1.08232	5.83911	2.43162	5e-05	0.000654966	yes
ENSSSCT00000004744	ENSSSCG00000004290	TBX18	1:53835908-53867055	0.87271	3.70568	2.08616	5e-05	0.000654966	yes
ENSSSCT00000004747	ENSSSCG00000004293	SNX14	1:54460814-54549309	5.28094	16.7931	1.669	5e-05	0.000654966	yes
ENSSSCT00000004754	ENSSSCG00000004300	SMIM8	1:55727278-55788281	7.55969	13.9875	0.88774	0.00035	0.00351525	yes
ENSSSCT00000004759	ENSSSCG00000004304	SLC35A1	1:55859613-56070187	3.1388	10.4259	1.73189	0.0046	0.0279689	yes
ENSSSCT00000004769	ENSSSCG00000004314	PM20D2	1:57188534-57216285	16.6193	26.7802	0.688307	0.0019	0.0139904	yes
ENSSSCT00000004774	ENSSSCG00000004318	RRAGD	1:57374054-57645955	7.00143	21.0406	1.58745	0.0082	0.0445832	yes
ENSSSCT00000004780	ENSSSCG00000004324	LYRM2	1:57651683-57654886	5.75924	16.9587	1.55807	5e-05	0.000654966	yes
ENSSSCT00000004795	ENSSSCG00000004339	UFL1	1:63638524-63700975	3.05148	13.3731	2.13175	5e-05	0.000654966	yes
ENSSSCT00000004796	ENSSSCG00000004340	FHL5	1:63705935-63755534	4.83695	8.15046	0.752782	0.0008	0.00694907	yes
ENSSSCT00000004798	ENSSSCG00000004342	NDUFAF4	1:64021524-64062137	2.63115	5.18593	0.97891	0.0035	0.0227022	yes
ENSSSCT00000004808	ENSSSCG00000004351	USP45	1:66390522-66454771	1.52001	5.89367	1.95508	5e-05	0.000654966	yes
ENSSSCT00000004812	ENSSSCG00000004355	-	1:66579142-66580441	0.820807	0.117743	-2.80141	0.00345	0.0224545	yes
ENSSSCT00000004814	ENSSSCG00000004357	SIM1	1:67217959-67294756	2.9528	6.14046	1.05626	0.00025	0.00267452	yes
ENSSSCT00000004823	ENSSSCG00000004364	HACE1	1:70994035-71105046	1.0934	3.72013	1.76653	5e-05	0.000654966	yes
ENSSSCT00000004826	ENSSSCG00000004366	BVES	1:71314237-71360301	13.0344	7.79898	-0.740963	0.0012	0.00960463	yes
ENSSSCT00000004840	ENSSSCG00000004379	SOBP	1:73549182-73702017	1.8221	0.798837	-1.18963	0.00025	0.00267452	yes
ENSSSCT00000004845	ENSSSCG00000004383	OSTM1	1:74139329-74181165	2.23582	6.68896	1.58098	5e-05	0.000654966	yes
ENSSSCT00000004853	ENSSSCG00000004390	SESN1	1:74923830-75170379	27.1769	98.8046	1.86219	0.0002	0.00220367	yes
ENSSSCT00000004855	ENSSSCG00000004392	AMD1	1:76839730-76863722	12.1471	18.7272	0.624525	0.005	0.0298522	yes
ENSSSCT00000004856	ENSSSCG00000004393	GTF3C6	1:76896822-76909858	2.55786	5.54289	1.1157	0.00015	0.00172262	yes
ENSSSCT00000004866	ENSSSCG00000004403	CDC40	1:76107529-76367756	2.52465	8.9345	1.8233	5e-05	0.000654966	yes
ENSSSCT00000004877	ENSSSCG00000004414	-	1:75272049-75462332	17.8936	31.8953	0.833897	0.0018	0.0134273	yes
ENSSSCT00000004888	ENSSSCG00000004423	TUBE1	1:78005359-78048438	0.322376	1.69598	2.3953	0.0001	0.00122288	yes
ENSSSCT00000004897	ENSSSCG00000004432	HDAC2	1:79866669-79901587	7.00471	18.7766	1.42254	5e-05	0.000654966	yes
ENSSSCT00000004911	ENSSSCG00000004446	-	1:82161697-82182177	8.78268	19.1504	1.12464	5e-05	0.000654966	yes
ENSSSCT00000004931	ENSSSCG00000004464	TENT5A	1:84545027-84552134	5.90025	13.224	1.16431	5e-05	0.000654966	yes
ENSSSCT00000004932	ENSSSCG00000004465	BCKDHB	1:85755742-86017666	4.17467	9.20673	1.14103	5e-05	0.000654966	yes
ENSSSCT00000004933	ENSSSCG00000004466	TTK	1:86076582-86125748	0.0862058	1.89096	4.45519	0.00035	0.00351525	yes
ENSSSCT00000004940	ENSSSCG00000004472	IRAK1BP1	1:87290825-87329926	0.235897	1.26515	2.42308	5e-05	0.000654966	yes
ENSSSCT00000004941	ENSSSCG00000004473	PHIP	1:87117223-87242674	6.19664	10.9147	0.816713	0.0002	0.00220367	yes
ENSSSCT00000004955	ENSSSCG00000004484	COL12A1	1:90744288-90872963	50.3324	24.9241	-1.01395	0.00035	0.00351525	yes
ENSSSCT00000004961	ENSSSCG00000004490	SETBP1	1:94314555-94663029	10.1738	4.41352	-1.20486	5e-05	0.000654966	yes
ENSSSCT00000004968	ENSSSCG00000004497	PSTPIP2	1:95625800-95727801	4.20104	14.5932	1.79648	5e-05	0.000654966	yes
ENSSSCT00000004969	ENSSSCG00000004498	HAUS1	1:95756219-95774245	1.79554	5.12418	1.5129	0.00465	0.0282053	yes
ENSSSCT00000004978	ENSSSCG00000004506	CTIF	1:98133311-98455708	4.76906	1.86338	-1.35579	0.0034	0.0221734	yes
ENSSSCT00000005002	ENSSSCG00000004528	MBD2	1:103683064-103752267	2.35452	4.34463	0.883796	0.0002	0.00220367	yes
ENSSSCT00000005008	ENSSSCG00000004534	CCDC68	1:104420667-104474696	0.148011	1.3198	3.15655	5e-05	0.000654966	yes
ENSSSCT00000005018	ENSSSCG00000004543	MTFMT	1:106970634-107001118	4.51292	13.3627	1.56608	5e-05	0.000654966	yes
ENSSSCT00000005027	ENSSSCG00000004551	ZNF609	1:107340541-107583313	2.88232	1.44899	-0.992187	0.0011	0.00893588	yes
ENSSSCT00000005028	ENSSSCG00000004552	TRIP4	1:107585986-107655214	2.31975	4.76927	1.0398	0.00715	0.03995	yes
ENSSSCT00000005031	ENSSSCG00000004554	PCLAF	1:107659434-107669476	0.179425	5.38991	4.90881	5e-05	0.000654966	yes
ENSSSCT00000005048	ENSSSCG00000004569	LACTB	1:108909701-108924511	3.92608	8.90272	1.18116	5e-05	0.000654966	yes
ENSSSCT00000005057	ENSSSCG00000004578	ANXA2	1:111588305-111635100	20.9272	49.7123	1.24822	5e-05	0.000654966	yes
ENSSSCT00000005061	ENSSSCG00000004582	BNIP2	1:112344059-112369245	4.70297	11.1158	1.24097	5e-05	0.000654966	yes
ENSSSCT00000005062	ENSSSCG00000004583	-	1:112371318-112400238	5.03745	13.2077	1.39061	5e-05	0.000654966	yes
ENSSSCT00000005069	ENSSSCG00000004588	CCNB2	1:112907048-112942219	0.15119	2.88589	4.25458	5e-05	0.000654966	yes
ENSSSCT00000005076	ENSSSCG00000004595	ADAM10	1:113289083-113412543	1.94155	8.13094	2.06621	5e-05	0.000654966	yes
ENSSSCT00000005078	ENSSSCG00000004597	AQP9	1:113794039-114037046	0.101325	0.856837	3.08004	0.00525	0.0310362	yes
ENSSSCT00000005082	ENSSSCG00000004601	MNS1	1:115471921-115607894	0.119975	0.934454	2.96138	0.0053	0.0312428	yes
ENSSSCT00000005083	ENSSSCG00000004602	TEX9	1:115471921-115607894	2.78677	6.78415	1.28358	0.00025	0.00267452	yes
ENSSSCT00000005091	ENSSSCG00000004610	CCPG1	1:116449097-116532934	2.86436	14.6863	2.35819	0.00045	0.0043236	yes
ENSSSCT00000005107	ENSSSCG00000004624	-	1:119725028-119771400	10.4648	24.7321	1.24084	5e-05	0.000654966	yes
ENSSSCT00000005121	ENSSSCG00000004636	TRPM7	1:121145856-121250211	4.36312	13.9802	1.67996	5e-05	0.000654966	yes
ENSSSCT00000005130	ENSSSCG00000004645	GABPB1	1:121412981-121488366	0.418087	1.75895	2.07284	0.0073	0.040629	yes
ENSSSCT00000005136	ENSSSCG00000004651	GALK2	1:122119694-122526981	0.50758	1.87772	1.88727	0.0077	0.0424514	yes
ENSSSCT00000005137	ENSSSCG00000004652	COPS2	1:122542408-122575007	8.68129	40.8951	2.23595	5e-05	0.000654966	yes
ENSSSCT00000005138	ENSSSCG00000004653	SECISBP2L	1:122633907-122689098	7.38699	13.8066	0.902301	0.0053	0.0312428	yes
ENSSSCT00000005158	ENSSSCG00000004672	GATM	1:126361879-126382617	0.932442	1.84554	0.984955	0.0004	0.00392923	yes
ENSSSCT00000005176	ENSSSCG00000004687	B2M	1:126834579-126872431	6.91491	19.303	1.48104	0.0001	0.00122288	yes
ENSSSCT00000005213	ENSSSCG00000022039	STARD9	1:128657566-128808959	1.4005	0.60687	-1.20648	0.0011	0.00893588	yes
ENSSSCT00000005219	ENSSSCG00000004726	LRRC57	1:128816904-128847168	3.0118	8.16939	1.4396	5e-05	0.000654966	yes
ENSSSCT00000005226	ENSSSCG00000004730	TMEM87A	1:129098418-129142150	6.64019	16.2956	1.29519	5e-05	0.000654966	yes
ENSSSCT00000005244	ENSSSCG00000004745	RPAP1	1:129838331-129866834	4.91579	2.4902	-0.981163	0.0012	0.00960463	yes
ENSSSCT00000005250	ENSSSCG00000004751	CHP1	1:130073547-130112751	5.1643	1.19248	-2.1146	0.00255	0.0176062	yes
ENSSSCT00000005265	ENSSSCG00000004766	-	1:130592418-130640284	0.174427	0.65457	1.90793	0.00145	0.011285	yes
ENSSSCT00000005273	ENSSSCG00000004774	IVD	1:130894149-130910609	8.98705	14.68	0.707935	0.0011	0.00893588	yes
ENSSSCT00000005274	ENSSSCG00000004775	KNSTRN	1:130916135-130951948	0.466625	2.59919	2.47773	5e-05	0.000654966	yes
ENSSSCT00000005291	ENSSSCG00000004792	FAM98B	1:132789893-132819825	1.69647	3.01339	0.828851	0.0078	0.0428474	yes
ENSSSCT00000005298	ENSSSCG00000004799	ZNF770	1:136121110-136236356	2.68252	8.34668	1.63761	0.00095	0.00797867	yes
ENSSSCT00000005302	ENSSSCG00000004803	ACTC1	1:136281118-136286631	340.178	637.761	0.906725	0.0008	0.00694907	yes
ENSSSCT00000005305	ENSSSCG00000004806	-	1:136497447-136522347	0.14066	1.3826	3.2971	5e-05	0.000654966	yes
ENSSSCT00000005311	ENSSSCG00000030560	-	1:137387824-137692307	12.6821	5.60311	-1.17849	5e-05	0.000654966	yes
ENSSSCT00000005322	ENSSSCG00000004820	LINS1	1:139168782-139191174	1.95156	5.95065	1.60842	5e-05	0.000654966	yes
ENSSSCT00000005323	ENSSSCG00000004821	-	1:139191406-139240198	1.15664	2.63714	1.18904	5e-05	0.000654966	yes
ENSSSCT00000005325	ENSSSCG00000004823	LRRK1	1:139494120-139624607	0.713513	1.22183	0.776033	0.0043	0.0265985	yes
ENSSSCT00000005331	ENSSSCG00000004829	CACHD1	6:147775072-148010299	4.75821	2.92452	-0.70222	0.0013	0.0102717	yes
ENSSSCT00000005346	ENSSSCG00000004844	MTMR10	1:143867040-143918339	3.86924	5.90744	0.610482	0.00655	0.0371064	yes
ENSSSCT00000005367	ENSSSCG00000004861	TSHZ1	1:148905625-148985823	2.87921	1.47781	-0.962216	5e-05	0.000654966	yes
ENSSSCT00000005381	ENSSSCG00000004875	CYB5A	1:149737536-149783623	5.30816	10.995	1.05057	5e-05	0.000654966	yes
ENSSSCT00000005390	ENSSSCG00000004884	TMX3	1:153988014-154032757	4.18193	9.88969	1.24176	5e-05	0.000654966	yes
ENSSSCT00000005394	ENSSSCG00000004888	SERPINB8	1:157820647-157836836	0.494806	1.62005	1.7111	5e-05	0.000654966	yes
ENSSSCT00000005449	ENSSSCG00000004938	DENND4A	1:163659935-163790227	1.82055	5.31509	1.54572	0.00555	0.0324899	yes
ENSSSCT00000005460	ENSSSCG00000004948	SMAD6	1:164657085-164734703	2.72977	1.21071	-1.17292	0.0008	0.00694907	yes
ENSSSCT00000005464	ENSSSCG00000004952	SMAD3	1:164992194-165192944	20.851	7.91249	-1.39791	5e-05	0.000654966	yes
ENSSSCT00000005466	ENSSSCG00000004954	C15orf61	1:165436813-165441736	6.76351	12.9514	0.937261	0.00275	0.018732	yes
ENSSSCT00000005482	ENSSSCG00000004970	-	1:167296074-167300229	618.605	1007.26	0.703351	0.00945	0.049905	yes
ENSSSCT00000005484	ENSSSCG00000004971	TLE3	1:167808508-167855819	3.18906	1.83031	-0.801046	0.0012	0.00960463	yes
ENSSSCT00000005485	ENSSSCG00000004973	UACA	1:168353120-168453172	1.44133	6.59501	2.19398	0.0009	0.00763745	yes
ENSSSCT00000005488	ENSSSCG00000004976	LRRC49	1:168553360-168700361	0.128453	0.872681	2.76422	0.0001	0.00122288	yes
ENSSSCT00000005493	ENSSSCG00000004980	THSD4	1:168751484-169323953	3.0068	0.96529	-1.63919	5e-05	0.000654966	yes
ENSSSCT00000005500	ENSSSCG00000004986	TRAPPC6B	1:169710953-169722758	3.90245	10.2341	1.39093	5e-05	0.000654966	yes
ENSSSCT00000005502	ENSSSCG00000004983	-	1:169777106-169868351	2.48736	9.82614	1.98201	5e-05	0.000654966	yes
ENSSSCT00000005503	ENSSSCG00000004989	FBXO33	1:169877191-169915911	2.57668	4.68586	0.862799	0.00065	0.00586491	yes
ENSSSCT00000005509	ENSSSCG00000030679	C14orf28	1:175145912-175156595	0.835415	2.20685	1.40143	0.0002	0.00220367	yes
ENSSSCT00000005522	ENSSSCG00000005006	RPL36AL	1:179476637-179479801	12.3644	22.1053	0.838195	0.00165	0.0125088	yes
ENSSSCT00000005554	ENSSSCG00000005038	PSMC6	1:182265011-182407784	12.5051	32.9424	1.39743	0.0007	0.00622013	yes
ENSSSCT00000005556	ENSSSCG00000005040	-	1:182409854-182423476	1.46839	4.68692	1.67441	0.0002	0.00220367	yes
ENSSSCT00000005569	ENSSSCG00000005052	WDHD1	1:184300292-184378959	0.751859	1.67198	1.15303	0.0003	0.0031131	yes
ENSSSCT00000005572	ENSSSCG00000005055	LGALS3	1:184478642-184496155	4.37754	8.92486	1.02771	0.0018	0.0134273	yes
ENSSSCT00000005573	ENSSSCG00000005056	DLGAP5	1:184496743-184550091	0.092945	1.85582	4.31954	5e-05	0.000654966	yes
ENSSSCT00000005579	ENSSSCG00000005062	TMEM260	1:185821241-185886556	0.846314	2.98618	1.81903	0.00075	0.00659255	yes
ENSSSCT00000005583	ENSSSCG00000005066	EXOC5	1:186377518-186430107	4.82343	11.0023	1.18967	0.0002	0.00220367	yes
ENSSSCT00000005589	ENSSSCG00000005072	PSMA3	1:187343130-187372193	12.589	23.1342	0.877862	0.00015	0.00172262	yes
ENSSSCT00000005590	ENSSSCG00000005073	ARID4A	1:187385394-187452537	1.43228	4.19676	1.55096	5e-05	0.000654966	yes
ENSSSCT00000005606	ENSSSCG00000005086	SIX6	1:189497806-189503500	2.0919	1.24401	-0.749814	0.0082	0.0445832	yes
ENSSSCT00000005610	ENSSSCG00000005090	MNAT1	1:189690343-189910589	3.71207	9.63379	1.37588	5e-05	0.000654966	yes
ENSSSCT00000005612	ENSSSCG00000005092	SLC38A6	1:189923322-189988576	1.13915	3.36014	1.56056	0.00095	0.00797867	yes
ENSSSCT00000005647	ENSSSCG00000005122	TEK	1:195937430-196052751	1.69202	7.73854	2.19332	5e-05	0.000654966	yes
ENSSSCT00000005663	ENSSSCG00000005135	-	1:200882955-200934112	1.9232	7.94697	2.0469	5e-05	0.000654966	yes
ENSSSCT00000005678	ENSSSCG00000005150	KLHL9	1:201589415-201591302	9.74511	16.7603	0.782299	0.00115	0.00925312	yes
ENSSSCT00000005703	ENSSSCG00000005173	HAUS6	1:203720255-203771228	2.19644	4.99631	1.18569	5e-05	0.000654966	yes
ENSSSCT00000005735	ENSSSCG00000005203	IL33	1:215899419-215941873	1.74441	6.64754	1.93008	0.00295	0.0198163	yes
ENSSSCT00000005736	ENSSSCG00000005204	RANBP6	1:216107593-216112386	3.80865	6.66367	0.807038	0.00025	0.00267452	yes
ENSSSCT00000005745	ENSSSCG00000005212	PLGRKT	1:216692046-216739728	14.6198	27.3416	0.903173	0.00065	0.00586491	yes
ENSSSCT00000005750	ENSSSCG00000005217	RCL1	1:217142879-217205324	4.37697	6.92751	0.662404	0.00555	0.0324899	yes
ENSSSCT00000005752	ENSSSCG00000005219	CDC37L1	1:217237373-217288006	5.43482	18.714	1.78381	5e-05	0.000654966	yes
ENSSSCT00000005761	ENSSSCG00000005227	PUM3	1:218994150-219038510	1.33692	4.70791	1.81618	0.0002	0.00220367	yes
ENSSSCT00000005802	ENSSSCG00000005267	ANXA1	1:226413515-226431961	5.93116	23.6107	1.99305	5e-05	0.000654966	yes
ENSSSCT00000005806	ENSSSCG00000005271	CARNMT1	1:228054914-228092335	7.83318	16.7196	1.09387	5e-05	0.000654966	yes
ENSSSCT00000005812	ENSSSCG00000005277	GCNT1	1:229429054-229467776	0.75183	1.98097	1.39773	0.00015	0.00172262	yes
ENSSSCT00000005817	ENSSSCG00000005282	-	1:230125762-230329846	5.97697	15.4402	1.36921	5e-05	0.000654966	yes
ENSSSCT00000005824	ENSSSCG00000005287	PSAT1	1:231146344-231171361	9.7148	2.95353	-1.71774	5e-05	0.000654966	yes
ENSSSCT00000005846	ENSSSCG00000005308	RUSC2	1:236265930-236324981	11.1248	3.93208	-1.50042	5e-05	0.000654966	yes
ENSSSCT00000005848	ENSSSCG00000005310	TESK1	1:236341178-236355713	11.1382	6.22722	-0.838851	0.00035	0.00351525	yes
ENSSSCT00000005877	ENSSSCG00000005338	RECK	1:236821389-236898276	2.11647	4.51924	1.09442	0.0005	0.00469914	yes
ENSSSCT00000005883	ENSSSCG00000005344	MELK	1:237316397-237440387	0.147704	1.2233	3.04999	0.00015	0.00172262	yes
ENSSSCT00000005886	ENSSSCG00000005347	POLR1E	1:238197665-238220520	4.64311	8.20876	0.822072	0.00055	0.0050956	yes
ENSSSCT00000005888	ENSSSCG00000005349	GRHPR	1:238139728-238151681	31.7337	17.0101	-0.899625	5e-05	0.000654966	yes
ENSSSCT00000005898	ENSSSCG00000005358	-	1:238680809-238826387	2.21888	1.34285	-0.724536	0.0089	0.0476623	yes
ENSSSCT00000005901	ENSSSCG00000005361	ALDH1B1	1:239109808-239114730	0.301332	0.863018	1.51804	0.0004	0.00392923	yes
ENSSSCT00000005904	ENSSSCG00000005364	TDRD7	1:239281647-239368567	2.28298	4.20513	0.881228	0.0005	0.00469914	yes
ENSSSCT00000005918	ENSSSCG00000005378	ANKS6	1:240527610-240584918	0.935647	0.278698	-1.74726	0.00035	0.00351525	yes
ENSSSCT00000005942	ENSSSCG00000005399	RNF20	1:243225718-243254557	2.44821	4.39469	0.844031	0.00045	0.0043236	yes
ENSSSCT00000005946	ENSSSCG00000005403	SMC2	1:245409590-245475909	0.573469	5.30954	3.2108	5e-05	0.000654966	yes
ENSSSCT00000005967	ENSSSCG00000005424	NIPSNAP3B	1:246104809-246140406	27.3412	46.1781	0.756132	0.0088	0.0471932	yes
ENSSSCT00000005970	ENSSSCG00000005427	FKTN	1:246853196-246916647	1.27728	2.58294	1.01594	0.00305	0.0203206	yes
ENSSSCT00000005987	ENSSSCG00000005444	TMEM245	1:250005448-250181859	1.61358	6.11571	1.92225	0.00905	0.048273	yes
ENSSSCT00000006000	ENSSSCG00000005455	SVEP1	1:251370188-251571076	4.54465	7.4852	0.719872	0.0007	0.00622013	yes
ENSSSCT00000006005	ENSSSCG00000005460	DNAJC25	1:252372014-252452971	2.29026	5.09771	1.15434	0.007	0.0392272	yes
ENSSSCT00000006018	ENSSSCG00000005472	SLC46A2	1:253556918-253569950	0.546168	0.21574	-1.34005	0.009	0.0480625	yes
ENSSSCT00000006030	ENSSSCG00000005484	ZNF618	1:254601881-254672964	1.13283	0.199943	-2.50227	5e-05	0.000654966	yes
ENSSSCT00000006045	ENSSSCG00000005498	PAPPA	1:256545162-256780763	1.53724	0.675923	-1.18541	5e-05	0.000654966	yes
ENSSSCT00000006051	ENSSSCG00000005503	TLR4	1:258044434-258055522	0.510058	1.17857	1.2083	0.00055	0.0050956	yes
ENSSSCT00000006075	ENSSSCG00000005524	DAB2IP	1:261754202-261857024	5.22369	2.23706	-1.22347	5e-05	0.000654966	yes
ENSSSCT00000006158	ENSSSCG00000005600	PPP6C	1:265870330-265929061	10.9647	21.3916	0.96417	5e-05	0.000654966	yes
ENSSSCT00000006159	ENSSSCG00000005601	HSPA5	1:265930041-265947997	14.3175	3.18301	-2.16932	0.003	0.0200636	yes
ENSSSCT00000006162	ENSSSCG00000005604	PBX3	1:266382570-266612865	0.560679	1.24323	1.14884	0.0046	0.0279689	yes
ENSSSCT00000006167	ENSSSCG00000005608	ANGPTL2	1:267480767-267770444	27.7008	15.374	-0.849437	0.0002	0.00220367	yes
ENSSSCT00000006185	ENSSSCG00000005625	ENG	1:268287728-268343936	4.32532	2.29081	-0.916949	0.00115	0.00925312	yes
ENSSSCT00000006187	ENSSSCG00000005627	AK1	1:268355034-268365598	68.0964	148.014	1.12008	0.0003	0.0031131	yes
ENSSSCT00000006192	ENSSSCG00000005631	FAM102A	1:268408128-268465802	2.9168	0.876301	-1.73489	5e-05	0.000654966	yes
ENSSSCT00000006195	ENSSSCG00000022655	PTGES2	1:268581834-268590836	6.02682	3.92375	-0.619162	0.00445	0.0272969	yes
ENSSSCT00000006210	ENSSSCG00000005648	SLC27A4	1:268773860-268788207	4.68962	2.44041	-0.942344	0.00025	0.00267452	yes
ENSSSCT00000006212	ENSSSCG00000005650	CERCAM	1:268838054-268847233	2.50747	1.48954	-0.751371	0.00925	0.0491331	yes
ENSSSCT00000006215	ENSSSCG00000005652	GLE1	1:268894275-268922750	2.03888	3.55827	0.803401	0.001	0.00829782	yes
ENSSSCT00000006219	ENSSSCG00000005656	-	1:269056716-269064634	29.1016	59.425	1.02997	5e-05	0.000654966	yes
ENSSSCT00000006232	ENSSSCG00000005669	MIGA2	1:269338124-269362328	12.4969	5.01591	-1.31699	5e-05	0.000654966	yes
ENSSSCT00000006243	ENSSSCG00000005678	NTMT1	1:269825956-269828163	21.1593	11.5444	-0.874103	0.00075	0.00659255	yes
ENSSSCT00000006244	ENSSSCG00000005679	ASB6	1:269828285-269834278	5.39819	2.64535	-1.02902	5e-05	0.000654966	yes
ENSSSCT00000006274	ENSSSCG00000005705	QRFP	1:270911877-270912282	4.14359	0.716881	-2.53108	0.0025	0.0173186	yes
ENSSSCT00000006276	ENSSSCG00000005707	FIBCD1	1:270918247-270956290	0.860885	0.154943	-2.47409	5e-05	0.000654966	yes
ENSSSCT00000006280	ENSSSCG00000005711	NUP214	1:271104032-271210323	2.56097	1.02223	-1.32497	0.0002	0.00220367	yes
ENSSSCT00000006285	ENSSSCG00000005715	PRRC2B	1:271336385-271430916	7.64748	3.5233	-1.11806	0.0004	0.00392923	yes
ENSSSCT00000006289	ENSSSCG00000005719	RAPGEF1	1:271496433-271564144	12.8407	6.06598	-1.08191	5e-05	0.000654966	yes
ENSSSCT00000006308	ENSSSCG00000005737	GFI1B	1:272701926-272716963	1.12585	0.53237	-1.08051	0.00105	0.00862179	yes
ENSSSCT00000006323	ENSSSCG00000005751	COL5A1	1:273956342-274082908	46.5994	26.8697	-0.79433	0.0007	0.00622013	yes
ENSSSCT00000006344	ENSSSCG00000005768	-	1:96680375-96765128	5.9669	13.9218	1.22229	0.00235	0.0165151	yes
ENSSSCT00000006358	ENSSSCG00000005782	TM2D3	1:145359729-145371632	2.12981	5.44131	1.35323	0.0022	0.0156489	yes
ENSSSCT00000006418	ENSSSCG00000005839	FBXW5	AEMK02000682.1:917864-920576	9.55562	5.92903	-0.688554	0.00295	0.0198163	yes
ENSSSCT00000006420	ENSSSCG00000005841	RABL6	AEMK02000682.1:982192-1007572	8.86641	3.69432	-1.26304	5e-05	0.000654966	yes
ENSSSCT00000006421	ENSSSCG00000005842	TMEM141	AEMK02000682.1:1019502-1021393	6.52024	15.7811	1.2752	5e-05	0.000654966	yes
ENSSSCT00000006474	ENSSSCG00000005895	C8orf82	4:275930-277458	12.8145	6.60822	-0.955448	0.00135	0.0106226	yes
ENSSSCT00000006486	ENSSSCG00000005906	CPSF1	4:383003-393660	9.95959	4.78518	-1.05751	5e-05	0.000654966	yes
ENSSSCT00000006491	ENSSSCG00000005911	OPLAH	4:630479-641073	7.94234	4.12242	-0.946072	5e-05	0.000654966	yes
ENSSSCT00000006492	ENSSSCG00000005912	GPAA1	4:613839-618143	14.8552	9.59114	-0.631189	0.0039	0.0246931	yes
ENSSSCT00000006513	ENSSSCG00000005933	CHRAC1	4:3025881-3028809	6.18266	10.0445	0.700109	0.007	0.0392272	yes
ENSSSCT00000006548	ENSSSCG00000005965	MYC	4:12455655-12459769	14.1146	4.40643	-1.67951	5e-05	0.000654966	yes
ENSSSCT00000006566	ENSSSCG00000005983	ATAD2	4:16012272-16082375	0.574908	1.90052	1.72499	0.00085	0.00728631	yes
ENSSSCT00000006575	ENSSSCG00000005992	SHAS2	4:17582848-17675609	0.614329	2.14192	1.80182	5e-05	0.000654966	yes
ENSSSCT00000006587	ENSSSCG00000006003	MAL2	4:19582574-19637000	0.0698031	0.491892	2.81698	0.00155	0.0118729	yes
ENSSSCT00000006610	ENSSSCG00000006023	SYBU	4:27899433-27974660	0.532176	2.15545	2.01801	5e-05	0.000654966	yes
ENSSSCT00000006621	ENSSSCG00000006032	EMC2	4:29024669-29079125	5.0697	13.2841	1.38973	0.0008	0.00694907	yes
ENSSSCT00000006622	ENSSSCG00000006033	EIF3E	4:29289331-29345385	34.3045	113.101	1.72114	5e-05	0.000654966	yes
ENSSSCT00000006637	ENSSSCG00000006048	DCAF13	4:33673827-33704458	6.23503	11.1078	0.833103	0.001	0.00829782	yes
ENSSSCT00000006638	ENSSSCG00000006049	SLC25A32	4:33704726-33727794	1.42945	3.00454	1.07169	0.00055	0.0050956	yes
ENSSSCT00000006640	ENSSSCG00000006051	CTHRC1	4:33759547-33771585	3.19256	6.74702	1.07954	0.0005	0.00469914	yes
ENSSSCT00000006641	ENSSSCG00000006052	FZD6	4:33811283-33843294	2.26787	6.45903	1.50998	5e-05	0.000654966	yes
ENSSSCT00000006661	ENSSSCG00000006070	COX6C	4:37074365-37819717	34.7224	124.643	1.84387	5e-05	0.000654966	yes
ENSSSCT00000006675	ENSSSCG00000006084	MTDH	4:39051467-39113899	4.74374	10.5076	1.14734	0.00015	0.00172262	yes
ENSSSCT00000006679	ENSSSCG00000006088	SDC2	4:40001394-40129797	3.22827	6.79684	1.0741	5e-05	0.000654966	yes
ENSSSCT00000006687	ENSSSCG00000006096	INTS8	4:41802993-41878690	4.89685	8.76067	0.839187	0.00255	0.0176062	yes
ENSSSCT00000006691	ENSSSCG00000006100	VIRMA	4:42162337-42237427	4.54849	14.5628	1.67883	5e-05	0.000654966	yes
ENSSSCT00000006706	ENSSSCG00000006581	-	4:96030568-96041858	0.830655	2.86609	1.78676	0.0093	0.0493069	yes
ENSSSCT00000006712	ENSSSCG00000006120	OTUD6B	4:45776587-45793161	3.6491	17.4324	2.25616	5e-05	0.000654966	yes
ENSSSCT00000006717	ENSSSCG00000006125	CALB1	4:46700874-46725197	0.167341	0.544357	1.70176	0.00455	0.0277462	yes
ENSSSCT00000006718	ENSSSCG00000006126	DECR1	4:46730460-46768331	12.101	53.6263	2.14782	5e-05	0.000654966	yes
ENSSSCT00000006734	ENSSSCG00000006141	CA3	4:51212589-51238746	172.82	569.865	1.72135	5e-05	0.000654966	yes
ENSSSCT00000006745	ENSSSCG00000006151	SNX16	4:54801357-54837981	1.48384	6.7337	2.18206	5e-05	0.000654966	yes
ENSSSCT00000006749	ENSSSCG00000006155	ZBTB10	4:56138087-56174938	5.69379	10.1907	0.839797	0.0001	0.00122288	yes
ENSSSCT00000006756	ENSSSCG00000006162	ZC2HC1A	4:57761255-57819895	2.39584	4.29687	0.842755	0.002	0.0145715	yes
ENSSSCT00000006757	ENSSSCG00000006163	PKIA	4:57872114-57897303	57.2842	192.134	1.74591	5e-05	0.000654966	yes
ENSSSCT00000006766	ENSSSCG00000006172	PI15	4:61113291-61142867	7.32779	22.2119	1.59988	5e-05	0.000654966	yes
ENSSSCT00000006768	ENSSSCG00000006174	JPH1	4:61628298-61716544	55.5891	33.1339	-0.746493	0.0018	0.0134273	yes
ENSSSCT00000006769	ENSSSCG00000006175	LY96	4:61926056-61950697	2.89326	6.95951	1.26629	0.0015	0.0115715	yes
ENSSSCT00000006777	ENSSSCG00000006183	SBSPON	4:62756272-62791608	0.214169	1.54991	2.85536	5e-05	0.000654966	yes
ENSSSCT00000006786	ENSSSCG00000006192	LACTB2	4:64710710-64748937	10.4952	17.7218	0.755798	0.0009	0.00763745	yes
ENSSSCT00000006798	ENSSSCG00000006203	COPS5	4:67738938-67758098	18.0684	27.9002	0.626808	0.0049	0.0293858	yes
ENSSSCT00000006805	ENSSSCG00000006209	VCPIP1	4:68073270-68108130	4.33228	8.41533	0.957892	5e-05	0.000654966	yes
ENSSSCT00000006809	ENSSSCG00000006213	ADHFE1	4:68250644-68285422	0.170244	1.36306	3.00118	5e-05	0.000654966	yes
ENSSSCT00000006814	ENSSSCG00000006218	PDE7A	4:68779421-68896583	25.1005	16.4931	-0.605852	0.00885	0.0474279	yes
ENSSSCT00000006816	ENSSSCG00000006220	ARMC1	4:68983011-69016081	4.79168	14.6015	1.60751	5e-05	0.000654966	yes
ENSSSCT00000006828	ENSSSCG00000006231	CHD7	4:72573565-72694141	3.52768	2.3363	-0.594494	0.00815	0.0443748	yes
ENSSSCT00000006829	ENSSSCG00000006232	RAB2A	4:72800572-72882208	24.3194	47.0302	0.951481	5e-05	0.000654966	yes
ENSSSCT00000006834	ENSSSCG00000006237	SDCBP	4:74236423-74338428	20.0935	34.5944	0.783807	0.00315	0.020865	yes
ENSSSCT00000006838	ENSSSCG00000006240	FAM110B	4:74612889-74614005	1.96777	0.434953	-2.17763	5e-05	0.000654966	yes
ENSSSCT00000006855	ENSSSCG00000006256	SOX17	4:76855150-76857176	4.39305	1.16632	-1.91326	5e-05	0.000654966	yes
ENSSSCT00000006859	ENSSSCG00000006260	-	4:77083835-77105013	6.96746	17.9777	1.36751	5e-05	0.000654966	yes
ENSSSCT00000006860	ENSSSCG00000006261	TCEA1	4:77109740-77138928	5.01361	12.8189	1.35434	0.00045	0.0043236	yes
ENSSSCT00000006873	ENSSSCG00000006274	PRKDC	4:79672782-79845655	5.53738	2.53779	-1.12563	5e-05	0.000654966	yes
ENSSSCT00000006880	ENSSSCG00000006280	GORAB	4:80569859-80590960	1.54006	4.02168	1.38481	5e-05	0.000654966	yes
ENSSSCT00000006882	ENSSSCG00000006282	KIFAP3	4:80857343-81105808	3.06909	9.35428	1.60781	0.0074	0.0410354	yes
ENSSSCT00000006906	ENSSSCG00000006301	TIPRL	4:82757471-82794553	4.51189	10.2966	1.19037	5e-05	0.000654966	yes
ENSSSCT00000006913	ENSSSCG00000006308	CREG1	4:83458418-83586639	7.5458	34.0018	2.17186	5e-05	0.000654966	yes
ENSSSCT00000006918	ENSSSCG00000006311	DUSP27	4:83870907-83902326	20.8378	38.065	0.869262	0.00015	0.00172262	yes
ENSSSCT00000006925	ENSSSCG00000006318	TADA1	4:84174469-84187553	2.92375	6.29388	1.10613	0.0051	0.0303144	yes
[truncated: 22,259 more rows]

## Sheet: C
Different expression between LT1D and LT90D libraries
[truncated: 21,494 more rows]

## Sheet: D
Different expression between LW1D and LW90D libraries
[truncated: 20,668 more rows]

[truncated: 1 more sheets: E]
