# Supplementary material for: Identification of CircRNA-Associated ceRNA Networks Using Longissimus Thoracis of Pigs of Different Breeds and Growth Stages
Source: Research Square preprint supplement (doi:10.21203/rs.3.rs-852221/v1), 2021-11-30
Supplement: Supplementary file 4 [file 8d1848d5fe7bc7e3bb611950.xlsx]

## Sheet: A
GO analysis of differently expressed genes between LT1D and LW1D samples
Term	Count	%	Genes	P value
GO:0050821~protein stabilization	27	1.01887	USP2, CLU, HCFC1, IFI30, CCT2, CALR, PTEN, CDC37, PLPP3, PFN2, BAG6, STX12, MORC3, BAG3, SOX17, USP33, CDC37L1, DVL3, CREB1, FLOT2, IGF1, LAMP2, EP300, MSX1, CCT8, MDM4, WIZ	0.000213571
GO:0008286~insulin receptor signaling pathway	15	0.566038	CAV2, SOGA1, BAIAP2, PDK4, PTPRA, GPLD1, FOXO1, SOCS7, IRS1, PHIP, GSK3A, SH2B2, ZNF106, PTPN1, AKT2	0.000231559
GO:0006635~fatty acid beta-oxidation	12	0.45283	ACOX1, ACAA2, PPARD, ACADM, ABCD1, PEX5, DECR1, SESN2, ACAT1, CROT, SLC25A17, ACAA1	0.000260895
GO:0001525~angiogenesis	30	1.13208	FGFR1, CAV1, WASF2, ANPEP, ELK3, PTEN, NOV, HOXA3, S1PR1, CTGF, ITGAV, HOXA7, SERPINE1, ROBO4, PLCD1, CALCRL, SOX17, TMEM100, ANGPT2, RAMP1, ANGPTL4, RAMP2, MYH9, ANXA2, SRPX2, PLXDC1, PECAM1, VEGFA, LOC100736898, ENG	0.00033337
GO:0002089~lens morphogenesis in camera-type eye	6	0.226415	TDRD7, SOX11, NECTIN3, PITX3, CITED2, CTNNB1	0.000600393
GO:0035556~intracellular signal transduction	53	2	PLEKHM1, RPS6KB1, LOC100526190, NOD1, GUCY1A3, TLK1, TLK2, PLCB1, AKT2, PRKCA, IRAK1, SOCS2, PKN2, SOCS7, SRPK1, SS18, PSEN1, PSEN2, ASB1, ASB3, ASB5, ASB4, UNC13B, MELK, ASB7, ASB6, MKNK2, STK17B, KIT, ASB15, ASB18, IRAK4, PLCL1, SH2B2, PLCD1, SH2B1, STK38L, TEC, DVL3, GPR155, TGFBR1, SMAD2, GUCY2C, CCDC68, LOC100624152, WSB1, SH3BP5, RPS6KA3, AIDA, RPS6KA2, POLR2M, JAK1, JAK2	0.000720377
GO:0031648~protein destabilization	12	0.45283	SENP2, RNF5, CCDC88C, PRKDC, MDM2, FBXO4, SOX17, MYLIP, CTSH, FBXL3, NCLN, TRIM21	0.00102441
GO:0032465~regulation of cytokinesis	9	0.339623	BBS4, PLK3, CCP110, LOC106504088, BECN1, PIK3C3, CETN2, CALM2, PRPF40A	0.00108712
GO:0006511~ubiquitin-dependent protein catabolic process	26	0.981132	USP30, USP8, USP2, COPS3, USP18, BAG6, CUL9, LOC100520499, PSMD3, USP36, USP33, USP15, FBXO8, USP1, SKP2, LOC106504060, UBE2N, PSMA1, USP28, LOC100521136, PSMA6, PSMA3, USP47, UCHL3, USP25, USP45	0.00177723
GO:0051091~positive regulation of sequence-specific DNA binding transcription factor activity	18	0.679245	MBTPS2, ARID5B, KIT, FZD4, PTEN, PPARGC1A, SRF, PLPP3, TRIM21, PPARGC1B, CTNNB1, JUP, HDAC4, EP300, GTF2A2, RGCC, PPRC1, LRP5	0.00218131
GO:0046777~protein autophosphorylation	26	0.981132	STK16, FGFR1, NEK2, ERBB2, MKNK2, KIT, UHMK1, CAMKK2, SLK, CLK4, TEK, CAMK2D, EEF2K, PRKACA, IRAK1, STK25, TRPM7, STK26, TAOK3, PIM1, KDR, PRKD2, JAK2, MTOR, LRRK2, MELK	0.00353202
GO:0051259~protein oligomerization	11	0.415094	CAV2, IRAK1, STX2, PFKL, TEK, NPM1, CAMK2D, SNX2, NUFIP1, GRHPR, SLC9A1	0.00404383
GO:0034333~adherens junction assembly	6	0.226415	JUP, RAMP2, ZNF703, TBCD, VCL, CTNNB1	0.00419366
GO:0030512~negative regulation of transforming growth factor beta receptor signaling pathway	12	0.45283	VASN, ASPN, RASL11B, CAV2, CAV1, ADAMTSL2, HTRA1, SMAD6, ZNF451, CD109, BCL9L, HSPA5	0.00423281
GO:0018105~peptidyl-serine phosphorylation	24	0.90566	PRKCA, CSNK1A1, CDK1, MKNK2, PKN2, FOXO1, PRKDC, LOC100523244, RICTOR, UHMK1, PRKD2, RPS6KA2, MORC3, MAP3K10, CAMK2D, PKD1, PRKACA, TNKS, MTOR, TLK2, LRRK2, STK38L, PRKD3, AKT2	0.00433591
GO:0016525~negative regulation of angiogenesis	13	0.490566	ROCK2, TNMD, DCN, STAT1, EPHA2, GTF2I, HOXA5, TEK, RGCC, CX3CR1, AMOT, TCF4, ANGPT2	0.0056412
GO:0032869~cellular response to insulin stimulus	12	0.45283	MYO5A, WDTC1, KAT2B, GOT1, ENPP1, SLC2A4, DENND4C, FOXO1, PRKDC, RPS6KB1, PARP1, STAT1	0.005713
GO:0045444~fat cell differentiation	15	0.566038	BBS4, STEAP4, BBS7, ARID5B, SMAD6, TMEM120B, SOCS7, NR4A3, TCF7L2, SENP2, ATF5, EP300, ID4, PLCB1, FBXO9	0.00658846
GO:0042771~intrinsic apoptotic signaling pathway in response to DNA damage by p53 class mediator	9	0.339623	USP28, EP300, BAG6, MSH2, BCL3, RPS27L, SNW1, TOPORS, DYRK2	0.00692331
GO:0032922~circadian regulation of gene expression	13	0.490566	MAGED1, PPARA, NAMPT, TOP1, CRY2, USP2, GFPT1, LOC100523244, PER3, BHLHE41, PPP1CC, MYBBP1A, PPARGC1A	0.00733259
GO:0010506~regulation of autophagy	10	0.377358	HMGB1, CISD2, DRAM2, NRBF2, SOGA1, RRAGD, USP33, ABL2, DRAM1, RRAGC	0.00746976
GO:0045725~positive regulation of glycogen biosynthetic process	6	0.226415	GCK, PPP1R3G, IGF1, DYRK2, IRS1, AKT2	0.00817168
GO:0070555~response to interleukin-1	6	0.226415	PRKCA, HDAC4, TNFRSF11A, IGBP1, YTHDC2, CITED1	0.00817168
GO:0000042~protein targeting to Golgi	6	0.226415	PACS1, OPTN, GOLGA4, TRIP11, GCC2, RAB33B	0.00817168
GO:0006457~protein folding	25	0.943396	TMX4, FKBP4, TMX3, VBP1, PDIA6, PDIA4, CALR, CDC37, DNAJA1, PPIL3, HSPE1, CDC37L1, DNAJC1, PPWD1, NUDC, TXNL1, HSP90AA1, CWC27, AARS, PPIA, TBCD, CCT8, PFDN4, DNAJB1, DNAJB4	0.00847968
GO:0031146~SCF-dependent proteasomal ubiquitin-dependent protein catabolic process	8	0.301887	FBXO39, RNF7, FBXW5, FBXL5, FBXO4, FBXO9, FBXL3, CUL1	0.008964
GO:0030036~actin cytoskeleton organization	20	0.754717	RHOJ, ABLIM2, SDAD1, ROCK2, WASF2, ARHGEF17, TMSB10, CAPZB, RHOU, DAAM2, PFN2, KRAS, TMSB15A, AMOT, SDCBP, SH2B2, TMSB4X, MKL1, LOC397689, ABL2	0.00916518
GO:0042110~T cell activation	7	0.264151	CD48, FYN, NCK1, SMAD3, AZI2, DPP4, DLG1	0.0114354
GO:0009615~response to virus	13	0.490566	ODC1, ZC3HAV1, CREBZF, CLU, RSAD2, CCL5, NPC2, DDX3X, BCL3, EEF1G, DDX21, STMN1, URI1	0.0118871
GO:0001947~heart looping	12	0.45283	MIB1, LOC100624385, KIF3A, TMED2, IFT57, PKD2, AHI1, SMAD3, SOX17, SRF, ENG, CITED2	0.0126661
GO:0033539~fatty acid beta-oxidation using acyl-CoA dehydrogenase	8	0.301887	ACOX2, ACOX1, ACADSB, ACADM, IVD, ACADL, ETFB, ETFA	0.0131237
GO:0048009~insulin-like growth factor receptor signaling pathway	4	0.150943	GRB10, IGF1, PLCB1, IRS1	0.0152819
GO:0033627~cell adhesion mediated by integrin	5	0.188679	NOV, ICAM1, ITGA6, ITGB6, ITGB1	0.0163875
GO:0010608~posttranscriptional regulation of gene expression	5	0.188679	CAV1, TDRD7, RC3H2, FBXO4, CDC37	0.0163875
GO:0050919~negative chemotaxis	7	0.264151	PLXNA3, SEMA4G, PDGFA, SEMA3G, ITGAV, LOC100736872, SEMA4C	0.0172883
GO:0045787~positive regulation of cell cycle	7	0.264151	FGFR1, RARA, GDPD5, NR4A3, CALR, TRIM21, CITED2	0.0172883
GO:0045944~positive regulation of transcription from RNA polymerase II promoter	89	3.35849	NAMPT, MYOD1, ARID4A, COPS5, TLR3, FOXO1, CNOT7, MED21, HOXD10, CTNNB1, MAMSTR, HSPH1, ZNF148, PCBP1, GTF2A2, RARA, TOP2A, MYC, CHUK, SERTAD1, TBL1XR1, NCOA7, CCNC, CDK7, RB1, LPIN1, PPARGC1A, AHR, PPARGC1B, SENP2, PRKD2, SS18, MTF2, NCK1, ZMIZ1, IGBP1, RGCC, VGLL2, MOSPD1, HMGB1, CRLF3, LUM, PRKDC, NUFIP1, NFIX, FHL5, DCN, IL33, PAXBP1, TCF7L2, SUMO2, CHD7, DDX3X, LOC100524867, AGO1, PKD2, AGO2,…	0.0179464
GO:0035914~skeletal muscle cell differentiation	10	0.377358	MEF2D, MYOD1, COPS2, MAFF, ATF3, SOX11, FOXN2, BCL9L, RB1, CITED2	0.0180383
GO:0001889~liver development	10	0.377358	CEBPA, MAN2A1, ACADM, JARID2, RB1CC1, SMAD3, PKD1, PIK3CA, HGF, CITED2	0.0180383
GO:0042787~protein ubiquitination involved in ubiquitin-dependent protein catabolic process	22	0.830189	DZIP3, LOC100518083, LOC100511906, HACE1, MYLIP, LOC106504060, CUL2, CUL5, RNF7, LOC106504088, BTBD1, RNF5, KLHL25, KLHL28, KLHL15, HECTD2, MDM2, CUL1, RNF146, KLHL20, HECTD1, RNF145	0.0181816
GO:0000281~mitotic cytokinesis	9	0.339623	KIF23, BBS4, USP8, ANLN, MITD1, CEP55, SNX33, STMN1, SPAST	0.018595
GO:0016567~protein ubiquitination	24	0.90566	SOCS2, SOCS7, SOCS5, KLHL4, KLHL2, CDC42, KBTBD2, CRBN, FBXW5, CUL9, KLHL15, KBTBD8, ASB1, FBXL5, MDM2, KLHL24, CAND1, NFE2L2, KLHL23, FBXO21, ASB5, FBXO9, ASB7, ASB6	0.0187329
GO:0007179~transforming growth factor beta receptor signaling pathway	12	0.45283	WFIKKN2, FUT8, SMAD6, TGFBR1, COL3A1, SMAD3, MSTN, SMAD2, HPGD, ENG, CITED1, CITED2	0.0200103
GO:0055088~lipid homeostasis	10	0.377358	CEBPA, ACOX2, ACOX1, ACADSB, ACADM, NR1D2, IVD, ACADL, USF2, ETFA	0.0232342
GO:2001237~negative regulation of extrinsic apoptotic signaling pathway	10	0.377358	ZMYND11, ITGA6, LGALS3, HTT, RB1CC1, ITGAV, IGF1, RPS6KB1, SGMS1, TCF7L2	0.0232342
GO:0001570~vasculogenesis	12	0.45283	RAMP2, CAV1, AGGF1, ZMIZ1, AMOT, QKI, TMEM100, SOX17, FZD4, EPHA2, CITED1, CITED2	0.0246799
GO:0005977~glycogen metabolic process	7	0.264151	PPP1R3D, PPP1R3C, PPP1R3B, IL6ST, PHKB, SLC37A4, UGP2	0.0249085
GO:0007052~mitotic spindle organization	7	0.264151	CCNB1, SBDS, WDR62, GPSM2, AURKB, STMN1, SMC3	0.0249085
GO:0006446~regulation of translational initiation	8	0.301887	KLHL25, EIF3E, EIF3L, EIF3I, EIF3J, GLE1, EIF3M, CTIF	0.0252605
GO:0030032~lamellipodium assembly	8	0.301887	S1PR1, NCK1, WASF2, NUP85, SH2B1, KIT, CAPZB, VCL	0.0252605
GO:0042149~cellular response to glucose starvation	8	0.301887	BECN1, IMPACT, PIK3C3, ASNS, NFE2L2, HSPA5, MYBBP1A, HIGD1A	0.0252605
GO:0007229~integrin-mediated signaling pathway	15	0.566038	ADAM10, FUT8, ADAMTS20, COL3A1, ITGA4, ITGB1, ITGA6, ITGA5, CTGF, ITGAV, SEMA7A, ITGA8, ITGB6, TYROBP, TEC	0.0260123
GO:0032436~positive regulation of proteasomal ubiquitin-dependent protein catabolic process	13	0.490566	RNF125, CSNK1A1, HSPBP1, SUMO2, BBS7, ZFAND2A, CLU, MDM2, LOC100523244, SOCS5, IL33, LRRK2, CBFA2T3	0.027127
GO:0017015~regulation of transforming growth factor beta receptor signaling pathway	5	0.188679	ZNF703, SOX11, SMAD3, SMAD2, ENG	0.0285813
GO:0007015~actin filament organization	14	0.528302	PDLIM3, TMSB10, TPM4, PPARGC1B, TMSB15A, LOC100524867, NCK1, TMOD3, KPTN, TMSB4X, WASL, LMOD2, LMOD3, DLG1	0.0290882
GO:0034613~cellular protein localization	10	0.377358	CDC42, LAMTOR3, FRMD6, HEPACAM, AHI1, AMOT, LOC100523244, ID4, ZDHHC18, LRRK2	0.0294148
GO:0007155~cell adhesion	30	1.13208	LOC106504114, ACHE, IGFBP7, SHAS2, POSTN, CLDN11, LOC100520329, VCL, CTNNB1, NOV, CD9, RGMB, AGGF1, CTGF, ITGAV, AATF, THBS3, SPP1, ICAM1, NECTIN3, TINAGL1, CERCAM, COL5A1, NCAM1, VWF, LYVE1, ITGA6, HAS1, CX3CR1, ENG	0.0314842
GO:0043491~protein kinase B signaling	9	0.339623	IGF1, PIK3CA, RPS6KB1, TMEM100, CCL5, SESN2, PTEN, EPHA2, SETX	0.0316677
GO:0019915~lipid storage	9	0.339623	PLIN5, CAV1, CRY2, GM2A, HEXA, ABHD5, CIDEA, LDAH, ACVR1C	0.0316677
GO:0006383~transcription from RNA polymerase III promoter	6	0.226415	POLR3F, POLR2K, POLR1D, GTF3C6, POLR3A, POLR3D	0.0335187
GO:0001702~gastrulation with mouth forming second	6	0.226415	RNF2, UGDH, AMOT, PLPP3, LRP5, CTNNB1	0.0335187
GO:0032873~negative regulation of stress-activated MAPK cascade	4	0.150943	IGBP1, FOXO1, PBK, MYC	0.0335736
GO:2000573~positive regulation of DNA biosynthetic process	4	0.150943	NOX4, PRKD2, HGF, MYC	0.0335736
GO:0001731~formation of translation preinitiation complex	7	0.264151	EIF3H, EIF3E, EIF3L, EIF3I, EIF3J, DENR, EIF3M	0.0344752
GO:0043066~negative regulation of apoptotic process	43	1.62264	MTDH, PRKDC, FOXO1, ASNS, PTEN, NAA35, SETX, TMF1, CITED2, BAG6, ATG5, NPM1, DNAJA1, DAD1, BCL3, AATF, RARA, GLO1, HSPA5, FAS, CAT, MYC, KLHL20, CDK1, ACTC1, ADAMTS20, BECN1, SMAD6, PIM1, IGF1, AHI1, MRE11, AMIGO2, ATF5, CTH, MSX1, PLK3, BNIP3L, PSEN2, MDM2, MDM4, PRNP, CTSH	0.0355982
GO:0071456~cellular response to hypoxia	13	0.490566	VASN, SLC8A3, ACAA2, PPARD, HP1BP3, PTEN, BNIP3L, RGCC, MDM2, FAM162A, MDM4, MTOR, HIGD1A	0.0386142
GO:0034142~toll-like receptor 4 signaling pathway	5	0.188679	HMGB1, IRAK1, LY96, TLR4, S100A14	0.044909
GO:2000811~negative regulation of anoikis	5	0.188679	CAV1, ITGA5, PDK4, PIK3CA, ITGB1	0.044909
GO:0043277~apoptotic cell clearance	5	0.188679	HMGB1, ITGAV, TGM2, PDIA6, RARA	0.044909
GO:0000422~mitophagy	10	0.377358	GABARAPL2, USP30, CISD2, ATG9A, ATG4C, ATG5, MAP1LC3B, RB1CC1, ATG2A, FUNDC1	0.0450291
GO:0050890~cognition	7	0.264151	GPR155, CHD7, LINS1, DOPEY2, LOC100518245, CBR3, CHMP2B	0.0461215
GO:0000122~negative regulation of transcription from RNA polymerase II promoter	64	2.41509	CPEB3, CBX4, ZEB2, AURKB, CTNNB1, LOC100623005, RARA, DDX20, SOX17, TPR, DLG1, TBL1XR1, RREB1, SOX11, ZHX2, RB1, PKIA, LOC100037950, EP300, MTF2, IGBP1, MDM2, MOSPD1, MDM4, FGFR1, ZMYND11, CAV1, MTDH, USP2, NFIX, ZNF366, CALR, TCF7L2, HIC1, NR1H2, ATN1, HOXA7, GATAD2A, BCL6, PER3, BCOR, TCF4, BRMS1L, CEBPA, DNMT3A, WDTC1, ZNF567, SMAD3, SNW1, NR4A3, PHF12, SHOX2, HDAC4, HDAC2, PLK3, SAP130, IRF2B…	0.0465749
GO:0060070~canonical Wnt signaling pathway	16	0.603774	FZD9, DVL3, TBL1XR1, PTEN, TCF7L2, FZD4, PLPP3, FZD6, CTNNB1, CDC42, SDC1, PSEN1, BCL9L, SOX17, MYC, LRP5	0.0487186
GO:0021762~substantia nigra development	9	0.339623	RAD1, ACTB, CDC42, ZNF148, CCDC14, YWHAQ, HSPA5, SYPL2, CALM2	0.0499108
GO:0001701~in utero embryonic development	28	1.0566	FGFR1, COPS3, JAG2, ITGB1, CTNNB1, EDNRA, CHD7, PLOD3, BTF3, TMEM100, INPP5B, MAFF, WDTC1, KIF3A, SMAD3, SMAD2, LIG4, MYH9, RNASEH2B, CCNB1, MAN2A1, MIB1, MSX1, CCNB2, ZMIZ1, AMOT, MAPK8IP3, BMPR1A	0.0521128
GO:0000082~G1/S transition of mitotic cell cycle	10	0.377358	EIF4E, PLK3, CDKN2C, CRLF3, SKP2, CAMK2D, ID4, RPS6KB1, ITGB1, RHOU	0.0545844
GO:0008283~cell proliferation	23	0.867925	POLR3G, PDK1, CDK1, COPS2, APC2, PAK1IP1, PIM1, PRKDC, LIG4, APPL2, TCF7L2, MRE11, DAZAP1, TACC2, USP28, ANXA7, PPP1R8, H3F3A, WDR12, GNG2, MDM4, CUL1, LOC100514009	0.0578675
GO:0006268~DNA unwinding involved in DNA replication	4	0.150943	MCM2, TOP2B, TOP2A, RAD51	0.0590856
GO:0045945~positive regulation of transcription from RNA polymerase III promoter	4	0.150943	CEBPA, ERBB2, MTOR, ZC3H8	0.0590856
GO:0042074~cell migration involved in gastrulation	4	0.150943	MEGF8, AMOT, SOX17, LRP5	0.0590856
GO:0048617~embryonic foregut morphogenesis	4	0.150943	SMAD3, SMAD2, SOX17, CTNNB1	0.0590856
GO:2001022~positive regulation of response to DNA damage stimulus	4	0.150943	BCLAF1, NSMCE4A, FMR1, MYC	0.0590856
GO:0006491~N-glycan processing	7	0.264151	MAN2A1, MAN1A2, FUT8, EDEM3, MAN1A1, EDEM2, USF3	0.05993
GO:0046627~negative regulation of insulin receptor signaling pathway	7	0.264151	GRB10, ENPP1, SOCS2, MSTN, RPS6KB1, LMBRD1, TRIM72	0.05993
GO:0000381~regulation of alternative mRNA splicing, via spliceosome	9	0.339623	RBFOX2, MYOD1, SRSF6, RBM15B, MAGOH, FMR1, RBMX, RBM25, UHMK1	0.061143
GO:0006338~chromatin remodeling	13	0.490566	LOC100620672, SATB1, HDAC4, TOP1, KAT2B, CHD7, RSF1, SMARCD3, CHD1, DEK, ARID1B, MYC, ZBTB1	0.0616354
GO:0043484~regulation of RNA splicing	6	0.226415	AGGF1, CLK4, RBM38, MBNL1, CLK1, HNRNPH1	0.0640053
GO:0021915~neural tube development	6	0.226415	PLOD3, PKD2, LOC100736872, PKD1, EPHA2, DCHS1	0.0640053
GO:0042632~cholesterol homeostasis	10	0.377358	NR1H2, SOAT1, CAV1, NPC2, NUS1, SLC37A4, EPHX2, MYLIP, EHD1, LRP5	0.0653639
GO:0046716~muscle cell cellular homeostasis	5	0.188679	MTM1, LAMP2, CFL2, MSTN, SRF	0.0654052
GO:0045892~negative regulation of transcription, DNA-templated	40	1.50943	COPS2, BCLAF1, LIMS1, ZBTB33, RSF1, ARID4A, FOXK1, HR, ELK3, CBFA2T3, CTNNB1, ZNF706, MAGED1, ZNF703, CRY2, SET, NR1D2, LANCL2, ATP8B1, BRD7, BCL3, PLCB1, KDM5C, NACC1, ZNF280C, ZNF280D, CREBZF, ZNF24, CENPF, SMAD2, RB1, SFMBT1, PPARGC1B, ATXN1, ATF5, YWHAQ, USP47, MAP3K10, ID4, MYBBP1A	0.0682272
GO:0031340~positive regulation of vesicle fusion	3	0.113208	ANXA1, ANXA2, AKT2	0.0713107
GO:0022028~tangential migration from the subventricular zone to the olfactory bulb	3	0.113208	OGDH, LRRK2, SRF	0.0713107
GO:1901844~regulation of cell communication by electrical coupling involved in cardiac conduction	3	0.113208	SRI, CAV1, HRC	0.0713107
GO:0044774~mitotic DNA integrity checkpoint	3	0.113208	TOP2B, TOP2A, LOC100514009	0.0713107
GO:0038033~positive regulation of endothelial cell chemotaxis by VEGF-activated vascular endothelial growth factor receptor signaling pathway	3	0.113208	PRKD2, VEGFA, KDR	0.0713107
GO:0034111~negative regulation of homotypic cell-cell adhesion	3	0.113208	ZNF703, CCM2L, RDX	0.0713107
GO:0043415~positive regulation of skeletal muscle tissue regeneration	3	0.113208	MYOD1, PPARD, HOPX	0.0713107
GO:0042752~regulation of circadian rhythm	9	0.339623	MAGED1, PPARA, NR1D2, ROCK2, MAPK9, PRKDC, LOC100523244, TOP2A, PPARGC1A	0.0738343
GO:0045727~positive regulation of translation	9	0.339623	ABCF1, ERBB2, NPM1, FMR1, BCL3, GUF1, MTOR, RPS4X, LARP4B	0.0738343
GO:0007157~heterophilic cell-cell adhesion via plasma membrane cell adhesion molecules	9	0.339623	ALCAM, VCAM1, LOC100522562, ITGA5, NECTIN3, ADGRL1, CD164, CD200, DCHS1	0.0738343
GO:0018107~peptidyl-threonine phosphorylation	7	0.264151	CDK1, MAP3K10, CAMK2D, FOXO1, TNKS, PRKACA, MTOR	0.0759313
GO:0007224~smoothened signaling pathway	11	0.415094	LOC100624385, KIF3A, IFT46, BBS7, LOC100515627, IFT57, TCTN3, MAP3K10, HHIP, DYRK2, BOC	0.0795663
GO:0035264~multicellular organism growth	15	0.566038	TBL1XR1, WDTC1, LOC100738594, ARID5B, TNKS2, NDUFS6, CDC42, ATF5, SLC25A25, TMED2, HOXA5, H3F3A, RARA, MTOR, SLITRK6	0.0805765
GO:0060021~palate development	13	0.490566	FRAS1, WFIKKN2, DHRS3, MSX1, CHD7, BBS7, CSRNP1, ARID5B, PAK1IP1, LOC100736898, SMAD2, BCOR, BMPR1A	0.0811832
GO:0030155~regulation of cell adhesion	8	0.301887	ICAM1, CYTIP, S1PR1, JAG2, PKD1, JAK2, SRF, ABL2	0.0833972
GO:0032212~positive regulation of telomere maintenance via telomerase	8	0.301887	NEK2, CCT8, CCT2, TNKS, AURKB, MAP2K7, POT1, CTNNB1	0.0833972
GO:0006397~mRNA processing	9	0.339623	RBFOX2, AGGF1, ZRANB2, THOC7, QKI, PRKACA, PTBP3, PTBP2, SMNDC1	0.087997
GO:1904355~positive regulation of telomere capping	5	0.188679	NEK2, TNKS, AURKB, MAP2K7, TNKS2	0.0899086
GO:0097009~energy homeostasis	5	0.188679	PRCP, PIK3CA, NR4A3, ACACB, OMA1	0.0899086
GO:0021510~spinal cord development	5	0.188679	SOX11, PKD2, PKD1, PTPRS, ZIC1	0.0899086
GO:0001649~osteoblast differentiation	15	0.566038	SYNCRIP, RBMX, TPM4, EPHA2, FBL, SHOX2, MEF2D, LOC100515627, SEMA7A, H3F3A, DDX21, CAT, MYBBP1A, RDH14, SPP1	0.0904878
GO:0000226~microtubule cytoskeleton organization	10	0.377358	SS18, CUL9, TBCD, MAP1A, OBSL1, VAMP4, MAP7D1, MAP7D2, WEE1, TACC2	0.0906838
GO:0006654~phosphatidic acid biosynthetic process	4	0.150943	SLC27A1, PLD1, ABHD5, AGPAT1	0.0911091
GO:0010613~positive regulation of cardiac muscle hypertrophy	4	0.150943	PDE5A, CAMK2D, IGF1, SLC9A1	0.0911091
GO:0051103~DNA ligation involved in DNA repair	4	0.150943	HMGB1, LIG4, PARP1, PARP2	0.0911091
GO:0090136~epithelial cell-cell adhesion	4	0.150943	CDC42, BVES, SRF, VCL	0.0911091
GO:0046889~positive regulation of lipid biosynthetic process	4	0.150943	ABHD6, CREB1, HSD17B13, MTOR	0.0911091
GO:0045947~negative regulation of translational initiation	4	0.150943	PAIP2, AGO2, RARA, TPR	0.0911091
GO:0042989~sequestering of actin monomers	4	0.150943	TWF1, TMSB15A, TMSB10, TMSB4X	0.0911091
GO:0007507~heart development	21	0.792453	RAMP2, BBS7, RBM20, TGFBR1, COL3A1, PDLIM3, PRKDC, EDNRA, MTHFD1, SENP2, EP300, BVES, RPS6KA2, RB1CC1, HOPX, PKD1, LOX, CALCRL, ADAM19, BCOR, LOC397689	0.0966522
GO:0006351~transcription, DNA-templated	57	2.15094	CCNT2, PPARA, MYOD1, PPARD, ATP1B4, FOXO1, ZNF518A, EPC2, LOC100738941, SMARCD3, MED27, RARA, BHLHE41, MYC, KDM5C, SATB1, POLR1E, LIN52, POLR1D, ZNF287, ZFX, LOC100152501, ARNTL, PPARGC1A, AHR, MED7, NFE2L3, MYBBP1A, TBX18, TRAPPC2, ABLIM2, LOC100511053, NFIX, LOC100521344, NR2C1, NR1D2, ZSCAN20, TEAD4, AGO2, BCL3, TCEA1, SIM1, MAFF, CREBZF, SMAD6, ZNF770, ZNF24, PPP1R10, SMAD3, SMAD2, TEAD3, STA…	0.0973084

## Sheet: B
GO analysis of differently expressed genes between LT1D and LT90D samples
Term	Count	%	Genes	P Value
GO:0001525~angiogenesis	28	1.45003	FGFR1, CAV1, EFNA1, FGF9, ENPEP, ELK3, EPHB3, PTEN, NOV, HOXA3, S1PR1, ITGAV, HOXA7, ROBO4, PLCD3, CALCRL, SOX17, TMEM100, ANGPT2, ANGPTL4, ACKR3, UBP1, VASH1, GPI, SRPX2, PECAM1, LOC100736898, ENG	1.36594e-05
GO:0007015~actin filament organization	16	0.828586	FSCN1, TMSB10, TPM1, TPM4, PPARGC1B, SORBS3, TMSB15A, RAC2, NCK1, FHOD3, TMOD3, TMSB4X, WASL, LMOD2, LMOD3, DLG1	0.000241967
GO:0016525~negative regulation of angiogenesis	12	0.62144	HOXA5, TEK, TNMD, CX3CR1, RGCC, STAT1, THBS1, TCF4, ANGPT2, THBS2, EPHA2, VASH1	0.00173136
GO:0051259~protein oligomerization	10	0.517866	CAV2, STX2, PFKL, CAMK2G, TEK, LOC100523672, CAMK2D, SNX2, PFKM, SLC9A1	0.00195655
GO:0001937~negative regulation of endothelial cell proliferation	9	0.46608	CAV2, CAV1, AIMP1, TNMD, RGCC, SYNJ2BP, STAT1, THBS1, VASH1	0.00230013
GO:0035914~skeletal muscle cell differentiation	10	0.517866	PLAGL1, MEF2D, MYOD1, COPS2, MAFF, ATF3, SOX11, ANKRD2, FOXN2, RB1	0.00267179
GO:0043508~negative regulation of JUN kinase activity	5	0.258933	AIDA, SFRP2, HIPK3, DNAJA1, DUSP10	0.00272888
GO:0002504~antigen processing and presentation of peptide or polysaccharide antigen via MHC class II	6	0.31072	SLA-DMA, SLA-DQB1, SLA-DQA1, SLA-DRA, SLA-DOA, SLA-DMB	0.00403365
GO:0046777~protein autophosphorylation	21	1.08752	STK16, FGFR1, TRPM7, CAMK2G, ERBB2, TAOK3, KIT, EPHB3, UHMK1, KDR, PRKD2, SLK, ULK1, TEK, CLK4, EEF2K, CAMK2D, JAK2, PRKACA, PAK1, LRRK2	0.00474861
GO:0045947~negative regulation of translational initiation	5	0.258933	EIF4EBP3, PAIP2, AGO2, RARA, TPR	0.00575124
GO:0055003~cardiac myofibril assembly	5	0.258933	ACTC1, TCAP, FHOD3, CSRP3, MYH10	0.00575124
GO:0043491~protein kinase B signaling	9	0.46608	IGF1, PIK3CA, RPS6KB1, TMEM100, CCL5, SESN2, PTEN, EPHA2, SETX	0.00594559
GO:0000122~negative regulation of transcription from RNA polymerase II promoter	55	2.84827	MEF2A, CPEB3, EFNA1, FGF9, ANKRD2, CBX4, ZEB2, YBX1, LOC100623005, RARA, SOX17, TPR, DLG1, RREB1, LDB1, SOX11, PKIG, ZHX2, RB1, PKIA, LOC100037950, ACVR2B, TIMELESS, IGBP1, MDM2, SEMA4D, FGFR1, CAV1, MTDH, USP2, TAF9B, TCF7L2, SORBS3, HOXA7, PER3, BCOR, TCF4, BRMS1L, SIM2, DNMT3A, ZNF567, SMAD7, TAF7, LMCD1, SMAD3, SMYD2, NR4A3, CTR9, HDAC2, ID2, SAP130, ZFHX3, ZBTB1, NCOR2, VLDLR	0.00610437
GO:0050821~protein stabilization	19	0.983946	SMAD7, USP2, FLOT2, CREB1, CLU, TAF9B, IGF1, IFI30, HCFC1, PTEN, PARK7, LAMP2, PFN2, STX12, MORC3, BAG3, SOX17, CDC37L1, GAPDH	0.00617007
GO:0032465~regulation of cytokinesis	7	0.362506	LOC106504088, BECN1, CETN2, CALM3, CALM2, CALM1, PRPF40A	0.00622772
GO:0010510~regulation of acetyl-CoA biosynthetic process from pyruvate	4	0.207147	PDK1, PDK2, PDK3, PDK4	0.00664424
GO:0006359~regulation of transcription from RNA polymerase III promoter	4	0.207147	POLR3G, POLR3F, TENM1, POLR3GL	0.00664424
GO:0097193~intrinsic apoptotic signaling pathway	6	0.31072	PPM1F, DDX3X, SGPP1, LOC100523672, CLU, MYC	0.00665577
GO:0032922~circadian regulation of gene expression	11	0.569653	MAGED1, NAMPT, PPARA, TOP1, ID2, USP2, GFPT1, PER3, PPP1CC, PPARGC1A, CLOCK	0.00748305
GO:0043066~negative regulation of apoptotic process	37	1.91611	HSP90AB1, ZFAND6, MTDH, TAF9B, FOXO1, ASNS, PTEN, SETX, TMF1, ATG5, DNAJA1, DAD1, BCL3, RARA, GLO1, FAS, MYC, CYR61, ACTC1, TBX3, ADAMTS20, BECN1, TMBIM6, DDB1, SMAD6, IGF1, AHI1, CAPN3, MRE11, AMIGO2, CTH, HIPK3, BNIP3L, PSEN2, MDM2, PRNP, ADAR	0.00788598
GO:0032436~positive regulation of proteasomal ubiquitin-dependent protein catabolic process	12	0.62144	RNF125, SUMO2, ARIH2, GCLC, SMAD7, ZFAND2A, CLU, MDM2, SOCS5, CBFA2T3, LRRK2, RNF14	0.00856011
GO:0033137~negative regulation of peptidyl-serine phosphorylation	7	0.362506	PPM1F, GPD1L, CAV1, SMAD7, NCK1, HGF, PAQR3	0.00894735
GO:0045070~positive regulation of viral genome replication	7	0.362506	PPIH, DDX3X, PPIA, DDB1, PKN2, SRPK1, ADAR	0.00894735
GO:0045944~positive regulation of transcription from RNA polymerase II promoter	71	3.67685	MYOD1, NAMPT, MEF2A, HMGN3, ARID4A, COPS5, TLR3, FOXO1, CNOT7, MED21, HSPH1, ZNF148, PCBP1, GTF2A2, RARA, TOP2A, MYC, SERTAD1, CYR61, CCNH, LDB1, NCOA7, RB1, LPIN1, PPARGC1A, PPARGC1B, AHR, GTF2H1, HOXD9, SENP2, PRKD2, ZMIZ1, NCK1, IGBP1, RGCC, PYGO1, VGLL2, NFE2L1, HMGB1, CRLF3, LUM, TAF9B, BMPR2, TCF7L2, NR2C2, PLAGL1, SUMO2, DDX3X, AGO2, BCL3, NFATC4, TCF4, SLC30A9, ETV4, ZNF567, TAF7, IGF1, A…	0.00976568
GO:0045931~positive regulation of mitotic cell cycle	8	0.414293	DUSP3, EIF4E, USP2, PKN2, ASNS, RPS6KB1, ABL1, PTPN11	0.0099372
GO:0050435~beta-amyloid metabolic process	5	0.258933	ACE, BECN1, PSEN2, IDE, MME	0.0103947
GO:0060021~palate development	13	0.673226	WFIKKN2, TBX3, ARID5B, PAK1IP1, TIPARP, EPHB3, ACVR2B, DHRS3, CSRNP1, INSIG1, LOC100736898, BCOR, BMPR1A	0.011128
GO:0009615~response to virus	11	0.569653	ODC1, DDX3X, XPR1, CLU, BCL3, RSAD2, DDX21, STMN1, URI1, CCL5, ENO1	0.0113199
GO:0060325~face morphogenesis	7	0.362506	CRISPLD1, CRISPLD2, CSRNP1, ARID5B, TIPARP, RRAS, PTPN11	0.0124206
GO:0045214~sarcomere organization	7	0.362506	TCAP, MYPN, CFL2, FHOD3, CASQ1, CAPN3, CASQ2	0.0124206
GO:0006094~gluconeogenesis	7	0.362506	GPD2, GPD1, GPI, ATF3, PGAM2, FBP2, PC	0.0124206
GO:0033539~fatty acid beta-oxidation using acyl-CoA dehydrogenase	7	0.362506	ACOX2, GCDH, LOC100622764, ACADSB, IVD, ACADL, ETFB	0.0124206
GO:0006635~fatty acid beta-oxidation	8	0.414293	CPT1B, PPARD, ABCD1, PEX5, DECR1, SESN2, HADHA, CROT	0.0130665
GO:0006511~ubiquitin-dependent protein catabolic process	19	0.983946	USP2, COPS3, USP1, SKP2, UBA6, UBE2N, USP28, PSMA1, LOC100625317, USP18, PSMA3, USP47, UCHL5, UBD, FBXO32, UCHL3, USP25, USP15, USP45	0.0133315
GO:0045669~positive regulation of osteoblast differentiation	10	0.517866	ACVR2B, SFRP2, IL6ST, SOX11, BMPR2, IGF1, GJA1, FBN2, BMPR1A, CYR61	0.0150041
GO:2000573~positive regulation of DNA biosynthetic process	4	0.207147	NOX4, PRKD2, HGF, MYC	0.0150992
GO:0032873~negative regulation of stress-activated MAPK cascade	4	0.207147	IGBP1, FOXO1, PBK, MYC	0.0150992
GO:0042593~glucose homeostasis	15	0.7768	PDK2, NUCKS1, SLC37A4, PDK4, ADGRF5, ADIPOR2, FOXO1, PFKM, FOXO3, SIDT2, TCF7L2, PTPN11, GPI, PPP1R3G, PRCP	0.0159023
GO:0034446~substrate adhesion-dependent cell spreading	9	0.46608	MICALL2, EFNA1, ITGA8, ITGAV, TEK, RADIL, EPHB3, ABL1, FZD4	0.0161236
GO:0001974~blood vessel remodeling	8	0.414293	ACVR2B, HOXA3, ATG5, LOC100523672, CCR2, BMPR2, LOC100736872, MDM2	0.0168444
GO:0000042~protein targeting to Golgi	5	0.258933	OPTN, GOLGA4, TRIP11, GCC2, RAB33B	0.016917
GO:0060548~negative regulation of cell death	8	0.414293	NOV, TXNDC12, TMEM109, SRSF6, SOX11, IMPACT, NCK1, CYR61	0.0213321
GO:0060070~canonical Wnt signaling pathway	14	0.725013	FZD9, PTK7, PTPRU, PTEN, TCF7L2, FZD4, TCF7L1, FZD6, FZD10, SFRP2, SOX17, EGF, MYC, LRP5	0.0239406
GO:0006885~regulation of pH	5	0.258933	PDK2, SLC9A6, SLC9A2, PDK4, SLC9A1	0.025506
GO:0060444~branching involved in mammary gland duct morphogenesis	5	0.258933	DDR1, TBX3, EPHA2, ETV4, LRP5	0.025506
GO:0046716~muscle cell cellular homeostasis	5	0.258933	MTM1, LAMP2, CFL2, MSTN, PFKM	0.025506
GO:0043537~negative regulation of blood vessel endothelial cell migration	5	0.258933	HMGB1, RGCC, THBS1, ANGPT2, VASH1	0.025506
GO:0002089~lens morphogenesis in camera-type eye	4	0.207147	TDRD7, SOX11, NECTIN3, PITX3	0.0274696
GO:0061178~regulation of insulin secretion involved in cellular response to glucose stimulus	4	0.207147	EPHA5, HMGN3, SIDT2, LRP5	0.0274696
GO:0006096~glycolytic process	7	0.362506	GPI, GCK, ENO3, PGAM2, PGK1, GAPDH, ENO1	0.0282496
GO:0060976~coronary vasculature development	6	0.31072	ADAMTS6, MEGF8, SMAD6, PTK7, PLXND1, MYH10	0.0285048
GO:0032435~negative regulation of proteasomal ubiquitin-dependent protein catabolic process	6	0.31072	HSP90AB1, UBXN1, MTM1, PBK, TLK2, PARK7	0.0285048
GO:0002027~regulation of heart rate	6	0.31072	GPD1L, CALM3, MDM2, CASQ2, CALM2, CALM1	0.0285048
GO:0005977~glycogen metabolic process	6	0.31072	PPP1R3D, IL6ST, PHKB, PHKA1, SLC37A4, PCDH12	0.0285048
GO:0006364~rRNA processing	9	0.46608	DIS3, SBDS, CCDC86, RPL26, UTP15, RRP9, GTF2H5, POP4, DDX52	0.0294191
GO:0000165~MAPK cascade	9	0.46608	MEF2D, CAV1, MEF2A, CCR5, EFNA1, TAOK3, CCL5, MYC, SETX	0.0294191
GO:0007155~cell adhesion	24	1.24288	PARVG, ITGAL, ICAM1, ACHE, HAPLN3, NECTIN3, POSTN, FES, CD63, NCAM1, NOV, CD9, RGMB, SORBS3, ITGA6, AGGF1, HAS1, ITGAV, CX3CR1, THBS1, THBS2, ENG, THBS3, CYR61	0.0313483
GO:0045892~negative regulation of transcription, DNA-templated	33	1.70896	DEAF1, COPS2, BCLAF1, LIMS1, GCLC, RSF1, FOXK1, ARID4A, HR, NOSTRIN, ELK3, CBFA2T3, ZNF706, MAGED1, ZNF703, SET, NR1D2, WWP1, BRD7, BCL3, PLCB1, ENO1, NKRF, ZNF24, CENPF, RB1, SFMBT1, CAPN3, PPARGC1B, PPM1F, ID2, SFRP2, USP47	0.0346241
GO:0042060~wound healing	9	0.46608	PPARA, PPARD, CCM2L, ERBB2, PECAM1, FGFR1OP2, PTK7, ELK3, PAK1	0.0351576
GO:0001701~in utero embryonic development	23	1.19109	FGFR1, MAFF, UBE2A, TBX3, COPS3, PTPRR, JAG2, GJA1, SMAD3, RNASEH2B, YBX1, EDNRA, GPI, MAN2A1, MIB1, CCNB2, ZMIZ1, BTF3, TMEM100, FOSL1, MYH10, BMPR1A, ADAR	0.0360875
GO:0097009~energy homeostasis	5	0.258933	PRCP, PIK3CA, NR4A3, ACACB, OMA1	0.0362775
GO:0000077~DNA damage checkpoint	6	0.31072	RAD1, USP28, HUS1, TIPRL, CLOCK, PTPN11	0.0373945
GO:0048661~positive regulation of smooth muscle cell proliferation	6	0.31072	ID2, IGF1, CALCRL, NR4A3, CCL5, STAT1	0.0373945
GO:0006366~transcription from RNA polymerase II promoter	17	0.880373	DEAF1, MYOD1, LCORL, NMI, RREB1, POLR2K, CCNH, LDB1, TAF9B, BMPR2, GTF2H1, PLAGL1, GTF2A1, HIF3A, LOC100624071, DDX21, NFIL3	0.0383644
GO:0007613~memory	8	0.414293	S100B, ITGA5, PAIP2, ITGA8, CREB1, FGF13, PLCB1, ATAD1	0.0395821
GO:0043353~enucleate erythrocyte differentiation	3	0.15536	ID2, CEBPG, RB1	0.0412312
GO:0042758~long-chain fatty acid catabolic process	3	0.15536	ABCD1, ACADL, LIPE	0.0412312
GO:0034111~negative regulation of homotypic cell-cell adhesion	3	0.15536	ZNF703, CCM2L, RDX	0.0412312
GO:0060316~positive regulation of ryanodine-sensitive calcium-release channel activity	3	0.15536	CALM3, CALM2, CALM1	0.0412312
GO:0051444~negative regulation of ubiquitin-protein transferase activity	3	0.15536	SMAD7, ABL1, PARK7	0.0412312
GO:0030801~positive regulation of cyclic nucleotide metabolic process	3	0.15536	CALM3, CALM2, CALM1	0.0412312
GO:0051343~positive regulation of cyclic-nucleotide phosphodiesterase activity	3	0.15536	CALM3, CALM2, CALM1	0.0412312
GO:0071233~cellular response to leucine	3	0.15536	UBR2, UBR1, SESN2	0.0412312
GO:0001947~heart looping	9	0.46608	MIB1, LOC100624385, TBX3, TMED2, AHI1, SMAD3, GJA1, SOX17, ENG	0.0416067
GO:0016579~protein deubiquitination	11	0.569653	USP28, USP18, LOC100625317, COPS5, USP2, USP47, UCHL5, UCHL3, USP25, USP15, USP45	0.042222
GO:0006002~fructose 6-phosphate metabolic process	4	0.207147	PFKL, GFPT1, FBP2, PFKM	0.0437584
GO:0010880~regulation of release of sequestered calcium ion into cytosol by sarcoplasmic reticulum	4	0.207147	CALM3, DHRS7C, CALM2, CALM1	0.0437584
GO:0045948~positive regulation of translational initiation	4	0.207147	DDX3X, RPS6KB1, BOLL, UHMK1	0.0437584
GO:0042989~sequestering of actin monomers	4	0.207147	TWF1, TMSB15A, TMSB10, TMSB4X	0.0437584
GO:0048745~smooth muscle tissue development	4	0.207147	ITGA8, TIPARP, ENG, DLG1	0.0437584
GO:0072593~reactive oxygen species metabolic process	7	0.362506	ND2, PDK4, PRDX4, PLA2R1, SESN2, LRRK2, CYR61	0.0440152
GO:0000281~mitotic cytokinesis	7	0.362506	KIF23, ANLN, SNX33, STMN1, SPAST, MYH10, APC	0.0440152
GO:0042752~regulation of circadian rhythm	8	0.414293	MAGED1, PPARA, ADCY1, ID2, TIMELESS, NR1D2, TOP2A, PPARGC1A	0.0474017
GO:0048704~embryonic skeletal system morphogenesis	8	0.414293	HOXD9, MEGF8, HOXA3, HOXA5, SOX11, HOXA7, COL11A1, DLG1	0.0474017
GO:0006607~NLS-bearing protein import into nucleus	6	0.31072	RANBP6, LOC100627792, KPNA5, KPNB1, KPNA1, LOC102166970	0.0478003
GO:0000184~nuclear-transcribed mRNA catabolic process, nonsense-mediated decay	6	0.31072	DCP2, PNRC2, MAGOH, MAGOHB, CTIF, UHMK1	0.0478003
GO:0016477~cell migration	18	0.93216	EFNA1, FSCN1, PTK7, ARPC5, ENPEP, CD63, EPHB3, SDC2, HOXA5, ITGAV, LOC100737060, PSTPIP1, JAK2, THBS1, LCP1, APC, PSTPIP2, PRPF40A	0.0483223
GO:0019827~stem cell population maintenance	9	0.46608	MED7, EIF4E, METTL14, TBX3, MED28, MED21, SMC3, CTR9, BMPR1A	0.0487934
GO:0070373~negative regulation of ERK1 and ERK2 cascade	9	0.46608	DUSP3, ATF3, C13H3ORF33, PTPRR, SYNJ2BP, NDRG2, ABL1, PTEN, DLG1	0.0487934
GO:0035567~non-canonical Wnt signaling pathway	5	0.258933	FZD9, FZD10, SFRP2, FZD4, FZD6	0.0492795
GO:0035904~aorta development	5	0.258933	ADAMTS6, SMAD6, LOX, PLXND1, MYH10	0.0492795
GO:0006468~protein phosphorylation	16	0.828586	STK16, PHKB, CREB1, PHKA1, HUS1, EIF2A, PBK, GUCY2C, ST3GAL1, CAMK2D, LOC100739691, PIK3CA, RARA, PRKACA, PAK1, NIM1K	0.0541054
GO:0060048~cardiac muscle contraction	6	0.31072	TCAP, MYL3, CAMK2D, CSRP3, TPM1, CASQ2	0.0597464
GO:0017015~regulation of transforming growth factor beta receptor signaling pathway	4	0.207147	ZNF703, SOX11, SMAD3, ENG	0.0637766
GO:0010388~cullin deneddylation	4	0.207147	COPS2, COPS5, COPS3, COPS4	0.0637766
GO:0021795~cerebral cortex cell migration	4	0.207147	CX3CR1, PEX5, PEX13, FGF13	0.0637766
GO:0033690~positive regulation of osteoblast proliferation	4	0.207147	ITGAV, ABL1, LRP5, CYR61	0.0637766
GO:0045333~cellular respiration	4	0.207147	ND1, NFATC4, NR4A3, PPARGC1A	0.0637766
GO:1902236~negative regulation of endoplasmic reticulum stress-induced intrinsic apoptotic signaling pathway	4	0.207147	TXNDC12, TMBIM6, LRRK2, PARK7	0.0637766
GO:0003151~outflow tract morphogenesis	7	0.362506	DHRS3, TBX3, SFRP2, SOX11, LOC100736872, SOX17, PLXND1	0.0643624
GO:0030155~regulation of cell adhesion	7	0.362506	ICAM1, CYTIP, S1PR1, JAG2, JAK2, CBLL1, FES	0.0643624
GO:0042110~T cell activation	5	0.258933	CD48, NCK1, SMAD3, AZI2, DLG1	0.0644982
GO:0070372~regulation of ERK1 and ERK2 cascade	5	0.258933	ERBB2, STYX, RRAS, EPHA2, CYR61	0.0644982
GO:0042787~protein ubiquitination involved in ubiquitin-dependent protein catabolic process	16	0.828586	DDB1, UBA6, CUL2, CUL5, ARIH2, RNF7, LOC106504088, BTBD1, KLHL25, KLHL28, WWP1, HECTD2, MDM2, RNF14, CUL1, RNF145	0.0650006
GO:0001570~vasculogenesis	9	0.46608	CAV1, AGGF1, ZMIZ1, TIPARP, ACKR3, TMEM100, SOX17, FZD4, EPHA2	0.0654591
GO:0001558~regulation of cell growth	8	0.414293	DDR1, SGK1, SOCS2, HTRA1, RB1, URI1, CYR61, IGFBP5	0.0658113
GO:0045444~fat cell differentiation	10	0.517866	SENP2, STEAP4, SMAD6, ARID5B, NOC3L, ADGRF5, NR4A3, PLCB1, TCF7L2, FBXO9	0.0726115
GO:0006446~regulation of translational initiation	6	0.31072	KLHL25, EIF4A2, EIF3E, EIF3J, EIF3M, CTIF	0.07323
GO:0030032~lamellipodium assembly	6	0.31072	S1PR1, NCK1, NUP85, RHOD, SH2B1, KIT	0.07323
GO:0009749~response to glucose	6	0.31072	GLUL, ACVR2B, PFKL, SIDT2, SESN2, THBS1	0.07323
GO:0008283~cell proliferation	18	0.93216	POLR3G, PDK1, COPS2, PAK1IP1, ENPEP, TCF7L2, APPL2, MRE11, TACC2, USP28, ANXA7, GLUL, H3F3A, WDR12, YME1L1, OCA2, CUL1, MYH10	0.0735886
GO:0009062~fatty acid catabolic process	3	0.15536	ECH1, FAAH, LPIN1	0.0758182
GO:0045722~positive regulation of gluconeogenesis	3	0.15536	PPP4R3B, PPARA, FOXO1	0.0758182
GO:0046321~positive regulation of fatty acid oxidation	3	0.15536	PPARA, NR4A3, PPARGC1A	0.0758182
GO:0043268~positive regulation of potassium ion transport	3	0.15536	KIF5B, FHL1, DLG1	0.0758182
GO:0034629~cellular protein complex localization	3	0.15536	SMAD7, WASL, DLG1	0.0758182
GO:0043535~regulation of blood vessel endothelial cell migration	3	0.15536	EFNA1, PRCP, EPHA2	0.0758182
GO:0071468~cellular response to acidic pH	3	0.15536	IMPACT, RAB11B, SLC9A1	0.0758182
GO:1903076~regulation of protein localization to plasma membrane	3	0.15536	STX7, VAMP8, VTI1B	0.0758182
GO:0051146~striated muscle cell differentiation	3	0.15536	MYOD1, KRAS, RB1	0.0758182
GO:0070072~vacuolar proton-transporting V-type ATPase complex assembly	3	0.15536	VMA21, ATP6V0A1, ATP6V0A2	0.0758182
GO:0006090~pyruvate metabolic process	3	0.15536	ME1, ME3, PC	0.0758182
GO:0071455~cellular response to hyperoxia	3	0.15536	CAV1, FOXO1, FAS	0.0758182
GO:0030838~positive regulation of actin filament polymerization	7	0.362506	PFN2, LOC100521443, KIRREL, TENM1, NCK1, BAIAP2, DLG1	0.0762919
GO:0001657~ureteric bud development	7	0.362506	FGFR1, SMAD7, SMAD6, ARG2, SMAD3, RARA, SIM1	0.0762919
GO:0010629~negative regulation of gene expression	13	0.673226	FLOT2, SOX11, TIPARP, FOXO1, NDFIP2, GJA1, ACACB, RNASEH2B, PARK7, TMF1, ANXA7, ACE, ID2	0.077711
GO:0032024~positive regulation of insulin secretion	5	0.258933	GCK, GLUD1, NNAT, PFKM, TCF7L2	0.0818658
GO:0006357~regulation of transcription from RNA polymerase II promoter	32	1.65717	DEAF1, LCORL, ARID4A, FOXO1, DEK, ELK3, TCF7L2, TCEAL1, TCF7L1, MAGED1, WDR75, BRD7, GLO1, SIM1, ETV4, SIM2, MAFF, ARID5B, TAF7, RB1, CDC5L, STAT1, LPIN1, UBP1, MED7, ATF4, MLX, LOC100523672, LOC100624071, MAMLD1, NFE2L3, LOC100156764	0.0836757
GO:0043065~positive regulation of apoptotic process	18	0.93216	ING3, COPS5, CLU, FOXO1, ZBTB16, ATF4, ITGA6, HOXA5, SFRP2, BNIP3L, MTCH1, DNAJA1, UBD, ABL1, BIN1, GADD45B, TOP2A, APC	0.0857824
GO:2000811~negative regulation of anoikis	4	0.207147	CAV1, ITGA5, PDK4, PIK3CA	0.0872063
GO:0060484~lung-associated mesenchyme development	4	0.207147	FGFR1, FGF9, HOXA5, PTK7	0.0872063
GO:0030239~myofibril assembly	4	0.207147	TMOD3, LMOD2, LMOD3, CAPN3	0.0872063
GO:0008156~negative regulation of DNA replication	4	0.207147	WAPL, TSPYL2, HUS1, TERF1	0.0872063
GO:0090201~negative regulation of release of cytochrome c from mitochondria	4	0.207147	LOC100523672, IGF1, HGF, HIGD1A	0.0872063
GO:1900087~positive regulation of G1/S transition of mitotic cell cycle	4	0.207147	DDX3X, ANXA1, RDX, PLCB1	0.0872063
GO:0030308~negative regulation of cell growth	14	0.725013	FOXK1, CRLF3, FHL1, BMPR2, OSGIN2, SMAD3, GJA1, NOV, TSPYL2, DDX3X, CDKN2C, SFRP2, SOX17, ENO1	0.0879264
GO:0008286~insulin receptor signaling pathway	8	0.414293	PHIP, CAV2, PDK2, BAIAP2, PDK4, FOXO1, SH2B2, ZNF106	0.0879808
GO:0043086~negative regulation of catalytic activity	6	0.31072	ANXA1, PPP1R10, ACACB, TIMP2, PPP1R14C, NQO1	0.0882235
GO:0043280~positive regulation of cysteine-type endopeptidase activity involved in apoptotic process	6	0.31072	PPM1F, HMGB1, TNFSF10, DDX3X, MYC, CYR61	0.0882235
GO:0007519~skeletal muscle tissue development	7	0.362506	HOXD9, MYOD1, CAV1, CFL2, LOC100736898, KLHL31, VGLL2	0.089383
GO:0006936~muscle contraction	7	0.362506	MYBPC2, STAC, TMOD3, MYOM1, LMOD2, LMOD3, TPM4	0.089383
GO:0021762~substantia nigra development	7	0.362506	RAD1, ZNF148, FGF9, CALM3, NDRG2, CALM2, CALM1	0.089383
GO:0035556~intracellular signal transduction	33	1.70896	PLEKHM1, STK17B, ASB11, RPS6KB1, KIT, PLCL1, LOC100526190, NOD1, STAC, PLCD3, GUCY1A3, SH2B2, SH2B1, TLK2, PLCB1, NIM1K, SGK1, SOCS2, SPSB2, PKN2, GUCY2C, LOC100624152, SRPK1, CCDC68, RPS6KA3, AIDA, PSEN2, LOC100739691, JAK2, ASB5, ASB7, ASB6, LCP2	0.0959936
GO:0006469~negative regulation of protein kinase activity	11	0.569653	PPM1F, CEP85, BGN, SOCS2, LRRTM3, TAF7, LRRC66, RB1, SOCS5, GADD45B, PARK7	0.0965257

## Sheet: C
GO analysis of differently expressed genes between LW1D and LW90D samples
Term	Count	%	Genes	P value
GO:0006412~translation	54	2.06264	RPL19, RPL14, RPL13, EIF5B, RPS27L, SLC25A20, SLC25A25, SLC25A24, RPS3A, SLC25A3, RPL11, SLC25A26, MRPL32, MRPL1, SLC25A4, RPS4X, MRPS2, RPS18, RPS19, MRPS18B, RPS16, RPS17, RPS12, RPS13, RPS11, SLC25A39, RPL27A, RPL38, RPL39, RPS26, RPL30, MRPL13, MRPL15, RPL34, MRPL17, RPL8, MRPL19, RPL5, RPL10A, RPL4, RSL24D1, RPS21, SLC25A40, RPS23, RPS9, RPL27, RPL24, RPS6, MRPL30, RPS8, SLC25A13, UCP3, RPL2…	2.82478e-07
GO:0006635~fatty acid beta-oxidation	13	0.496562	ACAA2, CPT1B, PPARD, ACADM, PEX5, ECHDC2, DECR1, SESN2, ACAT1, HADHA, HADHB, HADH, ACAA1	4.47451e-05
GO:0035914~skeletal muscle cell differentiation	14	0.534759	MYF6, COPS2, MAFF, SOX11, ANKRD2, LEMD2, FOXN2, ANKRD1, RB1, PLAGL1, MEF2D, ATF3, BTG2, BCL9L	7.12017e-05
GO:0006936~muscle contraction	14	0.534759	CLCN1, MYBPC2, MYBPC1, FKBP1A, ACTN2, TPM4, TPM3, STAC, TMOD4, SCN7A, CHRNB1, LMOD2, LMOD3, TMOD1	7.12017e-05
GO:0045214~sarcomere organization	11	0.420168	ACTG1, TCAP, MYPN, CFL2, LDB3, ACTN2, SIX4, SRF, CASQ1, CASQ2, FOXP1	8.41773e-05
GO:0045454~cell redox homeostasis	18	0.687548	GLRX3, TXNL1, PDIA3, AIFM1, TMX4, TMX3, PRDX4, PRDX2, PDIA5, TXNDC12, NNT, NXN, PRDX6, TXN, DLD, TXNRD1, NFE2L2, LOC100518656	0.00101366
GO:0072593~reactive oxygen species metabolic process	11	0.420168	NNT, CTGF, ND2, PDK4, PRDX4, ATPIF1, PLA2R1, SESN2, SESN1, NDUFS1, CYR61	0.00127336
GO:0009060~aerobic respiration	10	0.381971	SDHB, UQCR10, NDUFV1, LOC100524613, COX1, LOC100156879, CAT, LOC100514358, METTL17, SIRT3	0.00156075
GO:0001525~angiogenesis	28	1.06952	CAV1, LEPR, ATP5B, ENPEP, ELK3, PTEN, NOV, S1PR1, CTGF, ITGAV, ROBO4, PLCD1, CALCRL, TMEM100, ANGPTL4, RAMP2, EPAS1, ACKR3, MYH9, VASH1, ANXA2, GPI, SRPX2, PECAM1, LOC100736898, RBPJ, ENG, EIF2AK3	0.00173644
GO:0007015~actin filament organization	17	0.649351	ARHGEF2, INPPL1, FSCN1, PDLIM3, TMSB10, CTNNA1, TPM4, TPM3, RAC2, LOC100524867, KPTN, TMSB4X, TMOD4, WASL, LMOD2, LMOD3, TMOD1	0.0017582
GO:0060548~negative regulation of cell death	11	0.420168	NOV, TXNDC12, TMEM109, WNT16, NPAS2, CTGF, SOX11, IMPACT, DUS2, ZFPM2, CYR61	0.00282441
GO:0033539~fatty acid beta-oxidation using acyl-CoA dehydrogenase	9	0.343774	ACOX2, LOC100622764, ACADSB, ACADM, IVD, ACAD9, ACADL, ETFB, ETFA	0.00301093
GO:0045944~positive regulation of transcription from RNA polymerase II promoter	94	3.59053	NAMPT, ARID4A, ANKRD1, CNOT7, MED21, CBFA2T2, TGFB1, CTNNB1, KDM1A, MAMSTR, HSPH1, HSF1, ZNF148, PCBP1, GTF2A2, LOC100620926, CDK5RAP3, OGT, USP16, TOP2A, CHUK, CYR61, TBL1XR1, ARHGEF2, AR, MYO6, RARG, CD3D, CCNL1, NCOA7, CCNC, RB1, LPIN1, PPARGC1A, AHR, LPIN3, PRKD2, SS18, NCOA1, IGBP1, SIX1, RGCC, NFE2L1, ZFPM2, MOSPD1, CRLF3, LUM, CHCHD2, NFKBIA, NUFIP1, NFIX, FHL5, NR3C1, DCN, PAXBP1, PLAGL1,…	0.00311832
GO:0016567~protein ubiquitination	26	0.993125	SOCS2, SOCS7, ASB11, SOCS5, KLHL2, KLHL29, CDC42, NOSIP, KBTBD2, CRBN, KBTBD3, CUL9, KBTBD8, FBXL5, ASB1, KLHL31, UBD, KLHL24, CAND1, FBXO32, NFE2L2, ASB5, FBXO21, FBXO9, ASB7, FBXO7	0.00481784
GO:0001649~osteoblast differentiation	19	0.725745	ATP5B, MRC2, RBMX, TPM4, EPHA2, HNRNPU, FBL, LGR4, MEF2D, SFRP1, RSPO2, H3F3A, DDX21, CAT, MYBBP1A, RDH14, SPP1, ADAR, CYR61	0.00482626
GO:0055114~oxidation-reduction process	35	1.3369	ME1, LDHA, NDUFB6, GLUD1, KMO, PRDX2, GP91-PHOX, FAM213A, CAT, LOX, ENTPD1, GAPDH, ND6, ETFB, HSD17B8, SH3PXD2B, TXNL1, SH3PXD2A, MAOA, SCD, NDUFA6, ND3, F8, CYB5A, CYB561, DDO, AAED1, DHRS4, PRDX6, DLD, TXN, PHGDH, ALDH2, TXNRD1, DPYD	0.00672154
GO:0043065~positive regulation of apoptotic process	27	1.03132	ING2, GPLD1, ANKRD1, UTP11, CTNNB1, RACK1, MTCH2, HOXA5, DDX20, TOP2A, RARG, DFFA, FRZB, NCOA1, ATF4, ITGA6, RPS6KA2, SFRP2, PPID, BNIP3L, UBD, APBB2, GADD45B, BIN1, ABL1, MELK, NEURL1	0.00673744
GO:0035567~non-canonical Wnt signaling pathway	7	0.26738	FZD10, SFRP1, SFRP2, FRZB, FZD4, FZD7, FZD6	0.00711279
GO:0006120~mitochondrial electron transport, NADH to ubiquinone	7	0.26738	ND4, NDUFB8, NDUFB9, ND2, DLD, COQ9, NDUFA10	0.00711279
GO:0060213~positive regulation of nuclear-transcribed mRNA poly(A) tail shortening	6	0.229183	POLR2G, BTG2, CPEB3, CNOT1, PABPC1, CNOT7	0.0081524
GO:0006397~mRNA processing	11	0.420168	EIF4A3, RBFOX2, RBM23, AGGF1, RBM8A, ZRANB2, THOC7, PRKACA, RBM39, PTBP2, SMNDC1	0.013271
GO:0051259~protein oligomerization	10	0.381971	CAV2, AR, STX2, PFKL, CAMK2G, TEK, NPM1, NUFIP1, PFKM, SLC9A1	0.0136939
GO:0051091~positive regulation of sequence-specific DNA binding transcription factor activity	16	0.611154	MBTPS2, ARID5B, TRIM26, KIT, FZD4, PTEN, PPARGC1A, SRF, PLPP3, CTNNB1, KDM1A, EP300, PHB2, GTF2A2, RGCC, PPRC1	0.0137297
GO:0006122~mitochondrial electron transport, ubiquinol to cytochrome c	6	0.229183	UQCR10, LOC100524873, LOC100524613, CYCS, LOC100156879, LOC100514358	0.0141324
GO:0000045~autophagosome assembly	13	0.496562	GABARAPL2, ATG9A, BECN1, ATG14, WIPI2, UBQLN1, RAB1A, STX12, MAP1LC3A, MAP1LC3B, RB1CC1, LOC100737796, WDR45	0.0147923
GO:0016525~negative regulation of angiogenesis	12	0.458365	ROCK2, HOXA5, LOC100157336, TEK, TNMD, CX3CR1, RGCC, DCN, THBS1, THBS2, EPHA2, VASH1	0.0159644
GO:0006457~protein folding	24	0.91673	TXNL1, PDIA3, FKBP5, TMX4, TMX3, PPIL2, AARS, VBP1, MESDC2, PDIA5, CDC37, NKTR, CCT7, PPIF, PFDN4, TXN, CCT8, PPIL4, PPIL3, DNAJB1, DNAJB4, CDC37L1, DNAJC1, PPWD1	0.0163709
GO:0071456~cellular response to hypoxia	14	0.534759	SLC8A3, ACAA2, HYOU1, PPARD, SFRP1, EPAS1, RGCC, BNIP3L, NDRG1, FAM162A, MDM4, UBQLN1, PTEN, HIGD1A	0.0166683
GO:0000122~negative regulation of transcription from RNA polymerase II promoter	67	2.55921	BMI1, CPEB3, ANKRD2, CNOT2, ZEB2, CNOT1, CBX7, CTNNB1, KDM1A, EDNRB, RTF1, DDX20, E4F1, TBL1XR1, RARG, RREB1, SOX11, ZHX2, TLE4, MBD3, RB1, RBBP7, PKIA, ACVR2B, EP300, IGBP1, SIX1, TXN, MOSPD1, SEMA4D, MDM4, ZMYND11, CAV1, MTDH, USP2, ZNF366, NFIX, HIC1, REL, SQSTM1, GATAD2A, GATAD2B, PER3, ETV6, WDTC1, SMAD7, ZNF567, TAF7, LMCD1, RYBP, SNW1, NR4A3, LOC595122, FOXP1, HDAC2, PLK3, PHF14, DUSP26, P…	0.0169316
GO:0006006~glucose metabolic process	10	0.381971	GALM, WDTC1, APOD, INPPL1, PGM1, HK2, PIK3CA, PDHA1, GAPDH, OMA1	0.0179781
GO:0035264~multicellular organism growth	17	0.649351	TBL1XR1, AR, WDTC1, FKBP8, RARG, ARID5B, PDE4D, EN1, TNKS2, WDR48, CDC42, ATF5, ERCC6, SLC25A25, TMED2, HOXA5, H3F3A	0.0206869
GO:0008637~apoptotic mitochondrial changes	6	0.229183	PPIF, SLC25A4, PPP2CB, ATP2A1, HK2, NDUFS1	0.0224748
GO:0042692~muscle cell differentiation	6	0.229183	FBXO40, ANKRD2, H3F3A, ANKRD1, BIN1, IFRD1	0.0224748
GO:0055088~lipid homeostasis	10	0.381971	ACOX2, LOC100622764, ACADSB, ACADM, IVD, ACACA, ACAD9, ACADL, USF2, ETFA	0.0231587
GO:0035556~intracellular signal transduction	46	1.75707	LOC106504115, MKNK2, ASB11, DSTYK, KIT, AGTR2, STAC, SNRK, PLCD1, TLK1, SH2B1, PLCB1, STK38L, TEC, AKT2, PRKCA, ARHGEF3, SGK1, ARHGEF2, SOCS2, ARHGEF6, TGFBR1, SPSB2, WNK1, SOCS7, ARHGAP45, CCDC68, LOC100624152, WSB1, SS18, PDZD8, PSEN1, RPS6KA2, ARAF, PSEN2, POLR2M, ASB1, LOC100739691, JAK1, ASB3, JAK2, ASB5, ASB4, ASB7, MELK, LCP2	0.0240576
GO:0005977~glycogen metabolic process	7	0.26738	PPP1R3D, PPP1R3C, IL6ST, PHKA1, SLC37A4, PCDH12, UGP2	0.024847
GO:0051592~response to calcium ion	7	0.26738	TRPC1, CAV1, SEC31A, SLC25A13, ALG2, HOMER1, THBS1	0.024847
GO:0006446~regulation of translational initiation	8	0.305577	KLHL25, EIF3E, EIF5B, EIF3L, EIF1, GLE1, EIF2B2, EIF3M	0.0251913
GO:0015986~ATP synthesis coupled proton transport	8	0.305577	ATP5E, ATP5B, ATP5O, ATP5A1, ATP5G1, ATP5I, ATP5G3, ATP6V0A2	0.0251913
GO:0042771~intrinsic apoptotic signaling pathway in response to DNA damage by p53 class mediator	8	0.305577	USP28, TMEM109, EP300, LOC100157336, BCL3, RPS27L, SNW1, DYRK2	0.0251913
GO:0042149~cellular response to glucose starvation	8	0.305577	BECN1, IMPACT, ATG14, ASNS, NFE2L2, EIF2AK3, MYBBP1A, HIGD1A	0.0251913
GO:0050821~protein stabilization	21	0.802139	USP7, SMAD7, USP2, CREB1, IGF1, HCFC1, CCT2, PTEN, PLPP3, CDC37, CCT7, LAMP2, PFN2, STX12, EP300, MORC3, PHB2, CCT8, MDM4, CDC37L1, GAPDH	0.0265102
GO:0042327~positive regulation of phosphorylation	5	0.190985	AR, ITGA6, ILK, KCTD20, FZD7	0.0285288
GO:0043536~positive regulation of blood vessel endothelial cell migration	5	0.190985	PRKCA, PRKD2, AMOTL1, THBS1, TGFB1	0.0285288
GO:0045727~positive regulation of translation	10	0.381971	EIF6, ABCF1, EIF4A3, ERBB2, NPM1, FMR1, BCL3, RPS4X, THBS1, LARP4B	0.0293216
GO:0030433~ER-associated ubiquitin-dependent protein catabolic process	12	0.458365	TMEM129, PSMC6, DNAJB9, PSMC1, UBE2J1, UBXN8, UBQLN1, ANKZF1, EDEM2, ERLEC1, UBXN4, AUP1	0.0299844
GO:0007155~cell adhesion	30	1.14591	ITGAL, LOC106504114, SHAS2, POSTN, CLDN11, CTNNB1, NOV, AGGF1, CTGF, ITGAV, LOC106504078, CD2, AATF, THBS1, THBS2, THBS3, SPP1, CYR61, ICAM1, NECTIN3, CD63, TINAGL1, CERCAM, NCAM1, VWF, LYVE1, ITGA6, CX3CR1, ENG, ITGA2B	0.0312849
GO:0043491~protein kinase B signaling	9	0.343774	ILK, IGF1, PIK3CA, TMEM100, CCL5, SESN2, PTEN, TGFB1, EPHA2	0.0315755
GO:0045669~positive regulation of osteoblast differentiation	11	0.420168	ACVR2B, SFRP2, IL6ST, ATRAID, SOX11, ILK, IGF1, FBN2, BMPR1A, CYR61, CTNNB1	0.0331738
GO:0006096~glycolytic process	8	0.305577	GPI, HK3, HK2, ENO3, PGAM2, PGK1, GAPDH, ENO1	0.0334358
GO:2001234~negative regulation of apoptotic signaling pathway	6	0.229183	BMI1, ING2, IGBP1, CDK11B, MKL1, CTNNB1	0.0334476
GO:0000470~maturation of LSU-rRNA	7	0.26738	EIF6, MRPL1, RRP15, WDR12, RPL10A, RPF1, NSA2	0.0343928
GO:0050679~positive regulation of epithelial cell proliferation	10	0.381971	WDR48, BMI1, C5AR1, SFRP1, ERBB2, IGF1, NR4A3, CCL5, FOXP1, BMPR1A	0.0365443
GO:0030512~negative regulation of transforming growth factor beta receptor signaling pathway	10	0.381971	ASPN, RASL11B, CAV2, CAV1, SMAD7, ZNF451, PPM1A, CD109, BCL9L, HTRA3	0.0365443
GO:0045444~fat cell differentiation	13	0.496562	STEAP4, BBS7, ARID5B, TMEM120B, NOC3L, SOCS7, NR4A3, BBS2, ATF5, EP300, GRK5, PLCB1, FBXO9	0.0384729
GO:0014068~positive regulation of phosphatidylinositol 3-kinase signaling	12	0.458365	WNT16, PPARD, UNC5B, PDGFA, TEK, IGF1, DCN, HGF, CAT, SEMA4D, CCL5, KDR	0.0432058
GO:0001937~negative regulation of endothelial cell proliferation	8	0.305577	CAV2, CAV1, TNMD, RGCC, ATPIF1, ATP5A1, THBS1, VASH1	0.0432945
GO:0042407~cristae formation	5	0.190985	APOOL, IMMT, CHCHD3, OMA1, C2H19ORF70	0.0448299
GO:0080182~histone H3-K4 trimethylation	5	0.190985	TET3, ARID4A, RTF1, OGT, LOC595122	0.0448299
GO:0019432~triglyceride biosynthetic process	5	0.190985	GPAT4, GPAM, LPIN1, GPAT3, LPIN3	0.0448299
GO:0001558~regulation of cell growth	10	0.381971	DDR1, SGK1, SOCS2, CTGF, WFDC1, RB1, HTRA3, URI1, IGFBP4, CYR61	0.0448939
GO:0045892~negative regulation of transcription, DNA-templated	41	1.56608	DEAF1, COPS2, BCLAF1, ZBTB33, RSF1, ARID4A, FOXK1, HR, ELK3, CBFA2T2, LGR4, TGFB1, CTNNB1, SET, INPP5K, LOC100157336, WWP1, ATP8B1, BRD7, BCL3, PLCB1, KDM5B, ENO1, KHDRBS1, MYF6, NACC1, ZNF280D, CREBZF, ZNF24, CENPF, SIX4, RB1, ATXN1, CD38, ATF5, SFRP1, SFRP2, PHB2, YWHAQ, MAP3K10, MYBBP1A	0.046563
GO:0006888~ER to Golgi vesicle-mediated transport	14	0.534759	VTI1B, LMAN2, LMAN1, ERGIC1, RAB1A, COPB2, HYOU1, USO1, LOC100737796, GOSR1, TRAPPC1, SEC23B, SPAST, TRAPPC2	0.0468331
GO:0060070~canonical Wnt signaling pathway	16	0.611154	TBL1XR1, PTK7, FRZB, PTEN, FZD4, FZD7, PLPP3, FZD6, CTNNB1, CDC42, FZD10, PSEN1, SFRP1, SFRP2, BCL9L, EGF	0.0485215
GO:0006468~protein phosphorylation	20	0.763942	SRPK3, STK16, CSNK1A1, ROCK2, CREB1, PRKAG1, PHKA1, HUS1, WNK1, DSTYK, EIF2A, TGFB1, CDC25B, ST3GAL1, SNRK, HSF1, ARAF, PIK3CA, LOC100739691, PRKACA	0.0485631
GO:0006364~rRNA processing	10	0.381971	EIF4A3, IK, RPL26, UTP15, NPM3, RPL11, RRP9, UTP11, RPS6, DDX52	0.0544249
GO:0032868~response to insulin	8	0.305577	EIF6, SLC27A1, INPPL1, OGT, SESN2, CITED1, HADHA, SCAP	0.0548476
GO:0016055~Wnt signaling pathway	15	0.572956	CSNK1A1, LOC100620317, WNT16, WNT4, CSNK1G2, CCDC88C, DDB1, FERMT2, PPM1A, TLE4, STRN, TNKS, CSNK1G3, RNF146, CTNNB1	0.0549361
GO:0008283~cell proliferation	23	0.878533	POLR3G, PDK1, PTGES3, COPS2, PAK1IP1, PIM1, LIG4, ENPEP, APPL2, MRE11, USP28, KDM1A, GLUL, PPP1R8, SIX1, H3F3A, WDR12, CDK5RAP3, TXNRD1, MDM4, OCA2, CUL1, LOC100514009	0.0575834
GO:0007507~heart development	22	0.840336	SH3PXD2B, RAMP2, BBS7, RBM20, TGFBR1, PDLIM3, TAB2, EDNRA, MTHFD1, ACVR2B, EP300, CRKL, ADM, RPS6KA2, ROBO1, KCNJ8, RB1CC1, HOPX, ZFPM2, LOX, CALCRL, ADAM19	0.0586359
GO:0044387~negative regulation of protein kinase activity by regulation of protein phosphorylation	4	0.152788	DUSP26, NPM1, CDK5RAP3, ADAR	0.0590031
GO:0051893~regulation of focal adhesion assembly	4	0.152788	SLK, GPM6B, RHOD, EPHA3	0.0590031
GO:0048246~macrophage chemotaxis	4	0.152788	EDNRB, LGALS3, CX3CR1, NUP85	0.0590031
GO:2001214~positive regulation of vasculogenesis	4	0.152788	RAMP2, ADM, TMEM100, ASB4	0.0590031
GO:0010761~fibroblast migration	4	0.152788	NOV, LOC100157336, ARID5B, ILK	0.0590031
GO:0051694~pointed-end actin filament capping	4	0.152788	TMOD4, LMOD2, LMOD3, TMOD1	0.0590031
GO:0071560~cellular response to transforming growth factor beta stimulus	7	0.26738	STK16, CAV1, SFRP1, CLEC3B, PPM1A, ANKRD1, TGFB1	0.0597961
GO:0042787~protein ubiquitination involved in ubiquitin-dependent protein catabolic process	20	0.763942	RNF144B, DZIP3, UBE3B, LOC100518083, LOC100511906, DDB1, HACE1, MYLIP, LOC106504060, CUL5, CUL4A, BTBD1, RNF5, KLHL25, WWP1, BTBD2, HECTD2, CUL1, RNF146, HECTD1	0.0605275
GO:0000381~regulation of alternative mRNA splicing, via spliceosome	9	0.343774	EIF4A3, RBFOX2, RBM8A, MAGOH, FMR1, WTAP, SF3A1, RBMX, RBM25	0.0609797
GO:0051289~protein homotetramerization	9	0.343774	PCBD1, ACACA, RXRG, ATPIF1, ACTN2, CBR4, DECR1, CAT, USP16	0.0609797
GO:0007160~cell-matrix adhesion	13	0.496562	VCAM1, ITGAL, MKLN1, ITGA6, CTGF, ITGAV, ITGB6, BCAM, COL5A3, CD63, SRF, ITGA2B, CTNNB1	0.061425
GO:0006897~endocytosis	17	0.649351	SH3GL3, MYO6, CSNK1G2, RALBP1, BECN1, INPPL1, SNX1, ITSN2, RAB1A, CDC42, MIB1, PICALM, WIPF2, PSTPIP1, NECAP2, CSNK1G3, EHD1	0.0624588
GO:0043044~ATP-dependent chromatin remodeling	6	0.229183	ACTB, HDAC2, SMARCA5, GATAD2B, MBD3, SMARCA1	0.0638796
GO:0000460~maturation of 5.8S rRNA	6	0.229183	EIF6, RRP15, WDR12, SKIV2L2, RPF1, NSA2	0.0638796
GO:0050919~negative chemotaxis	6	0.229183	PLXNA3, PDGFA, SEMA3G, ITGAV, LOC100736872, SEMA4D	0.0638796
GO:0043484~regulation of RNA splicing	6	0.229183	AGGF1, HNRNPF, CLK4, RBM38, MBNL1, CLK1	0.0638796
GO:0008286~insulin receptor signaling pathway	10	0.381971	PHIP, CAV2, GSK3A, PDK4, GPLD1, SOCS7, LOC100511937, IRS1, PIK3R2, AKT2	0.0651781
GO:0043542~endothelial cell migration	5	0.190985	FAP, PECAM1, PLXND1, PTEN, DPP4	0.0652948
GO:0006744~ubiquinone biosynthetic process	5	0.190985	COQ4, COQ3, COQ9, COQ5, COQ6	0.0652948
GO:0030330~DNA damage response, signal transduction by p53 class mediator	5	0.190985	MYO6, BCL3, NDRG1, MDM4, SESN2	0.0652948
GO:0002504~antigen processing and presentation of peptide or polysaccharide antigen via MHC class II	5	0.190985	SLA-DMA, SLA-DQA1, SLA-DRB1, SLA-DRA, SLA-DMB	0.0652948
GO:0060444~branching involved in mammary gland duct morphogenesis	5	0.190985	DDR1, LOC100157336, KDM5B, EPHA2, ETV4	0.0652948
GO:0006885~regulation of pH	5	0.190985	EDNRB, RHCG, SLC9A2, PDK4, SLC9A1	0.0652948
GO:0009615~response to virus	11	0.420168	CCDC130, CREBZF, ACTA2, TBX21, BCL3, RSAD2, DDX21, STMN1, URI1, CCL5, ENO1	0.0679755
GO:0030199~collagen fibril organization	8	0.305577	FMOD, ADAMTS14, SFRP2, LUM, LOX, COL11A1, ANXA2, MMP11	0.0681444
GO:0042304~regulation of fatty acid biosynthetic process	3	0.114591	EIF6, PDK4, SCAP	0.0712385
GO:0044774~mitotic DNA integrity checkpoint	3	0.114591	TOP2B, TOP2A, LOC100514009	0.0712385
GO:0031340~positive regulation of vesicle fusion	3	0.114591	ANXA1, ANXA2, AKT2	0.0712385
GO:1902626~assembly of large subunit precursor of preribosome	3	0.114591	EIF6, RPL24, RSL24D1	0.0712385
GO:0042921~glucocorticoid receptor signaling pathway	3	0.114591	PTGES3, YWHAH, NR3C1	0.0712385
GO:0034446~substrate adhesion-dependent cell spreading	9	0.343774	ITGAV, TEK, ILK, FERMT2, ITGA4, LAMB1, ABL1, FZD4, FZD7	0.073643
GO:0009749~response to glucose	7	0.26738	GLUL, ACVR2B, PFKL, GPLD1, SESN2, THBS1, GPAM	0.0757676
GO:0042147~retrograde transport, endosome to Golgi	11	0.420168	RAB7A, DENND5A, GBF1, STX16, VTI1B, VPS35, DENND2A, GOSR1, STX10, VPS26A, RIC1	0.0793333
GO:0043161~proteasome-mediated ubiquitin-dependent protein catabolic process	21	0.802139	TBL1XR1, DZIP3, RAD23A, DDB1, UBE2H, RLIM, TRIM72, FBXL19, ATXN3, CRBN, PSMD12, CUL4A, BTBD1, GSK3A, LOC100157336, WWP1, BTBD2, PPP2CB, UBE2W, KLHL42, NFE2L2	0.080191
GO:0046777~protein autophosphorylation	21	0.802139	STK16, STK25, TRPM7, CAMK2G, ERBB2, STK26, PIM1, MKNK2, KIT, KDR, PRKD2, SLK, TEK, ULK3, CLK4, EEF2K, PRKACA, JAK2, GRK5, EIF2AK3, MELK	0.080191
GO:0030336~negative regulation of cell migration	12	0.458365	RECK, TMEFF2, RAP2C, NISCH, SFRP1, SFRP2, ABHD2, MIIP, SLC9A3R1, ARAP3, ENG, PTEN	0.080491
GO:0019915~lipid storage	8	0.305577	PLIN5, CAV1, GM2A, FITM1, HEXA, ABHD5, ABHD4, CIDEA	0.0832022
GO:0007266~Rho protein signal transduction	8	0.305577	RHOJ, AGTR1, CNKSR1, LOC100521443, HACD3, ROCK2, PECAM1, ARHGEF11	0.0832022
GO:0003151~outflow tract morphogenesis	8	0.305577	DHRS3, SFRP2, SOX11, ILK, SIX1, LOC100736872, PLXND1, RBPJ	0.0832022
GO:2000134~negative regulation of G1/S transition of mitotic cell cycle	6	0.229183	FHL1, PKD2, BRD7, RB1, PTEN, FBXO7	0.0833959
GO:0097009~energy homeostasis	5	0.190985	LEPR, PIK3CA, NR4A3, AMPD3, OMA1	0.0897634
GO:0060749~mammary gland alveolus development	5	0.190985	DDR1, AR, TNFRSF11A, HOXA5, PHB2	0.0897634
GO:0007062~sister chromatid cohesion	5	0.190985	PHB2, MCMBP, SMC5, STAG2, MRE11	0.0897634
GO:0033147~negative regulation of intracellular estrogen receptor signaling pathway	4	0.152788	PHB2, CNOT2, ZNF366, CNOT1	0.0909884
GO:0006002~fructose 6-phosphate metabolic process	4	0.152788	PFKL, GFPT1, FBP2, PFKM	0.0909884
GO:0033627~cell adhesion mediated by integrin	4	0.152788	NOV, ICAM1, ITGA6, ITGB6	0.0909884
GO:0055003~cardiac myofibril assembly	4	0.152788	ACTC1, TCAP, CSRP3, SRF	0.0909884
GO:0010608~posttranscriptional regulation of gene expression	4	0.152788	CAV1, ATG14, FBXO4, CDC37	0.0909884
GO:0016477~cell migration	21	0.802139	FUT8, CD248, FSCN1, PTK7, SIX2, ARPC5, ENPEP, CD63, TGFB1, RAB1A, HOXA5, CTGF, GSK3A, ITGAV, STRIP2, PSTPIP1, JAK2, TNK2, CSK, THBS1, PSTPIP2	0.0962458

## Sheet: D
GO analysis of differently expressed genes between LT90D and LW90D samples
Term	Count	%	Genes	P value
GO:0006412~translation	32	3.53201	RPL14, RPL13, RPL39, RPL30, MRPL13, SLC25A25, MRPL15, RPS3A, RPL34, MRPL17, MRPL19, RPL11, RPL5, RSL24D1, RPL10A, RPL4, RPS21, RPS23, MRPL1, RPL27, RPS9, RPL24, MRPL30, RPS6, MRPS2, RPS8, SLC25A13, RPS16, MRPS18B, RPS17, RPS13, RPS11	3.61138e-09
GO:0007569~cell aging	7	0.772627	NOX4, MORC3, ZMIZ1, NPM1, SOD1, DNAJA3, PRELP	4.36594e-05
GO:0006635~fatty acid beta-oxidation	8	0.883002	ACAA2, PPARD, ACADM, PEX2, PEX5, DECR1, SESN2, ACAT1	0.000164093
GO:0000470~maturation of LSU-rRNA	7	0.772627	RSL1D1, EIF6, MRPL1, RRP15, RPL10A, RPF1, NSA2	0.000175442
GO:0006120~mitochondrial electron transport, NADH to ubiquinone	6	0.662252	NDUFS6, ND4, NDUFB8, NDUFB9, ND2, COQ9	0.000355208
GO:0006457~protein folding	15	1.65563	TMX3, AARS, NKTR, PPIH, HSP90B1, CCT5, CCT8, TXN, PFDN4, HSPE1, PDRG1, CDC37L1, DNAJC1, DNAJA3, PPWD1	0.000604145
GO:0006364~rRNA processing	8	0.883002	EIF4A3, SBDS, RPL26, UTP15, RPL11, UTP11, RPS6, DDX52	0.00160682
GO:0001649~osteoblast differentiation	11	1.21413	RSL1D1, MEF2C, MEF2D, H3F3A, SYNCRIP, GJA1, DDX21, TPM4, LGR4, FBL, RDH14	0.00183873
GO:0035914~skeletal muscle cell differentiation	7	0.772627	MYF6, MEF2C, MEF2D, COPS2, ATF3, BTG2, ANKRD1	0.00307543
GO:0007519~skeletal muscle tissue development	7	0.772627	SRPK3, MEF2C, CAV1, MAPK14, SIX1, RHOA, LOC100736898	0.00307543
GO:0043524~negative regulation of neuron apoptotic process	11	1.21413	FAM134B, MEF2C, KRAS, SET, AARS, SIX1, RHOA, PIK3CA, CNTFR, LIG4, SOD1	0.00534373
GO:0001937~negative regulation of endothelial cell proliferation	6	0.662252	CAV2, CAV1, RGCC, ATPIF1, SYNJ2BP, THBS1	0.00591818
GO:0072593~reactive oxygen species metabolic process	6	0.662252	ND2, ATPIF1, SOD1, PLA2R1, SESN2, LRRK2	0.00730179
GO:0002181~cytoplasmic translation	6	0.662252	RPL31, EIF4H, RPL9, RPL7L1, RPL26, RPL29	0.00889583
GO:1902626~assembly of large subunit precursor of preribosome	3	0.331126	EIF6, RPL24, RSL24D1	0.00959288
GO:0042345~regulation of NF-kappaB import into nucleus	3	0.331126	LOC100523672, BCL3, PRDX1	0.00959288
GO:0045944~positive regulation of transcription from RNA polymerase II promoter	38	4.19426	MEF2C, MEF2B, NAMPT, COPS5, LUM, NUFIP1, CHCHD2, NFKBIA, FHL5, PAXBP1, ANKRD1, CNOT7, MED21, SUMO2, PCBP1, GTF2A2, BCL3, OGT, SLC30A9, SERTAD1, MYF6, TAF7, CCNL1, AHI1, CCNC, FAM58A, CSRP3, AHR, NRIP1, RPS6KA3, HDAC2, ITGA6, ZMIZ1, MAPK14, NCK1, SIX1, RGCC, PYGO1	0.0117297
GO:0007126~meiotic nuclear division	4	0.441501	TUBGCP3, TUBGCP5, MKI67, SMC3	0.0123639
GO:0051259~protein oligomerization	6	0.662252	CAV2, MLC1, NPM1, LOC100523672, NUFIP1, GRHPR	0.0127722
GO:0008217~regulation of blood pressure	6	0.662252	EDNRA, LNPEP, EDNRB, LVRN, SOD1, AGTRAP	0.0127722
GO:0016192~vesicle-mediated transport	10	1.10375	SFT2D1, MLC1, AP4E1, KXD1, NCK1, AHI1, VPS41, RAB10, CCZ1, SAR1A	0.0130351
GO:0033539~fatty acid beta-oxidation using acyl-CoA dehydrogenase	5	0.551876	ACOX2, ACADM, ACAD9, ACADL, ETFB	0.0143122
GO:0000027~ribosomal large subunit assembly	5	0.551876	RPL11, RPL24, RPL5, RSL24D1, RPF1	0.0143122
GO:0050821~protein stabilization	11	1.21413	USP7, LAMP2, CCT5, PFN2, STX12, MORC3, CREB1, CCT8, CDC37L1, PTEN, PLPP3	0.0150532
GO:0098779~mitophagy in response to mitochondrial depolarization	11	1.21413	PDK1, BECN1, NDUFB9, ATG14, MRPS10, PIK3CA, MSTN, ATPIF1, PEX13, LOC100518245, MRPS2	0.0177202
GO:0009615~response to virus	7	0.772627	MEF2C, CCT5, TBX21, BCL3, DDX21, URI1, CCL5	0.0181521
GO:0006887~exocytosis	7	0.772627	MYO5A, LIN7B, LIN7C, SCRN2, CCL5, YKT6, PRSS12	0.0181521
GO:0042149~cellular response to glucose starvation	5	0.551876	BECN1, ATG14, ASNS, NFE2L2, HIGD1A	0.0212748
GO:0006541~glutamine metabolic process	4	0.441501	ALDH5A1, LOC100513955, GLUD1, ASNS	0.0222775
GO:0032880~regulation of protein localization	6	0.662252	RSL1D1, RACK1, SWAP70, SIX1, WASL, PRNP	0.0236283
GO:0031122~cytoplasmic microtubule organization	5	0.551876	TUBGCP3, MAP10, TUBGCP5, SLK, SPAST	0.025411
GO:0055114~oxidation-reduction process	15	1.65563	ME1, NDUFB6, GLUD1, MAOA, ND3, CYB5A, SOD1, AAED1, FTH1, TXN, PHGDH, TXNRD1, DPYD, ND6, ETFB	0.0265766
GO:0008104~protein localization	6	0.662252	CAV1, KIF5B, ULK1, NPM1, MLH3, DHCR24	0.0270502
GO:0045663~positive regulation of myoblast differentiation	4	0.441501	MYF6, MEF2C, MAPK14, PLCB1	0.0284545
GO:0014842~regulation of skeletal muscle satellite cell proliferation	3	0.331126	PPARD, SIX1, PAXBP1	0.0295876
GO:0000165~MAPK cascade	6	0.662252	MEF2C, MEF2B, MEF2D, CAV1, CCR5, CCL5	0.0307719
GO:0010508~positive regulation of autophagy	5	0.551876	PLEKHF1, MTDH, BECN1, ATG14, LRRK2	0.0350411
GO:0002931~response to ischemia	4	0.441501	CAV1, FAM175B, LOC100523672, GJA1	0.0354406
GO:0035994~response to muscle stretch	3	0.331126	MAPK14, NFKBIA, ANKRD1	0.0427042
GO:1901409~positive regulation of phosphorylation of RNA polymerase II C-terminal domain	3	0.331126	CCNL1, CCNC, FAM58A	0.0427042
GO:0070262~peptidyl-serine dephosphorylation	3	0.331126	PPP2R1A, NCK1, PPP1R15B	0.0427042
GO:0071786~endoplasmic reticulum tubular network organization	3	0.331126	RAB18, KIAA1715, RAB10	0.0427042
GO:0000038~very long-chain fatty acid metabolic process	3	0.331126	PEX2, PEX5, ACOT4	0.0427042
GO:0042274~ribosomal small subunit biogenesis	3	0.331126	UTP11, RPS6, LTV1	0.0427042
GO:0008152~metabolic process	10	1.10375	DBT, MUT, ECH1, GALNS, LCLAT1, ISOC1, SUCLA2, ACSL3, ACSM5, SPAST	0.0431379
GO:0070536~protein K63-linked deubiquitination	4	0.441501	PSMD14, BRCC3, FAM175B, USP25	0.0432221
GO:0000460~maturation of 5.8S rRNA	4	0.441501	EIF6, RRP15, RPF1, NSA2	0.0432221
GO:0043491~protein kinase B signaling	5	0.551876	PIK3CA, RPS6KB1, CCL5, SESN2, PTEN	0.0465114
GO:0051592~response to calcium ion	4	0.441501	CAV1, SLC25A13, HOMER1, THBS1	0.0517784
GO:0045454~cell redox homeostasis	7	0.772627	TXNDC12, TXNDC15, TMX3, TXN, TXNRD1, NFE2L2, PRDX1	0.0564833
GO:0002098~tRNA wobble uridine modification	3	0.331126	ALKBH8, MOCS3, LOC100156764	0.0575382
GO:1903206~negative regulation of hydrogen peroxide-induced cell death	3	0.331126	TXN, NFE2L2, LRRK2	0.0575382
GO:0006006~glucose metabolic process	5	0.551876	APOD, ALDH5A1, MAPK14, PIK3CA, OMA1	0.0598211
GO:0031146~SCF-dependent proteasomal ubiquitin-dependent protein catabolic process	4	0.441501	RNF7, FBXL5, FBXO9, FBXL3	0.0610832
GO:0001731~formation of translation preinitiation complex	4	0.441501	EIF4H, EIF3E, DENR, EIF3M	0.0610832
GO:0006888~ER to Golgi vesicle-mediated transport	7	0.772627	USO1, LOC100737796, GOSR1, YKT6, SPAST, SEC23B, TRAPPC2	0.0613731
GO:0000462~maturation of SSU-rRNA from tricistronic rRNA transcript (SSU-rRNA, 5.8S rRNA, LSU-rRNA)	5	0.551876	DCAF13, RPS16, WDR3, LOC100738679, RPS8	0.0671547
GO:0006906~vesicle fusion	6	0.662252	CAV2, STX7, STX12, SYT12, GOSR1, YKT6	0.0718355
GO:0021795~cerebral cortex cell migration	3	0.331126	RHOA, PEX5, PEX13	0.0738483
GO:0006956~complement activation	3	0.331126	C4A, MASP1, RGCC	0.0738483
GO:0006123~mitochondrial electron transport, cytochrome c to oxygen	3	0.331126	CYCS, COX5B, COX8H	0.0738483
GO:0045727~positive regulation of translation	5	0.551876	EIF6, EIF4A3, NPM1, BCL3, THBS1	0.0749307
GO:0031663~lipopolysaccharide-mediated signaling pathway	4	0.441501	MTDH, MAPK14, NFKBIA, CCL5	0.0818108
GO:0017148~negative regulation of translation	5	0.551876	EIF4A3, BTG2, EPRS, SYNCRIP, SAMD4B	0.0831391
GO:0006397~mRNA processing	5	0.551876	EIF4A3, AGGF1, ZRANB2, THOC7, PRKACA	0.0831391
GO:0006979~response to oxidative stress	7	0.772627	STC2, LIAS, PRNP, NQO1, MSRB2, MSRB3, DHCR24	0.0833571
GO:0042493~response to drug	7	0.772627	CD38, SRP54, APOD, CREB1, RHOA, SOD1, THBS1	0.0894539
GO:0061136~regulation of proteasomal protein catabolic process	3	0.331126	PSMD14, PRKACA, TMF1	0.0914152
GO:0000042~protein targeting to Golgi	3	0.331126	GOLGA4, GCC2, RAB33B	0.0914152
GO:0006479~protein methylation	3	0.331126	BTG2, PCMT1, ETF1	0.0914152
GO:2001244~positive regulation of intrinsic apoptotic signaling pathway	4	0.441501	PLEKHF1, BCLAF1, CAV1, SLC9A3R1	0.0931613
GO:0018105~peptidyl-serine phosphorylation	9	0.993377	CSNK1A1, SGK1, MORC3, ULK1, MAPK14, MKNK2, PRKACA, CSNK1G3, LRRK2	0.0945922
GO:0071456~cellular response to hypoxia	6	0.662252	ACAA2, PPARD, RGCC, NDRG1, PTEN, HIGD1A	0.0999096

## Sheet: E
KEGG analysis of differently expressed genes between LT1D and LW1D samples
Term	Count	%	Genes	P value
ssc05205:Proteoglycans in cancer	50	1.88679	RPS6KB1, TLR4, SDC2, HOXD10, CTNNB1, CDC42, WNT4, RRAS, PIK3CA, PRKACA, FAS, GPC1, FRS2, MYC, AKT3, AKT2, PRKCA, LOC100152815, LOC100514498, ROCK2, PPP1CC, CTSV, CTSL, SDC1, VEGFA, MDM2, FGFR1, CAV2, CAV1, LUM, ERBB2, RDX, DCN, ITGB1, KRAS, ITGAV, CAMK2D, FZD9, ACTB, LOC100620317, IGF1, HGF, FZD4, FZD6, KDR, ITGA5, HBEGF, MTOR, PLAU, SLC9A1	2.15395e-05
ssc04931:Insulin resistance	34	1.28302	CRTC2, PPARA, SLC27A1, FOXO1, RPS6KB1, PTEN, LOC100152585, NR1H2, PPP1R3D, PPP1R3C, PPP1R3B, SLC2A4, PIK3CA, MLXIP, AKT3, AKT2, LOC100514498, CREB1, ACACB, PPP1R3A, PCK2, PPP1CC, IRS1, PPARGC1A, PPARGC1B, RPS6KA3, CD36, RPS6KA2, GFPT1, MAPK9, MAPK8, MTOR, PTPN1, SLC27A4	2.81899e-05
ssc04110:Cell cycle	34	1.28302	PRKDC, CHEK1, PTTG1, CDC16, RAD21, CDKN2C, BUB1, ORC4, MYC, STAG2, CUL1, BUB3, TFDP1, CDK1, ANAPC5, SKP2, SMAD3, SMAD2, ESPL1, CDK7, MCM2, RB1, ATR, CDC25C, MCM3, CDC27, WEE1, SMC3, CCNB1, CCNB2, HDAC2, EP300, YWHAQ, MDM2	5.08075e-05
ssc05200:Pathways in cancer	84	3.16981	PPARD, ADCY2, PDGFA, ADCY6, LPAR4, FOXO1, PTEN, CTNNB1, EDNRA, CDC42, AGTR1, CUL2, WNT4, PLCB4, CASP9, PIK3CA, GNG2, RARA, PRKACA, HHIP, FAS, TPR, PLCB1, MYC, CHUK, AKT3, AKT2, PRKCA, PTGER2, RET, HSP90AA1, CTBP2, LOC100514498, ROCK2, CYCS, SKP2, RB1, FGF21, RAD51, ARHGEF11, JUP, EP300, GNB2, NCOA4, VEGFA, MAPK9, MDM2, MAPK8, FGFR1, GNAI3, XIAP, APC2, GNAI1, ERBB2, GNG11, KIT, ZBTB16, ITGB1, TCF7…	5.89468e-05
ssc04910:Insulin signaling pathway	37	1.39623	EXOC7, PHKB, HK2, MKNK2, FOXO1, RPS6KB1, PPP1R3D, PPP1R3C, KRAS, PPP1R3B, SLC2A4, FASN, PIK3CA, SH2B2, PRKACA, RAPGEF1, AKT3, AKT2, SOCS2, LOC100514498, FLOT2, ACACB, PPP1R3A, FBP2, PPP1CC, PCK2, IRS1, PPARGC1A, RPTOR, EIF4E, GCK, RHEB, MAPK9, MAPK8, MTOR, PTPN1, CALM2	6.44404e-05
ssc04141:Protein processing in endoplasmic reticulum	42	1.58491	RAD23A, DNAJC10, UBQLN4, PDIA6, EDEM3, LMAN2, PDIA4, CALR, EDEM2, ERLEC1, NGLY1, PLAA, HSPH1, DNAJA1, DAD1, HSPA5, SAR1B, TRAM1, SAR1A, MAP2K7, HSPA8, CUL1, DNAJC1, SEC23A, HSP90AA1, MBTPS2, MAN1A2, RRBP1, HSP70.2, MAN1A1, CAPN1, HSPBP1, ATXN3, LOC100521136, RNF5, HSPA4L, MAPK9, MAPK8, DNAJB2, NFE2L2, DNAJB1, UGGT2	0.000100239
ssc05166:HTLV-I infection	58	2.18868	TSPO, ADCY2, PDGFA, SLA-DRA, ADCY6, CDC16, PTTG1, CTNNB1, WNT4, CDKN2C, RRAS, PIK3CA, PRKACA, MYC, AKT3, CHUK, AKT2, DLG1, ZFP36, ICAM1, LOC100514498, ANAPC5, SLA-DMB, RB1, EP300, MSX1, MAP3K14, CRTC2, APC2, XIAP, NFYB, CHEK1, TRRAP, CALR, SRF, VCAM1, SLA-DQA1, KRAS, MAP3K1, LOC100626904, VDAC1P5, BUB3, FZD9, DVL3, LOC100620317, KAT2B, CREB1, TGFBR1, SMAD3, SMAD2, ATR, FZD4, CDC27, FZD6, SLA-DQB1…	0.000162028
ssc04150:mTOR signaling pathway	20	0.754717	PRKCA, LOC100514498, IGF1, RPS6KB1, RICTOR, RRAGD, PTEN, IRS1, RPTOR, RRAGC, RPS6KA3, EIF4E, RPS6KA2, ULK2, RHEB, PIK3CA, CAB39, MTOR, AKT3, AKT2	0.000316816
ssc01100:Metabolic pathways	206	7.77358	SC5D, LDHA, SGMS1, OGDH, FAH, PRIM1, TPK1, LOC100526190, GOT1, AGPS, PIK3C3, NT5C2, PLD3, ACAA2, PLD1, C1GALT1C1, GATM, FAXDC2, UGCG, PLD4, LPCAT2, MGAT2, DLD, ACAA1, LOC100154792, ADSS, ACADSB, ENPP1, HMGCS1, ACAT1, ATP6V0C, ALDH4A1, IDH1, AMD1, GCNT1, FH, DNMT3A, ODC1, MOCS2, SPHK2, MAOA, ACER1, FAM213B, TKT, ACACB, PLA2G4A, ALG10, ALG11, ALG13, ANPEP, ASAH1, AUH, MTHFD1, ST6GALNAC4, AGPAT5, P4…	0.000468163
ssc04510:Focal adhesion	46	1.73585	CAV2, CAV1, XIAP, PDGFA, BCAR1, ERBB2, COL3A1, ITGB1, PTEN, VCL, CTNNB1, LOC100525960, CDC42, LOC100737105, ITGAV, ITGB6, COL6A3, COL6A2, PIK3CA, COL6A1, ZYX, LAMB1, RAPGEF1, THBS3, AKT3, AKT2, SPP1, ACTB, PRKCA, LOC100514498, ROCK2, IGF1, MRLC2, ITGA4, HGF, PPP1CC, COL5A1, KDR, VWF, ITGA6, ITGA5, FYN, ITGA8, VEGFA, MAPK9, MAPK8	0.000558484
ssc04914:Progesterone-mediated oocyte maturation	25	0.943396	CDK1, HSP90AA1, GNAI3, ADCY2, LOC100514498, ANAPC5, CPEB3, GNAI1, ADCY6, IGF1, CDC16, CDC25C, CDC27, CCNB1, RPS6KA3, KRAS, CCNB2, RPS6KA2, BUB1, MAPK9, PIK3CA, MAPK8, PRKACA, AKT3, AKT2	0.000972375
ssc04919:Thyroid hormone signaling pathway	30	1.13208	LOC100628075, ATP1B4, FOXO1, CTNNB1, WNT4, KRAS, PLCB4, CASP9, ITGAV, MED27, PIK3CA, PLCD1, PRKACA, PLCB1, MYC, AKT3, AKT2, ACTB, PRKCA, KAT2B, LOC100514498, ATP1A1, STAT1, EP300, HDAC2, NOTCH4, RHEB, MDM2, MTOR, SLC9A1	0.00109026
ssc05145:Toxoplasmosis	28	1.0566	GNAI3, XIAP, GNAI1, SLA-DRA, TLR4, ITGB1, IRAK4, SLA-DQA1, CASP9, IL10RA, LAMB1, HSPA8, CHUK, AKT3, AKT2, IRAK1, LY96, SLA-DMB, CYCS, HSP70.2, STAT1, SLA-DQB1, CCR5, ITGA6, JAK1, MAPK9, JAK2, MAPK8	0.00154677
ssc04152:AMPK signaling pathway	30	1.13208	CRTC2, PFKFB4, PFKFB3, PPP2R5A, FOXO1, RPS6KB1, CAMKK2, SLC2A4, PPP2CA, EEF2K, FASN, PIK3CA, CAB39, AKT3, AKT2, PFKL, LOC100514498, SCD, CREB1, IGF1, FBP2, PCK2, PPARGC1A, IRS1, RPTOR, CD36, ADRA1A, RHEB, MTOR, PPP2R2A	0.00194761
ssc05230:Central carbon metabolism in cancer	19	0.716981	PDK1, FGFR1, RET, LOC100514498, PFKL, ERBB2, HK2, KIT, PTEN, PDHB, SIRT3, SLC16A3, KRAS, GCK, PIK3CA, MTOR, MYC, AKT3, AKT2	0.0021829
ssc00280:Valine, leucine and isoleucine degradation	16	0.603774	ALDH6A1, ACAA2, ACADSB, ACADM, HMGCS1, LOC100516841, ACAT1, AUH, DBT, MUT, ALDH1B1, IVD, MCCC1, DLD, ALDH2, ACAA1	0.00226026
ssc03040:Spliceosome	32	1.20755	CWC15, U2SURP, SF3B6, SF3B4, SART1, SMNDC1, SF3B2, SF3B1, DDX46, PRPF8, PCBP1, CDC40, LSM5, MAGOHB, SNRNP70, HSPA8, RBM25, PRPF40A, RBM22, BCAS2, MAGOH, HSP70.2, SNW1, CDC5L, RBMX, LOC100515066, SRSF6, SLU7, THOC2, SNRPE, PRPF38B, THOC1	0.00234616
ssc05212:Pancreatic cancer	19	0.716981	LOC100514498, TGFBR1, ERBB2, SMAD3, SMAD2, RB1, STAT1, RAD51, CDC42, KRAS, CASP9, VEGFA, PIK3CA, JAK1, MAPK9, MAPK8, AKT3, CHUK, AKT2	0.00265342
ssc05221:Acute myeloid leukemia	17	0.641509	CEBPA, PPARD, LOC100514498, PIM1, RPS6KB1, ZBTB16, KIT, TCF7L2, JUP, KRAS, PIK3CA, RARA, MTOR, MYC, AKT3, CHUK, AKT2	0.00300683
ssc04310:Wnt signaling pathway	31	1.16981	PPARD, APC2, DAAM2, TCF7L2, CTNNB1, CSNK2A2, WNT4, PLCB4, CAMK2D, PRKACA, SOX17, PLCB1, MYC, CUL1, PRKCA, CSNK1A1, FZD9, TBL1XR1, LOC100620317, DVL3, CTBP2, ROCK2, LOC100523244, FZD4, FZD6, SENP2, EP300, PSEN1, MAPK9, MAPK8, LRP5	0.00317639
ssc04145:Phagosome	33	1.24528	DYNC1LI1, STX7, SLA-DRA, TLR4, ATP6V1B2, CALR, ITGB1, ATP6V0C, SLA-DQA1, STX12, ITGAV, TAP1, PIK3C3, SEC22B, PLA2R1, THBS3, MRC1, ACTB, NCF4, SLA-DMB, CTSV, ATP6V1C1, SLA-DQB1, CTSL, LAMP2, TUBA8, CD36, ITGA5, CD209, ATP6V0A1, TUBA4A, CD14, DYNC1I2	0.00645678
ssc04071:Sphingolipid signaling pathway	27	1.01887	GNAI3, GNAI1, SGPP1, PPP2R5A, SGMS1, PTEN, ASAH1, S1PR3, S1PR1, PLCB4, KRAS, PPP2CA, PIK3CA, PLCB1, AKT3, AKT2, PRKCA, PLD1, SPTLC1, SPHK2, LOC100514498, ROCK2, ACER1, FYN, MAPK9, MAPK8, PPP2R2A	0.00818694
ssc01130:Biosynthesis of antibiotics	41	1.54717	SC5D, LDHA, HK2, HMGCS1, OGDH, ACAT1, PDHB, GOT1, ATIC, IDH1, CAT, SUCLA2, FH, ACAA2, ODC1, ACADM, PFKL, FAXDC2, AK1, AK3, AK5, TKT, FBP2, PCK2, AMPD1, DBT, SDHB, CTH, GCK, ALDH1B1, SDHC, GFPT1, DLD, TGDS, PHGDH, ALDH2, PLA2G7, PCYOX1, PGK1, UGP2, ACAA1	0.00835548
ssc04520:Adherens junction	19	0.716981	ACTB, FGFR1, BAIAP2, ERBB2, TGFBR1, WASF2, CTNND1, SMAD3, SMAD2, NECTIN3, TCF7L2, VCL, CTNNB1, CSNK2A2, CDC42, EP300, FYN, WASL, PTPN1	0.0103308
ssc04115:p53 signaling pathway	19	0.716981	CDK1, CYCS, IGF1, CHEK1, ATR, CCNG1, SESN2, PTEN, SESN1, CCNG2, GTSE1, CCNB1, CCNB2, CASP9, CD82, SERPINE1, MDM2, FAS, MDM4	0.0119728
ssc00620:Pyruvate metabolism	12	0.45283	LDHA, ALDH1B1, DLD, ALDH2, GLO1, GRHPR, ACACB, PCK2, ACAT1, PDHB, FH, PC	0.0126061
ssc05164:Influenza A	36	1.35849	SLA-DRA, TLR3, RSAD2, TLR4, IL33, OAS2, CCL5, IRAK4, SLA-DQA1, CASP9, TICAM1, PIK3CA, FAS, MX1, MAP2K7, HSPA8, AKT3, AKT2, ACTB, ICAM1, LOC100514498, SLA-DMB, CYCS, HSP70.2, STAT1, SLA-DQB1, IRF9, TNFSF10, EP300, MAPK9, JAK1, MAPK8, JAK2, DNAJB1, KPNA2, KPNA1	0.0129114
ssc04068:FoxO signaling pathway	30	1.13208	FOXO1, CCNG2, PTEN, S1PR1, KRAS, SLC2A4, PIK3CA, BCL6, CAT, CHUK, AKT3, AKT2, GABARAPL2, LOC100514498, TGFBR1, SKP2, IGF1, SMAD3, SMAD2, LOC100523244, PCK2, IRS1, CCNB1, TNFSF10, CCNB2, PLK3, EP300, MDM2, MAPK9, MAPK8	0.0132237
ssc05210:Colorectal cancer	18	0.679245	MSH6, LOC100514498, APC2, MSH2, TGFBR1, CYCS, SMAD3, SMAD2, TCF7L2, CTNNB1, KRAS, CASP9, PIK3CA, MAPK9, MAPK8, MYC, AKT3, AKT2	0.0143608
ssc00330:Arginine and proline metabolism	13	0.490566	SAT1, ODC1, GOT1, SRM, GATM, P4HA2, ALDH1B1, MAOA, P4HA3, ALDH2, ALDH4A1, AMD1, CARNS1	0.0157774
ssc05215:Prostate cancer	21	0.792453	FGFR1, HSP90AA1, LOC100514498, PDGFA, CREB1, ERBB2, IGF1, FOXO1, RB1, PTEN, TCF7L2, CTNNB1, EP300, KRAS, CASP9, PIK3CA, MDM2, MTOR, AKT3, CHUK, AKT2	0.0163854
ssc05142:Chagas disease (American trypanosomiasis)	25	0.943396	GNAI3, GNAI1, TLR4, CALR, CCL5, IRAK4, PLCB4, PPP2CA, SERPINE1, TICAM1, PIK3CA, FAS, PLCB1, CHUK, AKT3, AKT2, IRAK1, LOC100514498, TGFBR1, SMAD3, SMAD2, C1QA, MAPK9, MAPK8, PPP2R2A	0.0164071
ssc04151:PI3K-Akt signaling pathway	62	2.33962	PDGFA, PPP2R5A, LPAR4, TLR4, RPS6KB1, PTEN, CASP9, IL4R, PIK3CA, GNG2, ANGPT2, MYC, AKT3, CHUK, AKT2, HSP90AA1, LOC100514498, PKN2, FGF21, IRS1, RPTOR, GNB2, VEGFA, MDM2, PPP2R2A, FGFR1, CRTC2, COL3A1, GNG11, KIT, ITGB1, CDC37, LOC100525960, KRAS, ITGAV, PPP2CA, ITGB6, TEK, COL6A3, COL6A2, COL6A1, LAMB1, THBS3, SPP1, CREB1, IGF1, HGF, ITGA4, PCK2, COL5A1, EPHA2, KDR, VWF, EIF4E, ITGA6, ITGA5, ITG…	0.0170945
ssc04550:Signaling pathways regulating pluripotency of stem cells	29	1.09434	FGFR1, APC2, IL6ST, ACVR1C, CTNNB1, WNT4, KRAS, PIK3CA, MYC, AKT3, AKT2, FZD9, LOC100620317, DVL3, LOC100514498, JARID2, LIFR, IGF1, SMAD3, SMAD2, FZD4, FZD6, ACVR2A, RIF1, JAK1, JAK2, ID4, ZFHX3, BMPR1A	0.0172814
ssc04261:Adrenergic signaling in cardiomyocytes	29	1.09434	GNAI3, ADCY2, PPP2R5A, GNAI1, TNNC1, ATP1B4, ADCY6, TPM4, AGTR1, ATP2B3, PLCB4, PPP2CA, CAMK2D, RAPGEF4, PRKACA, SCN7A, PLCB1, AKT3, AKT2, ACTC1, CREB1, CACNG6, ATP1A1, CACNG1, PPP1CC, ADRA1A, CALM2, SLC9A1, PPP2R2A	0.0172814
ssc04066:HIF-1 signaling pathway	23	0.867925	PDK1, PRKCA, LOC100514498, PFKFB3, ERBB2, HK2, MKNK2, IGF1, RPS6KB1, TLR4, PDHB, CUL2, EIF4E, EP300, TEK, SERPINE1, VEGFA, CAMK2D, PIK3CA, MTOR, ANGPT2, AKT3, AKT2	0.0185653
ssc05169:Epstein-Barr virus infection	26	0.981132	ICAM1, IRAK1, LOC100514498, VIM, SKP2, SNW1, RB1, PSMC6, HDAC2, PSMD12, CD58, MAPK9, MDM2, PSMD3, JAK1, PIK3CA, MAPK8, ENTPD1, MAP3K14, MYC, MAP2K7, CHUK, NCOR2, AKT3, TRAF3, AKT2	0.0190802
ssc04932:Non-alcoholic fatty liver disease (NAFLD)	34	1.28302	NDUFB3, PPARA, NDUFB5, NDUFB6, LOC100522678, COX5B, NDUFB1, NDUFS6, CDC42, UQCR10, NDUFS5, LOC100524239, PIK3CA, MLXIP, FAS, AKT3, AKT2, CEBPA, NDUFA4, LOC100514498, LOC100524613, CYCS, NDUFA13, IRS1, NDUFA1, NDUFA12, COX8H, COX6C, SDHB, GSK3A, SDHC, LOC100627009, MAPK9, MAPK8	0.0193811
ssc01200:Carbon metabolism	24	0.90566	ALDH6A1, ACADM, PFKL, HK2, ESD, TKT, FBP2, OGDH, CPS1, ACAT1, PDHB, SDHB, MUT, GOT1, GCK, SDHC, DLD, PHGDH, IDH1, CAT, SUCLA2, PGK1, FH, PC	0.0195153
ssc04390:Hippo signaling pathway	30	1.13208	APC2, LOC100738579, TCF7L2, CTNNB1, WNT4, FRMD6, CTGF, PPP2CA, SERPINE1, TEAD4, MYC, DLG1, ACTB, FZD9, LOC100620317, DVL3, TGFBR1, MPP5, SMAD3, SMAD2, LOC100523244, TEAD3, PPP1CC, FZD4, FZD6, YWHAQ, AMOT, PARD6G, BMPR1A, PPP2R2A	0.0195721
ssc04114:Oocyte meiosis	25	0.943396	CDK1, ADCY2, ANAPC5, CPEB3, PPP2R5A, ADCY6, IGF1, ESPL1, CDC16, PTTG1, CDC25C, PPP1CC, CDC27, SMC3, RPS6KA3, CCNB2, SLK, RPS6KA2, PPP2CA, CAMK2D, YWHAQ, BUB1, PRKACA, CALM2, CUL1	0.0203776
ssc00020:Citrate cycle (TCA cycle)	10	0.377358	SDHB, SDHC, DLD, IDH1, OGDH, SUCLA2, PCK2, PDHB, FH, PC	0.0217901
ssc04916:Melanogenesis	22	0.830189	FZD9, PRKCA, DVL3, LOC100620317, ADCY2, GNAI3, GNAI1, CREB1, ADCY6, KIT, FZD4, TCF7L2, FZD6, CTNNB1, WNT4, KRAS, EP300, PLCB4, CAMK2D, PRKACA, PLCB1, CALM2	0.0221349
ssc00190:Oxidative phosphorylation	29	1.09434	NDUFB3, NDUFB5, NDUFB6, LOC100522678, ATP6V1B2, COX5B, NDUFB1, ATP6V0C, NDUFS6, NDUFS5, UQCR10, LOC100524239, ATP5O, ATP5I, NDUFA4, ND1, LOC100524613, ND3, NDUFA13, LHPP, NDUFA1, NDUFA12, COX8H, COX6C, ATP6V1C1, SDHB, LOC100627009, SDHC, ATP6V0A1	0.0252704
ssc04710:Circadian rhythm	9	0.339623	CRY2, CREB1, PER1, LOC100523244, ARNTL, PER3, BHLHE41, FBXL3, CUL1	0.0257371
ssc04015:Rap1 signaling pathway	41	1.54717	FGFR1, GNAI3, ADCY2, PDGFA, GNAI1, BCAR1, ADCY6, LPAR4, CTNND1, KIT, ITGB1, CTNNB1, LOC100525960, CDC42, PFN2, KRAS, PLCB4, P2RY1, TEK, RRAS, PIK3CA, RAPGEF4, PLCB1, RAPGEF1, ANGPT2, AKT3, AKT2, PRKCA, ACTB, MAGI1, LOC100514498, IGF1, HGF, FGF21, EPHA2, KDR, PRKD2, VEGFA, PARD6G, CALM2, PRKD3	0.0278359
ssc00564:Glycerophospholipid metabolism	20	0.754717	PLD3, ACHE, PLD1, LPGAT1, PLD4, LYPLA1, LPCAT2, LPIN1, GPAT3, PLPP3, GPD1L, PLA2G4A, LOC100526190, AGPAT5, PLA2G12A, MBOAT1, LCLAT1, PHOSPHO1, LOC100154792, AGPAT1	0.0351807
ssc05012:Parkinson's disease	31	1.16981	NDUFB3, NDUFB5, GNAI3, NDUFB6, GNAI1, LOC100522678, COX5B, NDUFB1, NDUFS6, NDUFS5, UQCR10, CASP9, LOC100524239, VDAC1P5, PRKACA, ATP5O, NDUFA4, ND1, LOC100524613, ND3, CYCS, NDUFA13, NDUFA1, NDUFA12, COX8H, COX6C, SDHB, UBA1, SDHC, LOC100627009, LRRK2	0.0365131
ssc04120:Ubiquitin mediated proteolysis	28	1.0566	XIAP, LOC100511906, CDC16, LOC100620112, CUL2, ERCC8, CUL5, KLHL9, MAP3K1, FBXO4, CUL1, ANAPC5, SKP2, LOC100155280, UBE2Q2, UBE2C, CDC27, TRIM37, UBE2N, UBE2O, LOC100521136, RNF7, HUWE1, UBA1, UBA3, UBE2W, MDM2, PIAS1	0.0419427
ssc05168:Herpes simplex infection	36	1.35849	SLA-DRA, TLR3, HCFC1, HCFC2, OAS2, CCL5, CSNK2A2, SLA-DQA1, TAP1, TICAM1, PER1, PER3, FAS, CHUK, CUL1, TRAF3, CDK1, TAF3, TAF4B, CYCS, SLA-DMB, SKP2, ARNTL, PPP1CC, STAT1, SRPK1, SLA-DQB1, IRF9, EP300, GTF2I, SRSF6, MAPK9, LOC100624071, JAK1, MAPK8, JAK2	0.042802
ssc04330:Notch signaling pathway	12	0.45283	DVL3, KAT2B, EP300, HDAC2, CIR1, CTBP2, PSEN1, PSEN2, NOTCH4, JAG2, SNW1, NCOR2	0.0440192
ssc04728:Dopaminergic synapse	25	0.943396	GNAI3, GNAI1, PPP2R5A, GNG11, COMT, PLCB4, PPP2CA, CAMK2D, PRKACA, GNG2, PLCB1, AKT3, AKT2, PRKCA, KIF5B, CREB1, MAOA, ARNTL, PPP1CC, GNB2, GSK3A, MAPK9, MAPK8, CALM2, PPP2R2A	0.0481277
ssc04922:Glucagon signaling pathway	21	0.792453	PPP4R3B, CRTC2, PPARA, LDHA, ADCY2, PHKB, CREB1, FOXO1, ACACB, PCK2, PPARGC1A, PDHB, EP300, PLCB4, GCK, CAMK2D, PRKACA, PLCB1, AKT3, CALM2, AKT2	0.0493082
ssc05133:Pertussis	17	0.641509	IRAK1, GNAI3, C4A, LY96, GNAI1, TLR4, ITGB1, C1QA, IRAK4, NOD1, ITGA5, CFL2, TICAM1, MAPK9, MAPK8, CD14, CALM2	0.0537256
ssc00970:Aminoacyl-tRNA biosynthesis	12	0.45283	IARS, WARS, CARS, DARS, RARS, SARS, AARS, GARS, WARS2, FARSA, LARS2, MTFMT	0.0586237
ssc05231:Choline metabolism in cancer	21	0.792453	PRKCA, SLC44A1, PLD1, LOC100514498, PDGFA, WASF2, LYPLA1, RPS6KB1, PLPP3, PLA2G4A, LOC100526190, KRAS, RHEB, PIK3CA, MAPK9, SLC22A3, MAPK8, MTOR, WASL, AKT3, AKT2	0.0594147
ssc04670:Leukocyte transendothelial migration	24	0.90566	ACTB, PRKCA, LOC100152815, ICAM1, GNAI3, LOC100514498, GNAI1, ROCK2, BCAR1, NCF4, CTNND1, MRLC2, CLDN11, ITGA4, ITGB1, VCL, CTNNB1, VCAM1, CDC42, LOC100737105, PECAM1, PIK3CA, ESAM, RAPGEF4	0.0613576
ssc04512:ECM-receptor interaction	18	0.679245	COL3A1, ITGA4, ITGB1, COL5A1, VWF, SDC1, CD36, ITGA6, ITGA5, ITGA8, ITGAV, ITGB6, COL6A3, COL6A2, COL6A1, LAMB1, THBS3, SPP1	0.0678516
ssc04725:Cholinergic synapse	23	0.867925	PRKCA, ACHE, ADCY2, GNAI3, LOC100514498, GNAI1, CREB1, ADCY6, GNG11, KCNQ5, KCNQ4, KRAS, PLCB4, GNB2, FYN, CAMK2D, PIK3CA, JAK2, GNG2, PRKACA, PLCB1, AKT3, AKT2	0.0718115
ssc03008:Ribosome biogenesis in eukaryotes	18	0.679245	RPP38, UTP4, UTP15, BMS1, FBL, PWP2, CSNK2A2, WDR75, RCL1, SBDS, WDR36, LSG1, POP4, UTP14A, WDR43, XRN1, SPATA5, XRN2	0.0746241
ssc04146:Peroxisome	18	0.679245	ACOX2, ACOX1, ABCD1, EPHX2, PEX5, PEX5L, FAR2, DHRS4, PEX1, PEX19, AGPS, IDH1, PEX13, CAT, ACSL4, CROT, ACAA1, SLC25A17	0.0746241
ssc04666:Fc gamma R-mediated phagocytosis	18	0.679245	PRKCA, PTPRC, PLD1, LOC100514498, SPHK2, WASF2, RPS6KB1, ARPC5, PLPP3, CDC42, MYO10, ARPC3, LOC100737105, CFL2, PIK3CA, WASL, AKT3, AKT2	0.0746241
ssc00270:Cysteine and methionine metabolism	10	0.377358	DNMT3A, LDHA, CTH, GOT1, MAT2A, SRM, MAT2B, AHCYL1, AMD1, CDO1	0.0754851
ssc04611:Platelet activation	26	0.981132	ADCY2, GNAI3, GNAI1, COL3A1, ADCY6, ITGB1, BTK, PLCB4, P2RY1, PIK3CA, GUCY1A3, PRKACA, PLCB1, AKT3, AKT2, ACTB, LOC100514498, ROCK2, STIM1, MRLC2, PPP1CC, COL5A1, VWF, PLA2G4A, VAMP8, FYN	0.0775851
ssc04722:Neurotrophin signaling pathway	24	0.90566	IRAK1, LOC100514498, IRS1, MAGED1, IRAK4, CDC42, RPS6KA3, KRAS, PSEN1, RPS6KA2, MAP3K1, PSEN2, CAMK2D, PIK3CA, MAPK9, SH2B2, MAPK8, SH2B1, MAP2K7, RAPGEF1, FRS2, AKT3, CALM2, AKT2	0.0778202
ssc04920:Adipocytokine signaling pathway	16	0.603774	PPARA, ACACB, PCK2, PPARGC1A, IRS1, CAMKK2, CD36, SLC2A4, MAPK9, MAPK8, JAK2, MTOR, ACSL4, AKT3, CHUK, AKT2	0.0790069
ssc00565:Ether lipid metabolism	11	0.415094	PLD3, PLD1, PLA2G4A, AGPS, PLA2G12A, PLD4, PLA2G7, TMEM86B, LPCAT2, PLPP3, LOC100154792	0.0813869
ssc05414:Dilated cardiomyopathy	18	0.679245	ACTB, ACTC1, ADCY2, TNNC1, ADCY6, CACNG6, IGF1, ITGA4, CACNG1, ITGB1, TPM4, ITGA6, ITGA5, ITGA8, ITGAV, ITGB6, PRKACA, SGCB	0.0818307
ssc05152:Tuberculosis	33	1.24528	SLA-DRA, NFYB, TLR4, ATP6V0C, IRAK4, SLA-DQA1, CASP9, IL10RA, PIK3C3, CAMK2D, PLA2R1, AKT3, AKT2, MRC1, IRAK1, SPHK2, CREB1, SLA-DMB, CYCS, STAT1, SLA-DQB1, LAMP2, PLK3, EP300, CD209, ATP6V0A1, MAPK9, JAK1, MAPK8, JAK2, KSR1, CD14, CALM2	0.0841109
ssc04612:Antigen processing and presentation	15	0.566038	HSP90AA1, SLA-DRA, CREB1, SLA-DMB, IFI30, HSP70.2, NFYB, CALR, CTSV, B2M, SLA-DQB1, SLA-DQA1, CTSL, TAP1, HSPA8	0.0853267
ssc05213:Endometrial cancer	12	0.45283	KRAS, CASP9, APC2, LOC100514498, ERBB2, PIK3CA, TCF7L2, MYC, PTEN, AKT3, CTNNB1, AKT2	0.0859624
ssc05010:Alzheimer's disease	33	1.24528	NDUFB3, NDUFB5, NDUFB6, LOC100522678, MME, COX5B, NDUFB1, NDUFS6, UQCR10, NDUFS5, PLCB4, CASP9, LOC100524239, ATP5O, FAS, PLCB1, NDUFA4, ADAM10, LOC100524613, CYCS, NDUFA13, NDUFA1, NDUFA12, COX8H, CAPN1, COX6C, SDHB, PSEN1, SDHC, LOC100627009, PSEN2, ATP2A1, CALM2	0.0893537
ssc05214:Glioma	14	0.528302	PRKCA, LOC100514498, PDGFA, IGF1, RB1, PTEN, KRAS, CAMK2D, MDM2, PIK3CA, MTOR, AKT3, CALM2, AKT2	0.0922098
ssc03320:PPAR signaling pathway	15	0.566038	ACOX2, ACOX1, SLC27A1, PPARA, PPARD, ACADM, SCD, ACADL, PCK2, CD36, UBC, ACSL4, SLC27A4, ACAA1, ANGPTL4	0.0942599
ssc00520:Amino sugar and nucleotide sugar metabolism	12	0.45283	GCK, GNPDA2, HEXA, GNPNAT1, GFPT1, CMAH, NPL, UGDH, HK2, LOC100737254, FPGT, UGP2	0.0965639
ssc00410:beta-Alanine metabolism	8	0.301887	ALDH6A1, ACADM, SRM, ALDH1B1, ALDH2, DPYD, LOC100520329, CARNS1	0.0977588

## Sheet: F
KEGG analysis of differently expressed genes between LT1D and LT90D samples
Term	Count	%	Genes	P value
ssc04922:Glucagon signaling pathway	26	1.34645	PPP4R3B, CRTC2, PPARA, CPT1B, LDHA, PHKB, PHKG1, CREB1, CAMK2G, PRKAB2, PHKA1, FOXO1, PGAM2, ACACB, PPARGC1A, PDHB, PKM, ATF4, PYGM, GCK, CAMK2D, CALM3, PRKACA, PLCB1, CALM2, CALM1	2.00279e-05
ssc01130:Biosynthesis of antibiotics	41	2.12325	SC5D, LDHA, BCAT2, HMGCS1, PGAM2, ASL, PDHB, HADHA, PKM, LOC100625138, ARG2, IDH2, ENO3, IDH1, RPIA, SUCLA2, GAPDH, GCDH, ODC1, PFKL, AK1, TKT, ACLY, PFKM, FBP2, AMPD1, GPI, DBT, CTH, GCK, SQLE, ALDH1B1, GFPT1, PGM1, DLD, ALDH2, PLA2G7, PCYOX1, PGK1, IDI1, PCCB	3.29414e-05
ssc01200:Carbon metabolism	26	1.34645	ME1, ME3, GLUD1, ESD, PGAM2, PDHB, HADHA, PKM, MUT, IDH2, ENO3, IDH1, RPIA, SUCLA2, GAPDH, ALDH6A1, PFKL, TKT, FBP2, PFKM, GPI, GCK, DLD, PGK1, PCCB, PC	8.63578e-05
ssc01100:Metabolic pathways	165	8.5448	LDHA, SC5D, CNDP2, LOC100518224, PGAM2, GPAT3, UXS1, PDHB, TPK1, ST3GAL1, LOC100526190, AGPS, PHOSPHO2, SPR, ENOPH1, LOC100515269, ALDH6A1, SPTLC1, PLD4, LOC100516841, FBP2, LPCAT2, CDO1, CHPT1, COX6C, GLUL, CHPF, LOC100524934, DLD, PGM1, LCLAT1, PCCB, NMNAT1, LOC100154792, ME1, ADSS, ACADSB, ME3, GCLC, GLUD1, NT5C1A, HMGCS1, KMO, CERS4, ATP6V1B2, ASL, HADHA, CMPK1, CMPK2, ATP6V0C, LOC100625138, …	0.000129866
ssc01230:Biosynthesis of amino acids	18	0.93216	BCAT2, PFKL, MAT2A, PGAM2, TKT, PFKM, ASL, PKM, CTH, GLUL, ARG2, IDH2, ENO3, IDH1, RPIA, PGK1, GAPDH, PC	0.000198149
ssc04152:AMPK signaling pathway	27	1.39824	CRTC2, PPP2R5B, PPP2R5A, PFKFB3, FOXO1, RPS6KB1, FOXO3, CAMKK1, EEF2K, FASN, RAB11B, PIK3CA, CPT1B, PFKL, LOC100514498, CREB1, SCD, PRKAB2, ADIPOR2, IGF1, FBP2, PFKM, PPARGC1A, RHEB, RAB10, LIPE, PPP2R2A	0.000292799
ssc04910:Insulin signaling pathway	29	1.50181	PHKB, PHKA1, FOXO1, RPS6KB1, PPP1R3D, KRAS, FASN, PIK3CA, SH2B2, PRKACA, LOC100514498, SOCS2, PHKG1, FLOT2, PRKAB2, PPP1R3A, FBP2, ACACB, PPP1CC, PPARGC1A, EIF4E, GCK, PYGM, CALM3, RHEB, MAPK8, LIPE, CALM2, CALM1	0.000345329
ssc00280:Valine, leucine and isoleucine degradation	15	0.7768	ALDH6A1, ACADSB, BCAT2, LOC100518224, HMGCS1, LOC100516841, HADHA, DBT, MUT, ALDH1B1, IVD, MCCC1, DLD, ALDH2, PCCB	0.000429438
ssc00010:Glycolysis / Gluconeogenesis	16	0.828586	LDHA, PFKL, PGAM2, PFKM, FBP2, PDHB, PKM, GPI, GCK, ALDH1B1, PGM1, DLD, ALDH2, ENO3, PGK1, GAPDH	0.000598946
ssc05230:Central carbon metabolism in cancer	17	0.880373	PDK1, EGFR, FGFR1, RET, LOC100514498, PFKL, ERBB2, PGAM2, PFKM, KIT, PTEN, PDHB, PKM, KRAS, GCK, PIK3CA, MYC	0.000775164
ssc05205:Proteoglycans in cancer	36	1.86432	CAV2, FGFR1, CAV1, LUM, ERBB2, CAMK2G, RDX, RPS6KB1, SDC2, KRAS, ANK1, ITGAV, CAMK2D, PIK3CA, RRAS, PRKACA, FAS, PAK1, THBS1, MYC, EGFR, FZD9, LOC100620317, LOC100514498, IGF1, HGF, PPP1CC, CD63, FZD4, KDR, PTPN11, FZD6, FZD10, ITGA5, MDM2, SLC9A1	0.00127034
ssc00620:Pyruvate metabolism	12	0.62144	PKM, ME1, ME3, LDHA, ALDH1B1, LDHD, DLD, ALDH2, GLO1, ACACB, PDHB, PC	0.00147221
ssc04510:Focal adhesion	35	1.81253	CAV2, CAV1, BCAR1, ERBB2, LOC100622859, MYL10, PTEN, LOC100525960, LOC100513005, RAC2, LOC100737105, ITGAV, COL6A2, PIK3CA, COL6A1, ZYX, PAK1, EGF, THBS1, COL11A1, THBS2, THBS3, EGFR, PARVG, LOC100514498, MYLK4, IGF1, HGF, PPP1CC, KDR, ITGA6, ITGA5, ITGA8, COL1A2, MAPK8	0.00319097
ssc05166:HTLV-I infection	42	2.17504	CRTC2, ITGAL, ADCY1, TSPO, SLA-DRA, ADCY6, SLA-DQA1, KRAS, CDKN2C, MAP3K1, RRAS, PIK3CA, NFATC4, PRKACA, MYC, FOSL1, APC, DLG1, ZFP36, SLA-DMA, FZD9, ICAM1, LOC100620317, KAT2B, IL2RA, LOC100514498, ANAPC5, SLC25A5, CREB1, SLA-DOA, MAP2K4, SLA-DMB, SMAD3, POLB, RB1, ATR, FZD4, FZD6, SLA-DQB1, FZD10, ATF4, ATF3	0.00424486
ssc04931:Insulin resistance	23	1.19109	CRTC2, PPARA, CPT1B, LOC100514498, CREB1, PRKAB2, FOXO1, RPS6KB1, ACACB, PPP1R3A, PPP1CC, PTEN, PPARGC1A, PPARGC1B, PTPN11, PPP1R3D, RPS6KA3, PYGM, GFPT1, MLX, PIK3CA, MAPK8, SLC27A4	0.00438264
ssc03040:Spliceosome	25	1.29467	CWC15, U2SURP, SF3B4, SART1, SMNDC1, HNRNPA3, PCBP1, CDC40, LSM5, MAGOHB, PRPF40A, BCAS2, SNRPA1, MAGOH, HSP70.2, CDC5L, LOC100515066, SRSF3, PPIH, SRSF6, SLU7, SNRPF, SNRNP27, SNRPE, PRPF38B	0.00614737
ssc01212:Fatty acid metabolism	12	0.62144	CPT1B, ACADSB, CPT2, ACSL1, ELOVL5, FADS1, SCD, FASN, FADS2, ACADL, ACSL3, HADHA	0.00775546
ssc05168:Herpes simplex infection	32	1.65717	SLA-DRA, TAF9B, TLR3, HCFC1, HCFC2, OAS2, CCL5, SLA-DQA1, TAP1, PER1, FAS, PER3, CUL1, TRAF3, SLA-DMA, SLA-DOA, TAF4B, SLA-DMB, SKP2, STAT1, PPP1CC, SRPK1, PTPN11, SRSF3, SLA-DQB1, IRF9, SRSF6, LOC100624071, JAK2, MAPK8, EEF1D, CLOCK	0.00783754
ssc04151:PI3K-Akt signaling pathway	51	2.64112	HSP90AB1, PPP2R5B, FGF9, EFNA1, PPP2R5A, FGF13, RPS6KB1, FOXO3, PTEN, LOC100513005, IL4R, PIK3CA, ANGPT2, MYC, COL11A1, EGFR, SGK1, HSP90AA1, LOC100514498, PKN2, FGF21, COL1A2, MDM2, PPP2R2A, FGFR1, CRTC2, GNG11, KIT, LOC100525960, KRAS, ITGAV, TEK, COL6A2, COL6A1, EGF, THBS1, THBS2, THBS3, IL2RA, CREB1, IGF1, HGF, EPHA2, KDR, ATF4, EIF4E, ITGA6, ITGA5, ITGA8, RHEB, JAK2	0.00792883
ssc05150:Staphylococcus aureus infection	12	0.62144	SLA-DMA, SLA-DQB1, C1QA, ICAM1, SLA-DQA1, ITGAL, C3AR1, C4A, MASP1, SLA-DRA, SLA-DOA, SLA-DMB	0.00921341
ssc00071:Fatty acid degradation	11	0.569653	GCDH, CPT1B, ECI2, ACADSB, CPT2, ACSL1, ALDH1B1, ALDH2, ACADL, ACSL3, HADHA	0.00926703
ssc05200:Pathways in cancer	58	3.00363	HSP90AB1, PPARD, ADCY1, FGF9, ADCY6, FOXO1, FGF13, PTEN, EDNRA, CUL2, PIK3CA, RARA, PRKACA, FAS, TPR, PLCB1, MYC, EGFR, PTGER2, RET, HSP90AA1, LOC100514498, RXRG, SKP2, FGF21, RB1, RAD51, MDM2, MAPK8, FGFR1, LOC100622859, ERBB2, EGLN3, GNG11, KIT, ZBTB16, TCF7L2, TCF7L1, LOC100525960, KRAS, RAC2, ITGAV, EGF, APC, TRAF3, FZD9, LOC100620317, MSH2, IGF1, SMAD3, HGF, STAT1, FZD4, FZD6, FZD10, HDAC2, …	0.00935886
ssc05215:Prostate cancer	18	0.93216	EGFR, HSP90AB1, FGFR1, HSP90AA1, LOC100514498, CREB1, ERBB2, IGF1, FOXO1, RB1, PTEN, TCF7L2, TCF7L1, ATF4, KRAS, PIK3CA, MDM2, EGF	0.00958852
ssc04916:Melanogenesis	19	0.983946	FZD9, LOC100620317, ADCY1, CREB1, CAMK2G, ADCY6, KIT, TCF7L2, FZD4, TCF7L1, FZD6, FZD10, KRAS, CAMK2D, CALM3, PRKACA, PLCB1, CALM2, CALM1	0.0109981
ssc03320:PPAR signaling pathway	15	0.7768	ACOX2, CPT1B, PPARA, PPARD, CPT2, SCD, RXRG, FADS2, AQP7, ACADL, ACSL1, UBC, ACSL3, SLC27A4, ANGPTL4	0.0122451
ssc04810:Regulation of actin cytoskeleton	33	1.70896	ITGAL, FGFR1, FGF9, BCAR1, FGF13, MYL10, RDX, ARPC5, PFN2, KRAS, RAC2, LOC100737105, ITGAV, PIK3CA, RRAS, PAK1, EGF, APC, EGFR, LOC100514498, LIMK1, BAIAP2, MYLK4, FGF21, PPP1CC, ITGA6, ITGA5, ARPC5L, ITGA8, CFL2, TMSB4X, WASL, SLC9A1	0.0128753
ssc04261:Adrenergic signaling in cardiomyocytes	24	1.24288	ADCY1, ACTC1, CACNA2D1, PPP2R5B, MYL3, PPP2R5A, CAMK2G, CREB1, ADCY6, PPP1CC, CACNG1, TPM1, TPM4, ATP2B3, ATF4, CAMK2D, CALM3, SCN4B, PRKACA, PLCB1, CALM2, SLC9A1, CALM1, PPP2R2A	0.0131623
ssc05214:Glioma	14	0.725013	EGFR, LOC100514498, CAMK2G, IGF1, RB1, PTEN, KRAS, CAMK2D, CALM3, MDM2, PIK3CA, EGF, CALM2, CALM1	0.0131659
ssc03022:Basal transcription factors	11	0.569653	GTF2E2, GTF2A1, CCNH, TAF8, TAF4B, TAF7, GTF2A2, TAF9B, LOC100624071, GTF2H5, GTF2H1	0.0131687
ssc05213:Endometrial cancer	12	0.62144	EGFR, KRAS, LOC100514498, ERBB2, PIK3CA, FOXO3, EGF, TCF7L2, MYC, PTEN, TCF7L1, APC	0.0148721
ssc04015:Rap1 signaling pathway	34	1.76075	ITGAL, FGFR1, ADCY1, EFNA1, FGF9, BCAR1, ADCY6, FGF13, KIT, LOC100525960, PFN2, KRAS, RAC2, TEK, P2RY1, PIK3CA, RAPGEF5, RRAS, EGF, THBS1, PLCB1, ANGPT2, EGFR, LOC100514498, IGF1, HGF, FGF21, EPHA2, KDR, PRKD2, CALM3, CALM2, CALM1, LCP2	0.0152716
ssc04066:HIF-1 signaling pathway	19	0.983946	EGFR, PDK1, LOC100514498, PFKFB3, CAMK2G, ERBB2, EGLN3, IGF1, RPS6KB1, PDHB, CUL2, EIF4E, TEK, CAMK2D, ENO3, PIK3CA, EGF, ANGPT2, GAPDH	0.016742
ssc04310:Wnt signaling pathway	23	1.19109	FZD9, LOC100620317, PPARD, CAMK2G, FZD4, TCF7L2, TCF7L1, FZD6, SENP2, FZD10, RAC2, SFRP2, CAMK2D, PRKACA, NFATC4, MAPK8, SOX17, PLCB1, FOSL1, MYC, CUL1, LRP5, APC	0.0174536
ssc04014:Ras signaling pathway	35	1.81253	FGFR1, FGF9, EFNA1, FGF13, GNG11, KIT, LOC100525960, KRAS, RAC2, LOC100515414, PLA2G12A, TEK, PIK3CA, RAPGEF5, RRAS, PRKACA, PAK1, EGF, ANGPT2, EGFR, PLA2G16, LOC100514498, IGF1, HGF, FGF21, EPHA2, LOC100624152, KDR, PTPN11, CALM3, MAPK8, KSR1, ABL1, CALM2, CALM1	0.0229828
ssc04114:Oocyte meiosis	20	1.03573	ADCY1, ANAPC5, PPP2R5B, CPEB3, PPP2R5A, CAMK2G, ADCY6, IGF1, CDC25C, PPP1CC, SMC3, RPS6KA3, CCNB2, SLK, CAMK2D, CALM3, PRKACA, CUL1, CALM2, CALM1	0.0263639
ssc00030:Pentose phosphate pathway	7	0.362506	GPI, PFKL, PGM1, TKT, RPIA, FBP2, PFKM	0.0270543
ssc04915:Estrogen signaling pathway	18	0.93216	EGFR, HSP90AB1, ADCY1, HSP90AA1, LOC100514498, FKBP5, FKBP4, CREB1, ADCY6, HSP70.2, ATF4, KRAS, CALM3, PIK3CA, PRKACA, PLCB1, CALM2, CALM1	0.0300278
ssc04146:Peroxisome	16	0.828586	ACOX2, ECI2, ECH1, ABCD1, DECR2, PEX5, PEX5L, FAR2, ACSL1, PEX1, AGPS, IDH2, IDH1, PEX13, ACSL3, CROT	0.0308648
ssc05218:Melanoma	14	0.725013	EGFR, FGFR1, LOC100514498, FGF9, IGF1, FGF13, FGF21, HGF, RB1, PTEN, KRAS, MDM2, PIK3CA, EGF	0.0309075
ssc05414:Dilated cardiomyopathy	16	0.828586	ADCY1, CACNA2D1, ACTC1, MYL3, ADCY6, IGF1, CACNG1, TPM1, TPM4, DES, ITGA6, ITGA5, ITGAV, ITGA8, PRKACA, SGCB	0.0340195
ssc04145:Phagosome	24	1.24288	SLA-DMA, DYNC1LI1, STX7, SLA-DRA, SLA-DOA, SLA-DMB, ATP6V1B2, ATP6V0C, SLA-DQB1, SLA-DQA1, LOC100513005, LAMP2, STX12, ITGA5, ITGAV, TAP1, TUBA4A, SEC22B, ATP6V0A1, PLA2R1, THBS1, THBS2, THBS3, DYNC1I2	0.0368857
ssc05410:Hypertrophic cardiomyopathy (HCM)	15	0.7768	CACNA2D1, ACTC1, MYL3, PRKAB2, IGF1, CACNG1, TPM1, TPM4, ACE, DES, ITGA6, ITGA5, ITGAV, ITGA8, SGCB	0.0417716
ssc04550:Signaling pathways regulating pluripotency of stem cells	22	1.13931	FZD9, LOC100620317, FGFR1, LOC100514498, TBX3, IL6ST, BMPR2, IGF1, SMAD3, FZD4, FZD6, ACVR2B, FZD10, KRAS, RIF1, ID2, PIK3CA, JAK2, ZFHX3, MYC, APC, BMPR1A	0.0429225
ssc04110:Cell cycle	20	1.03573	ANAPC5, CCNH, SKP2, SMAD3, ATR, MCM2, RB1, CDC25C, MCM3, SMC3, RAD21, HDAC2, CCNB2, CDKN2C, MDM2, ABL1, GADD45B, MYC, CUL1, TFDP1	0.0430324
ssc00270:Cysteine and methionine metabolism	9	0.46608	ADI1, DNMT3A, LDHA, CTH, MAT2A, AHCYL1, ENOPH1, AMD1, CDO1	0.0432609
ssc00640:Propanoate metabolism	7	0.362506	ALDH6A1, LDHA, MUT, ACACB, SUCLA2, PCCB, HADHA	0.0484922
ssc01040:Biosynthesis of unsaturated fatty acids	6	0.31072	ELOVL5, FADS1, SCD, FADS2, ACOT4, HADHA	0.0489452
ssc04612:Antigen processing and presentation	13	0.673226	SLA-DMA, SLA-DQB1, HSP90AB1, SLA-DQA1, HSP90AA1, SLA-DRA, CREB1, SLA-DOA, TAP1, SLA-DMB, IFI30, HSP70.2, B2M	0.0521779
ssc04068:FoxO signaling pathway	22	1.13931	EGFR, GABARAPL2, SGK1, LOC100514498, PRKAB2, SKP2, IGF1, FOXO1, SMAD3, FOXO3, HOMER1, PTEN, TNFSF10, S1PR1, KRAS, CCNB2, PIK3CA, MDM2, FBXO32, MAPK8, GADD45B, EGF	0.0529046
ssc04710:Circadian rhythm	7	0.362506	CREB1, PRKAB2, PER1, PER3, FBXL3, CLOCK, CUL1	0.0574395
ssc05216:Thyroid cancer	7	0.362506	RET, KRAS, RXRG, TPR, TCF7L2, MYC, TCF7L1	0.0574395
ssc04924:Renin secretion	13	0.673226	PTGER2, CREB1, ADCY6, EDNRA, ACE, AGT, PDE1A, CALM3, GUCY1A3, PRKACA, PLCB1, CALM2, CALM1	0.0575273
ssc05164:Influenza A	26	1.34645	SLA-DRA, TLR3, RSAD2, OAS2, IVNS1ABP, CCL5, SLA-DQA1, PIK3CA, FAS, MX1, SLA-DMA, ICAM1, LOC100514498, SLA-DOA, MAP2K4, SLA-DMB, HSP70.2, STAT1, IRF9, SLA-DQB1, TNFSF10, JAK2, MAPK8, DNAJB1, KPNA1, ADAR	0.0635764
ssc05221:Acute myeloid leukemia	11	0.569653	PPARD, KRAS, LOC100514498, PIK3CA, RARA, RPS6KB1, ZBTB16, KIT, TCF7L2, MYC, TCF7L1	0.0653063
ssc05416:Viral myocarditis	12	0.62144	SLA-DMA, SLA-DQB1, ICAM1, SLA-DQA1, ITGAL, CAV1, RAC2, SLA-DRA, SLA-DOA, SLA-DMB, ABL1, SGCB	0.071037
ssc04012:ErbB signaling pathway	15	0.7768	EGFR, KRAS, LOC100514498, ERBB2, CAMK2G, NCK1, MAP2K4, CAMK2D, PIK3CA, MAPK8, RPS6KB1, PAK1, EGF, ABL1, MYC	0.0765371
ssc04912:GnRH signaling pathway	15	0.7768	EGFR, ADCY1, CAMK2G, ADCY6, MAP2K4, ATF4, KRAS, MAP3K1, CAMK2D, CALM3, PRKACA, MAPK8, PLCB1, CALM2, CALM1	0.0765371
ssc05212:Pancreatic cancer	12	0.62144	EGFR, KRAS, LOC100514498, RAC2, ERBB2, SMAD3, PIK3CA, MAPK8, RB1, STAT1, EGF, RAD51	0.077987
ssc04920:Adipocytokine signaling pathway	13	0.673226	PPARA, CPT1B, ACSL1, PRKAB2, RXRG, ADIPOR2, JAK2, MAPK8, ACACB, ACSL3, PPARGC1A, CAMKK1, PTPN11	0.0825263
ssc00564:Glycerophospholipid metabolism	15	0.7768	GPD2, GPD1, ACHE, PLA2G16, PLD4, LPCAT2, LPIN1, GPAT3, CHPT1, GPD1L, LOC100526190, PLA2G12A, PEMT, LCLAT1, LOC100154792	0.082692
ssc04914:Progesterone-mediated oocyte maturation	15	0.7768	HSP90AB1, ADCY1, HSP90AA1, ANAPC5, LOC100514498, CPEB3, ADCY6, IGF1, CDC25C, RPS6KA3, KRAS, CCNB2, PIK3CA, PRKACA, MAPK8	0.0891546
ssc04722:Neurotrophin signaling pathway	19	0.983946	LOC100514498, CAMK2G, FOXO3, PTPN11, MAGED1, RPS6KA3, ATF4, KRAS, MAP3K1, PSEN2, CAMK2D, CALM3, PIK3CA, SH2B2, MAPK8, SH2B1, ABL1, CALM2, CALM1	0.0902175
ssc00330:Arginine and proline metabolism	9	0.46608	ODC1, ALDH1B1, CNDP2, ARG2, P4HA3, ALDH2, ALDH4A1, AMD1, CARNS1	0.0914213
ssc04130:SNARE interactions in vesicular transport	8	0.414293	STX7, STX2, VAMP8, VAMP7, SEC22B, VAMP4, VTI1B, GOSR1	0.0916154
ssc00250:Alanine, aspartate and glutamate metabolism	8	0.414293	ADSS, GLUL, GFPT1, GLUD1, ALDH4A1, ASNS, ASL, RIMKLA	0.0916154
ssc05310:Asthma	6	0.31072	SLA-DMA, SLA-DQB1, SLA-DQA1, SLA-DRA, SLA-DOA, SLA-DMB	0.0987639

## Sheet: G
KEGG analysis of differently expressed genes between LW1D and LW90D samples
Term	Count	%	Genes	P value
ssc05012:Parkinson's disease	60	2.29183	ATP5E, SNCAIP, ATP5B, NDUFAB1, COX5B, NDUFS7, NDUFS5, UQCR10, LOC100624067, ATP5O, PRKACA, NDUFS2, NDUFS1, ND1, ND4, SLC25A4, LOC100524873, ND2, CYCS, ND3, UBE2J1, NDUFA13, NDUFA10, NDUFA12, COX6B, COX6C, NDUFA11, NDUFB3, NDUFB5, NDUFB6, GNAI3, NDUFB7, NDUFB8, GNAI1, LOC100522678, LOC100156879, ATP5G1, ATP5G3, LOC100524239, VDAC1P5, ND6, NDUFA4, NDUFA2, NDUFA3, COX7A2, NDUFA8, NDUFA9, LOC10052461…	2.84788e-13
ssc00190:Oxidative phosphorylation	54	2.06264	ATP5E, ATP5B, NDUFAB1, COX5B, NDUFS7, UQCR10, LOC100624067, NDUFS5, LOC100156375, ATP5O, ATP5I, NDUFS2, NDUFS1, ND1, ND4, LOC100524873, ND2, ND3, NDUFA13, NDUFA10, COX6B, NDUFA12, COX6C, NDUFA11, ATP6V1C1, NDUFB3, NDUFB5, NDUFB6, NDUFB7, NDUFB8, LOC100522678, LOC100156879, ATP5G1, ATP5G3, ATP6V0C, LOC100524239, ND6, NDUFA4, NDUFA2, NDUFA3, COX7A2, NDUFA8, NDUFA9, NDUFA6, LOC100524613, NDUFA1, COX…	3.68401e-12
ssc04932:Non-alcoholic fatty liver disease (NAFLD)	57	2.17723	PRKAG1, LEPR, NDUFAB1, COX5B, TGFB1, NDUFS7, CDC42, UQCR10, LOC100624067, NDUFS5, PIK3CA, FAS, NDUFS2, AKT3, NDUFS1, AKT2, LOC100524873, CYCS, NDUFA13, NDUFA10, IRS1, COX6B, NDUFA12, COX6C, NDUFA11, MAPK8, EIF2AK3, NDUFB3, NDUFB5, NDUFB6, NDUFB7, NDUFB8, LOC100522678, LOC100156879, LOC100524239, MLXIP, PIK3R2, NDUFA4, NDUFA2, NDUFA3, COX7A2, NDUFA8, NDUFA9, NDUFA6, LOC100524613, NDUFA1, COX8H, SD…	2.61805e-10
ssc03010:Ribosome	51	1.94805	RPL19, RPL14, RPL13, RPLP2, RPS27L, RPS3A, RPL11, MRPL32, MRPL1, RPS4X, MRPS2, RPS18, RPS19, RPS16, MRPS18A, RPS17, RPS12, RPS13, RPS10, RPS11, MRPS10, RPL27A, RPL38, RPL39, RPS26, RPL30, MRPL13, MRPL15, RPL31, RPL9, RPL34, MRPL17, RPL8, MRPL19, RPL5, RPL10A, RPL4, RSL24D1, RPS21, RPS23, RPL26, RPS9, RPL27, RPL24, RPS6, MRPL30, RPS8, RPL29, MRPL22, MRPL28, RPL21	1.91444e-09
ssc01100:Metabolic pathways	236	9.01451	LDHA, B3GALT4, PGAM2, LOC100624067, GOT1, AGPS, NT5C2, PDHA1, ACAA2, C1GALT1C1, GATM, CYP1A1, UGCG, PLD4, GLCE, MGAT2, CD38, GLUL, NNT, DLD, PGM1, ACAA1, ADSS, ACADSB, AHCY, ENPP1, ASL, ACAT1, HADHA, HADHB, ATP6V0C, LOC100625138, THTPA, IDH2, ALDH4A1, LOC100737059, MOCS1, UAP1, MOCS2, SPHK2, MAOA, ACACA, DLAT, COX1, ALG10, LOC100524308, ALG13, ATP5E, ATP5B, PMVK, ASAH1, AUH, PKM, MTHFD1, ST6GALNA…	1.81655e-07
ssc05010:Alzheimer's disease	54	2.06264	ATP5E, ATP5B, NDUFAB1, COX5B, NDUFS7, UQCR10, LOC100624067, NDUFS5, ATP5O, FAS, PLCB1, NDUFS2, NDUFS1, LOC100524873, CYCS, NDUFA13, NDUFA10, COX6B, NDUFA12, COX6C, NDUFA11, PSEN1, PSEN2, EIF2AK3, NDUFB3, NDUFB5, NDUFB6, NDUFB7, NDUFB8, LOC100522678, LOC100156879, ATP5G1, ATP5G3, LOC100524239, GAPDH, NDUFA4, NDUFA2, NDUFA3, COX7A2, NDUFA8, NDUFA9, NDUFA6, LOC100524613, NDUFA1, COX8H, SDHB, LOC1006…	2.15706e-07
ssc05016:Huntington's disease	58	2.21543	ATP5E, ATP5B, NDUFAB1, COX5B, NDUFS7, UQCR10, LOC100624067, NDUFS5, ATP5O, PLCB1, NDUFS2, NDUFS1, SLC25A4, LOC100524873, CYCS, NDUFA13, NDUFA10, PPARGC1A, COX6B, NDUFA12, COX6C, NDUFA11, EP300, NDUFB3, POLR2G, NDUFB5, NDUFB6, NDUFB7, NDUFB8, LOC100522678, LOC100156879, ATP5G1, ATP5G3, LOC100524239, VDAC1P5, NDUFA4, NDUFA2, NDUFA3, COX7A2, NDUFA8, NDUFA9, HTT, NDUFA6, CREB1, LOC100524613, VDAC2, N…	6.01163e-07
ssc00010:Glycolysis / Gluconeogenesis	22	0.840336	MINPP1, LDHA, PFKL, ADPGK, HK2, PGAM2, PFKM, FBP2, DLAT, ACSS2, PDHB, PKM, GPI, GALM, HK3, PGM1, DLD, ALDH2, ENO3, PDHA1, PGK1, GAPDH	2.44794e-05
ssc01200:Carbon metabolism	33	1.2605	ME1, ME3, ADPGK, GLUD1, HK2, ESD, PGAM2, ACSS2, ACAT1, PDHB, HADHA, PKM, GOT1, HK3, IDH2, ENO3, CAT, PDHA1, SUCLA2, GAPDH, ALDH6A1, ACADM, PFKL, IDH3B, PFKM, FBP2, DLAT, GPI, SDHB, SDHC, DLD, PHGDH, PGK1	3.12954e-05
ssc01212:Fatty acid metabolism	19	0.725745	CPT1B, ACAA2, ACADSB, CPT2, ACADM, HACD3, SCD, ACACA, ACADL, ACAT1, HADHA, HADHB, ACSL1, ELOVL5, FASN, ACSL4, HADH, ACSL3, ACAA1	4.48503e-05
ssc01130:Biosynthesis of antibiotics	50	1.90985	LDHA, PGAM2, ACSS2, PDHB, FNTB, PKM, GOT1, CAT, PDHA1, SUCLA2, HADH, ACAA2, ACADM, PFKL, PFKM, FBP2, PGM1, DLD, PLA2G7, UGP2, ACAA1, ADPGK, HK2, ASL, ACAT1, HADHA, HADHB, LOC100625138, GALM, ATIC, HK3, IDH2, ENO3, GAPDH, UAP1, AK1, AK3, IDH3B, AK5, DLAT, AMPD3, AMPD1, SDHB, DBT, GPI, SDHC, GFPT1, PHGDH, ALDH2, PGK1	9.13482e-05
ssc05205:Proteoglycans in cancer	49	1.87166	CAV2, WNT16, CAV1, ERBB2, LUM, CAMK2G, PPP1R12C, DCN, TGFB1, CTNNB1, ACTG1, CDC42, WNT4, ANK1, KRAS, ANK3, ITGAV, SOS2, PIK3CA, PRKACA, FAS, THBS1, FRS2, AKT3, PIK3R2, AKT2, ACTB, LOC100152815, PRKCA, LOC100620317, ROCK2, MAP2K2, IGF1, HGF, FLNC, RPS6, CD63, FZD4, CTSV, FZD7, KDR, FZD6, CTSL, FZD10, ARAF, PLCG2, HBEGF, LOC100511937, SLC9A1	0.0001606
ssc05230:Central carbon metabolism in cancer	22	0.840336	PDK1, RET, PFKL, MAP2K2, ERBB2, HK2, PGAM2, KIT, PFKM, PTEN, PDHB, SIRT3, SLC16A3, PKM, KRAS, HK3, PIK3CA, LOC100511937, PDHA1, AKT3, AKT2, PIK3R2	0.000185455
ssc04510:Focal adhesion	49	1.87166	CAV2, CAV1, PDGFA, ERBB2, PPP1R12C, MYL10, PTEN, CTNNB1, ACTG1, LOC100525960, CDC42, LOC100513005, RAC2, ITGAV, SOS2, ILK, ITGB6, PIK3CA, THBS1, EGF, LAMB1, COL11A1, RAPGEF1, THBS2, THBS3, AKT3, AKT2, SPP1, PIK3R2, ACTB, PRKCA, ROCK2, MYLK4, IGF1, MRLC2, ACTN2, ITGA4, HGF, FLNC, COL5A3, KDR, VWF, CRKL, ITGA6, LOC100511937, LAMC2, MAPK8, LAMC1, ITGA2B	0.000239675
ssc05166:HTLV-I infection	59	2.25363	XPO1, TSPO, ADCY1, PDGFA, SLA-DRA, ADCY6, CDC16, PTTG1, SLA-6, TGFB1, CTNNB1, FOS, WNT4, CDKN2C, RANBP3, PIK3CA, PRKACA, AKT3, CHUK, AKT2, SLA-DMA, ICAM1, ANAPC5, SLC25A4, CD3D, SLA-DMB, RB1, EP300, ITGAL, WNT16, CREM, NFKBIA, NFYB, SRF, VCAM1, SLA-DQA1, KRAS, POLE3, LOC100626904, VDAC1P5, BUB3, PIK3R2, LOC100620317, IL2RB, IL2RA, CREB1, TGFBR1, VDAC2, FZD4, CDC27, FZD7, FZD6, FZD10, ATF4, ATF3, …	0.000331454
ssc00071:Fatty acid degradation	16	0.611154	CPT1B, ECI2, ACAA2, ACADSB, CPT2, ACADM, ACADL, ACAT1, HADHA, HADHB, ACSL1, ALDH2, ACSL4, HADH, ACSL3, ACAA1	0.000443416
ssc05145:Toxoplasmosis	30	1.14591	GNAI3, GNAI1, SLA-DRA, NFKBIB, NFKBIA, TGFB1, SLA-DQA1, IL10RA, LAMB1, HSPA8, IFNGR1, CHUK, AKT3, AKT2, SLA-DMA, LY96, SLA-DMB, CYCS, HSP70.2, TAB2, PPIF, CCR5, SLA-DRB1, ITGA6, IKBKG, JAK1, JAK2, MAPK8, LAMC2, LAMC1	0.000679918
ssc05212:Pancreatic cancer	21	0.802139	RALBP1, ARHGEF6, TGFBR1, ERBB2, RB1, TGFB1, RALGDS, CDC42, KRAS, RAC2, IKBKG, ARAF, PIK3CA, JAK1, MAPK8, LOC100511937, EGF, AKT3, CHUK, AKT2, PIK3R2	0.000684898
ssc04260:Cardiac muscle contraction	23	0.878533	ACTC1, COX7A2, TNNC1, LOC100524873, LOC100524613, ATP1B4, CACNG6, LOC100522678, CACNB1, LOC100156879, ATP1A1, COX5B, TPM4, COX6B, COX8H, TPM3, COX6C, UQCR10, LOC100624067, COX1, LOC100524239, LOC100524308, SLC9A1	0.000835679
ssc05164:Influenza A	42	1.60428	NXT1, XPO1, SLA-DRA, NFKBIB, RSAD2, NFKBIA, OAS2, CCL5, IVNS1ABP, ACTG1, SLA-DQA1, RAE1, LOC100157336, TICAM1, PIK3CA, FAS, DNAJC3, MX1, MAP2K7, HSPA8, IFNGR1, AKT3, PIK3R2, AKT2, SLA-DMA, ACTB, ICAM1, MAP2K2, CYCS, SLA-DMB, HSP70.2, TNFSF10, EP300, SLA-DRB1, JAK1, LOC100511937, MAPK8, JAK2, DNAJB1, EIF2AK3, KPNA1, ADAR	0.000879267
ssc00280:Valine, leucine and isoleucine degradation	17	0.649351	ALDH6A1, ACAA2, ACADSB, ACADM, LOC100518224, LOC100516841, ACAT1, HADHA, AUH, HADHB, DBT, IVD, DLD, ALDH2, HADH, HMGCL, ACAA1	0.0012892
ssc04910:Insulin signaling pathway	34	1.2987	PRKAG1, PHKA1, HK2, MKNK2, PPP1R3D, EIF4EBP1, PPP1R3C, KRAS, HK3, SOS2, FASN, PIK3CA, PRKACA, RAPGEF1, AKT3, AKT2, PIK3R2, SOCS2, MAP2K2, INPPL1, ACACA, FBP2, RPS6, IRS1, PPARGC1A, RPTOR, CRKL, PYGM, ARAF, CALM3, RHEB, LOC100511937, MAPK8, LIPE	0.00171619
ssc04666:Fc gamma R-mediated phagocytosis	24	0.91673	PRKCA, PTPRC, SPHK2, INPPL1, LIMK1, ARPC5, PLPP3, ARPC1A, CDC42, MYO10, CRKL, ARPC3, GAB2, RAC2, LOC100526019, CFL2, PLCG2, PIK3CA, LOC100511937, WASL, BIN1, AKT3, AKT2, PIK3R2	0.00188844
ssc04068:FoxO signaling pathway	34	1.2987	USP7, PRKAG1, CCNG2, PTEN, TGFB1, S1PR1, KRAS, HOMER3, SOS2, PIK3CA, CAT, EGF, CHUK, AKT3, PIK3R2, AKT2, GABARAPL2, SGK1, MAP2K2, TGFBR1, IGF1, HOMER1, IRS1, HOMER2, CCNB1, TNFSF10, EP300, CCNB2, PLK3, ARAF, LOC100511937, MAPK8, FBXO32, GADD45B	0.00224303
ssc04141:Protein processing in endoplasmic reticulum	39	1.48969	SEC31B, SEC31A, PDIA3, RAD23A, UBQLN4, LMAN2, UBQLN1, LMAN1, EDEM2, ERLEC1, HSPH1, DAD1, DNAJC3, TRAM1, SAR1A, MAP2K7, HSPA8, CUL1, DNAJC1, MBTPS2, MAN1A2, RRBP1, UBE2J1, HSP70.2, MAN1A1, HYOU1, ATXN3, ATF4, RNF5, MAPK8, DNAJB2, NFE2L2, DNAJB1, UGGT2, SSR4, UBXN6, EIF2AK3, SEC23B, SSR2	0.00224871
ssc05169:Epstein-Barr virus infection	30	1.14591	USP7, LOC100519870, ITGAL, NFKBIB, VIM, NFKBIA, SLA-6, PIK3CA, ENTPD1, MAP2K7, CHUK, AKT3, AKT2, PIK3R2, ICAM1, SNW1, RB1, TAB2, PSMC6, HDAC2, PSMD12, PSMD11, IKBKG, PSMC1, PLCG2, JAK1, MAPK8, LOC100511937, RBPJ, NCOR2	0.00272195
ssc04152:AMPK signaling pathway	30	1.14591	PFKFB4, PPP2R5A, LEPR, PRKAG1, CAMKK1, EIF4EBP1, PPP2CA, PPP2CB, EEF2K, FASN, PIK3CA, AKT3, AKT2, PIK3R2, CPT1B, PPP2R1A, PFKL, SCD, CREB1, ACACA, IGF1, PFKM, FBP2, PPARGC1A, IRS1, RPTOR, CD36, RHEB, LOC100511937, LIPE	0.00409258
ssc04066:HIF-1 signaling pathway	26	0.993125	CAMK2G, ERBB2, EGLN3, MKNK2, HK2, PDHB, EIF4EBP1, HK3, TEK, PIK3CA, ENO3, PDHA1, EGF, GAPDH, IFNGR1, AKT3, PIK3R2, AKT2, PRKCA, PDK1, MAP2K2, IGF1, RPS6, EP300, PLCG2, LOC100511937	0.00430733
ssc04914:Progesterone-mediated oocyte maturation	24	0.91673	ADCY1, GNAI3, ANAPC5, CPEB3, GNAI1, ADCY6, IGF1, CDC16, CDC27, CDC25A, CDC25B, CCNB1, CCNB2, KRAS, RPS6KA2, ARAF, BUB1, PIK3CA, PRKACA, MAPK8, LOC100511937, AKT3, AKT2, PIK3R2	0.00431022
ssc04150:mTOR signaling pathway	18	0.687548	PRKCA, IGF1, RRAGA, RPS6, RRAGD, PTEN, IRS1, RPTOR, RRAGC, EIF4EBP1, RPS6KA2, ULK3, RHEB, PIK3CA, LOC100511937, AKT3, PIK3R2, AKT2	0.00433684
ssc05200:Pathways in cancer	78	2.97937	PPARD, ADCY1, PDGFA, ADCY6, LPAR4, PTEN, TGFB1, CTNNB1, EDNRA, CDC42, FOS, EDNRB, AGTR1, WNT4, PIK3CA, PRKACA, FAS, PLCB1, AKT3, CHUK, AKT2, PRKCA, AR, RET, RALBP1, ROCK2, CYCS, RXRG, RB1, FGF21, CTNNA1, ARHGEF11, CRKL, EP300, NCOA4, LAMC2, MAPK8, LAMC1, ITGA2B, WNT16, GNAI3, GNAI1, ERBB2, EGLN3, NFKBIA, GNG11, KIT, TPM3, LOC100525960, KRAS, RAC2, LOC100157336, ITGAV, PLEKHG5, SOS2, EGF, LAMB1, P…	0.00462089
ssc03040:Spliceosome	32	1.22231	U2SURP, SF3B6, XAB2, SART1, SMNDC1, HNRNPA3, SF3B1, DDX46, RBM8A, PRPF8, PCBP1, CDC40, HSPA8, RBM25, DHX8, RBM22, BCAS2, MAGOH, HSP70.2, SNW1, CDC5L, RBMX, SF3A1, HNRNPU, SF3A3, EIF4A3, LOC100739009, SLU7, SNRPE, PRPF38B, RBM17, THOC1	0.00502511
ssc00620:Pyruvate metabolism	13	0.496562	ME1, LDHA, ME3, LDHD, ACACA, DLAT, ACSS2, ACAT1, PDHB, PKM, DLD, ALDH2, PDHA1	0.00650163
ssc05215:Prostate cancer	23	0.878533	AR, PDGFA, MAP2K2, ERBB2, CREB1, IGF1, NFKBIA, RB1, PTEN, CTNNB1, ATF4, EP300, KRAS, IKBKG, ARAF, SOS2, PIK3CA, LOC100511937, EGF, AKT3, CHUK, AKT2, PIK3R2	0.00678021
ssc05214:Glioma	18	0.687548	PRKCA, PDGFA, MAP2K2, CAMK2G, IGF1, RB1, PTEN, KRAS, ARAF, SOS2, PLCG2, CALM3, PIK3CA, LOC100511937, EGF, AKT3, AKT2, PIK3R2	0.00755855
ssc04920:Adipocytokine signaling pathway	20	0.763942	CPT1B, NFKBIB, LEPR, PRKAG1, RXRG, NFKBIA, PPARGC1A, IRS1, CAMKK1, TNFRSF1B, CD36, ACSL1, IKBKG, MAPK8, JAK2, ACSL4, ACSL3, AKT3, CHUK, AKT2	0.00785197
ssc04071:Sphingolipid signaling pathway	28	1.06952	GNAI3, PPP2R5A, GNAI1, CERS4, PTEN, ASAH1, S1PR1, KRAS, GAB2, RAC2, PPP2CA, S1PR5, PPP2CB, PIK3CA, FCER1G, PLCB1, AKT3, PIK3R2, AKT2, PRKCA, PPP2R1A, SPTLC1, SPHK2, MAP2K2, ROCK2, LOC100511937, MAPK8, DEGS1	0.00812317
ssc04015:Rap1 signaling pathway	45	1.71887	ITGAL, ADCY1, GNAI3, LOC100517325, PDGFA, GNAI1, ADCY6, LPAR4, KIT, CTNNB1, ACTG1, LOC100525960, CDC42, PFN2, KRAS, RAC2, P2RY1, TEK, PIK3CA, RAPGEF4, PLCB1, THBS1, EGF, RAPGEF1, AKT3, PIK3R2, AKT2, PRKCA, ACTB, MAP2K2, IGF1, HGF, FGF21, EPHA2, RALGDS, KDR, PRKD2, CRKL, CALM3, LOC100511937, PARD6G, ARAP3, PRKD3, LCP2, ITGA2B	0.00979859
ssc04261:Adrenergic signaling in cardiomyocytes	31	1.18411	ADCY1, GNAI3, PPP2R5A, GNAI1, TNNC1, CREM, CAMK2G, ATP1B4, ADCY6, CACNB1, TPM4, TPM3, AGTR1, AGTR2, PPP2CA, PPP2CB, RAPGEF4, PRKACA, SCN7A, PLCB1, AKT3, AKT2, PPP2R1A, ACTC1, CREB1, CACNG6, ATP1A1, ATF4, CALM3, SCN4B, SLC9A1	0.0104118
ssc05213:Endometrial cancer	15	0.572956	MAP2K2, ERBB2, CTNNA1, PTEN, CTNNB1, KRAS, ARAF, SOS2, ILK, PIK3CA, LOC100511937, EGF, AKT3, AKT2, PIK3R2	0.0116876
ssc05221:Acute myeloid leukemia	16	0.611154	PPARD, MAP2K2, PIM1, KIT, EIF4EBP1, KRAS, LOC100157336, IKBKG, ARAF, SOS2, PIK3CA, LOC100511937, AKT3, CHUK, PIK3R2, AKT2	0.0120955
ssc05220:Chronic myeloid leukemia	19	0.725745	MAP2K2, TGFBR1, NFKBIA, RB1, TGFB1, HDAC2, KRAS, CRKL, GAB2, IKBKG, ARAF, SOS2, PIK3CA, LOC100511937, ABL1, AKT3, CHUK, AKT2, PIK3R2	0.0124937
ssc04144:Endocytosis	49	1.87166	CHMP3, LOC100622196, SLA-6, CDC42, GBF1, ZFYVE16, WWP1, KIAA1033, VPS4A, SH3GL3, KIF5B, LOC100037957, HSP70.2, ARPC1A, RAB11FIP5, RAB11FIP2, CCR5, LOC100520820, WASL, BIN1, VPS26A, CAV2, RAB7A, CAV1, ARFGAP3, STAM2, CYTH4, LOC100522401, SNX1, ARPC5, ARF5, CAPZB, CHMP2B, ARPC3, LOC100157336, WIPF2, VPS35, EHD1, HSPA8, IL2RB, IL2RA, TGFBR1, ARF1, PARD6G, GRK5, VPS28, ARAP3, GRK3, ARAP1	0.0164411
ssc05223:Non-small cell lung cancer	15	0.572956	PRKCA, MAP2K2, ERBB2, RXRG, RB1, KRAS, ARAF, SOS2, PLCG2, PIK3CA, LOC100511937, EGF, AKT3, AKT2, PIK3R2	0.0167251
ssc04919:Thyroid hormone signaling pathway	27	1.03132	ATP1B4, CTNNB1, ACTG1, WNT4, KRAS, ITGAV, TBC1D4, PIK3CA, PLCD1, PRKACA, PLCB1, AKT3, AKT2, PIK3R2, ACTB, PRKCA, MAP2K2, RXRG, ATP1A1, NCOA1, HDAC2, EP300, NOTCH4, PLCG2, RHEB, LOC100511937, SLC9A1	0.0169368
ssc03320:PPAR signaling pathway	18	0.687548	ACOX2, SLC27A1, CPT1B, PPARD, CPT2, ACADM, SCD, RXRG, AQP7, ACADL, CD36, ACSL1, ILK, UBC, ACSL4, ACSL3, ACAA1, ANGPTL4	0.0196088
ssc04916:Melanogenesis	23	0.878533	PRKCA, LOC100620317, ADCY1, WNT16, GNAI3, MAP2K2, GNAI1, CAMK2G, CREB1, ADCY6, KIT, FZD4, FZD7, FZD6, CTNNB1, EDNRB, WNT4, FZD10, EP300, KRAS, CALM3, PRKACA, PLCB1	0.0196566
ssc04145:Phagosome	32	1.22231	RAB7A, DYNC1LI1, STX7, SLA-DRA, SLA-6, ATP6V0C, ACTG1, LOC100513005, SLA-DQA1, STX12, ITGAV, TAP1, PLA2R1, THBS1, THBS2, THBS3, ACTB, MRC1, SLA-DMA, SLA-DMB, MRC2, CTSV, ATP6V1C1, CTSL, LAMP2, TUBA8, CD36, SLA-DRB1, CD209, TUBA4A, CD14, DYNC1I2	0.0223309
ssc05211:Renal cell carcinoma	17	0.649351	EPAS1, MAP2K2, EGLN3, HGF, TGFB1, CDC42, EP300, KRAS, CRKL, ARAF, SOS2, PIK3CA, LOC100511937, RAPGEF1, AKT3, AKT2, PIK3R2	0.0264443
ssc00640:Propanoate metabolism	9	0.343774	ALDH6A1, LDHA, ACADM, ACACA, SUCLA2, ACSS2, ACSS3, ACAT1, HADHA	0.0267103
ssc05142:Chagas disease (American trypanosomiasis)	25	0.954927	PPP2R1A, ADCY1, GNA15, GNAI3, CD3D, GNAI1, TGFBR1, NFKBIA, CCL5, TGFB1, FOS, PPP2CA, TICAM1, PPP2CB, IKBKG, PIK3CA, LOC100511937, MAPK8, FAS, PLCB1, IFNGR1, AKT3, CHUK, AKT2, PIK3R2	0.0282854
ssc04722:Neurotrophin signaling pathway	27	1.03132	CAMK2G, NFKBIB, NFKBIA, BEX3, CDC42, KRAS, SOS2, PIK3CA, SH2B1, RAPGEF1, FRS2, MAP2K7, AKT3, AKT2, PIK3R2, MAP2K2, IRS1, ATF4, CRKL, PSEN1, RPS6KA2, PSEN2, PLCG2, CALM3, MAPK8, LOC100511937, ABL1	0.0284921
ssc05231:Choline metabolism in cancer	23	0.878533	PRKCA, SLC44A1, SLC44A2, PDGFA, MAP2K2, LYPLA1, RALGDS, PLPP3, FOS, EIF4EBP1, KRAS, RAC2, SOS2, RHEB, PIK3CA, SLC22A3, LOC100511937, MAPK8, WASL, EGF, AKT3, AKT2, PIK3R2	0.0309297
ssc04710:Circadian rhythm	9	0.343774	LOC100154609, NPAS2, CREB1, PRKAG1, PER1, ARNTL, PER3, FBXL3, CUL1	0.0336142
ssc01230:Biosynthesis of amino acids	16	0.611154	MAT2A, PFKL, IDH3B, PGAM2, PFKM, ASL, PKM, GLUL, GOT1, MTR, PHGDH, IDH2, ENO3, MAT2B, PGK1, GAPDH	0.0355742
ssc04670:Leukocyte transendothelial migration	26	0.993125	ITGAL, GNAI3, LOC100517325, GNAI1, MYL10, CLDN11, CTNNB1, ACTG1, VCAM1, CDC42, RAC2, PIK3CA, RAPGEF4, PIK3R2, LOC100152815, PRKCA, ACTB, ICAM1, ROCK2, ACTN2, MRLC2, ITGA4, CTNNA1, PECAM1, PLCG2, LOC100511937	0.0363018
ssc04110:Cell cycle	26	0.993125	PTTG1, CDC16, TGFB1, RAD21, CDKN2C, BUB1, ORC4, STAG2, CUL1, BUB3, TFDP1, ANAPC5, RB1, CDC27, WEE1, CDC25A, SMC3, CDC25B, CCNB1, CCNB2, HDAC2, EP300, YWHAH, YWHAQ, GADD45B, ABL1	0.0363018
ssc00250:Alanine, aspartate and glutamate metabolism	11	0.420168	ADSS, GLUL, GOT1, FOLH1B, GFPT1, GLUD1, ALDH4A1, ASNS, ASL, DDO, RIMKLB	0.0370045
ssc05414:Dilated cardiomyopathy	20	0.763942	ACTB, ADCY1, ACTC1, TNNC1, ADCY6, CACNG6, CACNB1, IGF1, ITGA4, TGFB1, TPM4, TPM3, ACTG1, DES, ITGA6, ITGAV, ITGB6, PRKACA, SGCA, ITGA2B	0.0393139
ssc04810:Regulation of actin cytoskeleton	40	1.52788	ITGAL, PDGFA, PPP1R12C, MYL10, ARPC5, ACTG1, CDC42, PFN2, KRAS, ARPC3, RAC2, ITGAV, SOS2, ITGB6, PIK3CA, EGF, PIK3R2, ACTB, LOC100152815, LIMK1, MAP2K2, ROCK2, ARHGEF6, MYLK4, ACTN2, MRLC2, ITGA4, FGF21, NCKAP1, ARPC1A, CRKL, ITGA6, CFL2, ARAF, LOC100511937, TMSB4X, WASL, PIP4K2A, ITGA2B, SLC9A1	0.0412739
ssc04923:Regulation of lipolysis in adipocytes	15	0.572956	ADCY1, PLA2G16, GNAI3, GNAI1, ADCY6, ABHD5, AQP7, IRS1, PIK3CA, PRKACA, LOC100511937, LIPE, AKT3, PIK3R2, AKT2	0.0418
ssc04931:Insulin resistance	25	0.954927	CPT1B, SLC27A1, PRKAG1, CREB1, NFKBIA, IRS1, PTEN, PPARGC1A, LOC100152585, PPP1R3D, PPP1R3C, CD36, PYGM, RPS6KA2, GFPT1, MLX, PIK3CA, TBC1D4, LOC100511937, MLXIP, MAPK8, OGT, AKT3, AKT2, PIK3R2	0.0460528
ssc04664:Fc epsilon RI signaling pathway	16	0.611154	MAP2K2, KRAS, RAC2, GAB2, LOC100526019, SOS2, PLCG2, FCER1G, PIK3CA, MAPK8, LOC100511937, MAP2K7, AKT3, LCP2, PIK3R2, AKT2	0.0461185
ssc04012:ErbB signaling pathway	20	0.763942	PRKCA, MAP2K2, ERBB2, CAMK2G, EIF4EBP1, KRAS, CRKL, ARAF, SOS2, PLCG2, HBEGF, PIK3CA, MAPK8, LOC100511937, EGF, ABL1, MAP2K7, AKT3, AKT2, PIK3R2	0.0487992
ssc04915:Estrogen signaling pathway	22	0.840336	ADCY1, GNAI3, MAP2K2, GNAI1, FKBP5, CREB1, ADCY6, HSP70.2, FOS, ATF4, KRAS, SOS2, CALM3, HBEGF, PIK3CA, LOC100511937, PRKACA, PLCB1, HSPA8, AKT3, AKT2, PIK3R2	0.0489211
ssc00130:Ubiquinone and other terpenoid-quinone biosynthesis	5	0.190985	GGCX, VKORC1L1, NQO1, COQ5, COQ6	0.051516
ssc05132:Salmonella infection	19	0.725745	ACTB, RAB7A, DYNC1LI1, ROCK2, CXCL2, ARPC5, LOC396567, FLNC, ARPC1A, ACTG1, CDC42, FOS, PFN2, ARPC3, MAPK8, WASL, CD14, DYNC1I2, IFNGR1	0.0568702
ssc04114:Oocyte meiosis	24	0.91673	PPP2R1A, ADCY1, AR, ANAPC5, CPEB3, PPP2R5A, CAMK2G, ADCY6, IGF1, PTTG1, CDC16, CDC27, SMC3, YWHAH, CCNB2, SLK, RPS6KA2, PPP2CA, PPP2CB, YWHAQ, BUB1, CALM3, PRKACA, CUL1	0.0581526
ssc04310:Wnt signaling pathway	27	1.03132	PPARD, WNT16, CAMK2G, DAAM2, CTNNB1, GPC4, CSNK2A2, WNT4, RAC2, CACYBP, PRKACA, PLCB1, CUL1, PRKCA, CSNK1A1, TBL1XR1, LOC100620317, ROCK2, FZD4, FZD7, FZD6, FZD10, EP300, SFRP1, PSEN1, SFRP2, MAPK8	0.0583529
ssc04662:B cell receptor signaling pathway	17	0.649351	INPPL1, MAP2K2, NFKBIB, NFKBIA, FOS, KRAS, RAC2, LOC100526019, IKBKG, SOS2, PLCG2, PIK3CA, LOC100511937, AKT3, CHUK, AKT2, PIK3R2	0.0627122
ssc04146:Peroxisome	19	0.725745	ACOX2, ECI2, ECH1, AMACR, PEX5, PMVK, DDO, PEX5L, ACSL1, DHRS4, ACOT8, AGPS, PEX16, IDH2, CAT, ACSL4, ACSL3, HMGCL, ACAA1	0.0629899
ssc04612:Antigen processing and presentation	16	0.611154	SLA-DMA, PDIA3, SLA-DRA, CREB1, SLA-DMB, HSP70.2, NFYB, SLA-6, CTSV, TAPBP, B2M, SLA-DQA1, CTSL, SLA-DRB1, TAP1, HSPA8	0.0657733
ssc00020:Citrate cycle (TCA cycle)	9	0.343774	SDHB, SDHC, DLD, IDH2, IDH3B, PDHA1, DLAT, SUCLA2, PDHB	0.0728821
ssc03013:RNA transport	31	1.18411	NXT1, RPP38, XPO1, EIF5B, EIF4EBP3, NDC1, SUMO2, NUP214, EIF4EBP1, RAE1, RBM8A, NUP210, EIF3E, LOC100525426, EIF1, DDX20, NUP54, PABPC1, EIF2B2, EEF1A1, NUP133, MAGOH, FMR1, SAP18, NUP85, FXR1, PHAX, EIF4A3, THOC7, NUP107, THOC1	0.0731312
ssc05410:Hypertrophic cardiomyopathy (HCM)	18	0.687548	ACTB, ACTC1, TNNC1, PRKAG1, CACNG6, CACNB1, IGF1, ITGA4, TGFB1, TPM4, TPM3, ACTG1, DES, ITGA6, ITGAV, ITGB6, SGCA, ITGA2B	0.0733677
ssc04922:Glucagon signaling pathway	21	0.802139	PPP4R3B, CPT1B, LDHA, PRKAG1, CAMK2G, CREB1, PHKA1, ACACA, PGAM2, PPARGC1A, PDHB, PKM, ATF4, EP300, PYGM, CALM3, PRKACA, PDHA1, PLCB1, AKT3, AKT2	0.0750261
ssc05416:Viral myocarditis	15	0.572956	SLA-DMA, ACTB, ITGAL, ICAM1, CAV1, SLA-DRA, CYCS, SLA-DMB, SLA-6, ACTG1, SLA-DQA1, SLA-DRB1, RAC2, ABL1, SGCA	0.0771594
ssc04550:Signaling pathways regulating pluripotency of stem cells	27	1.03132	BMI1, WNT16, IL6ST, CTNNB1, WNT4, KRAS, PIK3CA, AKT3, PIK3R2, AKT2, SETDB1, LOC100620317, MAP2K2, LIFR, IGF1, FZD4, FZD7, FZD6, ACVR2A, FZD10, ACVR2B, RIF1, JAK1, JAK2, LOC100511937, ZFHX3, BMPR1A	0.0796491
ssc05210:Colorectal cancer	16	0.611154	MSH6, TGFBR1, CYCS, TGFB1, RALGDS, CTNNB1, FOS, KRAS, RAC2, ARAF, PIK3CA, MAPK8, LOC100511937, AKT3, PIK3R2, AKT2	0.0816075
ssc04668:TNF signaling pathway	23	0.878533	ICAM1, DNM1L, CREB1, CXCL2, NFKBIA, CX3CL1, CCL5, TAB2, VCAM1, FOS, ATF4, TNFRSF1B, IKBKG, PIK3CA, BCL3, LOC100511937, MAPK8, FAS, MAP2K7, AKT3, CHUK, AKT2, PIK3R2	0.0861241
ssc05203:Viral carcinogenesis	36	1.3751	USP7, IL6ST, NFKBIA, SLA-6, SRF, PKM, CDC42, KRAS, REL, GTF2A1, LOC100515414, GTF2A2, VDAC1P5, PIK3CA, PRKACA, PIK3R2, CREB1, DDB1, ACTN2, SNW1, RB1, GTF2B, ATF4, YWHAH, HDAC2, EP300, MRPS18B, CCR5, LOC100511934, PSMC1, IKBKG, YWHAQ, JAK1, LOC100511937, RBPJ, HDAC9	0.0977746

## Sheet: H
KEGG analysis of differently expressed genes between LT90D and LW90D samples
Term	Count	%	Genes	P value
ssc03010:Ribosome	37	4.08389	RPL14, RPL13, MRPS10, RPL39, RPL30, MRPL13, MRPL15, RPS3A, RPL31, MRPL17, RPL9, RPL34, MRPL19, RPL11, RPL5, RSL24D1, RPL4, RPL10A, RPS21, RPS23, MRPL1, RPL26, RPL27, RPS9, RPL24, MRPL30, RPS6, MRPS2, RPS8, RPL29, MRPL22, RPS16, MRPL28, RPS17, RPS13, RPS10, RPS11	4.92942e-15
ssc00190:Oxidative phosphorylation	28	3.09051	NDUFB3, NDUFB5, NDUFB6, NDUFB8, NDUFAB1, CYTB, ATP6V1B2, COX5B, ATP6V0C, NDUFS6, UQCR10, ATP5O, ATP5I, COX17, ND6, ND1, NDUFA3, ND4, ND5, ND2, ND3, NDUFA13, NDUFA1, COX8H, COX6B, NDUFA11, COX6C, SDHB	3.82618e-09
ssc05012:Parkinson's disease	29	3.20088	NDUFB3, NDUFB5, NDUFB6, GNAI1, NDUFB8, NDUFAB1, CYTB, COX5B, NDUFS6, UQCR10, VDAC1P5, PRKACA, ATP5O, ND6, ND1, NDUFA3, ND4, ND5, ND2, ND3, CYCS, NDUFA13, NDUFA1, COX8H, COX6B, NDUFA11, COX6C, SDHB, LRRK2	1.17276e-08
ssc01100:Metabolic pathways	102	11.2583	NDUFAB1, COX5B, UXS1, PDHB, TPK1, UQCR10, NANS, AGPS, SPR, ACAA2, SPTLC1, LOC100516841, COX6B, COX6C, MGAT2, CD38, LOC100524934, LCLAT1, ADSL, KDSR, PCCB, NMNAT1, ME1, GLUD1, ATP6V1B2, EXTL1, ACAT1, ATP6V0C, MUT, POLE3, ARG2, PEMT, LIAS, AMD1, NADK2, B4GALT2, MAOA, EPRS, TKT, DLAT, COX8H, MMAB, ALG10, IDI1, FPGT, ACOX2, NAMPT, ACOT4, NDUFS6, AGPAT5, P4HA3, PIGC, ATP5O, ATP5I, SUCLA2, PLCB1, COX17…	1.29997e-06
ssc00970:Aminoacyl-tRNA biosynthesis	12	1.3245	IARS, TARS, CARS, NARS, DARS, NARS2, RARS, SARS, AARS, GARS, HARS, EPRS	3.31929e-05
ssc05016:Huntington's disease	26	2.86976	NDUFB3, NDUFB5, NDUFB6, POLR2E, NDUFB8, NDUFAB1, CYTB, COX5B, NDUFS6, UQCR10, VDAC1P5, ATP5O, PLCB1, NDUFA3, CREB1, CYCS, NDUFA13, SOD1, NDUFA1, COX8H, COX6B, COX6C, NDUFA11, SDHB, HDAC2, LOC100524934	0.000110875
ssc03015:mRNA surveillance pathway	13	1.43488	NXT1, PPP2R1A, PPP2R5A, MAGOH, HBS1L, SAP18, ETF1, EIF4A3, PPP2CA, PPP2CB, LOC100525426, CPSF3, SSU72	0.00187935
ssc03008:Ribosome biogenesis in eukaryotes	13	1.43488	EIF6, NXT1, UTP4, UTP15, FBL, WDR75, RCL1, LOC100625226, SBDS, WDR3, SPATA5, XRN1, WDR43	0.00187935
ssc04932:Non-alcoholic fatty liver disease (NAFLD)	19	2.09713	NDUFB3, NDUFB5, NDUFB6, NDUFA3, NDUFB8, CYCS, NDUFAB1, NDUFA13, CYTB, COX5B, NDUFA1, COX6B, COX8H, COX6C, NDUFA11, NDUFS6, SDHB, UQCR10, PIK3CA	0.0034931
ssc05010:Alzheimer's disease	20	2.20751	NDUFB3, NDUFB5, NDUFB6, NDUFA3, NDUFB8, CYCS, NDUFAB1, NDUFA13, CYTB, COX5B, NDUFA1, COX6B, COX8H, COX6C, NDUFA11, NDUFS6, SDHB, UQCR10, ATP5O, PLCB1	0.00406408
ssc01200:Carbon metabolism	14	1.54525	ME1, SDHB, MUT, ACADM, ADPGK, GLUD1, PHGDH, TKT, DLAT, RPIA, SUCLA2, PCCB, ACAT1, PDHB	0.00469603
ssc03040:Spliceosome	16	1.766	BCAS2, MAGOH, CWC15, U2SURP, SF3B4, SF3A1, SART1, HNRNPA3, LOC100515066, EIF4A3, PPIH, PCBP1, CDC40, SNRNP27, SNRPE, PRPF38B	0.00543478
ssc04146:Peroxisome	12	1.3245	ACOX2, ECH1, AGPS, PEX2, AMACR, DECR2, PEX5, PEX13, SOD1, PEX5L, ACSL3, PRDX1	0.00568402
ssc04071:Sphingolipid signaling pathway	14	1.54525	PPP2R1A, SPTLC1, GNAI1, SGPP1, PPP2R5A, PTEN, KRAS, S1PR1, PPP2CA, MAPK14, PPP2CB, RHOA, PIK3CA, PLCB1	0.00946831
ssc04150:mTOR signaling pathway	9	0.993377	EIF4EBP1, RPS6KA3, ULK1, RHEB, PIK3CA, RPS6KB1, RPS6, RRAGD, PTEN	0.0147303
ssc00620:Pyruvate metabolism	7	0.772627	ME1, LDHD, GLO1, GRHPR, DLAT, ACAT1, PDHB	0.0157467
ssc00280:Valine, leucine and isoleucine degradation	8	0.883002	DBT, ACAA2, MUT, ACADM, LOC100516841, AACS, PCCB, ACAT1	0.0164795
ssc05142:Chagas disease (American trypanosomiasis)	12	1.3245	C1QA, PPP2R1A, ADCY1, GNAI1, MAPK14, PPP2CA, PPP2CB, NFKBIA, PIK3CA, CCL5, PLCB1, IFNGR1	0.0364098
ssc00640:Propanoate metabolism	5	0.551876	MUT, ACADM, SUCLA2, PCCB, ACAT1	0.0481615
ssc05203:Viral carcinogenesis	17	1.87638	USP7, IL6ST, CREB1, NFKBIA, POLB, GTF2E2, HDAC2, KRAS, MRPS18B, GTF2A1, CCR5, GTF2A2, VDAC1P5, RHOA, PIK3CA, PRKACA, DNAJA3	0.0566401
ssc04261:Adrenergic signaling in cardiomyocytes	13	1.43488	PPP2R1A, ADCY1, GNAI1, PPP2R5A, CREB1, TPM4, AGTR1, PPP2CA, MAPK14, PPP2CB, SCN4B, PRKACA, PLCB1	0.0596058
ssc04728:Dopaminergic synapse	12	1.3245	PPP2R1A, KIF5B, PPP2R5A, GNAI1, MAPK14, PPP2CA, CREB1, MAOA, PPP2CB, PRKACA, GNG11, PLCB1	0.065581
ssc01130:Biosynthesis of antibiotics	17	1.87638	ACAA2, SDHB, DBT, ACADM, ADPGK, ARG2, PHGDH, ADSL, TKT, RPIA, DLAT, SUCLA2, IDI1, ACAT1, PCCB, PDHB, AMPD1	0.0686014
ssc03013:RNA transport	14	1.54525	NXT1, XPOT, PAIP1, MAGOH, SAP18, SUMO2, EIF4A3, EIF4EBP1, EIF3E, EIF2S2, LOC100525426, THOC7, EIF1, NUP107	0.0831774
