# Supplementary material for: Identification of CircRNA-Associated ceRNA Networks Using Longissimus Thoracis of Pigs of Different Breeds and Growth Stages
Source: Research Square preprint supplement (doi:10.21203/rs.3.rs-852221/v1), 2021-11-30
Supplement: Supplementary file 6 [file baba1c7b245cd08835c65f14.xlsx]

## Sheet: Sheet1
The expression levels of circRNA candidates identified from rRNA-depleted libraries
Name	Chrom	Start	End	Strand	Exon size	Hosting isoform	Gene	Exon index	Left intron/Right intron	Counts												Normalization												LT1D VS LW1D			LT1D VS LT90D			LW1D VS LW90D			LT90D VS LW90D
										LT1D1	LT1D2	LT1D3	LW1D1	LW1D2	LW1D3	LT90D1	LT90D2	LT90D3	LW90D1	LW90D2	LW90D3	LT1D1	LT1D2	LT1D3	LW1D1	LW1D2	LW1D3	LT90D1	LT90D2	LT90D3	LW90D1	LW90D2	LW90D3	logFC	P Value	FDR	logFC	P Value	FDR	logFC	P Value	FDR	logFC	P Value	FDR
circ0470	chr1	161192983	161204051	-	6	ENSSSCT00000024292.1	ENSSSCG00000030470.1	20,19,18,17,16,15	chr1:161192521-161192983|chr1:161204051-161219333	2	1	0	7	7	10	11	4	2	0	0	0	572.633	317.991	0	842.459	816.46	1170.71	852.008	485.461	265.788	0	0	0	-1.91265	0.0244849	0.427465	-1.19707	0.180027	0.630995	5.65371	0.000174737	0.0234287	4.93814	0.00235628	0.171701
circ3514	chr6	73931071	73932260	+	4	ENSSSCT00000003904.2	ENSSSCG00000003514.2	19,20,21,22	chr6:73930100-73931071|chr6:73932260-73933018	3	1	3	8	5	8	3	1	0	0	0	0	858.949	317.991	453.383	962.81	583.186	936.569	232.366	121.365	0	0	0	0	-0.617377	0.377168	0.740637	1.8238	0.0413399	0.437012	5.46681	0.000290195	0.0301071	3.02564	0.114077	0.572872
circENSSSCG00000004082.2_3	chr1	16415159	16473752	+	17	ENSSSCT00000004511.2	ENSSSCG00000004082.2	12,13,14,15,16,17,18,19,20,21,22,23,24,25,26,27,28	chr1:16412381-16415159|chr1:16473752-16478397	1	0	1	9	11	11	0	0	0	0	1	0	286.316	0	151.128	1083.16	1283.01	1287.78	0	0	0	0	290.72	0	-2.86535	0.000507631	0.140868	3.15106	0.0336381	0.409939	3.49866	0.000280655	0.0301071	-2.51775	0.111523	0.569761
circ4343	chr2	147049941	147052745	+	4	ENSSSCT00000015671.2	ENSSSCG00000014343.2	7,8,9,10	chr2:147049290-147049941|chr2:147052745-147053804	4	4	21	18	22	15	50	25	19	2	5	1	1145.27	1271.96	3173.68	2166.32	2566.02	1756.07	3872.76	3034.13	2524.99	568.485	1453.6	242.262	-0.0906996	0.853454	1	-0.641269	0.174278	0.62612	1.5451	0.0110173	0.213469	2.09567	0.000337662	0.0471601
circAACS	chr14	29836043	29848997	-	5	ENSSSCT00000010695.2	AACS	11,10,9,8,7	chr14:29829894-29836043|chr14:29848997-29855812	0	0	2	0	0	0	1	2	0	0	0	0	0	0	302.256	0	0	0	77.4553	242.731	0	0	0	0	2.84791	0.132095	0.602346	0.131384	0.941162	1	0	1	1	2.71653	0.249842	0.644704
circAAGAB	chr1	182854629	182860290	+	4	ENSSSCT00000005463.2	AAGAB	3,4,5,6	chr1:182853919-182854629|chr1:182860290-182883940	0	0	2	0	7	0	0	0	0	2	0	1	0	0	302.256	0	816.46	0	0	0	0	568.485	0	242.262	-1.06752	0.587527	0.878408	2.86383	0.111252	0.562804	0.0109339	0.995403	1	-3.92042	0.0465786	0.461487
circAAGAB_2	chr1	182856035	182860290	+	2	ENSSSCT00000005463.2	AAGAB	5,6	chr1:182855465-182856035|chr1:182860290-182883940	0	0	0	0	0	0	0	0	0	4	0	0	0	0	0	0	0	0	0	0	0	1136.97	0	0	0	1	1	0	1	1	-4.36753	0.0426173	0.337211	-4.36753	0.0385818	0.44905
circAARS	chr6	13369363	13371247	-	3	ENSSSCT00000003017.2	AARS	13,12,11	chr6:13367842-13369363|chr6:13371247-13371914	0	0	3	1	2	0	1	0	1	0	0	0	0	0	453.383	120.351	233.274	0	77.4553	0	132.894	0	0	0	0.605575	0.67333	0.934577	1.23135	0.405471	0.771131	2.84138	0.180789	0.508992	2.21561	0.284157	0.653437
circAASDHPPT	chr9	39942277	39978970	+	4	ENSSSCT00000016362.2	AASDHPPT	2,3,4,5	chr9:39940554-39942277|chr9:39978970-39982291	0	0	4	1	3	1	5	1	0	0	0	0	0	0	604.511	120.351	349.911	117.071	387.276	121.365	0	0	0	0	0.317855	0.807518	0.981603	0.401674	0.759446	0.970714	3.49265	0.0956906	0.434811	3.40883	0.100952	0.548875
circAASS	chr18	26590274	26607594	+	10	ENSSSCT00000018087.2	AASS	2,3,4,5,6,7,8,9,10,11	chr18:26579492-26590274|chr18:26607594-26614548	6	11	28	13	1	10	1	4	15	1	2	4	1717.9	3497.9	4231.58	1564.57	116.637	1170.71	77.4553	485.461	1993.41	284.243	581.441	969.047	1.72209	0.0548419	0.498382	1.92737	0.0337675	0.409939	0.598059	0.547387	0.757886	0.39278	0.696073	0.908535
circAATF	chr12	40118867	40123399	+	4	ENSSSCT00000019257.2	AATF	5,6,7,8	chr12:40084568-40118867|chr12:40123399-40147659	0	1	0	2	1	0	2	1	0	0	2	0	0	317.991	0	240.703	116.637	0	154.911	121.365	0	0	581.441	0	-0.421831	0.788537	0.971794	-0.195919	0.892468	1	-0.572087	0.704169	0.878115	-0.797998	0.597419	0.830243
circABCA5	chr12	11441894	11483250	-	25	ENSSSCT00000033236.1	ABCA5	27,26,25,24,23,22,21,20,19,18,17,16,15,14,13,12,11,10,9,8,7,6,5,4,3	None|chr12:11483250-11485522	0	0	0	0	5	0	0	0	0	0	0	0	0	0	0	0	583.186	0	0	0	0	0	0	0	-3.48121	0.477561	0.795785	0	1	1	3.48121	0.486291	0.702606	0	1	1
circABCA5_2	chr12	11466493	11483250	-	11	ENSSSCT00000018784.2	ABCA5	14,13,12,11,10,9,8,7,6,5,4	chr12:11465154-11466493|chr12:11483250-11485522	1	1	1	2	3	3	1	0	1	0	0	0	286.316	317.991	151.128	240.703	349.911	351.213	77.4553	0	132.894	0	0	0	-0.427094	0.655597	0.926459	1.48187	0.206074	0.652755	4.12486	0.0196391	0.252002	2.2159	0.256622	0.647009
circABCA5_3	chr12	11470994	11483250	-	8	ENSSSCT00000018784.2	ABCA5	11,10,9,8,7,6,5,4	chr12:11469152-11470994|chr12:11483250-11485522	0	0	0	1	4	2	3	0	1	0	0	0	0	0	0	120.351	466.549	234.142	232.366	0	132.894	0	0	0	-3.94038	0.0318395	0.45914	-2.98079	0.111999	0.563696	3.94038	0.0431558	0.337211	2.98079	0.136978	0.576499
circABCC9	chr5	54839917	54843310	+	3	ENSSSCT00000000614.2	ABCC9	6,7,8	chr5:54837724-54839917|chr5:54843310-54844846	0	1	10	6	14	15	23	4	2	1	1	2	0	317.991	1511.28	722.108	1632.92	1756.07	1781.47	485.461	265.788	284.243	290.72	484.524	-0.930508	0.258951	0.65356	-0.30977	0.710139	0.94656	1.88141	0.0460871	0.345713	1.26067	0.187353	0.606976
circABCC9_2	chr5	54851925	54877125	+	6	ENSSSCT00000000614.2	ABCC9	11,12,13,14,15,16	chr5:54846944-54851925|chr5:54877125-54888340	0	0	3	0	3	0	0	0	0	0	0	0	0	0	453.383	0	349.911	0	0	0	0	0	0	0	0.401066	0.896101	1	3.23015	0.200527	0.644091	2.82908	0.334554	0.615072	0	1	1
circABCC9_3	chr5	54892359	54911535	+	6	ENSSSCT00000000614.2	ABCC9	19,20,21,22,23,24	chr5:54889896-54892359|chr5:54911535-54912754	0	0	0	1	0	0	3	0	0	0	0	0	0	0	0	120.351	0	0	232.366	0	0	0	0	0	-1.62507	0.429043	0.762693	-2.40771	0.298787	0.701987	1.62507	0.454802	0.689477	2.40771	0.322029	0.669693
circABHD17B	chr1	251721538	251726583	-	2	ENSSSCT00000026305.1	ABHD17B	3,2	chr1:251718819-251721538|chr1:251726583-251758602	1	0	2	0	2	2	2	0	4	0	1	1	286.316	0	302.256	0	233.274	234.142	154.911	0	531.576	0	290.72	242.262	0.421076	0.734718	0.949891	-0.0163658	0.993048	1	-0.176928	0.895056	1	0.260513	0.842615	0.994957
circABL1	chr1	304797553	304798876	+	2	ENSSSCT00000006275.2	ABL1	2,3	chr1:304686024-304797553|chr1:304798876-304806906	0	1	0	6	2	0	2	1	1	0	0	0	0	317.991	0	722.108	233.274	0	154.911	121.365	132.894	0	0	0	-1.7127	0.26412	0.655369	-0.611868	0.694146	0.941819	4.13678	0.0436165	0.337929	3.03595	0.145241	0.578381
circABL1_2	chr1	304797553	304807179	+	3	ENSSSCT00000006275.2	ABL1	2,3,4	chr1:304686024-304797553|chr1:304807179-304815264	3	0	2	0	3	5	0	0	0	0	1	5	858.949	0	302.256	0	349.911	585.355	0	0	0	0	290.72	1211.31	0.286829	0.824987	0.991167	4.40355	0.00640384	0.210448	-0.688308	0.58831	0.795969	-4.80503	0.00289714	0.176568
circABL1_3	chr1	304797553	304820843	+	7	ENSSSCT00000006275.2	ABL1	2,3,4,5,6,7,8	chr1:304686024-304797553|chr1:304820843-304822633	0	0	0	1	2	3	0	0	0	0	0	0	0	0	0	120.351	233.274	351.213	0	0	0	0	0	0	-3.73456	0.0480262	0.480548	0	1	1	3.73456	0.062359	0.383942	0	1	1
circABL1_4	chr1	304822633	304823214	+	2	ENSSSCT00000006275.2	ABL1	9,10	chr1:304820843-304822633|chr1:304823214-304825989	0	1	3	21	9	5	5	10	0	1	1	0	0	317.991	453.383	2527.38	1049.73	585.355	387.276	1213.65	0	284.243	290.72	0	-2.20607	0.0240619	0.426749	-0.856785	0.403444	0.771131	2.79749	0.0100595	0.206256	1.4482	0.208394	0.611265
circABL2	chr9	132682310	132683940	-	2	ENSSSCT00000027500.1	ABL2	6,5	chr9:132681119-132682310|chr9:132683940-132687079	0	0	0	1	0	1	1	3	0	3	0	0	0	0	0	120.351	0	117.071	77.4553	364.096	0	852.728	0	0	-2.35805	0.243762	0.651868	-3.10531	0.137216	0.597919	-1.60485	0.337973	0.616461	-0.857586	0.595766	0.828766
circABLIM1	chr14	135894354	135917823	-	8	ENSSSCT00000011650.2	ABLIM1	20,19,18,17,16,15,14,13	chr14:135893020-135894354|chr14:135917823-135918828	0	1	3	0	0	2	0	0	0	0	0	0	0	317.991	453.383	0	0	234.142	0	0	0	0	0	0	1.55227	0.432008	0.762693	3.90053	0.0486139	0.441573	2.34826	0.301171	0.586236	0	1	1
circABLIM1_2	chr14	136012793	136046886	-	3	ENSSSCT00000011650.2	ABLIM1	5,4,3	chr14:135992563-136012793|chr14:136046886-136133370	0	0	2	0	0	0	2	0	0	0	0	0	0	0	302.256	0	0	0	154.911	0	0	0	0	0	2.80702	0.165472	0.622196	0.83243	0.71085	0.94656	0	1	1	1.97459	0.381741	0.709467
circABLIM2	chr8	4258669	4260865	+	2	ENSSSCT00000009541.2	ABLIM2	11,12	chr8:4251469-4258669|chr8:4260865-4262535	11	8	57	106	188	80	292	427	369	43	56	40	3149.48	2543.93	8614.28	12757.2	21927.8	9365.69	22616.9	51823	49037.9	12222.4	16280.3	9690.47	-1.50195	5.66898e-06	0.00950121	-2.98287	2.53859e-19	2.83645e-16	0.21188	0.493432	0.708072	1.6928	3.60283e-08	4.02557e-05
circABLIM2_2	chr8	4251391	4260865	+	3	ENSSSCT00000009541.2	ABLIM2	10,11,12	chr8:4250013-4251391|chr8:4260865-4262535	0	1	0	9	11	0	2	0	4	0	0	0	0	317.991	0	1083.16	1283.01	0	154.911	0	531.576	0	0	0	-2.94651	0.0710166	0.52478	-1.20772	0.466479	0.804873	5.40024	0.0101528	0.206256	3.66145	0.0891152	0.533236
circABLIM2_3	chr8	4230306	4244950	+	4	ENSSSCT00000009541.2	ABLIM2	5,6,7,8	chr8:4223524-4230306|chr8:4244950-4249956	0	0	0	5	4	0	0	0	1	0	0	1	0	0	0	601.756	466.549	0	0	0	132.894	0	0	242.262	-4.29262	0.0380619	0.45914	-1.59327	0.392468	0.765683	1.81832	0.283041	0.57113	-0.881034	0.615934	0.843378
circACACA	chr12	40342411	40345546	-	2	ENSSSCT00000019259.2	ACACA	13,12	chr12:40341098-40342411|chr12:40345546-40346105	0	0	0	0	2	0	3	0	0	0	0	0	0	0	0	0	233.274	0	232.366	0	0	0	0	0	-2.34234	0.395883	0.746343	-2.37044	0.390213	0.765683	2.34234	0.413775	0.671472	2.37044	0.407997	0.729046
circACACB	chr14	44169276	44175988	-	6	ENSSSCT00000010889.2	ACACB	45,44,43,42,41,40	chr14:44167394-44169276|chr14:44175988-44177119	5	13	15	14	33	41	54	45	29	8	9	2	1431.58	4133.88	2266.92	1684.92	3849.03	4799.91	4182.58	5461.44	3853.93	2273.94	2616.48	484.524	-0.428216	0.40392	0.750104	-0.809105	0.110243	0.562804	0.970654	0.0758003	0.397004	1.35154	0.0122363	0.317955
circACACB_2	chr14	44171730	44175988	-	4	ENSSSCT00000010889.2	ACACB	43,42,41,40	chr14:44170488-44171730|chr14:44175988-44177119	0	0	0	0	1	1	1	1	0	0	0	0	0	0	0	0	116.637	117.071	77.4553	121.365	0	0	0	0	-2.34574	0.306998	0.700533	-2.17408	0.330286	0.719843	2.34574	0.330956	0.613788	2.17408	0.355092	0.681666
circACACB_3	chr14	44201887	44204705	-	2	ENSSSCT00000010889.2	ACACB	23,22	chr14:44201097-44201887|chr14:44204705-44205367	3	1	1	0	1	4	2	0	3	0	0	0	858.949	317.991	151.128	0	116.637	468.284	154.911	0	398.682	0	0	0	1.02904	0.42752	0.762693	1.13885	0.379503	0.763561	3.4897	0.0927681	0.427909	3.3799	0.10364	0.552306
circACACB_4	chr14	44212455	44214448	-	3	ENSSSCT00000010889.2	ACACB	17,16,15	chr14:44210125-44212455|chr14:44214448-44215361	0	0	0	0	0	0	1	4	1	0	0	0	0	0	0	0	0	0	77.4553	485.461	132.894	0	0	0	0	1	1	-3.68894	0.0829751	0.525771	0	1	1	3.68894	0.0988305	0.544868
circACADL	chr15	124776530	124779242	-	3	ENSSSCT00000017589.2	ACADL	8,7,6	chr15:124768202-124776530|chr15:124779242-124782327	1	0	1	0	4	3	1	1	1	0	0	0	286.316	0	151.128	0	466.549	351.213	77.4553	121.365	132.894	0	0	0	-0.792267	0.524098	0.832625	0.427149	0.748362	0.964755	3.93782	0.0419501	0.337211	2.7184	0.177824	0.603178
circACADL_2	chr15	124776530	124789687	-	7	ENSSSCT00000017589.2	ACADL	8,7,6,5,4,3,2	chr15:124768202-124776530|chr15:124789687-124793041	0	0	1	2	4	3	1	0	1	0	0	0	0	0	151.128	240.703	466.549	351.213	77.4553	0	132.894	0	0	0	-1.99609	0.0896852	0.562327	0.0731796	0.957521	1	4.28515	0.0137818	0.22716	2.21588	0.256751	0.647009
circACADL_3	chr15	124782327	124789687	-	4	ENSSSCT00000017589.2	ACADL	5,4,3,2	chr15:124779242-124782327|chr15:124789687-124793041	0	0	1	2	2	1	0	0	1	0	0	0	0	0	151.128	240.703	233.274	117.071	0	0	132.894	0	0	0	-1.22772	0.362593	0.737238	0.744276	0.624875	0.900204	3.4969	0.0687363	0.392775	1.52491	0.419221	0.729046
circACADM	chr6	127528134	127528907	-	2	ENSSSCT00000004179.2	ACADM	10,9	chr6:127516585-127528134|chr6:127528907-127530498	0	0	0	1	2	3	8	0	4	1	1	0	0	0	0	120.351	233.274	351.213	619.642	0	531.576	284.243	290.72	0	-3.73484	0.0441778	0.471605	-4.43463	0.0130297	0.305423	0.330114	0.797307	0.955856	1.0299	0.400673	0.724019
circACADM_2	chr6	127528134	127534257	-	4	ENSSSCT00000004179.2	ACADM	10,9,8,7	chr6:127516585-127528134|chr6:127534257-127538812	0	0	0	5	0	4	0	3	3	0	0	0	0	0	0	601.756	0	468.284	0	364.096	398.682	0	0	0	-4.29452	0.0409838	0.463453	-3.78383	0.0716072	0.496845	4.29452	0.0507095	0.358604	3.78383	0.0864153	0.529071
circACADM_3	chr6	127528134	127539627	-	6	ENSSSCT00000004179.2	ACADM	10,9,8,7,6,5	chr6:127516585-127528134|chr6:127539627-127540461	2	4	4	4	5	0	3	2	6	0	0	0	572.633	1271.96	604.511	481.405	583.186	0	232.366	242.731	797.364	0	0	0	1.11186	0.230826	0.651868	0.921224	0.312359	0.708347	4.28796	0.0212394	0.26455	4.47859	0.0145991	0.324081
circACADM_4	chr6	127534126	127543923	-	6	ENSSSCT00000004179.2	ACADM	7,6,5,4,3,2	chr6:127530607-127534126|chr6:127543923-127547907	0	0	0	0	2	3	2	0	0	1	0	2	0	0	0	0	233.274	351.213	154.911	0	0	284.243	0	484.524	-3.48903	0.0760686	0.539074	-2.09269	0.264802	0.683349	-0.399155	0.770501	0.930667	-1.79549	0.219706	0.617332
circACAT1	chr9	40614115	40617293	+	3	ENSSSCT00000028484.1	ACAT1	7,8,9	chr9:40613454-40614115|chr9:40617293-40619139	2	0	2	3	2	3	4	3	3	0	2	0	572.633	0	302.256	361.054	233.274	351.213	309.821	364.096	398.682	0	581.441	0	-0.0594908	0.946329	1	-0.206458	0.809247	0.993625	0.73789	0.47967	0.697853	0.884857	0.383048	0.709467
circACBD5	chr10	54218224	54223208	-	3	ENSSSCT00000012108.2	ACBD5	5,4,3	chr10:54213906-54218224|chr10:54223208-54227075	2	2	4	1	2	2	5	3	2	0	0	2	572.633	635.982	604.511	120.351	233.274	234.142	387.276	364.096	265.788	0	0	484.524	1.52939	0.0558938	0.498382	0.764709	0.281351	0.693863	0.117048	0.916436	1	0.881732	0.377043	0.704879
circACIN1	chr7	81291704	81292346	+	2	ENSSSCT00000002276.2	ACIN1	3,4	chr7:81288749-81291704|chr7:81292346-81302569	0	0	3	1	0	0	2	1	2	0	0	0	0	0	453.383	120.351	0	0	154.911	121.365	265.788	0	0	0	1.9021	0.181189	0.639654	0.157026	0.892008	1	1.61583	0.403931	0.668872	3.3609	0.094129	0.537871
circACOX1	chr12	5475166	5477978	-	6	ENSSSCT00000018723.2	ACOX1	12,11,10,9,8,7	chr12:5472472-5475166|chr12:5477978-5479392	0	0	0	4	3	2	4	0	0	1	0	0	0	0	0	481.405	349.911	234.142	309.821	0	0	284.243	0	0	-4.28907	0.0203306	0.397969	-2.89431	0.12563	0.583388	1.76203	0.221518	0.542783	0.367269	0.803361	0.97603
circACOX1_2	chr12	5476778	5477978	-	2	ENSSSCT00000018723.2	ACOX1	8,7	chr12:5476208-5476778|chr12:5477978-5479392	0	0	1	1	1	4	5	1	3	0	1	0	0	0	151.128	120.351	116.637	468.284	387.276	121.365	398.682	0	290.72	0	-1.47335	0.27226	0.667487	-1.83301	0.155355	0.612742	1.21144	0.37551	0.641871	1.5711	0.232273	0.627886
circACSL1	chr15	52536903	52541936	-	3	ENSSSCT00000017187.2	ACSL1	13,12,11	chr15:52535842-52536903|chr15:52541936-52544452	1	1	3	3	15	7	4	1	0	1	0	0	286.316	317.991	453.383	361.054	1749.56	819.498	309.821	121.365	0	284.243	0	0	-1.36467	0.131592	0.602346	1.08509	0.301107	0.702374	3.18316	0.00740096	0.185805	0.733406	0.598797	0.83147
circACSL3	chr15	138689555	138692131	+	2	ENSSSCT00000017665.1	ACSL3	3,4	chr15:138681538-138689555|chr15:138692131-138693173	0	0	0	0	0	0	1	0	0	0	0	0	0	0	0	0	0	0	77.4553	0	0	0	0	0	0	1	1	-1.30103	0.499933	0.812694	0	1	1	1.30103	0.523585	0.774081
circACSS3	chr5	105210065	105250420	-	4	ENSSSCT00000001027.2	ACSS3	14,13,12,11	chr5:105198927-105210065|chr5:105250420-105265059	1	1	4	0	5	0	5	2	1	1	0	1	286.316	317.991	604.511	0	583.186	0	387.276	242.731	132.894	284.243	0	242.262	1.05832	0.336729	0.718011	0.653905	0.536578	0.844418	0.114955	0.929689	1	0.519371	0.677064	0.897043
circACSS3_2	chr5	105210065	105265163	-	5	ENSSSCT00000001027.2	ACSS3	14,13,12,11,10	chr5:105198927-105210065|chr5:105265163-105276875	0	0	2	1	0	1	0	0	0	1	0	0	0	0	302.256	120.351	0	117.071	0	0	0	284.243	0	0	0.531611	0.762556	0.959133	2.89018	0.0965763	0.552014	-0.183592	0.925998	1	-2.54216	0.151767	0.584737
circACSS3_3	chr5	105210065	105277027	-	6	ENSSSCT00000001027.2	ACSS3	14,13,12,11,10,9	chr5:105198927-105210065|chr5:105277027-105296612	0	0	2	0	1	0	0	0	0	0	0	0	0	0	302.256	0	116.637	0	0	0	0	0	0	0	1.1933	0.606281	0.891731	2.79771	0.164215	0.621111	1.60442	0.458497	0.689495	0	1	1
circACTG1	chr12	1163686	1164055	+	1	ENSSSCT00000025260.1	ACTG1	2	chr12:1163311-1163686|chr12:1164055-1164345	0	0	0	0	0	3	0	0	0	0	0	0	0	0	0	0	0	351.213	0	0	0	0	0	0	-2.83389	0.255036	0.651868	0	1	1	2.83389	0.275588	0.564331	0	1	1
circACTN2	chr14	58648900	58650042	-	2	ENSSSCT00000011106.2	ACTN2	20,19	chr14:58647203-58648900|chr14:58650042-58653122	0	0	0	0	2	1	2	4	1	1	0	0	0	0	0	0	233.274	117.071	154.911	485.461	132.894	284.243	0	0	-2.83787	0.133834	0.602346	-3.8266	0.0364414	0.41851	0.31314	0.83642	0.980582	1.30187	0.358072	0.684938
circACTN2_2	chr14	58653122	58658405	-	4	ENSSSCT00000011106.2	ACTN2	18,17,16,15	chr14:58650042-58653122|chr14:58658405-58660230	0	0	2	1	1	1	0	1	0	2	0	0	0	0	302.256	120.351	116.637	117.071	0	121.365	0	568.485	0	0	0.168085	0.89819	1	1.46983	0.325464	0.715292	-0.562814	0.695181	0.874686	-1.86456	0.226398	0.622037
circACTN2_3	chr14	58671311	58674808	-	3	ENSSSCT00000011106.2	ACTN2	10,9,8	chr14:58668404-58671311|chr14:58674808-58678962	0	0	0	0	0	0	1	0	0	0	2	0	0	0	0	0	0	0	77.4553	0	0	0	581.441	0	0	1	1	-1.3257	0.472637	0.804873	-3.45505	0.119343	0.460342	-2.12935	0.370134	0.697564
circACTN2_4	chr14	58678962	58684284	-	3	ENSSSCT00000011106.2	ACTN2	7,6,5	chr14:58674808-58678962|chr14:58684284-58689180	4	10	14	19	18	26	23	11	7	2	4	1	1145.27	3179.91	2115.79	2286.67	2099.47	3043.85	1781.47	1335.02	930.259	568.485	1162.88	242.262	-0.220711	0.634622	0.913974	0.607509	0.211895	0.656555	1.93036	0.00122393	0.0783871	1.10214	0.081229	0.519735
circACTN2_5	chr14	58678962	58691135	-	6	ENSSSCT00000011106.2	ACTN2	7,6,5,4,3,2	chr14:58674808-58678962|chr14:58691135-58716974	0	0	6	1	0	8	3	1	0	0	1	1	0	0	906.767	120.351	0	936.569	232.366	121.365	0	0	290.72	242.262	0.000224003	0.996241	1	1.35523	0.339798	0.729662	0.907313	0.552135	0.762881	-0.447693	0.777838	0.962108
circACTN2_6	chr14	58689180	58691135	-	3	ENSSSCT00000011106.2	ACTN2	4,3,2	chr14:58684284-58689180|chr14:58691135-58716974	0	2	4	2	2	11	3	3	1	0	0	0	0	635.982	604.511	240.703	233.274	1287.78	232.366	364.096	132.894	0	0	0	-0.42886	0.670262	0.934577	0.777864	0.463934	0.804088	4.98889	0.00603702	0.171444	3.78217	0.0520037	0.473818
circACTN4	chr6	43104130	43107089	+	4	ENSSSCT00000003289.2	ACTN4	5,6,7,8	chr6:43103356-43104130|chr6:43107089-43111417	0	0	0	0	1	0	3	0	4	2	0	0	0	0	0	0	116.637	0	232.366	0	531.576	568.485	0	0	-1.60741	0.389745	0.74499	-3.82535	0.0733171	0.497488	-1.81092	0.312831	0.599331	0.407015	0.807044	0.979883
circACVR1	chr15	71690219	71709108	-	3	ENSSSCT00000017285.2	ACVR1	8,7,6	chr15:71682740-71690219|chr15:71709108-71715507	0	0	1	3	3	1	2	2	0	0	0	1	0	0	151.128	361.054	349.911	117.071	154.911	242.731	0	0	0	242.262	-1.67492	0.193477	0.649073	-0.767067	0.578683	0.873759	1.44106	0.273272	0.564331	0.533208	0.705135	0.91365
circACVR1_2	chr15	71690219	71727032	-	7	ENSSSCT00000017285.2	ACVR1	8,7,6,5,4,3,2	chr15:71682740-71690219|chr15:71727032-71745334	0	0	2	2	2	1	1	0	0	0	1	0	0	0	302.256	240.703	233.274	117.071	77.4553	0	0	0	290.72	0	-0.419452	0.731132	0.949643	1.6109	0.252807	0.678469	0.973095	0.482833	0.700025	-1.05726	0.513501	0.773597
circACVR1_3	chr15	71703523	71709108	-	2	ENSSSCT00000017285.2	ACVR1	7,6	chr15:71690350-71703523|chr15:71709108-71715507	1	1	0	1	0	1	5	2	0	0	2	0	286.316	317.991	0	120.351	0	117.071	387.276	242.731	0	0	581.441	0	0.952749	0.530194	0.835547	-0.351855	0.79017	0.986094	-1.05932	0.482142	0.699372	0.245281	0.855078	1
circACVR1_4	chr15	71703523	71727032	-	6	ENSSSCT00000017285.2	ACVR1	7,6,5,4,3,2	chr15:71690350-71703523|chr15:71727032-71745334	6	4	3	1	2	7	0	1	4	0	1	1	1717.9	1271.96	453.383	120.351	233.274	819.498	0	121.365	531.576	0	290.72	242.262	1.44047	0.125168	0.602346	2.3869	0.0175095	0.334849	1.04785	0.384809	0.653435	0.101423	0.94178	1
circADAM17	chr3	135116467	135117428	+	2	ENSSSCT00000009453.2	ADAM17	16,17	chr3:135115009-135116467|chr3:135117428-135118452	2	2	11	5	9	10	21	16	6	0	3	5	572.633	635.982	1662.41	601.756	1049.73	1170.71	1626.56	1941.85	797.364	0	872.161	1211.31	0.158916	0.806249	0.981603	-0.472591	0.448747	0.792457	0.392088	0.587269	0.795686	1.02359	0.13726	0.576499
circADAM19	chr16	71618181	71624219	+	3	ENSSSCT00000018565.2	ADAM19	6,7,8	chr16:71608938-71618181|chr16:71624219-71627714	0	0	2	2	3	2	2	0	0	0	0	0	0	0	302.256	240.703	349.911	234.142	154.911	0	0	0	0	0	-0.877415	0.461311	0.782548	0.915183	0.495365	0.812411	3.94377	0.0371927	0.327217	2.15117	0.273554	0.651471
circADAMTS20	chr5	77416253	77417501	-	2	ENSSSCT00000000861.2	ADAMTS20	9,8	chr5:77414954-77416253|chr5:77417501-77418240	0	0	5	0	0	0	1	0	0	2	0	0	0	0	755.639	0	0	0	77.4553	0	0	568.485	0	0	3.93629	0.0694212	0.52478	2.59916	0.237431	0.674014	-3.4306	0.105215	0.450423	-2.09347	0.347018	0.679442
circADAMTS6	chr16	47050900	47053530	-	3	ENSSSCT00000018451.2	ADAMTS6	15,14,13	chr16:47041968-47050900|chr16:47053530-47059952	0	0	0	0	0	0	0	3	0	0	0	0	0	0	0	0	0	0	0	364.096	0	0	0	0	0	1	1	-2.85736	0.252019	0.677695	0	1	1	2.85736	0.272496	0.651471
circADAT1	chr6	11926254	11926858	+	1	ENSSSCT00000003000.2	ADAT1	6	chr6:11922639-11926254|chr6:11926858-11928923	0	2	6	5	4	4	0	1	2	1	0	0	0	635.982	906.767	601.756	466.549	468.284	0	121.365	265.788	284.243	0	0	0.145687	0.85788	1	2.18605	0.0263959	0.374323	2.27457	0.0611198	0.383942	0.234204	0.875456	1
circADCY2	chr16	80461745	80476071	-	4	ENSSSCT00000018619.2	ADCY2	11,10,9,8	chr16:80442903-80461745|chr16:80476071-80480205	3	4	9	5	2	3	7	5	1	0	0	1	858.949	1271.96	1360.15	601.756	233.274	351.213	542.187	606.827	132.894	0	0	242.262	1.54944	0.0205275	0.397969	1.38003	0.0324881	0.407051	1.92259	0.105763	0.451499	2.092	0.0697829	0.506723
circADD1	chr8	1248424	1257008	+	3	ENSSSCT00000009510.2	ADD1	2,3,4	chr8:1209185-1248424|chr8:1257008-1266331	0	1	3	2	0	0	0	0	2	0	0	0	0	317.991	453.383	240.703	0	0	0	0	265.788	0	0	0	1.54392	0.387568	0.743944	1.51218	0.394856	0.767598	2.36823	0.283709	0.57113	2.39997	0.281257	0.651471
circADPRM	chr12	58063003	58064595	+	2	ENSSSCT00000019603.2	ADPRM	1,2	None|chr12:58064595-58074588	1	7	7	6	7	13	10	1	2	2	2	1	286.316	2225.94	1057.89	722.108	816.46	1521.92	774.553	121.365	265.788	568.485	581.441	242.262	0.176512	0.795462	0.974793	1.4115	0.0536058	0.455038	1.1358	0.161094	0.505226	-0.0991919	0.912196	1
circAEBP2	chr5	56916165	56964141	-	7	ENSSSCT00000000632.2	AEBP2	9,8,7,6,5,4,3	chr5:56915591-56916165|chr5:56964141-56986373	0	1	1	5	2	1	3	0	4	0	0	0	0	317.991	151.128	601.756	233.274	117.071	232.366	0	531.576	0	0	0	-0.971573	0.447365	0.770194	-0.651242	0.614882	0.896513	4.13242	0.0343713	0.316735	3.81209	0.0539125	0.473818
circAEBP2_2	chr5	56928607	56955103	-	3	ENSSSCT00000000632.2	AEBP2	6,5,4	chr5:56920994-56928607|chr5:56955103-56963933	0	0	1	3	6	3	3	1	1	1	1	5	0	0	151.128	361.054	699.823	351.213	232.366	121.365	132.894	284.243	290.72	1211.31	-2.40205	0.0400807	0.463021	-1.03702	0.431757	0.783793	-0.383922	0.635888	0.832291	-1.74896	0.055081	0.473818
circAEBP2_3	chr5	56933126	56964141	-	3	ENSSSCT00000000632.2	AEBP2	5,4,3	chr5:56928732-56933126|chr5:56964141-56986373	0	0	0	0	1	1	3	1	2	0	0	0	0	0	0	0	116.637	117.071	232.366	121.365	265.788	0	0	0	-2.35328	0.200775	0.649073	-3.57287	0.0392327	0.430059	2.35328	0.233999	0.555006	3.57287	0.0547284	0.473818
circAEBP2_4	chr5	56954995	56964141	-	2	ENSSSCT00000000632.2	AEBP2	4,3	chr5:56933313-56954995|chr5:56964141-56986373	6	2	2	2	6	10	8	3	0	0	1	0	1717.9	635.982	302.256	240.703	699.823	1170.71	619.642	364.096	0	0	290.72	0	0.236801	0.787953	0.971794	1.19984	0.189435	0.639087	2.71693	0.0304625	0.3039	1.75389	0.184558	0.606621
circAFDN	chr1	2805467	2814551	-	4	ENSSSCT00000004443.2	AFDN	5,4,3,2	chr1:2790071-2805467|chr1:2814551-2815302	3	2	3	1	2	10	4	1	5	0	3	0	858.949	635.982	453.383	120.351	233.274	1170.71	309.821	121.365	664.47	0	872.161	0	0.297107	0.759412	0.959133	0.783554	0.428249	0.783793	0.835939	0.450018	0.688481	0.349492	0.757583	0.949195
circAFDN_2	chr1	2808656	2814551	-	3	ENSSSCT00000004443.2	AFDN	4,3,2	chr1:2805628-2808656|chr1:2814551-2815302	0	0	0	0	0	1	2	0	0	1	0	0	0	0	0	0	0	117.071	154.911	0	0	284.243	0	0	-1.60708	0.42602	0.762693	-1.97651	0.353654	0.738596	-0.945632	0.686211	0.867992	-0.576196	0.810101	0.979883
circAFF2	chrX	138419389	138429023	+	2	ENSSSCT00000013917.3	AFF2	2,3	chrX:138261212-138419389|chrX:138429023-138554242	0	0	2	4	3	2	4	0	0	1	0	0	0	0	302.256	481.405	349.911	234.142	309.821	0	0	284.243	0	0	-1.25994	0.318408	0.704982	0.125942	0.92481	1	1.76287	0.213219	0.541331	0.376982	0.79626	0.972894
circAFF2_2	chrX	138428177	138429023	+	1	ENSSSCT00000013917.3	AFF2	3	chrX:138419522-138428177|chrX:138429023-138554242	0	0	4	9	8	0	3	1	1	0	1	1	0	0	604.511	1083.16	933.097	0	232.366	121.365	132.894	0	290.72	242.262	-1.33193	0.261352	0.654173	0.55512	0.654218	0.918316	1.79781	0.165445	0.505997	-0.0892347	0.949843	1
circAFF4	chr2	140760853	140772947	-	5	ENSSSCT00000025744.1	AFF4	6,5,4,3,2	chr2:140696941-140760853|chr2:140772947-140803856	0	0	2	0	5	0	4	5	1	0	0	0	0	0	302.256	0	583.186	0	309.821	606.827	132.894	0	0	0	-0.544954	0.736412	0.950502	-1.33046	0.396182	0.767632	3.48585	0.11005	0.451689	4.27136	0.0489574	0.468969
circAFG3L2	chr6	90827572	90833719	-	4	ENSSSCT00000025900.1	AFG3L2	4,3,2,1	chr6:90826645-90827572|None	0	1	0	0	3	0	2	0	1	0	0	1	0	317.991	0	0	349.911	0	154.911	0	132.894	0	0	242.262	-0.344978	0.842889	0.996861	-0.135886	0.93015	1	0.365879	0.844371	0.985265	0.156787	0.932227	1
circAFTPH	chr3	81212630	81219219	-	4	ENSSSCT00000022299.1	AFTPH	5,4,3,2	chr3:81207000-81212630|chr3:81219219-81229856	0	0	0	1	0	0	2	1	2	0	0	0	0	0	0	120.351	0	0	154.911	121.365	265.788	0	0	0	-1.61426	0.365492	0.738695	-3.35399	0.0641384	0.476373	1.61426	0.399828	0.666549	3.35399	0.0836218	0.525892
circAFTPH_2	chr3	81216720	81219219	-	3	ENSSSCT00000022299.1	AFTPH	4,3,2	chr3:81212753-81216720|chr3:81219219-81229856	0	0	0	0	0	3	1	4	0	1	1	0	0	0	0	0	0	351.213	77.4553	485.461	0	284.243	290.72	0	-2.83591	0.175867	0.633879	-3.41702	0.109484	0.562804	-0.590839	0.734162	0.900773	-0.00972942	0.995646	1
circAGBL3	chr18	15020214	15034759	-	8	ENSSSCT00000017997.2	AGBL3	11,10,9,8,7,6,5,4	chr18:15010754-15020214|chr18:15034759-15051565	0	0	1	0	1	8	5	0	0	1	2	0	0	0	151.128	0	116.637	936.569	387.276	0	0	284.243	581.441	0	-2.1183	0.229049	0.651868	-0.921741	0.598713	0.88761	0.301997	0.847763	0.98666	-0.89456	0.579861	0.817479
circAGBL3_2	chr18	15020214	15051751	-	9	ENSSSCT00000017997.2	AGBL3	11,10,9,8,7,6,5,4,3	chr18:15010754-15020214|chr18:15051751-15067558	0	0	1	0	4	6	1	0	0	1	1	1	0	0	151.128	0	466.549	702.427	77.4553	0	0	284.243	290.72	242.262	-2.19153	0.118791	0.599738	0.789332	0.625038	0.900204	0.497789	0.677804	0.861912	-2.48307	0.0857723	0.528409
circAGBL3_3	chr18	15051565	15067619	-	2	ENSSSCT00000017997.2	AGBL3	3,2	chr18:15034759-15051565|chr18:15067619-15069062	0	0	0	0	0	1	1	0	3	0	2	0	0	0	0	0	0	117.071	77.4553	0	398.682	0	581.441	0	-1.60833	0.398363	0.747099	-3.1782	0.149762	0.607964	-1.83212	0.341988	0.616461	-0.262253	0.887132	1
circAGGF1	chr2	87512162	87517930	+	4	ENSSSCT00000015395.2	AGGF1	2,3,4,5	chr2:87507537-87512162|chr2:87517930-87533402	1	1	6	14	7	7	16	8	3	1	1	2	286.316	317.991	906.767	1684.92	816.46	819.498	1239.28	970.923	398.682	284.243	290.72	484.524	-0.914532	0.181685	0.639716	-0.630001	0.362075	0.745958	1.56854	0.0462405	0.345713	1.28401	0.107352	0.56025
circAGL	chr4	129774516	129792899	-	11	ENSSSCT00000007525.2	ENSSSCG00000006872.2	28,27,26,25,24,23,22,21,20,19,18	chr4:129763418-129774516|chr4:129792899-129796719	19	1	54	64	103	54	168	81	89	56	54	34	5440.01	317.991	8160.9	7702.48	12013.6	6321.84	13012.5	9830.59	11827.6	15917.6	15698.9	8236.9	-0.787299	0.0258533	0.435479	-1.20234	0.000580869	0.049925	-0.604971	0.0687576	0.392775	-0.18993	0.561844	0.80483
circAGL_2	chr4	129789460	129792899	-	4	ENSSSCT00000007525.2	ENSSSCG00000006872.2	21,20,19,18	chr4:129785893-129789460|chr4:129792899-129796719	0	2	5	33	39	30	155	3	39	40	23	21	0	635.982	755.639	3971.59	4548.85	3512.13	12005.6	364.096	5182.87	11369.7	6686.57	5087.5	-2.96304	0.000505075	0.140868	-3.5171	3.72715e-05	0.00657548	-0.937972	0.179876	0.508992	-0.383907	0.577696	0.81603
circAGL_3	chr4	129763282	129792899	-	12	ENSSSCT00000007525.2	ENSSSCG00000006872.2	29,28,27,26,25,24,23,22,21,20,19,18	chr4:129761990-129763282|chr4:129792899-129796719	0	0	1	1	4	3	3	4	5	2	3	1	0	0	151.128	120.351	466.549	351.213	232.366	485.461	664.47	568.485	872.161	242.262	-1.84167	0.13334	0.602346	-2.29102	0.0496603	0.442154	-0.762292	0.381443	0.648705	-0.312938	0.704482	0.91351
circAGL_4	chr4	129779802	129789591	-	6	ENSSSCT00000007525.2	ENSSSCG00000006872.2	26,25,24,23,22,21	chr4:129776033-129779802|chr4:129789591-129792320	0	0	0	0	1	2	3	1	4	0	0	2	0	0	0	0	116.637	234.142	232.366	121.365	531.576	0	0	484.524	-2.83797	0.137109	0.602346	-4.00667	0.0297484	0.391471	-0.507603	0.71261	0.884692	0.661093	0.606924	0.838126
circAGL_5	chr4	129779802	129792899	-	9	ENSSSCT00000007525.2	ENSSSCG00000006872.2	26,25,24,23,22,21,20,19,18	chr4:129776033-129779802|chr4:129792899-129796719	1	0	4	0	5	4	9	7	3	1	2	0	286.316	0	604.511	0	583.186	468.284	697.097	849.557	398.682	284.243	581.441	0	0.000855486	0.996673	1	-0.856932	0.336769	0.726238	0.339537	0.745591	0.909741	1.19733	0.221091	0.617332
circAGL_6	chr4	129785352	129792899	-	6	ENSSSCT00000007525.2	ENSSSCG00000006872.2	23,22,21,20,19,18	chr4:129783231-129785352|chr4:129792899-129796719	1	0	0	1	0	2	5	0	0	0	2	3	286.316	0	0	120.351	0	234.142	387.276	0	0	0	581.441	726.785	-0.429853	0.793183	0.974382	-0.694121	0.662374	0.925116	-1.74684	0.227108	0.550047	-1.48258	0.29037	0.653682
circAGO4	chr6	85269338	85273122	+	5	ENSSSCT00000004025.2	AGO4	3,4,5,6,7	chr6:85261964-85269338|chr6:85273122-85275332	2	2	3	4	10	3	0	0	0	0	0	1	572.633	635.982	453.383	481.405	1166.37	351.213	0	0	0	0	0	242.262	-0.299088	0.727037	0.949643	4.86654	0.000315033	0.0329997	2.6626	0.0276056	0.298496	-2.50302	0.117298	0.572872
circAGO4_2	chr6	85261798	85284732	+	14	ENSSSCT00000004025.2	AGO4	2,3,4,5,6,7,8,9,10,11,12,13,14,15	chr6:85255853-85261798|chr6:85284732-85292781	0	0	5	2	5	4	1	0	4	3	0	0	0	0	755.639	240.703	583.186	468.284	77.4553	0	531.576	852.728	0	0	-0.465552	0.712993	0.948018	0.628808	0.621918	0.900204	0.603643	0.647579	0.840083	-0.490717	0.720423	0.925587
circAGO4_3	chr6	85279238	85284732	+	3	ENSSSCT00000004025.2	AGO4	13,14,15	chr6:85277922-85279238|chr6:85284732-85292781	2	1	0	0	0	0	0	0	0	0	0	0	572.633	317.991	0	0	0	0	0	0	0	0	0	0	3.99664	0.0754655	0.537071	3.99664	0.0696769	0.494824	0	1	1	0	1	1
circAGPS	chr15	92653933	92657618	+	4	ENSSSCT00000030764.1	AGPS	3,4,5,6	chr15:92643606-92653933|chr15:92657618-92662184	0	0	1	4	1	0	2	3	0	0	0	0	0	0	151.128	481.405	116.637	0	154.911	364.096	0	0	0	0	-1.32465	0.427713	0.762693	-1.15293	0.489561	0.811421	3.50789	0.102449	0.44311	3.33617	0.119137	0.572872
circAGPS_2	chr15	92710906	92725270	+	5	ENSSSCT00000030764.1	AGPS	16,17,18,19,20	chr15:92704735-92710906|chr15:92725270-92831030	1	2	1	2	3	2	4	0	0	0	0	0	286.316	635.982	151.128	240.703	349.911	234.142	309.821	0	0	0	0	0	0.212508	0.84696	0.997892	1.22497	0.289729	0.698687	3.9437	0.0389702	0.33183	2.93124	0.137761	0.576499
circAHCTF1	chr10	17371571	17380026	+	3	ENSSSCT00000011885.2	AHCTF1	2,3,4	chr10:17369770-17371571|chr10:17380026-17381794	0	0	0	3	0	1	0	0	0	0	0	0	0	0	0	361.054	0	117.071	0	0	0	0	0	0	-3.22004	0.197067	0.649073	0	1	1	3.22004	0.215852	0.541331	0	1	1
circAHCTF1_2	chr10	17413836	17414423	+	2	ENSSSCT00000011885.2	AHCTF1	25,26	chr10:17413151-17413836|chr10:17414423-17417954	2	0	2	0	0	2	3	2	3	0	0	0	572.633	0	302.256	0	0	234.142	232.366	242.731	398.682	0	0	0	1.70753	0.155099	0.622196	0.0713667	0.943301	1	2.35267	0.239556	0.559503	3.98884	0.0325331	0.437955
circAIDA	chr10	13600748	13605870	-	4	ENSSSCT00000011854.2	AIDA	6,5,4,3	chr10:13592273-13600748|chr10:13605870-13614070	0	0	3	0	2	0	0	0	0	0	0	1	0	0	453.383	0	233.274	0	0	0	0	0	0	242.262	0.931952	0.695993	0.94366	3.27579	0.126815	0.583907	-0.0895897	0.969111	1	-2.43343	0.214454	0.611265
circAIDA_2	chr10	13600748	13614140	-	5	ENSSSCT00000011854.2	AIDA	6,5,4,3,2	chr10:13592273-13600748|chr10:13614140-13621018	0	1	2	2	1	1	6	0	2	0	0	1	0	317.991	302.256	240.703	116.637	117.071	464.732	0	265.788	0	0	242.262	0.434247	0.71749	0.949643	-0.224634	0.841725	1	0.709919	0.629184	0.828015	1.3688	0.3202	0.669693
circAIDA_3	chr10	13605363	13614140	-	3	ENSSSCT00000011854.2	AIDA	4,3,2	chr10:13601159-13605363|chr10:13614140-13621018	0	0	1	0	1	0	0	0	2	0	0	0	0	0	151.128	0	116.637	0	0	0	265.788	0	0	0	0.455808	0.826637	0.991728	-0.37753	0.881177	1	1.60483	0.451042	0.689204	2.43817	0.314579	0.667163
circAIFM2	chr14	78983652	78984553	-	2	ENSSSCT00000011228.2	AIFM2	5,4	chr14:78981100-78983652|chr14:78984553-78986176	0	0	1	0	1	0	1	1	3	0	0	0	0	0	151.128	0	116.637	0	77.4553	121.365	398.682	0	0	0	0.609382	0.707403	0.946593	-1.2216	0.425724	0.783793	1.60932	0.407509	0.669921	3.4403	0.0934392	0.537871
circAIMP1	chr8	123891645	123893742	-	2	ENSSSCT00000023345.1	AIMP1	3,2	chr8:123889153-123891645|chr8:123893742-123895037	0	0	0	0	0	0	2	2	1	1	1	1	0	0	0	0	0	0	154.911	242.731	132.894	284.243	290.72	242.262	0	1	1	-3.34202	0.0553024	0.458942	-3.92211	0.00845897	0.196906	-0.580089	0.574443	0.813414
circAKAP9	chr9	78693458	78702418	+	5	ENSSSCT00000016683.2	AKAP9	17,18,19,20,21	chr9:78691918-78693458|chr9:78702418-78709883	0	0	3	3	0	0	2	2	0	0	0	0	0	0	453.383	361.054	0	0	154.911	242.731	0	0	0	0	0.501406	0.774358	0.966025	0.354032	0.837214	1	2.85909	0.211371	0.541331	3.00647	0.189577	0.606976
circAKAP9_2	chr9	78740876	78745378	+	3	ENSSSCT00000016683.2	AKAP9	28,29,30	chr9:78724966-78740876|chr9:78745378-78746588	0	0	0	0	2	1	2	1	1	0	0	0	0	0	0	0	233.274	117.071	154.911	121.365	132.894	0	0	0	-2.83902	0.12659	0.602346	-3.04321	0.096833	0.552014	2.83902	0.153944	0.498604	3.04321	0.121247	0.572872
circAKAP9_3	chr9	78740876	78749748	+	6	ENSSSCT00000016683.2	AKAP9	28,29,30,31,32,33	chr9:78724966-78740876|chr9:78749748-78754518	0	0	0	6	3	4	7	4	6	2	0	1	0	0	0	722.108	349.911	468.284	542.187	485.461	797.364	568.485	0	242.262	-4.79526	0.00156719	0.210129	-5.01104	0.000635076	0.0532193	0.873887	0.32407	0.608774	1.08967	0.203449	0.609866
circAKAP9_4	chr9	78740876	78755215	+	9	ENSSSCT00000016683.2	AKAP9	28,29,30,31,32,33,34,35,36	chr9:78724966-78740876|chr9:78755215-78757285	0	0	1	2	4	1	16	5	5	1	0	0	0	0	151.128	240.703	466.549	117.071	1239.28	606.827	664.47	284.243	0	0	-1.66576	0.186799	0.646833	-3.2507	0.00261822	0.125375	1.42434	0.269781	0.564331	3.00928	0.0063428	0.259913
circAKAP9_5	chr9	78740876	78758362	+	10	ENSSSCT00000016683.2	AKAP9	28,29,30,31,32,33,34,35,36,37	chr9:78724966-78740876|chr9:78758362-78760073	0	0	1	1	0	3	2	0	3	0	4	0	0	0	151.128	120.351	0	351.213	154.911	0	398.682	0	1162.88	0	-1.03543	0.553188	0.852937	-1.2185	0.481876	0.805894	-1.17143	0.445329	0.688218	-0.988357	0.514705	0.773999
circAKAP9_6	chr9	78742153	78749748	+	5	ENSSSCT00000016683.2	AKAP9	29,30,31,32,33	chr9:78741039-78742153|chr9:78749748-78754518	0	0	2	3	0	7	13	4	1	1	1	2	0	0	302.256	361.054	0	819.498	1006.92	485.461	132.894	284.243	290.72	484.524	-1.40079	0.261903	0.654173	-1.89901	0.116051	0.571979	0.131025	0.907729	1	0.629247	0.563562	0.806568
circAKAP9_7	chr9	78754518	78758362	+	4	ENSSSCT00000016683.2	AKAP9	34,35,36,37	chr9:78749748-78754518|chr9:78758362-78760073	0	1	1	0	0	0	3	0	1	0	0	0	0	317.991	151.128	0	0	0	232.366	0	132.894	0	0	0	3.16582	0.0632393	0.523403	0.214222	0.890205	1	0	1	1	2.9516	0.160429	0.598174
circAKAP9_8	chr9	78757285	78758362	+	1	ENSSSCT00000016683.2	AKAP9	37	chr9:78755215-78757285|chr9:78758362-78760073	0	0	0	3	0	3	0	0	0	0	0	0	0	0	0	361.054	0	351.213	0	0	0	0	0	0	-3.74482	0.134254	0.602346	0	1	1	3.74482	0.149648	0.498604	0	1	1
circAKT3	chr10	18101699	18124093	+	2	ENSSSCT00000011894.2	AKT3	3,4	chr10:17976583-18101699|chr10:18124093-18140265	0	0	2	3	0	0	2	0	0	0	1	0	0	0	302.256	361.054	0	0	154.911	0	0	0	290.72	0	-0.00972125	0.996978	1	0.849048	0.666288	0.928033	0.299518	0.887005	1	-0.559251	0.796982	0.972894
circAKT3_2	chr10	18101699	18149975	+	5	ENSSSCT00000011894.2	AKT3	3,4,5,6,7	chr10:17976583-18101699|chr10:18149975-18167051	1	0	0	5	0	9	1	0	1	0	0	1	286.316	0	0	601.756	0	1053.64	77.4553	0	132.894	0	0	242.262	-2.49799	0.102137	0.581337	0.18584	0.917699	1	2.41645	0.116158	0.456463	-0.267386	0.871348	1
circAKT3_3	chr10	18101699	18168555	+	7	ENSSSCT00000011894.2	AKT3	3,4,5,6,7,8,9	chr10:17976583-18101699|chr10:18168555-18187786	0	0	3	4	2	0	1	0	0	0	0	0	0	0	453.383	481.405	233.274	0	77.4553	0	0	0	0	0	-0.354627	0.832064	0.995033	2.00512	0.24002	0.674014	3.74733	0.096113	0.435797	1.38758	0.459337	0.734227
circAKT3_4	chr10	18187786	18219757	+	4	ENSSSCT00000011894.2	AKT3	10,11,12,13	chr10:18168555-18187786|chr10:18219757-18250053	0	0	0	0	0	5	1	0	0	0	0	0	0	0	0	0	0	585.355	77.4553	0	0	0	0	0	-3.48658	0.244999	0.651868	-1.29359	0.510216	0.819475	3.48658	0.260093	0.564331	1.29359	0.532828	0.780612
circALCAM	chr13	163011610	163032003	-	11	ENSSSCT00000034028.1	ALCAM	13,12,11,10,9,8,7,6,5,4,3	chr13:162992068-163011610|chr13:163032003-163041449	0	0	1	0	0	0	2	0	0	0	0	0	0	0	151.128	0	0	0	154.911	0	0	0	0	0	2.03501	0.2753	0.668445	0.0712249	0.972596	1	0	1	1	1.96379	0.395222	0.720629
circALDH7A1	chr2	134977666	134983095	+	4	ENSSSCT00000015567.2	ALDH7A1	11,12,13,14	chr2:134976564-134977666|chr2:134983095-134985175	3	1	1	2	2	10	11	5	5	0	0	2	858.949	317.991	151.128	240.703	233.274	1170.71	852.008	606.827	664.47	0	0	484.524	-0.440722	0.6237	0.906152	-0.81232	0.351605	0.735378	1.53132	0.152863	0.498604	1.90292	0.0661477	0.500822
circALG6	chr6	137387062	137397644	-	4	ENSSSCT00000004222.2	ALG6	14,13,12,11	chr6:137379624-137387062|chr6:137397644-137399548	1	0	0	3	2	0	0	0	0	0	0	0	286.316	0	0	361.054	233.274	0	0	0	0	0	0	0	-1.03881	0.594822	0.883635	2.46498	0.165321	0.621111	3.50379	0.137332	0.487644	0	1	1
circALPK2	chr1	179850162	179856151	+	2	ENSSSCT00000005427.2	ALPK2	4,5	chr1:179810664-179850162|chr1:179856151-179860560	1	0	3	4	6	1	1	0	6	0	0	0	286.316	0	453.383	481.405	699.823	117.071	77.4553	0	797.364	0	0	0	-0.626172	0.62226	0.904517	-0.0132631	0.996682	1	4.56249	0.0234092	0.278852	3.94958	0.0548964	0.473818
circAMACR	chr16	20778453	20779782	-	2	ENSSSCT00000018315.2	AMACR	3,2	chr16:20774705-20778453|chr16:20779782-20782488	0	1	0	0	2	0	3	0	0	2	0	0	0	317.991	0	0	233.274	0	232.366	0	0	568.485	0	0	0.215593	0.929462	1	0.131345	0.963999	1	-1.08444	0.615298	0.817794	-1.00019	0.6412	0.864562
circAMBRA1	chr2	17314801	17316714	+	3	ENSSSCT00000014486.2	AMBRA1	2,3,4	chr2:17314130-17314801|chr2:17316714-17318156	1	0	1	3	0	6	0	0	0	0	0	0	286.316	0	151.128	361.054	0	702.427	0	0	0	0	0	0	-1.15013	0.45721	0.778348	3.13762	0.0621889	0.473443	4.28775	0.0467805	0.345713	0	1	1
circAMBRA1_2	chr2	17353230	17367528	+	3	ENSSSCT00000014486.2	AMBRA1	8,9,10	chr2:17349071-17353230|chr2:17367528-17421151	0	0	1	0	3	1	1	1	0	0	0	2	0	0	151.128	0	349.911	117.071	77.4553	121.365	0	0	0	484.524	-0.994119	0.535634	0.839778	0.00888151	0.988888	1	-0.133042	0.926037	1	-1.13604	0.45643	0.734227
circAMOT	chrX	106962556	106988101	-	6	ENSSSCT00000033097.1	AMOT	8,7,6,5,4,3	chrX:106954118-106962556|chrX:106988101-107004476	0	3	4	4	7	8	18	4	4	0	5	2	0	953.973	604.511	481.405	816.46	936.569	1394.19	485.461	531.576	0	1453.6	484.524	-0.496569	0.531033	0.836477	-0.666512	0.38888	0.764531	0.223874	0.777193	0.936095	0.393817	0.609863	0.840241
circAMOT_2	chrX	106978781	106988101	-	4	ENSSSCT00000033097.1	AMOT	6,5,4,3	chrX:106963638-106978781|chrX:106988101-107004476	4	4	25	15	23	26	23	16	25	0	2	3	1145.27	1271.96	3778.19	1805.27	2682.65	3043.85	1781.47	1941.85	3322.35	0	581.441	726.785	-0.171357	0.752494	0.955813	-0.0581155	0.915687	1	2.43836	0.000671978	0.0549383	2.32512	0.00124092	0.122233
circAMOT_3	chrX	106981865	106988101	-	3	ENSSSCT00000033097.1	AMOT	5,4,3	chrX:106978927-106981865|chrX:106988101-107004476	0	0	1	0	0	0	1	1	3	0	0	0	0	0	151.128	0	0	0	77.4553	121.365	398.682	0	0	0	2.19274	0.178948	0.634746	-1.26231	0.440437	0.787184	0	1	1	3.45504	0.103474	0.552302
circAMOTL1	chr9	30657641	30658578	+	1	ENSSSCT00000016321.2	AMOTL1	3	chr9:30652091-30657641|chr9:30658578-30676325	0	0	0	1	0	1	8	7	3	2	1	3	0	0	0	120.351	0	117.071	619.642	849.557	398.682	568.485	290.72	726.785	-2.35485	0.199211	0.649073	-5.07713	0.000563655	0.0497203	-2.51266	0.0143324	0.22716	0.209621	0.777818	0.962108
circAMOTL1_2	chr9	30651941	30658578	+	2	ENSSSCT00000016321.2	AMOTL1	2,3	chr9:30651703-30651941|chr9:30658578-30676325	3	0	4	3	5	3	24	11	2	1	0	6	858.949	0	604.511	361.054	583.186	351.213	1858.93	1335.02	265.788	284.243	0	1453.57	0.238165	0.791816	0.973516	-1.1773	0.157681	0.612742	-0.480075	0.594817	0.801377	0.93539	0.259791	0.647009
circAMOTL1_3	chr9	30676325	30685489	+	3	ENSSSCT00000016321.2	AMOTL1	4,5,6	chr9:30658578-30676325|chr9:30685489-30706744	5	0	10	9	16	5	10	13	0	0	2	3	1431.58	0	1511.28	1083.16	1866.19	585.355	774.553	1577.75	0	0	581.441	726.785	-0.188731	0.830978	0.994946	0.377137	0.671841	0.931277	1.36923	0.166728	0.508066	0.803365	0.423021	0.729046
circAMPD1	chr4	116072200	116078618	+	8	ENSSSCT00000007399.2	AMPD1	6,7,8,9,10,11,12,13	chr4:116068585-116072200|chr4:116078618-116079660	0	0	1	1	0	1	3	1	0	0	2	0	0	0	151.128	120.351	0	117.071	232.366	121.365	0	0	581.441	0	-0.145913	0.936232	1	-0.735139	0.639098	0.908487	-1.06058	0.485906	0.702353	-0.471359	0.74823	0.945726
circAMPD1_2	chr4	116072200	116080115	+	10	ENSSSCT00000007399.2	AMPD1	6,7,8,9,10,11,12,13,14,15	chr4:116068585-116072200|chr4:116080115-116080743	0	0	0	4	2	0	8	1	2	0	4	1	0	0	0	481.405	233.274	0	619.642	121.365	265.788	0	1162.88	242.262	-3.74501	0.0502618	0.486929	-4.26792	0.0224351	0.361006	-0.902627	0.457176	0.689477	-0.379711	0.746695	0.944186
circAMPD1_3	chr4	116077345	116078618	+	3	ENSSSCT00000007399.2	AMPD1	11,12,13	chr4:116075690-116077345|chr4:116078618-116079660	0	0	1	0	3	0	4	2	0	0	0	1	0	0	151.128	0	349.911	0	309.821	242.731	0	0	0	242.262	-0.663524	0.708704	0.947178	-1.28993	0.450098	0.792815	0.360394	0.839676	0.983077	0.986802	0.565566	0.807366
circAMZ2	chr12	12368344	12368753	-	2	ENSSSCT00000018793.2	AMZ2	5,4	chr12:12364773-12368344|chr12:12368753-12369408	1	0	0	1	4	0	0	0	0	0	0	1	286.316	0	0	120.351	466.549	0	0	0	0	0	0	242.262	-1.02338	0.603514	0.888831	2.46738	0.166607	0.623684	1.03395	0.60546	0.810392	-2.45681	0.164684	0.601565
circANGEL2	chr9	143383682	143384008	+	1	ENSSSCT00000016981.2	ANGEL2	2	chr9:143381115-143383682|chr9:143384008-143389444	0	0	0	4	0	1	2	0	0	0	0	1	0	0	0	481.405	0	117.071	154.911	0	0	0	0	242.262	-3.51042	0.107995	0.581337	-2.03396	0.299992	0.702245	1.04694	0.579215	0.787958	-0.429526	0.824351	0.984756
circANGPT1	chr4	32646873	32699400	+	5	ENSSSCT00000006624.3	ANGPT1	1,2,3,4,5	None|chr4:32699400-32715376	0	0	0	0	1	0	2	4	1	0	0	0	0	0	0	0	116.637	0	154.911	485.461	132.894	0	0	0	-1.60946	0.373446	0.739392	-3.83273	0.0430647	0.437012	1.60946	0.406715	0.669209	3.83273	0.0561698	0.473818
circANGPT1_2	chr4	32690091	32699400	+	2	ENSSSCT00000006624.3	ANGPT1	4,5	chr4:32673061-32690091|chr4:32699400-32715376	0	0	0	0	0	0	1	0	1	0	0	0	0	0	0	0	0	0	77.4553	0	132.894	0	0	0	0	1	1	-2.21918	0.349029	0.733049	0	1	1	2.21918	0.371665	0.698771
circANK2	chr8	117358739	117417580	-	20	ENSSSCT00000009992.2	ANK2	43,42,41,40,39,38,37,36,35,34,33,32,31,30,29,28,27,26,25,24	chr8:117355268-117358739|chr8:117417580-117429652	1	0	2	0	0	0	0	0	1	0	0	0	286.316	0	302.256	0	0	0	0	0	132.894	0	0	0	3.5395	0.0946563	0.569987	1.88519	0.391583	0.765683	0	1	1	1.65432	0.442981	0.731464
circANK2_2	chr8	117395460	117417580	-	5	ENSSSCT00000009992.2	ANK2	28,27,26,25,24	chr8:117392818-117395460|chr8:117417580-117429652	0	0	5	2	4	4	1	0	0	0	0	1	0	0	755.639	240.703	466.549	468.284	77.4553	0	0	0	0	242.262	-0.267994	0.807079	0.981603	2.71168	0.0395849	0.430059	1.93248	0.162842	0.505226	-1.0472	0.527527	0.77692
circANK2_3	chr8	117476022	117489549	-	4	ENSSSCT00000009992.2	ANK2	11,10,9,8	chr8:117473598-117476022|chr8:117489549-117492573	0	0	4	0	0	0	2	2	0	0	0	0	0	0	604.511	0	0	0	154.911	242.731	0	0	0	0	3.69962	0.0540895	0.498382	0.694367	0.699025	0.943666	0	1	1	3.00526	0.195486	0.606976
circANK2_4	chr8	117488166	117498361	-	5	ENSSSCT00000009992.2	ANK2	9,8,7,6,5	chr8:117480927-117488166|chr8:117498361-117532443	0	1	0	3	1	2	0	0	2	0	0	0	0	317.991	0	361.054	116.637	234.142	0	0	265.788	0	0	0	-1.3274	0.382246	0.742756	0.0824416	0.960607	1	3.74213	0.0677441	0.39084	2.33229	0.260245	0.647137
circANK2_5	chr8	117488166	117557776	-	8	ENSSSCT00000009992.2	ANK2	9,8,7,6,5,4,3,2	chr8:117480927-117488166|chr8:117557776-117670997	0	0	0	0	0	2	3	0	0	0	0	0	0	0	0	0	0	234.142	232.366	0	0	0	0	0	-2.34617	0.397444	0.746768	-2.36989	0.392291	0.765683	2.34617	0.415205	0.672352	2.36989	0.409958	0.729046
circANK3	chr14	68425344	68426511	-	2	ENSSSCT00000011178.2	ANK3	41,40	chr14:68421863-68425344|chr14:68426511-68430165	0	0	0	1	2	0	0	0	0	0	0	0	0	0	0	120.351	233.274	0	0	0	0	0	0	0	-2.84098	0.254124	0.651868	0	1	1	2.84098	0.274644	0.564331	0	1	1
circANK3_2	chr14	68425344	68448550	-	10	ENSSSCT00000011178.2	ANK3	41,40,39,38,37,36,35,34,33,32	chr14:68421863-68425344|chr14:68448550-68450170	0	1	4	0	4	4	3	0	1	0	0	0	0	317.991	604.511	0	466.549	468.284	232.366	0	132.894	0	0	0	0.106359	0.928202	1	1.26004	0.323354	0.714491	4.11682	0.0414862	0.337211	2.96314	0.149788	0.584118
circANKDD1B	chr2	86306051	86318262	+	4	ENSSSCT00000015384.2	ANKDD1B	10,11,12,13	chr2:86300100-86306051|chr2:86318262-86321526	2	0	3	0	0	0	1	0	0	0	0	0	572.633	0	453.383	0	0	0	77.4553	0	0	0	0	0	4.28873	0.0142386	0.361575	2.88676	0.0726562	0.497028	0	1	1	1.40197	0.452495	0.734227
circANKDD1B_2	chr2	86313970	86318262	+	2	ENSSSCT00000015384.2	ANKDD1B	12,13	chr2:86309200-86313970|chr2:86318262-86321526	3	0	4	0	1	0	1	0	0	0	0	0	858.949	0	604.511	0	116.637	0	77.4553	0	0	0	0	0	3.16599	0.02444	0.427465	3.34516	0.0165441	0.333888	1.6092	0.40824	0.670375	1.43002	0.440773	0.730564
circANKFY1	chr12	52161468	52164213	-	3	ENSSSCT00000019454.2	ANKFY1	5,4,3	chr12:52153720-52161468|chr12:52164213-52168843	1	0	4	1	0	2	0	0	2	0	0	0	286.316	0	604.511	120.351	0	234.142	0	0	265.788	0	0	0	1.33732	0.349205	0.730496	1.82376	0.212415	0.657164	2.843	0.182359	0.509389	2.35656	0.265074	0.649098
circANKFY1_2	chr12	52161468	52168979	-	4	ENSSSCT00000019454.2	ANKFY1	5,4,3,2	chr12:52153720-52161468|chr12:52168979-52181032	1	1	3	5	12	7	10	3	6	2	0	3	286.316	317.991	453.383	601.756	1399.65	819.498	774.553	364.096	797.364	568.485	0	726.785	-1.29358	0.0813393	0.551922	-0.780519	0.310609	0.708347	1.04124	0.163125	0.505226	0.528177	0.495534	0.764058
circANKHD1	chr2	148134330	148145898	+	6	ENSSSCT00000015694.2	ANKHD1	2,3,4,5,6,7	chr2:148110272-148134330|chr2:148145898-148156099	1	0	1	3	1	3	3	0	0	0	0	0	286.316	0	151.128	361.054	116.637	351.213	232.366	0	0	0	0	0	-0.801628	0.520496	0.828838	0.563427	0.680327	0.933922	3.94708	0.04171	0.337211	2.58203	0.195821	0.606976
circANKHD1_2	chr2	148139472	148140466	+	2	ENSSSCT00000015694.2	ANKHD1	4,5	chr2:148138091-148139472|chr2:148140466-148143265	0	0	0	1	0	2	3	2	0	2	0	0	0	0	0	120.351	0	234.142	232.366	242.731	0	568.485	0	0	-2.84295	0.152322	0.622196	-3.26491	0.0988787	0.555527	-0.567425	0.710968	0.883814	-0.145463	0.924216	1
circANKHD1_3	chr2	148139472	148156756	+	6	ENSSSCT00000015694.2	ANKHD1	4,5,6,7,8,9	chr2:148138091-148139472|chr2:148156756-148163289	0	0	4	2	3	1	3	2	0	0	0	0	0	0	604.511	240.703	349.911	117.071	232.366	242.731	0	0	0	0	0.137232	0.900642	1	0.592258	0.612573	0.894673	3.73748	0.0591618	0.383302	3.28246	0.100834	0.548875
circANKHD1_4	chr2	148139472	148163399	+	7	ENSSSCT00000015694.2	ANKHD1	4,5,6,7,8,9,10	chr2:148138091-148139472|chr2:148163399-148186309	1	0	4	3	4	0	2	2	0	1	0	1	286.316	0	604.511	361.054	466.549	0	154.911	242.731	0	284.243	0	242.262	0.296801	0.782375	0.968792	1.21361	0.288803	0.698242	0.571376	0.650336	0.842369	-0.345438	0.794923	0.972894
circANKHD1_5	chr2	148224334	148226802	+	3	ENSSSCT00000015694.2	ANKHD1	25,26,27	chr2:148219487-148224334|chr2:148226802-148230565	0	0	0	3	0	0	0	1	1	2	0	0	0	0	0	361.054	0	0	0	121.365	132.894	568.485	0	0	-2.86024	0.202218	0.649495	-2.3815	0.270986	0.685027	-0.566265	0.778097	0.936847	-1.045	0.602545	0.8346
circANKIB1	chr9	79022335	79047485	+	7	ENSSSCT00000016687.2	ANKIB1	9,10,11,12,13,14,15	chr9:79017475-79022335|chr9:79047485-79048467	0	0	0	0	0	0	3	0	0	0	0	0	0	0	0	0	0	0	232.366	0	0	0	0	0	0	1	1	-2.39927	0.31381	0.708347	0	1	1	2.39927	0.336125	0.672453
circANKRA2	chr2	84231849	84238452	+	6	ENSSSCT00000015370.3	ANKRA2	3,4,5,6,7,8	chr2:84230945-84231849|chr2:84238452-84239692	1	0	2	0	2	0	3	1	0	0	0	0	286.316	0	302.256	0	233.274	0	232.366	121.365	0	0	0	0	1.25406	0.381845	0.742756	0.657791	0.629895	0.903734	2.34932	0.255461	0.564331	2.94558	0.153404	0.58834
circANKRD12	chr6	92037394	92039424	-	2	ENSSSCT00000004080.2	ANKRD12	12,11	chr6:92036374-92037394|chr6:92039424-92042984	0	1	0	0	0	1	0	2	0	0	1	1	0	317.991	0	0	0	117.071	0	242.731	0	0	290.72	242.262	0.876286	0.650003	0.924617	0.158443	0.936799	1	-1.76353	0.325917	0.60964	-1.04569	0.545146	0.788557
circANKRD12_2	chr6	92078906	92102784	-	6	ENSSSCT00000004080.2	ANKRD12	8,7,6,5,4,3	chr6:92055373-92078906|chr6:92102784-92111297	1	0	4	5	1	2	7	0	4	3	1	0	286.316	0	604.511	601.756	116.637	234.142	542.187	0	531.576	852.728	290.72	0	0.0983396	0.926884	1	-0.0989531	0.930273	1	-0.212993	0.854298	0.990182	-0.0156998	0.990333	1
circANKRD12_3	chr6	92078906	92111445	-	7	ENSSSCT00000004080.2	ANKRD12	8,7,6,5,4,3,2	chr6:92055373-92078906|chr6:92111445-92126802	2	0	0	1	4	0	2	0	1	0	1	1	572.633	0	0	120.351	466.549	0	154.911	0	132.894	0	290.72	242.262	-0.187025	0.893787	1	0.666727	0.664434	0.926448	0.116909	0.936612	1	-0.736843	0.6266	0.851728
circANKRD12_4	chr6	92090649	92102784	-	4	ENSSSCT00000004080.2	ANKRD12	6,5,4,3	chr6:92079055-92090649|chr6:92102784-92111297	1	0	1	1	3	0	4	1	0	0	0	0	286.316	0	151.128	120.351	349.911	0	309.821	121.365	0	0	0	0	-0.0619122	0.96616	1	-0.0601465	0.962815	1	3.20342	0.124074	0.463653	3.20166	0.120359	0.572872
circANKRD13C	chr6	132124984	132138673	+	3	ENSSSCT00000004194.2	ANKRD13C	4,5,6	chr6:132117840-132124984|chr6:132138673-132144862	0	0	2	1	1	0	4	0	3	2	0	0	0	0	302.256	120.351	116.637	0	309.821	0	398.682	568.485	0	0	0.625105	0.674377	0.934767	-0.767822	0.593666	0.884038	-1.05304	0.497337	0.711512	0.339883	0.811509	0.980597
circANKRD13C_2	chr6	132124984	132173603	+	9	ENSSSCT00000004194.2	ANKRD13C	4,5,6,7,8,9,10,11,12	chr6:132117840-132124984|chr6:132173603-132184834	1	0	0	0	0	0	1	0	0	0	0	0	286.316	0	0	0	0	0	77.4553	0	0	0	0	0	2.52258	0.231927	0.651868	1.21024	0.633294	0.90486	0	1	1	1.31233	0.511392	0.771461
circANKRD13C_3	chr6	132167542	132173603	+	3	ENSSSCT00000004194.2	ANKRD13C	10,11,12	chr6:132155299-132167542|chr6:132173603-132184834	0	0	1	4	2	6	2	0	1	0	0	0	0	0	151.128	481.405	233.274	702.427	154.911	0	132.894	0	0	0	-2.42027	0.0514006	0.48914	-0.402383	0.781271	0.981406	4.68326	0.0082509	0.195227	2.66538	0.178318	0.603178
circANKRD17	chr8	73375717	73382639	-	2	ENSSSCT00000028188.1	ANKRD17	28,27	chr8:73366189-73375717|chr8:73382639-73384478	11	3	18	6	17	4	12	3	13	2	9	9	3149.48	953.973	2720.3	722.108	1982.83	468.284	929.463	364.096	1727.62	568.485	2616.48	2180.36	1.11332	0.12016	0.601985	1.19824	0.0946581	0.548967	-0.749656	0.309552	0.595307	-0.834572	0.258174	0.647009
circANKRD2	chr14	118455495	118455879	+	2	ENSSSCT00000011512.2	ANKRD2	3,4	chr14:118452915-118455495|chr14:118455879-118457729	8	7	16	10	17	26	11	2	0	0	0	0	2290.53	2225.94	2418.04	1203.51	1982.83	3043.85	852.008	242.731	0	0	0	0	0.156835	0.809046	0.981715	2.45006	0.000761909	0.056935	6.77717	2.88882e-06	0.000806944	4.48394	0.0108002	0.299035
circANKRD23	chr3	59228051	59228710	-	3	ENSSSCT00000008981.2	ANKRD23	6,5,4	chr3:59227509-59228051|chr3:59228710-59229676	0	0	5	0	1	3	3	2	3	0	1	0	0	0	755.639	0	116.637	351.213	232.366	242.731	398.682	0	290.72	0	0.945577	0.421426	0.762693	0.14892	0.888484	1	0.670361	0.657592	0.848768	1.46702	0.307951	0.663701
circANKRD23_2	chr3	59228051	59230119	-	5	ENSSSCT00000008981.2	ANKRD23	6,5,4,3,2	chr3:59227509-59228051|chr3:59230119-59231324	0	0	0	0	2	2	1	0	2	0	1	0	0	0	0	0	233.274	234.142	77.4553	0	265.788	0	290.72	0	-3.19939	0.102706	0.581337	-2.74503	0.160054	0.612742	0.663325	0.676861	0.861039	0.208966	0.898637	1
circANKRD28	chr13	3081505	3113691	-	15	ENSSSCT00000012259.2	ANKRD28	24,23,22,21,20,19,18,17,16,15,14,13,12,11,10	chr13:3080865-3081505|chr13:3113691-3114888	0	0	0	2	0	0	0	0	0	0	0	0	0	0	0	240.703	0	0	0	0	0	0	0	0	-2.37305	0.326803	0.708887	0	1	1	2.37305	0.348921	0.619789	0	1	1
circANKRD28_2	chr13	3089206	3113691	-	11	ENSSSCT00000012259.2	ANKRD28	20,19,18,17,16,15,14,13,12,11,10	chr13:3088127-3089206|chr13:3113691-3114888	0	0	1	3	1	4	1	2	0	0	1	0	0	0	151.128	361.054	116.637	468.284	77.4553	242.731	0	0	290.72	0	-1.86936	0.156479	0.622196	-0.447375	0.762528	0.971947	1.60136	0.233022	0.554729	0.179366	0.90381	1
circANKRD28_3	chr13	3092386	3096000	-	2	ENSSSCT00000012259.2	ANKRD28	18,17	chr13:3089627-3092386|chr13:3096000-3096623	0	0	0	0	0	0	2	0	0	0	0	0	0	0	0	0	0	0	154.911	0	0	0	0	0	0	1	1	-1.95433	0.385479	0.764073	0	1	1	1.95433	0.408842	0.729046
circANKRD28_4	chr13	3130974	3132568	-	2	ENSSSCT00000012259.2	ANKRD28	6,5	chr13:3122936-3130974|chr13:3132568-3137878	0	0	2	0	1	3	0	1	0	0	0	2	0	0	302.256	0	116.637	351.213	0	121.365	0	0	0	484.524	-0.266619	0.87663	1	1.36593	0.41184	0.778248	-0.116737	0.941559	1	-1.74929	0.308376	0.663701
circANKRD42	chr9	19251281	19300140	+	8	ENSSSCT00000016257.2	ANKRD42	2,3,4,5,6,7,8,9	chr9:19248964-19251281|chr9:19300140-19308687	0	0	0	1	1	0	0	0	0	0	0	0	0	0	0	120.351	116.637	0	0	0	0	0	0	0	-2.3583	0.328774	0.708887	0	1	1	2.3583	0.350942	0.619789	0	1	1
circANKRD42_2	chr9	19259966	19265120	+	3	ENSSSCT00000016257.2	ANKRD42	3,4,5	chr9:19251445-19259966|chr9:19265120-19269562	0	0	1	0	0	0	4	0	1	0	0	0	0	0	151.128	0	0	0	309.821	0	132.894	0	0	0	2.10339	0.223506	0.651868	-1.06175	0.605964	0.891911	0	1	1	3.16513	0.183452	0.606245
circANKRD42_3	chr9	19264984	19287128	+	3	ENSSSCT00000016257.2	ANKRD42	5,6,7	chr9:19263971-19264984|chr9:19287128-19293236	0	1	1	9	1	2	9	6	2	0	0	0	0	317.991	151.128	1083.16	116.637	234.142	697.097	728.192	265.788	0	0	0	-1.5342	0.203393	0.649495	-1.79048	0.13052	0.589078	4.69401	0.0116552	0.218323	4.9503	0.00664902	0.259913
circANKRD42_4	chr9	19264984	19300140	+	5	ENSSSCT00000016257.2	ANKRD42	5,6,7,8,9	chr9:19263971-19264984|chr9:19300140-19308687	0	1	1	1	2	3	2	0	1	0	0	0	0	317.991	151.128	120.351	233.274	351.213	154.911	0	132.894	0	0	0	-0.579937	0.614263	0.897662	0.484989	0.700391	0.943666	3.73597	0.0468826	0.345713	2.67105	0.174343	0.601796
circANKRD42_5	chr9	19264984	19312056	+	7	ENSSSCT00000016257.2	ANKRD42	5,6,7,8,9,10,11	chr9:19263971-19264984|chr9:19312056-19319890	0	0	1	2	3	7	1	2	11	0	0	2	0	0	151.128	240.703	349.911	819.498	77.4553	242.731	1461.83	0	0	484.524	-2.4628	0.0919977	0.567786	-2.73541	0.0598709	0.468576	1.3419	0.314391	0.600136	1.61451	0.22377	0.619385
circANKRD6	chr1	64530709	64532147	+	2	ENSSSCT00000004778.2	ANKRD6	7,8	chr1:64528418-64530709|chr1:64532147-64536508	0	0	1	1	0	0	1	0	2	0	0	0	0	0	151.128	120.351	0	0	77.4553	0	265.788	0	0	0	0.539959	0.755019	0.955813	-0.60192	0.743606	0.961303	1.61975	0.41782	0.672634	2.76163	0.207025	0.610868
circANKS1A	chr7	35673692	35676214	+	3	ENSSSCT00000001709.2	ANKS1A	7,8,9	chr7:35673405-35673692|chr7:35676214-35679572	0	0	1	0	1	1	1	0	7	0	1	0	0	0	151.128	0	116.637	117.071	77.4553	0	930.259	0	290.72	0	-0.183741	0.926254	1	-2.004	0.248527	0.677032	-0.197374	0.915201	1	1.62289	0.351955	0.681011
circANO10	chr13	29765348	29767010	-	2	ENSSSCT00000012366.2	ANO10	4,3	chr13:29754177-29765348|chr13:29767010-29781941	0	0	0	2	0	0	1	0	0	0	0	0	0	0	0	240.703	0	0	77.4553	0	0	0	0	0	-2.3726	0.316385	0.704982	-1.31731	0.480983	0.805894	2.3726	0.339262	0.616461	1.31731	0.50659	0.767047
circANO5	chr2	40434276	40440996	-	3	ENSSSCT00000014572.2	ANO5	6,5,4	chr2:40432227-40434276|chr2:40440996-40447652	0	0	0	0	0	0	2	2	4	0	1	1	0	0	0	0	0	0	154.911	242.731	531.576	0	290.72	242.262	0	1	1	-4.0426	0.0248819	0.370519	-3.37837	0.038176	0.330661	0.664231	0.590677	0.824167
circANTXR2	chr8	146890663	146892955	+	4	ENSSSCT00000010136.2	ANTXR2	4,5,6,7	chr8:146875559-146890663|chr8:146892955-146911443	1	0	3	8	13	9	8	9	4	1	0	1	286.316	0	453.383	962.81	1516.28	1053.64	619.642	1092.29	531.576	284.243	0	242.262	-1.92715	0.00829671	0.34334	-1.26756	0.10117	0.556797	2.58794	0.00249439	0.120619	1.92835	0.034555	0.440027
circANTXR2_2	chr8	146890663	146915909	+	7	ENSSSCT00000010136.2	ANTXR2	4,5,6,7,8,9,10	chr8:146875559-146890663|chr8:146915909-146931115	0	1	4	9	8	8	7	2	0	1	0	1	0	317.991	604.511	1083.16	933.097	936.569	542.187	242.731	0	284.243	0	242.262	-1.39638	0.072547	0.528007	0.268235	0.76164	0.971947	2.33297	0.0128552	0.22716	0.668356	0.534364	0.781495
circANTXR2_3	chr8	146890663	146941701	+	9	ENSSSCT00000010136.2	ANTXR2	4,5,6,7,8,9,10,11,12	chr8:146875559-146890663|chr8:146941701-146956378	1	1	1	2	3	1	3	1	0	0	1	0	286.316	317.991	151.128	240.703	349.911	117.071	232.366	121.365	0	0	290.72	0	-0.0297539	0.976108	1	0.698102	0.53145	0.840503	1.21645	0.355942	0.623497	0.488592	0.722867	0.927661
circANXA7	chr14	82341878	82348156	-	4	ENSSSCT00000011272.2	ANXA7	10,9,8,7	chr14:82337611-82341878|chr14:82348156-82349978	0	0	2	2	0	0	3	0	0	0	0	0	0	0	302.256	240.703	0	0	232.366	0	0	0	0	0	0.424246	0.853521	1	0.390388	0.866685	1	2.37236	0.334628	0.615072	2.40622	0.324372	0.672415
circAP1AR	chr8	118376129	118385149	-	5	ENSSSCT00000009996.2	AP1AR	6,5,4,3,2	chr8:118373600-118376129|chr8:118385149-118400641	1	2	3	15	8	6	7	3	1	2	1	0	286.316	635.982	453.383	1805.27	933.097	702.427	542.187	364.096	132.894	568.485	290.72	0	-1.29952	0.0777698	0.544265	0.279141	0.737427	0.959202	1.99471	0.0184941	0.244063	0.416045	0.663826	0.885472
circAP1B1	chr14	49437165	49440870	-	5	ENSSSCT00000010934.2	AP1B1	21,20,19,18,17	chr14:49435406-49437165|chr14:49440870-49445109	0	0	2	0	0	0	0	0	0	0	1	0	0	0	302.256	0	0	0	0	0	0	0	290.72	0	2.80545	0.166991	0.622417	2.80545	0.156422	0.612742	-2.57	0.206172	0.53949	-2.57	0.194299	0.606976
circAP2A1	chr6	50530896	50531586	+	3	ENSSSCT00000003554.2	AP2A1	2,3,4	chr6:50515860-50530896|chr6:50531586-50540176	2	5	9	20	29	24	27	9	11	5	6	3	572.633	1589.96	1360.15	2407.03	3382.48	2809.71	2091.29	1092.29	1461.83	1421.21	1744.32	726.785	-1.24857	0.00926978	0.344828	-0.406208	0.421849	0.783364	1.16205	0.0181542	0.243412	0.319683	0.538225	0.783885
circAP2A2	chr2	67322	70923	-	3	ENSSSCT00000014031.2	AP2A2	6,5,4	chr2:63998-67322|chr2:70923-79834	0	0	3	1	0	1	2	2	1	2	0	0	0	0	453.383	120.351	0	117.071	154.911	242.731	132.894	568.485	0	0	1.17255	0.371878	0.739279	0.179683	0.875832	1	-1.0445	0.46373	0.690317	-0.0516356	0.96898	1
circAP2A2_2	chr2	67322	79903	-	4	ENSSSCT00000014031.2	AP2A2	6,5,4,3	chr2:63998-67322|chr2:79903-93868	0	0	1	0	0	1	6	5	2	0	0	0	0	0	151.128	0	0	117.071	464.732	606.827	265.788	0	0	0	0.660885	0.67032	0.934577	-2.34458	0.0504392	0.443552	1.61132	0.399145	0.666549	4.61679	0.00784296	0.26703
circAP3S2	chr7	60322801	60342512	-	3	ENSSSCT00000025884.1	AP3S2	4,3,2	chr7:60287581-60322801|chr7:60342512-60346452	0	0	0	1	0	1	1	2	2	0	0	0	0	0	0	120.351	0	117.071	77.4553	242.731	265.788	0	0	0	-2.35587	0.209066	0.651837	-3.40287	0.0639582	0.476373	2.35587	0.241398	0.55997	3.40287	0.0828	0.522685
circAPBB2	chr8	33316587	33354941	+	5	ENSSSCT00000029046.1	APBB2	4,5,6,7,8	chr8:33308584-33316587|chr8:33354941-33410712	1	0	2	1	0	2	6	3	0	0	0	1	286.316	0	302.256	120.351	0	234.142	464.732	364.096	0	0	0	242.262	0.778594	0.544088	0.846302	-0.400414	0.733665	0.958595	0.348326	0.822659	0.973771	1.52733	0.279494	0.651471
circAPBB2_2	chr8	33317025	33354941	+	4	ENSSSCT00000029046.1	APBB2	5,6,7,8	chr8:33316650-33317025|chr8:33354941-33410712	1	2	6	9	10	11	29	12	4	0	4	0	286.316	635.982	906.767	1083.16	1166.37	1287.78	2246.2	1456.38	531.576	0	1162.88	0	-0.838541	0.254774	0.651868	-1.13421	0.114933	0.568223	1.63516	0.0531885	0.367604	1.93083	0.0193909	0.373554
circAPC	chr2	121549318	121561759	+	6	ENSSSCT00000015525.2	APC	3,4,5,6,7,8	chr2:121542803-121549318|chr2:121561759-121567908	0	0	2	0	2	2	2	2	4	0	0	0	0	0	302.256	0	233.274	234.142	154.911	242.731	531.576	0	0	0	-0.168047	0.905219	1	-1.01637	0.423526	0.783364	3.20074	0.112921	0.452763	4.04907	0.0374186	0.444004
circAPI5	chr2	20684776	20687369	-	4	ENSSSCT00000014509.2	API5	7,6,5,4	chr2:20683532-20684776|chr2:20687369-20688142	1	0	1	2	2	0	3	1	2	0	0	0	286.316	0	151.128	240.703	233.274	0	232.366	121.365	265.788	0	0	0	-0.0573228	0.961744	1	-0.42253	0.707624	0.94656	3.2069	0.096891	0.437332	3.5721	0.0562031	0.473818
circAPLF	chr3	77312221	77352520	-	7	ENSSSCT00000009140.2	APLF	8,7,6,5,4,3,2	chr3:77296806-77312221|chr3:77352520-77361775	0	0	0	2	1	0	4	0	0	0	0	0	0	0	0	240.703	116.637	0	309.821	0	0	0	0	0	-2.85113	0.218269	0.651868	-2.75967	0.224831	0.66379	2.85113	0.24053	0.559503	2.75967	0.247685	0.641233
circAPLF_2	chr3	77329459	77352520	-	5	ENSSSCT00000009140.2	APLF	6,5,4,3,2	chr3:77319582-77329459|chr3:77352520-77361775	0	0	3	0	0	0	0	0	1	0	0	0	0	0	453.383	0	0	0	0	0	132.894	0	0	0	3.29633	0.11375	0.599738	1.63904	0.454755	0.797092	0	1	1	1.65728	0.444778	0.732388
circAPLP2	chr9	63000516	63001823	+	2	ENSSSCT00000016613.2	APLP2	2,3	chr9:62965257-63000516|chr9:63001823-63011380	0	0	4	1	0	0	2	0	1	0	0	3	0	0	604.511	120.351	0	0	154.911	0	132.894	0	0	726.785	2.12759	0.20685	0.650936	1.12195	0.478589	0.805894	-2.21481	0.201582	0.532889	-1.20916	0.460494	0.734227
circAPLP2_2	chr9	63000516	63011493	+	3	ENSSSCT00000016613.2	APLP2	2,3,4	chr9:62965257-63000516|chr9:63011493-63012887	0	0	0	2	5	2	0	2	0	0	0	0	0	0	0	240.703	583.186	234.142	0	242.731	0	0	0	0	-4.28294	0.0213927	0.401513	-2.28678	0.230837	0.666435	4.28294	0.0292988	0.30232	2.28678	0.262953	0.649098
circAPOO	chrX	21357963	21366041	-	4	ENSSSCT00000033489.1	APOO	5,4,3,2	chrX:21350819-21357963|chrX:21366041-21441895	0	0	4	4	1	1	3	4	2	0	0	1	0	0	604.511	481.405	116.637	117.071	232.366	485.461	265.788	0	0	242.262	0.168699	0.871527	1	-0.244738	0.821096	1	1.24401	0.373563	0.640175	1.65745	0.218902	0.617332
circAPPBP2	chr12	39195359	39197730	-	2	ENSSSCT00000019242.2	APPBP2	11,10	chr12:39193158-39195359|chr12:39197730-39200634	2	0	1	2	2	2	2	0	0	0	0	0	572.633	0	151.128	240.703	233.274	234.142	154.911	0	0	0	0	0	-0.0287486	0.978049	1	1.54994	0.215541	0.659311	3.73787	0.0492924	0.35248	2.15918	0.270726	0.651471
circARAF	chrX	47397168	47397732	-	3	ENSSSCT00000013423.3	ARAF	6,5,4	chrX:47395314-47397168|chrX:47397732-47398942	1	1	1	3	1	0	3	1	0	0	1	0	286.316	317.991	151.128	361.054	116.637	0	232.366	121.365	0	0	290.72	0	0.51977	0.673081	0.934577	0.756821	0.540855	0.84717	0.683667	0.643576	0.837124	0.446616	0.758811	0.950144
circARCN1	chr9	50831547	50834603	-	4	ENSSSCT00000028599.1	ARCN1	5,4,3,2	chr9:50825216-50831547|chr9:50834603-50841873	0	1	4	3	1	1	4	4	1	1	0	0	0	317.991	604.511	361.054	116.637	117.071	309.821	485.461	132.894	284.243	0	0	0.792308	0.431966	0.762693	0.175885	0.850229	1	0.978451	0.477397	0.696663	1.59487	0.217199	0.615273
circAREL1	chr7	103739072	103762476	-	17	ENSSSCT00000002634.2	AREL1	19,18,17,16,15,14,13,12,11,10,9,8,7,6,5,4,3	chr7:103738968-103739072|chr7:103762476-103766460	0	0	0	0	0	0	2	0	3	0	0	0	0	0	0	0	0	0	154.911	0	398.682	0	0	0	0	1	1	-3.40339	0.18665	0.639087	0	1	1	3.40339	0.203984	0.609866
circARFGAP3	chr5	3454358	3462302	+	4	ENSSSCT00000000039.2	ARFGAP3	3,4,5,6	chr5:3372729-3454358|chr5:3462302-3468413	1	0	0	2	2	1	2	0	0	0	0	1	286.316	0	0	240.703	233.274	117.071	154.911	0	0	0	0	242.262	-1.14619	0.407069	0.752617	0.201823	0.904129	1	0.996643	0.481164	0.699268	-0.351368	0.823962	0.984756
circARFGAP3_2	chr5	3457118	3458242	+	2	ENSSSCT00000000039.2	ARFGAP3	4,5	chr5:3454431-3457118|chr5:3458242-3462214	0	0	5	18	14	1	2	1	0	2	0	1	0	0	755.639	2166.32	1632.92	117.071	154.911	121.365	0	568.485	0	242.262	-1.97207	0.0655077	0.52478	1.50444	0.218523	0.659311	2.19177	0.0542026	0.369279	-1.28473	0.330989	0.672453
circARFGAP3_3	chr5	3457118	3462302	+	3	ENSSSCT00000000039.2	ARFGAP3	4,5,6	chr5:3454431-3457118|chr5:3462302-3468413	0	0	7	12	4	0	6	2	3	0	0	1	0	0	1057.89	1444.22	466.549	0	464.732	242.731	398.682	0	0	242.262	-0.582767	0.627924	0.909251	0.160128	0.891021	1	2.61279	0.0828193	0.415661	1.8699	0.2219	0.617332
circARFGEF1	chr4	73577489	73579762	+	3	ENSSSCT00000006796.2	ARFGEF1	2,3,4	chr4:73527035-73577489|chr4:73579762-73582504	0	0	2	2	7	5	0	3	0	0	0	1	0	0	302.256	240.703	816.46	585.355	0	364.096	0	0	0	242.262	-1.87167	0.136679	0.602346	0.236458	0.853744	1	2.39951	0.0868711	0.423608	0.291377	0.857703	1
circARFGEF1_2	chr4	73577489	73588127	+	5	ENSSSCT00000006796.2	ARFGEF1	2,3,4,5,6	chr4:73527035-73577489|chr4:73588127-73591601	0	3	0	1	0	0	1	0	0	0	0	0	0	953.973	0	120.351	0	0	77.4553	0	0	0	0	0	2.46419	0.352608	0.730496	2.77568	0.291428	0.698704	1.62567	0.461843	0.690317	1.31418	0.509569	0.769057
circARFGEF2	chr17	57038658	57046105	+	4	ENSSSCT00000008164.2	ARFGEF2	21,22,23,24	chr17:57037382-57038658|chr17:57046105-57049038	0	0	0	0	0	0	3	0	0	0	0	0	0	0	0	0	0	0	232.366	0	0	0	0	0	0	1	1	-2.39927	0.31381	0.708347	0	1	1	2.39927	0.336125	0.672453
circARHGAP10	chr8	85966162	85975055	-	2	ENSSSCT00000009888.2	ARHGAP10	9,8	chr8:85954479-85966162|chr8:85975055-85981498	0	0	0	0	0	0	3	4	5	0	0	0	0	0	0	0	0	0	232.366	485.461	664.47	0	0	0	0	1	1	-4.61289	0.0108652	0.279558	0	1	1	4.61289	0.0156812	0.341731
circARHGAP10_2	chr8	85966162	85981573	-	3	ENSSSCT00000009888.2	ARHGAP10	9,8,7	chr8:85954479-85966162|chr8:85981573-86001856	16	9	41	17	33	16	35	15	15	3	1	7	4581.06	2861.92	6196.24	2045.97	3849.03	1873.14	2710.93	1820.48	1993.41	852.728	290.72	1695.83	0.8482	0.0600436	0.506225	1.08125	0.0171158	0.333888	1.38632	0.0152354	0.22716	1.15327	0.0450478	0.461202
circARHGAP10_3	chr8	85966162	86004688	-	5	ENSSSCT00000009888.2	ARHGAP10	9,8,7,6,5	chr8:85954479-85966162|chr8:86004688-86006628	0	0	0	3	1	0	0	0	0	0	0	0	0	0	0	361.054	116.637	0	0	0	0	0	0	0	-3.21904	0.197192	0.649073	0	1	1	3.21904	0.215984	0.541331	0	1	1
circARHGAP10_4	chr8	85974967	85981573	-	2	ENSSSCT00000009888.2	ARHGAP10	8,7	chr8:85966221-85974967|chr8:85981573-86001856	0	0	0	0	2	1	0	0	10	0	0	0	0	0	0	0	233.274	117.071	0	0	1328.94	0	0	0	-2.83219	0.218245	0.651868	-4.57304	0.0723818	0.496845	2.83219	0.24075	0.559503	4.57304	0.0821962	0.520835
circARHGAP12	chr10	47064148	47075999	-	4	ENSSSCT00000012068.2	ARHGAP12	14,13,12,11	chr10:47062323-47064148|chr10:47075999-47086472	0	0	0	4	0	0	0	0	0	0	0	0	0	0	0	481.405	0	0	0	0	0	0	0	0	-3.22755	0.196127	0.649073	0	1	1	3.22755	0.214872	0.541331	0	1	1
circARHGAP12_2	chr10	47064148	47086534	-	5	ENSSSCT00000012068.2	ARHGAP12	14,13,12,11,10	chr10:47062323-47064148|chr10:47086534-47093409	1	2	2	7	1	3	5	0	2	0	0	0	286.316	635.982	302.256	842.459	116.637	351.213	387.276	0	265.788	0	0	0	-0.150802	0.882793	1	0.714436	0.50735	0.818548	4.57007	0.0135281	0.22716	3.70484	0.0556386	0.473818
circARHGAP12_3	chr10	47097357	47106567	-	3	ENSSSCT00000012068.2	ARHGAP12	7,6,5	chr10:47093826-47097357|chr10:47106567-47114184	1	0	0	4	0	0	0	0	0	0	0	0	286.316	0	0	481.405	0	0	0	0	0	0	0	0	-0.6809	0.843675	0.996861	2.54883	0.288125	0.69783	3.22973	0.317924	0.603067	0	1	1
circARHGAP21	chr10	56077004	56083293	+	3	ENSSSCT00000012118.2	ARHGAP21	5,6,7	chr10:56065304-56077004|chr10:56083293-56090813	0	2	0	2	4	0	5	0	0	0	0	1	0	635.982	0	240.703	466.549	0	387.276	0	0	0	0	242.262	-0.299038	0.861637	1	0.373907	0.8411	1	1.27346	0.4996	0.712777	0.600517	0.744859	0.942888
circARHGAP23	chr12	63485887	63486597	-	3	ENSSSCT00000027800.1	ARHGAP23	9,8,7	chr12:63483565-63485887|chr12:63486597-63489786	0	0	2	0	0	0	3	0	0	0	0	0	0	0	302.256	0	0	0	232.366	0	0	0	0	0	2.74104	0.253064	0.651868	0.363842	0.903918	1	0	1	1	2.3772	0.386268	0.71133
circARHGAP26	chr2	150648582	150660330	+	4	ENSSSCT00000015737.2	ARHGAP26	7,8,9,10	chr2:150641434-150648582|chr2:150660330-150679196	0	2	0	0	1	0	3	0	0	0	0	0	0	635.982	0	0	116.637	0	232.366	0	0	0	0	0	1.91725	0.445981	0.770184	1.11686	0.656927	0.920192	1.60432	0.460383	0.690317	2.40471	0.326809	0.672453
circARHGAP6	chrX	8578422	8581627	-	2	ENSSSCT00000035835.1	ARHGAP6	5,4	chrX:8568838-8578422|chrX:8581627-8590321	0	0	3	1	0	0	1	4	2	0	0	1	0	0	453.383	120.351	0	0	77.4553	485.461	265.788	0	0	242.262	1.86944	0.205944	0.650936	-0.411578	0.756186	0.968935	-0.871133	0.608632	0.812478	1.40988	0.35411	0.681666
circARHGEF12	chr9	52663749	52677558	+	8	ENSSSCT00000016495.2	ARHGEF12	4,5,6,7,8,9,10,11	chr9:52652640-52663749|chr9:52677558-52686336	0	0	0	3	1	0	0	0	0	0	0	0	0	0	0	361.054	116.637	0	0	0	0	0	0	0	-3.21904	0.197192	0.649073	0	1	1	3.21904	0.215984	0.541331	0	1	1
circARHGEF2	chr4	102814250	102816499	+	3	ENSSSCT00000007121.1	ARHGEF2	13,14,15	chr4:102812204-102814250|chr4:102816499-102818607	0	0	0	1	1	1	1	1	0	1	0	1	0	0	0	120.351	116.637	117.071	77.4553	121.365	0	284.243	0	242.262	-2.84208	0.117218	0.599738	-2.21289	0.221931	0.663025	-0.538998	0.659115	0.849751	-1.16818	0.363032	0.691019
circARHGEF26	chr13	102287900	102304005	+	3	ENSSSCT00000030324.1	ARHGEF26	8,9,10	chr13:102283890-102287900|chr13:102304005-102324128	0	0	1	6	3	0	3	1	0	0	0	0	0	0	151.128	722.108	349.911	0	232.366	121.365	0	0	0	0	-2.10256	0.185053	0.645472	-0.740986	0.650177	0.915901	4.29581	0.0395208	0.33183	2.93423	0.162322	0.599579
circARHGEF6	chrX	127709213	127714885	-	3	ENSSSCT00000030110.1	ARHGEF6	7,6,5	chrX:127683003-127709213|chrX:127714885-127725494	0	3	1	3	2	2	8	3	1	0	0	2	0	953.973	151.128	361.054	233.274	234.142	619.642	364.096	132.894	0	0	484.524	0.208231	0.844823	0.997261	-0.275634	0.77772	0.980044	0.587756	0.621193	0.82237	1.07162	0.342259	0.675736
circARHGEF6_2	chrX	127709213	127725565	-	4	ENSSSCT00000030110.1	ARHGEF6	7,6,5,4	chrX:127683003-127709213|chrX:127725565-127737963	2	1	17	14	27	17	13	13	13	4	0	4	572.633	317.991	2569.17	1684.92	3149.2	1990.21	1006.92	1577.75	1727.62	1136.97	0	969.047	-0.794067	0.223174	0.651868	-0.119297	0.859305	1	1.64548	0.0245887	0.282558	0.970713	0.195532	0.606976
circARID2	chr5	79676711	79678845	+	5	ENSSSCT00000030858.1	ARID2	5,6,7,8,9	chr5:79666579-79676711|chr5:79678845-79684852	2	0	3	2	4	10	12	8	9	5	1	1	572.633	0	453.383	240.703	466.549	1170.71	929.463	970.923	1196.05	1421.21	290.72	242.262	-0.732156	0.373083	0.739279	-1.42114	0.0665176	0.484449	-0.0203777	0.979283	1	0.668603	0.358598	0.684938
circARID2_2	chr5	79698893	79718761	+	5	ENSSSCT00000030858.1	ARID2	14,15,16,17,18	chr5:79690963-79698893|chr5:79718761-79724380	0	0	0	0	1	0	6	0	0	0	0	0	0	0	0	0	116.637	0	464.732	0	0	0	0	0	-1.60319	0.467064	0.785549	-3.21537	0.26942	0.685027	1.60319	0.489105	0.703942	3.21537	0.285601	0.653682
circARID2_3	chr5	79715411	79718761	+	4	ENSSSCT00000030858.1	ARID2	15,16,17,18	chr5:79699042-79715411|chr5:79718761-79724380	0	2	0	0	8	3	2	1	1	2	1	1	0	635.982	0	0	933.097	351.213	154.911	121.365	132.894	568.485	290.72	242.262	-1.25302	0.314861	0.704078	0.260639	0.854531	1	0.229767	0.838724	0.98232	-1.28389	0.29516	0.656761
circARID4B	chr14	60123993	60137643	+	6	ENSSSCT00000011120.2	ARID4B	7,8,9,10,11,12	chr14:60119896-60123993|chr14:60137643-60138578	0	0	1	3	2	3	1	0	1	0	0	0	0	0	151.128	361.054	233.274	351.213	77.4553	0	132.894	0	0	0	-1.8289	0.11741	0.599738	0.0808126	0.953644	1	4.12581	0.0180126	0.242483	2.21609	0.254933	0.647009
circARID4B_2	chr14	60179345	60183283	+	3	ENSSSCT00000011120.2	ARID4B	19,20,21	chr14:60174009-60179345|chr14:60183283-60185865	0	0	4	4	4	1	4	3	4	0	0	0	0	0	604.511	481.405	466.549	117.071	309.821	364.096	531.576	0	0	0	-0.338111	0.733483	0.949643	-0.478142	0.622385	0.900204	4.28788	0.0178399	0.241698	4.42791	0.0129529	0.318671
circARIH1	chr7	65184010	65184904	+	2	ENSSSCT00000002151.2	ARIH1	3,4	chr7:65168587-65184010|chr7:65184904-65188148	0	1	6	9	15	12	12	2	4	2	2	1	0	317.991	906.767	1083.16	1749.56	1404.85	929.463	242.731	531.576	568.485	581.441	242.262	-1.46649	0.0310197	0.457043	-0.2579	0.727631	0.954909	1.60071	0.0279673	0.30047	0.392124	0.621086	0.845949
circARIH1_2	chr7	65184010	65189215	+	4	ENSSSCT00000002151.2	ARIH1	3,4,5,6	chr7:65168587-65184010|chr7:65189215-65192816	0	1	0	0	4	5	1	0	0	0	1	0	0	317.991	0	0	466.549	585.355	77.4553	0	0	0	290.72	0	-1.83161	0.254618	0.651868	1.03335	0.568908	0.865619	1.73558	0.284513	0.571756	-1.12937	0.529586	0.778749
circARIH1_3	chr7	65184010	65192947	+	5	ENSSSCT00000002151.2	ARIH1	3,4,5,6,7	chr7:65168587-65184010|chr7:65192947-65196659	0	0	0	3	3	2	0	1	5	0	0	0	0	0	0	361.054	349.911	234.142	0	121.365	664.47	0	0	0	-4.12668	0.0373198	0.45914	-3.79349	0.057497	0.460983	4.12668	0.0477823	0.34668	3.79349	0.0717897	0.508793
circARIH1_4	chr7	65188148	65192947	+	3	ENSSSCT00000002151.2	ARIH1	5,6,7	chr7:65184904-65188148|chr7:65192947-65196659	0	0	3	2	1	0	3	2	0	0	1	1	0	0	453.383	240.703	116.637	0	232.366	242.731	0	0	290.72	242.262	0.667229	0.602746	0.888831	0.233241	0.847015	1	-0.530862	0.70338	0.877459	-0.0968741	0.943891	1
circARIH2	chr13	34853743	34862922	+	5	ENSSSCT00000012445.2	ARIH2	2,3,4,5,6	chr13:34827287-34853743|chr13:34862922-34864729	1	0	0	1	0	2	5	0	6	1	0	0	286.316	0	0	120.351	0	234.142	387.276	0	797.364	284.243	0	0	-0.44138	0.782108	0.968792	-2.02273	0.189366	0.639087	0.311453	0.850027	0.987292	1.89281	0.223566	0.619333
circARL1	chr5	86794413	86799615	+	3	ENSSSCT00000000950.2	ARL1	2,3,4	chr5:86791148-86794413|chr5:86799615-86803351	0	0	1	6	2	3	2	5	1	0	0	0	0	0	151.128	722.108	233.274	351.213	154.911	606.827	132.894	0	0	0	-2.31807	0.0774338	0.544147	-1.76715	0.192505	0.640478	4.56763	0.0132163	0.22716	4.0167	0.0351556	0.440027
circARL2BP	chr6	17199324	17203705	+	4	ENSSSCT00000003119.2	ARL2BP	2,3,4,5	chr6:17198310-17199324|chr6:17203705-17204493	0	0	0	5	1	0	10	1	1	0	0	0	0	0	0	601.756	116.637	0	774.553	121.365	132.894	0	0	0	-3.75163	0.0686674	0.52478	-4.29655	0.0358614	0.41851	3.75163	0.0836508	0.416638	4.29655	0.0451228	0.461202
circARL6	chr13	172805131	172817294	-	4	ENSSSCT00000023112.1	ARL6	5,4,3,2	chr13:172782850-172805131|chr13:172817294-172820723	0	0	1	2	1	0	4	0	2	0	0	0	0	0	151.128	240.703	116.637	0	309.821	0	265.788	0	0	0	-0.632123	0.69457	0.94366	-1.29131	0.395603	0.767632	2.84721	0.170403	0.508992	3.5064	0.0860715	0.528409
circARPP21	chr13	22797969	22809064	+	8	ENSSSCT00000012305.2	ARPP21	2,3,4,5,6,7,8,9	chr13:22756224-22797969|chr13:22809064-22820958	0	2	4	2	3	5	10	4	4	6	3	8	0	635.982	604.511	240.703	349.911	585.355	774.553	485.461	531.576	1705.46	872.161	1938.09	0.173798	0.824565	0.991167	-0.452163	0.532672	0.841034	-1.905	0.00279153	0.127505	-1.27904	0.0291063	0.426251
circARPP21_2	chr13	22797969	22823130	+	10	ENSSSCT00000012305.2	ARPP21	2,3,4,5,6,7,8,9,10,11	chr13:22756224-22797969|chr13:22823130-22829578	0	1	0	0	0	0	3	0	1	0	0	0	0	317.991	0	0	0	0	232.366	0	132.894	0	0	0	2.54989	0.1846	0.645472	-0.364888	0.855733	1	0	1	1	2.91478	0.221784	0.617332
circARPP21_3	chr13	22805904	22809064	+	4	ENSSSCT00000012305.2	ARPP21	6,7,8,9	chr13:22802001-22805904|chr13:22809064-22820958	0	0	0	0	2	0	1	0	0	0	0	0	0	0	0	0	233.274	0	77.4553	0	0	0	0	0	-2.34371	0.320313	0.704982	-1.31701	0.481289	0.805894	2.34371	0.343294	0.616461	1.31701	0.506864	0.767047
circART3	chr8	75960259	75960968	+	1	ENSSSCT00000009831.2	ART3	3	chr8:75955082-75960259|chr8:75960968-75980110	2	0	1	0	5	0	1	0	2	0	0	0	572.633	0	151.128	0	583.186	0	77.4553	0	265.788	0	0	0	0.262621	0.876772	1	0.981785	0.565272	0.865619	3.48493	0.124762	0.464607	2.76577	0.213984	0.611265
circASAH1	chr17	6303396	6317255	-	8	ENSSSCT00000007660.2	ASAH1	10,9,8,7,6,5,4,3	chr17:6299319-6303396|chr17:6317255-6320752	0	0	1	0	0	2	3	1	0	0	0	0	0	0	151.128	0	0	234.142	232.366	121.365	0	0	0	0	-0.210633	0.919711	1	-0.766771	0.68201	0.934066	2.34906	0.282838	0.57113	2.9052	0.193811	0.606976
circASAH1_2	chr17	6306457	6316411	-	5	ENSSSCT00000007660.2	ASAH1	8,7,6,5,4	chr17:6304297-6306457|chr17:6316411-6317164	0	0	0	1	0	0	0	1	0	0	1	0	0	0	0	120.351	0	0	0	121.365	0	0	290.72	0	-1.62498	0.427906	0.762693	-1.60531	0.433045	0.783793	-0.945822	0.694098	0.874686	-0.965497	0.684269	0.902665
circASAP2	chr3	135328995	135336298	-	4	ENSSSCT00000009454.2	ASAP2	13,12,11,10	chr3:135321480-135328995|chr3:135336298-135341138	0	0	2	2	0	4	3	0	1	0	1	0	0	0	302.256	240.703	0	468.284	232.366	0	132.894	0	290.72	0	-0.755724	0.601236	0.888208	0.0261871	0.981135	1	1.2016	0.447128	0.688262	0.419689	0.791068	0.970593
circASAP2_2	chr3	135341138	135350662	-	4	ENSSSCT00000009454.2	ASAP2	9,8,7,6	chr3:135336298-135341138|chr3:135350662-135358107	0	0	0	0	1	2	1	0	0	0	0	0	0	0	0	0	116.637	234.142	77.4553	0	0	0	0	0	-2.8328	0.243595	0.651868	-1.32619	0.472175	0.804873	2.8328	0.264752	0.564331	1.32619	0.498702	0.764058
circASAP2_3	chr3	135341138	135366829	-	8	ENSSSCT00000009454.2	ASAP2	9,8,7,6,5,4,3,2	chr3:135336298-135341138|chr3:135366829-135379416	0	1	1	0	2	0	2	0	2	1	0	0	0	317.991	151.128	0	233.274	0	154.911	0	265.788	284.243	0	0	0.81347	0.585998	0.877688	0.111376	0.937741	1	-0.17955	0.914689	1	0.522544	0.73963	0.938585
circASAP2_4	chr3	135350240	135366829	-	6	ENSSSCT00000009454.2	ASAP2	7,6,5,4,3,2	chr3:135341697-135350240|chr3:135366829-135379416	0	0	1	0	2	7	0	0	0	1	0	0	0	0	151.128	0	233.274	819.498	0	0	0	284.243	0	0	-2.12674	0.240268	0.651868	2.1497	0.183132	0.633079	1.73718	0.338563	0.616461	-2.53925	0.144401	0.578381
circASAP2_5	chr3	135358107	135366829	-	4	ENSSSCT00000009454.2	ASAP2	5,4,3,2	chr3:135350662-135358107|chr3:135366829-135379416	0	0	1	2	1	4	4	0	0	1	0	0	0	0	151.128	240.703	116.637	468.284	309.821	0	0	284.243	0	0	-1.73105	0.252888	0.651868	-0.660405	0.669074	0.930465	1.41481	0.35467	0.622068	0.344171	0.820324	0.984756
circASB1	chr15	152385965	152396274	+	3	ENSSSCT00000017795.2	ASB1	2,3,4	chr15:152383073-152385965|chr15:152396274-152397969	0	0	0	3	4	0	2	0	0	0	0	2	0	0	0	361.054	466.549	0	154.911	0	0	0	0	484.524	-3.94668	0.0644964	0.523467	-2.04824	0.290185	0.698704	0.634559	0.702999	0.877458	-1.26388	0.462767	0.734227
circASB4	chr9	82559275	82559766	+	1	ENSSSCT00000016706.2	ASB4	3	chr9:82498919-82559275|chr9:82559766-82578421	0	0	0	0	2	0	0	1	0	0	0	2	0	0	0	0	233.274	0	0	121.365	0	0	0	484.524	-2.34393	0.312383	0.704078	-1.60579	0.433882	0.783793	-0.932684	0.698986	0.875266	-1.67083	0.48441	0.752933
circASXL2	chr3	120136071	120141921	+	3	ENSSSCT00000009382.2	ASXL2	5,6,7	chr3:120085560-120136071|chr3:120141921-120151929	0	1	1	0	1	0	3	2	1	0	0	0	0	317.991	151.128	0	116.637	0	232.366	242.731	132.894	0	0	0	1.54241	0.263489	0.655369	-0.417307	0.701216	0.943666	1.61156	0.396738	0.666549	3.57127	0.0528178	0.473818
circASXL2_2	chr3	120136071	120155720	+	5	ENSSSCT00000009382.2	ASXL2	5,6,7,8,9	chr3:120085560-120136071|chr3:120155720-120158827	1	0	0	0	0	0	4	2	2	0	0	2	286.316	0	0	0	0	0	309.821	242.731	265.788	0	0	484.524	2.3762	0.152105	0.622196	-1.56697	0.274889	0.688831	-3.34263	0.0433586	0.337211	0.600544	0.646263	0.868943
circATAD1	chr14	108816382	108826406	-	3	ENSSSCT00000011423.2	ATAD1	8,7,6	chr14:108800172-108816382|chr14:108826406-108846677	1	0	3	2	4	4	5	3	8	1	0	3	286.316	0	453.383	240.703	466.549	468.284	387.276	364.096	1063.15	284.243	0	726.785	-0.412809	0.65981	0.928888	-0.957966	0.281441	0.693863	0.135267	0.885964	1	0.680424	0.44657	0.732388
circATAD2	chr4	16767206	16779552	+	7	ENSSSCT00000006566.2	ATAD2	2,3,4,5,6,7,8	chr4:16756131-16767206|chr4:16779552-16785782	0	0	2	4	2	2	1	1	0	1	1	0	0	0	302.256	481.405	233.274	234.142	77.4553	121.365	0	284.243	290.72	0	-1.03076	0.347935	0.730496	0.88739	0.49106	0.811421	0.734623	0.508257	0.719155	-1.18352	0.370425	0.697564
circATAD2_2	chr4	16777416	16778684	+	2	ENSSSCT00000006566.2	ATAD2	6,7	chr4:16777170-16777416|chr4:16778684-16779434	2	0	0	0	2	5	1	3	2	1	4	0	572.633	0	0	0	233.274	585.355	77.4553	364.096	265.788	284.243	1162.88	0	-0.644408	0.638714	0.915664	-0.391613	0.777364	0.979964	-0.73678	0.554902	0.765517	-0.989575	0.431548	0.729046
circATAD2_3	chr4	16785782	16789839	+	3	ENSSSCT00000006566.2	ATAD2	9,10,11	chr4:16779552-16785782|chr4:16789839-16793505	0	0	1	0	0	0	4	1	0	0	0	0	0	0	151.128	0	0	0	309.821	121.365	0	0	0	0	2.1068	0.22141	0.651868	-1.03624	0.61042	0.894367	0	1	1	3.14304	0.183345	0.606245
circATAD2_4	chr4	16798422	16799495	+	2	ENSSSCT00000006566.2	ATAD2	15,16	chr4:16797444-16798422|chr4:16799495-16800618	0	0	0	0	2	1	0	0	0	0	0	0	0	0	0	0	233.274	117.071	0	0	0	0	0	0	-2.83131	0.255369	0.651868	0	1	1	2.83131	0.275932	0.564331	0	1	1
circATE1	chr14	142837281	142857217	-	6	ENSSSCT00000011705.2	ATE1	8,7,6,5,4,3	chr14:142804005-142837281|chr14:142857217-142859377	6	4	19	6	5	12	6	5	4	0	0	0	1717.9	1271.96	2871.43	722.108	583.186	1404.85	464.732	606.827	531.576	0	0	0	1.17426	0.0351457	0.45914	1.93001	0.0010646	0.0686256	5.59324	0.000189337	0.0244098	4.8375	0.00304793	0.182441
circATE1_2	chr14	142803972	142857217	-	7	ENSSSCT00000011705.2	ATE1	9,8,7,6,5,4,3	chr14:142779142-142803972|chr14:142857217-142859377	1	0	3	11	9	17	2	3	0	3	1	2	286.316	0	453.383	1323.86	1049.73	1990.21	154.911	364.096	0	852.728	290.72	484.524	-2.23386	0.00256771	0.246566	0.694927	0.475005	0.805564	1.3945	0.0423941	0.337211	-1.53429	0.0888018	0.533236
circATE1_3	chr14	142837281	142854338	-	5	ENSSSCT00000011705.2	ATE1	8,7,6,5,4	chr14:142804005-142837281|chr14:142854338-142857153	0	0	3	0	0	0	1	0	0	1	0	0	0	0	453.383	0	0	0	77.4553	0	0	284.243	0	0	3.31181	0.100411	0.581337	1.96928	0.344975	0.732063	-2.54944	0.188917	0.515951	-1.2069	0.581795	0.819402
circATE1_4	chr14	142775863	142857217	-	9	ENSSSCT00000011705.2	ATE1	11,10,9,8,7,6,5,4,3	chr14:142735222-142775863|chr14:142857217-142859377	2	0	5	6	12	25	3	2	1	6	0	0	572.633	0	755.639	722.108	1399.65	2926.78	232.366	242.731	132.894	1705.46	0	0	-1.73999	0.0458022	0.477033	1.17633	0.238465	0.674014	1.57406	0.0752648	0.395435	-1.34227	0.189813	0.606976
circATE1_5	chr14	142840672	142854338	-	4	ENSSSCT00000011705.2	ATE1	7,6,5,4	chr14:142837410-142840672|chr14:142854338-142857153	1	0	0	1	0	0	1	0	0	0	0	0	286.316	0	0	120.351	0	0	77.4553	0	0	0	0	0	0.888922	0.716114	0.949028	1.19275	0.622093	0.900204	1.62515	0.455623	0.689477	1.32132	0.502928	0.766628
circATE1_6	chr14	142840672	142857217	-	5	ENSSSCT00000011705.2	ATE1	7,6,5,4,3	chr14:142837410-142840672|chr14:142857217-142859377	8	0	11	12	12	17	7	1	1	0	4	1	2290.53	0	1662.41	1444.22	1399.65	1990.21	542.187	121.365	132.894	0	1162.88	242.262	-0.235837	0.740897	0.951938	2.15521	0.00767986	0.233202	1.77788	0.0360872	0.325173	-0.613166	0.526959	0.776424
circATE1_7	chr14	142847988	142857217	-	4	ENSSSCT00000011705.2	ATE1	6,5,4,3	chr14:142840902-142847988|chr14:142857217-142859377	0	4	8	1	2	0	6	6	0	0	0	1	0	1271.96	1209.02	120.351	233.274	0	464.732	728.192	0	0	0	242.262	2.65769	0.0266476	0.442193	1.03064	0.336005	0.726238	0.351712	0.82584	0.975411	1.97876	0.171502	0.601796
circATF7IP	chr5	61500661	61514489	-	4	ENSSSCT00000022782.1	ATF7IP	5,4,3,2	chr5:61488161-61500661|chr5:61514489-61571296	0	0	4	0	0	0	3	1	5	1	2	4	0	0	604.511	0	0	0	232.366	121.365	664.47	284.243	581.441	969.047	3.89634	0.0105178	0.344828	-0.28639	0.79737	0.988905	-5.06608	0.000518777	0.0457616	-0.883345	0.379353	0.707619
circATF7IP_2	chr5	61467035	61475967	-	4	ENSSSCT00000000658.2	ATF7IP	10,9,8,7	chr5:61459831-61467035|chr5:61475967-61488095	6	2	14	6	9	9	43	21	12	5	3	7	1717.9	635.982	2115.79	722.108	1049.73	1053.64	3330.58	2548.67	1594.73	1421.21	872.161	1695.83	0.743036	0.177118	0.634312	-0.667552	0.176771	0.627269	-0.504219	0.389899	0.660071	0.906369	0.0842401	0.526829
circATF7IP_3	chr5	61472061	61475967	-	3	ENSSSCT00000000658.2	ATF7IP	9,8,7	chr5:61467100-61472061|chr5:61475967-61488095	0	0	0	0	0	1	0	4	0	1	0	0	0	0	0	0	0	117.071	0	485.461	0	284.243	0	0	-1.60678	0.435208	0.764179	-3.22624	0.213772	0.657732	-0.94828	0.700347	0.875751	0.671183	0.793624	0.972391
circATF7IP_4	chr5	61500661	61504828	-	3	ENSSSCT00000000658.2	ATF7IP	5,4,3	chr5:61488161-61500661|chr5:61504828-61512906	0	1	5	11	16	5	9	2	4	1	2	2	0	317.991	755.639	1323.86	1866.19	585.355	697.097	242.731	531.576	284.243	581.441	484.524	-1.51247	0.0403954	0.463021	-0.234812	0.77112	0.975493	1.443	0.0593519	0.383302	0.165345	0.842553	0.994957
circATF7IP_5	chr5	61457867	61459831	-	2	ENSSSCT00000000658.2	ATF7IP	12,11	chr5:61454332-61457867|chr5:61459831-61467035	0	0	3	0	1	0	2	1	4	3	0	0	0	0	453.383	0	116.637	0	154.911	121.365	531.576	852.728	0	0	1.8435	0.234474	0.651868	-0.424815	0.76641	0.973941	-2.34746	0.138835	0.489478	-0.0791404	0.954434	1
circATG16L1	chr15	147691479	147697328	-	3	ENSSSCT00000017750.2	ATG16L1	12,11,10	chr15:147682059-147691479|chr15:147697328-147699283	0	0	1	0	0	0	1	5	0	0	0	1	0	0	151.128	0	0	0	77.4553	606.827	0	0	0	242.262	2.1242	0.211285	0.651837	-1.55364	0.427386	0.783793	-2.45883	0.17456	0.508992	1.21901	0.534825	0.781829
circATG2B	chr7	124821064	124821420	-	2	ENSSSCT00000002780.2	ATG2B	10,9	chr7:124820226-124821064|chr7:124821420-124822563	0	1	1	3	3	1	2	1	0	0	3	0	0	317.991	151.128	361.054	349.911	117.071	154.911	121.365	0	0	872.161	0	-0.786861	0.52704	0.83444	0.514938	0.704268	0.944142	-0.00665644	0.996404	1	-1.30846	0.304961	0.661636
circATG2B_2	chr7	124821064	124828826	-	6	ENSSSCT00000002780.2	ATG2B	10,9,8,7,6,5	chr7:124820226-124821064|chr7:124828826-124831374	2	1	0	5	0	1	1	0	2	0	0	0	572.633	317.991	0	601.756	0	117.071	77.4553	0	265.788	0	0	0	0.166646	0.914404	1	1.16273	0.453356	0.797092	3.75208	0.0823959	0.415661	2.756	0.199141	0.608094
circATG4C	chr6	137844859	137861689	-	5	ENSSSCT00000004223.2	ATG4C	6,5,4,3,2	chr6:137838859-137844859|chr6:137861689-137886564	0	0	2	9	12	5	17	13	13	1	6	8	0	0	302.256	1083.16	1399.65	585.355	1316.74	1577.75	1727.62	284.243	1744.32	1938.09	-2.65227	0.00298276	0.256365	-3.22104	0.00014231	0.019876	-0.38495	0.52608	0.737832	0.183817	0.751662	0.946925
circATG7	chr13	74656935	74736227	+	17	ENSSSCT00000012667.2	ATG7	2,3,4,5,6,7,8,9,10,11,12,13,14,15,16,17,18	chr13:74637056-74656935|chr13:74736227-74799940	0	0	0	3	0	0	0	0	1	0	0	0	0	0	0	361.054	0	0	0	0	132.894	0	0	0	-2.86207	0.235662	0.651868	-1.66045	0.420436	0.783142	2.86207	0.256886	0.564331	1.66045	0.446859	0.732388
circATP11C	chrX	130750806	130755789	-	3	ENSSSCT00000013899.2	ATP11C	5,4,3	chrX:130737665-130750806|chrX:130755789-130763598	0	0	0	2	0	1	5	3	0	0	0	0	0	0	0	240.703	0	117.071	387.276	364.096	0	0	0	0	-2.84878	0.152574	0.622196	-3.8615	0.0511282	0.443552	2.84878	0.17838	0.508992	3.8615	0.0643779	0.497765
circATP11C_2	chrX	130750806	130763718	-	4	ENSSSCT00000013899.2	ATP11C	5,4,3,2	chrX:130737665-130750806|chrX:130763718-130769590	0	2	1	4	9	0	4	1	7	0	0	2	0	635.982	151.128	481.405	1049.73	0	309.821	121.365	930.259	0	0	484.524	-1.0203	0.425001	0.762693	-0.829542	0.518455	0.82885	1.45719	0.280357	0.569205	1.26643	0.350889	0.680879
circATP13A1	chr2	58424318	58424714	-	2	ENSSSCT00000015216.2	ATP13A1	3,2	chr2:58422605-58424318|chr2:58424714-58427423	0	0	2	1	2	3	0	1	2	0	0	2	0	0	302.256	120.351	233.274	351.213	0	121.365	265.788	0	0	484.524	-0.706005	0.589953	0.880856	0.223822	0.857839	1	0.389335	0.766997	0.927815	-0.540492	0.689875	0.904511
circATP13A3	chr13	140978249	140999525	-	14	ENSSSCT00000012937.2	ATP13A3	17,16,15,14,13,12,11,10,9,8,7,6,5,4	chr13:140977449-140978249|chr13:140999525-141000218	1	4	1	0	1	1	3	0	4	0	0	0	286.316	1271.96	151.128	0	116.637	117.071	232.366	0	531.576	0	0	0	2.4825	0.0640882	0.523467	1.01681	0.401663	0.770955	2.35033	0.253609	0.564331	3.81601	0.0603762	0.492411
circATP1A2	chr4	98306907	98307275	-	2	ENSSSCT00000007004.2	ATP1A2	3,2	chr4:98304534-98306907|chr4:98307275-98312278	6	4	10	12	10	11	34	13	8	2	0	4	1717.9	1271.96	1511.28	1444.22	1166.37	1287.78	2633.48	1577.75	1063.15	568.485	0	969.047	0.211158	0.69874	0.94366	-0.265627	0.610607	0.894367	1.24634	0.0682642	0.39249	1.72313	0.00829177	0.268396
circATP2A1	chr3	18739594	18744613	+	4	ENSSSCT00000008553.1	ATP2A1	7,8,9,10	chr3:18738775-18739594|chr3:18744613-18745175	0	0	0	0	2	1	0	0	0	0	1	0	0	0	0	0	233.274	117.071	0	0	0	0	290.72	0	-2.83177	0.233788	0.651868	0	1	1	0.264239	0.908542	1	-2.56753	0.185585	0.606621
circATP2A1_2	chr3	18744524	18745665	+	3	ENSSSCT00000008553.1	ATP2A1	10,11,12	chr3:18741223-18744524|chr3:18745665-18748538	4	2	20	3	8	17	26	15	15	4	2	5	1145.27	635.982	3022.56	361.054	933.097	1990.21	2013.84	1820.48	1993.41	1136.97	581.441	1211.31	0.652748	0.314712	0.704078	-0.162095	0.795806	0.988345	0.151884	0.832556	0.978516	0.966727	0.160897	0.599175
circATP2A1_3	chr3	18744524	18750515	+	6	ENSSSCT00000008553.1	ATP2A1	10,11,12,13,14,15	chr3:18741223-18744524|chr3:18750515-18750993	0	0	1	2	1	6	2	1	0	1	2	1	0	0	151.128	240.703	116.637	702.427	154.911	121.365	0	284.243	581.441	242.262	-2.02521	0.117746	0.599738	-0.395215	0.78585	0.983265	-0.0372909	0.971315	1	-1.66728	0.150389	0.584118
circATP2A1_4	chr3	18745175	18745665	+	2	ENSSSCT00000008553.1	ATP2A1	11,12	chr3:18744613-18745175|chr3:18745665-18748538	0	0	1	0	1	0	2	0	1	0	1	1	0	0	151.128	0	116.637	0	154.911	0	132.894	0	290.72	242.262	0.63752	0.686927	0.942654	-0.40982	0.783992	0.98275	-1.76821	0.236161	0.557474	-0.720869	0.593208	0.825923
circATP5A1	chr1	105950019	105950799	+	3	ENSSSCT00000004971.1	ATP5A1	3,4,5	chr1:105947272-105950019|chr1:105950799-105951341	0	0	0	0	2	2	2	1	0	0	0	0	0	0	0	0	233.274	234.142	154.911	121.365	0	0	0	0	-3.19916	0.105057	0.581337	-2.6219	0.176917	0.627269	3.19916	0.126752	0.466893	2.6219	0.205428	0.609916
circATP5A1_2	chr1	105951341	105951833	+	2	ENSSSCT00000004971.1	ATP5A1	6,7	chr1:105950799-105951341|chr1:105951833-105954319	0	0	2	0	1	2	4	1	1	0	0	1	0	0	302.256	0	116.637	234.142	309.821	121.365	132.894	0	0	242.262	0.220294	0.860898	1	-0.458216	0.709968	0.94656	0.339277	0.821506	0.973771	1.01779	0.466778	0.734736
circATP5B	chr5	23660896	23661707	-	2	ENSSSCT00000033906.1	ATP5B	9,8	chr5:23659341-23660896|chr5:23661707-23663519	0	0	0	3	5	2	11	0	0	0	0	7	0	0	0	361.054	583.186	234.142	852.008	0	0	0	0	1695.83	-4.42928	0.0393761	0.45914	-4.06586	0.0559349	0.460113	-0.54176	0.720277	0.890254	-0.905181	0.549466	0.7932
circATP6V0A2	chr14	30974160	30982848	-	5	ENSSSCT00000010708.3	ATP6V0A2	6,5,4,3,2	chr14:30968495-30974160|chr14:30982848-30989648	2	1	3	3	5	13	9	0	0	0	1	0	572.633	317.991	453.383	361.054	583.186	1521.92	697.097	0	0	0	290.72	0	-0.841433	0.42171	0.762693	0.729157	0.508548	0.818548	2.9296	0.0299957	0.302848	1.35901	0.340318	0.674952
circATP6V1C1	chr4	36900161	36908903	-	6	ENSSSCT00000006643.2	ATP6V1C1	8,7,6,5,4,3	chr4:36892577-36900161|chr4:36908903-36916141	2	1	1	5	3	1	4	3	2	0	6	1	572.633	317.991	151.128	601.756	349.911	117.071	309.821	364.096	265.788	0	1744.32	242.262	-0.150099	0.88308	1	0.0191246	0.987432	1	-0.827581	0.385065	0.653538	-0.996804	0.296532	0.656761
circATP7A	chrX	70994645	71001396	+	5	ENSSSCT00000032884.1	ATP7A	7,8,9,10,11	chrX:70991486-70994645|chrX:71001396-71003030	0	3	0	2	2	0	3	0	0	0	0	0	0	953.973	0	240.703	233.274	0	232.366	0	0	0	0	0	0.825674	0.662133	0.930724	1.58245	0.40401	0.771131	3.20999	0.171859	0.508992	2.45321	0.269162	0.651471
circATP9A	chr17	59429156	59439777	-	3	ENSSSCT00000008185.2	ATP9A	14,13,12	chr17:59416139-59429156|chr17:59439777-59442208	0	0	1	2	1	11	7	4	0	0	0	0	0	0	151.128	240.703	116.637	1287.78	542.187	485.461	0	0	0	0	-2.69305	0.0794166	0.545501	-2.08173	0.177963	0.627269	4.89239	0.0158203	0.231324	4.28107	0.0370778	0.443875
circATP9A_2	chr17	59438247	59439777	-	2	ENSSSCT00000008185.2	ATP9A	13,12	chr17:59429369-59438247|chr17:59439777-59442208	0	0	4	0	0	0	3	2	0	0	0	1	0	0	604.511	0	0	0	232.366	242.731	0	0	0	242.262	3.73429	0.0391215	0.45914	0.485159	0.761325	0.971947	-2.46585	0.164778	0.505339	0.783278	0.669601	0.891986
circATP9A_3	chr17	59438247	59456350	-	6	ENSSSCT00000008185.2	ATP9A	13,12,11,10,9,8	chr17:59429369-59438247|chr17:59456350-59459863	3	0	7	1	5	2	17	5	10	4	1	1	858.949	0	1057.89	120.351	583.186	234.142	1316.74	606.827	1328.94	1136.97	290.72	242.262	1.13878	0.153536	0.622196	-0.601817	0.381831	0.764073	-0.760625	0.385798	0.654451	0.979975	0.192911	0.606976
circATP9A_4	chr17	59454682	59464069	-	5	ENSSSCT00000008185.2	ATP9A	9,8,7,6,5	chr17:59445461-59454682|chr17:59464069-59478777	0	3	3	1	4	2	4	1	1	0	0	2	0	953.973	453.383	120.351	466.549	234.142	309.821	121.365	132.894	0	0	484.524	0.696058	0.473194	0.791095	1.11262	0.260865	0.679981	0.581785	0.622397	0.822574	0.165221	0.890016	1
circATP9A_5	chr17	59478777	59484993	-	3	ENSSSCT00000008185.2	ATP9A	4,3,2	chr17:59464069-59478777|chr17:59484993-59513861	3	2	23	4	8	5	9	11	8	0	2	3	858.949	635.982	3475.94	481.405	933.097	585.355	697.097	1335.02	1063.15	0	581.441	726.785	1.41848	0.0383741	0.45914	0.827516	0.20718	0.65421	0.559189	0.518089	0.729985	1.15015	0.165913	0.601796
circATR	chr13	91070337	91074476	-	4	ENSSSCT00000012786.2	ATR	12,11,10,9	chr13:91069866-91070337|chr13:91074476-91075361	0	0	0	2	4	0	0	2	0	0	0	0	0	0	0	240.703	466.549	0	0	242.731	0	0	0	0	-3.73663	0.105251	0.581337	-2.34224	0.270352	0.685027	3.73663	0.120814	0.460419	2.34224	0.297505	0.656925
circATRN	chr17	36419115	36449044	-	5	ENSSSCT00000007826.2	ATRN	25,24,23,22,21	chr17:36402917-36419115|chr17:36449044-36451567	0	2	0	0	0	0	4	3	0	0	0	0	0	635.982	0	0	0	0	309.821	364.096	0	0	0	0	3.47935	0.0866241	0.561985	-0.209361	0.914413	1	0	1	1	3.68871	0.135773	0.57572
circATRN_2	chr17	36439070	36454536	-	6	ENSSSCT00000007826.2	ATRN	24,23,22,21,20,19	chr17:36419177-36439070|chr17:36454536-36462021	0	1	1	2	0	0	5	3	0	0	0	0	0	317.991	151.128	240.703	0	0	387.276	364.096	0	0	0	0	0.801655	0.611852	0.896568	-0.69391	0.635688	0.906221	2.36443	0.259844	0.564331	3.85999	0.0662659	0.500822
circATRN_3	chr17	36500875	36512513	-	4	ENSSSCT00000007826.2	ATRN	6,5,4,3	chr17:36487214-36500875|chr17:36512513-36516285	2	0	4	1	4	6	3	3	4	1	0	0	572.633	0	604.511	120.351	466.549	702.427	232.366	364.096	531.576	284.243	0	0	0.011202	0.988357	1	0.25723	0.768777	0.975006	2.03797	0.0991477	0.440217	1.79194	0.154509	0.590383
circATRNL1	chr14	136612214	136622206	+	4	ENSSSCT00000032203.1	ATRNL1	2,3,4,5	chr14:136580507-136612214|chr14:136622206-136640071	0	0	1	1	2	3	4	5	1	0	0	1	0	0	151.128	120.351	233.274	351.213	309.821	606.827	132.894	0	0	242.262	-1.46562	0.265049	0.656675	-2.00064	0.107652	0.561694	1.23132	0.35914	0.625837	1.76633	0.16425	0.601565
circATRNL1_2	chr14	136612214	136651646	+	7	ENSSSCT00000032203.1	ATRNL1	2,3,4,5,6,7,8	chr14:136580507-136612214|chr14:136651646-136683517	0	0	0	1	0	2	1	2	0	0	0	0	0	0	0	120.351	0	234.142	77.4553	242.731	0	0	0	0	-2.84303	0.159149	0.622196	-2.7129	0.175769	0.62612	2.84303	0.184695	0.50983	2.7129	0.202712	0.609866
circATRNL1_3	chr14	136683517	136734852	+	5	ENSSSCT00000032203.1	ATRNL1	9,10,11,12,13	chr14:136651646-136683517|chr14:136734852-136738981	0	0	0	2	1	3	1	0	1	0	0	0	0	0	0	240.703	116.637	351.213	77.4553	0	132.894	0	0	0	-3.73811	0.0337404	0.45914	-2.21555	0.226663	0.664563	3.73811	0.0470302	0.345713	2.21555	0.260861	0.647709
circATXN2	chr14	34693426	34697216	-	4	ENSSSCT00000031994.1	ATXN2	13,12,11,10	chr14:34676618-34693426|chr14:34697216-34701541	0	1	0	0	2	1	0	0	1	0	0	0	0	317.991	0	0	233.274	117.071	0	0	132.894	0	0	0	-0.344885	0.843297	0.996861	0.880355	0.641156	0.908744	2.83393	0.201428	0.532889	1.60869	0.426836	0.729046
circATXN2_2	chr14	34696914	34732614	-	14	ENSSSCT00000010778.2	ATXN2	15,14,13,12,11,10,9,8,7,6,5,4,3,2	chr14:34695463-34696914|chr14:34732614-34767145	0	0	1	0	4	0	0	1	0	0	0	0	0	0	151.128	0	466.549	0	0	121.365	0	0	0	0	-1.16047	0.657781	0.9272	0.423072	0.846348	1	3.19283	0.241562	0.55997	1.6093	0.465541	0.734227
circATXN2_3	chr14	34717480	34729763	-	2	ENSSSCT00000010778.2	ATXN2	6,5	chr14:34713298-34717480|chr14:34729763-34730873	3	0	0	3	0	4	0	6	0	0	0	0	858.949	0	0	361.054	0	468.284	0	728.192	0	0	0	0	-0.0105154	0.994158	1	0.185582	0.923358	1	3.94929	0.105508	0.451101	3.75319	0.121997	0.572872
circATXN2_4	chr14	34729612	34732614	-	4	ENSSSCT00000010778.2	ATXN2	5,4,3,2	chr14:34717605-34729612|chr14:34732614-34767145	3	0	15	15	14	11	30	6	9	0	3	1	858.949	0	2266.92	1805.27	1632.92	1287.78	2323.66	728.192	1196.05	0	872.161	242.262	-0.424665	0.558724	0.856744	-0.302663	0.675844	0.933428	2.05785	0.0205443	0.258889	1.93585	0.0291711	0.426251
circATXN2L	chr3	18698105	18698559	+	2	ENSSSCT00000029453.1	ATXN2L	9,10	chr3:18697072-18698105|chr3:18698559-18699389	1	3	8	8	7	1	8	6	5	0	4	0	286.316	953.973	1209.02	962.81	816.46	117.071	619.642	728.192	664.47	0	1162.88	0	0.437934	0.5629	0.859218	0.358417	0.631125	0.9038	0.750898	0.4089	0.670375	0.830414	0.355396	0.681666
circAVL9	chr18	44782111	44796486	+	11	ENSSSCT00000029825.1	AVL9	2,3,4,5,6,7,8,9,10,11,12	chr18:44753509-44782111|chr18:44796486-44805457	0	0	3	1	0	0	0	0	0	2	0	1	0	0	453.383	120.351	0	0	0	0	0	568.485	0	242.262	1.77929	0.293961	0.684752	3.39917	0.0466527	0.437012	-2.30081	0.186627	0.511589	-3.92069	0.0274171	0.426251
circAZI2	chr13	16467578	16473811	-	3	ENSSSCT00000030647.1	AZI2	6,5,4	chr13:16461276-16467578|chr13:16473811-16474531	0	1	0	1	1	1	3	0	0	0	0	0	0	317.991	0	120.351	116.637	117.071	232.366	0	0	0	0	0	-0.407561	0.797887	0.976065	-0.0895382	0.940198	1	2.84217	0.178596	0.508992	2.52415	0.221557	0.617332
circAZIN1	chr4	37102479	37103948	+	3	ENSSSCT00000024569.1	AZIN1	6,7,8	chr4:37102004-37102479|chr4:37103948-37105765	0	2	6	3	6	5	11	7	0	0	7	1	0	635.982	906.767	361.054	699.823	585.355	852.008	849.557	0	0	2035.04	242.262	0.00757646	0.992412	1	-0.0783425	0.93646	1	-0.42201	0.668207	0.85555	-0.336091	0.730157	0.932522
circAZIN1_2	chr4	37102479	37106561	+	5	ENSSSCT00000024569.1	AZIN1	6,7,8,9,10	chr4:37102004-37102479|chr4:37106561-37107247	0	0	0	2	0	4	2	0	4	0	0	0	0	0	0	240.703	0	468.284	154.911	0	531.576	0	0	0	-3.73921	0.0800889	0.548994	-3.66823	0.085624	0.530612	3.73921	0.095421	0.434811	3.66823	0.101712	0.549899
circB3GLCT	chr11	7808773	7822810	+	4	ENSSSCT00000010230.2	B3GLCT	4,5,6,7	chr11:7796183-7808773|chr11:7822810-7829087	0	0	0	0	0	0	3	0	0	0	0	0	0	0	0	0	0	0	232.366	0	0	0	0	0	0	1	1	-2.39927	0.31381	0.708347	0	1	1	2.39927	0.336125	0.672453
circB3GNTL1	chr12	444013	447000	-	2	ENSSSCT00000025124.1	B3GNTL1	6,5	chr12:425926-444013|chr12:447000-457444	1	3	8	3	0	0	4	0	3	0	0	3	286.316	953.973	1209.02	361.054	0	0	309.821	0	398.682	0	0	726.785	2.63543	0.0296136	0.457043	1.73641	0.12314	0.580899	-1.01045	0.455966	0.689477	-0.111423	0.929355	1
circB3GNTL1_2	chr12	444013	457509	-	3	ENSSSCT00000025124.1	B3GNTL1	6,5,4	chr12:425926-444013|chr12:457509-476657	0	0	6	3	2	2	0	0	1	0	0	0	0	0	906.767	361.054	233.274	234.142	0	0	132.894	0	0	0	0.387381	0.744188	0.953584	2.76897	0.048077	0.441573	3.94721	0.0523586	0.365638	1.56562	0.421211	0.729046
circBAG1	chr10	37486612	37488301	+	2	ENSSSCT00000012037.2	BAG1	2,3	chr10:37485085-37486612|chr10:37488301-37491246	1	1	6	3	7	1	1	0	0	0	0	0	286.316	317.991	906.767	361.054	816.46	117.071	77.4553	0	0	0	0	0	0.334266	0.732687	0.949643	3.44288	0.00567083	0.196288	4.56002	0.0144196	0.22716	1.4514	0.432994	0.729046
circBAG1_2	chr10	37486612	37494346	+	4	ENSSSCT00000012037.2	BAG1	2,3,4,5	chr10:37485085-37486612|chr10:37494346-37495861	0	1	1	7	6	11	4	3	0	0	0	1	0	317.991	151.128	842.459	699.823	1287.78	309.821	364.096	0	0	0	242.262	-2.49894	0.00699172	0.321044	-0.601072	0.58209	0.875951	3.1454	0.00329677	0.132179	1.24753	0.330398	0.672453
circBAG1_3	chr10	37486612	37495924	+	5	ENSSSCT00000012037.2	BAG1	2,3,4,5,6	chr10:37485085-37486612|chr10:37495924-37496837	3	0	0	0	1	9	0	0	1	0	0	0	858.949	0	0	0	116.637	1053.64	0	0	132.894	0	0	0	-0.484208	0.794497	0.974444	2.306	0.240037	0.674014	4.42083	0.0707824	0.393433	1.63062	0.432525	0.729046
circBARD1	chr15	129615578	129639319	-	5	ENSSSCT00000017605.2	BARD1	14,13,12,11,10	chr15:129597144-129615578|chr15:129639319-129641123	3	1	3	0	6	3	2	0	0	0	0	0	858.949	317.991	453.383	0	699.823	351.213	154.911	0	0	0	0	0	0.590097	0.598598	0.886656	2.75434	0.0304127	0.395014	4.27709	0.0296951	0.302848	2.11285	0.288493	0.653682
circBAZ1A	chr7	69874054	69882364	+	4	ENSSSCT00000002190.2	BAZ1A	17,18,19,20	chr7:69870824-69874054|chr7:69882364-69885327	0	0	0	0	3	0	1	0	0	0	0	0	0	0	0	0	349.911	0	77.4553	0	0	0	0	0	-2.83028	0.243924	0.651868	-1.32616	0.47221	0.804873	2.83028	0.265094	0.564331	1.32616	0.498734	0.764058
circBAZ1B	chr3	10470261	10488752	-	5	ENSSSCT00000030732.1	BAZ1B	14,13,12,11,10	chr3:10468862-10470261|chr3:10488752-10491398	0	0	3	0	1	2	0	0	1	0	0	0	0	0	453.383	0	116.637	234.142	0	0	132.894	0	0	0	0.540989	0.747989	0.953584	1.75987	0.316661	0.709238	2.83461	0.207243	0.540186	1.61573	0.428369	0.729046
circBAZ1B_2	chr3	10470261	10492534	-	7	ENSSSCT00000030732.1	BAZ1B	14,13,12,11,10,9,8	chr3:10468862-10470261|chr3:10492534-10501005	0	0	0	0	0	3	0	0	0	0	0	0	0	0	0	0	0	351.213	0	0	0	0	0	0	-2.83389	0.255036	0.651868	0	1	1	2.83389	0.275588	0.564331	0	1	1
circBAZ1B_3	chr3	10479904	10492534	-	6	ENSSSCT00000030732.1	BAZ1B	13,12,11,10,9,8	chr3:10470409-10479904|chr3:10492534-10501005	0	0	3	3	0	3	1	0	0	0	0	0	0	0	453.383	361.054	0	351.213	77.4553	0	0	0	0	0	-0.338024	0.834447	0.995838	2.01152	0.226808	0.664563	3.74374	0.0910592	0.427861	1.39419	0.456115	0.734227
circBAZ1B_4	chr3	10513861	10528960	-	4	ENSSSCT00000030732.1	BAZ1B	6,5,4,3	chr3:10502707-10513861|chr3:10528960-10534598	0	0	0	0	2	0	2	0	2	0	0	0	0	0	0	0	233.274	0	154.911	0	265.788	0	0	0	-2.3453	0.276552	0.668445	-3.05484	0.180549	0.631114	2.3453	0.302952	0.587318	3.05484	0.201815	0.609331
circBAZ2B	chr15	73508751	73510057	-	2	ENSSSCT00000017294.2	BAZ2B	25,24	chr15:73495671-73508751|chr15:73510057-73516666	0	0	1	0	0	0	5	0	1	0	1	0	0	0	151.128	0	0	0	387.276	0	132.894	0	290.72	0	2.13248	0.20678	0.650936	-1.25274	0.507646	0.818548	-2.55308	0.162557	0.505226	0.832136	0.658846	0.882065
circBAZ2B_2	chr15	73508751	73516910	-	3	ENSSSCT00000017294.2	BAZ2B	25,24,23	chr15:73495671-73508751|chr15:73516910-73518352	0	1	0	3	2	0	3	4	0	0	0	0	0	317.991	0	361.054	233.274	0	232.366	485.461	0	0	0	0	-1.06661	0.504538	0.813865	-1.33245	0.398813	0.769078	3.50216	0.0971349	0.437332	3.76801	0.0719474	0.508793
circBAZ2B_3	chr15	73509994	73516910	-	2	ENSSSCT00000017294.2	BAZ2B	24,23	chr15:73508896-73509994|chr15:73516910-73518352	0	1	2	3	0	6	1	0	1	0	2	1	0	317.991	302.256	361.054	0	702.427	77.4553	0	132.894	0	581.441	242.262	-0.654593	0.587269	0.878408	1.41756	0.294151	0.701214	0.359152	0.765487	0.926991	-1.713	0.208923	0.611265
circBAZ2B_4	chr15	73518352	73557223	-	11	ENSSSCT00000017294.2	BAZ2B	22,21,20,19,18,17,16,15,14,13,12	chr15:73516910-73518352|chr15:73557223-73568822	0	0	0	0	3	0	2	2	0	0	0	0	0	0	0	0	349.911	0	154.911	242.731	0	0	0	0	-2.83124	0.211854	0.651837	-3.00252	0.189705	0.639087	2.83124	0.234715	0.555536	3.00252	0.211211	0.611265
circBAZ2B_5	chr15	73524172	73545942	-	4	ENSSSCT00000017294.2	BAZ2B	19,18,17,16	chr15:73520998-73524172|chr15:73545942-73548304	0	0	0	0	4	4	0	0	0	0	0	0	0	0	0	0	466.549	468.284	0	0	0	0	0	0	-4.11384	0.09362	0.569987	0	1	1	4.11384	0.106307	0.451499	0	1	1
circBAZ2B_6	chr15	73580842	73593612	-	5	ENSSSCT00000017294.2	BAZ2B	6,5,4,3,2	chr15:73573786-73580842|chr15:73593612-73618291	0	1	2	0	2	1	4	0	0	0	0	0	0	317.991	302.256	0	233.274	117.071	309.821	0	0	0	0	0	0.775463	0.615181	0.898121	0.77816	0.611134	0.894443	2.83483	0.188571	0.515571	2.83213	0.182716	0.606245
circBBS2	chr6	26453982	26462658	+	7	ENSSSCT00000024678.1	BBS2	4,5,6,7,8,9,10	chr6:26452450-26453982|chr6:26462658-26463429	0	2	1	2	2	1	0	0	4	0	0	0	0	635.982	151.128	240.703	233.274	117.071	0	0	531.576	0	0	0	0.294346	0.846355	0.997892	0.531167	0.724778	0.954204	3.49777	0.105088	0.450423	3.26095	0.132577	0.574282
circBBS2_2	chr6	26465041	26466884	+	3	ENSSSCT00000024678.1	BBS2	12,13,14	chr6:26463559-26465041|chr6:26466884-26472354	0	2	0	4	1	2	2	1	1	0	0	1	0	635.982	0	481.405	116.637	234.142	154.911	121.365	132.894	0	0	242.262	-0.694283	0.55728	0.855704	0.21255	0.873133	1	1.44843	0.287656	0.574588	0.541597	0.70849	0.917021
circBBS7	chr8	109416256	109421638	+	5	ENSSSCT00000009959.2	BBS7	3,4,5,6,7	chr8:109410845-109416256|chr8:109421638-109422762	1	0	3	4	4	3	2	2	4	0	0	0	286.316	0	453.383	481.405	466.549	351.213	154.911	242.731	531.576	0	0	0	-0.529469	0.544428	0.846439	0.0332592	0.967802	1	4.56261	0.00709902	0.180272	3.99988	0.0254124	0.415524
circBCAM	chr6	47202210	47203192	+	3	ENSSSCT00000035920.1	BCAM	5,6,7	chr6:47201731-47202210|chr6:47203192-47203663	0	0	1	0	1	1	3	0	0	0	0	0	0	0	151.128	0	116.637	117.071	232.366	0	0	0	0	0	-0.210818	0.919881	1	-0.331739	0.859183	1	2.34776	0.28368	0.57113	2.46868	0.256401	0.647009
circBCAT1	chr5	52588599	52591730	+	2	ENSSSCT00000026706.1	BCAT1	13,14	chr5:52582364-52588599|chr5:52591730-52594634	0	0	4	1	0	0	0	0	0	0	0	0	0	0	604.511	120.351	0	0	0	0	0	0	0	0	1.96873	0.511289	0.821105	3.5959	0.164654	0.621111	1.62716	0.484843	0.70173	0	1	1
circBCL2L13	chr5	72062876	72095416	+	3	ENSSSCT00000031909.1	BCL2L13	1,2,3	None|chr5:72095416-72099958	0	1	1	1	1	0	1	3	0	0	0	0	0	317.991	151.128	120.351	116.637	0	77.4553	364.096	0	0	0	0	0.805908	0.581025	0.872579	0.0694837	0.959054	1	2.35592	0.249821	0.564331	3.09234	0.130489	0.574282
circBCL2L13_2	chr5	72095259	72100028	+	2	ENSSSCT00000031909.1	BCL2L13	3,4	chr5:72090794-72095259|chr5:72100028-72107913	0	0	0	0	1	0	4	0	0	0	0	0	0	0	0	0	116.637	0	309.821	0	0	0	0	0	-1.60279	0.483811	0.79849	-2.70926	0.345885	0.732063	1.60279	0.504228	0.715568	2.70926	0.362952	0.691019
circBDP1	chr16	51757090	51761357	+	3	ENSSSCT00000018477.2	BDP1	4,5,6	chr16:51755488-51757090|chr16:51761357-51763729	0	0	1	2	2	3	2	0	0	2	0	0	0	0	151.128	240.703	233.274	351.213	154.911	0	0	568.485	0	0	-1.69152	0.212458	0.651837	0.108591	0.94405	1	0.546206	0.654188	0.845351	-1.25391	0.36839	0.695295
circBDP1_2	chr16	51757090	51763824	+	4	ENSSSCT00000018477.2	BDP1	4,5,6,7	chr16:51755488-51757090|chr16:51763824-51775687	0	2	6	7	3	9	4	4	1	1	1	5	0	635.982	906.767	842.459	349.911	1053.64	309.821	485.461	132.894	284.243	290.72	1211.31	-0.378822	0.624411	0.906403	0.830524	0.321391	0.712972	0.263147	0.738949	0.903569	-0.946199	0.270693	0.651471
circBDP1_3	chr16	51795727	51803278	+	5	ENSSSCT00000018477.2	BDP1	15,16,17,18,19	chr16:51794681-51795727|chr16:51803278-51805935	0	0	0	0	0	0	2	1	0	0	0	0	0	0	0	0	0	0	154.911	121.365	0	0	0	0	0	1	1	-2.56531	0.291445	0.698704	0	1	1	2.56531	0.313144	0.665182
circBDP1_4	chr16	51828981	51829999	+	2	ENSSSCT00000018477.2	BDP1	30,31	chr16:51827748-51828981|chr16:51829999-51830096	0	0	2	0	0	0	3	0	0	0	0	0	0	0	302.256	0	0	0	232.366	0	0	0	0	0	2.72053	0.296367	0.688442	0.353154	0.918525	1	0	1	1	2.36737	0.419474	0.729046
circBICC1	chr14	66861564	66887449	+	10	ENSSSCT00000011170.2	BICC1	6,7,8,9,10,11,12,13,14,15	chr14:66860715-66861564|chr14:66887449-66887999	0	0	3	1	1	0	2	0	2	0	1	1	0	0	453.383	120.351	116.637	0	154.911	0	265.788	0	290.72	242.262	1.16657	0.378379	0.740684	0.471086	0.700223	0.943666	-1.02193	0.475435	0.695617	-0.326446	0.807892	0.979883
circBIN1	chr15	29045539	29050353	+	4	ENSSSCT00000017120.2	BIN1	7,8,9,10	chr15:29040789-29045539|chr15:29050353-29056485	0	0	0	0	0	3	1	0	0	0	0	1	0	0	0	0	0	351.213	77.4553	0	0	0	0	242.262	-2.83408	0.242716	0.651868	-1.32668	0.471716	0.804873	0.397207	0.870549	1	-1.11019	0.629979	0.853552
circBIRC2	chr9	36992573	36994874	+	3	ENSSSCT00000023790.1	BIRC2	2,3,4	chr9:36990792-36992573|chr9:36994874-36999898	0	0	1	3	3	4	5	2	10	1	2	1	0	0	151.128	361.054	349.911	468.284	387.276	242.731	1328.94	284.243	581.441	242.262	-2.1624	0.0824681	0.554362	-2.81348	0.0171327	0.333888	0.109748	0.910337	1	0.760826	0.413495	0.729046
circBIRC2_2	chr9	36992573	37001797	+	5	ENSSSCT00000023790.1	BIRC2	2,3,4,5,6	chr9:36990792-36992573|chr9:37001797-37004254	0	1	1	2	5	2	1	1	5	2	0	0	0	317.991	151.128	240.703	583.186	234.142	77.4553	121.365	664.47	568.485	0	0	-1.12375	0.357843	0.733978	-0.747751	0.551569	0.85465	0.883277	0.472396	0.693288	0.507274	0.688819	0.90447
circBIRC2_3	chr9	36992573	37008057	+	7	ENSSSCT00000023790.1	BIRC2	2,3,4,5,6,7,8	chr9:36990792-36992573|chr9:37008057-37009021	0	2	1	4	4	8	2	1	7	0	2	0	0	635.982	151.128	481.405	466.549	936.569	154.911	121.365	930.259	0	581.441	0	-1.33785	0.219011	0.651868	-0.643301	0.568566	0.865619	1.67598	0.150112	0.498604	0.981436	0.417966	0.729046
circBIRC6	chr3	113974244	113977210	-	2	ENSSSCT00000009316.2	BIRC6	50,49	chr3:113972075-113974244|chr3:113977210-113980292	0	1	0	0	0	0	5	0	0	0	0	1	0	317.991	0	0	0	0	387.276	0	0	0	0	242.262	2.60326	0.218941	0.651868	-0.400823	0.870134	1	-2.4312	0.233118	0.554729	0.572877	0.822296	0.984756
circBIRC6_2	chr3	113999358	114020837	-	4	ENSSSCT00000009316.2	BIRC6	46,45,44,43	chr3:113981718-113999358|chr3:114020837-114024566	0	0	0	1	3	2	0	0	0	0	0	0	0	0	0	120.351	349.911	234.142	0	0	0	0	0	0	-3.73414	0.0475395	0.480548	0	1	1	3.73414	0.0618494	0.383942	0	1	1
circBIRC6_3	chr3	114024566	114032423	-	5	ENSSSCT00000009316.2	BIRC6	42,41,40,39,38	chr3:114020837-114024566|chr3:114032423-114039112	0	0	0	1	0	0	2	1	0	0	0	0	0	0	0	120.351	0	0	154.911	121.365	0	0	0	0	-1.62491	0.427079	0.762693	-2.56889	0.276655	0.690504	1.62491	0.453067	0.689204	2.56889	0.29924	0.656925
circBIRC6_4	chr3	114030014	114039242	-	4	ENSSSCT00000009316.2	BIRC6	40,39,38,37	chr3:114027542-114030014|chr3:114039242-114039949	0	3	2	4	2	3	3	0	1	0	0	0	0	953.973	302.256	481.405	233.274	351.213	232.366	0	132.894	0	0	0	0.13727	0.893956	1	1.4345	0.195732	0.641969	4.28885	0.0213566	0.26455	2.99162	0.13056	0.574282
circBIRC6_5	chr3	114064238	114085951	-	12	ENSSSCT00000009316.2	BIRC6	24,23,22,21,20,19,18,17,16,15,14,13	chr3:114060262-114064238|chr3:114085951-114087701	0	0	0	0	0	0	3	0	0	0	0	0	0	0	0	0	0	0	232.366	0	0	0	0	0	0	1	1	-2.39927	0.31381	0.708347	0	1	1	2.39927	0.336125	0.672453
circBIRC6_6	chr3	114091252	114091857	-	2	ENSSSCT00000009316.2	BIRC6	8,7	chr3:114090389-114091252|chr3:114091857-114094752	0	0	2	1	2	5	1	0	0	0	1	0	0	0	302.256	120.351	233.274	585.355	77.4553	0	0	0	290.72	0	-1.09315	0.391991	0.74499	1.58409	0.284328	0.697196	1.59076	0.266339	0.564331	-1.08648	0.518486	0.774081
circBMPR1B	chr8	133864712	133875510	-	3	ENSSSCT00000035574.1	BMPR1B	4,3,2	None|chr8:133875510-133892469	0	0	1	1	1	2	2	1	0	1	1	0	0	0	151.128	120.351	116.637	234.142	154.911	121.365	0	284.243	290.72	0	-0.922235	0.492611	0.806659	-0.389753	0.779207	0.981089	-0.185547	0.877215	1	-0.718029	0.564866	0.807089
circBMPR1B_2	chr8	133985140	134040905	-	2	ENSSSCT00000034827.1	BMPR1B	2,1	chr8:133875510-133985140|None	0	0	0	0	1	0	0	0	3	0	0	0	0	0	0	0	116.637	0	0	0	398.682	0	0	0	-1.6048	0.424939	0.762693	-2.94693	0.225771	0.66379	1.6048	0.451548	0.689204	2.94693	0.24654	0.639137
circBMPR2	chr15	117531247	117533003	+	2	ENSSSCT00000017544.2	BMPR2	2,3	chr15:117426867-117531247|chr15:117533003-117561051	3	1	5	8	11	11	23	4	4	3	4	3	858.949	317.991	755.639	962.81	1283.01	1287.78	1781.47	485.461	531.576	852.728	1162.88	726.785	-0.799838	0.241506	0.651868	-0.555527	0.416615	0.779733	0.372659	0.577662	0.786803	0.128348	0.847247	0.997882
circBMPR2_2	chr15	117585296	117586576	+	1	ENSSSCT00000017544.2	BMPR2	12	chr15:117581717-117585296|chr15:117586576-117588798	0	2	8	5	5	3	10	6	3	3	0	3	0	635.982	1209.02	601.756	583.186	351.213	774.553	728.192	398.682	852.728	0	726.785	0.453694	0.532454	0.837927	0.121245	0.861005	1	-0.0701055	0.930349	1	0.262344	0.733903	0.935367
circBOLL	chr15	112635292	112652020	-	5	ENSSSCT00000017510.2	BOLL	10,9,8,7,6	chr15:112634552-112635292|chr15:112652020-112657163	0	0	0	3	0	0	3	1	0	0	0	0	0	0	0	361.054	0	0	232.366	121.365	0	0	0	0	-2.861	0.21421	0.651868	-2.88486	0.208105	0.655608	2.861	0.236557	0.557553	2.88486	0.230225	0.62394
circBOLL_2	chr15	112635292	112663956	-	9	ENSSSCT00000017510.2	BOLL	10,9,8,7,6,5,4,3,2	chr15:112634552-112635292|chr15:112663956-112667512	0	0	0	1	0	0	3	1	0	1	0	1	0	0	0	120.351	0	0	232.366	121.365	0	284.243	0	242.262	-1.6165	0.372674	0.739279	-2.95445	0.122269	0.58012	-1.75562	0.259901	0.564331	-0.417676	0.767996	0.956077
circBOLL_3	chr15	112641949	112652020	-	4	ENSSSCT00000017510.2	BOLL	9,8,7,6	chr15:112635391-112641949|chr15:112652020-112657163	1	0	1	0	0	0	1	4	0	0	0	1	286.316	0	151.128	0	0	0	77.4553	485.461	0	0	0	242.262	3.13861	0.0675519	0.52478	-0.272013	0.86039	1	-2.4778	0.15101	0.498604	0.932824	0.578933	0.817088
circBOLL_4	chr15	112641949	112663956	-	8	ENSSSCT00000017510.2	BOLL	9,8,7,6,5,4,3,2	chr15:112635391-112641949|chr15:112663956-112667512	1	1	1	0	1	2	10	17	4	1	0	4	286.316	317.991	151.128	0	116.637	234.142	774.553	2063.21	531.576	284.243	0	969.047	0.878912	0.463792	0.78497	-2.17184	0.0223153	0.361006	-1.74742	0.11154	0.451689	1.30333	0.134851	0.57572
circBOLL_5	chr15	112648185	112663956	-	6	ENSSSCT00000017510.2	BOLL	7,6,5,4,3,2	chr15:112642893-112648185|chr15:112663956-112667512	0	0	1	3	1	0	9	6	4	1	0	4	0	0	151.128	361.054	116.637	0	697.097	728.192	531.576	284.243	0	969.047	-0.93875	0.49673	0.809526	-2.87219	0.0129113	0.305423	-1.38122	0.181502	0.508992	0.552218	0.52556	0.774704
circBRAF	chr18	9569858	9588258	+	7	ENSSSCT00000017958.2	BRAF	7,8,9,10,11,12,13	chr18:9563293-9569858|chr18:9588258-9603360	2	0	5	3	5	2	2	3	1	0	1	2	572.633	0	755.639	361.054	583.186	234.142	154.911	364.096	132.894	0	290.72	484.524	0.345903	0.672423	0.934577	1.18241	0.178874	0.629155	0.517858	0.596466	0.802631	-0.318644	0.760312	0.951312
circBRAF_2	chr18	9603360	9608802	+	3	ENSSSCT00000017958.2	BRAF	14,15,16	chr18:9588258-9603360|chr18:9608802-9617425	4	3	3	3	0	2	6	2	2	1	1	0	1145.27	953.973	453.383	361.054	0	234.142	464.732	242.731	265.788	284.243	290.72	0	1.90619	0.0247487	0.429832	1.17428	0.128928	0.586388	0.106959	0.926576	1	0.838876	0.431558	0.729046
circBRCA1	chr12	20075683	20078161	-	3	ENSSSCT00000025436.1	BRCA1	5,4,3	chr12:20073778-20075683|chr12:20078161-20083352	0	0	0	0	3	0	1	0	0	0	0	0	0	0	0	0	349.911	0	77.4553	0	0	0	0	0	-2.83028	0.243924	0.651868	-1.32616	0.47221	0.804873	2.83028	0.265094	0.564331	1.32616	0.498734	0.764058
circBRD4	chr2	61866061	61872040	+	3	ENSSSCT00000027972.1	BRD4	2,3,4	chr2:61828015-61866061|chr2:61872040-61873619	19	3	8	63	77	56	37	17	13	16	9	26	5440.01	953.973	1209.02	7582.13	8981.06	6555.98	2865.84	2063.21	1727.62	4547.88	2616.48	6298.81	-1.65646	0.000630378	0.140868	0.11041	0.828499	1	0.76545	0.0920227	0.427909	-1.00142	0.0364939	0.440027
circBRD4_2	chr2	61866061	61875892	+	6	ENSSSCT00000027972.1	BRD4	2,3,4,5,6,7	chr2:61828015-61866061|chr2:61875892-61882307	0	0	0	0	0	4	0	0	0	0	0	0	0	0	0	0	0	468.284	0	0	0	0	0	0	-3.19731	0.199911	0.649073	0	1	1	3.19731	0.218821	0.541331	0	1	1
circBRD4_3	chr2	61870481	61872040	+	2	ENSSSCT00000027972.1	BRD4	3,4	chr2:61866380-61870481|chr2:61872040-61873619	0	0	2	0	0	3	5	5	5	0	0	0	0	0	302.256	0	0	351.213	387.276	606.827	664.47	0	0	0	0.208063	0.870012	1	-1.83297	0.116204	0.571979	2.839	0.159719	0.503534	4.88004	0.00713364	0.259913
circBTBD7	chr7	121213885	121217710	-	2	ENSSSCT00000002732.2	BTBD7	8,7	chr7:121211260-121213885|chr7:121217710-121219838	0	0	1	1	0	1	1	3	0	0	1	1	0	0	151.128	120.351	0	117.071	77.4553	364.096	0	0	290.72	242.262	-0.12252	0.944078	1	-0.855898	0.569799	0.865619	-1.021	0.478804	0.697204	-0.287624	0.830515	0.988596
circBTBD7_2	chr7	121258975	121260967	-	2	ENSSSCT00000002732.2	BTBD7	2,1	chr7:121232103-121258975|None	8	8	27	21	14	20	32	13	8	3	2	3	2290.53	2543.93	4080.45	2527.38	1632.92	2341.42	2478.57	1577.75	1063.15	852.728	581.441	726.785	0.509198	0.258033	0.65279	0.803546	0.0766027	0.513545	1.56084	0.00872354	0.19892	1.26649	0.0356458	0.440027
circBVES	chr1	80660554	80671102	-	4	ENSSSCT00000004825.2	BVES	7,6,5,4	chr1:80638953-80660554|chr1:80671102-80673951	0	0	3	0	0	0	8	5	0	0	0	1	0	0	453.383	0	0	0	619.642	606.827	0	0	0	242.262	3.40592	0.0509659	0.48914	-1.1011	0.478207	0.805894	-2.47084	0.158644	0.503534	2.03618	0.241171	0.636905
circBVES_2	chr1	80669933	80671102	-	2	ENSSSCT00000004825.2	BVES	5,4	chr1:80662114-80669933|chr1:80671102-80673951	0	0	1	0	0	0	3	1	2	0	0	0	0	0	151.128	0	0	0	232.366	121.365	265.788	0	0	0	2.2466	0.159842	0.622196	-1.32132	0.346447	0.732063	0	1	1	3.56792	0.0684145	0.502561
circBZW1	chr15	115740394	115743423	-	5	ENSSSCT00000017522.2	BZW1	8,7,6,5,4	chr15:115739430-115740394|chr15:115743423-115745983	0	0	1	3	4	0	1	0	1	1	0	0	0	0	151.128	361.054	466.549	0	77.4553	0	132.894	284.243	0	0	-1.72842	0.247526	0.651868	0.00248242	0.991181	1	1.41752	0.347908	0.619789	-0.313389	0.849167	0.99874
circC10orf76	chr14	122832505	122867561	-	6	ENSSSCT00000011564.2	C10orf76	23,22,21,20,19,18	chr14:122775577-122832505|chr14:122867561-122868916	0	1	0	0	0	0	0	2	0	0	0	0	0	317.991	0	0	0	0	0	242.731	0	0	0	0	2.59109	0.208692	0.651837	0.230773	0.928547	1	0	1	1	2.36031	0.332836	0.672453
circC12orf29	chr5	99165945	99168902	-	3	ENSSSCT00000001010.2	C12orf29	5,4,3	chr5:99163605-99165945|chr5:99168902-99173053	0	1	0	7	5	12	7	1	0	1	1	0	0	317.991	0	842.459	583.186	1404.85	542.187	121.365	0	284.243	290.72	0	-3.29148	0.00605897	0.312928	-1.46122	0.269076	0.685027	2.25441	0.036608	0.325503	0.424148	0.71822	0.92382
circC12orf4	chr5	68106960	68128063	+	9	ENSSSCT00000000786.2	C12orf4	2,3,4,5,6,7,8,9,10	chr5:68104350-68106960|chr5:68128063-68132421	0	0	0	0	1	2	0	1	0	0	0	0	0	0	0	0	116.637	234.142	0	121.365	0	0	0	0	-2.83287	0.240189	0.651868	-1.60299	0.429285	0.783793	2.83287	0.261523	0.564331	1.60299	0.455729	0.734227
circC19orf47	chr6	44401006	44402988	-	2	ENSSSCT00000028488.1	C19orf47	5,4	chr6:44399637-44401006|chr6:44402988-44406680	0	0	1	3	1	3	8	4	2	3	0	0	0	0	151.128	361.054	116.637	351.213	619.642	485.461	265.788	852.728	0	0	-1.6772	0.195042	0.649073	-2.41222	0.0450581	0.437012	0.0105529	0.991626	1	0.745571	0.453396	0.734227
circC1orf21	chr9	138073301	138107955	+	2	ENSSSCT00000016955.2	C1orf21	2,3	chr9:137973004-138073301|chr9:138107955-138185228	0	0	2	5	2	4	4	4	1	0	0	0	0	0	302.256	601.756	233.274	468.284	309.821	485.461	132.894	0	0	0	-1.47344	0.167859	0.622417	-1.02519	0.351612	0.735378	4.56471	0.00909617	0.199546	4.11645	0.0230459	0.396347
circC1orf27	chr9	140014052	140018950	+	2	ENSSSCT00000016970.2	C1orf27	12,13	chr9:140013025-140014052|chr9:140018950-140029643	0	0	4	3	3	6	7	0	5	0	2	1	0	0	604.511	361.054	349.911	702.427	542.187	0	664.47	0	581.441	242.262	-0.793355	0.464917	0.78497	-0.589087	0.589008	0.882073	0.753611	0.504709	0.715738	0.549343	0.627535	0.852308
circC1orf27_2	chr9	140018764	140029754	+	2	ENSSSCT00000016970.2	C1orf27	13,14	chr9:140014143-140018764|chr9:140029754-140031084	1	0	1	16	5	6	3	0	0	1	4	0	286.316	0	151.128	1925.62	583.186	702.427	232.366	0	0	284.243	1162.88	0	-2.68339	0.0148024	0.366962	0.553729	0.680084	0.933922	1.1717	0.219833	0.541426	-2.06542	0.0738027	0.510087
circC2CD3	chr9	9231611	9291439	-	4	ENSSSCT00000016187.2	C2CD3	26,25,24,23	chr9:9231139-9231611|chr9:9291439-9291867	0	0	3	2	1	0	0	0	0	0	0	0	0	0	453.383	240.703	116.637	0	0	0	0	0	0	0	0.462385	0.819653	0.988848	3.3135	0.0909824	0.541693	2.85112	0.240032	0.559503	0	1	1
circC2CD3_2	chr9	9303311	9311614	-	3	ENSSSCT00000016187.2	C2CD3	14,13,12	chr9:9301397-9303311|chr9:9311614-9316421	0	0	0	2	0	0	5	1	0	0	0	0	0	0	0	240.703	0	0	387.276	121.365	0	0	0	0	-2.36978	0.271717	0.667487	-3.35253	0.145044	0.603499	2.36978	0.298112	0.582326	3.35253	0.163761	0.601565
circC2CD3_3	chr9	9332252	9333302	-	2	ENSSSCT00000016187.2	C2CD3	5,4	chr9:9327691-9332252|chr9:9333302-9341513	4	0	1	1	1	0	4	2	2	0	0	0	1145.27	0	151.128	120.351	116.637	0	309.821	242.731	265.788	0	0	0	2.12575	0.0939227	0.569987	0.537418	0.631473	0.9038	2.35573	0.246553	0.563686	3.94406	0.0433589	0.454581
circC2orf42	chr3	75742882	75747049	+	2	ENSSSCT00000009124.2	C2orf42	3,4	chr3:75740208-75742882|chr3:75747049-75748521	1	0	1	1	2	1	3	1	1	2	0	0	286.316	0	151.128	120.351	233.274	117.071	232.366	121.365	132.894	568.485	0	0	-0.0558946	0.962888	1	-0.165888	0.885539	1	-0.186109	0.87854	1	-0.0761155	0.950275	1
circC2orf42_2	chr3	75742882	75748626	+	3	ENSSSCT00000009124.2	C2orf42	3,4,5	chr3:75740208-75742882|chr3:75748626-75752216	0	0	0	1	1	0	2	3	0	0	1	0	0	0	0	120.351	116.637	0	154.911	364.096	0	0	290.72	0	-2.35609	0.221866	0.651868	-3.33751	0.0845458	0.529715	-0.178721	0.915186	1	0.802699	0.604944	0.83654
circC2orf42_3	chr3	75742882	75756405	+	6	ENSSSCT00000009124.2	C2orf42	3,4,5,6,7,8	chr3:75740208-75742882|chr3:75756405-75762208	0	0	0	3	5	1	6	10	2	0	0	0	0	0	0	361.054	583.186	117.071	464.732	1213.65	265.788	0	0	0	-4.28575	0.016235	0.368194	-5.11604	0.00255485	0.125375	4.28575	0.0233531	0.278852	5.11604	0.00417185	0.215139
circC2orf42_4	chr3	75746944	75756405	+	5	ENSSSCT00000009124.2	C2orf42	4,5,6,7,8	chr3:75742993-75746944|chr3:75756405-75762208	0	1	0	2	3	0	1	0	0	0	0	0	0	317.991	0	240.703	349.911	0	77.4553	0	0	0	0	0	-1.01173	0.570592	0.865832	1.0975	0.568961	0.865619	3.49722	0.119098	0.46014	1.38798	0.459138	0.734227
circC2orf76	chr15	28526427	28551296	-	5	ENSSSCT00000017118.2	C2orf76	6,5,4,3,2	chr15:28518182-28526427|chr15:28551296-28577944	0	1	0	3	0	0	2	0	0	0	0	0	0	317.991	0	361.054	0	0	154.911	0	0	0	0	0	-0.257382	0.91745	1	0.643776	0.808156	0.993625	2.86297	0.279769	0.568959	1.96181	0.397908	0.722137
circC2orf76_2	chr15	28540272	28551296	-	3	ENSSSCT00000017118.2	C2orf76	4,3,2	chr15:28533765-28540272|chr15:28551296-28577944	0	0	2	3	2	3	3	0	0	0	0	0	0	0	302.256	361.054	233.274	351.213	232.366	0	0	0	0	0	-1.09275	0.385898	0.743273	0.459439	0.734262	0.958595	4.1268	0.0330501	0.315372	2.57461	0.198715	0.608094
circC5orf42	chr16	23596531	23598577	-	3	ENSSSCT00000018340.2	C5orf42	11,10,9	chr16:23594892-23596531|chr16:23598577-23600481	0	0	0	0	6	8	2	0	1	2	0	0	0	0	0	0	699.823	936.569	154.911	0	132.894	568.485	0	0	-4.88618	0.0140635	0.361575	-2.63453	0.182382	0.632206	1.47413	0.313815	0.600036	-0.777522	0.619657	0.845721
circC6orf89	chr7	37462944	37463824	+	2	ENSSSCT00000001748.2	C6orf89	2,3	chr7:37451473-37462944|chr7:37463824-37471723	0	0	0	2	0	0	2	0	0	0	0	0	0	0	0	240.703	0	0	154.911	0	0	0	0	0	-2.37211	0.30631	0.699899	-1.97215	0.359187	0.744503	2.37211	0.329942	0.613013	1.97215	0.384628	0.709467
circCAB39L	chr11	18665769	18676841	+	3	ENSSSCT00000010296.2	CAB39L	3,4,5	chr11:18630310-18665769|chr11:18676841-18689902	0	0	0	1	3	0	3	1	0	0	0	0	0	0	0	120.351	349.911	0	232.366	121.365	0	0	0	0	-3.2028	0.124076	0.602346	-2.91771	0.154035	0.611759	3.2028	0.145301	0.495808	2.91771	0.178284	0.603178
circCACNA2D1	chr9	108308169	108359475	+	3	ENSSSCT00000016777.2	CACNA2D1	4,5,6	chr9:108171796-108308169|chr9:108359475-108396658	0	0	1	1	0	0	9	2	0	0	0	1	0	0	151.128	120.351	0	0	697.097	242.731	0	0	0	242.262	0.565946	0.735936	0.950254	-1.99917	0.215824	0.659311	-0.859342	0.62814	0.827319	1.70577	0.293978	0.65626
circCACNA2D1_2	chr9	108482658	108529065	+	20	ENSSSCT00000016777.2	CACNA2D1	19,20,21,22,23,24,25,26,27,28,29,30,31,32,33,34,35,36,37,38	chr9:108475482-108482658|chr9:108529065-108550890	1	0	0	0	1	0	1	2	7	0	0	0	286.316	0	0	0	116.637	0	77.4553	242.731	930.259	0	0	0	0.810083	0.656739	0.926511	-2.05047	0.211931	0.656555	1.60817	0.414875	0.672142	4.46873	0.0362023	0.440027
circCACNA2D1_3	chr9	108495723	108529065	+	15	ENSSSCT00000016777.2	CACNA2D1	24,25,26,27,28,29,30,31,32,33,34,35,36,37,38	chr9:108495045-108495723|chr9:108529065-108550890	0	0	0	0	0	1	0	7	0	0	0	0	0	0	0	0	0	117.071	0	849.557	0	0	0	0	-1.60655	0.443209	0.769543	-3.97369	0.164639	0.621111	1.60655	0.467704	0.690912	3.97369	0.178207	0.603178
circCACNA2D1_4	chr9	108511447	108524946	+	7	ENSSSCT00000016777.2	CACNA2D1	30,31,32,33,34,35,36	chr9:108509677-108511447|chr9:108524946-108527561	1	0	3	3	6	2	3	0	3	1	1	0	286.316	0	453.383	361.054	699.823	234.142	232.366	0	398.682	284.243	290.72	0	-0.556221	0.563929	0.860165	0.427807	0.675331	0.933428	1.16495	0.289899	0.576018	0.18092	0.878079	1
circCACNA2D1_5	chr9	108522657	108524946	+	4	ENSSSCT00000016777.2	CACNA2D1	33,34,35,36	chr9:108521489-108522657|chr9:108524946-108527561	6	3	9	5	9	11	27	16	4	2	1	3	1717.9	953.973	1360.15	601.756	1049.73	1287.78	2091.29	1941.85	531.576	568.485	290.72	726.785	0.455825	0.466486	0.78497	-0.201122	0.735362	0.958595	0.843857	0.262015	0.564331	1.5008	0.0356325	0.440027
circCACNB2	chr10	49568555	49571722	+	2	ENSSSCT00000012084.2	CACNB2	2,3	chr10:49568439-49568555|chr10:49571722-49576019	0	0	0	0	3	0	0	2	0	0	0	0	0	0	0	0	349.911	0	0	242.731	0	0	0	0	-2.82872	0.355718	0.733491	-2.37637	0.401551	0.770955	2.82872	0.371473	0.637899	2.37637	0.418807	0.729046
circCALCOCO2	chr12	25021890	25025161	+	3	ENSSSCT00000019097.2	CALCOCO2	5,6,7	chr12:25020568-25021890|chr12:25025161-25026656	0	0	2	0	2	0	1	3	0	0	0	0	0	0	302.256	0	233.274	0	77.4553	364.096	0	0	0	0	0.533786	0.76748	0.96178	-0.229877	0.908251	1	2.34599	0.291151	0.576281	3.10965	0.180498	0.603178
circCAMK2D	chr8	117220195	117258527	+	5	ENSSSCT00000009990.2	CAMK2D	14,15,16,17,18	chr8:117211108-117220195|chr8:117258527-117259909	6	5	31	24	29	25	115	74	55	10	24	12	1717.9	1589.96	4684.96	2888.43	3382.48	2926.78	8907.36	8981.03	7309.17	2842.43	6977.29	2907.14	-0.0698967	0.865836	1	-1.52077	8.47466e-05	0.0135272	-0.450389	0.265853	0.564331	1.00049	0.00832733	0.268396
circCAMK2D_2	chr8	117211070	117258527	+	6	ENSSSCT00000009990.2	CAMK2D	13,14,15,16,17,18	chr8:117207859-117211070|chr8:117258527-117259909	2	3	2	3	1	1	7	6	0	0	0	1	572.633	953.973	302.256	361.054	116.637	117.071	542.187	728.192	0	0	0	242.262	1.43809	0.161167	0.622196	0.365023	0.698758	0.943666	1.0003	0.481269	0.699268	2.07336	0.110116	0.56568
circCAMK2D_3	chr8	117178360	117189529	+	2	ENSSSCT00000009990.2	CAMK2D	6,7	chr8:117175027-117178360|chr8:117189529-117196717	0	0	0	2	1	0	4	0	0	0	0	0	0	0	0	240.703	116.637	0	309.821	0	0	0	0	0	-2.85123	0.222191	0.651868	-2.75664	0.229191	0.666435	2.85123	0.244245	0.562686	2.75664	0.251845	0.647009
circCAMSAP2	chr10	27770854	27783841	-	4	ENSSSCT00000030669.1	CAMSAP2	10,9,8,7	chr10:27767781-27770854|chr10:27783841-27792022	0	0	0	0	1	0	0	0	1	0	0	0	0	0	0	0	116.637	0	0	0	132.894	0	0	0	-1.60396	0.443543	0.769543	-1.67573	0.435568	0.783793	1.60396	0.468045	0.690912	1.67573	0.459933	0.734227
circCANX	chr2	80452933	80463317	-	11	ENSSSCT00000015315.2	CANX	12,11,10,9,8,7,6,5,4,3,2	chr2:80451580-80452933|chr2:80463317-80482326	0	1	2	0	2	0	4	0	0	0	0	0	0	317.991	302.256	0	233.274	0	309.821	0	0	0	0	0	1.2488	0.501619	0.811316	0.808849	0.657872	0.92113	2.34599	0.291218	0.576281	2.78594	0.218059	0.616484
circCANX_2	chr2	80454229	80463317	-	10	ENSSSCT00000015315.2	CANX	11,10,9,8,7,6,5,4,3,2	chr2:80453053-80454229|chr2:80463317-80482326	0	0	2	6	1	0	2	0	3	0	1	0	0	0	302.256	722.108	116.637	0	154.911	0	398.682	0	290.72	0	-1.01254	0.516469	0.82634	-0.439537	0.785144	0.98275	1.41658	0.400957	0.666549	0.843576	0.620889	0.845949
circCANX_3	chr2	80461234	80463317	-	4	ENSSSCT00000015315.2	CANX	5,4,3,2	chr2:80460531-80461234|chr2:80463317-80482326	0	0	2	0	6	1	0	0	2	0	0	0	0	0	302.256	0	699.823	117.071	0	0	265.788	0	0	0	-1.05352	0.575342	0.869213	0.472194	0.788552	0.985543	3.93222	0.09941	0.440217	2.4065	0.285104	0.653682
circCAPN3	chr1	143860562	143862926	-	4	ENSSSCT00000005224.2	CAPN3	13,12,11,10	chr1:143855368-143860562|chr1:143862926-143864067	0	0	0	1	2	0	4	5	0	0	1	0	0	0	0	120.351	233.274	0	309.821	606.827	0	0	290.72	0	-2.84141	0.152022	0.622196	-4.0985	0.0372023	0.422718	0.302846	0.854288	0.990182	1.55994	0.321905	0.669693
circCAPN7	chr13	2382114	2393883	+	5	ENSSSCT00000022738.1	CAPN7	2,3,4,5,6	chr13:2379376-2382114|chr13:2393883-2398095	1	0	6	2	0	1	3	0	0	2	0	0	286.316	0	906.767	240.703	0	117.071	232.366	0	0	568.485	0	0	1.73128	0.220347	0.651868	2.0671	0.143591	0.603499	-0.563412	0.720577	0.890259	-0.899229	0.5711	0.811499
circCAPN7_2	chr13	2382114	2406634	+	11	ENSSSCT00000022738.1	CAPN7	2,3,4,5,6,7,8,9,10,11,12	chr13:2379376-2382114|chr13:2406634-2420411	0	0	0	0	3	0	3	0	2	1	0	0	0	0	0	0	349.911	0	232.366	0	265.788	284.243	0	0	-2.83261	0.1824	0.641401	-3.28778	0.127667	0.585422	0.291824	0.876338	1	0.746989	0.688876	0.90447
circCAPN7_3	chr13	2387442	2406634	+	10	ENSSSCT00000022738.1	CAPN7	3,4,5,6,7,8,9,10,11,12	chr13:2382223-2387442|chr13:2406634-2420411	0	0	0	0	1	0	3	4	0	0	0	0	0	0	0	0	116.637	0	232.366	485.461	0	0	0	0	-1.60703	0.393589	0.74499	-3.76409	0.0845454	0.529715	1.60703	0.4241	0.674557	3.76409	0.0996748	0.546593
circCAPN7_4	chr13	2389103	2406634	+	9	ENSSSCT00000022738.1	CAPN7	4,5,6,7,8,9,10,11,12	chr13:2387600-2389103|chr13:2406634-2420411	1	2	0	2	0	0	1	1	3	0	0	0	286.316	635.982	0	240.703	0	0	77.4553	121.365	398.682	0	0	0	1.55865	0.30496	0.699078	0.469087	0.744284	0.961773	2.36411	0.258356	0.564331	3.45368	0.102356	0.550719
circCAPRIN1	chr2	29219246	29219660	-	2	ENSSSCT00000014531.2	CAPRIN1	6,5	chr2:29216402-29219246|chr2:29219660-29224762	0	0	2	0	4	4	3	3	1	0	0	0	0	0	302.256	0	466.549	468.284	232.366	364.096	132.894	0	0	0	-1.09917	0.400011	0.747261	-0.763449	0.564327	0.865619	4.11747	0.0367672	0.325503	3.78175	0.0578149	0.48328
circCAPRIN1_2	chr2	29219246	29225004	-	4	ENSSSCT00000014531.2	CAPRIN1	6,5,4,3	chr2:29216402-29219246|chr2:29225004-29241833	0	1	3	0	2	0	3	0	1	0	1	1	0	317.991	453.383	0	233.274	0	232.366	0	132.894	0	290.72	242.262	1.62325	0.216344	0.651868	0.999374	0.41685	0.779733	-1.02694	0.479111	0.697342	-0.403062	0.770489	0.957967
circCARNMT1	chr1	254981226	254982407	-	2	ENSSSCT00000005806.2	CARNMT1	3,2	chr1:254966622-254981226|chr1:254982407-254991082	0	0	0	0	0	3	1	0	0	0	0	0	0	0	0	0	0	351.213	77.4553	0	0	0	0	0	-2.83406	0.24343	0.651868	-1.32621	0.472157	0.804873	2.83406	0.264581	0.564331	1.32621	0.498686	0.764058
circCASD1	chr9	81468460	81502257	+	4	ENSSSCT00000016700.2	CASD1	2,3,4,5	chr9:81460013-81468460|chr9:81502257-81523214	2	0	0	2	0	0	0	1	0	0	0	0	572.633	0	0	240.703	0	0	0	121.365	0	0	0	0	1.044	0.687101	0.942654	1.80724	0.480102	0.805894	2.3728	0.343472	0.616461	1.60956	0.466028	0.734426
circCASD1_2	chr9	81539753	81544896	+	4	ENSSSCT00000016700.2	CASD1	14,15,16,17	chr9:81537030-81539753|chr9:81544896-81548329	0	0	0	2	5	1	1	0	0	0	0	0	0	0	0	240.703	583.186	117.071	77.4553	0	0	0	0	0	-4.12284	0.0273441	0.446841	-1.43854	0.404042	0.771131	4.12284	0.0369007	0.325503	1.43854	0.43757	0.729046
circCASP10	chr15	116138977	116152953	+	5	ENSSSCT00000025501.1	CASP10	4,5,6,7,8	chr15:116131849-116138977|chr15:116152953-116154399	0	0	0	0	0	0	3	0	0	0	0	0	0	0	0	0	0	0	232.366	0	0	0	0	0	0	1	1	-2.39927	0.31381	0.708347	0	1	1	2.39927	0.336125	0.672453
circCAT	chr2	28869233	28885224	-	8	ENSSSCT00000014528.2	CAT	10,9,8,7,6,5,4,3	chr2:28864104-28869233|chr2:28885224-28886357	0	1	7	1	2	6	1	0	1	0	0	0	0	317.991	1057.89	120.351	233.274	702.427	77.4553	0	132.894	0	0	0	0.525518	0.626749	0.909071	2.59158	0.0364573	0.41851	4.28138	0.0286542	0.300483	2.21531	0.272787	0.651471
circCAT_2	chr2	28883701	28885224	-	2	ENSSSCT00000014528.2	CAT	4,3	chr2:28883113-28883701|chr2:28885224-28886357	0	0	0	0	5	0	1	0	1	0	0	0	0	0	0	0	583.186	0	77.4553	0	132.894	0	0	0	-3.483	0.167568	0.622417	-2.21826	0.318931	0.710809	3.483	0.184646	0.50983	2.21826	0.344029	0.676355
circCBFA2T2	chr17	42006761	42018906	-	4	ENSSSCT00000027119.1	CBFA2T2	6,5,4,3	chr17:42002600-42006761|chr17:42018906-42023480	3	0	3	0	2	1	5	0	7	0	0	1	858.949	0	453.383	0	233.274	117.071	387.276	0	930.259	0	0	242.262	1.76724	0.162069	0.622196	0.0412968	0.970439	1	0.347609	0.828436	0.976412	2.07355	0.154957	0.590383
circCBFA2T2_2	chr17	42008714	42018906	-	3	ENSSSCT00000027119.1	CBFA2T2	5,4,3	chr17:42007015-42008714|chr17:42018906-42023480	2	1	6	3	5	1	6	2	2	0	2	1	572.633	317.991	906.767	361.054	583.186	117.071	464.732	242.731	265.788	0	581.441	242.262	0.850886	0.28038	0.674683	0.905353	0.245529	0.677032	0.362035	0.712985	0.88483	0.307568	0.75172	0.946925
circCBL	chr9	51522098	51524042	+	3	ENSSSCT00000016481.2	CBL	10,11,12	chr9:51515063-51522098|chr9:51524042-51537818	0	1	1	1	3	0	7	0	0	0	0	0	0	317.991	151.128	120.351	349.911	0	542.187	0	0	0	0	0	-0.0316111	0.984555	1	-0.315589	0.846506	1	3.20265	0.152423	0.498604	3.48663	0.117482	0.572872
circCBX1	chr12	24242430	24243253	+	2	ENSSSCT00000019083.2	CBX1	2,3	chr12:24228869-24242430|chr12:24243253-24243940	1	0	2	1	2	3	6	3	0	0	4	0	286.316	0	302.256	120.351	233.274	351.213	464.732	364.096	0	0	1162.88	0	-0.118688	0.926136	1	-0.400473	0.741215	0.960058	-0.622631	0.605726	0.810392	-0.340847	0.773129	0.959824
circCCDC186	chr14	135630657	135631353	-	1	ENSSSCT00000011647.2	CCDC186	2	chr14:135625410-135630657|chr14:135631353-135641480	0	0	0	3	1	0	2	0	0	0	0	0	0	0	0	361.054	116.637	0	154.911	0	0	0	0	0	-3.21807	0.162081	0.622196	-2.0052	0.323299	0.714491	3.21807	0.182037	0.508992	2.0052	0.351608	0.681011
circCCDC58	chr13	147773670	147780722	+	2	ENSSSCT00000030693.1	CCDC58	2,3	chr13:147763691-147773670|chr13:147780722-147780982	1	0	0	5	1	1	7	2	2	0	0	4	286.316	0	0	601.756	116.637	117.071	542.187	242.731	265.788	0	0	969.047	-1.58267	0.265177	0.656675	-1.94391	0.159402	0.612742	-0.298926	0.795065	0.954287	0.0623132	0.956096	1
circCCDC6	chr14	68165376	68175427	-	3	ENSSSCT00000011177.2	CCDC6	7,6,5	chr14:68156111-68165376|chr14:68175427-68177958	0	0	2	1	1	0	3	1	0	0	0	0	0	0	302.256	120.351	116.637	0	232.366	121.365	0	0	0	0	0.626759	0.672805	0.934577	0.0422259	0.973003	1	2.35627	0.256766	0.564331	2.94081	0.156989	0.593541
circCCDC6_2	chr14	68195866	68212247	-	2	ENSSSCT00000011177.2	CCDC6	3,2	chr14:68178062-68195866|chr14:68212247-68273895	0	0	1	0	2	1	4	3	6	1	0	1	0	0	151.128	0	233.274	117.071	309.821	364.096	797.364	284.243	0	242.262	-0.568351	0.691418	0.942654	-2.41239	0.0446372	0.437012	-0.538822	0.672784	0.85748	1.30522	0.22483	0.620781
circCCDC66	chr13	42298386	42335756	+	11	ENSSSCT00000026637.1	CCDC66	6,7,8,9,10,11,12,13,14,15,16	chr13:42298067-42298386|chr13:42335756-42336227	0	0	0	0	2	5	3	5	2	0	0	0	0	0	0	0	233.274	585.355	232.366	606.827	265.788	0	0	0	-3.93733	0.0384487	0.45914	-4.32184	0.0212361	0.359512	3.93733	0.0503566	0.356861	4.32184	0.028915	0.426251
circCCDC69	chr16	78028006	78032631	+	3	ENSSSCT00000026502.1	CCDC69	2,3,4	chr16:78027700-78028006|chr16:78032631-78046528	0	0	1	2	5	1	3	0	0	1	1	0	0	0	151.128	240.703	583.186	117.071	232.366	0	0	284.243	290.72	0	-1.88982	0.182547	0.641401	-0.334668	0.823624	1	0.716491	0.576768	0.786225	-0.838658	0.553042	0.796647
circCCNH	chr2	97529617	97534578	-	3	ENSSSCT00000015451.2	CCNH	5,4,3	chr2:97520354-97529617|chr2:97534578-97536613	0	0	2	3	0	0	1	2	1	0	0	0	0	0	302.256	361.054	0	0	77.4553	242.731	132.894	0	0	0	0.0878548	0.947969	1	-0.178258	0.918918	1	2.85615	0.186757	0.511589	3.12226	0.150024	0.584118
circCCNI	chr8	76896145	76900030	-	4	ENSSSCT00000009844.2	CCNI	6,5,4,3	chr8:76888712-76896145|chr8:76900030-76910848	2	2	14	13	8	3	10	7	4	1	0	1	572.633	635.982	2115.79	1564.57	933.097	351.213	774.553	849.557	531.576	284.243	0	242.262	0.368658	0.57541	0.869213	0.745892	0.265372	0.683349	2.28003	0.0184623	0.244063	1.9028	0.0547568	0.473818
circCCNYL1	chr15	122439222	122461484	-	8	ENSSSCT00000031210.1	CCNYL1	9,8,7,6,5,4,3,2	chr15:122437906-122439222|chr15:122461484-122470833	0	0	0	0	0	0	3	0	0	0	0	0	0	0	0	0	0	0	232.366	0	0	0	0	0	0	1	1	-2.39927	0.31381	0.708347	0	1	1	2.39927	0.336125	0.672453
circCCNYL1_2	chr15	122446654	122461484	-	6	ENSSSCT00000031210.1	CCNYL1	7,6,5,4,3,2	chr15:122442708-122446654|chr15:122461484-122470833	0	0	1	3	0	6	4	0	1	0	0	0	0	0	151.128	361.054	0	702.427	309.821	0	132.894	0	0	0	-2.10477	0.198358	0.649073	-1.01616	0.540264	0.84717	4.28773	0.0438542	0.337929	3.19911	0.133163	0.574388
circCCNYL1_3	chr15	122453531	122461484	-	3	ENSSSCT00000031210.1	CCNYL1	4,3,2	chr15:122449908-122453531|chr15:122461484-122470833	0	2	0	2	2	2	4	0	0	0	3	0	0	635.982	0	240.703	233.274	234.142	309.821	0	0	0	872.161	0	-0.351224	0.815771	0.986555	0.551423	0.737595	0.959202	-0.237714	0.87401	1	-1.14036	0.454858	0.734227
circCCNYL1_4	chr15	122459591	122461484	-	2	ENSSSCT00000031210.1	CCNYL1	3,2	chr15:122453632-122459591|chr15:122461484-122470833	2	1	0	3	0	2	0	0	0	0	0	2	572.633	317.991	0	361.054	0	234.142	0	0	0	0	0	484.524	0.429195	0.789589	0.972337	3.93356	0.0257841	0.372536	0.189779	0.909493	1	-3.31458	0.0561562	0.473818
circCCSER2	chr14	92407604	92416252	+	2	ENSSSCT00000011332.2	CCSER2	4,5	chr14:92384221-92407604|chr14:92416252-92425151	0	0	0	0	3	0	3	2	0	1	0	1	0	0	0	0	349.911	0	232.366	242.731	0	284.243	0	242.262	-2.83431	0.159124	0.622196	-3.26033	0.105483	0.561694	-0.533603	0.734691	0.901091	-0.107579	0.945187	1
circCCSER2_3	chr14	92407604	92425347	+	3	ENSSSCT00000011332.2	CCSER2	4,5,6	chr14:92384221-92407604|chr14:92425347-92495904	0	0	1	0	1	1	4	0	2	0	0	0	0	0	151.128	0	116.637	117.071	309.821	0	265.788	0	0	0	-0.134732	0.940514	1	-1.291	0.395091	0.767598	2.35033	0.253583	0.564331	3.5066	0.0858343	0.528409
circCCT3	chr4	102444967	102447488	+	2	ENSSSCT00000007106.2	CCT3	9,10	chr4:102442646-102444967|chr4:102447488-102449014	0	2	5	4	3	8	6	5	1	0	0	3	0	635.982	755.639	481.405	349.911	936.569	464.732	606.827	132.894	0	0	726.785	-0.223212	0.793889	0.974382	0.279563	0.746938	0.964088	1.10042	0.264567	0.564331	0.597644	0.555792	0.798953
circCCT3_2	chr4	102444967	102449406	+	4	ENSSSCT00000007106.2	CCT3	9,10,11,12	chr4:102442646-102444967|chr4:102449406-102450726	0	3	2	4	4	0	6	2	2	0	0	1	0	953.973	302.256	481.405	466.549	0	464.732	242.731	265.788	0	0	242.262	0.297905	0.773569	0.966025	0.215422	0.833612	1	1.62886	0.230143	0.554513	1.71135	0.200173	0.608094
circCCT3_3	chr4	102444967	102450907	+	5	ENSSSCT00000007106.2	CCT3	9,10,11,12,13	chr4:102442646-102444967|chr4:102450907-102451826	1	1	4	2	3	6	2	1	0	0	1	0	286.316	317.991	604.511	240.703	349.911	702.427	154.911	121.365	0	0	290.72	0	0.0233863	0.976626	1	1.91355	0.0558177	0.460113	2.03948	0.0914561	0.427861	0.149316	0.914762	1
circCD44	chr2	28170603	28177404	-	3	ENSSSCT00000033911.1	CD44	11,10,9	chr2:28157372-28170603|chr2:28177404-28180628	0	0	1	0	0	0	2	5	3	0	0	0	0	0	151.128	0	0	0	154.911	606.827	398.682	0	0	0	2.20899	0.172691	0.630278	-2.16668	0.150746	0.609279	0	1	1	4.37567	0.0302746	0.433247
circCDC14A	chr4	129286787	129302281	-	3	ENSSSCT00000007517.2	CDC14A	8,7,6	chr4:129268187-129286787|chr4:129302281-129315284	0	0	0	0	0	4	0	0	2	0	0	1	0	0	0	0	0	468.284	0	0	265.788	0	0	242.262	-3.19713	0.213627	0.651868	-2.44631	0.304233	0.706225	0.763764	0.763862	0.925916	0.0129434	0.999325	1
circCDC14A_2	chr4	129286787	129336726	-	6	ENSSSCT00000007517.2	CDC14A	8,7,6,5,4,3	chr4:129268187-129286787|chr4:129336726-129481286	2	0	2	4	3	0	2	0	2	0	0	0	572.633	0	302.256	481.405	349.911	0	154.911	0	265.788	0	0	0	0.104698	0.929018	1	1.00298	0.417512	0.780536	3.94961	0.0461157	0.345713	3.05133	0.133168	0.574388
circCDC14A_3	chr4	129295357	129336726	-	5	ENSSSCT00000007517.2	CDC14A	7,6,5,4,3	chr4:129286926-129295357|chr4:129336726-129481286	0	1	0	8	1	1	0	0	1	0	0	0	0	317.991	0	962.81	116.637	117.071	0	0	132.894	0	0	0	-1.98521	0.235736	0.651868	0.868245	0.630586	0.903734	4.4462	0.0395555	0.33183	1.59274	0.424121	0.729046
circCDC14A_4	chr4	129315284	129336726	-	3	ENSSSCT00000007517.2	CDC14A	5,4,3	chr4:129302281-129315284|chr4:129336726-129481286	1	0	3	2	2	0	0	1	1	0	0	0	286.316	0	453.383	240.703	233.274	0	0	121.365	132.894	0	0	0	0.762895	0.517813	0.82699	1.68298	0.181471	0.632206	3.20801	0.110395	0.451689	2.28793	0.258223	0.647009
circCDC26	chr1	284655395	284656522	-	2	ENSSSCT00000024664.1	CDC26	3,2	chr1:284649393-284655395|chr1:284656522-284659700	0	0	0	0	1	0	0	0	1	0	0	0	0	0	0	0	116.637	0	0	0	132.894	0	0	0	-1.60396	0.443543	0.769543	-1.67573	0.435568	0.783793	1.60396	0.468045	0.690912	1.67573	0.459933	0.734227
circCDC27	chr12	16845380	16852434	+	3	ENSSSCT00000018844.2	CDC27	3,4,5	chr12:16845037-16845380|chr12:16852434-16861241	0	0	3	0	2	0	3	1	1	0	0	0	0	0	453.383	0	233.274	0	232.366	121.365	132.894	0	0	0	1.09519	0.464132	0.78497	0.165406	0.902773	1	2.34843	0.262683	0.564331	3.27821	0.122003	0.572872
circCDC27_2	chr12	16845380	16868014	+	8	ENSSSCT00000018844.2	CDC27	3,4,5,6,7,8,9,10	chr12:16845037-16845380|chr12:16868014-16876106	1	2	0	0	1	1	3	1	1	0	1	0	286.316	635.982	0	0	116.637	117.071	232.366	121.365	132.894	0	290.72	0	1.46378	0.257493	0.65279	0.513197	0.664822	0.926604	-0.173844	0.911822	1	0.776736	0.58276	0.820416
circCDC27_3	chr12	16861241	16868014	+	5	ENSSSCT00000018844.2	CDC27	6,7,8,9,10	chr12:16852434-16861241|chr12:16868014-16876106	0	0	0	0	2	0	4	1	1	0	0	1	0	0	0	0	233.274	0	309.821	121.365	132.894	0	0	242.262	-2.34999	0.2192	0.651868	-3.49893	0.0649477	0.477423	-0.140622	0.929385	1	1.00832	0.501061	0.765173
circCDC42	chr6	74096529	74099676	+	2	ENSSSCT00000003911.2	CDC42	2,3	chr6:74057281-74096529|chr6:74099676-74110043	1	0	0	2	8	1	2	0	0	0	0	0	286.316	0	0	240.703	933.097	117.071	154.911	0	0	0	0	0	-2.15226	0.16609	0.622196	0.319372	0.863559	1	4.55642	0.0266773	0.293561	2.08479	0.301245	0.657405
circCDC42_2	chr6	74096529	74110479	+	4	ENSSSCT00000003911.2	CDC42	2,3,4,5	chr6:74057281-74096529|chr6:74110479-74113824	1	0	2	4	7	1	3	1	1	0	0	0	286.316	0	302.256	481.405	816.46	117.071	232.366	121.365	132.894	0	0	0	-1.04451	0.320255	0.704982	0.333716	0.770218	0.97528	4.68209	0.00893434	0.199033	3.30387	0.0901344	0.533236
circCDC42BPA	chr10	16978305	17000982	-	3	ENSSSCT00000011884.2	CDC42BPA	21,20,19	chr10:16968117-16978305|chr10:17000982-17004620	1	0	1	2	1	2	0	1	0	1	0	0	286.316	0	151.128	240.703	116.637	234.142	0	121.365	0	284.243	0	0	-0.347174	0.76235	0.959133	1.63927	0.233887	0.669504	0.977989	0.464771	0.690317	-1.00846	0.521422	0.774081
circCDC42BPA_2	chr10	17067379	17073695	-	3	ENSSSCT00000011884.2	CDC42BPA	8,7,6	chr10:17056412-17067379|chr10:17073695-17075429	0	0	0	2	1	0	0	1	0	0	0	0	0	0	0	240.703	116.637	0	0	121.365	0	0	0	0	-2.85158	0.237743	0.651868	-1.60285	0.429071	0.783793	2.85158	0.258983	0.564331	1.60285	0.455544	0.734227
circCDC42BPA_3	chr10	17067379	17075630	-	4	ENSSSCT00000011884.2	CDC42BPA	8,7,6,5	chr10:17056412-17067379|chr10:17075630-17127704	0	0	3	3	3	1	1	0	0	0	0	0	0	0	453.383	361.054	349.911	117.071	77.4553	0	0	0	0	0	-0.433826	0.726746	0.949643	2.07042	0.14438	0.603499	3.94653	0.0456699	0.345713	1.44228	0.436205	0.729046
circCDC42BPB	chr7	128851815	128853715	-	3	ENSSSCT00000002802.2	CDC42BPB	15,14,13	chr7:128851189-128851815|chr7:128853715-128856080	0	1	5	2	3	2	6	2	4	1	1	0	0	317.991	755.639	240.703	349.911	234.142	464.732	242.731	531.576	284.243	290.72	0	0.617591	0.471142	0.78969	0.0532759	0.944914	1	0.554141	0.612673	0.816277	1.11846	0.2731	0.651471
circCDK13	chr18	59616407	59617392	-	2	ENSSSCT00000018255.2	CDK13	10,9	chr18:59609942-59616407|chr18:59617392-59628323	0	0	1	0	4	2	3	2	11	0	0	1	0	0	151.128	0	466.549	234.142	232.366	242.731	1461.83	0	0	242.262	-1.5096	0.314129	0.704078	-2.85993	0.044423	0.437012	1.24077	0.413543	0.671472	2.5911	0.0707315	0.508781
circCDK13_2	chr18	59685145	59688893	-	3	ENSSSCT00000018255.2	CDK13	4,3,2	chr18:59641061-59685145|chr18:59688893-59695385	1	4	0	0	0	0	3	2	2	0	1	0	286.316	1271.96	0	0	0	0	232.366	242.731	265.788	0	290.72	0	4.66867	0.00469308	0.31183	0.875236	0.495881	0.812411	-2.53681	0.140049	0.489928	1.25663	0.42046	0.729046
circCDK5RAP1	chr17	41836736	41842344	-	3	ENSSSCT00000007949.2	CDK5RAP1	12,11,10	chr17:41831590-41836736|chr17:41842344-41843423	0	2	4	6	3	9	3	4	4	0	1	3	0	635.982	604.511	722.108	349.911	1053.64	232.366	485.461	531.576	0	290.72	726.785	-0.659267	0.402253	0.748254	0.147464	0.857803	1	0.951985	0.265035	0.564331	0.145254	0.874946	1
circCDKAL1	chr7	16831953	16923676	+	3	ENSSSCT00000001175.2	CDKAL1	3,4,5	chr7:16820846-16831953|chr7:16923676-16992241	1	0	0	0	0	2	2	0	0	2	0	0	286.316	0	0	0	0	234.142	154.911	0	0	568.485	0	0	0.141971	0.953171	1	0.495551	0.828242	1	-1.08097	0.613239	0.816335	-1.43455	0.500467	0.765002
circCEACAM16	chr6	47125472	47125799	+	1	ENSSSCT00000034675.1	CEACAM16	5	chr6:47123374-47125472|chr6:47125799-47127196	1	3	4	1	2	6	3	4	1	1	2	0	286.316	953.973	604.511	120.351	233.274	702.427	232.366	485.461	132.894	284.243	581.441	0	0.74905	0.388952	0.74499	1.05776	0.230551	0.666435	0.34381	0.739137	0.903569	0.0350972	0.973005	1
circCENPK	chr16	47329781	47330528	-	3	ENSSSCT00000018454.2	CENPK	8,7,6	chr16:47323675-47329781|chr16:47330528-47340676	0	0	0	1	0	1	0	0	0	0	0	1	0	0	0	120.351	0	117.071	0	0	0	0	0	242.262	-2.35979	0.310401	0.703409	0	1	1	-0.0749075	0.973258	1	-2.4347	0.210894	0.611265
circCENPK_2	chr16	47340676	47349817	-	4	ENSSSCT00000018454.2	CENPK	5,4,3,2	chr16:47330528-47340676|chr16:47349817-47359064	0	0	0	0	1	0	3	0	2	0	0	0	0	0	0	0	116.637	0	232.366	0	265.788	0	0	0	-1.60665	0.397712	0.746852	-3.28667	0.13467	0.595533	1.60665	0.427684	0.674643	3.28667	0.154475	0.590383
circCEP135	chr8	58262344	58263173	-	3	ENSSSCT00000031478.1	CEP135	17,16,15	chr8:58260068-58262344|chr8:58263173-58268011	2	0	5	0	2	2	2	2	1	0	0	1	572.633	0	755.639	0	233.274	234.142	154.911	242.731	132.894	0	0	242.262	1.55017	0.118958	0.599738	1.40644	0.145122	0.603499	0.699071	0.622575	0.822574	0.842801	0.54409	0.787899
circCEP162	chr1	59726630	59744379	-	7	ENSSSCT00000004742.2	CEP162	13,12,11,10,9,8,7	chr1:59718542-59726630|chr1:59744379-59750077	0	2	1	3	0	5	3	0	5	0	0	0	0	635.982	151.128	361.054	0	585.355	232.366	0	664.47	0	0	0	-0.347728	0.798149	0.976065	-0.24749	0.8558	1	4.128	0.046584	0.345713	4.02776	0.0525626	0.473818
circCEP162_2	chr1	59728050	59744379	-	6	ENSSSCT00000004742.2	CEP162	12,11,10,9,8,7	chr1:59726892-59728050|chr1:59744379-59750077	1	0	3	1	2	1	3	0	0	0	0	0	286.316	0	453.383	120.351	233.274	117.071	232.366	0	0	0	0	0	0.759102	0.529488	0.835547	1.3928	0.263622	0.68289	3.2044	0.113332	0.453329	2.57071	0.200279	0.608094
circCEP162_3	chr1	59739761	59744379	-	3	ENSSSCT00000004742.2	CEP162	9,8,7	chr1:59733229-59739761|chr1:59744379-59750077	2	0	1	3	0	5	4	0	1	1	1	0	572.633	0	151.128	361.054	0	585.355	309.821	0	132.894	284.243	290.72	0	-0.400621	0.746871	0.953584	0.499813	0.701711	0.943666	0.718818	0.58644	0.795205	-0.181616	0.898739	1
circCEP192	chr6	89974807	89975632	-	2	ENSSSCT00000004070.2	CEP192	8,7	chr6:89970988-89974807|chr6:89975632-89981637	0	0	0	0	0	0	0	5	4	0	0	0	0	0	0	0	0	0	0	606.827	531.576	0	0	0	0	1	1	-4.3624	0.079193	0.518525	0	1	1	4.3624	0.0901983	0.533236
circCEP295	chr9	29699976	29705606	-	4	ENSSSCT00000016304.2	CEP295	51,50,49,48	chr9:29696783-29699976|chr9:29705606-29707066	2	0	3	4	5	2	2	1	4	0	0	0	572.633	0	453.383	481.405	583.186	234.142	154.911	121.365	531.576	0	0	0	-0.222085	0.807228	0.981603	0.509934	0.591518	0.883874	4.56259	0.00927672	0.200518	3.83057	0.0396391	0.450599
circCEP63	chr13	83142278	83179748	+	5	ENSSSCT00000012746.2	CEP63	1,2,3,4,5	None|chr13:83179748-83200605	7	5	15	26	27	26	41	41	40	5	2	6	2004.21	1589.96	2266.92	3129.13	3149.2	3043.85	3175.67	4975.98	5315.76	1421.21	581.441	1453.57	-0.621698	0.118981	0.599738	-1.12445	0.00335316	0.147892	1.39541	0.00255232	0.120619	1.89816	1.81993e-05	0.00610041
circCEP63_2	chr13	83142278	83172376	+	4	ENSSSCT00000012746.2	CEP63	1,2,3,4	None|chr13:83172376-83179634	0	0	1	0	2	2	3	0	2	0	0	1	0	0	151.128	0	233.274	234.142	232.366	0	265.788	0	0	242.262	-0.96578	0.518558	0.82699	-1.06934	0.466077	0.804873	0.706968	0.640966	0.835025	0.810525	0.585821	0.821276
circCEP63_3	chr13	83142278	83143459	+	2	ENSSSCT00000012746.2	CEP63	1,2	None|chr13:83143459-83171323	0	0	0	0	1	0	5	0	1	0	0	0	0	0	0	0	116.637	0	387.276	0	132.894	0	0	0	-1.60602	0.405493	0.750947	-3.37512	0.13991	0.599936	1.60602	0.434469	0.67863	3.37512	0.158508	0.596346
circCEP63_4	chr13	83142278	83202617	+	8	ENSSSCT00000012746.2	CEP63	1,2,3,4,5,6,7,8	None|chr13:83202617-83221437	0	1	0	0	2	4	0	0	2	0	0	0	0	317.991	0	0	233.274	468.284	0	0	265.788	0	0	0	-1.21647	0.524	0.832625	0.110639	0.957925	1	3.72808	0.110937	0.451689	2.40097	0.281812	0.651471
circCEP70	chr13	86952847	86985258	-	10	ENSSSCT00000023265.1	CEP70	17,16,15,14,13,12,11,10,9,8	chr13:86949646-86952847|chr13:86985258-86990767	0	0	4	0	0	0	2	0	0	0	2	0	0	0	604.511	0	0	0	154.911	0	0	0	581.441	0	3.65037	0.0893991	0.562327	1.66855	0.448355	0.792244	-3.45269	0.108402	0.451689	-1.47088	0.517428	0.774081
circCH242-58J12.2	chr1	126926295	126928380	-	2	ENSSSCT00000005081.2	CH242-58J12.2	14,13	chr1:126865421-126926295|chr1:126928380-126936875	0	0	2	1	1	1	4	2	1	0	0	0	0	0	302.256	120.351	116.637	117.071	309.821	242.731	132.894	0	0	0	0.272776	0.819553	0.988848	-0.647951	0.549801	0.85321	2.84208	0.146344	0.495833	3.76281	0.0391738	0.450599
circCH242-58J12.2_2	chr1	126926295	126936954	-	3	ENSSSCT00000005081.2	CH242-58J12.2	14,13,12	chr1:126865421-126926295|chr1:126936954-126947680	2	2	3	5	1	0	3	1	0	0	0	0	572.633	635.982	453.383	601.756	116.637	0	232.366	121.365	0	0	0	0	1.13123	0.324912	0.708887	1.92229	0.106453	0.561694	3.74861	0.062222	0.383942	2.95755	0.145309	0.578381
circCH242-58J12.2_3	chr1	126947680	126950090	-	4	ENSSSCT00000005081.2	CH242-58J12.2	11,10,9,8	chr1:126936954-126947680|chr1:126950090-127003938	1	0	1	3	1	1	2	0	0	0	0	2	286.316	0	151.128	361.054	116.637	117.071	154.911	0	0	0	0	484.524	-0.35613	0.784896	0.970122	1.01671	0.473555	0.804948	0.153645	0.908342	1	-1.21919	0.392553	0.719037
circCH242-58J12.2_4	chr1	127113151	127147715	-	2	ENSSSCT00000005081.2	CH242-58J12.2	4,3	chr1:127034721-127113151|chr1:127147715-127286294	0	0	2	1	1	0	3	1	0	0	0	1	0	0	302.256	120.351	116.637	0	232.366	121.365	0	0	0	242.262	0.66373	0.637881	0.915503	0.0599217	0.961746	1	-0.135863	0.93101	1	0.467945	0.757698	0.949195
circCHD1	chr2	108987944	108989283	-	4	ENSSSCT00000032432.1	CHD1	33,32,31,30	chr2:108976608-108987944|chr2:108989283-108990312	1	0	4	0	2	6	2	7	3	1	0	0	286.316	0	604.511	0	233.274	702.427	154.911	849.557	398.682	284.243	0	0	0.106596	0.922832	1	-0.407675	0.71828	0.950148	1.59133	0.272904	0.564331	2.1056	0.136895	0.576499
circCHD1_2	chr2	108992873	109021158	-	19	ENSSSCT00000032432.1	CHD1	26,25,24,23,22,21,20,19,18,17,16,15,14,13,12,11,10,9,8	chr2:108992071-108992873|chr2:109021158-109022805	2	0	0	0	0	2	0	1	0	0	0	0	572.633	0	0	0	0	234.142	0	121.365	0	0	0	0	1.06808	0.675141	0.934767	1.80671	0.473174	0.804873	2.34711	0.343326	0.616461	1.60849	0.464103	0.734227
circCHD1_3	chr2	108995244	109021158	-	17	ENSSSCT00000032432.1	CHD1	24,23,22,21,20,19,18,17,16,15,14,13,12,11,10,9,8	chr2:108993734-108995244|chr2:109021158-109022805	0	0	0	0	2	3	1	2	2	0	0	0	0	0	0	0	233.274	351.213	77.4553	242.731	265.788	0	0	0	-3.48965	0.0699812	0.52478	-3.42662	0.0754835	0.509096	3.48965	0.0877821	0.424597	3.42662	0.0941916	0.537871
circCHD1_4	chr2	109011723	109012889	-	2	ENSSSCT00000032432.1	CHD1	17,16	chr2:109009242-109011723|chr2:109012889-109014593	0	0	0	0	1	0	2	0	0	0	0	0	0	0	0	0	116.637	0	154.911	0	0	0	0	0	-1.60415	0.438949	0.766305	-1.96258	0.372477	0.755908	1.60415	0.463957	0.690317	1.96258	0.396862	0.720629
circCHD2	chr7	91890125	91900141	-	4	ENSSSCT00000002524.2	CHD2	37,36,35,34	chr7:91884525-91890125|chr7:91900141-91902727	1	0	1	0	0	0	2	2	3	0	0	0	286.316	0	151.128	0	0	0	154.911	242.731	398.682	0	0	0	3.14586	0.0497862	0.486515	-0.696968	0.57379	0.869111	0	1	1	3.84283	0.0470275	0.462276
circCHD2_10	chr7	91959136	91982115	-	10	ENSSSCT00000002524.2	CHD2	12,11,10,9,8,7,6,5,4,3	chr7:91956101-91959136|chr7:91982115-92001277	0	0	1	4	2	1	1	1	0	0	0	0	0	0	151.128	481.405	233.274	117.071	77.4553	121.365	0	0	0	0	-1.68868	0.203735	0.649495	0.0537681	0.967677	1	3.94862	0.0365154	0.325503	2.20618	0.265233	0.649098
circCHD2_11	chr7	91964456	91966849	-	2	ENSSSCT00000002524.2	CHD2	8,7	chr7:91962447-91964456|chr7:91966849-91969533	0	0	1	2	1	2	5	2	1	0	0	0	0	0	151.128	240.703	116.637	234.142	387.276	242.731	132.894	0	0	0	-1.21161	0.350319	0.730496	-1.64446	0.177708	0.627269	3.49682	0.0634846	0.383942	3.92967	0.0290235	0.426251
circCHD2_12	chr7	91964456	91969641	-	3	ENSSSCT00000002524.2	CHD2	8,7,6	chr7:91962447-91964456|chr7:91969641-91976024	0	0	2	0	2	8	2	1	4	0	0	1	0	0	302.256	0	233.274	936.569	154.911	121.365	531.576	0	0	242.262	-1.43281	0.299666	0.693223	-0.882607	0.533053	0.841131	1.93706	0.203454	0.536147	1.38686	0.373012	0.699863
circCHD2_13	chr7	91966708	91969641	-	2	ENSSSCT00000002524.2	CHD2	7,6	chr7:91964590-91966708|chr7:91969641-91976024	2	0	1	0	1	0	3	4	0	0	0	0	572.633	0	151.128	0	116.637	0	232.366	485.461	0	0	0	0	2.12357	0.165607	0.622196	-0.0365889	0.976717	1	1.609	0.409423	0.670438	3.76916	0.0665105	0.500822
circCHD2_14	chr7	91976024	91982115	-	3	ENSSSCT00000002524.2	CHD2	5,4,3	chr7:91969641-91976024|chr7:91982115-92001277	1	2	8	11	12	8	13	16	5	3	2	7	286.316	635.982	1209.02	1323.86	1399.65	936.569	1006.92	1941.85	664.47	852.728	581.441	1695.83	-0.616636	0.33916	0.721818	-0.592826	0.355909	0.741458	0.187367	0.767703	0.928333	0.163556	0.795712	0.972894
circCHD2_2	chr7	91917855	91919110	-	2	ENSSSCT00000002524.2	CHD2	26,25	chr7:91912965-91917855|chr7:91919110-91922371	2	0	5	7	5	0	15	6	3	1	2	0	572.633	0	755.639	842.459	583.186	0	1161.83	728.192	398.682	284.243	581.441	0	0.0522355	0.952872	1	-0.651471	0.459533	0.799674	0.743519	0.48172	0.699372	1.44723	0.150484	0.584118
circCHD2_3	chr7	91917855	91950519	-	12	ENSSSCT00000002524.2	CHD2	26,25,24,23,22,21,20,19,18,17,16,15	chr7:91912965-91917855|chr7:91950519-91952611	0	0	1	1	1	3	3	0	0	0	0	0	0	0	151.128	120.351	116.637	351.213	232.366	0	0	0	0	0	-1.28445	0.410691	0.753072	-0.329146	0.834573	1	3.49394	0.0917433	0.427909	2.53863	0.214356	0.611265
circCHD2_4	chr7	91925253	91950519	-	8	ENSSSCT00000002524.2	CHD2	22,21,20,19,18,17,16,15	chr7:91923135-91925253|chr7:91950519-91952611	0	0	1	2	4	0	0	0	0	0	0	0	0	0	151.128	240.703	466.549	0	0	0	0	0	0	0	-1.61921	0.417659	0.76004	2.11743	0.200396	0.644091	3.73664	0.117697	0.458743	0	1	1
circCHD2_5	chr7	91938949	91982115	-	15	ENSSSCT00000002524.2	CHD2	17,16,15,14,13,12,11,10,9,8,7,6,5,4,3	chr7:91933120-91938949|chr7:91982115-92001277	2	1	8	7	5	6	1	2	1	0	1	0	572.633	317.991	1209.02	842.459	583.186	702.427	77.4553	242.731	132.894	0	290.72	0	0.158058	0.808543	0.981614	2.3396	0.0043365	0.173047	2.73095	0.0118126	0.218761	0.549408	0.687541	0.90372
circCHD2_6	chr7	91949363	91950519	-	2	ENSSSCT00000002524.2	CHD2	16,15	chr7:91939138-91949363|chr7:91950519-91952611	0	0	0	1	1	1	4	2	1	0	0	4	0	0	0	120.351	116.637	117.071	309.821	242.731	132.894	0	0	969.047	-2.84214	0.13433	0.602346	-3.73655	0.0419611	0.437012	-1.41375	0.248948	0.564331	-0.519329	0.646616	0.869068
circCHD2_7	chr7	91949363	91982115	-	14	ENSSSCT00000002524.2	CHD2	16,15,14,13,12,11,10,9,8,7,6,5,4,3	chr7:91939138-91949363|chr7:91982115-92001277	2	0	4	10	1	3	1	0	5	0	0	0	572.633	0	604.511	1203.51	116.637	351.213	77.4553	0	664.47	0	0	0	-0.399989	0.742218	0.953165	0.784369	0.531491	0.840503	4.90985	0.0137968	0.22716	3.72549	0.0722971	0.509694
circCHD2_8	chr7	91952611	91982115	-	12	ENSSSCT00000002524.2	CHD2	14,13,12,11,10,9,8,7,6,5,4,3	chr7:91950519-91952611|chr7:91982115-92001277	2	0	1	0	0	1	0	0	1	0	0	0	572.633	0	151.128	0	0	117.071	0	0	132.894	0	0	0	2.13507	0.212392	0.651837	2.14387	0.205474	0.652755	1.60906	0.41869	0.672927	1.60026	0.425283	0.729046
circCHD2_9	chr7	91959136	91962447	-	4	ENSSSCT00000002524.2	CHD2	12,11,10,9	chr7:91956101-91959136|chr7:91962447-91964456	0	0	0	0	3	1	0	2	0	0	0	0	0	0	0	0	349.911	117.071	0	242.731	0	0	0	0	-3.19482	0.175655	0.633879	-2.35086	0.285138	0.69783	3.19482	0.195425	0.524322	2.35086	0.310876	0.665062
circCHD7	chr4	79089336	79101679	-	4	ENSSSCT00000006828.1	CHD7	6,5,4,3	chr4:79081419-79089336|chr4:79101679-79115487	3	1	9	13	18	14	19	9	9	0	0	0	858.949	317.991	1360.15	1564.57	2099.47	1639	1471.65	1092.29	1196.05	0	0	0	-0.880992	0.0900672	0.562327	-0.413036	0.441348	0.787184	6.54689	1.95415e-07	8.18789e-05	6.07894	5.56752e-06	0.00207359
circCHD7_2	chr4	79089336	79096209	-	3	ENSSSCT00000006828.1	CHD7	6,5,4	chr4:79081419-79089336|chr4:79096209-79101537	4	1	7	4	7	3	17	11	4	0	2	2	1145.27	317.991	1057.89	481.405	816.46	351.213	1316.74	1335.02	531.576	0	581.441	484.524	0.668853	0.320631	0.70522	-0.288918	0.63711	0.907605	0.586736	0.487528	0.703463	1.54451	0.0435324	0.454581
circCHD7_3	chr4	79034572	79035983	-	2	ENSSSCT00000006828.1	CHD7	36,35	chr4:79034238-79034572|chr4:79035983-79039492	0	0	3	2	7	4	8	8	2	0	2	0	0	0	453.383	240.703	816.46	468.284	619.642	970.923	265.788	0	581.441	0	-1.21308	0.232469	0.651868	-1.49317	0.131591	0.590486	1.39017	0.206412	0.539698	1.67025	0.119512	0.572872
circCHD7_4	chr4	79094979	79101679	-	3	ENSSSCT00000006828.1	CHD7	5,4,3	chr4:79089392-79094979|chr4:79101679-79115487	2	1	4	6	10	12	11	10	3	0	1	0	572.633	317.991	604.511	722.108	1166.37	1404.85	852.008	1213.65	398.682	0	290.72	0	-1.04636	0.118282	0.599738	-0.650583	0.34365	0.732063	3.3519	0.000854405	0.0650901	2.95612	0.00459223	0.22637
circCHD8	chr7	83110903	83113193	+	3	ENSSSCT00000002379.2	CHD8	26,27,28	chr7:83110322-83110903|chr7:83113193-83113832	1	0	6	4	5	6	14	7	7	4	1	4	286.316	0	906.767	481.405	583.186	702.427	1084.37	849.557	930.259	1136.97	290.72	969.047	-0.208398	0.769915	0.963328	-0.904081	0.164828	0.621111	-0.444648	0.508975	0.719678	0.251035	0.68537	0.90305
circCHORDC1	chr9	26053627	26060698	+	5	ENSSSCT00000016291.2	CHORDC1	6,7,8,9,10	chr9:26051802-26053627|chr9:26060698-26060752	0	0	1	0	3	4	0	0	0	0	0	0	0	0	151.128	0	349.911	468.284	0	0	0	0	0	0	-1.81381	0.360127	0.735891	2.12019	0.198802	0.644091	3.93401	0.0994454	0.440217	0	1	1
circCHUK	chr14	120762010	120779168	-	8	ENSSSCT00000034911.1	CHUK	18,17,16,15,14,13,12,11	chr14:120761208-120762010|chr14:120779168-120780956	0	3	3	2	5	0	1	1	4	0	0	0	0	953.973	453.383	240.703	583.186	0	77.4553	121.365	531.576	0	0	0	0.706385	0.565376	0.860254	0.93939	0.448184	0.792244	3.94244	0.053409	0.368369	3.70943	0.0714621	0.508793
circCHUK_2	chr14	120786138	120845549	-	8	ENSSSCT00000034911.1	CHUK	9,8,7,6,5,4,3,2	chr14:120781151-120786138|chr14:120845549-120853985	0	0	0	1	0	0	2	0	0	0	0	0	0	0	0	120.351	0	0	154.911	0	0	0	0	0	-1.62559	0.435818	0.764449	-1.96272	0.372262	0.755908	1.62559	0.460801	0.690317	1.96272	0.396664	0.720629
circCLASP2	chr13	20986222	20990776	-	3	ENSSSCT00000012303.2	CLASP2	15,14,13	chr13:20984862-20986222|chr13:20990776-20996724	1	1	1	0	0	5	1	0	0	0	0	0	286.316	317.991	151.128	0	0	585.355	77.4553	0	0	0	0	0	0.285778	0.860621	1	2.38331	0.167236	0.623966	3.48885	0.117083	0.458743	1.39132	0.457497	0.734227
circCLCN1	chr18	7166209	7174491	-	5	ENSSSCT00000017925.2	CLCN1	10,9,8,7,6	chr18:7165595-7166209|chr18:7174491-7175863	1	0	2	6	4	0	2	0	1	0	0	0	286.316	0	302.256	722.108	466.549	0	154.911	0	132.894	0	0	0	-0.830438	0.51323	0.822345	0.963218	0.479596	0.805894	4.43787	0.0254306	0.287984	2.64422	0.197663	0.608094
circCLCN1_2	chr18	7175863	7177837	-	4	ENSSSCT00000017925.2	CLCN1	5,4,3,2	chr18:7174491-7175863|chr18:7177837-7181088	0	0	0	3	8	3	5	3	1	3	2	0	0	0	0	361.054	933.097	351.213	387.276	364.096	132.894	852.728	581.441	0	-4.89401	0.00257509	0.246566	-4.08554	0.0174184	0.334849	0.248552	0.784243	0.942892	-0.559922	0.55948	0.802472
circCLEC2D	chr5	65026932	65035386	-	3	ENSSSCT00000034328.1	CLEC2D	7,6,5	chr5:65024457-65026932|chr5:65035386-65038393	0	0	0	0	0	5	1	0	0	0	0	0	0	0	0	0	0	585.355	77.4553	0	0	0	0	0	-3.4866	0.242135	0.651868	-1.29464	0.508692	0.818548	3.4866	0.257307	0.564331	1.29464	0.531457	0.779539
circCLIP1	chr14	32141472	32145909	+	5	ENSSSCT00000010735.2	CLIP1	11,12,13,14,15	chr14:32137975-32141472|chr14:32145909-32152017	0	0	0	3	2	2	0	0	3	0	3	0	0	0	0	361.054	233.274	234.142	0	0	398.682	0	872.161	0	-3.94764	0.0559936	0.498382	-2.88182	0.159941	0.612742	-0.0293483	0.985253	1	-1.09517	0.481815	0.750176
circCLIP1_2	chr14	32154184	32181866	+	3	ENSSSCT00000010735.2	CLIP1	17,18,19	chr14:32152134-32154184|chr14:32181866-32188592	0	0	0	0	1	6	4	3	2	0	2	4	0	0	0	0	116.637	702.427	309.821	364.096	265.788	0	581.441	969.047	-3.93826	0.0346365	0.45914	-4.12099	0.0254364	0.372326	-0.90091	0.421211	0.673516	-0.718181	0.513998	0.773998
circCLIP4	chr3	116947784	116986374	-	13	ENSSSCT00000009339.2	CLIP4	14,13,12,11,10,9,8,7,6,5,4,3,2	chr3:116938704-116947784|chr3:116986374-117001543	0	0	3	5	3	2	2	0	0	0	0	1	0	0	453.383	601.756	349.911	234.142	154.911	0	0	0	0	242.262	-0.894935	0.427825	0.762693	1.4031	0.278646	0.693409	1.93755	0.1534	0.498604	-0.36049	0.822458	0.984756
circCLNS1A	chr9	13255480	13259345	-	4	ENSSSCT00000016235.2	CLNS1A	5,4,3,2	chr9:13249740-13255480|chr9:13259345-13265973	0	0	0	4	4	0	2	6	0	0	0	1	0	0	0	481.405	466.549	0	154.911	728.192	0	0	0	242.262	-4.12983	0.043687	0.470865	-4.02376	0.0491667	0.442154	1.65375	0.322498	0.608336	1.54768	0.35474	0.681666
circCLPX	chr1	180714490	180715180	-	2	ENSSSCT00000005437.2	CLPX	7,6	chr1:180713449-180714490|chr1:180715180-180723020	2	2	1	0	1	0	4	2	3	0	0	0	572.633	635.982	151.128	0	116.637	0	309.821	242.731	398.682	0	0	0	2.83121	0.0188226	0.385345	0.316145	0.728188	0.954909	1.61117	0.398356	0.666549	4.12623	0.0214047	0.377963
circCLPX_2	chr1	180714490	180723180	-	3	ENSSSCT00000005437.2	CLPX	7,6,5	chr1:180713449-180714490|chr1:180723180-180725339	0	1	3	1	1	4	11	5	3	1	0	0	0	317.991	453.383	120.351	116.637	468.284	852.008	606.827	398.682	284.243	0	0	0.286915	0.770709	0.963602	-1.0819	0.212912	0.657164	1.21681	0.356339	0.623497	2.58562	0.0242843	0.410014
circCMAS	chr5	54725892	54729869	-	4	ENSSSCT00000000615.2	CMAS	7,6,5,4	chr5:54720499-54725892|chr5:54729869-54731832	2	2	6	7	8	1	6	1	3	0	0	0	572.633	635.982	906.767	842.459	933.097	117.071	464.732	121.365	398.682	0	0	0	0.206282	0.801209	0.978699	1.06849	0.214855	0.659311	5.08561	0.00285288	0.127505	4.22341	0.0204264	0.375704
circCMAS_2	chr5	54725892	54732290	-	6	ENSSSCT00000000615.2	CMAS	7,6,5,4,3,2	chr5:54720499-54725892|chr5:54732290-54739650	0	0	0	0	4	1	1	0	0	1	0	0	0	0	0	0	466.549	117.071	77.4553	0	0	284.243	0	0	-3.4857	0.105821	0.581337	-1.38369	0.430406	0.783793	0.945914	0.607727	0.811594	-1.15609	0.546834	0.789741
circCMPK2	chr3	137691736	137693310	+	2	ENSSSCT00000009460.2	CMPK2	3,4	chr3:137690077-137691736|chr3:137693310-137700481	0	0	0	8	0	2	5	0	0	0	4	0	0	0	0	962.81	0	234.142	387.276	0	0	0	1162.88	0	-4.44805	0.0545643	0.498382	-3.05205	0.161226	0.613531	0.0611295	0.972298	1	-1.33487	0.460431	0.734227
circCNN2	chr2	77617730	77619823	+	6	ENSSSCT00000027330.1	CNN2	3,4,5,6,7,8	chr2:77616843-77617730|chr2:77619823-77620656	0	4	4	2	3	1	4	2	1	0	0	0	0	1271.96	604.511	240.703	349.911	117.071	309.821	242.731	132.894	0	0	0	1.30274	0.164884	0.622196	1.29223	0.161411	0.613531	3.73757	0.0492586	0.35248	3.74808	0.0467827	0.461487
circCNN2_2	chr2	77619455	77619823	+	2	ENSSSCT00000027330.1	CNN2	7,8	chr2:77619355-77619455|chr2:77619823-77620656	0	1	1	0	0	3	5	0	0	0	0	0	0	317.991	151.128	0	0	351.213	387.276	0	0	0	0	0	0.342379	0.865789	1	0.139994	0.947613	1	2.83483	0.230286	0.554513	3.03721	0.19997	0.608094
circCNOT1	chr6	18424721	18447166	+	13	ENSSSCT00000003099.2	CNOT1	12,13,14,15,16,17,18,19,20,21,22,23,24	chr6:18421604-18424721|chr6:18447166-18449173	0	1	1	4	2	9	1	4	0	1	0	2	0	317.991	151.128	481.405	233.274	1053.64	77.4553	485.461	0	284.243	0	484.524	-1.83312	0.11698	0.599738	-0.230639	0.857984	1	1.09333	0.319714	0.604446	-0.509155	0.670133	0.891986
circCNOT1_2	chr6	18426872	18428157	+	3	ENSSSCT00000003099.2	CNOT1	13,14,15	chr6:18424962-18426872|chr6:18428157-18436856	0	0	1	2	2	7	1	0	0	1	1	2	0	0	151.128	240.703	233.274	819.498	77.4553	0	0	284.243	290.72	484.524	-2.29749	0.0675584	0.52478	0.797853	0.609543	0.894367	0.255843	0.797015	0.955848	-2.8395	0.0275467	0.426251
circCNOT1_2	chr6	18449173	18463615	+	16	ENSSSCT00000003099.2	CNOT1	25,26,27,28,29,30,31,32,33,34,35,36,37,38,39,40	chr6:18447166-18449173|chr6:18463615-18464131	0	0	0	2	2	0	1	0	1	0	0	0	0	0	0	240.703	233.274	0	77.4553	0	132.894	0	0	0	-3.20884	0.104952	0.581337	-2.21548	0.248795	0.677032	3.20884	0.126517	0.466893	2.21548	0.280577	0.651471
circCNOT11	chr3	55619048	55623302	-	2	ENSSSCT00000008944.2	CNOT11	3,2	chr3:55615520-55619048|chr3:55623302-55626432	3	3	9	10	11	8	26	20	13	2	2	1	858.949	953.973	1360.15	1203.51	1283.01	936.569	2013.84	2427.31	1727.62	568.485	581.441	242.262	-0.0273899	0.957091	1	-0.868103	0.0574794	0.460983	1.30023	0.0480855	0.348127	2.14094	0.000299248	0.0436121
circCNOT2	chr5	37185162	37200230	+	15	ENSSSCT00000000541.2	CNOT2	4,5,6,7,8,9,10,11,12,13,14,15,16,17,18	chr5:37173822-37185162|chr5:37200230-37206981	1	0	1	0	1	0	2	0	1	0	0	1	286.316	0	151.128	0	116.637	0	154.911	0	132.894	0	0	242.262	1.53566	0.298917	0.692925	0.488631	0.715282	0.948428	-0.88723	0.58999	0.797438	0.159796	0.915107	1
circCNTLN	chr1	229233920	229246387	-	4	ENSSSCT00000005709.2	CNTLN	12,11,10,9	chr1:229214212-229233920|chr1:229246387-229296124	1	1	1	11	2	6	2	4	2	0	0	0	286.316	317.991	151.128	1323.86	233.274	702.427	154.911	485.461	265.788	0	0	0	-1.6106	0.108476	0.581337	-0.29655	0.784869	0.98275	5.33201	0.00162677	0.0943344	4.01796	0.0318785	0.437955
circCNTLN_2	chr1	229233920	229296319	-	5	ENSSSCT00000005709.2	CNTLN	12,11,10,9,8	chr1:229214212-229233920|chr1:229296319-229312607	1	0	1	0	1	1	1	0	1	0	0	0	286.316	0	151.128	0	116.637	117.071	77.4553	0	132.894	0	0	0	0.795271	0.555272	0.854186	0.932058	0.486659	0.809934	2.3522	0.240029	0.559503	2.21542	0.263562	0.649098
circCNTLN_3	chr1	229343178	229344099	-	2	ENSSSCT00000005709.2	CNTLN	5,4	chr1:229321286-229343178|chr1:229344099-229362625	0	0	1	0	4	0	1	0	0	0	0	0	0	0	151.128	0	466.549	0	77.4553	0	0	0	0	0	-1.13649	0.636558	0.915376	0.72803	0.73534	0.958595	3.19327	0.218544	0.541331	1.32874	0.496583	0.764058
circCOL11A1	chr4	127397997	127403795	+	3	ENSSSCT00000007510.2	COL11A1	61,62,63	chr4:127396219-127397997|chr4:127403795-127405879	0	0	0	3	0	0	0	0	0	0	0	0	0	0	0	361.054	0	0	0	0	0	0	0	0	-2.86269	0.251326	0.651868	0	1	1	2.86269	0.271747	0.564331	0	1	1
circCOL14A1	chr4	19821064	19821541	-	2	ENSSSCT00000035287.1	COL14A1	23,22	chr4:19819059-19821064|chr4:19821541-19824110	3	0	0	8	2	3	1	1	0	0	0	0	858.949	0	0	962.81	233.274	351.213	77.4553	121.365	0	0	0	0	-0.944031	0.458879	0.779211	1.66219	0.24965	0.677032	4.80301	0.0152314	0.22716	2.19678	0.280319	0.651471
circCOL14A1_2	chr4	19864425	19932911	-	15	ENSSSCT00000006580.2	COL14A1	16,15,14,13,12,11,10,9,8,7,6,5,4,3,2	chr4:19863940-19864425|chr4:19932911-19949478	0	1	0	1	0	1	3	0	8	0	1	2	0	317.991	0	120.351	0	117.071	232.366	0	1063.15	0	290.72	484.524	0.0728467	0.973858	1	-2.0935	0.174799	0.62612	-1.53454	0.301232	0.586236	0.631812	0.63974	0.863288
circCOL5A3	chr2	69189832	69190193	-	2	ENSSSCT00000014931.2	COL5A3	7,6	chr2:69188311-69189832|chr2:69190193-69192232	0	0	9	0	3	0	4	1	1	0	2	0	0	0	1360.15	0	349.911	0	309.821	121.365	132.894	0	581.441	0	1.95081	0.189632	0.649073	1.30811	0.359223	0.744503	-0.595668	0.717986	0.888632	0.0470246	0.97395	1
circCOPA	chr4	98044695	98061929	+	7	ENSSSCT00000006999.2	COPA	6,7,8,9,10,11,12	chr4:98043734-98044695|chr4:98061929-98063384	2	0	3	0	5	4	2	0	1	0	0	2	572.633	0	453.383	0	583.186	468.284	154.911	0	132.894	0	0	484.524	0.0342629	0.975015	1	1.66315	0.181903	0.632206	0.935413	0.471212	0.69246	-0.693478	0.622028	0.846888
circCOPA_2	chr4	98044695	98065430	+	9	ENSSSCT00000006999.2	COPA	6,7,8,9,10,11,12,13,14	chr4:98043734-98044695|chr4:98065430-98066560	0	0	6	0	0	1	2	0	1	0	1	0	0	0	906.767	0	0	117.071	154.911	0	132.894	0	290.72	0	2.65543	0.102434	0.581337	1.63629	0.279071	0.693863	-0.936234	0.613469	0.816335	0.0829	0.959031	1
circCOPA_3	chr4	98051659	98053981	+	3	ENSSSCT00000006999.2	COPA	7,8,9	chr4:98044805-98051659|chr4:98053981-98055530	0	0	1	11	5	11	13	3	4	0	0	2	0	0	151.128	1323.86	583.186	1287.78	1006.92	364.096	531.576	0	0	484.524	-3.54425	0.000787298	0.164939	-2.87741	0.00941441	0.257442	2.45539	0.00944771	0.201712	1.78856	0.0706956	0.508781
circCOPA_4	chr4	98051659	98055613	+	4	ENSSSCT00000006999.2	COPA	7,8,9,10	chr4:98044805-98051659|chr4:98055613-98060756	0	0	1	2	0	0	6	2	0	0	1	0	0	0	151.128	240.703	0	0	464.732	242.731	0	0	290.72	0	-0.18729	0.923021	1	-1.61895	0.32881	0.717592	-0.177709	0.920979	1	1.25395	0.451413	0.734227
circCOPA_5	chr4	98051659	98061929	+	6	ENSSSCT00000006999.2	COPA	7,8,9,10,11,12	chr4:98044805-98051659|chr4:98061929-98063384	1	3	3	7	3	2	5	3	0	2	0	6	286.316	953.973	453.383	842.459	349.911	234.142	387.276	364.096	0	568.485	0	1453.57	0.187157	0.835113	0.995838	0.973479	0.299056	0.701987	-0.547116	0.531455	0.742803	-1.33344	0.145052	0.578381
circCOPA_6	chr4	98051659	98065430	+	8	ENSSSCT00000006999.2	COPA	7,8,9,10,11,12,13,14	chr4:98044805-98051659|chr4:98065430-98066560	1	2	1	5	0	1	0	0	0	0	0	0	286.316	635.982	151.128	601.756	0	117.071	0	0	0	0	0	0	0.469179	0.747406	0.953584	4.22116	0.0129695	0.305423	3.75198	0.0814057	0.411935	0	1	1
circCOPG2	chr18	19271817	19296928	+	5	ENSSSCT00000018023.2	COPG2	8,9,10,11,12	chr18:19270364-19271817|chr18:19296928-19302553	0	0	0	2	0	1	3	0	0	0	0	0	0	0	0	240.703	0	117.071	232.366	0	0	0	0	0	-2.85225	0.216205	0.651868	-2.43042	0.266751	0.683599	2.85225	0.23856	0.55862	2.43042	0.291957	0.654407
circCOPG2_2	chr18	19294615	19296928	+	2	ENSSSCT00000018023.2	COPG2	11,12	chr18:19293658-19294615|chr18:19296928-19302553	1	0	0	0	0	0	1	3	6	0	0	0	286.316	0	0	0	0	0	77.4553	364.096	797.364	0	0	0	2.41685	0.160681	0.622196	-2.04104	0.211613	0.656555	0	1	1	4.45789	0.0360318	0.440027
circCOPS4	chr8	144590107	144590839	-	2	ENSSSCT00000010121.2	COPS4	6,5	chr8:144585844-144590107|chr8:144590839-144595149	0	0	0	0	2	0	1	0	0	0	0	0	0	0	0	0	233.274	0	77.4553	0	0	0	0	0	-2.34371	0.320313	0.704982	-1.31701	0.481289	0.805894	2.34371	0.343294	0.616461	1.31701	0.506864	0.767047
circCOPS7B	chr15	146201174	146205084	+	2	ENSSSCT00000023412.1	COPS7B	2,3	chr15:146199156-146201174|chr15:146205084-146207639	0	0	1	7	0	3	4	2	1	0	0	0	0	0	151.128	842.459	0	351.213	309.821	242.731	132.894	0	0	0	-2.23317	0.137801	0.603222	-1.51668	0.32204	0.713484	4.4423	0.0275056	0.298378	3.72581	0.0692255	0.505542
circCOPS7B_2	chr15	146201174	146207728	+	3	ENSSSCT00000023412.1	COPS7B	2,3,4	chr15:146199156-146201174|chr15:146207728-146260897	0	1	3	0	1	1	3	0	2	4	0	0	0	317.991	453.383	0	116.637	117.071	232.366	0	265.788	1136.97	0	0	1.60177	0.261607	0.654173	0.654855	0.623172	0.900204	-2.00066	0.164597	0.505339	-1.05374	0.434013	0.729046
circCOX5A	chr7	63319984	63322300	+	2	ENSSSCT00000027931.1	COX5A	2,3	chr7:63312186-63319984|chr7:63322300-63328125	1	2	5	3	3	3	8	4	0	1	0	0	286.316	635.982	755.639	361.054	349.911	351.213	619.642	485.461	0	284.243	0	0	0.69821	0.410087	0.753072	0.54449	0.508907	0.818548	1.76622	0.162197	0.505226	1.91994	0.118704	0.572872
circCOX5A_2	chr7	63319984	63328248	+	3	ENSSSCT00000027931.1	COX5A	2,3,4	chr7:63312186-63319984|chr7:63328248-63332290	0	0	0	0	0	0	0	3	0	0	0	0	0	0	0	0	0	0	0	364.096	0	0	0	0	0	1	1	-2.85736	0.252019	0.677695	0	1	1	2.85736	0.272496	0.651471
circCPEB3	chr14	113263791	113265936	-	2	ENSSSCT00000011456.2	CPEB3	7,6	chr14:113241733-113263791|chr14:113265936-113278816	0	0	0	0	0	0	0	2	0	0	0	2	0	0	0	0	0	0	0	242.731	0	0	0	484.524	0	1	1	-2.35499	0.294334	0.701214	-3.28337	0.115334	0.456174	-0.928378	0.673124	0.894574
circCPEB4	chr16	54816612	54825696	-	5	ENSSSCT00000018491.2	CPEB4	8,7,6,5,4	chr16:54813765-54816612|chr16:54825696-54837290	3	4	7	14	5	15	8	11	3	1	2	1	858.949	1271.96	1057.89	1684.92	583.186	1756.07	619.642	1335.02	398.682	284.243	581.441	242.262	-0.335182	0.593597	0.882758	0.43419	0.508538	0.818548	1.83318	0.0197722	0.252002	1.06381	0.199774	0.608094
circCPEB4_2	chr16	54816612	54837341	-	6	ENSSSCT00000018491.2	CPEB4	8,7,6,5,4,3	chr16:54813765-54816612|chr16:54837341-54857644	1	0	1	0	0	1	0	0	4	0	0	0	286.316	0	151.128	0	0	117.071	0	0	531.576	0	0	0	1.52179	0.445532	0.770184	-0.176129	0.931368	1	1.60796	0.43407	0.678374	3.30589	0.169546	0.601796
circCPEB4_3	chr16	54816612	54857726	-	7	ENSSSCT00000018491.2	CPEB4	8,7,6,5,4,3,2	chr16:54813765-54816612|chr16:54857726-54875576	0	1	2	2	7	3	7	1	5	2	1	3	0	317.991	302.256	240.703	816.46	351.213	542.187	121.365	664.47	568.485	290.72	726.785	-1.02019	0.289353	0.680727	-0.94944	0.322047	0.713484	-0.184556	0.827249	0.975924	-0.255305	0.761882	0.95221
circCPED1	chr18	27396025	27414502	-	9	ENSSSCT00000018092.2	CPED1	15,14,13,12,11,10,9,8,7	chr18:27306195-27396025|chr18:27414502-27447276	0	0	1	0	1	1	6	2	2	0	2	0	0	0	151.128	0	116.637	117.071	464.732	242.731	265.788	0	581.441	0	-0.085951	0.95773	1	-1.95212	0.1213	0.579834	-1.04625	0.439756	0.682635	0.81992	0.466464	0.734736
circCPNE3	chr4	55199067	55233036	-	14	ENSSSCT00000006728.2	CPNE3	15,14,13,12,11,10,9,8,7,6,5,4,3,2	chr4:55195897-55199067|chr4:55233036-55251027	0	0	0	2	0	1	0	0	3	0	0	0	0	0	0	240.703	0	117.071	0	0	398.682	0	0	0	-2.85259	0.228264	0.651868	-2.94358	0.218983	0.659311	2.85259	0.249984	0.564331	2.94358	0.240121	0.636434
circCPNE3_2	chr4	55214191	55233036	-	8	ENSSSCT00000006728.2	CPNE3	9,8,7,6,5,4,3,2	chr4:55212711-55214191|chr4:55233036-55251027	0	1	5	1	3	3	5	1	0	0	2	1	0	317.991	755.639	120.351	349.911	351.213	387.276	121.365	0	0	581.441	242.262	0.547459	0.592048	0.882003	1.02736	0.32519	0.715292	0.0143181	0.989765	1	-0.465581	0.693235	0.905935
circCPSF3	chr3	135140352	135151621	-	7	ENSSSCT00000027309.1	CPSF3	17,16,15,14,13,12,11	chr3:135137606-135140352|chr3:135151621-135154828	0	0	1	0	3	5	3	1	1	0	1	2	0	0	151.128	0	349.911	585.355	232.366	121.365	132.894	0	290.72	484.524	-1.87391	0.171247	0.628171	-1.05229	0.462061	0.802145	0.216839	0.85152	0.988329	-0.604776	0.616771	0.843378
circCPSF3_2	chr3	135154828	135167280	-	7	ENSSSCT00000027309.1	CPSF3	10,9,8,7,6,5,4	chr3:135151621-135154828|chr3:135167280-135167868	0	0	1	0	2	0	1	0	4	0	0	0	0	0	151.128	0	233.274	0	77.4553	0	531.576	0	0	0	-0.229785	0.91638	1	-1.38625	0.491081	0.811421	2.34582	0.29379	0.578264	3.50229	0.141297	0.578381
circCPT2	chr6	146754275	146755580	-	1	ENSSSCT00000004263.2	CPT2	4	chr6:146702988-146754275|chr6:146755580-146759545	0	0	3	7	2	8	0	0	0	0	0	0	0	0	453.383	842.459	233.274	936.569	0	0	0	0	0	0	-1.68818	0.17719	0.634312	3.48391	0.0260898	0.373786	5.17209	0.00748321	0.185805	0	1	1
circCREBBP	chr3	39564462	39565175	+	1	ENSSSCT00000008714.2	CREBBP	2	chr3:39539453-39564462|chr3:39565175-39600536	0	0	1	3	5	0	9	1	1	3	1	2	0	0	151.128	361.054	583.186	0	697.097	121.365	132.894	852.728	290.72	484.524	-1.88537	0.174381	0.63192	-1.9968	0.141959	0.602161	-0.749291	0.482174	0.699372	-0.637869	0.542271	0.787899
circCREBBP_2	chr3	39564462	39600713	+	2	ENSSSCT00000008714.2	CREBBP	2,3	chr3:39539453-39564462|chr3:39600713-39621255	2	0	1	0	0	1	4	1	0	2	0	0	572.633	0	151.128	0	0	117.071	309.821	121.365	0	568.485	0	0	2.12633	0.177036	0.634312	0.544581	0.703406	0.944141	-1.80081	0.272883	0.564331	-0.219061	0.886755	1
circCREBBP_3	chr3	39564462	39622856	+	4	ENSSSCT00000008714.2	CREBBP	2,3,4,5	chr3:39539453-39564462|chr3:39622856-39631652	0	1	0	3	3	0	1	1	0	0	1	0	0	317.991	0	361.054	349.911	0	77.4553	121.365	0	0	290.72	0	-1.3331	0.373168	0.739279	0.209788	0.90597	1	1.20705	0.427384	0.674643	-0.335838	0.839872	0.99389
circCREBBP_4	chr3	39621255	39622856	+	2	ENSSSCT00000008714.2	CREBBP	4,5	chr3:39600713-39621255|chr3:39622856-39631652	0	0	2	0	2	0	2	0	2	0	0	1	0	0	302.256	0	233.274	0	154.911	0	265.788	0	0	242.262	0.600342	0.702545	0.944312	-0.104359	0.954448	1	-0.12768	0.940137	1	0.577021	0.73798	0.937696
circCREBBP_5	chr3	39633511	39635229	+	3	ENSSSCT00000008714.2	CREBBP	7,8,9	chr3:39631895-39633511|chr3:39635229-39635915	0	1	1	1	2	0	2	0	0	1	0	2	0	317.991	151.128	120.351	233.274	0	154.911	0	0	284.243	0	484.524	0.318225	0.814887	0.986102	1.02896	0.467037	0.804873	-1.05625	0.409244	0.670438	-1.76698	0.18462	0.606621
circCRLS1	chr17	15999828	16003676	+	3	ENSSSCT00000007717.2	CRLS1	4,5,6	chr17:15985714-15999828|chr17:16003676-16005554	0	0	0	0	1	1	2	0	0	0	0	0	0	0	0	0	116.637	117.071	154.911	0	0	0	0	0	-2.34566	0.30996	0.702968	-1.97184	0.359591	0.744503	2.34566	0.333694	0.615072	1.97184	0.385	0.709467
circCSDE1	chr4	116008616	116009969	+	2	ENSSSCT00000007397.2	CSDE1	5,6	chr4:116007163-116008616|chr4:116009969-116013525	5	1	5	13	19	18	39	11	10	3	0	1	1431.58	317.991	755.639	1564.57	2216.11	2107.28	3020.76	1335.02	1328.94	852.728	0	242.262	-1.21619	0.0541499	0.498382	-1.20305	0.0549909	0.458531	2.38083	0.00166042	0.0943344	2.36769	0.00165921	0.150315
circCSDE1_2	chr4	116008616	116017460	+	8	ENSSSCT00000007397.2	CSDE1	5,6,7,8,9,10,11,12	chr4:116007163-116008616|chr4:116017460-116021467	0	0	2	0	0	0	0	2	4	0	0	0	0	0	302.256	0	0	0	0	242.731	531.576	0	0	0	2.8531	0.128562	0.602346	-0.972411	0.634882	0.905971	0	1	1	3.82551	0.124404	0.572872
circCSDE1_3	chr4	116017069	116017460	+	2	ENSSSCT00000007397.2	CSDE1	11,12	chr4:116015126-116017069|chr4:116017460-116021467	2	2	7	4	5	0	10	2	1	1	1	0	572.633	635.982	1057.89	481.405	583.186	0	774.553	242.731	132.894	284.243	290.72	0	1.11242	0.21434	0.651868	0.904083	0.29829	0.701987	0.888783	0.446957	0.688262	1.09712	0.333392	0.672453
circCSGALNACT2	chr14	66220251	66231536	+	5	ENSSSCT00000011166.2	CSGALNACT2	2,3,4,5,6	chr14:66203268-66220251|chr14:66231536-66241560	0	0	2	4	3	1	1	1	4	0	1	3	0	0	302.256	481.405	349.911	117.071	77.4553	121.365	531.576	0	290.72	726.785	-1.07974	0.3756	0.740174	-0.629634	0.619752	0.90009	-0.1535	0.887234	1	-0.603602	0.587377	0.821827
circCSNK1E	chr5	6890150	6890544	+	2	ENSSSCT00000022980.1	CSNK1E	3,4	chr5:6880978-6890150|chr5:6890544-6893186	1	0	0	4	3	0	2	0	0	0	1	0	286.316	0	0	481.405	349.911	0	154.911	0	0	0	290.72	0	-1.53233	0.353803	0.732518	0.349684	0.854712	1	1.40841	0.39905	0.666549	-0.4736	0.795548	0.972894
circCTIF	chr1	107808626	107835060	+	4	ENSSSCT00000004978.2	CTIF	3,4,5,6	chr1:107795405-107808626|chr1:107835060-107885623	1	0	0	0	1	3	0	0	0	0	0	0	286.316	0	0	0	116.637	351.213	0	0	0	0	0	0	-0.743074	0.690674	0.942654	2.45468	0.160315	0.612742	3.19775	0.162005	0.505226	0	1	1
circCTNNA1	chr2	146476769	146479009	+	2	ENSSSCT00000015666.2	CTNNA1	2,3	chr2:146440755-146476769|chr2:146479009-146504493	0	0	1	1	6	0	0	0	0	0	0	2	0	0	151.128	120.351	699.823	0	0	0	0	0	0	484.524	-1.80992	0.351369	0.730496	2.12687	0.195038	0.641969	0.635402	0.729373	0.896731	-3.30139	0.0716599	0.508793
circCTNNA1_2	chr2	146504493	146516158	+	4	ENSSSCT00000015666.2	CTNNA1	4,5,6,7	chr2:146479009-146504493|chr2:146516158-146580998	0	0	0	0	1	3	0	0	0	0	0	0	0	0	0	0	116.637	351.213	0	0	0	0	0	0	-3.1963	0.200038	0.649073	0	1	1	3.1963	0.218954	0.541331	0	1	1
circCTNNA1_3	chr2	146512838	146516158	+	2	ENSSSCT00000015666.2	CTNNA1	6,7	chr2:146505301-146512838|chr2:146516158-146580998	0	0	1	2	4	3	1	0	0	0	0	0	0	0	151.128	240.703	466.549	351.213	77.4553	0	0	0	0	0	-2.00448	0.0979803	0.580265	0.80241	0.601171	0.889398	4.28475	0.015533	0.228506	1.47785	0.424471	0.729046
circCTR9	chr2	52058461	52059381	-	2	ENSSSCT00000014646.2	CTR9	15,14	chr2:52058005-52058461|chr2:52059381-52059923	0	0	0	0	3	2	0	0	0	0	0	0	0	0	0	0	349.911	234.142	0	0	0	0	0	0	-3.48446	0.18373	0.644207	0	1	1	3.48446	0.200428	0.531093	0	1	1
circCTSS	chr4	107670742	107671822	+	2	ENSSSCT00000007284.2	CTSS	3,4	chr4:107667512-107670742|chr4:107671822-107674019	0	0	0	1	3	1	2	1	0	2	0	2	0	0	0	120.351	349.911	117.071	154.911	121.365	0	568.485	0	484.524	-3.49419	0.0542757	0.498382	-2.65616	0.150239	0.608593	-0.807473	0.456695	0.689477	-1.6455	0.15297	0.58735
circCU407238.7	chr4	15217342	15217662	+	2	ENSSSCT00000006552.2	CU407238.7	21,22	chr4:15215507-15217342|chr4:15217662-15219475	1	1	0	6	1	2	4	1	1	1	1	1	286.316	317.991	0	722.108	116.637	234.142	309.821	121.365	132.894	284.243	290.72	242.262	-1.06353	0.344063	0.72824	-0.298008	0.79533	0.988345	0.3691	0.726073	0.894779	-0.396421	0.721792	0.926636
circCUL1	chr9	120394454	120402185	-	5	ENSSSCT00000016837.2	CUL1	21,20,19,18,17	chr9:120393739-120394454|chr9:120402185-120403244	0	0	1	0	2	0	1	0	0	0	0	0	0	0	151.128	0	233.274	0	77.4553	0	0	0	0	0	-0.289523	0.909015	1	0.727117	0.737005	0.959202	2.34414	0.329817	0.613013	1.3275	0.497611	0.764058
circCUL1_2	chr9	120426042	120441453	-	6	ENSSSCT00000016837.2	CUL1	8,7,6,5,4,3	chr9:120410974-120426042|chr9:120441453-120444016	0	0	0	2	1	3	4	0	0	0	0	0	0	0	0	240.703	116.637	351.213	309.821	0	0	0	0	0	-3.73852	0.0664397	0.52478	-2.83865	0.15327	0.610304	3.73852	0.0814776	0.411935	2.83865	0.178776	0.603178
circCUL5	chr9	40513546	40532789	+	6	ENSSSCT00000029949.1	CUL5	2,3,4,5,6,7	chr9:40496672-40513546|chr9:40532789-40552033	0	0	5	0	0	0	1	1	0	0	0	0	0	0	755.639	0	0	0	77.4553	121.365	0	0	0	0	3.95793	0.0524175	0.490792	1.77871	0.368767	0.754302	0	1	1	2.17922	0.329051	0.672453
circCUL5_2	chr9	40532480	40554238	+	5	ENSSSCT00000029949.1	CUL5	6,7,8,9,10	chr9:40530024-40532480|chr9:40554238-40557821	0	0	0	0	0	0	2	5	0	1	0	0	0	0	0	0	0	0	154.911	606.827	0	284.243	0	0	0	1	1	-3.83118	0.0931444	0.548606	-2.54376	0.168901	0.508992	1.28742	0.516305	0.774081
circCUL5_3	chr9	40532480	40557886	+	6	ENSSSCT00000029949.1	CUL5	6,7,8,9,10,11	chr9:40530024-40532480|chr9:40557886-40568080	0	0	0	1	0	0	0	1	3	0	0	0	0	0	0	120.351	0	0	0	121.365	398.682	0	0	0	-1.62339	0.411359	0.753072	-3.29118	0.167693	0.623966	1.62339	0.439253	0.682635	3.29118	0.186731	0.606976
circCUL5_3	chr9	40552033	40557886	+	4	ENSSSCT00000029949.1	CUL5	8,9,10,11	chr9:40532789-40552033|chr9:40557886-40568080	0	0	0	0	1	2	4	2	1	0	0	1	0	0	0	0	116.637	234.142	309.821	242.731	132.894	0	0	242.262	-2.83999	0.122836	0.602346	-3.75373	0.0306948	0.395014	0.334211	0.817784	0.97267	1.24795	0.341014	0.674952
circCUL5_4	chr9	40572084	40573450	+	3	ENSSSCT00000029949.1	CUL5	14,15,16	chr9:40569423-40572084|chr9:40573450-40574876	1	0	1	1	1	2	8	3	0	0	0	1	286.316	0	151.128	120.351	116.637	234.142	619.642	364.096	0	0	0	242.262	-0.0595079	0.964124	1	-1.12343	0.350485	0.735186	0.708555	0.633999	0.831117	1.77248	0.193995	0.606976
circCWC27	chr16	46608540	46612699	+	3	ENSSSCT00000018450.2	CWC27	8,9,10	chr16:46596137-46608540|chr16:46612699-46769049	1	0	0	0	0	0	4	3	2	0	1	0	286.316	0	0	0	0	0	309.821	364.096	265.788	0	290.72	0	2.33198	0.145979	0.618747	-1.78971	0.145834	0.603499	-2.52125	0.126538	0.466893	1.60044	0.203771	0.609866
circCWF19L2	chr9	40043107	40068725	-	4	ENSSSCT00000026318.1	CWF19L2	16,15,14,13	chr9:40042776-40043107|chr9:40068725-40076778	0	0	0	0	1	1	0	0	2	0	0	1	0	0	0	0	116.637	117.071	0	0	265.788	0	0	242.262	-2.34735	0.263252	0.655369	-2.40563	0.257385	0.679981	-0.110743	0.953023	1	-0.0524576	0.970905	1
circCWF19L2_2	chr9	40066681	40068725	-	2	ENSSSCT00000026318.1	CWF19L2	14,13	chr9:40045189-40066681|chr9:40068725-40076778	0	2	0	2	5	1	5	6	12	0	0	3	0	635.982	0	240.703	583.186	117.071	387.276	728.192	1594.73	0	0	726.785	-0.845364	0.487842	0.802772	-2.27998	0.0461005	0.437012	0.245978	0.832089	0.978311	1.68059	0.117246	0.572872
circDARS	chr15	18299031	18323838	+	4	ENSSSCT00000017089.2	DARS	4,5,6,7	chr15:18276954-18299031|chr15:18323838-18325855	0	0	3	2	2	0	0	0	0	0	0	0	0	0	453.383	240.703	233.274	0	0	0	0	0	0	0	0.133726	0.93812	1	3.34377	0.0710449	0.495467	3.21005	0.175834	0.508992	0	1	1
circDARS_2	chr15	18325855	18330560	+	3	ENSSSCT00000017089.2	DARS	8,9,10	chr15:18323838-18325855|chr15:18330560-18336709	0	0	0	1	2	1	4	2	1	0	0	0	0	0	0	120.351	233.274	117.071	309.821	242.731	132.894	0	0	0	-3.20558	0.0704123	0.52478	-3.77039	0.0243698	0.36722	3.20558	0.0923503	0.427909	3.77039	0.0362741	0.440027
circDARS_3	chr15	18325855	18336856	+	4	ENSSSCT00000017089.2	DARS	8,9,10,11	chr15:18323838-18325855|chr15:18336856-18338119	0	3	5	2	5	6	7	6	2	1	2	0	0	953.973	755.639	240.703	583.186	702.427	542.187	728.192	265.788	284.243	581.441	0	0.205679	0.78824	0.971794	0.182516	0.809126	0.993625	0.857414	0.359994	0.626858	0.880578	0.341485	0.675314
circDARS_4	chr15	18325855	18339494	+	6	ENSSSCT00000017089.2	DARS	8,9,10,11,12,13	chr15:18323838-18325855|chr15:18339494-18340403	0	0	3	2	1	9	7	3	1	0	0	1	0	0	453.383	240.703	116.637	1053.64	542.187	364.096	132.894	0	0	242.262	-1.16252	0.321024	0.705622	-0.78892	0.503943	0.815292	2.18595	0.11581	0.456174	1.81235	0.197034	0.608094
circDARS_5	chr15	18325855	18341032	+	8	ENSSSCT00000017089.2	DARS	8,9,10,11,12,13,14,15	chr15:18323838-18325855|chr15:18341032-18343597	0	0	1	1	0	3	0	0	0	0	0	0	0	0	151.128	120.351	0	351.213	0	0	0	0	0	0	-1.09566	0.59278	0.882326	2.10936	0.205201	0.652594	3.20501	0.177301	0.508992	0	1	1
circDARS2	chr9	127746261	127755157	+	6	ENSSSCT00000016876.2	DARS2	3,4,5,6,7,8	chr9:127745292-127746261|chr9:127755157-127756559	0	0	0	1	0	5	0	2	0	0	0	0	0	0	0	120.351	0	585.355	0	242.731	0	0	0	0	-3.73407	0.129239	0.602346	-2.3522	0.287933	0.69783	3.73407	0.144752	0.495808	2.3522	0.313417	0.665342
circDBT	chr4	129522756	129539754	+	6	ENSSSCT00000007519.2	DBT	2,3,4,5,6,7	chr4:129512328-129522756|chr4:129539754-129543452	2	0	2	0	3	4	0	0	0	0	1	0	572.633	0	302.256	0	349.911	468.284	0	0	0	0	290.72	0	0.113614	0.931219	1	4.04973	0.0120997	0.294497	1.3983	0.375061	0.641756	-2.53781	0.128436	0.574282
circDCAF10	chr1	266604252	266606482	+	2	ENSSSCT00000005896.2	DCAF10	6,7	chr1:266593107-266604252|chr1:266606482-266610240	0	0	0	4	0	1	1	0	0	0	1	0	0	0	0	481.405	0	117.071	77.4553	0	0	0	290.72	0	-3.51025	0.105255	0.581337	-1.38209	0.431326	0.783793	0.959628	0.605229	0.810392	-1.16853	0.545024	0.788557
circDCAF13	chr4	36469353	36472616	-	3	ENSSSCT00000006637.2	DCAF13	4,3,2	chr4:36467624-36469353|chr4:36472616-36477051	0	0	0	3	0	6	0	1	1	0	0	0	0	0	0	361.054	0	702.427	0	121.365	132.894	0	0	0	-4.28782	0.0446324	0.473497	-2.35261	0.247243	0.677032	4.28782	0.0546321	0.369595	2.35261	0.276327	0.651471
circDCAF17	chr15	86948960	86982555	+	12	ENSSSCT00000023821.1	DCAF17	2,3,4,5,6,7,8,9,10,11,12,13	chr15:86948540-86948960|chr15:86982555-86983334	0	0	0	0	1	0	0	4	0	0	0	1	0	0	0	0	116.637	0	0	485.461	0	0	0	242.262	-1.60437	0.433708	0.763737	-3.22573	0.210442	0.656407	-0.829201	0.72832	0.89623	0.792154	0.755676	0.949187
circDCBLD1	chr1	49668383	49672750	-	2	ENSSSCT00000004702.2	DCBLD1	4,3	chr1:49661866-49668383|chr1:49672750-49674470	0	0	1	0	1	0	2	2	2	0	0	0	0	0	151.128	0	116.637	0	154.911	242.731	265.788	0	0	0	0.66938	0.664571	0.931677	-1.31759	0.305513	0.706749	1.61124	0.398066	0.666549	3.59821	0.0542953	0.473818
circDCLRE1C	chr10	51578403	51586857	+	6	ENSSSCT00000012093.1	DCLRE1C	8,9,10,11,12,13	chr10:51577504-51578403|chr10:51586857-51587771	0	0	0	1	0	1	3	0	0	0	0	0	0	0	0	120.351	0	117.071	232.366	0	0	0	0	0	-2.35944	0.290533	0.680727	-2.42387	0.275004	0.688831	2.35944	0.315572	0.601644	2.42387	0.299708	0.656925
circDCP2	chr2	121383216	121383808	-	3	ENSSSCT00000015522.2	DCP2	7,6,5	chr2:121380994-121383216|chr2:121383808-121405390	0	0	0	4	0	0	0	0	0	0	0	0	0	0	0	481.405	0	0	0	0	0	0	0	0	-3.22755	0.196127	0.649073	0	1	1	3.22755	0.214872	0.541331	0	1	1
circDCP2_2	chr2	121405390	121414614	-	3	ENSSSCT00000015522.2	DCP2	4,3,2	chr2:121383808-121405390|chr2:121414614-121425948	0	1	4	5	6	9	10	3	3	0	1	2	0	317.991	604.511	601.756	699.823	1053.64	774.553	364.096	398.682	0	290.72	484.524	-1.0697	0.164507	0.622196	-0.542726	0.495845	0.812411	1.48132	0.0858654	0.422021	0.954347	0.286906	0.653682
circDCUN1D1	chr13	130356499	130372748	+	5	ENSSSCT00000025068.1	DCUN1D1	2,3,4,5,6	chr13:130341561-130356499|chr13:130372748-130375041	1	4	10	13	15	19	61	37	20	3	10	4	286.316	1271.96	1511.28	1564.57	1749.56	2224.35	4724.77	4490.52	2657.88	852.728	2907.2	969.047	-0.750328	0.181507	0.639716	-1.85317	0.000471445	0.0438967	0.250436	0.647606	0.840083	1.35328	0.00880172	0.272478
circDCUN1D1_2	chr13	130356499	130360814	+	3	ENSSSCT00000025068.1	DCUN1D1	2,3,4	chr13:130341561-130356499|chr13:130360814-130372352	4	3	10	8	17	12	54	24	29	2	5	6	1145.27	953.973	1511.28	962.81	1982.83	1404.85	4182.58	2912.77	3853.93	568.485	1453.6	1453.57	-0.200846	0.689937	0.942654	-1.52743	0.000710275	0.0557872	0.308598	0.561706	0.771339	1.63518	0.000577339	0.0774096
circDCUN1D1_3	chr13	130358253	130360814	+	2	ENSSSCT00000025068.1	DCUN1D1	3,4	chr13:130356716-130358253|chr13:130360814-130372352	0	0	2	0	0	3	3	1	4	0	0	0	0	0	302.256	0	0	351.213	232.366	121.365	531.576	0	0	0	0.13785	0.919485	1	-1.04129	0.473035	0.804873	2.83721	0.178751	0.508992	4.01635	0.0536794	0.473818
circDCUN1D2	chr11	86426858	86437276	-	3	ENSSSCT00000028205.1	DCUN1D2	5,4,3	chr11:86426710-86426858|chr11:86437276-86439718	0	0	4	0	3	2	7	3	0	0	0	1	0	0	604.511	0	349.911	234.142	542.187	364.096	0	0	0	242.262	0.323402	0.8039	0.979864	-0.313274	0.812203	0.995796	1.0051	0.53185	0.742803	1.64177	0.290394	0.653682
circDCUN1D2_2	chr11	86434905	86437276	-	2	ENSSSCT00000028205.1	DCUN1D2	4,3	chr11:86426989-86434905|chr11:86437276-86439718	0	0	0	0	0	0	3	2	0	0	0	0	0	0	0	0	0	0	232.366	242.731	0	0	0	0	0	1	1	-3.23262	0.188649	0.639087	0	1	1	3.23262	0.207494	0.611265
circDCUN1D4	chr8	41183978	41196969	+	4	ENSSSCT00000009666.2	DCUN1D4	2,3,4,5	chr8:41159792-41183978|chr8:41196969-41202469	1	1	1	0	0	0	2	0	1	1	0	0	286.316	317.991	151.128	0	0	0	154.911	0	132.894	284.243	0	0	3.72822	0.017078	0.374154	1.06922	0.391478	0.765683	-2.52366	0.131172	0.474826	0.135339	0.925612	1
circDCUN1D4_2	chr8	41183978	41202540	+	5	ENSSSCT00000009666.2	DCUN1D4	2,3,4,5,6	chr8:41159792-41183978|chr8:41202540-41208224	0	0	0	0	1	2	1	2	3	0	0	1	0	0	0	0	116.637	234.142	77.4553	242.731	398.682	0	0	242.262	-2.83835	0.133987	0.602346	-3.67378	0.0468312	0.437012	0.3421	0.82358	0.973771	1.17753	0.414077	0.729046
circDCUN1D4_3	chr8	41183978	41208316	+	6	ENSSSCT00000009666.2	DCUN1D4	2,3,4,5,6,7	chr8:41159792-41183978|chr8:41208316-41215984	0	0	0	1	1	1	1	2	0	2	0	0	0	0	0	120.351	116.637	117.071	77.4553	242.731	0	568.485	0	0	-2.84214	0.136045	0.602346	-2.70787	0.153297	0.610304	-0.559523	0.6866	0.868156	-0.693792	0.615505	0.843378
circDCUN1D4_4	chr8	41183978	41216093	+	7	ENSSSCT00000009666.2	DCUN1D4	2,3,4,5,6,7,8	chr8:41159792-41183978|chr8:41216093-41229981	3	1	2	2	11	8	16	4	0	0	2	1	858.949	317.991	302.256	240.703	1283.01	936.569	1239.28	485.461	0	0	581.441	242.262	-0.771559	0.417945	0.760148	-0.354238	0.709384	0.94656	1.53154	0.146858	0.495876	1.11422	0.29429	0.65626
circDDHD1	chr1	202944044	202986161	-	10	ENSSSCT00000005559.2	DDHD1	11,10,9,8,7,6,5,4,3,2	chr1:202941276-202944044|chr1:202986161-203017716	0	1	1	0	2	1	2	0	0	0	0	0	0	317.991	151.128	0	233.274	117.071	154.911	0	0	0	0	0	0.328069	0.825368	0.991269	1.07007	0.484372	0.808574	2.83606	0.175102	0.508992	2.09405	0.296836	0.656761
circDDHD1_2	chr1	202954151	202986161	-	7	ENSSSCT00000005559.2	DDHD1	8,7,6,5,4,3,2	chr1:202948476-202954151|chr1:202986161-203017716	0	1	6	0	4	6	0	2	1	0	1	0	0	317.991	906.767	0	466.549	702.427	0	242.731	132.894	0	290.72	0	0.199611	0.864949	1	1.8071	0.161436	0.613531	1.88553	0.213655	0.541331	0.278042	0.867458	1
circDDHD1_3	chr1	202963752	202986161	-	5	ENSSSCT00000005559.2	DDHD1	6,5,4,3,2	chr1:202955895-202963752|chr1:202986161-203017716	0	0	1	2	2	0	0	0	0	0	0	2	0	0	151.128	240.703	233.274	0	0	0	0	0	0	484.524	-1.05456	0.560726	0.857735	2.155	0.18056	0.631114	-0.101982	0.949968	1	-3.31154	0.0592226	0.488951
circDDHD1_4	chr1	202974506	202986161	-	3	ENSSSCT00000005559.2	DDHD1	4,3,2	chr1:202970134-202974506|chr1:202986161-203017716	1	0	2	1	0	1	9	0	1	0	2	5	286.316	0	302.256	120.351	0	117.071	697.097	0	132.894	0	581.441	1211.31	1.25001	0.376216	0.740174	-0.447058	0.723766	0.953641	-2.68376	0.0418059	0.337211	-0.986688	0.396187	0.720629
circDDHD2	chr15	55433779	55440711	-	9	ENSSSCT00000017226.2	DDHD2	16,15,14,13,12,11,10,9,8	chr15:55417865-55433779|chr15:55440711-55444707	1	0	1	3	3	1	3	0	0	0	1	1	286.316	0	151.128	361.054	349.911	117.071	232.366	0	0	0	290.72	242.262	-0.798771	0.499149	0.811316	0.541239	0.680269	0.933922	0.566712	0.63495	0.831837	-0.773299	0.558764	0.802233
circDDI2	chr6	69151419	69154853	-	2	ENSSSCT00000003848.1	DDI2	6,5	chr6:69145651-69151419|chr6:69154853-69159388	0	0	0	6	12	3	7	3	13	3	1	2	0	0	0	722.108	1399.65	351.213	542.187	364.096	1727.62	852.728	290.72	484.524	-5.46391	0.000457312	0.140868	-5.51177	0.000383128	0.0377719	0.589421	0.493454	0.708072	0.637285	0.457654	0.734227
circDDI2_2	chr6	69145547	69154853	-	3	ENSSSCT00000003848.1	DDI2	7,6,5	chr6:69143487-69145547|chr6:69154853-69159388	2	0	0	1	0	3	0	0	4	1	0	1	572.633	0	0	120.351	0	351.213	0	0	531.576	284.243	0	242.262	0.151519	0.934714	1	0.0699905	0.96884	1	-0.158761	0.927384	1	-0.0772329	0.961611	1
circDDI2_3	chr6	69151419	69166153	-	5	ENSSSCT00000003848.1	DDI2	6,5,4,3,2	chr6:69145651-69151419|chr6:69166153-69174250	0	0	3	1	4	4	15	7	9	1	1	1	0	0	453.383	120.351	466.549	468.284	1161.83	849.557	1196.05	284.243	290.72	242.262	-0.644567	0.492087	0.80659	-2.19783	0.00523283	0.191227	0.362139	0.7024	0.877458	1.91541	0.0163941	0.343093
circDDI2_4	chr6	69159388	69166153	-	3	ENSSSCT00000003848.1	DDI2	4,3,2	chr6:69154853-69159388|chr6:69166153-69174250	0	0	0	1	0	2	3	0	2	0	0	0	0	0	0	120.351	0	234.142	232.366	0	265.788	0	0	0	-2.84295	0.152662	0.622196	-3.29556	0.0966748	0.552014	2.84295	0.178559	0.508992	3.29556	0.117011	0.572872
circDDX17	chr5	6771299	6772570	+	3	ENSSSCT00000000110.2	DDX17	3,4,5	chr5:6770061-6771299|chr5:6772570-6774341	1	1	0	0	3	1	0	5	1	1	1	0	286.316	317.991	0	0	349.911	117.071	0	606.827	132.894	284.243	290.72	0	0.138484	0.932641	1	-0.403084	0.781729	0.981406	-0.218391	0.886071	1	0.323177	0.827687	0.986251
circDDX17_2	chr5	6771299	6775274	+	6	ENSSSCT00000000110.2	DDX17	3,4,5,6,7,8	chr5:6770061-6771299|chr5:6775274-6775856	0	0	2	0	0	0	0	3	0	0	1	0	0	0	302.256	0	0	0	0	364.096	0	0	290.72	0	2.80623	0.166236	0.622196	-0.0488578	0.989681	1	-2.56985	0.205599	0.539256	0.285241	0.906314	1
circDDX17_3	chr5	6774341	6775274	+	3	ENSSSCT00000000110.2	DDX17	6,7,8	chr5:6772570-6774341|chr5:6775274-6775856	1	0	3	3	4	1	0	0	3	0	0	0	286.316	0	453.383	361.054	466.549	117.071	0	0	398.682	0	0	0	-0.18787	0.884969	1	1.09015	0.415159	0.779399	4.12619	0.0425386	0.337211	2.84817	0.174242	0.601796
circDDX21	chr14	78059544	78063812	+	4	ENSSSCT00000011217.2	DDX21	8,9,10,11	chr14:78059439-78059544|chr14:78063812-78065094	1	1	2	2	1	6	1	0	3	1	0	0	286.316	317.991	302.256	240.703	116.637	702.427	77.4553	0	398.682	284.243	0	0	-0.215539	0.841529	0.996861	0.953254	0.411044	0.777989	1.76061	0.196621	0.524322	0.591818	0.690101	0.904511
circDDX46	chr2	142611354	142616391	+	4	ENSSSCT00000027801.1	DDX46	12,13,14,15	chr2:142609586-142611354|chr2:142616391-142624802	1	0	0	1	0	0	2	0	0	0	0	0	286.316	0	0	120.351	0	0	154.911	0	0	0	0	0	0.882139	0.708047	0.946699	0.530028	0.82831	1	1.62459	0.449809	0.688481	1.9767	0.379321	0.707619
circDDX50	chr14	78014860	78020135	+	5	ENSSSCT00000011216.2	DDX50	3,4,5,6,7	chr14:78009987-78014860|chr14:78020135-78026223	0	0	0	6	2	1	0	0	0	0	0	0	0	0	0	722.108	233.274	117.071	0	0	0	0	0	0	-4.29622	0.0305543	0.457043	0	1	1	4.29622	0.0394266	0.33183	0	1	1
circDDX50_2	chr14	78014860	78026373	+	6	ENSSSCT00000011216.2	DDX50	3,4,5,6,7,8	chr14:78009987-78014860|chr14:78026373-78034831	0	0	0	1	6	1	1	1	0	0	0	1	0	0	0	120.351	699.823	117.071	77.4553	121.365	0	0	0	242.262	-4.11925	0.029993	0.457043	-2.19804	0.245521	0.677032	1.63075	0.275784	0.564331	-0.290457	0.858007	1
circDDX50_3	chr14	78015573	78020135	+	4	ENSSSCT00000011216.2	DDX50	4,5,6,7	chr14:78014936-78015573|chr14:78020135-78026223	1	2	2	2	2	9	4	1	0	1	2	2	286.316	635.982	302.256	240.703	233.274	1053.64	309.821	121.365	0	284.243	581.441	484.524	-0.380284	0.685078	0.942654	1.15217	0.270112	0.685027	0.172007	0.854751	0.990365	-1.36045	0.192371	0.606976
circDDX50_4	chr14	78015573	78026373	+	5	ENSSSCT00000011216.2	DDX50	4,5,6,7,8	chr14:78014936-78015573|chr14:78026373-78034831	0	0	0	0	3	0	2	1	1	0	0	0	0	0	0	0	349.911	0	154.911	121.365	132.894	0	0	0	-2.83392	0.163565	0.622196	-3.03342	0.1363	0.596445	2.83392	0.189018	0.515951	3.03342	0.159581	0.597002
circDDX52	chr12	40728148	40733832	-	6	ENSSSCT00000024730.1	DDX52	8,7,6,5,4,3	chr12:40725002-40728148|chr12:40733832-40738080	0	0	0	0	3	0	0	0	0	0	0	0	0	0	0	0	349.911	0	0	0	0	0	0	0	-2.83002	0.255536	0.651868	0	1	1	2.83002	0.276105	0.564331	0	1	1
circDDX54	chr14	41118203	41119157	-	3	ENSSSCT00000010825.2	DDX54	5,4,3	chr14:41118188-41118203|chr14:41119157-41120618	0	0	0	0	0	0	4	0	3	0	0	0	0	0	0	0	0	0	309.821	0	398.682	0	0	0	0	1	1	-3.7419	0.130799	0.589078	0	1	1	3.7419	0.14621	0.578381
circDDX6	chr9	51073472	51079497	-	5	ENSSSCT00000016463.2	DDX6	10,9,8,7,6	chr9:51070883-51073472|chr9:51079497-51080941	1	0	5	0	1	2	10	0	2	0	1	2	286.316	0	755.639	0	116.637	234.142	774.553	0	265.788	0	290.72	484.524	1.59488	0.205788	0.650936	0.09937	0.92973	1	-1.05848	0.437632	0.68131	0.437028	0.724152	0.928267
circDEK	chr7	14663496	14671601	-	5	ENSSSCT00000001170.2	DEK	7,6,5,4,3	chr7:14649763-14663496|chr7:14671601-14676234	1	1	6	20	11	11	16	13	11	0	0	1	286.316	317.991	906.767	2407.03	1283.01	1287.78	1239.28	1577.75	1461.83	0	0	242.262	-1.4765	0.0165498	0.368194	-1.25043	0.0447902	0.437012	3.94196	2.65628e-05	0.00523757	3.71589	0.000103261	0.0257678
circDENND4A	chr1	181349906	181353955	-	4	ENSSSCT00000005449.2	DENND4A	21,20,19,18	chr1:181349036-181349906|chr1:181353955-181354538	0	0	1	0	0	1	3	0	0	0	0	0	0	0	151.128	0	0	117.071	232.366	0	0	0	0	0	0.435273	0.841776	0.996861	-0.363718	0.882775	1	1.60683	0.459033	0.689853	2.40582	0.325008	0.672453
circDENND4C	chr1	227165197	227186649	-	5	ENSSSCT00000005700.2	DENND4C	12,11,10,9,8	chr1:227159527-227165197|chr1:227186649-227188422	0	0	0	3	3	5	6	2	3	0	0	2	0	0	0	361.054	349.911	585.355	464.732	242.731	398.682	0	0	484.524	-4.56176	0.00379215	0.282473	-4.37996	0.00599817	0.200179	1.18813	0.240744	0.559503	1.00633	0.324048	0.672159
circDENND4C_2	chr1	227181486	227186649	-	3	ENSSSCT00000005700.2	DENND4C	10,9,8	chr1:227166326-227181486|chr1:227186649-227188422	1	2	8	7	7	10	11	8	9	1	4	3	286.316	635.982	1209.02	842.459	816.46	1170.71	852.008	970.923	1196.05	284.243	1162.88	726.785	-0.226419	0.704283	0.944465	-0.29204	0.618674	0.899389	0.377446	0.554954	0.765517	0.443067	0.481783	0.750176
circDENND4C_3	chr1	227181486	227197323	-	8	ENSSSCT00000005700.2	DENND4C	10,9,8,7,6,5,4,3	chr1:227166326-227181486|chr1:227197323-227210489	4	2	3	3	5	4	5	4	2	0	0	0	1145.27	635.982	453.383	361.054	583.186	468.284	387.276	485.461	265.788	0	0	0	0.535435	0.438781	0.766305	0.82335	0.241424	0.674014	4.68193	0.00431421	0.147513	4.39402	0.0091728	0.274716
circDENND4C_4	chr1	227185987	227188489	-	3	ENSSSCT00000005700.2	DENND4C	9,8,7	chr1:227181662-227185987|chr1:227188489-227189498	0	3	0	1	1	0	2	0	0	0	0	0	0	953.973	0	120.351	116.637	0	154.911	0	0	0	0	0	1.68386	0.392271	0.74499	2.02937	0.300875	0.702321	2.35751	0.295273	0.579143	2.012	0.34606	0.677961
circDENND6A_10	chr13	43417777	43426130	-	6	ENSSSCT00000012549.2	DENND6A	11,10,9,8,7,6	chr13:43410124-43417777|chr13:43426130-43431187	0	0	3	0	0	0	0	0	0	0	0	0	0	0	453.383	0	0	0	0	0	0	0	0	0	3.27975	0.13076	0.602346	3.27975	0.122283	0.58012	0	1	1	0	1	1
circDENND6A_11	chr13	43420848	43423452	-	3	ENSSSCT00000012549.2	DENND6A	9,8,7	chr13:43419245-43420848|chr13:43423452-43426017	0	0	0	0	5	0	3	0	1	0	0	0	0	0	0	0	583.186	0	232.366	0	132.894	0	0	0	-3.4834	0.149104	0.620674	-2.9123	0.207287	0.65421	3.4834	0.166554	0.508066	2.9123	0.229114	0.62394
circDENND6A_12	chr13	43420848	43426130	-	4	ENSSSCT00000012549.2	DENND6A	9,8,7,6	chr13:43419245-43420848|chr13:43426130-43431187	3	4	11	9	9	6	24	8	8	2	5	2	858.949	1271.96	1662.41	1083.16	1049.73	702.427	1858.93	970.923	1063.15	568.485	1453.6	484.524	0.477622	0.398512	0.747099	-0.0190584	0.971628	1	0.204626	0.751148	0.91384	0.701306	0.251501	0.647009
circDENND6A_8	chr13	43394659	43410124	-	5	ENSSSCT00000012549.2	DENND6A	16,15,14,13,12	chr13:43393963-43394659|chr13:43410124-43417777	0	0	1	0	2	0	0	0	0	0	0	0	0	0	151.128	0	233.274	0	0	0	0	0	0	0	-0.302111	0.908409	1	2.04172	0.255482	0.678587	2.34384	0.339073	0.616461	0	1	1
circDENND6A_9	chr13	43406480	43423452	-	8	ENSSSCT00000012549.2	DENND6A	14,13,12,11,10,9,8,7	chr13:43394888-43406480|chr13:43423452-43426017	0	0	0	0	0	2	0	0	0	0	1	0	0	0	0	0	0	234.142	0	0	0	0	290.72	0	-2.3473	0.310992	0.70365	0	1	1	-0.223617	0.928429	1	-2.57091	0.197798	0.608094
circDEPDC5	chr14	51737785	51748514	+	3	ENSSSCT00000010991.2	DEPDC5	23,24,25	chr14:51735710-51737785|chr14:51748514-51751564	0	0	0	0	2	0	0	0	2	0	0	0	0	0	0	0	233.274	0	0	0	265.788	0	0	0	-2.34423	0.303054	0.697211	-2.43924	0.292238	0.698704	2.34423	0.32734	0.611452	2.43924	0.316054	0.667978
circDEPTOR	chr4	20042956	20045839	-	2	ENSSSCT00000034055.1	DEPTOR	5,4	chr4:19994297-20042956|chr4:20045839-20050101	0	0	0	0	0	0	0	2	0	0	0	0	0	0	0	0	0	0	0	242.731	0	0	0	0	0	1	1	-2.36545	0.328189	0.717138	0	1	1	2.36545	0.350367	0.680879
circDEPTOR_2	chr4	20042956	20052708	-	4	ENSSSCT00000034055.1	DEPTOR	5,4,3,2	chr4:19994297-20042956|chr4:20052708-20085496	0	0	2	1	0	0	12	12	1	0	0	0	0	0	302.256	120.351	0	0	929.463	1456.38	132.894	0	0	0	1.39112	0.360998	0.736498	-2.49118	0.0507781	0.443552	1.61658	0.406142	0.669209	5.49888	0.00339053	0.192413
circDEPTOR_3	chr4	20042956	20085675	-	5	ENSSSCT00000036252.1	DEPTOR	6,5,4,3,2	chr4:20007036-20042956|chr4:20085675-20171302	0	0	1	0	0	0	4	0	1	0	0	1	0	0	151.128	0	0	0	309.821	0	132.894	0	0	242.262	2.1734	0.187025	0.646833	-1.0205	0.548342	0.853162	-2.47434	0.154677	0.499612	0.71956	0.673332	0.894574
circDERA	chr5	59928307	59952213	-	5	ENSSSCT00000000644.2	DERA	6,5,4,3,2	chr5:59885056-59928307|chr5:59952213-59953238	0	1	0	6	3	2	1	4	3	0	1	0	0	317.991	0	722.108	349.911	234.142	77.4553	485.461	398.682	0	290.72	0	-2.20687	0.0828596	0.554362	-1.70152	0.196706	0.643371	2.04171	0.114382	0.455896	1.53636	0.252762	0.647009
circDERL1	chr4	17240786	17247200	-	5	ENSSSCT00000027275.2	DERL1	6,5,4,3,2	chr4:17237051-17240786|chr4:17247200-17252225	0	0	3	0	1	1	0	0	0	0	0	0	0	0	453.383	0	116.637	117.071	0	0	0	0	0	0	0.956745	0.654696	0.925967	3.30287	0.0996038	0.555527	2.34613	0.318734	0.603272	0	1	1
circDHRS1	chr7	80266701	80267078	+	2	ENSSSCT00000002229.2	DHRS1	3,4	chr7:80263885-80266701|chr7:80267078-80270929	0	0	2	5	7	4	2	4	3	0	0	3	0	0	302.256	601.756	816.46	468.284	154.911	485.461	398.682	0	0	726.785	-1.98867	0.0499129	0.486515	-1.08507	0.321191	0.712972	1.18641	0.210551	0.541331	0.282808	0.783243	0.964877
circDHRS7C	chr12	57409183	57413527	-	3	ENSSSCT00000019585.2	DHRS7C	4,3,2	chr12:57407016-57409183|chr12:57413527-57419068	0	0	4	4	6	4	4	5	1	1	0	0	0	0	604.511	481.405	699.823	468.284	309.821	606.827	132.894	284.243	0	0	-0.931493	0.305534	0.699078	-0.306134	0.749469	0.965406	2.37598	0.0464225	0.345713	1.75062	0.162634	0.599579
circDHX16	chr7	26926481	26926985	-	2	ENSSSCT00000001498.3	DHX16	4,3	chr7:26922136-26926481|chr7:26926985-26927610	1	1	0	0	1	2	0	0	2	0	0	0	286.316	317.991	0	0	116.637	234.142	0	0	265.788	0	0	0	0.535417	0.751999	0.955813	0.9965	0.55487	0.856326	2.8354	0.192977	0.521239	2.37432	0.270172	0.651471
circDHX36	chr13	102343368	102345263	-	3	ENSSSCT00000027576.1	DHX36	9,8,7	chr13:102339237-102343368|chr13:102345263-102346238	0	0	0	0	5	0	3	0	0	0	0	0	0	0	0	0	583.186	0	232.366	0	0	0	0	0	-3.48213	0.234912	0.651868	-2.38507	0.345081	0.732063	3.48213	0.250311	0.564331	2.38507	0.365495	0.693344
circDHX36_2	chr13	102346238	102348459	-	2	ENSSSCT00000027576.1	DHX36	6,5	chr13:102345263-102346238|chr13:102348459-102350601	0	0	4	6	2	3	1	4	2	0	2	1	0	0	604.511	722.108	233.274	351.213	77.4553	485.461	265.788	0	581.441	242.262	-0.657927	0.528846	0.834994	0.0372846	0.964949	1	0.64086	0.556893	0.767876	-0.0543514	0.96002	1
circDHX36_3	chr13	102350601	102352650	-	3	ENSSSCT00000027576.1	DHX36	4,3,2	chr13:102348459-102350601|chr13:102352650-102395850	1	0	1	2	2	1	4	5	0	0	0	1	286.316	0	151.128	240.703	233.274	117.071	309.821	606.827	0	0	0	242.262	-0.350675	0.779641	0.967856	-0.960065	0.418391	0.781743	0.998066	0.484895	0.70173	1.60746	0.234944	0.633064
circDHX36_4	chr13	102377697	102378830	-	3	ENSSSCT00000023601.1	DHX36	27,26,25	chr13:102373928-102377697|chr13:102378830-102385989	2	0	6	8	8	12	16	3	1	2	2	6	572.633	0	906.767	962.81	933.097	1404.85	1239.28	364.096	132.894	568.485	581.441	1453.57	-0.941824	0.218353	0.651868	-0.151653	0.847461	1	0.304276	0.679809	0.863152	-0.485895	0.524222	0.774081
circDHX8	chr12	19868683	19869889	+	3	ENSSSCT00000018917.2	DHX8	7,8,9	chr12:19868006-19868683|chr12:19869889-19872118	2	1	2	2	2	1	2	0	0	0	1	0	572.633	317.991	302.256	240.703	233.274	117.071	154.911	0	0	0	290.72	0	0.895259	0.352446	0.730496	2.21182	0.0422075	0.437012	0.97621	0.466312	0.690912	-0.340349	0.823555	0.984756
circDIAPH2	chrX	85916080	85935529	+	5	ENSSSCT00000013641.2	DIAPH2	2,3,4,5,6	chrX:85891232-85916080|chrX:85935529-85941400	0	0	2	3	0	0	1	1	0	0	0	0	0	0	302.256	361.054	0	0	77.4553	121.365	0	0	0	0	0.0150496	0.986188	1	0.69267	0.705335	0.944579	2.85954	0.216416	0.541331	2.18192	0.318524	0.6684
circDIAPH2_2	chrX	85954040	85961011	+	3	ENSSSCT00000013641.2	DIAPH2	11,12,13	chrX:85949925-85954040|chrX:85961011-86132407	0	2	2	3	4	2	2	0	0	0	1	0	0	635.982	302.256	361.054	466.549	234.142	154.911	0	0	0	290.72	0	-0.209356	0.830929	0.994946	1.91279	0.104257	0.561694	1.76299	0.169539	0.508992	-0.359155	0.818275	0.984756
circDICER1	chr7	123595380	123621989	-	17	ENSSSCT00000022914.1	DICER1	19,18,17,16,15,14,13,12,11,10,9,8,7,6,5,4,3	chr7:123594179-123595380|chr7:123621989-123623450	0	0	2	0	0	0	0	0	1	0	0	0	0	0	302.256	0	0	0	0	0	132.894	0	0	0	2.79883	0.173602	0.631142	1.13221	0.619394	0.89996	0	1	1	1.66662	0.45146	0.734227
circDICER1_2	chr7	123605414	123607974	-	3	ENSSSCT00000022914.1	DICER1	10,9,8	chr7:123602991-123605414|chr7:123607974-123615109	0	0	1	0	0	0	2	0	0	0	0	0	0	0	151.128	0	0	0	154.911	0	0	0	0	0	2.03501	0.2753	0.668445	0.0712249	0.972596	1	0	1	1	1.96379	0.395222	0.720629
circDICER1_3	chr7	123615109	123623613	-	6	ENSSSCT00000022914.1	DICER1	7,6,5,4,3,2	chr7:123607974-123615109|chr7:123623613-123624247	3	1	2	6	12	10	15	2	7	6	4	0	858.949	317.991	302.256	722.108	1399.65	1170.71	1161.83	242.731	930.259	1705.46	1162.88	0	-1.20105	0.133132	0.602346	-0.749577	0.356314	0.741842	0.243411	0.74017	0.904502	-0.208067	0.781772	0.964211
circDICER1_4	chr7	123620806	123621989	-	2	ENSSSCT00000022914.1	DICER1	4,3	chr7:123620091-123620806|chr7:123621989-123623450	3	1	2	3	3	3	11	1	2	0	1	0	858.949	317.991	302.256	361.054	349.911	351.213	852.008	121.365	265.788	0	290.72	0	0.387673	0.676701	0.935382	0.0677737	0.942396	1	1.76282	0.172067	0.508992	2.08272	0.0933248	0.537871
circDIP2B	chr5	17111692	17125911	+	8	ENSSSCT00000028346.1	DIP2B	5,6,7,8,9,10,11,12	chr5:17108192-17111692|chr5:17125911-17127609	0	0	0	0	0	1	4	0	0	0	0	0	0	0	0	0	0	117.071	309.821	0	0	0	0	0	-1.60595	0.471176	0.78969	-2.71429	0.325794	0.715292	1.60595	0.492766	0.707691	2.71429	0.343811	0.676355
circDIP2B_2	chr5	17121475	17125911	+	3	ENSSSCT00000028346.1	DIP2B	10,11,12	chr5:17119836-17121475|chr5:17125911-17127609	0	0	1	2	0	0	0	2	0	0	0	0	0	0	151.128	240.703	0	0	0	242.731	0	0	0	0	-0.347861	0.89958	1	-0.340196	0.9031	1	2.37303	0.348458	0.619789	2.36537	0.350026	0.680879
circDISC1	chr14	63365859	63370343	-	2	ENSSSCT00000011136.2	DISC1	5,4	chr14:63342789-63365859|chr14:63370343-63386048	1	0	3	2	3	2	5	1	3	0	0	0	286.316	0	453.383	240.703	349.911	234.142	387.276	121.365	398.682	0	0	0	0.0817997	0.929471	1	-0.0781503	0.933517	1	3.94412	0.0302845	0.303514	4.10407	0.0211611	0.377298
circDLD	chr9	118423384	118433337	+	5	ENSSSCT00000016824.2	DLD	5,6,7,8,9	chr9:118422610-118423384|chr9:118433337-118434270	0	1	0	7	1	5	0	1	0	0	0	0	0	317.991	0	842.459	116.637	585.355	0	121.365	0	0	0	0	-2.38866	0.101724	0.581337	0.868513	0.608552	0.893966	4.80096	0.0144366	0.22716	1.54378	0.423996	0.729046
circDLG1	chr13	142624886	142629113	+	4	ENSSSCT00000012945.2	DLG1	20,21,22,23	chr13:142617932-142624886|chr13:142629113-142629517	0	0	0	0	1	2	0	0	0	3	0	1	0	0	0	0	116.637	234.142	0	0	0	852.728	0	242.262	-2.83511	0.1728	0.630278	0	1	1	-1.48841	0.360208	0.626905	-4.32352	0.01583	0.341731
circDLGAP5	chr1	205002127	205003641	-	2	ENSSSCT00000005573.2	DLGAP5	12,11	chr1:204995712-205002127|chr1:205003641-205006062	0	0	1	0	2	0	3	0	0	0	0	0	0	0	151.128	0	233.274	0	232.366	0	0	0	0	0	-0.31883	0.908188	1	-0.372075	0.887163	1	2.34345	0.352557	0.619789	2.3967	0.340842	0.674952
circDMD	chrX	29457521	29461618	-	3	ENSSSCT00000013350.3	DMD	13,12,11	chrX:29437159-29457521|chrX:29461618-29466220	0	0	3	5	1	3	0	7	2	0	0	1	0	0	453.383	601.756	116.637	351.213	0	849.557	265.788	0	0	242.262	-0.827605	0.538545	0.841484	-0.838829	0.534332	0.841673	1.80932	0.242926	0.561409	1.82055	0.240798	0.636557
circDMD_2	chrX	29493889	29498780	-	3	ENSSSCT00000013350.3	DMD	6,5,4	chrX:29471702-29493889|chrX:29498780-29514288	0	0	2	0	0	0	0	1	1	0	1	0	0	0	302.256	0	0	0	0	121.365	132.894	0	290.72	0	2.88639	0.108741	0.581337	0.516623	0.766633	0.973941	-2.55425	0.164695	0.505339	-0.184476	0.922429	1
circDMD_3	chrX	29493889	29514363	-	4	ENSSSCT00000013350.3	DMD	6,5,4,3	chrX:29471702-29493889|chrX:29514363-29549298	0	0	1	2	0	2	1	0	0	0	0	0	0	0	151.128	240.703	0	234.142	77.4553	0	0	0	0	0	-1.04267	0.552014	0.851519	0.770007	0.659787	0.922656	3.21093	0.142496	0.493438	1.39825	0.454204	0.734227
circDMD_4	chrX	31329224	31397020	-	8	ENSSSCT00000026041.2	DMD	17,16,15,14,13,12,11,10	chrX:31304923-31329224|chrX:31397020-31453579	0	0	0	0	1	3	0	1	0	0	0	0	0	0	0	0	116.637	351.213	0	121.365	0	0	0	0	-3.19702	0.164236	0.622196	-1.58973	0.413509	0.778361	3.19702	0.184358	0.50983	1.58973	0.442263	0.731464
circDMD_5	chrX	31369024	31397020	-	4	ENSSSCT00000026041.2	DMD	13,12,11,10	chrX:31350558-31369024|chrX:31397020-31453579	0	1	0	2	0	0	3	1	0	0	0	1	0	317.991	0	240.703	0	0	232.366	121.365	0	0	0	242.262	0.104387	0.962379	1	-0.447938	0.786663	0.983549	-0.105829	0.950179	1	0.446496	0.797743	0.972894
circDMD_6	chrX	31453579	31455092	-	2	ENSSSCT00000026041.2	DMD	9,8	chrX:31397020-31453579|chrX:31455092-31558042	1	0	5	0	3	0	3	3	2	0	2	3	286.316	0	755.639	0	349.911	0	232.366	364.096	265.788	0	581.441	726.785	1.64044	0.144358	0.61611	0.492915	0.624793	0.900204	-1.76321	0.127254	0.468227	-0.615686	0.555472	0.798953
circDMD_7	chrX	31558042	31596601	-	5	ENSSSCT00000026041.2	DMD	7,6,5,4,3	chrX:31455092-31558042|chrX:31596601-31777580	0	0	6	0	3	0	18	4	4	0	2	2	0	0	906.767	0	349.911	0	1394.19	485.461	531.576	0	581.441	484.524	1.53586	0.198708	0.649073	-1.08649	0.296973	0.701987	-1.46635	0.245852	0.56329	1.15601	0.289576	0.653682
circDMXL1	chr2	128479852	128487157	+	3	ENSSSCT00000024571.1	DMXL1	29,30,31	chr2:128476673-128479852|chr2:128487157-128491385	0	1	2	4	3	7	3	1	3	2	1	1	0	317.991	302.256	481.405	349.911	819.498	232.366	121.365	398.682	568.485	290.72	242.262	-1.22848	0.164463	0.622196	-0.121089	0.903006	1	0.581148	0.48865	0.703891	-0.526243	0.572634	0.811958
circDMXL1_2	chr2	128486978	128502134	+	5	ENSSSCT00000024571.1	DMXL1	31,32,33,34,35	chr2:128480656-128486978|chr2:128502134-128505784	0	0	0	0	2	4	1	1	1	0	0	0	0	0	0	0	233.274	468.284	77.4553	121.365	132.894	0	0	0	-3.73102	0.0495653	0.486515	-2.72407	0.156216	0.612742	3.73102	0.0640121	0.383942	2.72407	0.184245	0.606621
circDMXL1_3	chr2	128486978	128524824	+	11	ENSSSCT00000024571.1	DMXL1	31,32,33,34,35,36,37,38,39,40,41	chr2:128480656-128486978|chr2:128524824-128528892	0	0	0	2	0	0	1	0	2	0	0	0	0	0	0	240.703	0	0	77.4553	0	265.788	0	0	0	-2.37021	0.276861	0.668445	-2.77762	0.219378	0.659311	2.37021	0.302828	0.587318	2.77762	0.242656	0.638994
circDMXL1_4	chr2	128486978	128530836	+	13	ENSSSCT00000024571.1	DMXL1	31,32,33,34,35,36,37,38,39,40,41,42,43	chr2:128480656-128486978|chr2:128530836-128536488	0	0	0	0	0	0	0	2	3	0	0	0	0	0	0	0	0	0	0	242.731	398.682	0	0	0	0	1	1	-3.58412	0.174127	0.62612	0	1	1	3.58412	0.190259	0.606976
circDNAJB7	chr18	1457167	1460242	-	3	ENSSSCT00000017865.2	DNAJB7	4,3,2	chr18:1455543-1457167|chr18:1460242-1463209	0	0	0	0	1	0	0	3	0	0	0	0	0	0	0	0	116.637	0	0	364.096	0	0	0	0	-1.60474	0.426157	0.762693	-2.85422	0.237732	0.674014	1.60474	0.452624	0.689204	2.85422	0.258982	0.647009
circDNAJC10	chr15	97716152	97716961	+	2	ENSSSCT00000017440.2	DNAJC10	2,3	chr15:97715731-97716152|chr15:97716961-97718457	0	0	1	1	1	3	9	5	1	0	6	2	0	0	151.128	120.351	116.637	351.213	697.097	606.827	132.894	0	1744.32	484.524	-1.25072	0.383199	0.742756	-2.49951	0.0573752	0.460983	-1.80338	0.0893724	0.427861	-0.554591	0.567981	0.809197
circDNAJC11	chr6	62370729	62371821	+	3	ENSSSCT00000003755.2	DNAJC11	3,4,5	chr6:62367455-62370729|chr6:62371821-62374941	0	0	0	2	0	0	3	3	1	0	0	0	0	0	0	240.703	0	0	232.366	364.096	132.894	0	0	0	-2.36125	0.215228	0.651868	-3.78188	0.0424945	0.437012	2.36125	0.246842	0.563686	3.78188	0.0559985	0.473818
circDNAJC13	chr13	81190633	81195086	+	4	ENSSSCT00000012725.2	DNAJC13	6,7,8,9	chr13:81187559-81190633|chr13:81195086-81199596	0	0	0	0	0	0	5	1	0	0	0	0	0	0	0	0	0	0	387.276	121.365	0	0	0	0	0	1	1	-3.33481	0.192375	0.640478	0	1	1	3.33481	0.210061	0.611265
circDNAJC13_2	chr13	81190633	81202807	+	9	ENSSSCT00000012725.2	DNAJC13	6,7,8,9,10,11,12,13,14	chr13:81187559-81190633|chr13:81202807-81204046	0	0	0	4	1	0	0	3	1	0	0	0	0	0	0	481.405	116.637	0	0	364.096	132.894	0	0	0	-3.50955	0.105567	0.581337	-3.22363	0.134411	0.595533	3.50955	0.123324	0.462678	3.22363	0.155169	0.590383
circDNAJC14	chr5	22747526	22747967	-	2	ENSSSCT00000000389.2	DNAJC14	4,3	chr5:22746917-22747526|chr5:22747967-22751416	2	2	3	17	11	13	23	7	2	2	4	6	572.633	635.982	453.383	2045.97	1283.01	1521.92	1781.47	849.557	265.788	568.485	1162.88	1453.57	-1.5582	0.0303039	0.457043	-0.905016	0.219508	0.659311	0.580768	0.376173	0.642678	-0.0724128	0.915071	1
circDNAJC16	chr6	69244119	69246608	-	2	ENSSSCT00000003850.2	DNAJC16	3,2	chr6:69234607-69244119|chr6:69246608-69250994	0	0	1	3	0	2	2	2	1	0	4	0	0	0	151.128	361.054	0	234.142	154.911	242.731	132.894	0	1162.88	0	-1.29236	0.406835	0.7526	-1.14083	0.464579	0.804374	-0.861583	0.510873	0.721638	-1.01311	0.439341	0.730073
circDNAJC7	chr12	21029530	21038230	+	6	ENSSSCT00000018963.2	DNAJC7	3,4,5,6,7,8	chr12:21028784-21029530|chr12:21038230-21039323	0	0	0	0	0	1	2	0	0	1	0	0	0	0	0	0	0	117.071	154.911	0	0	284.243	0	0	-1.60708	0.42602	0.762693	-1.97651	0.353654	0.738596	-0.945632	0.686211	0.867992	-0.576196	0.810101	0.979883
circDOCK4	chr18	36505708	36515630	+	4	ENSSSCT00000029218.1	ENSSSCG00000025602.1	9,10,11,12	chr18:36480633-36505708|chr18:36515630-36535287	0	0	4	5	8	6	21	9	13	2	2	5	0	0	604.511	601.756	933.097	702.427	1626.56	1092.29	1727.62	568.485	581.441	1211.31	-1.3012	0.091719	0.567237	-2.27877	0.00100959	0.0676827	-0.109425	0.866286	0.998552	0.868148	0.139836	0.577923
circDOCK4_2	chr18	36472458	36506655	+	4	ENSSSCT00000029218.1	ENSSSCG00000025602.1	7,8,9,10	chr18:36467886-36472458|chr18:36506655-36511452	0	0	0	0	0	0	2	0	0	0	2	0	0	0	0	0	0	0	154.911	0	0	0	581.441	0	0	1	1	-1.98172	0.347422	0.732063	-3.45272	0.108515	0.451689	-1.471	0.517605	0.774081
circDOCK4_3	chr18	36480481	36515630	+	5	ENSSSCT00000029218.1	ENSSSCG00000025602.1	8,9,10,11,12	chr18:36472543-36480481|chr18:36515630-36535287	0	0	0	0	0	0	0	2	3	0	0	0	0	0	0	0	0	0	0	242.731	398.682	0	0	0	0	1	1	-3.58422	0.174572	0.62612	0	1	1	3.58422	0.190694	0.606976
circDOCK4_4	chr18	36505708	36535413	+	5	ENSSSCT00000029218.1	ENSSSCG00000025602.1	9,10,11,12,13	chr18:36480633-36505708|chr18:36535413-36545402	0	0	1	1	1	1	3	2	0	0	0	0	0	0	151.128	120.351	116.637	117.071	232.366	242.731	0	0	0	0	-0.570055	0.690166	0.942654	-1.03342	0.440756	0.787184	2.8421	0.150834	0.498604	3.30547	0.085078	0.528114
circDOCK9	chr11	75001212	75016218	-	6	ENSSSCT00000027258.1	DOCK9	51,50,49,48,47,46	chr11:74999056-75001212|chr11:75016218-75017380	0	0	0	1	1	1	1	0	0	0	0	0	0	0	0	120.351	116.637	117.071	77.4553	0	0	0	0	0	-2.84225	0.242364	0.651868	-1.32634	0.472041	0.804873	2.84225	0.263475	0.564331	1.32634	0.498583	0.764058
circDOCK9_2	chr11	75032497	75061013	-	10	ENSSSCT00000027258.1	DOCK9	43,42,41,40,39,38,37,36,35,34	chr11:75030028-75032497|chr11:75061013-75063238	0	0	0	0	0	3	2	5	2	0	2	3	0	0	0	0	0	351.213	154.911	606.827	265.788	0	581.441	726.785	-2.83805	0.1422	0.613453	-4.20812	0.0249813	0.370519	-1.7572	0.168423	0.508992	-0.387126	0.739961	0.938585
circDOCK9_3	chr11	75129057	75132336	-	3	ENSSSCT00000027258.1	DOCK9	6,5,4	chr11:75121939-75129057|chr11:75132336-75134524	0	0	2	6	3	0	0	1	0	0	0	2	0	0	302.256	722.108	349.911	0	0	121.365	0	0	0	484.524	-1.35251	0.386235	0.743273	1.38174	0.397487	0.768396	0.97742	0.530692	0.742803	-1.75683	0.296494	0.656761
circDPP8	chr1	181050308	181059423	-	6	ENSSSCT00000005445.2	DPP8	11,10,9,8,7,6	chr1:181046448-181050308|chr1:181059423-181066518	0	0	0	0	1	3	1	0	2	0	0	1	0	0	0	0	116.637	351.213	77.4553	0	265.788	0	0	242.262	-3.1993	0.111557	0.591677	-2.75209	0.167719	0.623966	0.719708	0.66704	0.854474	0.272497	0.875842	1
circDPP8_2	chr1	181051818	181055410	-	3	ENSSSCT00000005445.2	DPP8	10,9,8	chr1:181050468-181051818|chr1:181055410-181057329	3	0	6	6	5	7	13	4	1	0	0	1	858.949	0	906.767	722.108	583.186	819.498	1006.92	485.461	132.894	0	0	242.262	-0.130038	0.867432	1	0.148433	0.848235	1	2.7434	0.0178822	0.241698	2.46493	0.0357498	0.440027
circDPP8_3	chr1	181051818	181059423	-	5	ENSSSCT00000005445.2	DPP8	10,9,8,7,6	chr1:181050468-181051818|chr1:181059423-181066518	1	0	1	2	1	1	3	1	0	0	0	0	286.316	0	151.128	240.703	116.637	117.071	232.366	121.365	0	0	0	0	-0.0581753	0.961652	1	0.141389	0.908815	1	3.2073	0.0982397	0.439066	3.00773	0.120581	0.572872
circDPYSL2	chr14	11695239	11696461	+	2	ENSSSCT00000031898.1	DPYSL2	9,10	chr14:11685949-11695239|chr14:11696461-11700110	0	0	2	3	4	0	0	0	1	0	0	0	0	0	302.256	361.054	466.549	0	0	0	132.894	0	0	0	-1.01627	0.5328	0.838079	1.33067	0.423908	0.783364	3.94665	0.074157	0.394562	1.59971	0.425192	0.729046
circDRG1	chr14	51295876	51305187	+	5	ENSSSCT00000010986.2	DRG1	5,6,7,8,9	chr14:51290568-51295876|chr14:51305187-51313504	1	0	0	4	3	2	1	2	0	0	0	0	286.316	0	0	481.405	349.911	234.142	77.4553	242.731	0	0	0	0	-1.95104	0.117064	0.599738	-0.365326	0.79458	0.988166	4.28802	0.017171	0.236861	2.7023	0.170641	0.601796
circDST	chr7	33639449	33645741	+	5	ENSSSCT00000001671.2	DST	48,49,50,51,52	chr7:33636258-33639449|chr7:33645741-33647798	0	0	2	1	1	0	3	1	0	0	0	0	0	0	302.256	120.351	116.637	0	232.366	121.365	0	0	0	0	0.632715	0.667151	0.933491	0.0452253	0.971182	1	2.35621	0.255379	0.564331	2.9437	0.154792	0.590383
circDST	chr7	33583168	33586587	+	4	ENSSSCT00000001671.2	DST	26,27,28,29	chr7:33582076-33583168|chr7:33586587-33587445	1	0	1	1	3	3	4	3	0	0	1	1	286.316	0	151.128	120.351	349.911	351.213	309.821	364.096	0	0	290.72	242.262	-0.79344	0.483234	0.798131	-0.598209	0.597329	0.886819	0.561778	0.623903	0.82368	0.366547	0.74898	0.945926
circDTL	chr9	144311824	144316052	-	4	ENSSSCT00000016993.2	DTL	5,4,3,2	chr9:144304713-144311824|chr9:144316052-144322860	0	0	0	1	2	7	0	3	0	0	2	0	0	0	0	120.351	233.274	819.498	0	364.096	0	0	581.441	0	-4.42438	0.0337588	0.45914	-2.81902	0.169118	0.625008	0.994857	0.527523	0.739547	-0.610501	0.708557	0.917021
circDTNBP1	chr7	12247872	12271827	-	3	ENSSSCT00000001157.2	DTNBP1	7,6,5	chr7:12202659-12247872|chr7:12271827-12277107	1	1	2	1	2	0	0	2	0	0	0	3	286.316	317.991	302.256	120.351	233.274	0	0	242.731	0	0	0	726.785	1.22785	0.35495	0.733491	1.77707	0.192777	0.640478	-1.01994	0.455765	0.689477	-1.56916	0.263857	0.649098
circDZIP3	chr13	159976237	159983106	-	5	ENSSSCT00000013065.2	DZIP3	10,9,8,7,6	chr13:159964859-159976237|chr13:159983106-160002101	0	0	0	4	2	1	1	0	0	0	0	0	0	0	0	481.405	233.274	117.071	77.4553	0	0	0	0	0	-3.94967	0.0319292	0.45914	-1.44717	0.40061	0.770421	3.94967	0.0431863	0.337211	1.44717	0.434466	0.729046
circDZIP3_2	chr13	160002101	160007391	-	4	ENSSSCT00000013065.2	DZIP3	5,4,3,2	chr13:159983106-160002101|chr13:160007391-160016800	0	0	0	1	2	0	0	0	0	0	0	0	0	0	0	120.351	233.274	0	0	0	0	0	0	0	-2.84098	0.254124	0.651868	0	1	1	2.84098	0.274644	0.564331	0	1	1
circE2F3	chr7	16766072	16767654	+	2	ENSSSCT00000001174.2	E2F3	2,3	chr7:16765960-16766072|chr7:16767654-16769532	0	0	3	0	0	0	3	0	0	0	0	1	0	0	453.383	0	0	0	232.366	0	0	0	0	242.262	3.29168	0.118206	0.599738	0.876212	0.693308	0.941819	-2.43873	0.212889	0.541331	-0.0232632	0.994136	1
circE2F6	chr3	134023450	134080373	+	4	ENSSSCT00000028641.1	E2F6	3,4,5,6	chr3:134020034-134023450|chr3:134080373-134081404	0	0	1	0	0	4	2	2	0	0	0	0	0	0	151.128	0	0	468.284	154.911	242.731	0	0	0	0	-1.06343	0.577235	0.869615	-0.872586	0.646209	0.912807	3.19862	0.161845	0.505226	3.00778	0.18375	0.606245
circEAPP	chr7	70033346	70041544	+	4	ENSSSCT00000002193.2	EAPP	2,3,4,5	chr7:70028113-70033346|chr7:70041544-70050363	0	0	1	0	3	0	1	1	0	0	0	0	0	0	151.128	0	349.911	0	77.4553	121.365	0	0	0	0	-0.70904	0.721858	0.949643	-0.0597229	0.983962	1	2.83209	0.216072	0.541331	2.18277	0.315551	0.667911
circEARS2	chr10	92170	107547	+	6	ENSSSCT00000011813.2	EARS2	2,3,4,5,6,7	chr10:86603-92170|chr10:107547-112960	0	0	0	0	0	3	0	1	0	0	0	0	0	0	0	0	0	351.213	0	121.365	0	0	0	0	-2.83412	0.240024	0.651868	-1.60298	0.42927	0.783793	2.83412	0.261353	0.564331	1.60298	0.455716	0.734227
circEBF3	chr14	150965602	150975351	-	4	ENSSSCT00000011769.2	EBF3	11,10,9,8	chr14:150948261-150965602|chr14:150975351-151044793	0	0	7	2	0	3	2	1	0	0	0	0	0	0	1057.89	240.703	0	351.213	154.911	121.365	0	0	0	0	0.957409	0.515992	0.826208	1.85227	0.223082	0.66379	3.49922	0.112274	0.451689	2.60435	0.224654	0.620781
circEBF3_2	chr14	150966214	150975351	-	3	ENSSSCT00000011769.2	EBF3	10,9,8	chr14:150965729-150966214|chr14:150975351-151044793	0	0	0	3	1	1	0	0	0	0	0	0	0	0	0	361.054	116.637	117.071	0	0	0	0	0	0	-3.50328	0.0873539	0.562327	0	1	1	3.50328	0.10519	0.450423	0	1	1
circECD	chr14	82059920	82064265	+	4	ENSSSCT00000011268.2	ECD	3,4,5,6	chr14:82049732-82059920|chr14:82064265-82065548	0	0	0	1	0	0	0	0	3	0	0	0	0	0	0	120.351	0	0	0	0	398.682	0	0	0	-1.62447	0.422007	0.762693	-2.94682	0.225538	0.66379	1.62447	0.448596	0.688338	2.94682	0.24632	0.639137
circECH1	chr6	43177208	43177632	-	2	ENSSSCT00000028591.1	ECH1	3,2	chr6:43168260-43177208|chr6:43177632-43178324	0	4	10	8	3	8	4	5	3	0	1	4	0	1271.96	1511.28	962.81	349.911	936.569	309.821	606.827	398.682	0	290.72	969.047	0.3939	0.58232	0.874132	1.17268	0.119846	0.579624	0.73255	0.386858	0.655916	-0.0462297	0.957307	1
circECSIT	chr2	70510998	70511871	-	2	ENSSSCT00000014870.2	ECSIT	4,3	chr2:70509481-70510998|chr2:70511871-70515909	0	0	0	0	0	0	2	0	0	0	0	0	0	0	0	0	0	0	154.911	0	0	0	0	0	0	1	1	-1.95433	0.385479	0.764073	0	1	1	1.95433	0.408842	0.729046
circEDC3	chr7	63538956	63542549	+	2	ENSSSCT00000002132.2	EDC3	2,3	chr7:63517455-63538956|chr7:63542549-63556777	0	0	0	0	0	2	8	0	0	1	0	0	0	0	0	0	0	234.142	619.642	0	0	284.243	0	0	-2.34763	0.296219	0.688442	-3.60904	0.148767	0.60548	-0.203615	0.930353	1	1.05779	0.647178	0.869476
circEDC3_2	chr7	63538956	63557113	+	3	ENSSSCT00000002132.2	EDC3	2,3,4	chr7:63517455-63538956|chr7:63557113-63575748	4	2	12	10	21	21	21	6	12	3	3	6	1145.27	635.982	1813.53	1203.51	2449.38	2458.49	1626.56	728.192	1594.73	852.728	872.161	1453.57	-0.650814	0.237706	0.651868	-0.0428688	0.940322	1	0.91206	0.120298	0.460419	0.304115	0.615488	0.843378
circEDC3_3	chr7	63556777	63557113	+	1	ENSSSCT00000002132.2	EDC3	4	chr7:63542549-63556777|chr7:63557113-63575748	0	0	8	6	5	9	8	7	16	0	2	1	0	0	1209.02	722.108	583.186	1053.64	619.642	849.557	2126.31	0	581.441	242.262	-0.569491	0.489	0.803889	-1.12905	0.157134	0.612742	1.47125	0.128437	0.470002	2.0308	0.0302121	0.433247
circEDEM3	chr9	138383628	138393642	-	5	ENSSSCT00000016956.2	EDEM3	12,11,10,9,8	chr9:138382345-138383628|chr9:138393642-138396814	0	0	1	0	2	0	4	0	0	0	0	0	0	0	151.128	0	233.274	0	309.821	0	0	0	0	0	-0.307013	0.908273	1	-0.69923	0.780769	0.981304	2.34372	0.342876	0.616461	2.73594	0.286603	0.653682
circEDEM3_2	chr9	138393536	138402083	-	3	ENSSSCT00000016956.2	EDEM3	8,7,6	chr9:138387322-138393536|chr9:138402083-138403221	0	0	2	0	0	0	2	3	0	0	0	0	0	0	302.256	0	0	0	154.911	364.096	0	0	0	0	2.85836	0.125114	0.602346	-0.474868	0.814411	0.997152	0	1	1	3.33322	0.166827	0.601796
circEDEM3_3	chr9	138393536	138403334	-	4	ENSSSCT00000016956.2	EDEM3	8,7,6,5	chr9:138387322-138393536|chr9:138403334-138408035	0	3	6	1	4	2	1	3	1	0	0	0	0	953.973	906.767	120.351	466.549	234.142	77.4553	364.096	132.894	0	0	0	1.17628	0.22823	0.651868	1.72089	0.0885939	0.536041	3.94082	0.0395806	0.33183	3.39622	0.0845234	0.526829
circEDRF1	chr14	146703125	146704738	+	2	ENSSSCT00000011753.2	EDRF1	22,23	chr14:146701074-146703125|chr14:146704738-146706402	3	0	4	0	10	5	10	2	5	0	4	5	858.949	0	604.511	0	1166.37	585.355	774.553	242.731	664.47	0	1162.88	1211.31	-0.192127	0.839793	0.996861	-0.152771	0.871321	1	-0.437928	0.632397	0.830072	-0.477284	0.600291	0.832509
circEEA1	chr5	94425845	94439340	+	7	ENSSSCT00000000996.2	EEA1	3,4,5,6,7,8,9	chr5:94418843-94425845|chr5:94439340-94445223	0	0	0	2	5	1	0	0	0	0	0	0	0	0	0	240.703	583.186	117.071	0	0	0	0	0	0	-4.12262	0.0317635	0.45914	0	1	1	4.12262	0.0417725	0.337211	0	1	1
circEEA1_2	chr5	94439223	94451370	+	3	ENSSSCT00000000996.2	EEA1	9,10,11	chr5:94431236-94439223|chr5:94451370-94452813	0	0	0	2	4	5	1	0	0	1	0	0	0	0	0	240.703	466.549	585.355	77.4553	0	0	284.243	0	0	-4.55963	0.00587528	0.312602	-1.47057	0.392053	0.765683	2.03901	0.101728	0.441699	-1.05006	0.513422	0.773597
circEEA1_3	chr5	94469232	94472814	+	3	ENSSSCT00000000996.2	EEA1	18,19,20	chr5:94465906-94469232|chr5:94472814-94478744	0	0	0	2	3	0	0	0	0	0	0	0	0	0	0	240.703	349.911	0	0	0	0	0	0	0	-3.49734	0.131677	0.602346	0	1	1	3.49734	0.149288	0.498604	0	1	1
circEEF2K	chr3	24388456	24388769	-	1	ENSSSCT00000008589.2	EEF2K	2	chr3:24365680-24388456|chr3:24388769-24412262	0	0	0	0	1	6	9	3	1	0	0	0	0	0	0	0	116.637	702.427	697.097	364.096	132.894	0	0	0	-3.93671	0.0498961	0.486515	-4.48359	0.0240233	0.36722	3.93671	0.0625427	0.383942	4.48359	0.0312612	0.437955
circEEF2K	chr3	24310936	24311423	-	2	ENSSSCT00000008589.2	EEF2K	15,14	chr3:24300394-24310936|chr3:24311423-24313203	0	0	0	2	0	5	3	2	0	0	0	0	0	0	0	240.703	0	585.355	232.366	242.731	0	0	0	0	-3.94474	0.0551351	0.498382	-3.25779	0.109609	0.562804	3.94474	0.0679791	0.391522	3.25779	0.130248	0.574282
circEEF2K_2	chr3	24310936	24314292	-	4	ENSSSCT00000008589.2	EEF2K	15,14,13,12	chr3:24300394-24310936|chr3:24314292-24318464	0	1	0	0	0	0	2	0	0	0	0	0	0	317.991	0	0	0	0	154.911	0	0	0	0	0	2.59773	0.214051	0.651868	0.630568	0.806809	0.993178	0	1	1	1.96716	0.390801	0.717396
circEEF2K_3	chr3	24310936	24365680	-	13	ENSSSCT00000008589.2	EEF2K	15,14,13,12,11,10,9,8,7,6,5,4,3	chr3:24300394-24310936|chr3:24365680-24388456	0	0	0	1	0	0	7	3	4	0	1	2	0	0	0	120.351	0	0	542.187	364.096	531.576	0	290.72	484.524	-1.61326	0.362723	0.737238	-4.71797	0.00261561	0.125375	-2.29984	0.0792444	0.40678	0.804867	0.38729	0.712511
circEEF2K_4	chr3	24318464	24321501	-	3	ENSSSCT00000008589.2	EEF2K	11,10,9	chr3:24314292-24318464|chr3:24321501-24322010	0	1	0	0	1	1	1	0	0	0	0	2	0	317.991	0	0	116.637	117.071	77.4553	0	0	0	0	484.524	0.116004	0.957492	1	1.06483	0.568437	0.865619	-0.968857	0.55874	0.769473	-1.91768	0.261267	0.648235
circEFR3B	chr3	120785637	120787826	-	3	ENSSSCT00000025548.1	EFR3B	14,13,12	chr3:120783604-120785637|chr3:120787826-120789895	0	0	0	0	0	3	0	0	0	0	0	0	0	0	0	0	0	351.213	0	0	0	0	0	0	-2.83389	0.255036	0.651868	0	1	1	2.83389	0.275588	0.564331	0	1	1
circEFTUD2	chr12	18731948	18736767	+	5	ENSSSCT00000018882.2	EFTUD2	4,5,6,7,8	chr12:18731278-18731948|chr12:18736767-18740364	0	0	3	2	5	2	5	0	0	0	0	0	0	0	453.383	240.703	583.186	234.142	387.276	0	0	0	0	0	-0.844994	0.558123	0.856214	0.33189	0.817227	0.998668	4.28236	0.0432867	0.337211	3.10548	0.14189	0.578381
circEFTUD2_2	chr12	18731948	18740531	+	6	ENSSSCT00000018882.2	EFTUD2	4,5,6,7,8,9	chr12:18731278-18731948|chr12:18740531-18742260	0	0	2	2	0	0	0	0	0	0	0	0	0	0	302.256	240.703	0	0	0	0	0	0	0	0	0.443274	0.837009	0.996861	2.81489	0.147591	0.605337	2.37162	0.321806	0.607372	0	1	1
circEHBP1	chr3	83018887	83024870	-	4	ENSSSCT00000009167.2	EHBP1	10,9,8,7	chr3:82982311-83018887|chr3:83024870-83038012	0	0	2	5	3	0	0	0	0	0	0	0	0	0	302.256	601.756	349.911	0	0	0	0	0	0	0	-1.22922	0.47956	0.795999	2.90536	0.0892836	0.536342	4.13457	0.0715612	0.393433	0	1	1
circEHBP1_2	chr3	83018887	83038160	-	5	ENSSSCT00000009167.2	EHBP1	10,9,8,7,6	chr3:82982311-83018887|chr3:83038160-83065622	0	0	0	6	5	7	2	2	3	0	2	1	0	0	0	722.108	583.186	819.498	154.911	242.731	398.682	0	581.441	242.262	-5.24893	0.000218849	0.122263	-3.79986	0.0231242	0.363907	1.32635	0.110664	0.451689	-0.122729	0.898858	1
circEIF2AK1	chr3	5155279	5158204	+	2	ENSSSCT00000008332.2	EIF2AK1	3,4	chr3:5153765-5155279|chr3:5158204-5164150	2	0	4	2	2	2	3	0	1	2	0	1	572.633	0	604.511	240.703	233.274	234.142	232.366	0	132.894	568.485	0	242.262	0.836165	0.364967	0.738695	1.56053	0.109837	0.562804	-0.183474	0.86284	0.997324	-0.907837	0.419489	0.729046
circEIF2AK1_2	chr3	5155279	5164265	+	3	ENSSSCT00000008332.2	EIF2AK1	3,4,5	chr3:5153765-5155279|chr3:5164265-5164976	2	0	1	1	1	0	4	2	0	0	0	3	572.633	0	151.128	120.351	116.637	0	309.821	242.731	0	0	0	726.785	1.37357	0.333214	0.711877	0.24709	0.852717	1	-1.50535	0.287608	0.574588	-0.378869	0.771418	0.958766
circEIF2B5	chr13	131374930	131375931	-	4	ENSSSCT00000012895.2	EIF2B5	5,4,3,2	chr13:131374376-131374930|chr13:131375931-131377032	0	0	2	2	2	1	1	0	0	0	0	2	0	0	302.256	240.703	233.274	117.071	77.4553	0	0	0	0	484.524	-0.450488	0.727738	0.949643	1.59398	0.271902	0.685813	0.146193	0.910802	1	-1.89828	0.199694	0.608094
circEIF3A	chr14	140504668	140506041	-	2	ENSSSCT00000011680.2	EIF3A	19,18	chr14:140502331-140504668|chr14:140506041-140510817	4	1	1	0	1	0	0	0	1	0	0	0	1145.27	317.991	151.128	0	116.637	0	0	0	132.894	0	0	0	3.19461	0.035577	0.45914	3.22437	0.0325447	0.407051	1.60859	0.412032	0.671392	1.57882	0.422411	0.729046
circEIF3A_2	chr14	140515704	140520043	-	5	ENSSSCT00000011680.2	EIF3A	12,11,10,9,8	chr14:140514751-140515704|chr14:140520043-140523230	1	1	0	0	0	0	0	0	2	0	0	0	286.316	317.991	0	0	0	0	0	0	265.788	0	0	0	3.44727	0.101515	0.581337	1.01617	0.644886	0.911708	0	1	1	2.43109	0.305849	0.662705
circEIF3E	chr4	31712186	31714845	+	3	ENSSSCT00000006622.2	EIF3E	8,9,10	chr4:31695965-31712186|chr4:31714845-31729180	1	0	5	0	0	0	2	0	0	0	0	0	286.316	0	755.639	0	0	0	154.911	0	0	0	0	0	4.33511	0.0345811	0.45914	2.327	0.232243	0.667648	0	1	1	2.00811	0.349192	0.680879
circEIF4A2	chr13	133976858	133977323	+	2	ENSSSCT00000012915.1	EIF4A2	8,9	chr13:133976549-133976858|chr13:133977323-133977545	0	0	5	0	0	1	6	1	1	0	0	0	0	0	755.639	0	0	117.071	464.732	121.365	132.894	0	0	0	2.45832	0.108256	0.581337	0.252098	0.84786	1	1.6096	0.412881	0.671472	3.81582	0.0700331	0.506723
circEIF4E3	chr13	58781353	58797708	-	5	ENSSSCT00000012603.2	EIF4E3	7,6,5,4,3	chr13:58776496-58781353|chr13:58797708-58816485	0	0	2	5	0	1	0	0	0	0	0	0	0	0	302.256	601.756	0	117.071	0	0	0	0	0	0	-0.893201	0.65302	0.925735	2.86157	0.112643	0.565237	3.75477	0.12445	0.464024	0	1	1
circELL2	chr2	106419585	106419952	-	2	ENSSSCT00000015477.2	ELL2	7,6	chr2:106416794-106419585|chr2:106419952-106423455	0	2	3	4	0	6	5	4	7	2	0	4	0	635.982	453.383	481.405	0	702.427	387.276	485.461	930.259	568.485	0	969.047	-0.0831753	0.932062	1	-0.631497	0.49797	0.812694	-0.412038	0.660259	0.850245	0.136284	0.881131	1
circELL2_2	chr2	106419585	106423715	-	3	ENSSSCT00000015477.2	ELL2	7,6,5	chr2:106416794-106419585|chr2:106423715-106430986	1	0	1	6	6	4	9	5	3	1	2	4	286.316	0	151.128	722.108	699.823	468.284	697.097	606.827	398.682	284.243	581.441	969.047	-1.933	0.0349314	0.45914	-1.83123	0.0456795	0.437012	0.00232827	0.997556	1	-0.0994383	0.887339	1
circELP2	chr6	112448403	112453978	+	3	ENSSSCT00000026023.1	ELP2	18,19,20	chr6:112442001-112448403|chr6:112453978-112454761	0	0	0	0	2	2	0	1	0	0	0	0	0	0	0	0	233.274	234.142	0	121.365	0	0	0	0	-3.1968	0.143402	0.61611	-1.57882	0.405153	0.771131	3.1968	0.164173	0.505339	1.57882	0.435314	0.729046
circEMC2	chr4	31387168	31396823	-	5	ENSSSCT00000006621.2	EMC2	10,9,8,7,6	chr4:31382451-31387168|chr4:31396823-31452928	0	2	2	14	15	10	45	20	13	7	0	2	0	635.982	302.256	1684.92	1749.56	1170.71	3485.49	2427.31	1727.62	1989.7	0	484.524	-2.26984	0.00435939	0.310908	-3.0117	8.06404e-05	0.0135153	0.894787	0.193941	0.522335	1.63665	0.0135684	0.321649
circEMC2	chr4	31452928	31463369	-	4	ENSSSCT00000006621.2	EMC2	5,4,3,2	chr4:31396823-31452928|chr4:31463369-31473461	5	2	18	20	39	13	45	22	15	14	9	9	1431.58	635.982	2720.3	2407.03	4548.85	1521.92	3485.49	2670.04	1993.41	3979.4	2616.48	2180.36	-0.701448	0.199573	0.649073	-0.659563	0.225864	0.66379	-0.0414892	0.93746	1	-0.0833746	0.87429	1
circEMC2_2	chr4	31387168	31463369	-	9	ENSSSCT00000006621.2	EMC2	10,9,8,7,6,5,4,3,2	chr4:31382451-31387168|chr4:31463369-31473461	4	9	6	18	13	27	39	31	17	0	7	2	1145.27	2861.92	906.767	2166.32	1516.28	3160.92	3020.76	3762.32	2259.2	0	2035.04	484.524	-0.558293	0.356401	0.733491	-0.959534	0.10744	0.561694	1.45264	0.0307664	0.306021	1.85388	0.00503603	0.237367
circEMC3	chr13	73300580	73303215	-	4	ENSSSCT00000012654.2	EMC3	7,6,5,4	chr13:73294478-73300580|chr13:73303215-73306043	0	0	3	3	0	4	8	4	0	0	1	0	0	0	453.383	361.054	0	468.284	619.642	485.461	0	0	290.72	0	-0.48212	0.725255	0.949643	-0.919049	0.487477	0.809934	1.41104	0.367533	0.635623	1.84797	0.22713	0.622599
circEML4	chr3	104182824	104195188	-	5	ENSSSCT00000009269.2	EML4	13,12,11,10,9	chr3:104171085-104182824|chr3:104195188-104197941	0	0	2	5	0	3	2	1	0	0	0	0	0	0	302.256	601.756	0	351.213	154.911	121.365	0	0	0	0	-1.17076	0.431142	0.762693	0.349314	0.814111	0.997152	4.13495	0.0498396	0.353946	2.61488	0.212415	0.611265
circEML4_2	chr3	104182824	104199715	-	8	ENSSSCT00000009269.2	EML4	13,12,11,10,9,8,7,6	chr3:104171085-104182824|chr3:104199715-104206748	0	5	5	9	5	7	6	3	6	0	1	0	0	1589.96	755.639	1083.16	583.186	819.498	464.732	364.096	797.364	0	290.72	0	-0.119117	0.862	1	0.503505	0.48214	0.805894	2.94807	0.00653689	0.177693	2.32545	0.0428243	0.454234
circEML4_3	chr3	104192111	104199715	-	6	ENSSSCT00000009269.2	EML4	11,10,9,8,7,6	chr3:104183209-104192111|chr3:104199715-104206748	0	0	0	1	5	12	0	0	1	1	0	0	0	0	0	120.351	583.186	1404.85	0	0	132.894	284.243	0	0	-5.24044	0.00469437	0.31183	-1.56554	0.388139	0.764073	2.71101	0.0632435	0.383942	-0.963887	0.567413	0.809197
circEML4_4	chr3	104192111	104209684	-	9	ENSSSCT00000009269.2	EML4	11,10,9,8,7,6,5,4,3	chr3:104183209-104192111|chr3:104209684-104213054	0	1	4	1	1	2	2	0	0	0	1	0	0	317.991	604.511	120.351	116.637	234.142	154.911	0	0	0	290.72	0	1.05522	0.348912	0.730496	2.12264	0.0799753	0.518525	0.677271	0.645527	0.83836	-0.390149	0.810333	0.979883
circEMSY	chr9	11740105	11751629	+	6	ENSSSCT00000016221.2	EMSY	3,4,5,6,7,8	chr9:11734000-11740105|chr9:11751629-11761217	0	1	0	0	2	0	1	2	1	0	0	0	0	317.991	0	0	233.274	0	77.4553	242.731	132.894	0	0	0	0.0902476	0.966911	1	-0.678279	0.674595	0.933241	2.34858	0.26139	0.564331	3.11711	0.141707	0.578381
circEMSY_2	chr9	11747251	11771988	+	5	ENSSSCT00000016221.2	EMSY	6,7,8,9,10	chr9:11743550-11747251|chr9:11771988-11779154	1	0	6	1	0	0	1	0	1	0	0	0	286.316	0	906.767	120.351	0	0	77.4553	0	132.894	0	0	0	2.98286	0.0394365	0.45914	2.38483	0.0798034	0.518525	1.61744	0.408894	0.670375	2.21546	0.279958	0.651471
circEMSY_3	chr9	11747251	11801305	+	10	ENSSSCT00000016221.2	EMSY	6,7,8,9,10,11,12,13,14,15	chr9:11743550-11747251|chr9:11801305-11809718	0	0	2	0	1	0	3	0	1	0	0	0	0	0	302.256	0	116.637	0	232.366	0	132.894	0	0	0	1.32705	0.430446	0.762693	-0.00468436	0.997217	1	1.60777	0.417894	0.672634	2.9395	0.174506	0.601796
circEMSY_4	chr9	11795660	11801305	+	3	ENSSSCT00000016221.2	EMSY	13,14,15	chr9:11782261-11795660|chr9:11801305-11809718	0	0	1	3	0	4	3	2	3	0	2	0	0	0	151.128	361.054	0	468.284	232.366	242.731	398.682	0	581.441	0	-1.69961	0.216443	0.651868	-1.74625	0.200355	0.644091	0.541917	0.661463	0.850382	0.588552	0.631827	0.854675
circEMSY_5	chr9	11795660	11811785	+	5	ENSSSCT00000016221.2	EMSY	13,14,15,16,17	chr9:11782261-11795660|chr9:11811785-11813039	0	0	3	2	0	0	0	2	0	0	1	0	0	0	453.383	240.703	0	0	0	242.731	0	0	290.72	0	0.951325	0.635032	0.913974	0.972202	0.62547	0.900204	-0.191858	0.930261	1	-0.212735	0.920293	1
circENO1	chr6	63739622	63744340	+	3	ENSSSCT00000026917.1	ENO1	1,2,3	None|chr6:63744340-63745678	0	2	2	0	1	1	1	4	0	0	0	0	0	635.982	302.256	0	116.637	117.071	77.4553	485.461	0	0	0	0	1.73902	0.225573	0.651868	0.683086	0.610037	0.894367	2.34988	0.257639	0.564331	3.40581	0.103066	0.552302
circENO1_2	chr6	63745678	63746888	+	3	ENSSSCT00000026917.1	ENO1	4,5,6	chr6:63744340-63745678|chr6:63746888-63748153	0	0	1	1	1	1	2	1	0	0	1	0	0	0	151.128	120.351	116.637	117.071	154.911	121.365	0	0	290.72	0	-0.559536	0.689475	0.942654	-0.389872	0.779427	0.981089	0.321905	0.821156	0.973771	0.152241	0.912948	1
circENOPH1	chr8	145151050	145156246	-	4	ENSSSCT00000010126.2	ENOPH1	5,4,3,2	chr8:145147191-145151050|chr8:145156246-145172318	0	0	0	9	1	4	0	1	1	0	2	1	0	0	0	1083.16	116.637	468.284	0	121.365	132.894	0	581.441	242.262	-4.90678	0.00618954	0.312928	-2.29838	0.22763	0.665228	0.978419	0.405582	0.669209	-1.62997	0.231015	0.625493
circENPEP	chr8	120025933	120042430	-	5	ENSSSCT00000010000.2	ENPEP	6,5,4,3,2	chr8:120019680-120025933|chr8:120042430-120060270	1	6	7	0	9	7	1	0	0	0	0	2	286.316	1907.95	1057.89	0	1049.73	819.498	77.4553	0	0	0	0	484.524	0.762395	0.437267	0.765789	4.39253	0.000484924	0.0439315	1.72871	0.159714	0.503534	-1.90143	0.209082	0.611265
circENPP2	chr4	20378228	20385281	+	3	ENSSSCT00000006585.2	ENPP2	3,4,5	chr4:20368665-20378228|chr4:20385281-20387698	0	0	2	0	1	0	0	0	0	0	0	0	0	0	302.256	0	116.637	0	0	0	0	0	0	0	1.1933	0.606281	0.891731	2.79771	0.164215	0.621111	1.60442	0.458497	0.689495	0	1	1
circENPP2_2	chr4	20383006	20385281	+	2	ENSSSCT00000006585.2	ENPP2	4,5	chr4:20378384-20383006|chr4:20385281-20387698	0	0	0	0	1	2	0	0	0	0	0	0	0	0	0	0	116.637	234.142	0	0	0	0	0	0	-2.8326	0.255202	0.651868	0	1	1	2.8326	0.27576	0.564331	0	1	1
circENSSSCG00000000486.2	chr5	35794492	35795037	+	2	ENSSSCT00000000524.2	ENSSSCG00000000486.2	8,9	chr5:35788372-35794492|chr5:35795037-35800097	0	0	0	6	3	1	2	0	2	0	2	0	0	0	0	722.108	349.911	117.071	154.911	0	265.788	0	581.441	0	-4.43793	0.0165863	0.368194	-3.05143	0.111318	0.562804	1.02486	0.430823	0.675855	-0.361643	0.795842	0.972894
circENSSSCG00000000500.2	chr5	36617421	36618643	+	3	ENSSSCT00000000539.2	ENSSSCG00000000500.2	2,3,4	chr5:36615874-36617421|chr5:36618643-36632250	0	0	4	2	0	0	2	0	2	0	1	0	0	0	604.511	240.703	0	0	154.911	0	265.788	0	290.72	0	1.38669	0.385771	0.743273	0.699978	0.647767	0.914597	-0.180325	0.922491	1	0.506385	0.77519	0.960592
circENSSSCG00000000500.2_2	chr5	36639408	36645328	+	4	ENSSSCT00000000539.2	ENSSSCG00000000500.2	6,7,8,9	chr5:36632346-36639408|chr5:36645328-36649033	0	0	2	1	0	1	0	1	0	0	0	0	0	0	302.256	120.351	0	117.071	0	121.365	0	0	0	0	0.564012	0.731955	0.949643	1.35298	0.423933	0.783364	2.3581	0.273707	0.564331	1.56912	0.430942	0.729046
circENSSSCG00000000508.2	chr5	38335075	38336140	-	2	ENSSSCT00000000547.2	ENSSSCG00000000508.2	7,6	chr5:38331619-38335075|chr5:38336140-38338233	2	0	2	8	10	10	10	6	2	4	1	3	572.633	0	302.256	962.81	1166.37	1170.71	774.553	728.192	265.788	1136.97	290.72	726.785	-1.80564	0.0131113	0.361575	-0.98727	0.207466	0.65421	0.597262	0.34391	0.616464	-0.221109	0.744227	0.942444
circENSSSCG00000000508.2_2	chr5	38338233	38341434	-	3	ENSSSCT00000000547.2	ENSSSCG00000000508.2	5,4,3	chr5:38336140-38338233|chr5:38341434-38341811	0	0	0	2	3	3	1	0	1	0	0	0	0	0	0	240.703	349.911	351.213	77.4553	0	132.894	0	0	0	-4.12534	0.0101982	0.344828	-2.21626	0.218617	0.659311	4.12534	0.0169104	0.235202	2.21626	0.253727	0.647009
circENSSSCG00000000555.2	chr5	50645242	50660921	+	8	ENSSSCT00000000598.2	ENSSSCG00000000555.2	8,9,10,11,12,13,14,15	chr5:50631015-50645242|chr5:50660921-50689037	0	0	1	2	0	0	3	0	1	0	0	0	0	0	151.128	240.703	0	0	232.366	0	132.894	0	0	0	-0.228476	0.91275	1	-0.789605	0.673222	0.931937	2.36775	0.279897	0.568959	2.92887	0.190671	0.606976
circENSSSCG00000000555.2_2	chr5	50724810	50806131	+	8	ENSSSCT00000000598.2	ENSSSCG00000000555.2	21,22,23,24,25,26,27,28	chr5:50699658-50724810|chr5:50806131-50820505	0	0	1	0	0	0	0	0	3	0	0	0	0	0	151.128	0	0	0	0	0	398.682	0	0	0	2.06185	0.252445	0.651868	-0.884163	0.711399	0.94656	0	1	1	2.94602	0.244718	0.639137
circENSSSCG00000000555.2_3	chr5	50900168	50910867	+	4	ENSSSCT00000000598.2	ENSSSCG00000000555.2	36,37,38,39	chr5:50895942-50900168|chr5:50910867-50990031	0	0	1	2	3	1	7	1	1	0	0	0	0	0	151.128	240.703	349.911	117.071	542.187	121.365	132.894	0	0	0	-1.48695	0.282964	0.676049	-1.75245	0.190159	0.639972	3.73752	0.0540982	0.369279	4.00303	0.0343949	0.440027
circENSSSCG00000000719.2	chr5	67971974	67976486	-	3	ENSSSCT00000000782.2	ENSSSCG00000000719.2	9,8,7	chr5:67969389-67971974|chr5:67976486-67980627	0	1	6	2	0	0	3	0	2	1	0	0	0	317.991	906.767	240.703	0	0	232.366	0	265.788	284.243	0	0	2.25068	0.101357	0.581337	1.31746	0.302056	0.703342	-0.16749	0.921447	1	0.765735	0.630878	0.853945
circENSSSCG00000000719.2_2	chr5	67971974	67983356	-	6	ENSSSCT00000000782.2	ENSSSCG00000000719.2	9,8,7,6,5,4	chr5:67969389-67971974|chr5:67983356-67987939	0	0	2	0	0	2	1	0	0	0	0	0	0	0	302.256	0	0	234.142	77.4553	0	0	0	0	0	0.447626	0.847033	0.997892	1.47509	0.524976	0.835657	2.3472	0.339177	0.616461	1.31974	0.504348	0.767047
circENSSSCG00000000840.2	chr5	82625768	82639265	+	6	ENSSSCT00000000914.2	ENSSSCG00000000840.2	15,16,17,18,19,20	chr5:82624995-82625768|chr5:82639265-82640166	0	1	0	0	0	2	2	0	0	0	0	0	0	317.991	0	0	0	234.142	154.911	0	0	0	0	0	0.268972	0.925211	1	0.66102	0.81078	0.995143	2.34687	0.356964	0.624176	1.95482	0.408088	0.729046
circENSSSCG00000000862.2	chr5	86391425	86396910	+	4	ENSSSCT00000028915.1	ENSSSCG00000000862.2	16,17,18,19	chr5:86389963-86391425|chr5:86396910-86397124	0	0	1	2	3	3	10	0	2	1	3	2	0	0	151.128	240.703	349.911	351.213	774.553	0	265.788	284.243	872.161	484.524	-1.86939	0.16005	0.622196	-2.11458	0.100947	0.556797	-0.754982	0.448693	0.688338	-0.509793	0.5987	0.83147
circENSSSCG00000000864.2	chr5	86459916	86468959	-	4	ENSSSCT00000000943.2	ENSSSCG00000000864.2	6,5,4,3	chr5:86457347-86459916|chr5:86468959-86477861	0	0	0	0	0	1	6	2	0	0	0	0	0	0	0	0	0	117.071	464.732	242.731	0	0	0	0	-1.60856	0.394611	0.745204	-3.78003	0.084862	0.529716	1.60856	0.424954	0.674593	3.78003	0.0997956	0.546593
circENSSSCG00000000999.2	chr7	2977562	2978229	+	1	ENSSSCT00000001090.2	ENSSSCG00000000999.2	2	chr7:2906756-2977562|chr7:2978229-3054255	0	3	7	2	19	5	20	3	9	1	1	2	0	953.973	1057.89	240.703	2216.11	585.355	1549.11	364.096	1196.05	284.243	290.72	484.524	-0.514231	0.550247	0.849884	-0.562892	0.509644	0.819342	1.45596	0.134162	0.480461	1.50462	0.119006	0.572872
circENSSSCG00000001002.2	chr7	2466500	2471089	-	2	ENSSSCT00000001094.2	ENSSSCG00000001002.2	3,2	chr7:2464228-2466500|chr7:2471089-2471645	0	0	6	2	0	0	9	2	1	1	0	0	0	0	906.767	240.703	0	0	697.097	242.731	132.894	284.243	0	0	1.94241	0.167443	0.622417	-0.0437466	0.975181	1	-0.168006	0.922103	1	1.81815	0.245138	0.639137
circENSSSCG00000001097.2	chr7	20819677	20820636	-	2	ENSSSCT00000001193.2	ENSSSCG00000001097.2	4,3	chr7:20817921-20819677|chr7:20820636-20825380	3	4	3	4	2	6	3	4	0	0	0	0	858.949	1271.96	453.383	481.405	233.274	702.427	232.366	485.461	0	0	0	0	0.742213	0.356677	0.733491	1.64818	0.0547338	0.457529	4.68319	0.00694446	0.177693	3.77722	0.0427392	0.454234
circENSSSCG00000001485.2	chr7	31081350	31108955	-	5	ENSSSCT00000001657.2	ENSSSCG00000001485.2	8,7,6,5,4	chr7:31069202-31081350|chr7:31108955-31118330	8	12	76	55	28	40	24	11	21	3	4	10	2290.53	3815.89	11485.7	6619.32	3265.84	4682.84	1858.93	1335.02	2790.78	852.728	1162.88	2422.62	0.323618	0.544059	0.846302	1.60594	0.00402807	0.166692	1.67607	0.00608647	0.171444	0.393748	0.53163	0.779539
circENSSSCG00000001641.2	chr7	43147748	43150180	+	2	ENSSSCT00000001825.2	ENSSSCG00000001641.2	3,4	chr7:43121467-43147748|chr7:43150180-43157538	1	0	1	0	2	5	2	1	1	0	0	2	286.316	0	151.128	0	233.274	585.355	154.911	121.365	132.894	0	0	484.524	-0.793414	0.533253	0.838358	0.105307	0.937069	1	0.591569	0.645101	0.838131	-0.307152	0.817845	0.984704
circENSSSCG00000001641.2_2	chr7	43157538	43168820	+	6	ENSSSCT00000001825.2	ENSSSCG00000001641.2	5,6,7,8,9,10	chr7:43150180-43157538|chr7:43168820-43170748	0	0	1	0	2	0	0	0	0	0	0	0	0	0	151.128	0	233.274	0	0	0	0	0	0	0	-0.302111	0.908409	1	2.04172	0.255482	0.678587	2.34384	0.339073	0.616461	0	1	1
circENSSSCG00000001641.2_3	chr7	43188489	43195707	+	6	ENSSSCT00000001825.2	ENSSSCG00000001641.2	18,19,20,21,22,23	chr7:43186706-43188489|chr7:43195707-43197296	0	0	0	2	1	3	0	0	0	8	1	0	0	0	0	240.703	116.637	351.213	0	0	0	2273.94	290.72	0	-3.73852	0.0659218	0.52478	0	1	1	-1.7601	0.198605	0.527125	-5.49862	0.00117799	0.122233
circENSSSCG00000001641.2_4	chr7	43194490	43197345	+	3	ENSSSCT00000001825.2	ENSSSCG00000001641.2	22,23,24	chr7:43192480-43194490|chr7:43197345-43198241	0	0	0	0	0	0	2	0	0	0	2	0	0	0	0	0	0	0	154.911	0	0	0	581.441	0	0	1	1	-1.98172	0.347422	0.732063	-3.45272	0.108515	0.451689	-1.471	0.517605	0.774081
circENSSSCG00000001799.2	chr7	57270686	57280795	+	3	ENSSSCT00000002015.2	ENSSSCG00000001799.2	1,2,3	None|chr7:57280795-57287174	5	0	1	9	3	6	3	1	4	0	0	2	1431.58	0	151.128	1083.16	349.911	702.427	232.366	121.365	531.576	0	0	484.524	-0.511755	0.592015	0.882003	0.741092	0.469161	0.804873	1.90121	0.0943795	0.43226	0.64836	0.596108	0.828766
circENSSSCG00000001814.2	chr7	58165468	58189856	-	15	ENSSSCT00000002033.2	ENSSSCG00000001814.2	17,16,15,14,13,12,11,10,9,8,7,6,5,4,3	chr7:58163617-58165468|chr7:58189856-58190225	0	0	0	1	2	1	0	0	5	0	0	2	0	0	0	120.351	233.274	117.071	0	0	664.47	0	0	484.524	-3.20341	0.135572	0.602346	-3.58969	0.0993772	0.555527	-0.103918	0.950851	1	0.282362	0.875008	1
circENSSSCG00000002003.2	chr7	80416945	80417483	-	3	ENSSSCT00000002241.2	ENSSSCG00000002003.2	14,13,12	chr7:80414882-80416945|chr7:80417483-80420330	0	0	0	6	8	2	1	0	0	0	0	0	0	0	0	722.108	933.097	234.142	77.4553	0	0	0	0	0	-5.08434	0.00378131	0.282473	-1.4448	0.401534	0.770955	5.08434	0.00584705	0.171444	1.4448	0.435302	0.729046
circENSSSCG00000002351.2	chr7	102941795	102945740	+	3	ENSSSCT00000002615.2	ENSSSCG00000002351.2	5,6,7	chr7:102939205-102941795|chr7:102945740-102946828	0	0	0	0	2	0	0	0	0	0	0	0	0	0	0	0	233.274	0	0	0	0	0	0	0	-2.34344	0.330758	0.708887	0	1	1	2.34344	0.352977	0.619789	0	1	1
circENSSSCG00000002414.2	chr7	110410028	110411170	-	2	ENSSSCT00000002683.2	ENSSSCG00000002414.2	10,9	chr7:110405878-110410028|chr7:110411170-110413344	0	1	4	0	0	0	4	0	0	0	1	0	0	317.991	604.511	0	0	0	309.821	0	0	0	290.72	0	4.16608	0.0283585	0.446841	1.37076	0.422603	0.783364	-2.5528	0.162056	0.505226	0.242524	0.891337	1
circENSSSCG00000002547.2	chr7	130879956	130880371	-	2	ENSSSCT00000002830.2	ENSSSCG00000002547.2	8,7	chr7:130876927-130879956|chr7:130880371-130882991	2	0	2	7	5	7	5	6	4	2	3	2	572.633	0	302.256	842.459	583.186	819.498	387.276	728.192	531.576	568.485	872.161	484.524	-1.25899	0.100596	0.581337	-0.77906	0.330763	0.719945	0.233804	0.731906	0.898662	-0.246122	0.728855	0.932134
circENSSSCG00000002547.2_2	chr7	130879956	130883781	-	4	ENSSSCT00000002830.2	ENSSSCG00000002547.2	8,7,6,5	chr7:130876927-130879956|chr7:130883781-130886832	0	0	3	1	3	2	4	2	4	0	3	2	0	0	453.383	120.351	349.911	234.142	309.821	242.731	531.576	0	872.161	484.524	-0.134232	0.902534	1	-0.683285	0.494186	0.812363	-0.884544	0.358762	0.625687	-0.335491	0.710819	0.918176
circENSSSCG00000002547.2_3	chr7	130882991	130883781	-	2	ENSSSCT00000002830.2	ENSSSCG00000002547.2	6,5	chr7:130880371-130882991|chr7:130883781-130886832	0	0	0	1	0	0	4	0	0	0	1	0	0	0	0	120.351	0	0	309.821	0	0	0	290.72	0	-1.62478	0.425531	0.762693	-2.74377	0.250251	0.677032	-0.945088	0.690362	0.87127	0.173901	0.937861	1
circENSSSCG00000002876.2	chr6	39555555	39563150	+	5	ENSSSCT00000003178.2	ENSSSCG00000002876.2	2,3,4,5,6	chr6:39552641-39555555|chr6:39563150-39569148	2	0	3	2	1	0	3	0	4	0	0	1	572.633	0	453.383	240.703	116.637	0	232.366	0	531.576	0	0	242.262	1.46683	0.235	0.651868	0.500696	0.661499	0.924665	0.354148	0.822081	0.973771	1.32028	0.367939	0.695295
circENSSSCG00000003398.2	chr6	64288024	64290820	-	4	ENSSSCT00000003769.2	ENSSSCG00000003398.2	16,15,14,13	chr6:64286360-64288024|chr6:64290820-64292402	1	4	6	2	2	6	6	4	0	0	1	2	286.316	1271.96	906.767	240.703	233.274	702.427	464.732	485.461	0	0	290.72	484.524	1.0322	0.211868	0.651837	1.25172	0.131102	0.589078	0.520265	0.612746	0.816277	0.300751	0.76986	0.957541
circENSSSCG00000003398.2_2	chr6	64288024	64292459	-	5	ENSSSCT00000003769.2	ENSSSCG00000003398.2	16,15,14,13,12	chr6:64286360-64288024|chr6:64292459-64295449	0	1	3	1	0	0	3	0	1	0	0	0	0	317.991	453.383	120.351	0	0	232.366	0	132.894	0	0	0	2.34829	0.1024	0.581337	0.997621	0.43418	0.783793	1.61658	0.406133	0.669209	2.96725	0.146493	0.578381
circENSSSCG00000003398.2_3	chr6	64288024	64295533	-	6	ENSSSCT00000003769.2	ENSSSCG00000003398.2	16,15,14,13,12,11	chr6:64286360-64288024|chr6:64295533-64299156	0	0	0	0	3	0	0	0	1	0	0	0	0	0	0	0	349.911	0	0	0	132.894	0	0	0	-2.83038	0.239808	0.651868	-1.66087	0.420777	0.783142	2.83038	0.261192	0.564331	1.66087	0.44715	0.732388
circENSSSCG00000003486.2	chr6	70490049	70495076	-	2	ENSSSCT00000003872.2	ENSSSCG00000003486.2	15,14	chr6:70488745-70490049|chr6:70495076-70502626	0	0	0	0	0	1	0	0	0	0	0	0	0	0	0	0	0	117.071	0	0	0	0	0	0	-1.60631	0.453075	0.773536	0	1	1	1.60631	0.476509	0.696275	0	1	1
circENSSSCG00000003486.2_2	chr6	70504054	70507573	-	3	ENSSSCT00000003872.2	ENSSSCG00000003486.2	12,11,10	chr6:70502727-70504054|chr6:70507573-70507823	2	0	3	6	7	9	23	4	10	2	3	1	572.633	0	453.383	722.108	816.46	1053.64	1781.47	485.461	1328.94	568.485	872.161	242.262	-1.17923	0.1269	0.602346	-1.68009	0.0224984	0.361006	0.646524	0.387348	0.656416	1.14738	0.107552	0.56025
circENSSSCG00000003512.2	chr6	73284405	73304281	-	6	ENSSSCT00000003902.2	ENSSSCG00000003512.2	12,11,10,9,8,7	chr6:73282294-73284405|chr6:73304281-73305898	0	0	0	0	0	0	3	3	0	0	0	0	0	0	0	0	0	0	232.366	364.096	0	0	0	0	0	1	1	-3.52048	0.153486	0.610304	0	1	1	3.52048	0.170465	0.601796
circENSSSCG00000003580.2	chr6	78655584	78659294	-	3	ENSSSCT00000003975.2	ENSSSCG00000003580.2	8,7,6	chr6:78652337-78655584|chr6:78659294-78664134	0	0	1	0	1	0	3	0	2	0	0	2	0	0	151.128	0	116.637	0	232.366	0	265.788	0	0	484.524	0.584501	0.725998	0.949643	-1.10194	0.498012	0.812694	-1.71816	0.295051	0.579143	-0.0317204	0.981989	1
circENSSSCG00000003679.2	chr6	91918115	91919964	+	4	ENSSSCT00000004076.2	ENSSSCG00000003679.2	6,7,8,9	chr6:91840949-91918115|chr6:91919964-91934014	2	2	7	9	16	9	12	8	6	1	1	2	572.633	635.982	1057.89	1083.16	1866.19	1053.64	929.463	970.923	797.364	284.243	290.72	484.524	-0.700908	0.212547	0.651837	-0.147242	0.80225	0.99267	1.83706	0.00919726	0.20019	1.28339	0.0833943	0.525447
circENSSSCG00000003747.2	chr6	113681717	113682391	+	1	ENSSSCT00000004149.2	ENSSSCG00000003747.2	2	chr6:113564908-113681717|chr6:113682391-113695690	0	0	1	3	5	3	2	0	0	0	0	0	0	0	151.128	361.054	583.186	351.213	154.911	0	0	0	0	0	-2.29046	0.0606302	0.507603	0.104264	0.944856	1	4.56101	0.00959733	0.202774	2.16629	0.26829	0.651471
circENSSSCG00000003784.1	chr6	128736987	128753848	+	3	ENSSSCT00000004187.1	ENSSSCG00000003784.1	3,4,5	chr6:128723030-128736987|chr6:128753848-128766118	0	0	0	5	4	6	14	4	0	0	0	5	0	0	0	601.756	466.549	702.427	1084.37	485.461	0	0	0	1211.31	-4.99379	0.00677705	0.321044	-4.88324	0.00798674	0.234838	0.452865	0.69709	0.875193	0.342317	0.766217	0.955345
circENSSSCG00000003828.2	chr6	140604562	140639893	-	3	ENSSSCT00000004237.2	ENSSSCG00000003828.2	6,5,4	chr6:140508799-140604562|chr6:140639893-140654254	9	4	10	22	22	9	21	2	9	0	3	4	2576.85	1271.96	1511.28	2647.73	2566.02	1053.64	1626.56	242.731	1196.05	0	872.161	969.047	-0.233839	0.72512	0.949643	0.749552	0.27495	0.688831	1.71025	0.0263898	0.292909	0.726861	0.360797	0.687545
circENSSSCG00000003828.2_2	chr6	140633017	140660768	-	4	ENSSSCT00000004237.2	ENSSSCG00000003828.2	5,4,3,2	chr6:140604651-140633017|chr6:140660768-140676065	0	0	0	2	2	2	0	0	0	0	0	1	0	0	0	240.703	233.274	234.142	0	0	0	0	0	242.262	-3.73786	0.0343609	0.45914	0	1	1	1.2334	0.358681	0.625687	-2.50446	0.116369	0.572872
circENSSSCG00000003853.2	chr6	147026311	147052351	+	3	ENSSSCT00000004265.2	ENSSSCG00000003853.2	5,6,7	chr6:147025024-147026311|chr6:147052351-147058598	0	0	0	0	2	1	6	0	0	3	0	1	0	0	0	0	233.274	117.071	464.732	0	0	852.728	0	242.262	-2.83412	0.17357	0.631142	-3.29913	0.114723	0.568223	-1.48945	0.361932	0.628925	-1.02443	0.518751	0.774081
circENSSSCG00000004082.2_2	chr1	16415159	16481887	+	22	ENSSSCT00000004511.2	ENSSSCG00000004082.2	12,13,14,15,16,17,18,19,20,21,22,23,24,25,26,27,28,29,30,31,32,33	chr1:16412381-16415159|chr1:16481887-16483414	0	0	0	0	1	1	0	0	0	0	0	0	0	0	0	0	116.637	117.071	0	0	0	0	0	0	-2.34519	0.330523	0.708887	0	1	1	2.34519	0.352736	0.619789	0	1	1
circ4082	chr1	16463107	16473752	+	3	ENSSSCT00000004511.2	ENSSSCG00000004082.2	26,27,28	chr1:16450509-16463107|chr1:16473752-16478397	0	1	0	1	1	0	3	2	0	1	0	0	0	317.991	0	120.351	116.637	0	232.366	242.731	0	284.243	0	0	0.0296145	0.991594	1	-0.897939	0.531818	0.840503	-0.169958	0.915781	1	0.757595	0.606201	0.837587
circENSSSCG00000004082.2_4	chr1	16472493	16473752	+	2	ENSSSCT00000004511.2	ENSSSCG00000004082.2	27,28	chr1:16463270-16472493|chr1:16473752-16478397	0	0	2	0	2	0	3	0	0	0	1	0	0	0	302.256	0	233.274	0	232.366	0	0	0	290.72	0	0.506056	0.794156	0.974382	0.412936	0.832269	1	-0.215724	0.920787	1	-0.122604	0.960202	1
circENSSSCG00000004082.2_5	chr1	16492759	16494951	+	2	ENSSSCT00000004511.2	ENSSSCG00000004082.2	41,42	chr1:16490988-16492759|chr1:16494951-16495997	0	0	0	2	1	4	14	1	2	0	0	0	0	0	0	240.703	116.637	468.284	1084.37	121.365	265.788	0	0	0	-3.9443	0.036905	0.45914	-4.80037	0.00835472	0.243522	3.9443	0.0486398	0.349873	4.80037	0.01209	0.316606
circENSSSCG00000004108.2	chr1	18698061	18701550	+	3	ENSSSCT00000004543.2	ENSSSCG00000004108.2	2,3,4	chr1:18690778-18698061|chr1:18701550-18702669	0	0	0	0	2	2	1	0	1	0	0	0	0	0	0	0	233.274	234.142	77.4553	0	132.894	0	0	0	-3.19906	0.106214	0.581337	-2.21549	0.249094	0.677032	3.19906	0.127888	0.469396	2.21549	0.280844	0.651471
circENSSSCG00000004123.2	chr1	23010568	23016578	-	4	ENSSSCT00000004558.2	ENSSSCG00000004123.2	19,18,17,16	chr1:23003728-23010568|chr1:23016578-23026020	1	1	0	6	0	1	0	0	1	0	0	0	286.316	317.991	0	722.108	0	117.071	0	0	132.894	0	0	0	-0.576202	0.728853	0.949643	1.7784	0.320469	0.712969	3.96146	0.0788242	0.40678	1.60687	0.426475	0.729046
circENSSSCG00000004196.2	chr1	35488668	35489992	-	2	ENSSSCT00000004637.2	ENSSSCG00000004196.2	11,10	chr1:35486301-35488668|chr1:35489992-35491105	1	0	7	3	4	5	4	1	4	0	0	1	286.316	0	1057.89	361.054	466.549	585.355	309.821	121.365	531.576	0	0	242.262	0.199724	0.809212	0.981715	0.748271	0.386701	0.764073	2.17677	0.0779046	0.406122	1.62822	0.205775	0.610405
circENSSSCG00000004205.2	chr1	37134828	37143270	+	3	ENSSSCT00000004646.2	ENSSSCG00000004205.2	5,6,7	chr1:37126736-37134828|chr1:37143270-37147243	0	0	0	4	2	0	9	1	1	2	0	1	0	0	0	481.405	233.274	0	697.097	121.365	132.894	568.485	0	242.262	-3.74516	0.0515086	0.48914	-4.21561	0.0251367	0.371182	-0.17587	0.892574	1	0.294577	0.813179	0.981908
circENSSSCG00000004329.2	chr1	64731984	64735305	-	3	ENSSSCT00000004785.2	ENSSSCG00000004329.2	12,11,10	chr1:64730490-64731984|chr1:64735305-64737842	0	0	3	0	0	0	1	1	0	0	0	0	0	0	453.383	0	0	0	77.4553	121.365	0	0	0	0	3.33627	0.0831987	0.554362	1.15606	0.545139	0.850701	0	1	1	2.1802	0.325021	0.672453
circENSSSCG00000004473.2	chr1	97905978	97924771	+	3	ENSSSCT00000004941.2	ENSSSCG00000004473.2	5,6,7	chr1:97889582-97905978|chr1:97924771-97942911	3	0	2	6	7	2	3	6	1	0	0	0	858.949	0	302.256	722.108	816.46	234.142	232.366	728.192	132.894	0	0	0	-0.599388	0.53768	0.841484	0.0904863	0.928238	1	4.99469	0.00473124	0.152736	4.30481	0.0202776	0.375528
circENSSSCG00000004556.2	chr1	118835828	118837146	+	3	ENSSSCT00000005033.2	ENSSSCG00000004556.2	11,12,13	chr1:118833466-118835828|chr1:118837146-118837723	0	0	0	0	0	0	5	0	0	0	0	0	0	0	0	0	0	0	387.276	0	0	0	0	0	0	1	1	-2.95973	0.552161	0.85465	0	1	1	2.95973	0.560174	0.803124
circENSSSCG00000004590.2	chr1	125219031	125219611	-	2	ENSSSCT00000005071.2	ENSSSCG00000004590.2	5,4	chr1:125216446-125219031|chr1:125219611-125221101	9	5	8	19	12	19	19	28	10	11	14	10	2576.85	1589.96	1209.02	2286.67	1399.65	2224.35	1471.65	3398.23	1328.94	3126.67	4070.08	2422.62	-0.189033	0.719374	0.949643	-0.2435	0.641268	0.908744	-0.688509	0.162656	0.505226	-0.634043	0.195023	0.606976
circENSSSCG00000004592.2	chr1	125143607	125147925	+	3	ENSSSCT00000005073.2	ENSSSCG00000004592.2	3,4,5	chr1:125134109-125143607|chr1:125147925-125156965	25	25	105	112	144	111	198	66	102	19	46	41	7157.91	7949.78	15868.4	13479.3	16795.7	12994.9	15336.1	8010.11	13555.2	5400.61	13373.1	9932.73	-0.402439	0.0829614	0.554362	-0.184667	0.427915	0.783793	0.592037	0.0145413	0.22716	0.374265	0.123955	0.572872
circENSSSCG00000004592.2_2	chr1	125143607	125162014	+	7	ENSSSCT00000005073.2	ENSSSCG00000004592.2	3,4,5,6,7,8,9	chr1:125134109-125143607|chr1:125162014-125165716	0	0	0	2	0	1	7	3	1	0	0	0	0	0	0	240.703	0	117.071	542.187	364.096	132.894	0	0	0	-2.84639	0.13282	0.602346	-4.31155	0.0152552	0.329422	2.84639	0.159715	0.503534	4.31155	0.0220367	0.38273
circENSSSCG00000004693.2	chr1	141982454	141989824	+	3	ENSSSCT00000005183.2	ENSSSCG00000004693.2	3,4,5	chr1:141952320-141982454|chr1:141989824-141993841	0	0	1	1	0	2	10	2	0	1	0	0	0	0	151.128	120.351	0	234.142	774.553	242.731	0	284.243	0	0	-0.645522	0.699414	0.94366	-2.10121	0.174851	0.62612	0.311029	0.85106	0.988138	1.76672	0.257317	0.647009
circENSSSCG00000004693.2_2	chr1	141982454	141994380	+	5	ENSSSCT00000005183.2	ENSSSCG00000004693.2	3,4,5,6,7	chr1:141952320-141982454|chr1:141994380-141994453	2	0	1	3	6	6	6	1	3	1	0	1	572.633	0	151.128	361.054	699.823	702.427	464.732	121.365	398.682	284.243	0	242.262	-1.29459	0.146934	0.618747	-0.542028	0.566927	0.865619	1.61097	0.101263	0.441394	0.858406	0.412887	0.729046
circENSSSCG00000004693.2_3	chr1	141993841	141994380	+	2	ENSSSCT00000005183.2	ENSSSCG00000004693.2	6,7	chr1:141989824-141993841|chr1:141994380-141994453	2	0	0	1	2	4	4	1	2	0	2	1	572.633	0	0	120.351	233.274	468.284	309.821	121.365	265.788	0	581.441	242.262	-0.720437	0.533547	0.838358	-0.532785	0.644581	0.911661	0.0164377	0.987712	1	-0.171214	0.876414	1
circENSSSCG00000004814.2	chr1	154299283	154339318	+	4	ENSSSCT00000005314.2	ENSSSCG00000004814.2	2,3,4,5	chr1:154223816-154299283|chr1:154339318-154362173	2	0	7	2	3	2	1	2	4	0	0	0	572.633	0	1057.89	240.703	349.911	234.142	77.4553	242.731	531.576	0	0	0	1.10098	0.245865	0.651868	1.1602	0.220904	0.662064	3.94374	0.0379698	0.329728	3.88452	0.0416802	0.450685
circENSSSCG00000004814.2_2	chr1	154336618	154339318	+	2	ENSSSCT00000005314.2	ENSSSCG00000004814.2	4,5	chr1:154314006-154336618|chr1:154339318-154362173	0	0	0	0	0	1	2	1	0	0	0	1	0	0	0	0	0	117.071	154.911	121.365	0	0	0	242.262	-1.60948	0.381997	0.742756	-2.61228	0.187258	0.639087	-0.868146	0.625542	0.825193	0.134655	0.936	1
circENSSSCG00000004857.2	chr1	161713075	161765610	-	5	ENSSSCT00000005363.2	ENSSSCG00000004857.2	10,9,8,7,6	chr1:161704214-161713075|chr1:161765610-161768719	0	0	5	7	12	1	1	1	1	2	1	0	0	0	755.639	842.459	1399.65	117.071	77.4553	121.365	132.894	568.485	290.72	0	-1.25647	0.247509	0.651868	1.41771	0.24554	0.677032	1.44541	0.211984	0.541331	-1.22877	0.352035	0.681011
circENSSSCG00000004857.2_2	chr1	161725477	161765610	-	4	ENSSSCT00000005363.2	ENSSSCG00000004857.2	9,8,7,6	chr1:161713156-161725477|chr1:161765610-161768719	0	0	1	4	1	6	0	0	0	0	1	0	0	0	151.128	481.405	116.637	702.427	0	0	0	0	290.72	0	-2.33342	0.0951107	0.569987	2.2306	0.150333	0.608593	2.03264	0.150685	0.498604	-2.53139	0.12201	0.572872
circENSSSCG00000004857.2_3	chr1	161745225	161765610	-	3	ENSSSCT00000005363.2	ENSSSCG00000004857.2	8,7,6	chr1:161725572-161745225|chr1:161765610-161768719	1	0	3	0	2	3	6	4	0	0	0	0	286.316	0	453.383	0	233.274	351.213	464.732	485.461	0	0	0	0	0.458528	0.712575	0.948018	-0.230218	0.849664	1	3.48968	0.0875414	0.424044	4.17843	0.0350082	0.440027
circENSSSCG00000004857.2_4	chr1	161765501	161781848	-	4	ENSSSCT00000005360.2	ENSSSCG00000004857.2	5,4,3,2	chr1:161752119-161765501|chr1:161781848-161792760	2	0	2	4	1	3	3	1	0	0	0	1	572.633	0	302.256	481.405	116.637	351.213	232.366	121.365	0	0	0	242.262	-0.0687637	0.946841	1	1.06857	0.335253	0.725479	1.62671	0.219472	0.541331	0.489372	0.730579	0.932522
circENSSSCG00000004979.2	chr1	188119161	188121283	-	2	ENSSSCT00000005491.2	ENSSSCG00000004979.2	12,11	chr1:188117340-188119161|chr1:188121283-188122074	0	0	2	0	0	0	0	0	3	0	0	0	0	0	302.256	0	0	0	0	0	398.682	0	0	0	2.73118	0.272411	0.667487	-0.241455	0.945946	1	0	1	1	2.97264	0.340855	0.674952
circENSSSCG00000004998.2	chr1	195188813	195189760	-	2	ENSSSCT00000005513.2	ENSSSCG00000004998.2	3,2	chr1:195187374-195188813|chr1:195189760-195190063	0	0	0	0	2	0	0	0	0	0	0	2	0	0	0	0	233.274	0	0	0	0	0	0	484.524	-2.34451	0.295165	0.687079	0	1	1	-0.938642	0.672484	0.85748	-3.28315	0.107369	0.56025
circENSSSCG00000005076.2	chr1	208501652	208513821	+	4	ENSSSCT00000005594.2	ENSSSCG00000005076.2	5,6,7,8	chr1:208500657-208501652|chr1:208513821-208523213	0	0	0	0	3	0	0	0	0	0	0	0	0	0	0	0	349.911	0	0	0	0	0	0	0	-2.83002	0.255536	0.651868	0	1	1	2.83002	0.276105	0.564331	0	1	1
circENSSSCG00000005135.2	chr1	224091689	224114675	-	5	ENSSSCT00000005663.2	ENSSSCG00000005135.2	6,5,4,3,2	chr1:224080019-224091689|chr1:224114675-224115199	0	0	0	6	0	9	9	2	0	0	0	0	0	0	0	722.108	0	1053.64	697.097	242.731	0	0	0	0	-4.99725	0.0165425	0.368194	-4.17562	0.0440619	0.437012	4.99725	0.0212069	0.26455	4.17562	0.0546058	0.473818
circENSSSCG00000005135.2_2	chr1	224111539	224114675	-	3	ENSSSCT00000005663.2	ENSSSCG00000005135.2	4,3,2	chr1:224095362-224111539|chr1:224114675-224115199	0	1	3	1	0	5	8	4	2	0	0	0	0	317.991	453.383	120.351	0	585.355	619.642	485.461	265.788	0	0	0	0.25198	0.820221	0.988848	-0.681645	0.518016	0.828826	3.73581	0.0556238	0.371965	4.66943	0.0108837	0.299035
circENSSSCG00000005198.2	chr1	240860922	240879186	-	3	ENSSSCT00000005730.2	ENSSSCG00000005198.2	8,7,6	chr1:240860178-240860922|chr1:240879186-240908252	4	2	10	5	1	3	10	6	6	0	0	1	1145.27	635.982	1511.28	601.756	116.637	351.213	774.553	728.192	797.364	0	0	242.262	1.67214	0.0115475	0.351883	0.599262	0.303603	0.705739	1.77734	0.137881	0.488045	2.85021	0.00659646	0.259913
circENSSSCG00000005241.2	chr1	247785596	247805744	+	7	ENSSSCT00000005775.2	ENSSSCG00000005241.2	2,3,4,5,6,7,8	chr1:247781953-247785596|chr1:247805744-247809562	1	0	1	9	1	7	12	6	4	1	0	1	286.316	0	151.128	1083.16	116.637	819.498	929.463	728.192	531.576	284.243	0	242.262	-2.02454	0.0451838	0.476495	-2.17086	0.0285777	0.388856	1.79469	0.0789629	0.40678	1.94101	0.052739	0.473818
circENSSSCG00000005391.2	chr1	270602783	270619968	+	4	ENSSSCT00000005934.2	ENSSSCG00000005391.2	2,3,4,5	chr1:270575746-270602783|chr1:270619968-270638083	0	1	0	1	2	3	0	0	0	0	1	0	0	317.991	0	120.351	233.274	351.213	0	0	0	0	290.72	0	-1.33373	0.365432	0.738695	2.40075	0.137251	0.597919	1.20183	0.422413	0.673516	-2.53265	0.123184	0.572872
circENSSSCG00000005423.2	chr1	275800352	275806120	-	3	ENSSSCT00000005966.2	ENSSSCG00000005423.2	5,4,3	chr1:275782888-275800352|chr1:275806120-275819574	0	1	2	1	0	3	0	0	1	0	0	0	0	317.991	302.256	120.351	0	351.213	0	0	132.894	0	0	0	0.413076	0.769786	0.963328	2.04204	0.184287	0.634872	3.20526	0.128789	0.470775	1.5763	0.422153	0.729046
circENSSSCG00000006100.2	chr4	45558505	45564762	+	3	ENSSSCT00000006691.2	ENSSSCG00000006100.2	6,7,8	chr4:45556702-45558505|chr4:45564762-45567651	0	0	0	3	5	8	2	5	1	2	1	0	0	0	0	361.054	583.186	936.569	154.911	606.827	132.894	568.485	290.72	0	-5.08047	0.00164069	0.211523	-4.00861	0.021568	0.361006	1.14085	0.254053	0.564331	0.0689918	0.949321	1
circENSSSCG00000006100.2_2	chr4	45567651	45573063	+	5	ENSSSCT00000006691.2	ENSSSCG00000006100.2	9,10,11,12,13	chr4:45564762-45567651|chr4:45573063-45576145	0	1	2	0	1	4	0	1	0	0	1	0	0	317.991	302.256	0	116.637	468.284	0	121.365	0	0	290.72	0	0.130598	0.923334	1	2.07053	0.173956	0.62612	0.951945	0.551334	0.762406	-0.987989	0.565783	0.807366
circENSSSCG00000006100.2_3	chr4	45570786	45573063	+	4	ENSSSCT00000006691.2	ENSSSCG00000006100.2	10,11,12,13	chr4:45567734-45570786|chr4:45573063-45576145	0	0	0	0	0	2	0	0	0	0	0	0	0	0	0	0	0	234.142	0	0	0	0	0	0	-2.34694	0.330289	0.708887	0	1	1	2.34694	0.352496	0.619789	0	1	1
circENSSSCG00000006100.2_4	chr4	45572097	45573063	+	2	ENSSSCT00000006691.2	ENSSSCG00000006100.2	12,13	chr4:45571568-45572097|chr4:45573063-45576145	0	0	0	0	1	0	0	3	3	0	0	0	0	0	0	0	116.637	0	0	364.096	398.682	0	0	0	-1.60632	0.40161	0.747887	-3.80282	0.0980423	0.554195	1.60632	0.431079	0.675855	3.80282	0.113061	0.571762
circENSSSCG00000006202.2	chr4	73714672	73718330	-	3	ENSSSCT00000029434.1	ENSSSCG00000006202.2	13,12,11	chr4:73710726-73714672|chr4:73718330-73721778	0	0	0	1	4	6	5	3	2	0	0	0	0	0	0	120.351	466.549	702.427	387.276	364.096	265.788	0	0	0	-4.5578	0.00634818	0.312928	-4.24784	0.0125035	0.301522	4.5578	0.0102439	0.206853	4.24784	0.0190817	0.370902
circENSSSCG00000006202.2_2	chr4	73759206	73762650	-	3	ENSSSCT00000029434.1	ENSSSCG00000006202.2	5,4,3	chr4:73738414-73759206|chr4:73762650-73767527	2	0	1	1	3	0	2	2	4	0	1	1	572.633	0	151.128	120.351	349.911	0	154.911	242.731	531.576	0	290.72	242.262	0.509092	0.668518	0.934476	-0.321747	0.771198	0.975493	-0.174733	0.891181	1	0.656106	0.583598	0.820436
circENSSSCG00000006202.2_3	chr4	73759206	73767631	-	4	ENSSSCT00000029434.1	ENSSSCG00000006202.2	5,4,3,2	chr4:73738414-73759206|chr4:73767631-73782752	0	4	1	0	0	1	1	2	0	0	0	1	0	1271.96	151.128	0	0	117.071	77.4553	242.731	0	0	0	242.262	2.983	0.0600101	0.506225	1.87971	0.199951	0.644091	-0.868231	0.625367	0.825193	0.235052	0.892931	1
circENSSSCG00000006239.2	chr4	81206145	81225995	-	6	ENSSSCT00000006837.2	ENSSSCG00000006239.2	7,6,5,4,3,2	chr4:81204716-81206145|chr4:81225995-81232138	1	3	5	2	1	0	5	7	0	0	0	0	286.316	953.973	755.639	240.703	116.637	0	387.276	849.557	0	0	0	0	2.32363	0.0370251	0.45914	0.662517	0.49835	0.812694	2.84593	0.160159	0.504088	4.50705	0.0159039	0.341731
circENSSSCG00000006277.2	chr4	87543027	87545344	-	2	ENSSSCT00000006876.2	ENSSSCG00000006277.2	3,2	chr4:87410007-87543027|chr4:87545344-87610087	0	1	3	3	4	1	1	0	0	0	3	0	0	317.991	453.383	361.054	466.549	117.071	77.4553	0	0	0	872.161	0	-0.151014	0.898497	1	2.53208	0.0666263	0.484449	0.168491	0.888276	1	-2.5146	0.0811022	0.519735
circENSSSCG00000006346.2	chr4	96740133	96757270	-	5	ENSSSCT00000006954.2	ENSSSCG00000006346.2	17,16,15,14,13	chr4:96672357-96740133|chr4:96757270-96774977	0	0	0	0	6	2	0	0	0	0	0	0	0	0	0	0	699.823	234.142	0	0	0	0	0	0	-4.1127	0.0947112	0.569987	0	1	1	4.1127	0.10742	0.451689	0	1	1
circENSSSCG00000006346.2_2	chr4	96774977	96776508	-	2	ENSSSCT00000006954.2	ENSSSCG00000006346.2	12,11	chr4:96757270-96774977|chr4:96776508-96794065	0	0	1	2	1	1	2	2	0	0	0	0	0	0	151.128	240.703	116.637	117.071	154.911	242.731	0	0	0	0	-0.93983	0.499125	0.811316	-0.769098	0.580217	0.875287	3.20763	0.101091	0.441222	3.03689	0.120393	0.572872
circENSSSCG00000006388.2	chr4	98125119	98128385	+	3	ENSSSCT00000007001.2	ENSSSCG00000006388.2	4,5,6	chr4:98120729-98125119|chr4:98128385-98134106	3	1	1	12	1	6	7	4	2	1	1	0	858.949	317.991	151.128	1444.22	116.637	702.427	542.187	485.461	265.788	284.243	290.72	0	-0.868854	0.343953	0.72824	-0.123242	0.89429	1	1.93533	0.0723895	0.393912	1.18972	0.288386	0.653682
circENSSSCG00000006388.2_2	chr4	98125119	98134217	+	4	ENSSSCT00000007001.2	ENSSSCG00000006388.2	4,5,6,7	chr4:98120729-98125119|chr4:98134217-98141974	1	0	0	1	1	0	4	0	0	0	0	2	286.316	0	0	120.351	116.637	0	309.821	0	0	0	0	484.524	0.0913906	0.96766	1	-0.354308	0.835724	1	-0.950055	0.593144	0.799445	-0.504356	0.773958	0.959824
circENSSSCG00000006388.2_3	chr4	98128290	98143200	+	5	ENSSSCT00000007001.2	ENSSSCG00000006388.2	6,7,8,9,10	chr4:98127102-98128290|chr4:98143200-98145110	0	0	1	0	2	1	1	1	1	0	0	0	0	0	151.128	0	233.274	117.071	77.4553	121.365	132.894	0	0	0	-0.578304	0.69258	0.942944	-0.452573	0.758935	0.970603	2.83883	0.154972	0.499738	2.7131	0.173017	0.601796
circENSSSCG00000006508.2	chr4	103228325	103230166	+	3	ENSSSCT00000026228.1	ENSSSCG00000006508.2	6,7,8	chr4:103209792-103228325|chr4:103230166-103237683	0	0	0	8	3	0	2	0	0	0	0	1	0	0	0	962.81	349.911	0	154.911	0	0	0	0	242.262	-4.57534	0.0320627	0.45914	-2.05039	0.288794	0.698242	2.10552	0.232379	0.554729	-0.419436	0.821792	0.984756
circENSSSCG00000006508.2_2	chr4	103237683	103251183	+	5	ENSSSCT00000007128.2	ENSSSCG00000006508.2	10,11,12,13,14	chr4:103230166-103237683|chr4:103251183-103255290	0	0	0	0	0	0	3	0	1	0	0	1	0	0	0	0	0	0	232.366	0	132.894	0	0	242.262	0	1	1	-2.92071	0.18405	0.634707	-2.45558	0.179605	0.508992	0.46513	0.816076	0.983379
circENSSSCG00000006508.2_3	chr4	103237683	103255448	+	6	ENSSSCT00000007128.2	ENSSSCG00000006508.2	10,11,12,13,14,15	chr4:103230166-103237683|chr4:103255448-103259806	0	0	0	0	1	1	0	1	0	0	0	0	0	0	0	0	116.637	117.071	0	121.365	0	0	0	0	-2.34549	0.317043	0.704982	-1.60738	0.436776	0.783793	2.34549	0.340244	0.616461	1.60738	0.462232	0.734227
circENSSSCG00000006709.2	chr4	110972980	110976614	+	4	ENSSSCT00000007349.2	ENSSSCG00000006709.2	23,24,25,26	chr4:110971757-110972980|chr4:110976614-110977318	0	0	2	3	4	1	1	2	0	0	1	1	0	0	302.256	361.054	466.549	117.071	77.4553	242.731	0	0	290.72	242.262	-1.05619	0.364412	0.738529	0.365397	0.770362	0.97528	0.746552	0.524572	0.736426	-0.675036	0.604216	0.836223
circENSSSCG00000006841.2	chr4	121576594	121586783	+	8	ENSSSCT00000007492.2	ENSSSCG00000006841.2	2,3,4,5,6,7,8,9	chr4:121572933-121576594|chr4:121586783-121588702	0	0	0	4	3	3	0	0	0	1	0	0	0	0	0	481.405	349.911	351.213	0	0	0	284.243	0	0	-4.43157	0.00555032	0.31183	0	1	1	1.9138	0.106599	0.451499	-2.51777	0.112236	0.57089
circENSSSCG00000006841.2	chr4	121576594	121582456	+	5	ENSSSCT00000007492.2	ENSSSCG00000006841.2	2,3,4,5,6	chr4:121572933-121576594|chr4:121582456-121583797	0	0	1	6	1	3	7	9	0	0	2	0	0	0	151.128	722.108	116.637	351.213	542.187	1092.29	0	0	581.441	0	-2.22328	0.131532	0.602346	-2.67637	0.064334	0.476373	1.02288	0.446692	0.688262	1.47598	0.263091	0.649098
circENSSSCG00000006851.2	chr4	122750449	122757907	+	4	ENSSSCT00000007504.2	ENSSSCG00000006851.2	5,6,7,8	chr4:122748501-122750449|chr4:122757907-122761820	0	0	0	4	3	5	0	0	0	0	0	0	0	0	0	481.405	349.911	585.355	0	0	0	0	0	0	-4.68292	0.00311509	0.261045	0	1	1	4.68292	0.00560057	0.169127	0	1	1
circENSSSCG00000006870.2	chr4	129639340	129642250	-	2	ENSSSCT00000007523.2	ENSSSCG00000006870.2	4,3	chr4:129636841-129639340|chr4:129642250-129643257	0	0	6	1	1	5	0	0	0	0	0	0	0	0	906.767	120.351	116.637	585.355	0	0	0	0	0	0	0.303714	0.842578	0.996861	4.24368	0.0170761	0.333888	3.93997	0.0813989	0.411935	0	1	1
circENSSSCG00000006889.2	chr4	134785875	134791670	+	5	ENSSSCT00000007544.2	ENSSSCG00000006889.2	2,3,4,5,6	chr4:134771008-134785875|chr4:134791670-134793016	0	0	0	5	2	0	1	2	5	0	0	0	0	0	0	601.756	233.274	0	77.4553	242.731	664.47	0	0	0	-3.9549	0.0479148	0.480548	-4.13205	0.0385595	0.430059	3.9549	0.0603183	0.383942	4.13205	0.0491074	0.468969
circENSSSCG00000006989.2	chr17	5895187	5937612	-	3	ENSSSCT00000007654.2	ENSSSCG00000006989.2	4,3,2	chr17:5885744-5895187|chr17:5937612-5945292	0	0	0	0	1	0	4	0	0	0	0	1	0	0	0	0	116.637	0	309.821	0	0	0	0	242.262	-1.60472	0.426498	0.762693	-2.74573	0.246727	0.677032	-0.833073	0.716496	0.887685	0.307941	0.894464	1
circENSSSCG00000007203.2	chr17	39442883	39451333	+	4	ENSSSCT00000007882.2	ENSSSCG00000007203.2	2,3,4,5	chr17:39413999-39442883|chr17:39451333-39452987	0	0	0	2	1	0	0	4	2	0	0	0	0	0	0	240.703	116.637	0	0	485.461	265.788	0	0	0	-2.84932	0.171798	0.628529	-3.77305	0.0775439	0.514708	2.84932	0.196563	0.524322	3.77305	0.092567	0.537871
circENSSSCG00000007203.2_2	chr17	39442883	39454524	+	6	ENSSSCT00000007882.2	ENSSSCG00000007203.2	2,3,4,5,6,7	chr17:39413999-39442883|chr17:39454524-39458820	1	0	4	2	2	4	3	3	0	0	0	0	286.316	0	604.511	240.703	233.274	468.284	232.366	364.096	0	0	0	0	0.151789	0.873782	1	0.720539	0.473818	0.804961	4.12447	0.025866	0.289976	3.55572	0.0629985	0.494008
circENSSSCG00000007203.2_3	chr17	39462649	39463937	+	2	ENSSSCT00000007882.2	ENSSSCG00000007203.2	11,12	chr17:39461379-39462649|chr17:39463937-39465992	3	1	10	13	4	9	5	5	3	1	1	5	858.949	317.991	1511.28	1564.57	466.549	1053.64	387.276	606.827	398.682	284.243	290.72	1211.31	-0.0502349	0.939642	1	1.07973	0.124232	0.580904	0.705055	0.334595	0.615072	-0.424914	0.591325	0.824167
circENSSSCG00000007789.2	chr3	18139501	18140393	-	3	ENSSSCT00000008537.2	ENSSSCG00000007789.2	13,12,11	chr3:18137837-18139501|chr3:18140393-18141174	1	0	3	4	8	5	9	10	0	0	2	0	286.316	0	453.383	481.405	933.097	585.355	697.097	1213.65	0	0	581.441	0	-1.1818	0.239273	0.651868	-1.13661	0.255475	0.678587	1.76213	0.118138	0.459033	1.71694	0.126584	0.573565
circENSSSCG00000007845.2	chr3	24725452	24726864	-	3	ENSSSCT00000008595.2	ENSSSCG00000007845.2	4,3,2	chr3:24723668-24725452|chr3:24726864-24729484	0	0	0	4	3	3	1	0	4	0	0	0	0	0	0	481.405	349.911	351.213	77.4553	0	531.576	0	0	0	-4.4328	0.0162846	0.368194	-3.44695	0.0710977	0.495467	4.4328	0.0227374	0.276398	3.44695	0.0895156	0.533236
circENSSSCG00000007878.2	chr3	29760500	29768928	+	3	ENSSSCT00000008633.2	ENSSSCG00000007878.2	7,8,9	chr3:29740557-29760500|chr3:29768928-29830058	5	2	9	8	6	10	12	6	8	3	4	4	1431.58	635.982	1360.15	962.81	699.823	1170.71	929.463	728.192	1063.15	852.728	1162.88	969.047	0.333008	0.527456	0.83444	0.390744	0.454924	0.797092	-0.0709474	0.901671	1	-0.128683	0.821606	0.984756
circENSSSCG00000007878.2_2	chr3	29760500	29830248	+	4	ENSSSCT00000008633.2	ENSSSCG00000007878.2	7,8,9,10	chr3:29740557-29760500|chr3:29830248-29865183	0	0	0	0	0	1	0	1	0	0	0	1	0	0	0	0	0	117.071	0	121.365	0	0	0	242.262	-1.6069	0.431334	0.762693	-1.60576	0.433825	0.783793	-0.82782	0.725794	0.894763	-0.828962	0.721388	0.926473
circENSSSCG00000008068.2_5	chr3	42964693	42969522	-	3	ENSSSCT00000008841.2	ENSSSCG00000008068.2	22,21,20	chr3:42963220-42964693|chr3:42969522-42971688	0	0	3	0	5	3	8	4	3	3	0	4	0	0	453.383	0	583.186	351.213	619.642	485.461	398.682	852.728	0	969.047	-0.55665	0.614096	0.897662	-1.22596	0.238558	0.674014	-0.945855	0.324114	0.608774	-0.276544	0.760984	0.951798
circENSSSCG00000008068.2_6	chr3	42971688	42985848	-	10	ENSSSCT00000008841.2	ENSSSCG00000008068.2	19,18,17,16,15,14,13,12,11,10	chr3:42969522-42971688|chr3:42985848-42989536	0	0	0	0	2	2	3	0	0	0	0	0	0	0	0	0	233.274	234.142	232.366	0	0	0	0	0	-3.19606	0.164994	0.622196	-2.44065	0.255124	0.678587	3.19606	0.185102	0.50983	2.44065	0.281028	0.651471
circENSSSCG00000008105.2	chr3	46253972	46261633	+	5	ENSSSCT00000008879.2	ENSSSCG00000008105.2	4,5,6,7,8	chr3:46251261-46253972|chr3:46261633-46262973	0	0	1	0	2	4	0	0	1	0	0	0	0	0	151.128	0	233.274	468.284	0	0	132.894	0	0	0	-1.56674	0.372099	0.739279	0.561448	0.735374	0.958595	3.72883	0.0922491	0.427909	1.60064	0.425348	0.729046
circENSSSCG00000008105.2_2	chr3	46253972	46273625	+	10	ENSSSCT00000008879.2	ENSSSCG00000008105.2	4,5,6,7,8,9,10,11,12,13	chr3:46251261-46253972|chr3:46273625-46274805	0	0	1	1	3	2	0	0	0	0	0	0	0	0	151.128	120.351	349.911	234.142	0	0	0	0	0	0	-1.48238	0.281999	0.676049	2.25248	0.143417	0.603499	3.73487	0.0536191	0.368884	0	1	1
circENSSSCG00000008105.2_3	chr3	46256146	46261633	+	4	ENSSSCT00000008879.2	ENSSSCG00000008105.2	5,6,7,8	chr3:46254068-46256146|chr3:46261633-46262973	0	0	0	0	3	4	1	0	0	0	0	0	0	0	0	0	349.911	468.284	77.4553	0	0	0	0	0	-3.93448	0.0714657	0.52478	-1.38263	0.431015	0.783793	3.93448	0.0849625	0.418815	1.38263	0.461845	0.734227
circENSSSCG00000008127.2	chr3	49039215	49041491	+	4	ENSSSCT00000008903.2	ENSSSCG00000008127.2	15,16,17,18	chr3:49037702-49039215|chr3:49041491-49042317	0	0	0	4	1	1	3	1	0	0	0	0	0	0	0	481.405	116.637	117.071	232.366	121.365	0	0	0	0	-3.74531	0.0489992	0.486515	-2.95581	0.121372	0.579834	3.74531	0.0632867	0.383942	2.95581	0.146411	0.578381
circENSSSCG00000008137.2	chr3	49800302	49801631	+	3	ENSSSCT00000008914.2	ENSSSCG00000008137.2	2,3,4	chr3:49791671-49800302|chr3:49801631-49803759	1	0	1	1	0	4	2	2	1	0	0	0	286.316	0	151.128	120.351	0	468.284	154.911	242.731	132.894	0	0	0	-0.35001	0.788858	0.971794	-0.204493	0.87621	1	3.49484	0.0800848	0.40848	3.34932	0.093845	0.537871
circENSSSCG00000008211.2	chr3	60663336	60664311	+	2	ENSSSCT00000008992.2	ENSSSCG00000008211.2	3,4	chr3:60659051-60663336|chr3:60664311-60668255	2	0	3	10	3	4	3	4	6	0	0	0	572.633	0	453.383	1203.51	349.911	468.284	232.366	485.461	797.364	0	0	0	-0.838074	0.347299	0.730496	-0.374464	0.684614	0.935137	5.17495	0.00203925	0.110251	4.71134	0.00698955	0.259913
circENSSSCG00000008222.2	chr3	60994826	61006491	+	2	ENSSSCT00000031530.1	ENSSSCG00000008222.2	2,3	chr3:60965130-60994826|chr3:61006491-61032328	1	0	0	0	2	0	1	2	4	2	0	2	286.316	0	0	0	233.274	0	77.4553	242.731	531.576	568.485	0	484.524	0.0274471	0.992237	1	-1.53489	0.291843	0.698704	-1.94573	0.144882	0.495808	-0.383391	0.74673	0.944186
circENSSSCG00000008312.2	chr3	74582640	74583377	-	2	ENSSSCT00000009103.2	ENSSSCG00000008312.2	19,18	chr3:74581125-74582640|chr3:74583377-74585019	0	0	0	0	0	0	3	2	0	1	0	0	0	0	0	0	0	0	232.366	242.731	0	284.243	0	0	0	1	1	-3.24582	0.135388	0.596377	-2.54176	0.163304	0.505226	0.704063	0.709569	0.917267
circENSSSCG00000008353.2	chr3	77625136	77634093	+	4	ENSSSCT00000009147.2	ENSSSCG00000008353.2	9,10,11,12	chr3:77617394-77625136|chr3:77634093-77635640	0	0	1	1	2	4	4	0	0	0	0	0	0	0	151.128	120.351	233.274	468.284	309.821	0	0	0	0	0	-1.74509	0.273417	0.668445	-0.657132	0.68333	0.934866	3.94006	0.0601706	0.383942	2.8521	0.171238	0.601796
circENSSSCG00000008382.2	chr3	84254790	84274997	+	4	ENSSSCT00000009178.2	ENSSSCG00000008382.2	3,4,5,6	chr3:84252757-84254790|chr3:84274997-84288159	0	0	0	3	2	9	6	4	0	0	0	0	0	0	0	361.054	233.274	1053.64	464.732	485.461	0	0	0	0	-4.89455	0.00691682	0.321044	-4.18123	0.0240838	0.36722	4.89455	0.0101412	0.206256	4.18123	0.0328493	0.440027
circENSSSCG00000008382.2_2	chr3	84423734	84430797	+	6	ENSSSCT00000009178.2	ENSSSCG00000008382.2	29,30,31,32,33,34	chr3:84414121-84423734|chr3:84430797-84438630	0	0	0	0	0	2	2	4	1	0	1	0	0	0	0	0	0	234.142	154.911	485.461	132.894	0	290.72	0	-2.35113	0.221999	0.651868	-3.83435	0.0454119	0.437012	-0.183348	0.913044	1	1.29987	0.392039	0.71884
circENSSSCG00000008408.2	chr3	91185716	91190405	+	2	ENSSSCT00000009205.2	ENSSSCG00000008408.2	2,3	chr3:91049133-91185716|chr3:91190405-91200222	0	0	0	3	2	4	1	0	0	0	0	0	0	0	0	361.054	233.274	468.284	77.4553	0	0	0	0	0	-4.28652	0.0100513	0.344828	-1.47624	0.390126	0.765683	4.28652	0.0159217	0.231324	1.47624	0.424959	0.729046
circENSSSCG00000008409.2	chr3	91035888	91039048	+	2	ENSSSCT00000009207.2	ENSSSCG00000008409.2	2,3	chr3:91013955-91035888|chr3:91039048-91039086	8	0	4	5	4	12	2	2	1	1	0	0	2290.53	0	604.511	601.756	466.549	1404.85	154.911	242.731	132.894	284.243	0	0	0.194024	0.81268	0.984497	2.31078	0.0138398	0.317746	2.94163	0.0151957	0.22716	0.824878	0.557949	0.801648
circENSSSCG00000008433.2	chr3	99569225	99570048	-	3	ENSSSCT00000009234.2	ENSSSCG00000008433.2	5,4,3	chr3:99568207-99569225|chr3:99570048-99576562	1	4	3	5	17	1	24	17	6	2	9	3	286.316	1271.96	453.383	601.756	1982.83	117.071	1858.93	2063.21	797.364	568.485	2616.48	726.785	-0.487971	0.590222	0.880866	-1.28748	0.145597	0.603499	-0.506955	0.551885	0.762854	0.292556	0.723329	0.927898
circENSSSCG00000008478.2	chr3	107388013	107410577	+	6	ENSSSCT00000009280.2	ENSSSCG00000008478.2	4,5,6,7,8,9	chr3:107382186-107388013|chr3:107410577-107430339	0	0	1	0	4	11	6	4	2	0	0	1	0	0	151.128	0	466.549	1287.78	464.732	485.461	265.788	0	0	242.262	-2.75492	0.0458248	0.477033	-2.25677	0.107227	0.561694	2.4923	0.073533	0.394405	1.99416	0.159439	0.597002
circENSSSCG00000008512.2	chr3	113891378	113909062	-	4	ENSSSCT00000009315.2	ENSSSCG00000008512.2	9,8,7,6	chr3:113861798-113891378|chr3:113909062-113926445	0	0	0	0	0	4	2	0	0	0	0	0	0	0	0	0	0	468.284	154.911	0	0	0	0	0	-3.19649	0.293816	0.684752	-1.93358	0.427752	0.783793	3.19649	0.309369	0.595296	1.93358	0.447911	0.732746
circENSSSCG00000008591.2	chr3	122008498	122016380	+	5	ENSSSCT00000009401.2	ENSSSCG00000008591.2	2,3,4,5,6	chr3:121987867-122008498|chr3:122016380-122019906	0	0	3	7	4	2	4	5	2	0	1	0	0	0	453.383	842.459	466.549	234.142	309.821	606.827	265.788	0	290.72	0	-1.20788	0.220518	0.651868	-0.826751	0.413113	0.778361	2.2752	0.0625219	0.383942	1.89408	0.131167	0.574282
circENSSSCG00000008591.2_2	chr3	122008498	122020038	+	6	ENSSSCT00000009401.2	ENSSSCG00000008591.2	2,3,4,5,6,7	chr3:121987867-122008498|chr3:122020038-122022810	2	0	3	4	4	4	3	5	3	2	0	0	572.633	0	453.383	481.405	466.549	468.284	232.366	606.827	398.682	568.485	0	0	-0.327923	0.68761	0.942654	-0.0742442	0.930215	1	1.2945	0.196416	0.524322	1.04082	0.308684	0.663701
circENSSSCG00000008591.2_3	chr3	122008498	122024159	+	8	ENSSSCT00000009401.2	ENSSSCG00000008591.2	2,3,4,5,6,7,8,9	chr3:121987867-122008498|chr3:122024159-122027589	0	0	0	0	4	0	0	1	1	0	0	0	0	0	0	0	466.549	0	0	121.365	132.894	0	0	0	-3.19327	0.199369	0.649073	-2.39932	0.298041	0.701987	3.19327	0.218338	0.541331	2.39932	0.322	0.669693
circENSSSCG00000008591.2_4	chr3	122008498	122030888	+	11	ENSSSCT00000009401.2	ENSSSCG00000008591.2	2,3,4,5,6,7,8,9,10,11,12	chr3:121987867-122008498|chr3:122030888-122035666	0	1	3	5	2	3	3	2	1	1	0	0	0	317.991	453.383	601.756	233.274	351.213	232.366	242.731	132.894	284.243	0	0	-0.398719	0.656136	0.92651	0.465131	0.627396	0.901134	1.91461	0.111292	0.451689	1.05076	0.419296	0.729046
circENSSSCG00000008591.2_5	chr3	122012246	122016380	+	3	ENSSSCT00000009401.2	ENSSSCG00000008591.2	4,5,6	chr3:122011615-122012246|chr3:122016380-122019906	0	2	1	0	4	0	2	3	0	0	0	0	0	635.982	151.128	0	466.549	0	154.911	364.096	0	0	0	0	0.608501	0.710708	0.94762	0.469261	0.773172	0.976257	3.1959	0.149747	0.498604	3.33514	0.132606	0.574282
circENSSSCG00000008591.2_6	chr3	122012246	122020038	+	4	ENSSSCT00000009401.2	ENSSSCG00000008591.2	4,5,6,7	chr3:122011615-122012246|chr3:122020038-122022810	0	3	0	1	2	2	2	4	1	0	0	0	0	953.973	0	120.351	233.274	234.142	154.911	485.461	132.894	0	0	0	0.390617	0.763536	0.959219	0.0535698	0.970168	1	3.49377	0.0831528	0.415661	3.83082	0.0536258	0.473818
circENSSSCG00000008591.2_7	chr3	122022810	122030888	+	5	ENSSSCT00000009401.2	ENSSSCG00000008591.2	8,9,10,11,12	chr3:122020038-122022810|chr3:122030888-122035666	0	0	1	3	0	14	4	0	1	0	0	0	0	0	151.128	361.054	0	1639	309.821	0	132.894	0	0	0	-2.98672	0.0696093	0.52478	-1.01824	0.544243	0.850344	5.16499	0.0147662	0.22716	3.19651	0.135783	0.57572
circENSSSCG00000008592.2_8	chr3	122078614	122103795	+	6	ENSSSCT00000009403.2	ENSSSCG00000008592.2	4,5,6,7,8,9	chr3:122075138-122078614|chr3:122103795-122107275	0	0	0	3	0	1	3	3	0	0	0	0	0	0	0	361.054	0	117.071	232.366	364.096	0	0	0	0	-3.21643	0.117818	0.599738	-3.53248	0.0854971	0.530612	3.21643	0.139016	0.489478	3.53248	0.102908	0.552302
circENSSSCG00000008619.2	chr3	130451750	130455965	+	4	ENSSSCT00000009430.2	ENSSSCG00000008619.2	3,4,5,6	chr3:130451197-130451750|chr3:130455965-130457544	4	8	17	7	10	12	47	16	11	2	1	5	1145.27	2543.93	2569.17	842.459	1166.37	1404.85	3640.4	1941.85	1461.83	568.485	290.72	1211.31	0.888801	0.116196	0.599738	-0.175387	0.739908	0.960058	0.661266	0.336578	0.616461	1.72545	0.00705141	0.259913
circENSSSCG00000008788.2	chr8	32181172	32181491	-	2	ENSSSCT00000009614.2	ENSSSCG00000008788.2	19,18	chr8:32179598-32181172|chr8:32181491-32181896	0	0	0	2	0	0	4	1	0	0	0	0	0	0	0	240.703	0	0	309.821	121.365	0	0	0	0	-2.3705	0.280631	0.674803	-3.13546	0.178545	0.628659	2.3705	0.306287	0.592021	3.13546	0.198746	0.608094
circENSSSCG00000008803.2	chr8	35200344	35206039	-	3	ENSSSCT00000009632.2	ENSSSCG00000008803.2	17,16,15	chr8:35197038-35200344|chr8:35206039-35223803	0	0	1	7	4	4	4	2	2	0	0	2	0	0	151.128	842.459	466.549	468.284	309.821	242.731	265.788	0	0	484.524	-2.70461	0.012188	0.358371	-1.66511	0.165302	0.621111	1.62084	0.0915003	0.427861	0.581341	0.585041	0.820965
circENSSSCG00000008826.2	chr8	40451376	40459063	-	4	ENSSSCT00000009659.2	ENSSSCG00000008826.2	29,28,27,26	chr8:40436994-40451376|chr8:40459063-40466079	1	0	0	3	0	3	1	0	4	0	0	0	286.316	0	0	361.054	0	351.213	77.4553	0	531.576	0	0	0	-1.31036	0.451569	0.772275	-1.05228	0.547752	0.852794	3.74373	0.0909494	0.427861	3.48565	0.115651	0.572872
circENSSSCG00000008826.2_2	chr8	40466079	40492645	-	13	ENSSSCT00000009659.2	ENSSSCG00000008826.2	25,24,23,22,21,20,19,18,17,16,15,14,13	chr8:40459063-40466079|chr8:40492645-40493851	0	0	0	0	0	0	3	3	1	0	0	0	0	0	0	0	0	0	232.366	364.096	132.894	0	0	0	0	1	1	-3.78195	0.0415417	0.437012	0	1	1	3.78195	0.0549807	0.473818
circENSSSCG00000009007.2	chr8	80044191	80053480	+	4	ENSSSCT00000009864.2	ENSSSCG00000009007.2	2,3,4,5	chr8:79971267-80044191|chr8:80053480-80072911	0	0	0	0	1	2	4	0	3	1	0	0	0	0	0	0	116.637	234.142	309.821	0	398.682	284.243	0	0	-2.83681	0.148455	0.620674	-3.74984	0.0538229	0.455038	0.306462	0.850037	0.987292	1.21949	0.432361	0.729046
circENSSSCG00000009007.2_2	chr8	80072911	80085622	+	11	ENSSSCT00000009864.2	ENSSSCG00000009007.2	6,7,8,9,10,11,12,13,14,15,16	chr8:80053480-80072911|chr8:80085622-80088442	0	0	1	0	3	1	0	0	0	0	0	0	0	0	151.128	0	349.911	117.071	0	0	0	0	0	0	-1.08588	0.595768	0.883635	2.10948	0.205124	0.652594	3.19536	0.178227	0.508992	0	1	1
circENSSSCG00000009134.2	chr8	120393697	120396735	-	2	ENSSSCT00000010002.2	ENSSSCG00000009134.2	5,4	chr8:120392426-120393697|chr8:120396735-120412527	0	2	0	0	0	0	9	0	0	0	0	0	0	635.982	0	0	0	0	697.097	0	0	0	0	0	3.53275	0.144002	0.61611	-0.213874	0.935319	1	0	1	1	3.74662	0.199152	0.608094
circENSSSCG00000009172.2	chr8	128726505	128740274	+	4	ENSSSCT00000010044.2	ENSSSCG00000009172.2	3,4,5,6	chr8:128610482-128726505|chr8:128740274-128745695	0	1	0	1	5	0	3	3	2	0	0	0	0	317.991	0	120.351	583.186	0	232.366	364.096	265.788	0	0	0	-1.33704	0.359509	0.735484	-1.59292	0.267577	0.684465	3.73322	0.0622839	0.383942	3.9891	0.0434587	0.454581
circENSSSCG00000009172.2_2	chr8	128735199	128779487	+	9	ENSSSCT00000010044.2	ENSSSCG00000009172.2	4,5,6,7,8,9,10,11,12	chr8:128726630-128735199|chr8:128779487-128795643	0	0	1	4	4	0	4	1	0	0	0	0	0	0	151.128	481.405	466.549	0	309.821	121.365	0	0	0	0	-1.94455	0.233168	0.651868	-0.99851	0.544438	0.850344	4.12974	0.0519099	0.363331	3.1837	0.133581	0.574388
circENSSSCG00000009270.2	chr11	114926	116545	-	2	ENSSSCT00000010151.2	ENSSSCG00000009270.2	9,8	chr11:113626-114926|chr11:116545-117762	0	2	2	1	4	1	4	0	2	0	2	0	0	635.982	302.256	120.351	466.549	117.071	309.821	0	265.788	0	581.441	0	0.348852	0.764924	0.959231	0.566319	0.628514	0.90226	0.325175	0.800846	0.957701	0.107707	0.931235	1
circENSSSCG00000009324.2	chr11	6345843	6350185	+	3	ENSSSCT00000010217.2	ENSSSCG00000009324.2	2,3,4	chr11:6317649-6345843|chr11:6350185-6355627	0	0	0	4	6	7	1	2	0	0	2	2	0	0	0	481.405	699.823	819.498	77.4553	242.731	0	0	581.441	484.524	-5.16699	0.000556147	0.140868	-2.69969	0.13735	0.597919	0.858083	0.308136	0.593773	-1.60921	0.132411	0.574282
circENSSSCG00000009337.2	chr11	8572053	8574435	+	3	ENSSSCT00000010233.2	ENSSSCG00000009337.2	9,10,11	chr11:8562768-8572053|chr11:8574435-8578019	0	0	0	0	0	3	0	0	0	0	0	0	0	0	0	0	0	351.213	0	0	0	0	0	0	-2.83389	0.255036	0.651868	0	1	1	2.83389	0.275588	0.564331	0	1	1
circENSSSCG00000009410.2	chr11	21429242	21431377	+	2	ENSSSCT00000010311.2	ENSSSCG00000009410.2	3,4	chr11:21428398-21429242|chr11:21431377-21433684	0	2	4	7	7	1	2	4	3	0	0	0	0	635.982	604.511	842.459	816.46	117.071	154.911	485.461	398.682	0	0	0	-0.430798	0.653811	0.925887	0.364845	0.71258	0.94656	4.99638	0.00492083	0.155202	4.20073	0.0252533	0.415524
circENSSSCG00000009449.2	chr11	35045322	35067542	+	3	ENSSSCT00000010359.2	ENSSSCG00000009449.2	2,3,4	chr11:34989550-35045322|chr11:35067542-35079897	0	0	3	5	4	2	3	4	2	0	1	2	0	0	453.383	601.756	466.549	234.142	232.366	485.461	265.788	0	290.72	484.524	-0.947934	0.319772	0.704982	-0.528276	0.592634	0.883874	0.651276	0.497973	0.712119	0.231618	0.816158	0.983379
circENSSSCG00000009449.2_2	chr11	35045322	35080039	+	4	ENSSSCT00000010359.2	ENSSSCG00000009449.2	2,3,4,5	chr11:34989550-35045322|chr11:35080039-35087650	0	0	0	0	0	2	0	0	0	0	0	0	0	0	0	0	0	234.142	0	0	0	0	0	0	-2.34694	0.330289	0.708887	0	1	1	2.34694	0.352496	0.619789	0	1	1
circENSSSCG00000009457.2	chr11	48358889	48409967	-	2	ENSSSCT00000010367.2	ENSSSCG00000009457.2	3,2	chr11:48302743-48358889|chr11:48409967-48597494	0	0	0	0	0	0	1	0	0	0	0	0	0	0	0	0	0	0	77.4553	0	0	0	0	0	0	1	1	-1.30103	0.499933	0.812694	0	1	1	1.30103	0.523585	0.774081
circENSSSCG00000009464.2	chr11	52212324	52216641	+	2	ENSSSCT00000010375.2	ENSSSCG00000009464.2	3,4	chr11:52209742-52212324|chr11:52216641-52224092	0	0	0	1	1	3	2	0	0	0	0	0	0	0	0	120.351	116.637	351.213	154.911	0	0	0	0	0	-3.49374	0.0810462	0.551922	-2.08105	0.270826	0.685027	3.49374	0.0989452	0.440217	2.08105	0.303086	0.660132
circENSSSCG00000009495.2	chr11	70434368	70440107	-	3	ENSSSCT00000010412.2	ENSSSCG00000009495.2	5,4,3	chr11:70417821-70434368|chr11:70440107-70440141	0	0	3	4	0	2	5	3	4	0	2	1	0	0	453.383	481.405	0	234.142	387.276	364.096	531.576	0	581.441	242.262	-0.168571	0.883286	1	-0.957706	0.354291	0.73939	-0.18266	0.869531	1	0.606475	0.558834	0.802233
circENSSSCG00000009543.2	chr11	83475286	83512486	+	6	ENSSSCT00000010461.2	ENSSSCG00000009543.2	6,7,8,9,10,11	chr11:83455085-83475286|chr11:83512486-83523821	0	0	1	3	1	1	0	0	1	0	1	0	0	0	151.128	361.054	116.637	117.071	0	0	132.894	0	290.72	0	-1.25477	0.379255	0.740828	0.703884	0.648021	0.914597	0.972683	0.501495	0.713806	-0.985972	0.544149	0.787899
circENSSSCG00000009543.2_2	chr11	83475286	83523969	+	7	ENSSSCT00000010461.2	ENSSSCG00000009543.2	6,7,8,9,10,11,12	chr11:83455085-83475286|chr11:83523969-83554917	0	1	0	0	1	5	1	1	0	0	0	0	0	317.991	0	0	116.637	585.355	77.4553	121.365	0	0	0	0	-1.25986	0.463352	0.784954	0.28049	0.885899	1	3.72955	0.0898939	0.427861	2.1892	0.296713	0.656761
circENSSSCG00000009551.2	chr11	84960154	84965034	+	2	ENSSSCT00000010470.2	ENSSSCG00000009551.2	3,4	chr11:84954039-84960154|chr11:84965034-84974407	0	0	0	0	0	4	0	0	0	0	0	0	0	0	0	0	0	468.284	0	0	0	0	0	0	-3.19731	0.199911	0.649073	0	1	1	3.19731	0.218821	0.541331	0	1	1
circENSSSCG00000009583.2	chr14	948862	949498	-	2	ENSSSCT00000010504.2	ENSSSCG00000009583.2	4,3	chr14:946945-948862|chr14:949498-956118	0	0	3	1	2	1	4	2	0	0	2	0	0	0	453.383	120.351	233.274	117.071	309.821	242.731	0	0	581.441	0	0.306192	0.804346	0.979864	0.019511	0.983567	1	-0.206909	0.881148	1	0.0797724	0.948639	1
circENSSSCG00000009624.2	chr14	7197259	7202575	+	4	ENSSSCT00000010550.2	ENSSSCG00000009624.2	7,8,9,10	chr14:7194022-7197259|chr14:7202575-7213491	0	0	1	5	1	6	0	1	0	0	0	1	0	0	151.128	601.756	116.637	702.427	0	121.365	0	0	0	242.262	-2.44605	0.0696336	0.52478	0.707737	0.649346	0.915696	2.19062	0.108609	0.451689	-0.963175	0.55393	0.797241
circENSSSCG00000009652.2	chr14	10633684	10635146	-	3	ENSSSCT00000010582.2	ENSSSCG00000009652.2	9,8,7	chr14:10615695-10633684|chr14:10635146-10662185	7	0	8	16	8	9	16	3	2	0	1	2	2004.21	0	1209.02	1925.62	933.097	1053.64	1239.28	364.096	265.788	0	290.72	484.524	-0.237828	0.746744	0.953584	0.718457	0.345146	0.732063	2.20298	0.0183847	0.244063	1.2467	0.200646	0.608107
circENSSSCG00000009652.2_2	chr14	10633684	10670593	-	8	ENSSSCT00000010582.2	ENSSSCG00000009652.2	9,8,7,6,5,4,3,2	chr14:10615695-10633684|chr14:10670593-10682291	1	1	3	13	11	10	3	5	7	0	0	2	286.316	317.991	453.383	1564.57	1283.01	1170.71	232.366	606.827	930.259	0	0	484.524	-1.79099	0.011488	0.351883	-0.530931	0.503177	0.815292	2.77611	0.00126378	0.0784482	1.51604	0.119778	0.572872
circENSSSCG00000009818.3	chr14	33388047	33391511	+	2	ENSSSCT00000010761.3	ENSSSCG00000009818.3	4,5	chr14:33387362-33388047|chr14:33391511-33395789	0	0	0	1	1	0	1	1	0	0	0	0	0	0	0	120.351	116.637	0	77.4553	121.365	0	0	0	0	-2.35807	0.305289	0.699078	-2.17411	0.330105	0.719843	2.35807	0.3292	0.61293	2.17411	0.354927	0.681666
circENSSSCG00000009924.2	chr14	43482273	43487878	-	3	ENSSSCT00000010875.2	ENSSSCG00000009924.2	8,7,6	chr14:43481006-43482273|chr14:43487878-43488701	0	0	1	0	2	3	2	1	5	0	0	0	0	0	151.128	0	233.274	351.213	154.911	121.365	664.47	0	0	0	-1.27611	0.409241	0.753053	-1.85896	0.217275	0.659311	3.48936	0.0905306	0.427861	4.07221	0.0444613	0.461202
circENSSSCG00000010164.2	chr14	61599944	61600727	-	2	ENSSSCT00000011130.2	ENSSSCG00000010164.2	10,9	chr14:61599134-61599944|chr14:61600727-61603584	0	0	0	2	3	0	1	1	1	0	0	0	0	0	0	240.703	349.911	0	77.4553	121.365	132.894	0	0	0	-3.49689	0.065468	0.52478	-2.72263	0.154279	0.611924	3.49689	0.0830955	0.415661	2.72263	0.182463	0.606245
circENSSSCG00000010195.2	chr14	65584883	65585370	-	2	ENSSSCT00000011161.2	ENSSSCG00000010195.2	3,2	chr14:65579033-65584883|chr14:65585370-65630672	0	2	3	2	1	5	2	0	0	0	0	1	0	635.982	453.383	240.703	116.637	585.355	154.911	0	0	0	0	242.262	0.219315	0.838979	0.996861	2.21191	0.0736104	0.498469	1.62858	0.245025	0.563265	-0.364012	0.821946	0.984756
circENSSSCG00000010401.2	chr14	98634789	98637141	+	2	ENSSSCT00000011385.2	ENSSSCG00000010401.2	3,4	chr14:98626413-98634789|chr14:98637141-98639194	0	0	1	3	0	1	0	0	0	0	0	0	0	0	151.128	361.054	0	117.071	0	0	0	0	0	0	-1.1188	0.595012	0.883635	2.10021	0.210904	0.656407	3.21901	0.182052	0.508992	0	1	1
circENSSSCG00000010401.2_2	chr14	98659350	98661484	+	2	ENSSSCT00000011385.2	ENSSSCG00000010401.2	18,19	chr14:98657258-98659350|chr14:98661484-98666674	2	0	0	4	3	4	5	1	6	0	1	1	572.633	0	0	481.405	349.911	468.284	387.276	121.365	797.364	0	290.72	242.262	-1.35249	0.20846	0.651837	-1.32964	0.214244	0.658246	1.18271	0.276943	0.565699	1.15987	0.284417	0.653437
circENSSSCG00000010685.2	chr14	140971849	140973395	-	5	ENSSSCT00000011686.2	ENSSSCG00000010685.2	11,10,9,8,7	chr14:140970257-140971849|chr14:140973395-140974849	0	0	1	1	0	0	1	4	0	0	2	0	0	0	151.128	120.351	0	0	77.4553	485.461	0	0	581.441	0	0.530013	0.762393	0.959133	-1.26686	0.487204	0.809934	-1.81435	0.317488	0.602766	-0.017481	0.992201	1
circENSSSCG00000010706.3	chr14	143705042	143706167	-	2	ENSSSCT00000033498.1	ENSSSCG00000010706.3	8,7	chr14:143704285-143705042|chr14:143706167-143707064	2	2	5	0	1	0	8	5	2	0	0	0	572.633	635.982	755.639	0	116.637	0	619.642	606.827	265.788	0	0	0	3.56601	0.000611712	0.140868	0.374781	0.590922	0.883764	1.61152	0.396882	0.666549	4.80275	0.00311821	0.183373
circENSSSCG00000010934.2	chr10	29531219	29536990	+	2	ENSSSCT00000011966.2	ENSSSCG00000010934.2	4,5	chr10:29520194-29531219|chr10:29536990-29538149	0	0	0	0	0	0	4	0	0	0	0	0	0	0	0	0	0	0	309.821	0	0	0	0	0	0	1	1	-2.73845	0.260467	0.679981	0	1	1	2.73845	0.281642	0.651471
circENSSSCG00000010957.2	chr10	33646092	33649475	+	2	ENSSSCT00000011993.2	ENSSSCG00000010957.2	22,23	chr10:33640125-33646092|chr10:33649475-33665932	0	0	2	0	2	1	2	2	0	0	2	0	0	0	302.256	0	233.274	117.071	154.911	242.731	0	0	581.441	0	0.152227	0.910132	1	-0.03209	0.988419	1	-0.582696	0.696906	0.875193	-0.398379	0.786917	0.967428
circENSSSCG00000010987.2	chr10	37120501	37123936	-	3	ENSSSCT00000012026.2	ENSSSCG00000010987.2	6,5,4	chr10:37118369-37120501|chr10:37123936-37127267	0	0	0	0	0	0	3	0	0	0	0	0	0	0	0	0	0	0	232.366	0	0	0	0	0	0	1	1	-2.39927	0.31381	0.708347	0	1	1	2.39927	0.336125	0.672453
circENSSSCG00000010987.2_2	chr10	37120501	37131391	-	5	ENSSSCT00000012026.2	ENSSSCG00000010987.2	6,5,4,3,2	chr10:37118369-37120501|chr10:37131391-37135902	0	1	3	2	1	0	1	1	1	0	0	0	0	317.991	453.383	240.703	116.637	0	77.4553	121.365	132.894	0	0	0	1.16133	0.307006	0.700533	1.29416	0.253051	0.678582	2.84483	0.153232	0.498604	2.712	0.172135	0.601796
circENSSSCG00000010987.2_3	chr10	37123722	37131391	-	3	ENSSSCT00000012026.2	ENSSSCG00000010987.2	4,3,2	chr10:37121632-37123722|chr10:37131391-37135902	2	0	1	2	2	3	2	1	0	0	0	2	572.633	0	151.128	240.703	233.274	351.213	154.911	121.365	0	0	0	484.524	-0.238286	0.820522	0.988848	1.04283	0.375153	0.757994	0.58065	0.614614	0.81721	-0.700463	0.583375	0.820436
circENSSSCG00000011025.3	chr10	46681559	46779066	+	5	ENSSSCT00000035562.1	ENSSSCG00000011025.3	2,3,4,5,6	chr10:46547317-46681559|chr10:46779066-46793600	0	1	2	1	4	3	0	0	0	0	0	1	0	317.991	302.256	120.351	466.549	351.213	0	0	0	0	0	242.262	-0.482892	0.679917	0.938279	3.63796	0.0169243	0.333888	1.62511	0.246865	0.563686	-2.49574	0.122372	0.572872
circENSSSCG00000011025.3_2	chr10	46711918	46720028	+	2	ENSSSCT00000012067.2	ENSSSCG00000011025.3	2,3	chr10:46681760-46711918|chr10:46720028-46726603	0	0	0	0	0	0	3	0	0	0	0	0	0	0	0	0	0	0	232.366	0	0	0	0	0	0	1	1	-2.39927	0.31381	0.708347	0	1	1	2.39927	0.336125	0.672453
circENSSSCG00000011025.3_3	chr10	46711918	46779066	+	4	ENSSSCT00000012067.2	ENSSSCG00000011025.3	2,3,4,5	chr10:46681760-46711918|chr10:46779066-46793600	1	1	1	0	3	2	1	1	0	0	0	0	286.316	317.991	151.128	0	349.911	234.142	77.4553	121.365	0	0	0	0	0.232207	0.84228	0.996861	1.51796	0.233226	0.668755	3.49139	0.0732712	0.394405	2.20564	0.265984	0.649838
circENSSSCG00000011025.3_4	chr10	46726603	46779066	+	2	ENSSSCT00000035562.1	ENSSSCG00000011025.3	5,6	chr10:46720028-46726603|chr10:46779066-46793600	0	2	0	4	1	3	4	1	1	1	0	0	0	635.982	0	481.405	116.637	351.213	309.821	121.365	132.894	284.243	0	0	-0.866208	0.465665	0.78497	-0.253675	0.829519	1	1.606	0.237178	0.557553	0.993472	0.477752	0.745543
circENSSSCG00000011035.2	chr10	48609498	48609985	-	3	ENSSSCT00000012078.2	ENSSSCG00000011035.2	4,3,2	chr10:48598913-48609498|chr10:48609985-48619577	0	0	0	0	0	0	3	2	1	0	0	1	0	0	0	0	0	0	232.366	242.731	132.894	0	0	242.262	0	1	1	-3.56291	0.0461772	0.437012	-2.50286	0.130199	0.472834	1.06006	0.437787	0.729046
circENSSSCG00000011072.2	chr10	55803598	55808258	+	2	ENSSSCT00000012116.2	ENSSSCG00000011072.2	2,3	chr10:55788005-55803598|chr10:55808258-55891452	0	0	0	0	0	0	2	0	0	0	0	0	0	0	0	0	0	0	154.911	0	0	0	0	0	0	1	1	-1.95433	0.385479	0.764073	0	1	1	1.95433	0.408842	0.729046
circENSSSCG00000011163.2	chr10	76035339	76089926	+	4	ENSSSCT00000012225.2	ENSSSCG00000011163.2	3,4,5,6	chr10:76033820-76035339|chr10:76089926-76099307	4	0	0	5	1	0	5	0	0	0	0	0	1145.27	0	0	601.756	116.637	0	387.276	0	0	0	0	0	0.588858	0.75631	0.9563	1.29958	0.494133	0.812363	3.754	0.121972	0.460419	3.04328	0.19261	0.606976
circENSSSCG00000011171.2	chr10	77000879	77001883	+	2	ENSSSCT00000012233.2	ENSSSCG00000011171.2	6,7	chr10:77000185-77000879|chr10:77001883-77003101	1	4	11	3	5	1	17	2	8	0	2	2	286.316	1271.96	1662.41	361.054	583.186	117.071	1316.74	242.731	1063.15	0	581.441	484.524	1.6239	0.039322	0.45914	0.331436	0.640626	0.908744	-0.0212192	0.982488	1	1.27124	0.148458	0.582707
circENSSSCG00000011183.3	chr13	1146626	1164999	-	6	ENSSSCT00000012246.2	ENSSSCG00000011183.3	17,16,15,14,13,12	chr13:1141589-1146626|chr13:1164999-1167946	0	0	0	0	0	0	1	0	1	0	0	0	0	0	0	0	0	0	77.4553	0	132.894	0	0	0	0	1	1	-2.21918	0.349029	0.733049	0	1	1	2.21918	0.371665	0.698771
circENSSSCG00000011183.3	chr13	1121458	1124482	-	4	ENSSSCT00000012246.2	ENSSSCG00000011183.3	27,26,25,24	chr13:1119698-1121458|chr13:1124482-1125745	1	0	1	3	4	1	2	2	1	4	0	0	286.316	0	151.128	361.054	466.549	117.071	154.911	242.731	132.894	1136.97	0	0	-0.979842	0.41665	0.758616	-0.202033	0.873365	1	-0.211542	0.845625	0.985527	-0.989351	0.383087	0.709467
circENSSSCG00000011222.2	chr13	18138044	18153485	-	3	ENSSSCT00000012289.2	ENSSSCG00000011222.2	5,4,3	chr13:18089153-18138044|chr13:18153485-18176000	1	1	2	7	0	1	3	0	0	0	0	0	286.316	317.991	302.256	842.459	0	117.071	232.366	0	0	0	0	0	-0.072689	0.959429	1	1.56137	0.296455	0.701987	4.14224	0.0529713	0.367604	2.50819	0.230255	0.62394
circENSSSCG00000011226.3	chr13	18707839	18710434	-	2	ENSSSCT00000035130.1	ENSSSCG00000011226.3	2,1	None|None	1	0	1	3	3	3	2	1	1	0	1	1	286.316	0	151.128	361.054	349.911	351.213	154.911	121.365	132.894	0	290.72	242.262	-1.13477	0.251169	0.651868	0.101316	0.928759	1	0.903685	0.370399	0.637361	-0.332396	0.77327	0.959824
circENSSSCG00000011245.2	chr13	24353501	24371577	+	4	ENSSSCT00000012312.2	ENSSSCG00000011245.2	2,3,4,5	chr13:24349108-24353501|chr13:24371577-24516456	1	1	2	0	0	0	3	0	0	0	0	0	286.316	317.991	302.256	0	0	0	232.366	0	0	0	0	0	4.06943	0.0142355	0.361575	1.53852	0.269598	0.685027	0	1	1	2.53091	0.218123	0.616484
circENSSSCG00000011253.2	chr13	25277844	25281339	+	3	ENSSSCT00000012320.2	ENSSSCG00000011253.2	24,25,26	chr13:25274789-25277844|chr13:25281339-25283482	0	0	1	0	0	2	2	0	0	0	0	0	0	0	151.128	0	0	234.142	154.911	0	0	0	0	0	-0.292961	0.907961	1	0.079211	0.96848	1	2.34742	0.329505	0.61293	1.97524	0.380989	0.709467
circENSSSCG00000011425.2	chr13	37111090	37113036	-	2	ENSSSCT00000012505.2	ENSSSCG00000011425.2	13,12	chr13:37108993-37111090|chr13:37113036-37114185	1	0	2	2	1	1	4	5	4	0	0	0	286.316	0	302.256	240.703	116.637	117.071	309.821	606.827	531.576	0	0	0	0.457115	0.668024	0.934175	-0.994097	0.270905	0.685027	3.20677	0.0942827	0.43226	4.65798	0.00509857	0.237367
circENSSSCG00000011540.2	chr13	72897240	72903860	+	6	ENSSSCT00000012630.2	ENSSSCG00000011540.2	8,9,10,11,12,13	chr13:72895578-72897240|chr13:72903860-72914295	0	1	0	0	0	2	6	1	0	0	1	0	0	317.991	0	0	0	234.142	464.732	121.365	0	0	290.72	0	0.135514	0.950902	1	-1.07521	0.540007	0.84717	-0.19912	0.916446	1	1.01161	0.569572	0.809671
circENSSSCG00000011542.2	chr13	72865580	72866992	+	2	ENSSSCT00000012632.2	ENSSSCG00000011542.2	2,3	chr13:72864087-72865580|chr13:72866992-72876874	0	0	0	2	1	0	3	1	2	2	0	0	0	0	0	240.703	116.637	0	232.366	121.365	265.788	568.485	0	0	-2.8456	0.130894	0.602346	-3.56819	0.0510848	0.443552	-0.552977	0.680821	0.863456	0.169609	0.891512	1
circENSSSCG00000011542.2_2	chr13	72865580	72879916	+	4	ENSSSCT00000012632.2	ENSSSCG00000011542.2	2,3,4,5	chr13:72864087-72865580|chr13:72879916-72881853	0	2	0	0	0	0	3	0	0	0	0	0	0	635.982	0	0	0	0	232.366	0	0	0	0	0	3.56559	0.247377	0.651868	1.1998	0.753434	0.96708	0	1	1	2.36579	0.425901	0.729046
circENSSSCG00000011553.2	chr13	73190425	73192256	+	2	ENSSSCT00000012643.2	ENSSSCG00000011553.2	10,11	chr13:73184566-73190425|chr13:73192256-73198102	1	0	12	7	4	4	2	3	0	1	0	0	286.316	0	1813.53	842.459	466.549	468.284	154.911	364.096	0	284.243	0	0	0.428258	0.642328	0.918159	2.08693	0.0407955	0.435499	2.47241	0.0628899	0.383942	0.813739	0.577138	0.815847
circENSSSCG00000011632.2	chr13	81420906	81425070	-	5	ENSSSCT00000012730.2	ENSSSCG00000011632.2	16,15,14,13,12	chr13:81417416-81420906|chr13:81425070-81425594	0	0	3	2	7	0	1	2	1	0	0	0	0	0	453.383	240.703	816.46	0	77.4553	242.731	132.894	0	0	0	-0.828506	0.550238	0.849884	0.336888	0.804666	0.993093	4.28166	0.0392669	0.33183	3.11627	0.140539	0.578381
circENSSSCG00000011632.2_2	chr13	81426922	81435317	-	4	ENSSSCT00000012730.2	ENSSSCG00000011632.2	10,9,8,7	chr13:81425709-81426922|chr13:81435317-81437152	1	0	6	1	1	1	2	4	5	0	0	0	286.316	0	906.767	120.351	116.637	117.071	154.911	485.461	664.47	0	0	0	1.82805	0.0965594	0.57592	0.163689	0.861075	1	2.84212	0.157842	0.502947	4.50649	0.0145928	0.324081
circENSSSCG00000011765.2	chr13	126886355	126896290	+	6	ENSSSCT00000012876.2	ENSSSCG00000011765.2	4,5,6,7,8,9	chr13:126878039-126886355|chr13:126896290-126910941	0	0	0	4	0	2	3	2	4	1	1	1	0	0	0	481.405	0	234.142	232.366	242.731	531.576	284.243	290.72	242.262	-3.74299	0.0359294	0.45914	-4.1658	0.0159069	0.33118	-0.180467	0.870815	1	0.242338	0.820951	0.984756
circENSSSCG00000011765.2_2	chr13	126893677	126894393	+	2	ENSSSCT00000012876.2	ENSSSCG00000011765.2	7,8	chr13:126889519-126893677|chr13:126894393-126896136	1	1	0	0	1	0	2	1	1	0	0	0	286.316	317.991	0	0	116.637	0	154.911	121.365	132.894	0	0	0	1.60937	0.261872	0.654173	0.175893	0.890287	1	1.61092	0.399415	0.666549	3.0444	0.118612	0.572872
circENSSSCG00000011765.2_3	chr13	126893677	126896290	+	3	ENSSSCT00000012876.2	ENSSSCG00000011765.2	7,8,9	chr13:126889519-126893677|chr13:126896290-126910941	0	0	3	2	2	3	3	2	0	0	0	0	0	0	453.383	240.703	233.274	351.213	232.366	242.731	0	0	0	0	-0.375524	0.735898	0.950254	0.271451	0.807605	0.993625	3.9441	0.036549	0.325503	3.29712	0.0900191	0.533236
circENSSSCG00000011772.2	chr13	130082228	130090279	+	3	ENSSSCT00000012884.2	ENSSSCG00000011772.2	3,4,5	chr13:130081941-130082228|chr13:130090279-130101829	0	0	1	6	4	2	5	1	1	0	0	1	0	0	151.128	722.108	466.549	234.142	387.276	121.365	132.894	0	0	242.262	-2.41634	0.0463243	0.477781	-1.44918	0.264164	0.683349	2.18156	0.0776975	0.405673	1.2144	0.359665	0.686143
circENSSSCG00000012000.2	chr13	184052538	184059739	+	4	ENSSSCT00000013131.2	ENSSSCG00000012000.2	2,3,4,5	chr13:184018699-184052538|chr13:184059739-184110218	0	0	1	5	3	1	3	0	2	0	1	0	0	0	151.128	601.756	349.911	117.071	232.366	0	265.788	0	290.72	0	-2.0409	0.126143	0.602346	-1.05881	0.454086	0.797092	1.76378	0.193274	0.521622	0.781681	0.585648	0.821276
circENSSSCG00000012089.2	chr13	217642116	217648492	-	7	ENSSSCT00000013223.2	ENSSSCG00000012089.2	9,8,7,6,5,4,3	chr13:217641370-217642116|chr13:217648492-217651890	0	0	0	3	0	0	5	0	1	0	0	0	0	0	0	361.054	0	0	387.276	0	132.894	0	0	0	-2.86035	0.203839	0.649495	-3.3732	0.144243	0.603499	2.86035	0.226739	0.549895	3.3732	0.162774	0.599579
circENSSSCG00000012178.2	chrY	1283551	1288062	+	5	ENSSSCT00000013322.2	ENSSSCG00000012178.2	5,6,7,8,9	chrY:1279930-1283551|chrY:1288062-1289580	0	0	2	0	0	2	1	0	2	0	0	0	0	0	302.256	0	0	234.142	77.4553	0	265.788	0	0	0	0.536237	0.763587	0.959219	0.114578	0.940941	1	2.34878	0.288599	0.574588	2.77044	0.223409	0.619333
circENSSSCG00000012179.2	chrY	1361221	1367464	+	2	ENSSSCT00000013323.2	ENSSSCG00000012179.2	2,3	chrY:1325214-1361221|chrY:1367464-1379529	0	0	4	13	3	4	9	5	1	0	0	0	0	0	604.511	1564.57	349.911	468.284	697.097	606.827	132.894	0	0	0	-1.52019	0.148725	0.620674	-0.855545	0.424968	0.783793	5.40713	0.00234198	0.117169	4.74249	0.0100546	0.285184
circENSSSCG00000012434.3	chrX	70495252	70498760	-	3	ENSSSCT00000013595.2	ENSSSCG00000012434.3	17,16,15	chrX:70475483-70495252|chrX:70498760-70506112	2	1	4	3	3	2	12	10	1	0	4	0	572.633	317.991	604.511	361.054	349.911	234.142	929.463	1213.65	132.894	0	1162.88	0	0.680964	0.465204	0.78497	-0.566029	0.506946	0.818537	-0.215013	0.834473	0.979053	1.03198	0.268592	0.651471
circENSSSCG00000012434.3_2	chrX	70495252	70509324	-	7	ENSSSCT00000013595.2	ENSSSCG00000012434.3	17,16,15,14,13,12,11	chrX:70475483-70495252|chrX:70509324-70638359	1	1	10	2	3	1	7	5	2	0	1	0	286.316	317.991	1511.28	240.703	349.911	117.071	542.187	606.827	265.788	0	290.72	0	1.70026	0.0478484	0.480548	0.732349	0.347491	0.732063	1.21482	0.36521	0.632981	2.18273	0.0741087	0.510087
circENSSSCG00000012434.3_3	chrX	70638359	70639982	-	2	ENSSSCT00000013595.2	ENSSSCG00000012434.3	10,9	chrX:70509324-70638359|chrX:70639982-70646171	0	0	0	4	3	2	6	2	0	0	0	0	0	0	0	481.405	349.911	234.142	464.732	242.731	0	0	0	0	-4.28881	0.0169107	0.372925	-3.84365	0.0344892	0.411416	4.28881	0.0241266	0.280807	3.84365	0.046752	0.461487
circENSSSCG00000012434.3_4	chrX	70638359	70664153	-	6	ENSSSCT00000013595.2	ENSSSCG00000012434.3	10,9,8,7,6,5	chrX:70509324-70638359|chrX:70664153-70669287	1	2	0	5	6	1	10	4	3	0	0	1	286.316	635.982	0	601.756	699.823	117.071	774.553	485.461	398.682	0	0	242.262	-0.897117	0.370329	0.739279	-1.15649	0.235171	0.670888	2.17993	0.0790135	0.40678	2.4393	0.0429571	0.454234
circENSSSCG00000012634.2	chrX	114567035	114570719	-	5	ENSSSCT00000013815.2	ENSSSCG00000012634.2	6,5,4,3,2	chrX:114552590-114567035|chrX:114570719-114571116	0	0	0	0	3	0	1	0	0	0	0	0	0	0	0	0	349.911	0	77.4553	0	0	0	0	0	-2.83028	0.243924	0.651868	-1.32616	0.47221	0.804873	2.83028	0.265094	0.564331	1.32616	0.498734	0.764058
circENSSSCG00000012881.2	chr2	2833538	2834743	-	2	ENSSSCT00000014080.2	ENSSSCG00000012881.2	5,4	chr2:2830716-2833538|chr2:2834743-2835643	0	0	0	2	2	4	0	0	1	0	0	0	0	0	0	240.703	233.274	468.284	0	0	132.894	0	0	0	-4.12423	0.0215078	0.401513	-1.54073	0.385704	0.764073	4.12423	0.0303332	0.303514	1.54073	0.419753	0.729046
circENSSSCG00000013054.2	chr2	7628882	7630825	+	3	ENSSSCT00000014268.2	ENSSSCG00000013054.2	5,6,7	chr2:7618409-7628882|chr2:7630825-7640656	0	1	6	4	9	5	5	1	4	0	3	6	0	317.991	906.767	481.405	1049.73	585.355	387.276	121.365	531.576	0	872.161	1453.57	-0.525924	0.524186	0.832625	0.460545	0.595888	0.886166	-0.168886	0.830337	0.977042	-1.15536	0.169386	0.601796
circENSSSCG00000013223.2	chr2	15903734	15906647	-	3	ENSSSCT00000014443.2	ENSSSCG00000013223.2	34,33,32	chr2:15902012-15903734|chr2:15906647-15907723	0	0	0	2	0	2	1	0	0	0	0	0	0	0	0	240.703	0	234.142	77.4553	0	0	0	0	0	-3.2115	0.139116	0.607976	-1.37732	0.434124	0.783793	3.2115	0.159833	0.503534	1.37732	0.464633	0.734227
circENSSSCG00000013249.2	chr2	17104711	17105711	+	3	ENSSSCT00000014469.2	ENSSSCG00000013249.2	8,9,10	chr2:17103835-17104711|chr2:17105711-17108059	0	0	0	0	0	0	0	2	1	0	0	3	0	0	0	0	0	0	0	242.731	132.894	0	0	726.785	0	1	1	-2.87922	0.216385	0.659311	-3.81018	0.0723507	0.393912	-0.930959	0.660118	0.882503
circENSSSCG00000013326.2	chr2	32233227	32239171	+	3	ENSSSCT00000014553.2	ENSSSCG00000013326.2	4,5,6	chr2:32231110-32233227|chr2:32239171-32246545	0	0	0	0	0	0	0	11	1	0	0	0	0	0	0	0	0	0	0	1335.02	132.894	0	0	0	0	1	1	-4.72272	0.0707223	0.495467	0	1	1	4.72272	0.0798506	0.519735
circENSSSCG00000013347.2	chr2	41866546	41885122	-	3	ENSSSCT00000014576.2	ENSSSCG00000013347.2	5,4,3	chr2:41837827-41866546|chr2:41885122-41888659	0	1	2	0	4	1	4	0	0	0	0	0	0	317.991	302.256	0	466.549	117.071	309.821	0	0	0	0	0	0.11927	0.939134	1	0.787665	0.623861	0.900204	3.48614	0.115839	0.456174	2.81775	0.192165	0.606976
circENSSSCG00000013384.2	chr2	45975765	45978876	+	2	ENSSSCT00000014618.2	ENSSSCG00000013384.2	2,3	chr2:45928729-45975765|chr2:45978876-46096294	1	3	9	5	6	5	27	7	6	2	5	5	286.316	953.973	1360.15	601.756	699.823	585.355	2091.29	849.557	797.364	568.485	1453.6	1211.31	0.556416	0.415516	0.757691	-0.46524	0.458628	0.799674	-0.762448	0.270664	0.564331	0.259208	0.682245	0.901413
circENSSSCG00000013402.2	chr2	50783411	50805720	-	9	ENSSSCT00000014642.2	ENSSSCG00000013402.2	12,11,10,9,8,7,6,5,4	chr2:50781297-50783411|chr2:50805720-50808045	0	0	0	0	0	0	5	2	0	0	0	0	0	0	0	0	0	0	387.276	242.731	0	0	0	0	0	1	1	-3.60823	0.142167	0.602161	0	1	1	3.60823	0.158515	0.596346
circENSSSCG00000013402.2_10	chr2	50802484	50805720	-	4	ENSSSCT00000014642.2	ENSSSCG00000013402.2	7,6,5,4	chr2:50800264-50802484|chr2:50805720-50808045	0	0	1	3	0	1	3	2	0	0	2	0	0	0	151.128	361.054	0	117.071	232.366	242.731	0	0	581.441	0	-1.01586	0.53211	0.83778	-1.06642	0.504312	0.815292	-0.205922	0.891197	1	-0.155361	0.9188	1
circENSSSCG00000013402.2_11	chr2	50802484	50808396	-	6	ENSSSCT00000014642.2	ENSSSCG00000013402.2	7,6,5,4,3,2	chr2:50800264-50802484|chr2:50808396-50825179	0	0	4	2	0	0	4	0	0	0	1	0	0	0	604.511	240.703	0	0	309.821	0	0	0	290.72	0	1.31212	0.501972	0.811316	0.911213	0.634839	0.905971	-0.190362	0.92912	1	0.210549	0.913444	1
circENSSSCG00000013402.2_2	chr2	50789561	50805720	-	7	ENSSSCT00000014642.2	ENSSSCG00000013402.2	10,9,8,7,6,5,4	chr2:50787219-50789561|chr2:50805720-50808045	1	0	1	7	3	1	5	2	1	0	0	0	286.316	0	151.128	842.459	349.911	117.071	387.276	242.731	132.894	0	0	0	-1.4233	0.226455	0.651868	-0.752164	0.53377	0.841183	4.56941	0.0132099	0.22716	3.89828	0.041443	0.450599
circENSSSCG00000013402.2_3	chr2	50789561	50808396	-	9	ENSSSCT00000014642.2	ENSSSCG00000013402.2	10,9,8,7,6,5,4,3,2	chr2:50787219-50789561|chr2:50808396-50825179	0	0	1	0	0	3	4	0	0	0	0	1	0	0	151.128	0	0	351.213	309.821	0	0	0	0	242.262	-0.742631	0.731544	0.949643	-0.674201	0.748606	0.964755	0.385907	0.858645	0.993502	0.317477	0.878224	1
circENSSSCG00000013402.2_4	chr2	50799142	50803783	-	5	ENSSSCT00000014642.2	ENSSSCG00000013402.2	9,8,7,6,5	chr2:50789769-50799142|chr2:50803783-50805552	1	0	0	1	2	2	7	2	0	0	0	0	286.316	0	0	120.351	233.274	234.142	542.187	242.731	0	0	0	0	-1.1105	0.460095	0.78088	-1.58238	0.276438	0.690504	3.49359	0.0868636	0.423608	3.96548	0.0463643	0.461487
circENSSSCG00000013402.2_5	chr2	50799142	50805720	-	6	ENSSSCT00000014642.2	ENSSSCG00000013402.2	9,8,7,6,5,4	chr2:50789769-50799142|chr2:50805720-50808045	0	0	3	0	0	1	7	1	2	0	0	0	0	0	453.383	0	0	117.071	542.187	121.365	265.788	0	0	0	1.86893	0.210541	0.651837	-0.671641	0.604263	0.891121	1.61006	0.408547	0.670375	4.15064	0.0391819	0.450599
circENSSSCG00000013402.2_6	chr2	50799142	50808396	-	8	ENSSSCT00000014642.2	ENSSSCG00000013402.2	9,8,7,6,5,4,3,2	chr2:50789769-50799142|chr2:50808396-50825179	0	0	0	0	3	4	0	2	0	0	0	0	0	0	0	0	349.911	468.284	0	242.731	0	0	0	0	-3.93377	0.094865	0.569987	-2.34445	0.273684	0.688731	3.93377	0.108791	0.451689	2.34445	0.300507	0.656925
circENSSSCG00000013402.2_7	chr2	50800151	50803783	-	4	ENSSSCT00000014642.2	ENSSSCG00000013402.2	8,7,6,5	chr2:50799247-50800151|chr2:50803783-50805552	2	0	6	6	13	0	19	11	5	1	1	1	572.633	0	906.767	722.108	1516.28	0	1471.65	1335.02	664.47	284.243	290.72	242.262	-0.417702	0.631609	0.91296	-1.05414	0.210109	0.656407	1.39965	0.166593	0.508066	2.03609	0.0370763	0.443875
circENSSSCG00000013402.2_8	chr2	50800151	50805720	-	5	ENSSSCT00000014642.2	ENSSSCG00000013402.2	8,7,6,5,4	chr2:50799247-50800151|chr2:50805720-50808045	6	2	3	5	0	2	9	10	2	0	1	1	1717.9	635.982	453.383	601.756	0	234.142	697.097	1213.65	265.788	0	290.72	242.262	1.62282	0.0712239	0.52478	0.284053	0.727875	0.954909	0.571742	0.62941	0.828015	1.91051	0.0739107	0.510087
circENSSSCG00000013402.2_9	chr2	50800151	50808396	-	7	ENSSSCT00000014642.2	ENSSSCG00000013402.2	8,7,6,5,4,3,2	chr2:50799247-50800151|chr2:50808396-50825179	0	0	7	1	2	0	1	1	2	0	0	0	0	0	1057.89	120.351	233.274	0	77.4553	121.365	265.788	0	0	0	1.64837	0.234869	0.651868	1.35409	0.318061	0.709813	2.84137	0.181593	0.508992	3.13566	0.141219	0.578381
circENSSSCG00000013409.2	chr2	52990681	53006824	+	5	ENSSSCT00000014649.2	ENSSSCG00000013409.2	16,17,18,19,20	chr2:52987392-52990681|chr2:53006824-53027250	1	0	1	0	5	2	0	0	0	0	0	0	286.316	0	151.128	0	583.186	234.142	0	0	0	0	0	0	-0.79696	0.613608	0.897662	3.13711	0.0637684	0.476373	3.93407	0.0711613	0.393433	0	1	1
circENSSSCG00000013870.2	chr2	60037166	60038197	+	3	ENSSSCT00000015152.2	ENSSSCG00000013870.2	6,7,8	chr2:60031225-60037166|chr2:60038197-60043009	0	0	2	6	3	2	1	1	2	4	0	0	0	0	302.256	722.108	349.911	234.142	77.4553	121.365	265.788	1136.97	0	0	-1.53234	0.210997	0.651837	-0.0758638	0.962959	1	0.226729	0.836947	0.980582	-1.22975	0.306272	0.662766
circENSSSCG00000013895.2	chr2	59237033	59238099	+	3	ENSSSCT00000015181.2	ENSSSCG00000013895.2	2,3,4	chr2:59234526-59237033|chr2:59238099-59239091	0	0	1	0	0	0	3	2	3	1	0	2	0	0	151.128	0	0	0	232.366	242.731	398.682	284.243	0	484.524	2.26738	0.153592	0.622196	-1.7197	0.181609	0.632206	-3.90622	0.0109803	0.213469	0.0808581	0.940663	1
circENSSSCG00000014101.2	chr2	88675452	88679052	-	3	ENSSSCT00000015403.2	ENSSSCG00000014101.2	5,4,3	chr2:88665259-88675452|chr2:88679052-88698665	0	0	0	1	1	1	3	2	1	0	0	0	0	0	0	120.351	116.637	117.071	232.366	242.731	132.894	0	0	0	-2.84206	0.114066	0.599738	-3.57558	0.0342431	0.409939	2.84206	0.142011	0.492775	3.57558	0.0493181	0.469643
circENSSSCG00000014159.2	chr2	104498555	104503990	-	2	ENSSSCT00000015467.2	ENSSSCG00000014159.2	4,3	chr2:104437775-104498555|chr2:104503990-104511430	0	0	1	1	0	0	3	2	0	0	0	0	0	0	151.128	120.351	0	0	232.366	242.731	0	0	0	0	0.576057	0.728597	0.949643	-1.06973	0.508611	0.818548	1.61798	0.410772	0.671007	3.26377	0.121133	0.572872
circENSSSCG00000014190.2	chr2	117898215	117922618	-	3	ENSSSCT00000015504.2	ENSSSCG00000014190.2	4,3,2	chr2:117785258-117898215|chr2:117922618-117935309	0	0	0	0	3	0	0	0	0	0	0	0	0	0	0	0	349.911	0	0	0	0	0	0	0	-2.83002	0.255536	0.651868	0	1	1	2.83002	0.276105	0.564331	0	1	1
circENSSSCG00000014191.2	chr2	118253396	118279349	+	2	ENSSSCT00000015505.2	ENSSSCG00000014191.2	2,3	chr2:118230969-118253396|chr2:118279349-118300507	0	0	0	0	1	0	3	8	0	2	0	0	0	0	0	0	116.637	0	232.366	970.923	0	568.485	0	0	-1.60728	0.390974	0.74499	-4.45274	0.0402539	0.433862	-1.81179	0.31743	0.602766	1.03367	0.538715	0.784095
circENSSSCG00000014191.2_2	chr2	118308149	118340199	+	4	ENSSSCT00000015505.2	ENSSSCG00000014191.2	5,6,7,8	chr2:118300681-118308149|chr2:118340199-118357060	0	0	0	3	0	0	0	0	0	0	0	0	0	0	0	361.054	0	0	0	0	0	0	0	0	-2.86269	0.251326	0.651868	0	1	1	2.86269	0.271747	0.564331	0	1	1
circENSSSCG00000014251.2	chr2	135565845	135574724	+	3	ENSSSCT00000015571.2	ENSSSCG00000014251.2	2,3,4	chr2:135507584-135565845|chr2:135574724-135610408	0	0	0	0	0	0	7	0	0	0	0	0	0	0	0	0	0	0	542.187	0	0	0	0	0	0	1	1	-3.39447	0.415795	0.779499	0	1	1	3.39447	0.426428	0.729046
circENSSSCG00000014267.2	chr2	139080931	139118827	-	10	ENSSSCT00000015589.2	ENSSSCG00000014267.2	12,11,10,9,8,7,6,5,4,3	chr2:139072165-139080931|chr2:139118827-139127906	0	0	0	0	3	0	0	2	0	0	0	0	0	0	0	0	349.911	0	0	242.731	0	0	0	0	-2.82876	0.351259	0.730496	-2.376	0.397668	0.768396	2.82876	0.367214	0.635623	2.376	0.415158	0.729046
circENSSSCG00000014267.2_2	chr2	139080931	139128038	-	11	ENSSSCT00000015589.2	ENSSSCG00000014267.2	12,11,10,9,8,7,6,5,4,3,2	chr2:139072165-139080931|chr2:139128038-139128084	2	2	0	3	2	1	2	2	0	0	0	0	572.633	635.982	0	361.054	233.274	117.071	154.911	242.731	0	0	0	0	0.508363	0.657685	0.9272	1.21919	0.304036	0.706225	3.74078	0.0556741	0.371965	3.02995	0.129423	0.574282
circENSSSCG00000014267.2_3	chr2	139097671	139128038	-	9	ENSSSCT00000015589.2	ENSSSCG00000014267.2	10,9,8,7,6,5,4,3,2	chr2:139087995-139097671|chr2:139128038-139128084	0	0	0	2	3	0	1	0	0	0	0	0	0	0	0	240.703	349.911	0	77.4553	0	0	0	0	0	-3.49724	0.105947	0.581337	-1.38249	0.431094	0.783793	3.49724	0.123827	0.463246	1.38249	0.461915	0.734227
circENSSSCG00000014343.2	chr2	147048492	147054323	+	9	ENSSSCT00000015671.2	ENSSSCG00000014343.2	4,5,6,7,8,9,10,11,12	chr2:147046734-147048492|chr2:147054323-147056941	0	0	0	1	2	1	4	0	6	3	4	0	0	0	0	120.351	233.274	117.071	309.821	0	797.364	852.728	1162.88	0	-3.20422	0.0967856	0.576244	-4.31699	0.0208803	0.357096	-1.93819	0.108712	0.451689	-0.825422	0.464151	0.734227
circENSSSCG00000014343.2_2	chr2	147049941	147051156	+	3	ENSSSCT00000015671.2	ENSSSCG00000014343.2	7,8,9	chr2:147049290-147049941|chr2:147051156-147052613	7	6	26	37	34	25	71	50	39	12	8	15	2004.21	1907.95	3929.32	4453	3965.66	2926.78	5499.32	6068.27	5182.87	3410.91	2325.76	3633.93	-0.410301	0.234895	0.651868	-0.971183	0.00319627	0.142852	0.262207	0.456137	0.689477	0.823089	0.0141296	0.322781
circENSSSCG00000014343.2_4	chr2	147049941	147054323	+	6	ENSSSCT00000015671.2	ENSSSCG00000014343.2	7,8,9,10,11,12	chr2:147049290-147049941|chr2:147054323-147056941	0	0	4	6	11	3	10	3	7	0	1	0	0	0	604.511	722.108	1283.01	351.213	774.553	364.096	930.259	0	290.72	0	-1.43471	0.10381	0.581337	-1.25528	0.156887	0.612742	2.87357	0.0123867	0.225653	2.69413	0.0202099	0.375528
circENSSSCG00000014343.2_5	chr2	147049941	147057770	+	8	ENSSSCT00000015671.2	ENSSSCG00000014343.2	7,8,9,10,11,12,13,14	chr2:147049290-147049941|chr2:147057770-147059768	0	0	3	7	4	8	4	0	0	0	0	1	0	0	453.383	842.459	466.549	936.569	309.821	0	0	0	0	242.262	-1.77601	0.0903432	0.562327	0.620794	0.603097	0.890956	2.8275	0.0250561	0.286648	0.43069	0.763721	0.953298
circENSSSCG00000014409.2	chr2	154050732	154058749	+	4	ENSSSCT00000015747.2	ENSSSCG00000014409.2	6,7,8,9	chr2:154048330-154050732|chr2:154058749-154061011	2	3	3	1	0	1	1	1	2	0	0	0	572.633	953.973	453.383	120.351	0	117.071	77.4553	121.365	265.788	0	0	0	2.71246	0.00766641	0.338129	1.98621	0.0308752	0.395014	2.35518	0.235201	0.555991	3.08143	0.111838	0.569761
circENSSSCG00000014440.2	chr2	157822104	157823042	+	2	ENSSSCT00000015786.2	ENSSSCG00000014440.2	7,8	chr2:157818404-157822104|chr2:157823042-157845325	1	7	11	7	8	3	17	3	7	0	3	1	286.316	2225.94	1662.41	842.459	933.097	351.213	1316.74	364.096	930.259	0	872.161	242.262	0.967653	0.168454	0.623023	0.640539	0.346826	0.732063	0.928473	0.298376	0.582503	1.25559	0.14687	0.579187
circENSSSCG00000014440.2_2	chr2	157845325	157846464	+	2	ENSSSCT00000015786.2	ENSSSCG00000014440.2	9,10	chr2:157823042-157845325|chr2:157846464-157849834	0	0	3	3	2	1	1	0	0	2	0	2	0	0	453.383	361.054	233.274	117.071	77.4553	0	0	568.485	0	484.524	-0.191466	0.873202	1	2.0929	0.124528	0.580904	-0.559126	0.612938	0.816277	-2.84349	0.0318333	0.437955
circENSSSCG00000014828.2	chr9	8935965	8946866	-	3	ENSSSCT00000016180.2	ENSSSCG00000014828.2	6,5,4	chr9:8930917-8935965|chr9:8946866-8948791	2	0	3	3	6	0	2	0	2	0	0	1	572.633	0	453.383	361.054	699.823	0	154.911	0	265.788	0	0	242.262	0.0261003	0.980686	1	1.26003	0.300665	0.70232	1.79409	0.215568	0.541331	0.560158	0.716902	0.922833
circENSSSCG00000014828.2_2	chr9	8935965	8950452	-	5	ENSSSCT00000016180.2	ENSSSCG00000014828.2	6,5,4,3,2	chr9:8930917-8935965|chr9:8950452-8987785	1	0	1	7	1	6	0	2	1	0	0	2	286.316	0	151.128	842.459	116.637	702.427	0	242.731	132.894	0	0	484.524	-1.75748	0.143381	0.61611	0.358914	0.786258	0.98341	1.55461	0.197303	0.525304	-0.56179	0.675434	0.896403
circENSSSCG00000014828.2_3	chr9	8944658	8950452	-	4	ENSSSCT00000016180.2	ENSSSCG00000014828.2	5,4,3,2	chr9:8936059-8944658|chr9:8950452-8987785	1	0	1	2	3	0	4	0	0	0	0	6	286.316	0	151.128	240.703	349.911	0	309.821	0	0	0	0	1453.57	-0.360801	0.824713	0.991167	0.314634	0.851201	1	-1.26661	0.399886	0.666549	-1.94205	0.203098	0.609866
circENSSSCG00000014884.2	chr9	13674797	13681977	-	3	ENSSSCT00000016238.2	ENSSSCG00000014884.2	14,13,12	chr9:13665222-13674797|chr9:13681977-13693437	0	0	0	0	3	3	0	0	0	0	0	2	0	0	0	0	349.911	351.213	0	0	0	0	0	484.524	-3.72714	0.104453	0.581337	0	1	1	0.429787	0.822685	0.973771	-3.29735	0.0777943	0.516679
circENSSSCG00000014884.2_2	chr9	13674797	13693595	-	4	ENSSSCT00000016238.2	ENSSSCG00000014884.2	14,13,12,11	chr9:13665222-13674797|chr9:13693595-13695826	0	0	1	0	0	1	2	0	0	0	0	0	0	0	151.128	0	0	117.071	154.911	0	0	0	0	0	0.444109	0.834797	0.995838	0.0778795	0.969184	1	1.60698	0.454863	0.689477	1.97321	0.38336	0.709467
circENSSSCG00000014891.2	chr9	13992619	13992920	-	1	ENSSSCT00000016246.2	ENSSSCG00000014891.2	2	chr9:13961967-13992619|chr9:13992920-14135331	0	0	2	1	1	5	1	1	2	2	1	0	0	0	302.256	120.351	116.637	585.355	77.4553	121.365	265.788	568.485	290.72	0	-0.897439	0.472037	0.790739	-0.0635476	0.969545	1	-0.00501558	0.997424	1	-0.838907	0.495657	0.764058
circENSSSCG00000014915.2	chr9	22394607	22399530	-	3	ENSSSCT00000016271.2	ENSSSCG00000014915.2	9,8,7	chr9:22384852-22394607|chr9:22399530-22402297	1	0	1	2	1	1	2	2	0	2	0	0	286.316	0	151.128	240.703	116.637	117.071	154.911	242.731	0	568.485	0	0	-0.0601606	0.961833	1	0.112366	0.928649	1	-0.187388	0.882205	1	-0.359914	0.776581	0.961618
circENSSSCG00000014915.2_2	chr9	22396992	22404468	-	5	ENSSSCT00000016271.2	ENSSSCG00000014915.2	8,7,6,5,4	chr9:22394713-22396992|chr9:22404468-22407688	0	3	4	2	0	5	4	2	0	0	0	0	0	953.973	604.511	240.703	0	585.355	309.821	242.731	0	0	0	0	0.872477	0.479186	0.795999	1.34015	0.28277	0.695411	3.94473	0.0547997	0.369595	3.47706	0.0918525	0.537871
circENSSSCG00000014915.2_3	chr9	22396992	22410483	-	7	ENSSSCT00000016271.2	ENSSSCG00000014915.2	8,7,6,5,4,3,2	chr9:22394713-22396992|chr9:22410483-22416945	0	2	4	0	2	1	1	4	0	0	0	0	0	635.982	604.511	0	233.274	117.071	77.4553	485.461	0	0	0	0	1.70259	0.218302	0.651868	1.13026	0.396087	0.767632	2.83559	0.179778	0.508992	3.40791	0.106388	0.558954
circENSSSCG00000014915.2_4	chr9	22402297	22404468	-	3	ENSSSCT00000016271.2	ENSSSCG00000014915.2	6,5,4	chr9:22399530-22402297|chr9:22404468-22407688	0	1	3	2	0	6	2	1	3	3	0	0	0	317.991	453.383	240.703	0	702.427	154.911	121.365	398.682	852.728	0	0	-0.161195	0.897466	1	0.328157	0.789226	0.985615	0.174214	0.890452	1	-0.315138	0.807775	0.979883
circENSSSCG00000014915.2_5	chr9	22402297	22407781	-	4	ENSSSCT00000016271.2	ENSSSCG00000014915.2	6,5,4,3	chr9:22399530-22402297|chr9:22407781-22410330	2	0	0	4	2	3	4	0	0	2	0	0	572.633	0	0	481.405	233.274	351.213	309.821	0	0	568.485	0	0	-0.990754	0.475692	0.793771	0.434618	0.776374	0.979453	0.881223	0.52842	0.740495	-0.544149	0.716063	0.922669
circENSSSCG00000014915.2_6	chr9	22402297	22410483	-	5	ENSSSCT00000016271.2	ENSSSCG00000014915.2	6,5,4,3,2	chr9:22399530-22402297|chr9:22410483-22416945	0	1	1	6	1	1	3	3	1	0	0	2	0	317.991	151.128	722.108	116.637	117.071	232.366	364.096	132.894	0	0	484.524	-0.975336	0.42434	0.762693	-0.623052	0.614261	0.895998	0.783413	0.524637	0.736426	0.43113	0.730536	0.932522
circENSSSCG00000014915.2_7	chr9	22407688	22410483	-	2	ENSSSCT00000016271.2	ENSSSCG00000014915.2	3,2	chr9:22404468-22407688|chr9:22410483-22416945	0	0	0	0	0	2	2	0	0	0	0	0	0	0	0	0	0	234.142	154.911	0	0	0	0	0	-2.34732	0.30973	0.702968	-1.97186	0.359566	0.744503	2.34732	0.333457	0.615072	1.97186	0.384977	0.709467
circENSSSCG00000015237.2	chr9	61784104	61808937	+	5	ENSSSCT00000016603.2	ENSSSCG00000015237.2	2,3,4,5,6	chr9:61716494-61784104|chr9:61808937-61810185	0	0	0	0	1	1	3	0	0	0	0	0	0	0	0	0	116.637	117.071	232.366	0	0	0	0	0	-2.34645	0.284311	0.677885	-2.43149	0.265478	0.683349	2.34645	0.310053	0.595927	2.43149	0.290761	0.653682
circENSSSCG00000015293.3	chr9	74572458	74573961	-	3	ENSSSCT00000016664.2	ENSSSCG00000015293.3	9,8,7	chr9:74571819-74572458|chr9:74573961-74579432	0	2	1	1	0	0	2	0	0	0	0	0	0	635.982	151.128	120.351	0	0	154.911	0	0	0	0	0	2.18929	0.222302	0.651868	1.76952	0.308083	0.708347	1.6204	0.420848	0.673516	2.04017	0.326067	0.672453
circENSSSCG00000015307.2	chr9	77414304	77428858	+	2	ENSSSCT00000016680.2	ENSSSCG00000015307.2	2,3	chr9:77278171-77414304|chr9:77428858-77469874	0	0	1	1	3	0	0	0	0	0	0	0	0	0	151.128	120.351	349.911	0	0	0	0	0	0	0	-1.0991	0.598141	0.88637	2.10311	0.209067	0.656407	3.20221	0.181804	0.508992	0	1	1
circENSSSCG00000015379.2	chr9	100028178	100038250	+	9	ENSSSCT00000016754.2	ENSSSCG00000015379.2	47,48,49,50,51,52,53,54,55	chr9:100026477-100028178|chr9:100038250-100053853	0	0	0	0	0	0	2	0	1	0	0	0	0	0	0	0	0	0	154.911	0	132.894	0	0	0	0	1	1	-2.60323	0.286603	0.69783	0	1	1	2.60323	0.308149	0.663701
circENSSSCG00000015509.2	chr9	129689964	129708229	-	3	ENSSSCT00000016896.2	ENSSSCG00000015509.2	8,7,6	chr9:129678106-129689964|chr9:129708229-129718278	0	0	5	0	2	0	0	0	1	0	0	0	0	0	755.639	0	233.274	0	0	0	132.894	0	0	0	1.585	0.481325	0.798131	2.27112	0.31757	0.709662	2.34433	0.324556	0.608774	1.65822	0.445374	0.732388
circENSSSCG00000015509.2_2	chr9	129708160	129724374	-	4	ENSSSCT00000016896.2	ENSSSCG00000015509.2	6,5,4,3	chr9:129691506-129708160|chr9:129724374-129732848	1	0	8	3	4	5	9	8	10	3	2	4	286.316	0	1209.02	361.054	466.549	585.355	697.097	970.923	1328.94	852.728	581.441	969.047	0.413613	0.564653	0.860165	-0.598342	0.360312	0.745073	-0.75506	0.296893	0.581639	0.256896	0.695023	0.907564
circENSSSCG00000015509.2_3	chr9	129708160	129732908	-	5	ENSSSCT00000016896.2	ENSSSCG00000015509.2	6,5,4,3,2	chr9:129691506-129708160|chr9:129732908-129763492	0	0	1	1	3	1	9	1	2	0	1	2	0	0	151.128	120.351	349.911	117.071	697.097	121.365	265.788	0	290.72	484.524	-1.23927	0.374874	0.740174	-2.1452	0.0959458	0.551409	-0.410618	0.724573	0.893587	0.495307	0.644633	0.867423
circENSSSCG00000015509.2_4	chr9	129718278	129724374	-	3	ENSSSCT00000016896.2	ENSSSCG00000015509.2	5,4,3	chr9:129708229-129718278|chr9:129724374-129732848	0	0	5	3	0	4	7	2	0	3	0	0	0	0	755.639	361.054	0	468.284	542.187	242.731	0	852.728	0	0	0.0990281	0.940347	1	0.111886	0.934068	1	-0.0112698	0.994538	1	-0.0241276	0.989203	1
circENSSSCG00000015509.2_5	chr9	129718278	129732908	-	4	ENSSSCT00000016896.2	ENSSSCG00000015509.2	5,4,3,2	chr9:129708229-129718278|chr9:129732908-129763492	0	0	5	4	7	5	11	0	4	0	2	0	0	0	755.639	481.405	816.46	585.355	852.008	0	531.576	0	581.441	0	-0.935678	0.387952	0.743944	-0.552485	0.612349	0.894673	1.67057	0.174443	0.508992	1.28738	0.298247	0.656925
circENSSSCG00000015531.2	chr9	133331934	133344356	-	5	ENSSSCT00000016919.2	ENSSSCG00000015531.2	10,9,8,7,6	chr9:133325209-133331934|chr9:133344356-133346032	4	0	2	0	3	2	6	0	3	0	1	0	1145.27	0	302.256	0	349.911	234.142	464.732	0	398.682	0	290.72	0	1.19848	0.321776	0.70681	0.64688	0.578424	0.873759	0.955609	0.532668	0.743341	1.50721	0.30803	0.663701
circENSSSCG00000015531.2_2	chr9	133335566	133344356	-	3	ENSSSCT00000016919.2	ENSSSCG00000015531.2	8,7,6	chr9:133332781-133335566|chr9:133344356-133346032	0	0	0	3	2	1	2	2	1	0	0	0	0	0	0	361.054	233.274	117.071	154.911	242.731	132.894	0	0	0	-3.73916	0.0302665	0.457043	-3.34359	0.0578901	0.460983	3.73916	0.0432108	0.337211	3.34359	0.0773791	0.515656
circENSSSCG00000015531.2_3	chr9	133341201	133344356	-	2	ENSSSCT00000016919.2	ENSSSCG00000015531.2	7,6	chr9:133335750-133341201|chr9:133344356-133346032	1	1	1	0	0	2	1	3	1	0	1	0	286.316	317.991	151.128	0	0	234.142	77.4553	364.096	132.894	0	290.72	0	1.37644	0.291467	0.680834	0.33163	0.778956	0.981089	-0.174914	0.91213	1	0.869895	0.546172	0.789124
circENSSSCG00000015645.2	chr9	73323018	73333601	+	3	ENSSSCT00000017041.2	ENSSSCG00000015645.2	14,15,16	chr9:73315654-73323018|chr9:73333601-73336209	0	0	0	3	0	0	0	0	0	0	0	0	0	0	0	361.054	0	0	0	0	0	0	0	0	-2.86269	0.251326	0.651868	0	1	1	2.86269	0.271747	0.564331	0	1	1
circENSSSCG00000015645.2_2	chr9	73323018	73336315	+	4	ENSSSCT00000017041.2	ENSSSCG00000015645.2	14,15,16,17	chr9:73315654-73323018|chr9:73336315-73347373	0	0	1	1	1	1	1	0	0	0	0	0	0	0	151.128	120.351	116.637	117.071	77.4553	0	0	0	0	0	-0.577474	0.690747	0.942654	0.798462	0.608428	0.893966	2.84211	0.153228	0.498604	1.46617	0.428098	0.729046
circENSSSCG00000015692.2	chr15	18687179	18702614	-	9	ENSSSCT00000017092.2	ENSSSCG00000015692.2	14,13,12,11,10,9,8,7,6	chr15:18684516-18687179|chr15:18702614-18707375	0	0	0	0	0	3	3	1	1	0	0	0	0	0	0	0	0	351.213	232.366	121.365	132.894	0	0	0	-2.83646	0.164928	0.622196	-3.27398	0.110739	0.562804	2.83646	0.190266	0.518093	3.27398	0.131161	0.574282
circENSSSCG00000015692.2_2	chr15	18728204	18730119	-	2	ENSSSCT00000017092.2	ENSSSCG00000015692.2	3,2	chr15:18707974-18728204|chr15:18730119-18802807	1	0	3	13	4	4	18	8	7	3	1	8	286.316	0	453.383	1564.57	466.549	468.284	1394.19	970.923	930.259	852.728	290.72	1938.09	-1.4556	0.0891646	0.562327	-1.87354	0.0234034	0.364875	-0.344591	0.626069	0.825564	0.0733464	0.914652	1
circENSSSCG00000015747.2	chr15	38098615	38105624	+	5	ENSSSCT00000017147.2	ENSSSCG00000015747.2	15,16,17,18,19	chr15:38098065-38098615|chr15:38105624-38105810	0	0	0	0	1	0	2	0	0	0	0	0	0	0	0	0	116.637	0	154.911	0	0	0	0	0	-1.60415	0.438949	0.766305	-1.96258	0.372477	0.755908	1.60415	0.463957	0.690317	1.96258	0.396862	0.720629
circENSSSCG00000015802.2	chr15	53796805	53800256	-	3	ENSSSCT00000017209.2	ENSSSCG00000015802.2	4,3,2	chr15:53795064-53796805|chr15:53800256-53822916	0	0	0	0	0	0	1	0	0	0	0	0	0	0	0	0	0	0	77.4553	0	0	0	0	0	0	1	1	-1.30103	0.499933	0.812694	0	1	1	1.30103	0.523585	0.774081
circENSSSCG00000015853.2	chr15	63799694	63819285	+	15	ENSSSCT00000017261.2	ENSSSCG00000015853.2	8,9,10,11,12,13,14,15,16,17,18,19,20,21,22	chr15:63792841-63799694|chr15:63819285-63821305	3	1	18	20	9	10	6	13	12	2	3	2	858.949	317.991	2720.3	2407.03	1049.73	1170.71	464.732	1577.75	1594.73	568.485	872.161	484.524	-0.106641	0.880117	1	0.271324	0.7009	0.943666	1.25267	0.118806	0.46014	0.874705	0.283432	0.652517
circENSSSCG00000015931.2	chr15	85002243	85009365	+	4	ENSSSCT00000017347.2	ENSSSCG00000015931.2	12,13,14,15	chr15:84993191-85002243|chr15:85009365-85014044	0	0	0	0	3	0	3	0	0	0	0	0	0	0	0	0	349.911	0	232.366	0	0	0	0	0	-2.82909	0.316769	0.704982	-2.37846	0.363326	0.748077	2.82909	0.334313	0.615072	2.37846	0.382657	0.709467
circENSSSCG00000015939.2	chr15	85325486	85340697	+	3	ENSSSCT00000017355.2	ENSSSCG00000015939.2	3,4,5	chr15:85318738-85325486|chr15:85340697-85345502	1	2	4	0	1	0	4	5	4	0	1	0	286.316	635.982	604.511	0	116.637	0	309.821	606.827	531.576	0	290.72	0	3.21508	0.00334008	0.2614	0.169234	0.820863	1	-0.907342	0.56735	0.777623	2.1385	0.0630774	0.494008
circENSSSCG00000015939.2_2	chr15	85340630	85346940	+	3	ENSSSCT00000017355.2	ENSSSCG00000015939.2	5,6,7	chr15:85326240-85340630|chr15:85346940-85355706	0	1	6	3	6	3	13	10	6	0	0	2	0	317.991	906.767	361.054	699.823	351.213	1006.92	1213.65	797.364	0	0	484.524	0.0804451	0.914855	1	-0.986727	0.157295	0.612742	1.30956	0.196233	0.524322	2.37673	0.00872379	0.272478
circENSSSCG00000015939.2_3	chr15	85340630	85357154	+	5	ENSSSCT00000017355.2	ENSSSCG00000015939.2	5,6,7,8,9	chr15:85326240-85340630|chr15:85357154-85364479	2	3	2	4	0	0	3	0	0	0	0	0	572.633	953.973	302.256	481.405	0	0	232.366	0	0	0	0	0	1.76835	0.206963	0.650936	2.47598	0.0836434	0.527339	3.22117	0.132586	0.477886	2.51354	0.227239	0.622599
circENSSSCG00000015939.2_4	chr15	85340630	85364566	+	6	ENSSSCT00000017355.2	ENSSSCG00000015939.2	5,6,7,8,9,10	chr15:85326240-85340630|chr15:85364566-85375262	2	0	2	0	1	3	4	5	2	2	0	0	572.633	0	302.256	0	116.637	351.213	309.821	606.827	265.788	568.485	0	0	0.857429	0.439182	0.766305	-0.359084	0.719031	0.950148	-0.192865	0.879337	1	1.02365	0.367025	0.695066
circENSSSCG00000016068.2	chr15	111197128	111198713	-	3	ENSSSCT00000017494.2	ENSSSCG00000016068.2	12,11,10	chr15:111184367-111197128|chr15:111198713-111210961	2	0	0	3	0	0	4	0	0	0	1	0	572.633	0	0	361.054	0	0	309.821	0	0	0	290.72	0	0.534718	0.806773	0.981603	0.637356	0.770388	0.97528	0.296849	0.893048	1	0.194212	0.924472	1
circENSSSCG00000016073.2	chr15	111901621	111910889	+	5	ENSSSCT00000017500.2	ENSSSCG00000016073.2	2,3,4,5,6	chr15:111897714-111901621|chr15:111910889-111914267	0	0	1	2	3	0	0	0	0	0	0	0	0	0	151.128	240.703	349.911	0	0	0	0	0	0	0	-1.37153	0.482018	0.798131	2.12576	0.195654	0.641969	3.49729	0.134967	0.482314	0	1	1
circENSSSCG00000016074.2	chr15	112201332	112260631	-	3	ENSSSCT00000017501.2	ENSSSCG00000016074.2	4,3,2	chr15:112180354-112201332|chr15:112260631-112388791	0	0	0	4	1	0	0	0	4	0	0	0	0	0	0	481.405	116.637	0	0	0	531.576	0	0	0	-3.51142	0.152238	0.622196	-3.31803	0.171725	0.62612	3.51142	0.16938	0.508992	3.31803	0.190373	0.606976
circENSSSCG00000016079.2	chr15	112569862	112581920	+	4	ENSSSCT00000017507.2	ENSSSCG00000016079.2	2,3,4,5	chr15:112565089-112569862|chr15:112581920-112590935	0	0	0	0	2	0	1	2	0	0	0	1	0	0	0	0	233.274	0	77.4553	242.731	0	0	0	242.262	-2.34636	0.257658	0.65279	-2.71534	0.200957	0.644091	-0.115231	0.950079	1	0.253749	0.896983	1
circENSSSCG00000016079.2_2	chr15	112575779	112581920	+	3	ENSSSCT00000017507.2	ENSSSCG00000016079.2	3,4,5	chr15:112569925-112575779|chr15:112581920-112590935	2	0	4	0	0	2	6	1	3	1	2	4	572.633	0	604.511	0	0	234.142	464.732	121.365	398.682	284.243	581.441	969.047	2.21318	0.0440061	0.471605	0.339404	0.705043	0.944566	-2.71948	0.0111728	0.215237	-0.845703	0.335231	0.672453
circENSSSCG00000016330.2	chr15	151787118	151798272	+	6	ENSSSCT00000017783.2	ENSSSCG00000016330.2	4,5,6,7,8,9	chr15:151783307-151787118|chr15:151798272-151800864	0	0	1	0	1	0	6	3	2	0	0	0	0	0	151.128	0	116.637	0	464.732	364.096	265.788	0	0	0	0.671534	0.663094	0.930724	-2.08918	0.0759331	0.5111	1.6113	0.397776	0.666549	4.37202	0.0116775	0.308212
circENSSSCG00000016330.2_2	chr15	151787118	151826943	+	16	ENSSSCT00000017783.2	ENSSSCG00000016330.2	4,5,6,7,8,9,10,11,12,13,14,15,16,17,18,19	chr15:151783307-151787118|chr15:151826943-151828079	0	0	0	0	0	0	2	0	3	0	0	0	0	0	0	0	0	0	154.911	0	398.682	0	0	0	0	1	1	-3.40348	0.187728	0.639087	0	1	1	3.40348	0.205032	0.609866
circENSSSCG00000016397.2	chr15	156940279	156945197	+	7	ENSSSCT00000017854.2	ENSSSCG00000016397.2	8,9,10,11,12,13,14	chr15:156939812-156940279|chr15:156945197-156946761	0	0	0	1	3	5	0	0	0	2	0	2	0	0	0	120.351	349.911	585.355	0	0	0	568.485	0	484.524	-4.281	0.0209492	0.401267	0	1	1	-0.0148186	0.98969	1	-4.29582	0.00546498	0.244248
circENSSSCG00000016397.2_2	chr15	156944191	156950335	+	6	ENSSSCT00000017854.2	ENSSSCG00000016397.2	13,14,15,16,17,18	chr15:156943845-156944191|chr15:156950335-156952649	0	0	1	0	0	1	3	5	1	0	0	0	0	0	151.128	0	0	117.071	232.366	606.827	132.894	0	0	0	0.623389	0.696858	0.94366	-1.91959	0.172321	0.62612	1.61052	0.404822	0.669209	4.15349	0.032517	0.437955
circENSSSCG00000016397.2_3	chr15	156946761	156988651	+	24	ENSSSCT00000017854.2	ENSSSCG00000016397.2	15,16,17,18,19,20,21,22,23,24,25,26,27,28,29,30,31,32,33,34,35,36,37,38	chr15:156945197-156946761|chr15:156988651-156989974	0	0	1	0	0	1	2	1	0	0	1	0	0	0	151.128	0	0	117.071	154.911	121.365	0	0	290.72	0	0.597545	0.715809	0.949028	-0.416081	0.797531	0.988905	-0.926517	0.595507	0.801985	0.0871089	0.952746	1
circENSSSCG00000016397.2_4	chr15	156959148	156988651	+	13	ENSSSCT00000017854.2	ENSSSCG00000016397.2	26,27,28,29,30,31,32,33,34,35,36,37,38	chr15:156958355-156959148|chr15:156988651-156989974	0	0	0	0	3	0	0	0	0	0	0	0	0	0	0	0	349.911	0	0	0	0	0	0	0	-2.83002	0.255536	0.651868	0	1	1	2.83002	0.276105	0.564331	0	1	1
circENSSSCG00000016397.2_5	chr15	156983575	156988651	+	5	ENSSSCT00000017854.2	ENSSSCG00000016397.2	34,35,36,37,38	chr15:156983349-156983575|chr15:156988651-156989974	0	0	0	2	3	2	9	2	5	1	0	2	0	0	0	240.703	349.911	234.142	697.097	242.731	664.47	284.243	0	484.524	-3.94414	0.0201729	0.397762	-4.88761	0.00145736	0.0841303	0.0319738	0.975214	1	0.975453	0.284629	0.653477
circENSSSCG00000016397.2_6	chr15	156986123	156992828	+	7	ENSSSCT00000017854.2	ENSSSCG00000016397.2	35,36,37,38,39,40,41	chr15:156983680-156986123|chr15:156992828-156994989	0	2	0	0	0	0	4	1	1	0	0	0	0	635.982	0	0	0	0	309.821	121.365	132.894	0	0	0	3.38937	0.0562018	0.498382	-0.0892909	0.946994	1	0	1	1	3.47867	0.106158	0.558954
circENSSSCG00000016397.2_7	chr15	156986123	156995094	+	8	ENSSSCT00000017854.2	ENSSSCG00000016397.2	35,36,37,38,39,40,41,42	chr15:156983680-156986123|chr15:156995094-156997022	1	0	0	0	0	1	3	5	0	0	1	1	286.316	0	0	0	0	117.071	232.366	606.827	0	0	290.72	242.262	0.78425	0.65282	0.925735	-1.57513	0.299757	0.702245	-1.76569	0.269469	0.564331	0.593685	0.67032	0.891986
circENSSSCG00000016426.2	chr18	4966606	4988253	+	7	ENSSSCT00000017887.2	ENSSSCG00000016426.2	2,3,4,5,6,7,8	chr18:4955147-4966606|chr18:4988253-4997557	0	0	0	0	2	1	0	0	0	0	0	0	0	0	0	0	233.274	117.071	0	0	0	0	0	0	-2.83131	0.255369	0.651868	0	1	1	2.83131	0.275932	0.564331	0	1	1
circENSSSCG00000016509.2	chr18	10776133	10816967	+	8	ENSSSCT00000017974.2	ENSSSCG00000016509.2	3,4,5,6,7,8,9,10	chr18:10746706-10776133|chr18:10816967-10820753	0	0	4	0	0	3	0	0	0	0	0	0	0	0	604.511	0	0	351.213	0	0	0	0	0	0	0.784695	0.761592	0.959133	3.61839	0.121606	0.579834	2.8337	0.289067	0.575046	0	1	1
circENSSSCG00000016509.2_2	chr18	10792103	10800270	+	3	ENSSSCT00000017974.2	ENSSSCG00000016509.2	4,5,6	chr18:10776228-10792103|chr18:10800270-10806734	0	1	2	2	3	5	3	6	4	0	0	0	0	317.991	302.256	240.703	349.911	585.355	232.366	728.192	531.576	0	0	0	-0.769411	0.433705	0.763737	-1.03082	0.281024	0.693863	4.42907	0.0116587	0.218323	4.69048	0.00599478	0.254361
circENSSSCG00000016509.2_3	chr18	10792103	10809210	+	5	ENSSSCT00000017974.2	ENSSSCG00000016509.2	4,5,6,7,8	chr18:10776228-10792103|chr18:10809210-10812042	0	5	3	13	13	7	0	5	2	0	1	0	0	1589.96	453.383	1564.57	1516.28	819.498	0	606.827	265.788	0	290.72	0	-1.00803	0.221958	0.651868	1.20028	0.200383	0.644091	3.5831	0.00191872	0.105435	1.37479	0.3097	0.664182
circENSSSCG00000016509.2_4	chr18	10792103	10812072	+	6	ENSSSCT00000017974.2	ENSSSCG00000016509.2	4,5,6,7,8,9	chr18:10776228-10792103|chr18:10812072-10816775	0	0	1	1	5	3	4	1	5	0	1	0	0	0	151.128	120.351	583.186	351.213	309.821	121.365	664.47	0	290.72	0	-2.02245	0.118729	0.599738	-2.03787	0.113891	0.568223	1.75656	0.183216	0.509661	1.77198	0.177105	0.603178
circENSSSCG00000016509.2_5	chr18	10795153	10809210	+	4	ENSSSCT00000017974.2	ENSSSCG00000016509.2	5,6,7,8	chr18:10792202-10795153|chr18:10809210-10812042	1	0	0	0	0	0	4	0	0	0	0	0	286.316	0	0	0	0	0	309.821	0	0	0	0	0	2.54667	0.290268	0.680727	-0.163692	0.957369	1	0	1	1	2.71036	0.358465	0.684938
circENSSSCG00000016543.2	chr18	16116195	16121801	-	2	ENSSSCT00000018013.2	ENSSSCG00000016543.2	7,6	chr18:16059521-16116195|chr18:16121801-16132127	0	0	0	3	2	0	2	0	0	0	0	0	0	0	0	361.054	233.274	0	154.911	0	0	0	0	0	-3.50396	0.126912	0.602346	-2.01217	0.317124	0.70939	3.50396	0.144526	0.495808	2.01217	0.34592	0.677961
circENSSSCG00000016629.2	chr18	31040614	31067701	-	7	ENSSSCT00000018105.2	ENSSSCG00000016629.2	8,7,6,5,4,3,2	chr18:31039365-31040614|chr18:31067701-31231961	1	0	1	6	2	1	2	0	0	0	0	0	286.316	0	151.128	722.108	233.274	117.071	154.911	0	0	0	0	0	-1.15175	0.378739	0.740684	1.03105	0.481644	0.805894	4.295	0.0291592	0.30232	2.1122	0.288769	0.653682
circENSSSCG00000016629.2_2	chr18	31047047	31067701	-	5	ENSSSCT00000018105.2	ENSSSCG00000016629.2	6,5,4,3,2	chr18:31043048-31047047|chr18:31067701-31231961	0	0	1	2	0	1	2	0	3	0	0	0	0	0	151.128	240.703	0	117.071	154.911	0	398.682	0	0	0	-0.654953	0.697681	0.94366	-1.18939	0.465215	0.804645	2.84883	0.178895	0.508992	3.38328	0.109693	0.56568
circENSSSCG00000016629.2_3	chr18	31060263	31067701	-	2	ENSSSCT00000018105.2	ENSSSCG00000016629.2	3,2	chr18:31049786-31060263|chr18:31067701-31231961	1	0	3	2	2	0	9	7	3	1	0	3	286.316	0	453.383	240.703	233.274	0	697.097	849.557	398.682	284.243	0	726.785	0.812556	0.434437	0.764025	-1.12158	0.192627	0.640478	-1.08787	0.299558	0.584129	0.846264	0.328197	0.672453
circENSSSCG00000016667.2	chr18	43942639	43945974	-	2	ENSSSCT00000018146.2	ENSSSCG00000016667.2	4,3	chr18:43829223-43942639|chr18:43945974-43963436	7	0	0	3	0	0	3	5	1	0	0	0	2004.21	0	0	361.054	0	0	232.366	606.827	132.894	0	0	0	2.26773	0.173914	0.631592	0.964717	0.542602	0.849114	2.8579	0.199906	0.53013	4.16091	0.0675237	0.500922
circENSSSCG00000016667.2_2	chr18	43942639	43963532	-	3	ENSSSCT00000018146.2	ENSSSCG00000016667.2	4,3,2	chr18:43829223-43942639|chr18:43963532-43977511	0	1	3	5	0	0	0	0	1	0	0	0	0	317.991	453.383	601.756	0	0	0	0	132.894	0	0	0	0.387758	0.83322	0.995705	2.27371	0.239053	0.674014	3.51708	0.141661	0.492581	1.63112	0.43269	0.729046
circENSSSCG00000016690.2	chr18	48346420	48355735	-	2	ENSSSCT00000018171.2	ENSSSCG00000016690.2	3,2	chr18:48265555-48346420|chr18:48355735-48385069	0	0	0	0	2	2	0	0	0	0	0	0	0	0	0	0	233.274	234.142	0	0	0	0	0	0	-3.19528	0.200166	0.649073	0	1	1	3.19528	0.219087	0.541331	0	1	1
circENSSSCG00000016692.3	chr18	49340343	49341282	-	2	ENSSSCT00000036364.1	ENSSSCG00000016692.3	5,4	chr18:49332513-49340343|chr18:49341282-49352397	0	1	1	5	2	1	1	4	0	0	0	0	0	317.991	151.128	601.756	233.274	117.071	77.4553	485.461	0	0	0	0	-0.970262	0.472793	0.790819	-0.238803	0.864468	1	4.13313	0.0396968	0.33183	3.40167	0.0976178	0.543231
circENSSSCG00000016692.3_2	chr18	49340343	49354669	-	4	ENSSSCT00000036364.1	ENSSSCG00000016692.3	5,4,3,2	chr18:49332513-49340343|chr18:49354669-49357949	0	0	0	5	1	0	0	0	0	0	0	1	0	0	0	601.756	116.637	0	0	0	0	0	0	242.262	-3.75408	0.108674	0.581337	0	1	1	1.301	0.53088	0.742803	-2.45307	0.170837	0.601796
circENSSSCG00000016758.2	chr18	56233381	56242663	-	2	ENSSSCT00000018240.2	ENSSSCG00000016758.2	3,2	chr18:56232065-56233381|chr18:56242663-56255114	1	0	0	1	5	6	10	5	0	1	0	4	286.316	0	0	120.351	583.186	702.427	774.553	606.827	0	284.243	0	969.047	-2.29924	0.100783	0.581337	-2.32154	0.0946608	0.548967	0.107312	0.924272	1	0.12961	0.906534	1
circENSSSCG00000016762.2	chr18	57721197	57730875	+	3	ENSSSCT00000018246.2	ENSSSCG00000016762.2	4,5,6	chr18:57690772-57721197|chr18:57730875-57746683	0	0	1	3	1	3	2	0	0	0	1	1	0	0	151.128	361.054	116.637	351.213	154.911	0	0	0	290.72	242.262	-1.68215	0.19982	0.649073	0.105947	0.94449	1	0.566815	0.629813	0.82822	-1.22128	0.368385	0.695295
circENSSSCG00000016772.2	chr18	60636454	60645918	+	3	ENSSSCT00000018259.2	ENSSSCG00000016772.2	5,6,7	chr18:60613571-60636454|chr18:60645918-60665189	0	0	3	8	2	1	2	2	1	0	0	0	0	0	453.383	962.81	233.274	117.071	154.911	242.731	132.894	0	0	0	-1.06046	0.373028	0.739279	0.162679	0.889743	1	4.57298	0.0168744	0.235202	3.34984	0.0963198	0.539831
circENSSSCG00000016810.2	chr16	19127488	19136391	-	3	ENSSSCT00000018302.2	ENSSSCG00000016810.2	5,4,3	chr16:19094426-19127488|chr16:19136391-19146665	0	0	3	1	5	0	3	0	1	0	0	1	0	0	453.383	120.351	583.186	0	232.366	0	132.894	0	0	242.262	-0.302426	0.843011	0.996861	0.484476	0.741238	0.960058	1.25563	0.456054	0.689477	0.468727	0.78202	0.964211
circENSSSCG00000016953.2	chr16	47791555	47800473	+	3	ENSSSCT00000018461.2	ENSSSCG00000016953.2	2,3,4	chr16:47778112-47791555|chr16:47800473-47809257	0	1	0	6	0	3	1	2	0	0	0	3	0	317.991	0	722.108	0	351.213	77.4553	242.731	0	0	0	726.785	-1.84533	0.26006	0.654173	-0.260823	0.870498	1	0.452773	0.756032	0.918196	-1.13173	0.455079	0.734227
circENSSSCG00000016953.2_2	chr16	47791555	47817458	+	7	ENSSSCT00000018461.2	ENSSSCG00000016953.2	2,3,4,5,6,7,8	chr16:47778112-47791555|chr16:47817458-47823934	0	0	1	0	1	0	0	1	4	0	0	0	0	0	151.128	0	116.637	0	0	121.365	531.576	0	0	0	0.519948	0.775849	0.966025	-1.45312	0.457727	0.799115	1.6066	0.428206	0.674823	3.57966	0.127388	0.574282
circENSSSCG00000016953.2_3	chr16	47823934	47829752	+	6	ENSSSCT00000018461.2	ENSSSCG00000016953.2	9,10,11,12,13,14	chr16:47817458-47823934|chr16:47829752-47840349	2	0	3	2	0	0	0	0	0	0	0	0	572.633	0	453.383	240.703	0	0	0	0	0	0	0	0	1.90259	0.314562	0.704078	4.27168	0.0291094	0.388856	2.3691	0.291286	0.576281	0	1	1
circENSSSCG00000016953.2_4	chr16	47827437	47829752	+	3	ENSSSCT00000018461.2	ENSSSCG00000016953.2	12,13,14	chr16:47826868-47827437|chr16:47829752-47840349	1	0	1	1	0	1	3	0	1	0	0	0	286.316	0	151.128	120.351	0	117.071	232.366	0	132.894	0	0	0	0.789825	0.569104	0.863965	0.159609	0.904687	1	2.35606	0.243323	0.561409	2.98628	0.133613	0.574388
circENSSSCG00000017069.2	chr16	74325934	74326397	-	2	ENSSSCT00000018585.2	ENSSSCG00000017069.2	9,8	chr16:74323679-74325934|chr16:74326397-74330588	0	0	2	1	0	0	1	0	1	0	0	0	0	0	302.256	120.351	0	0	77.4553	0	132.894	0	0	0	1.30374	0.44658	0.770194	0.707444	0.666401	0.928033	1.61983	0.418189	0.672634	2.21613	0.296243	0.656761
circENSSSCG00000017303.2	chr12	16187561	16194567	+	4	ENSSSCT00000018839.2	ENSSSCG00000017303.2	4,5,6,7	chr12:16184226-16187561|chr12:16194567-16197186	0	0	3	0	1	0	1	0	0	0	2	0	0	0	453.383	0	116.637	0	77.4553	0	0	0	581.441	0	1.74274	0.357122	0.733491	1.98491	0.291178	0.698704	-1.83642	0.353498	0.62038	-2.07859	0.290245	0.653682
circENSSSCG00000017366.2	chr12	19366397	19367156	-	3	ENSSSCT00000018905.2	ENSSSCG00000017366.2	12,11,10	chr12:19365330-19366397|chr12:19367156-19369061	0	0	0	0	0	0	2	0	0	0	0	0	0	0	0	0	0	0	154.911	0	0	0	0	0	0	1	1	-1.95433	0.385479	0.764073	0	1	1	1.95433	0.408842	0.729046
circENSSSCG00000017648.2	chr12	37135027	37138400	+	3	ENSSSCT00000019212.2	ENSSSCG00000017648.2	6,7,8	chr12:37132151-37135027|chr12:37138400-37146038	0	0	1	0	0	4	0	1	0	0	0	0	0	0	151.128	0	0	468.284	0	121.365	0	0	0	0	-1.1604	0.652809	0.925735	0.428471	0.842465	1	3.19707	0.23683	0.557553	1.6082	0.463615	0.734227
circENSSSCG00000017773.2	chr12	46904603	46905337	+	2	ENSSSCT00000019345.2	ENSSSCG00000017773.2	7,8	chr12:46903688-46904603|chr12:46905337-46905823	1	0	0	1	0	0	0	0	0	0	1	0	286.316	0	0	120.351	0	0	0	0	0	0	290.72	0	0.882963	0.70897	0.947178	2.50762	0.199038	0.644091	-0.944644	0.688144	0.869453	-2.5693	0.191725	0.606976
circENSSSCG00000017868.2	chr12	51643737	51644820	-	3	ENSSSCT00000019444.2	ENSSSCG00000017868.2	13,12,11	chr12:51642878-51643737|chr12:51644820-51646601	0	0	0	0	2	3	0	0	0	0	0	0	0	0	0	0	233.274	351.213	0	0	0	0	0	0	-3.4853	0.185287	0.645615	0	1	1	3.4853	0.201941	0.533417	0	1	1
circENSSSCG00000020663.1	chr18	5545553	5548966	+	2	ENSSSCT00000025866.1	ENSSSCG00000020663.1	6,7	chr18:5544813-5545553|chr18:5548966-5550638	0	2	0	0	0	2	5	1	2	0	0	3	0	635.982	0	0	0	234.142	387.276	121.365	265.788	0	0	726.785	1.02027	0.527893	0.83444	-0.51419	0.722543	0.952405	-1.4981	0.324949	0.608774	0.0363681	0.980059	1
circENSSSCG00000020668.1	chr6	12648432	12656894	+	5	ENSSSCT00000028190.1	ENSSSCG00000020668.1	4,5,6,7,8	chr6:12644039-12648432|chr6:12656894-12663213	0	2	1	5	2	0	3	2	1	0	1	0	0	635.982	151.128	601.756	233.274	0	232.366	242.731	132.894	0	290.72	0	-0.20286	0.862563	1	0.192234	0.87627	1	1.4231	0.318085	0.603067	1.02801	0.477253	0.745527
circENSSSCG00000020743.1	chr1	297336188	297372240	+	5	ENSSSCT00000024937.1	ENSSSCG00000020743.1	2,3,4,5,6	chr1:297320708-297336188|chr1:297372240-297377145	0	0	0	1	2	1	0	1	0	0	0	0	0	0	0	120.351	233.274	117.071	0	121.365	0	0	0	0	-3.20449	0.0892885	0.562327	-1.53137	0.388096	0.764073	3.20449	0.11115	0.451689	1.53137	0.421975	0.729046
circENSSSCG00000021154.1	chr16	51875109	51882162	-	3	ENSSSCT00000026987.1	ENSSSCG00000021154.1	3,2,1	chr16:51872530-51875109|None	0	0	1	0	0	0	3	0	0	0	0	0	0	0	151.128	0	0	0	232.366	0	0	0	0	0	2.04756	0.264142	0.655369	-0.361246	0.881442	1	0	1	1	2.4088	0.320344	0.669693
circENSSSCG00000021203.1	chr13	87134377	87140810	-	4	ENSSSCT00000024030.1	ENSSSCG00000021203.1	10,9,8,7	chr13:87120142-87134377|chr13:87140810-87157308	0	0	1	0	1	0	2	2	2	0	0	0	0	0	151.128	0	116.637	0	154.911	242.731	265.788	0	0	0	0.666295	0.666693	0.933481	-1.32272	0.307676	0.708347	1.61114	0.398487	0.666549	3.60015	0.0552018	0.473818
circENSSSCG00000021273.1	chr1	16348339	16357950	+	4	ENSSSCT00000031249.1	ENSSSCG00000021273.1	17,18,19,20	chr1:16340328-16348339|chr1:16357950-16360634	0	0	0	0	2	1	0	0	0	0	0	0	0	0	0	0	233.274	117.071	0	0	0	0	0	0	-2.83131	0.255369	0.651868	0	1	1	2.83131	0.275932	0.564331	0	1	1
circENSSSCG00000021285.1	chr3	4820088	4881241	-	2	ENSSSCT00000029070.1	ENSSSCG00000021285.1	8,7	chr3:4804394-4820088|chr3:4881241-4946356	1	0	2	3	1	1	3	0	2	0	0	2	286.316	0	302.256	361.054	116.637	117.071	232.366	0	265.788	0	0	484.524	0.133341	0.906663	1	0.323532	0.780163	0.981304	0.14561	0.909304	1	-0.0445808	0.971376	1
circENSSSCG00000021322.1	chrX	21717558	21721310	+	2	ENSSSCT00000027404.1	ENSSSCG00000021322.1	2,3	chrX:21638752-21717558|chrX:21721310-21741071	8	7	9	18	13	28	37	12	16	6	7	5	2290.53	2225.94	1360.15	2166.32	1516.28	3277.99	2865.84	1456.38	2126.31	1705.46	2035.04	1211.31	-0.303207	0.534481	0.838396	-0.21887	0.652404	0.916538	0.501685	0.325086	0.608774	0.417349	0.411531	0.729046
circENSSSCG00000021579.1	chr3	72491294	72519969	-	6	ENSSSCT00000026747.1	ENSSSCG00000021579.1	8,7,6,5,4,3	chr3:72471636-72491294|chr3:72519969-72528343	1	0	0	3	1	0	2	0	0	0	0	2	286.316	0	0	361.054	116.637	0	154.911	0	0	0	0	484.524	-0.776451	0.662844	0.930724	0.393812	0.843459	1	-0.0947475	0.953401	1	-1.26501	0.465156	0.734227
circENSSSCG00000021677.1	chr15	145610976	145614211	+	3	ENSSSCT00000031305.1	ENSSSCG00000021677.1	5,6,7	chr15:145608522-145610976|chr15:145614211-145627648	0	0	0	0	1	0	4	2	0	0	0	0	0	0	0	0	116.637	0	309.821	242.731	0	0	0	0	-1.6072	0.391804	0.74499	-3.45218	0.106188	0.561694	1.6072	0.422552	0.673516	3.45218	0.124441	0.572872
circENSSSCG00000021760.1	chr2	4159830	4164547	+	2	ENSSSCT00000031254.1	ENSSSCG00000021760.1	3,4	chr2:4158901-4159830|chr2:4164547-4170374	0	1	0	1	0	1	0	1	4	0	0	1	0	317.991	0	120.351	0	117.071	0	121.365	531.576	0	0	242.262	0.10236	0.962751	1	-1.09349	0.519297	0.829291	-0.117047	0.944727	1	1.0788	0.532698	0.780612
circENSSSCG00000021760.1_2	chr2	4170374	4170941	+	2	ENSSSCT00000031254.1	ENSSSCG00000021760.1	5,6	chr2:4164547-4170374|chr2:4170941-4172880	0	0	1	0	0	3	0	0	0	0	0	0	0	0	151.128	0	0	351.213	0	0	0	0	0	0	-0.775822	0.745717	0.953584	2.05833	0.241187	0.674014	2.83415	0.25973	0.564331	0	1	1
circENSSSCG00000021829.1	chr11	11212641	11217519	+	3	ENSSSCT00000027784.1	ENSSSCG00000021829.1	2,3,4	chr11:11141587-11212641|chr11:11217519-11225756	1	0	0	2	0	2	0	0	0	0	0	0	286.316	0	0	240.703	0	234.142	0	0	0	0	0	0	-0.737895	0.714057	0.948679	2.47401	0.170438	0.62612	3.21191	0.177248	0.508992	0	1	1
circENSSSCG00000022177.1	chr15	146530960	146535869	+	2	ENSSSCT00000026575.1	ENSSSCG00000022177.1	7,8	chr15:146501442-146530960|chr15:146535869-146560510	2	0	0	0	1	0	3	1	0	0	0	1	572.633	0	0	0	116.637	0	232.366	121.365	0	0	0	242.262	1.73146	0.324736	0.708887	0.421227	0.80382	0.992984	-0.863943	0.636932	0.83303	0.446291	0.798298	0.972894
circENSSSCG00000022299.1	chr1	208219318	208227424	+	4	ENSSSCT00000030515.1	ENSSSCG00000022299.1	5,6,7,8	chr1:208217557-208219318|chr1:208227424-208231634	0	1	1	0	4	7	4	3	0	0	0	1	0	317.991	151.128	0	466.549	819.498	309.821	364.096	0	0	0	242.262	-1.39083	0.289899	0.680727	-0.555372	0.678577	0.933922	2.06421	0.157523	0.502947	1.22875	0.413697	0.729046
circENSSSCG00000022331.1	chrX	129615818	129621738	+	2	ENSSSCT00000029012.1	ENSSSCG00000022331.1	2,3	chrX:129613879-129615818|chrX:129621738-129686500	0	1	1	0	0	0	2	5	0	0	0	0	0	317.991	151.128	0	0	0	154.911	606.827	0	0	0	0	3.16917	0.0723986	0.528007	-0.659308	0.680938	0.933922	0	1	1	3.82847	0.0814243	0.519735
circENSSSCG00000022633.1	chr13	75857203	75862009	-	4	ENSSSCT00000031449.1	ENSSSCG00000022633.1	8,7,6,5	chr13:75849549-75857203|chr13:75862009-75864190	0	0	1	0	0	0	2	0	0	0	0	0	0	0	151.128	0	0	0	154.911	0	0	0	0	0	2.03501	0.2753	0.668445	0.0712249	0.972596	1	0	1	1	1.96379	0.395222	0.720629
circENSSSCG00000022708.1	chr3	74772970	74778873	-	2	ENSSSCT00000026994.1	ENSSSCG00000022708.1	3,2	chr3:74767479-74772970|chr3:74778873-74790391	0	0	0	1	1	1	5	1	1	0	1	0	0	0	0	120.351	116.637	117.071	387.276	121.365	132.894	0	290.72	0	-2.8421	0.123864	0.602346	-3.71997	0.0333948	0.409939	0.319383	0.825768	0.975411	1.19725	0.364981	0.69276
circENSSSCG00000022734.1	chr18	5567766	5570723	+	4	ENSSSCT00000026487.1	ENSSSCG00000022734.1	2,3,4,5	chr18:5563021-5567766|chr18:5570723-5572499	0	0	7	2	0	0	1	4	0	0	0	1	0	0	1057.89	240.703	0	0	77.4553	485.461	0	0	0	242.262	2.06331	0.222599	0.651868	1.01259	0.529435	0.839086	-0.0970364	0.956016	1	0.953679	0.610127	0.840241
circENSSSCG00000022734.1_2	chr18	5575093	5580873	+	5	ENSSSCT00000026487.1	ENSSSCG00000022734.1	9,10,11,12,13	chr18:5573981-5575093|chr18:5580873-5581150	1	0	0	4	3	0	2	1	1	1	1	0	286.316	0	0	481.405	349.911	0	154.911	121.365	132.894	284.243	290.72	0	-1.59232	0.242115	0.651868	-0.684781	0.630557	0.903734	0.547441	0.655347	0.846521	-0.360101	0.783065	0.964877
circENSSSCG00000022845.1	chr2	118941643	118947455	-	2	ENSSSCT00000026253.1	ENSSSCG00000022845.1	3,2	chr2:118929391-118941643|chr2:118947455-118961610	0	0	2	0	2	0	4	0	2	0	0	0	0	0	302.256	0	233.274	0	309.821	0	265.788	0	0	0	0.577667	0.724744	0.949643	-0.565186	0.734077	0.958595	2.34727	0.274277	0.564331	3.49012	0.114621	0.572872
circENSSSCG00000022903.1	chr9	113839505	113839812	-	1	ENSSSCT00000016799.2	ENSSSCG00000022903.1	2	chr9:113828959-113839505|chr9:113839812-113870690	0	0	1	0	0	1	0	0	0	0	0	1	0	0	151.128	0	0	117.071	0	0	0	0	0	242.262	0.441094	0.837179	0.996861	2.04803	0.249879	0.677032	-0.828374	0.724134	0.893374	-2.43531	0.209231	0.611265
circENSSSCG00000022957.1	chr11	87126534	87130958	-	3	ENSSSCT00000029020.1	ENSSSCG00000022957.1	4,3,2	chr11:87125774-87126534|chr11:87130958-87132153	0	0	1	11	10	3	1	3	0	0	3	1	0	0	151.128	1323.86	1166.37	351.213	77.4553	364.096	0	0	872.161	242.262	-3.40583	0.00541364	0.31183	-0.831503	0.565317	0.865619	1.33188	0.177376	0.508992	-1.24244	0.279892	0.651471
circENSSSCG00000022963.1	chr3	42032746	42066875	-	6	ENSSSCT00000032550.1	ENSSSCG00000022963.1	8,7,6,5,4,3	chr3:42032554-42032746|chr3:42066875-42077023	0	0	0	3	0	1	0	0	0	0	0	0	0	0	0	361.054	0	117.071	0	0	0	0	0	0	-3.22004	0.197067	0.649073	0	1	1	3.22004	0.215852	0.541331	0	1	1
circENSSSCG00000022963.1_2	chr3	42052105	42066875	-	4	ENSSSCT00000032550.1	ENSSSCG00000022963.1	6,5,4,3	chr3:42033446-42052105|chr3:42066875-42077023	1	2	6	7	5	4	15	9	9	0	1	1	286.316	635.982	906.767	842.459	583.186	468.284	1161.83	1092.29	1196.05	0	290.72	242.262	0.0824963	0.897547	1	-0.76733	0.186659	0.639087	1.70215	0.0644277	0.384121	2.55198	0.00195299	0.15446
circENSSSCG00000022963.1_3	chr3	42066183	42066875	-	2	ENSSSCT00000032550.1	ENSSSCG00000022963.1	4,3	chr3:42053774-42066183|chr3:42066875-42077023	2	0	2	5	3	0	4	1	2	0	0	1	572.633	0	302.256	601.756	349.911	0	309.821	121.365	265.788	0	0	242.262	-0.0730745	0.946248	1	0.308904	0.777087	0.979964	1.63238	0.232237	0.554729	1.2504	0.368343	0.695295
circENSSSCG00000022963.1_4	chr3	42066183	42077233	-	3	ENSSSCT00000032550.1	ENSSSCG00000022963.1	4,3,2	chr3:42053774-42066183|chr3:42077233-42078354	2	0	0	0	2	3	4	1	1	0	0	0	572.633	0	0	0	233.274	351.213	309.821	121.365	132.894	0	0	0	-0.207882	0.875326	1	-0.214746	0.868149	1	3.48969	0.0874523	0.424044	3.49656	0.0845236	0.526829
circENSSSCG00000023197.1	chr1	297457503	297458286	+	3	ENSSSCT00000023452.1	ENSSSCG00000023197.1	2,3,4	chr1:297445171-297457503|chr1:297458286-297466977	0	0	0	0	0	0	2	0	0	0	0	0	0	0	0	0	0	0	154.911	0	0	0	0	0	0	1	1	-1.95433	0.385479	0.764073	0	1	1	1.95433	0.408842	0.729046
circENSSSCG00000023725.1	chr18	48576461	48606383	-	3	ENSSSCT00000023220.1	ENSSSCG00000023725.1	4,3,2	chr18:48508018-48576461|chr18:48606383-48682523	0	0	0	0	0	0	3	0	0	0	0	0	0	0	0	0	0	0	232.366	0	0	0	0	0	0	1	1	-2.39927	0.31381	0.708347	0	1	1	2.39927	0.336125	0.672453
circENSSSCG00000023738.1	chr11	22240396	22243973	-	4	ENSSSCT00000027352.1	ENSSSCG00000023738.1	7,6,5,4	chr11:22237927-22240396|chr11:22243973-22246322	0	0	9	3	2	1	5	2	1	0	0	1	0	0	1360.15	361.054	233.274	117.071	387.276	242.731	132.894	0	0	242.262	1.14256	0.290248	0.680727	0.995027	0.346295	0.732063	1.24828	0.396693	0.666549	1.39582	0.333523	0.672453
circENSSSCG00000023738.1_2	chr11	22243067	22249363	-	4	ENSSSCT00000027352.1	ENSSSCG00000023738.1	5,4,3,2	chr11:22241327-22243067|chr11:22249363-22262212	0	0	0	2	3	0	0	0	0	0	2	0	0	0	0	240.703	349.911	0	0	0	0	0	581.441	0	-3.49736	0.137399	0.602829	0	1	1	0.0505956	0.979433	1	-3.44676	0.079939	0.519735
circENSSSCG00000023854.1	chr15	152173931	152175079	-	2	ENSSSCT00000031569.1	ENSSSCG00000023854.1	5,4	chr15:152172110-152173931|chr15:152175079-152175486	7	8	16	23	10	21	21	8	15	0	3	9	2004.21	2543.93	2418.04	2768.08	1166.37	2458.49	1626.56	970.923	1993.41	0	872.161	2180.36	0.127091	0.819317	0.988848	0.598763	0.290258	0.698704	0.996463	0.112143	0.451689	0.52479	0.411489	0.729046
circENSSSCG00000024158.1	chr2	1595081	1602858	-	5	ENSSSCT00000027944.1	ENSSSCG00000024158.1	7,6,5,4,3	chr2:1593459-1595081|chr2:1602858-1603737	0	0	2	0	2	0	9	4	2	2	0	0	0	0	302.256	0	233.274	0	697.097	485.461	265.788	568.485	0	0	0.691456	0.614331	0.897662	-1.70718	0.148751	0.60548	-1.04916	0.459246	0.689853	1.34948	0.256061	0.647009
circENSSSCG00000024292.1	chr3	43036165	43037325	-	2	ENSSSCT00000027044.1	ENSSSCG00000024292.1	8,7	chr3:43031204-43036165|chr3:43037325-43039603	0	0	0	0	0	2	0	0	1	0	3	0	0	0	0	0	0	234.142	0	0	132.894	0	872.161	0	-2.34734	0.309112	0.702469	-1.66447	0.423833	0.783364	-1.65431	0.495806	0.710643	-2.33718	0.338114	0.674393
circENSSSCG00000024292.1_2	chr3	43036165	43046846	-	6	ENSSSCT00000027044.1	ENSSSCG00000024292.1	8,7,6,5,4,3	chr3:43031204-43036165|chr3:43046846-43048868	1	0	2	0	0	1	3	0	3	2	0	0	286.316	0	302.256	0	0	117.071	232.366	0	398.682	568.485	0	0	1.99516	0.184322	0.645472	0.0270075	0.981251	1	-1.7969	0.258275	0.564331	0.171254	0.901821	1
circENSSSCG00000024292.1_3	chr3	43036165	43048981	-	7	ENSSSCT00000027044.1	ENSSSCG00000024292.1	8,7,6,5,4,3,2	chr3:43031204-43036165|chr3:43048981-43051211	0	0	0	0	0	0	1	0	0	0	0	0	0	0	0	0	0	0	77.4553	0	0	0	0	0	0	1	1	-1.30103	0.499933	0.812694	0	1	1	1.30103	0.523585	0.774081
circENSSSCG00000024292.1_4	chr3	43037181	43046846	-	5	ENSSSCT00000027044.1	ENSSSCG00000024292.1	7,6,5,4,3	chr3:43036318-43037181|chr3:43046846-43048868	0	0	2	3	1	0	3	0	0	1	0	0	0	0	302.256	361.054	116.637	0	232.366	0	0	284.243	0	0	-0.294322	0.866784	1	0.436537	0.790793	0.986505	0.678181	0.706612	0.880834	-0.0526781	0.98492	1
circENSSSCG00000024614.1	chr13	207224169	207225216	-	2	ENSSSCT00000027819.1	ENSSSCG00000024614.1	9,8	chr13:207219091-207224169|chr13:207225216-207229347	0	0	5	0	1	0	1	0	0	0	0	0	0	0	755.639	0	116.637	0	77.4553	0	0	0	0	0	2.34703	0.257145	0.65279	2.60402	0.206014	0.652755	1.6056	0.439618	0.682635	1.34862	0.48184	0.750176
circENSSSCG00000024887.1	chr6	85419248	85422743	-	3	ENSSSCT00000030097.1	ENSSSCG00000024887.1	12,11,10	chr6:85418628-85419248|chr6:85422743-85428673	1	2	0	0	3	1	14	2	2	0	1	0	286.316	635.982	0	0	349.911	117.071	1084.37	242.731	265.788	0	290.72	0	0.668988	0.609852	0.896104	-1.03534	0.374158	0.756441	0.66824	0.661158	0.850382	2.37257	0.0866561	0.529092
circENSSSCG00000024887.1_2	chr6	85419248	85430771	-	5	ENSSSCT00000030097.1	ENSSSCG00000024887.1	12,11,10,9,8	chr6:85418628-85419248|chr6:85430771-85446256	1	0	3	0	2	0	6	0	1	1	0	0	286.316	0	453.383	0	233.274	0	464.732	0	132.894	284.243	0	0	1.57397	0.286088	0.677949	0.323518	0.813065	0.996488	-0.184389	0.916182	1	1.06606	0.508184	0.768004
circENSSSCG00000024887.1_3	chr6	85446256	85450927	-	2	ENSSSCT00000030097.1	ENSSSCG00000024887.1	7,6	chr6:85430771-85446256|chr6:85450927-85451718	0	0	2	1	8	6	5	2	2	1	3	1	0	0	302.256	120.351	933.097	702.427	387.276	242.731	265.788	284.243	872.161	242.262	-1.90695	0.0727742	0.528007	-1.01095	0.370027	0.755378	0.353055	0.696768	0.875193	-0.542944	0.572052	0.811921
circENSSSCG00000024887.1_4	chr6	85446256	85455157	-	4	ENSSSCT00000030097.1	ENSSSCG00000024887.1	7,6,5,4	chr6:85430771-85446256|chr6:85455157-85455919	2	0	4	1	1	0	2	3	2	0	0	1	572.633	0	604.511	120.351	116.637	0	154.911	364.096	265.788	0	0	242.262	2.21488	0.0416257	0.466654	0.751515	0.41275	0.778361	-0.150473	0.919809	1	1.31289	0.317961	0.6684
circENSSSCG00000024887.1_5	chr6	85450793	85455157	-	3	ENSSSCT00000030097.1	ENSSSCG00000024887.1	6,5,4	chr6:85446441-85450793|chr6:85455157-85455919	0	0	0	0	1	0	0	0	0	0	0	0	0	0	0	0	116.637	0	0	0	0	0	0	0	-1.60361	0.45346	0.773536	0	1	1	1.60361	0.476898	0.696275	0	1	1
circENSSSCG00000025176.1	chr2	61950217	61953288	+	2	ENSSSCT00000024966.1	ENSSSCG00000025176.1	3,4	chr2:61949059-61950217|chr2:61953288-61955865	0	2	2	3	10	1	2	0	0	0	2	0	0	635.982	302.256	361.054	1166.37	117.071	154.911	0	0	0	581.441	0	-0.806063	0.499029	0.811316	1.97923	0.146828	0.605337	1.47733	0.257964	0.564331	-1.30796	0.382619	0.709467
circENSSSCG00000025221.1	chr18	3240830	3242166	+	2	ENSSSCT00000025847.1	ENSSSCG00000025221.1	8,9	chr18:3239548-3240830|chr18:3242166-3242692	0	2	4	2	6	4	9	3	5	4	2	8	0	635.982	604.511	240.703	699.823	468.284	697.097	364.096	664.47	1136.97	581.441	1938.09	-0.0823063	0.917559	1	-0.383794	0.611434	0.894443	-1.3694	0.0406269	0.336808	-1.06791	0.0954767	0.539555
circENSSSCG00000025276.1	chr14	98532044	98532424	+	2	ENSSSCT00000023429.1	ENSSSCG00000025276.1	3,4	chr14:98526073-98532044|chr14:98532424-98536209	1	0	1	1	0	0	1	6	4	0	0	0	286.316	0	151.128	120.351	0	0	77.4553	728.192	531.576	0	0	0	1.52643	0.323014	0.708165	-1.41148	0.280916	0.693863	1.61652	0.405953	0.669209	4.55443	0.0199374	0.373777
circENSSSCG00000025305.1	chr3	140437842	140438591	+	2	ENSSSCT00000027102.1	ENSSSCG00000025305.1	3,4	chr3:140435795-140437842|chr3:140438591-140439678	1	5	9	41	16	10	5	11	9	0	2	3	286.316	1589.96	1360.15	4934.4	1866.19	1170.71	387.276	1335.02	1196.05	0	581.441	726.785	-1.2619	0.0953474	0.569987	0.205331	0.793349	0.988166	2.52365	0.00357982	0.134806	1.05643	0.244134	0.639137
circENSSSCG00000025606.1	chr9	40756961	40763532	-	3	ENSSSCT00000028051.1	ENSSSCG00000025606.1	49,48,47	chr9:40754539-40756961|chr9:40763532-40767095	0	0	0	0	0	0	3	1	0	0	0	0	0	0	0	0	0	0	232.366	121.365	0	0	0	0	0	1	1	-2.87315	0.242663	0.674466	0	1	1	2.87315	0.26323	0.649098
circENSSSCG00000025606.1_2	chr9	40777740	40785836	-	5	ENSSSCT00000028051.1	ENSSSCG00000025606.1	41,40,39,38,37	chr9:40775635-40777740|chr9:40785836-40787180	0	0	0	0	3	0	3	0	1	0	0	1	0	0	0	0	349.911	0	232.366	0	132.894	0	0	242.262	-2.83228	0.188456	0.647901	-2.92547	0.173693	0.62612	0.37189	0.849738	0.987292	0.465083	0.808488	0.979883
circENSSSCG00000025606.1_3	chr9	40778850	40785836	-	4	ENSSSCT00000028051.1	ENSSSCG00000025606.1	40,39,38,37	chr9:40777873-40778850|chr9:40785836-40787180	0	0	2	0	2	4	2	1	3	0	0	0	0	0	302.256	0	233.274	468.284	154.911	121.365	398.682	0	0	0	-0.71736	0.595756	0.883635	-0.619679	0.649161	0.915696	3.73103	0.0639656	0.383942	3.63334	0.0718433	0.508793
circENSSSCG00000025738.1	chr13	126801545	126803540	-	2	ENSSSCT00000024882.1	ENSSSCG00000025738.1	6,5	chr13:126790574-126801545|chr13:126803540-126810720	0	0	2	6	1	7	9	3	1	1	0	0	0	0	302.256	722.108	116.637	819.498	697.097	364.096	132.894	284.243	0	0	-1.85051	0.110597	0.588448	-1.46555	0.210591	0.656407	2.37643	0.0698189	0.393433	1.99147	0.133819	0.574388
circENSSSCG00000025738.1_1	chr13	126801545	126810842	-	3	ENSSSCT00000024882.1	ENSSSCG00000025738.1	6,5,4	chr13:126790574-126801545|chr13:126810842-126818458	0	0	2	4	1	10	3	5	0	0	0	0	0	0	302.256	481.405	116.637	1170.71	232.366	606.827	0	0	0	0	-1.9909	0.130357	0.602346	-0.967751	0.476819	0.805894	4.99259	0.0101174	0.206256	3.96944	0.0489464	0.468969
circENSSSCG00000025738.1_2	chr13	126801545	126818519	-	4	ENSSSCT00000024882.1	ENSSSCG00000025738.1	6,5,4,3	chr13:126790574-126801545|chr13:126818519-126825914	0	0	1	0	0	0	1	1	2	0	0	0	0	0	151.128	0	0	0	77.4553	121.365	265.788	0	0	0	2.21553	0.170302	0.626622	-0.908758	0.563703	0.865566	0	1	1	3.12429	0.131095	0.574282
circENSSSCG00000025738.1_3	chr13	126801545	126826040	-	5	ENSSSCT00000024882.1	ENSSSCG00000025738.1	6,5,4,3,2	chr13:126790574-126801545|chr13:126826040-126851948	1	0	4	0	0	3	2	0	0	0	0	0	286.316	0	604.511	0	0	351.213	154.911	0	0	0	0	0	1.31105	0.428496	0.762693	2.1079	0.21178	0.656555	2.83578	0.203451	0.536147	2.03894	0.326855	0.672453
circENSSSCG00000025738.1_4	chr13	126803397	126810842	-	2	ENSSSCT00000024882.1	ENSSSCG00000025738.1	5,4	chr13:126801730-126803397|chr13:126810842-126818458	0	0	2	3	0	0	4	6	3	0	2	0	0	0	302.256	361.054	0	0	309.821	728.192	398.682	0	581.441	0	0.166968	0.897243	1	-1.66639	0.188756	0.639087	-0.560345	0.692437	0.873232	1.27301	0.31656	0.667997
circENSSSCG00000025738.1_5	chr13	126810720	126818519	-	2	ENSSSCT00000024882.1	ENSSSCG00000025738.1	4,3	chr13:126803540-126810720|chr13:126818519-126825914	0	0	0	2	1	0	3	0	4	0	0	0	0	0	0	240.703	116.637	0	232.366	0	531.576	0	0	0	-2.84844	0.158236	0.622196	-3.82168	0.0599699	0.468576	2.84844	0.183744	0.50983	3.82168	0.0740219	0.510087
circENSSSCG00000025802.1	chr2	112627932	112631954	+	3	ENSSSCT00000023670.1	ENSSSCG00000025802.1	3,4,5	chr2:112624730-112627932|chr2:112631954-112634092	1	3	3	2	3	0	2	0	0	0	2	0	286.316	953.973	453.383	240.703	349.911	0	154.911	0	0	0	581.441	0	1.39027	0.205378	0.650936	2.75761	0.0218649	0.361006	0.0887619	0.944896	1	-1.27858	0.37198	0.698922
circENSSSCG00000025941.1	chr1	50516495	50517149	+	2	ENSSSCT00000026265.1	ENSSSCG00000025941.1	2,3	chr1:50512002-50516495|chr1:50517149-50518667	1	2	0	0	0	0	4	0	0	0	0	0	286.316	635.982	0	0	0	0	309.821	0	0	0	0	0	4.03048	0.0679399	0.52478	1.27587	0.563137	0.865095	0	1	1	2.7546	0.254741	0.647009
circENSSSCG00000025952.1	chr12	40897654	40899010	-	2	ENSSSCT00000029546.1	ENSSSCG00000025952.1	4,3	chr12:40896793-40897654|chr12:40899010-40900044	0	0	0	0	2	0	2	0	0	0	0	2	0	0	0	0	233.274	0	154.911	0	0	0	0	484.524	-2.34397	0.3111	0.70365	-1.97112	0.360534	0.745073	-0.933088	0.697126	0.875193	-1.30594	0.583753	0.820436
circENSSSCG00000026041.1	chr1	30986497	31001898	+	3	ENSSSCT00000025418.1	ENSSSCG00000026041.1	23,24,25	chr1:30980372-30986497|chr1:31001898-31007010	0	0	0	0	0	0	1	0	0	0	0	0	0	0	0	0	0	0	77.4553	0	0	0	0	0	0	1	1	-1.30103	0.499933	0.812694	0	1	1	1.30103	0.523585	0.774081
circENSSSCG00000026232.1	chr8	12441714	12443530	-	2	ENSSSCT00000022757.1	ENSSSCG00000026232.1	12,11	chr8:12439025-12441714|chr8:12443530-12445462	0	0	0	0	0	1	0	2	0	0	0	1	0	0	0	0	0	117.071	0	242.731	0	0	0	242.262	-1.60719	0.422787	0.762693	-2.35675	0.298811	0.701987	-0.832738	0.711407	0.883853	-0.0831797	0.966895	1
circENSSSCG00000026353.1	chr9	101484690	101486805	-	3	ENSSSCT00000029737.1	ENSSSCG00000026353.1	4,3,2	chr9:101480651-101484690|chr9:101486805-101492757	1	0	5	0	1	3	4	5	4	1	3	7	286.316	0	755.639	0	116.637	351.213	309.821	606.827	531.576	284.243	872.161	1695.83	1.31826	0.184739	0.645472	-0.151921	0.864112	1	-2.49469	0.00595157	0.171444	-1.02451	0.192292	0.606976
circENSSSCG00000026487.1	chr1	263638778	263645595	-	3	ENSSSCT00000029098.1	ENSSSCG00000026487.1	4,3,2	chr1:263633240-263638778|chr1:263645595-263646953	0	1	1	0	0	1	3	1	2	0	0	0	0	317.991	151.128	0	0	117.071	232.366	121.365	265.788	0	0	0	1.54272	0.265884	0.656961	-0.419048	0.703306	0.944141	1.61164	0.397145	0.666549	3.5734	0.0537789	0.473818
circENSSSCG00000026593.1	chr5	45996381	45998196	-	2	ENSSSCT00000024435.1	ENSSSCG00000026593.1	4,3	chr5:45994730-45996381|chr5:45998196-46001159	0	0	2	6	4	2	3	1	1	0	5	3	0	0	302.256	722.108	466.549	234.142	232.366	121.365	132.894	0	1453.6	726.785	-1.61333	0.145182	0.618363	-0.232998	0.850781	1	-0.593443	0.500683	0.712952	-1.97377	0.041818	0.45072
circENSSSCG00000026652.1	chr18	1418567	1418950	+	2	ENSSSCT00000025384.1	ENSSSCG00000026652.1	2,3	chr18:1417844-1418567|chr18:1418950-1420403	2	0	1	1	0	0	3	3	2	0	0	0	572.633	0	151.128	120.351	0	0	232.366	364.096	265.788	0	0	0	2.08809	0.112503	0.595751	-0.275821	0.784697	0.98275	1.61351	0.398066	0.666549	3.97742	0.0287739	0.426251
circENSSSCG00000026692.1	chr15	37995042	37995443	+	2	ENSSSCT00000031691.1	ENSSSCG00000026692.1	2,3	chr15:37994487-37995042|chr15:37995443-37997239	1	2	6	3	6	5	2	0	1	1	0	1	286.316	635.982	906.767	361.054	699.823	585.355	154.911	0	132.894	284.243	0	242.262	0.257657	0.712865	0.948018	2.47149	0.00530552	0.191227	1.5146	0.12053	0.460419	-0.699228	0.568615	0.809197
circENSSSCG00000026753.1	chr13	144384383	144395141	+	4	ENSSSCT00000030116.1	ENSSSCG00000026753.1	2,3,4,5	chr13:144366385-144384383|chr13:144395141-144403405	0	0	0	3	0	0	0	1	0	0	0	0	0	0	0	361.054	0	0	0	121.365	0	0	0	0	-2.8621	0.236368	0.651868	-1.60277	0.428949	0.783793	2.8621	0.257555	0.564331	1.60277	0.455439	0.734227
circENSSSCG00000026753.1_2	chr13	144391255	144392386	+	2	ENSSSCT00000030116.1	ENSSSCG00000026753.1	3,4	chr13:144384452-144391255|chr13:144392386-144394964	0	0	0	0	2	3	0	1	0	1	0	1	0	0	0	0	233.274	351.213	0	121.365	0	284.243	0	242.262	-3.48951	0.0713115	0.52478	-1.54316	0.390697	0.765683	0.118039	0.932981	1	-1.82831	0.239086	0.636121
circENSSSCG00000026753.1_3	chr13	144391255	144395141	+	3	ENSSSCT00000030116.1	ENSSSCG00000026753.1	3,4,5	chr13:144384452-144391255|chr13:144395141-144403405	2	0	2	1	1	2	4	1	1	0	1	0	572.633	0	302.256	120.351	116.637	234.142	309.821	121.365	132.894	0	290.72	0	0.857875	0.410716	0.753072	0.523272	0.597525	0.886819	0.684522	0.620918	0.82233	1.01912	0.439525	0.730073
circENSSSCG00000026915.1	chr13	212960777	212961105	-	2	ENSSSCT00000025047.1	ENSSSCG00000026915.1	7,6	chr13:212957590-212960777|chr13:212961105-212963032	0	0	0	3	2	1	1	0	2	0	0	0	0	0	0	361.054	233.274	117.071	77.4553	0	265.788	0	0	0	-3.74053	0.0394209	0.45914	-2.72586	0.145309	0.603499	3.74053	0.0531527	0.367604	2.72586	0.174029	0.601796
circENSSSCG00000026968.1	chr17	12976260	12983074	+	3	ENSSSCT00000026753.1	ENSSSCG00000026968.1	2,3,4	chr17:12966914-12976260|chr17:12983074-12984398	0	0	1	1	3	1	2	0	0	0	0	0	0	0	151.128	120.351	349.911	117.071	154.911	0	0	0	0	0	-1.26753	0.397979	0.746934	0.112042	0.944204	1	3.49317	0.0850933	0.418844	2.1136	0.288174	0.653682
circENSSSCG00000027002.1	chr1	72651151	72656373	+	3	ENSSSCT00000031034.1	ENSSSCG00000027002.1	2,3,4	chr1:72650921-72651151|chr1:72656373-72722701	0	0	0	0	0	0	3	0	0	0	0	0	0	0	0	0	0	0	232.366	0	0	0	0	0	0	1	1	-2.39927	0.31381	0.708347	0	1	1	2.39927	0.336125	0.672453
circENSSSCG00000027207.1	chr10	9709751	9731216	-	3	ENSSSCT00000025633.1	ENSSSCG00000027207.1	4,3,2	chr10:9665857-9709751|chr10:9731216-9812448	0	0	0	2	3	0	0	0	0	0	0	0	0	0	0	240.703	349.911	0	0	0	0	0	0	0	-3.4974	0.158049	0.622196	0	1	1	3.4974	0.175202	0.508992	0	1	1
circENSSSCG00000027264.1	chr6	96922151	96932041	-	4	ENSSSCT00000024545.1	ENSSSCG00000027264.1	5,4,3,2	chr6:96909131-96922151|chr6:96932041-96944904	0	0	2	2	0	4	4	0	0	0	0	0	0	0	302.256	240.703	0	468.284	309.821	0	0	0	0	0	-0.847188	0.640793	0.917098	0.0981248	0.953375	1	3.73929	0.108304	0.451689	2.79397	0.210712	0.611265
circENSSSCG00000027415.1	chr6	9691061	9695218	+	3	ENSSSCT00000027541.1	ENSSSCG00000027415.1	2,3,4	chr6:9684973-9691061|chr6:9695218-9744447	0	0	2	3	6	6	2	2	0	1	1	2	0	0	302.256	361.054	699.823	702.427	154.911	242.731	0	284.243	290.72	484.524	-1.87328	0.0498559	0.486515	0.0737609	0.947368	1	0.682942	0.413861	0.671472	-1.2641	0.21317	0.611265
circENSSSCG00000027470.1	chr6	26048729	26050407	+	2	ENSSSCT00000025518.1	ENSSSCG00000027470.1	2,3	chr6:26043557-26048729|chr6:26050407-26053922	0	0	4	1	0	5	8	4	0	0	0	0	0	0	604.511	120.351	0	585.355	619.642	485.461	0	0	0	0	0.0255719	0.981556	1	-0.611865	0.68235	0.934066	3.73466	0.0894329	0.427861	4.3721	0.045355	0.461487
circENSSSCG00000027509.1	chr3	81726930	81732824	+	4	ENSSSCT00000029984.1	ENSSSCG00000027509.1	3,4,5,6	chr3:81720908-81726930|chr3:81732824-81741314	0	1	0	5	0	0	2	1	0	0	0	0	0	317.991	0	601.756	0	0	154.911	121.365	0	0	0	0	-0.975793	0.637945	0.915503	-0.0403738	0.974621	1	3.51755	0.149993	0.498604	2.58213	0.261987	0.649061
circENSSSCG00000027509.1_2	chr3	81741314	81750482	+	4	ENSSSCT00000029984.1	ENSSSCG00000027509.1	7,8,9,10	chr3:81732824-81741314|chr3:81750482-81757767	0	0	2	5	3	2	0	3	1	1	0	0	0	0	302.256	601.756	349.911	234.142	0	364.096	132.894	284.243	0	0	-1.39537	0.253337	0.651868	-0.117511	0.938867	1	1.90989	0.165307	0.505997	0.632025	0.674907	0.896311
circENSSSCG00000027556.1	chr13	106138562	106139375	+	2	ENSSSCT00000027533.1	ENSSSCG00000027556.1	2,3	chr13:106088680-106138562|chr13:106139375-106221531	1	2	3	9	8	9	8	13	7	0	3	1	286.316	635.982	453.383	1083.16	933.097	1053.64	619.642	1577.75	930.259	0	872.161	242.262	-1.14143	0.101454	0.581337	-1.12435	0.105332	0.561694	1.45092	0.0576553	0.379687	1.43384	0.0598515	0.490519
circENSSSCG00000027556.1_2	chr13	106138562	106221705	+	3	ENSSSCT00000027533.1	ENSSSCG00000027556.1	2,3,4	chr13:106088680-106138562|chr13:106221705-106243470	2	9	5	14	13	2	9	8	5	3	5	0	572.633	2861.92	755.639	1684.92	1516.28	234.142	697.097	970.923	664.47	852.728	1453.6	0	0.214545	0.788162	0.971794	0.764881	0.34617	0.732063	0.607194	0.478001	0.696937	0.0568577	0.947588	1
circENSSSCG00000027791.1	chr15	34770887	34771366	+	1	ENSSSCT00000024092.1	ENSSSCG00000027791.1	2	chr15:34741475-34770887|chr15:34771366-34820827	0	0	1	0	5	1	2	1	5	0	0	0	0	0	151.128	0	583.186	117.071	154.911	121.365	664.47	0	0	0	-1.52813	0.333943	0.712979	-1.87781	0.229927	0.666435	3.72842	0.0741395	0.394562	4.07809	0.0490252	0.468969
circENSSSCG00000027791.1_2	chr15	34820827	34832166	+	5	ENSSSCT00000024092.1	ENSSSCG00000027791.1	3,4,5,6,7	chr15:34771366-34820827|chr15:34832166-34851419	0	0	0	3	1	2	0	0	0	0	0	0	0	0	0	361.054	116.637	234.142	0	0	0	0	0	0	-3.74248	0.0592843	0.506225	0	1	1	3.74248	0.0740541	0.394562	0	1	1
circENSSSCG00000027791.1_3	chr15	34823349	34824299	+	2	ENSSSCT00000024092.1	ENSSSCG00000027791.1	4,5	chr15:34820906-34823349|chr15:34824299-34826563	3	2	0	0	1	0	0	1	0	0	0	0	858.949	635.982	0	0	116.637	0	0	121.365	0	0	0	0	3.08031	0.0850786	0.558788	3.11401	0.0797827	0.518525	1.60715	0.423001	0.673516	1.57344	0.432725	0.729046
circENSSSCG00000027791.1_4	chr15	34890618	34895324	+	3	ENSSSCT00000024092.1	ENSSSCG00000027791.1	13,14,15	chr15:34889476-34890618|chr15:34895324-34897186	1	0	1	1	1	4	0	0	0	1	0	2	286.316	0	151.128	120.351	116.637	468.284	0	0	0	284.243	0	484.524	-0.589603	0.637456	0.915503	3.14583	0.0423742	0.437012	-0.164101	0.888431	1	-3.89954	0.010736	0.299035
circENSSSCG00000027791.1_5	chr15	34890618	34897264	+	4	ENSSSCT00000024092.1	ENSSSCG00000027791.1	13,14,15,16	chr15:34889476-34890618|chr15:34897264-34897858	1	0	2	12	8	14	1	1	1	5	1	3	286.316	0	302.256	1444.22	933.097	1639	77.4553	121.365	132.894	1421.21	290.72	726.785	-2.48389	0.00141906	0.210129	0.963679	0.383032	0.764073	0.707088	0.258905	0.564331	-2.74048	0.00193417	0.15446
circENSSSCG00000027791.1_6	chr15	34890618	34898026	+	5	ENSSSCT00000024092.1	ENSSSCG00000027791.1	13,14,15,16,17	chr15:34889476-34890618|chr15:34898026-34898822	6	0	9	10	17	7	8	4	2	0	5	2	1717.9	0	1360.15	1203.51	1982.83	819.498	619.642	485.461	265.788	0	1453.6	484.524	-0.301833	0.663575	0.930724	1.16133	0.12087	0.579624	1.04779	0.174414	0.508992	-0.415377	0.620469	0.845949
circENSSSCG00000027791.1_7	chr15	34890618	34917823	+	10	ENSSSCT00000024092.1	ENSSSCG00000027791.1	13,14,15,16,17,18,19,20,21,22	chr15:34889476-34890618|chr15:34917823-34922157	3	0	1	0	3	0	0	0	0	0	0	0	858.949	0	151.128	0	349.911	0	0	0	0	0	0	0	1.36797	0.507558	0.817163	4.19912	0.0441576	0.437012	2.83115	0.237193	0.557553	0	1	1
circENSSSCG00000027791.1_8	chr15	34917715	34922325	+	2	ENSSSCT00000024092.1	ENSSSCG00000027791.1	22,23	chr15:34901974-34917715|chr15:34922325-34928131	4	0	4	0	4	0	4	2	1	0	0	0	1145.27	0	604.511	0	466.549	0	309.821	242.731	132.894	0	0	0	1.8011	0.146865	0.618747	1.27247	0.285366	0.69783	3.19833	0.122936	0.46204	3.72696	0.0674342	0.500922
circENSSSCG00000027815.1	chr11	22187577	22193534	+	2	ENSSSCT00000025788.1	ENSSSCG00000027815.1	6,7	chr11:22181163-22187577|chr11:22193534-22194559	0	0	0	0	1	2	0	0	1	0	0	0	0	0	0	0	116.637	234.142	0	0	132.894	0	0	0	-2.83288	0.23948	0.651868	-1.66084	0.42075	0.783142	2.83288	0.260851	0.564331	1.66084	0.447127	0.732388
circENSSSCG00000027898.1	chr5	97653517	97653944	+	1	ENSSSCT00000001006.2	ENSSSCG00000027898.1	2	chr5:97597238-97653517|chr5:97653944-97667032	4	0	1	2	3	0	3	9	3	0	0	0	1145.27	0	151.128	240.703	349.911	0	232.366	1092.29	398.682	0	0	0	0.995257	0.416341	0.758464	-0.439507	0.699573	0.943666	3.49693	0.0860187	0.422021	4.9317	0.0101244	0.285184
circENSSSCG00000027898.1_2	chr5	97653517	97667230	+	2	ENSSSCT00000001006.2	ENSSSCG00000027898.1	2,3	chr5:97597238-97653517|chr5:97667230-97673599	0	0	0	3	1	3	3	0	0	0	3	0	0	0	0	361.054	116.637	351.213	232.366	0	0	0	872.161	0	-3.94804	0.0510519	0.48914	-2.51284	0.198705	0.644091	-0.0257102	0.986664	1	-1.46091	0.335349	0.672453
circENSSSCG00000027898.1_3	chr5	97681888	97686545	+	3	ENSSSCT00000001006.2	ENSSSCG00000027898.1	8,9,10	chr5:97680752-97681888|chr5:97686545-97688076	1	0	0	0	3	0	0	0	2	0	0	0	286.316	0	0	0	349.911	0	0	0	265.788	0	0	0	-0.302947	0.908674	1	0.0719572	0.979398	1	2.82965	0.295101	0.579143	2.45474	0.343912	0.676355
circENSSSCG00000027942.1	chr4	134737115	134751099	+	2	ENSSSCT00000007543.2	ENSSSCG00000027942.1	2,3	chr4:134731542-134737115|chr4:134751099-134762146	1	0	0	3	1	0	1	0	0	0	0	0	286.316	0	0	361.054	116.637	0	77.4553	0	0	0	0	0	-0.767823	0.675585	0.934996	1.06772	0.582991	0.876317	3.21685	0.155714	0.501382	1.38131	0.462529	0.734227
circENSSSCG00000028011.1	chr15	35130963	35132183	+	2	ENSSSCT00000026618.1	ENSSSCG00000028011.1	2,3	chr15:35125659-35130963|chr15:35132183-35139300	0	0	0	0	2	0	0	0	0	0	0	0	0	0	0	0	233.274	0	0	0	0	0	0	0	-2.34344	0.330758	0.708887	0	1	1	2.34344	0.352977	0.619789	0	1	1
circENSSSCG00000028035.1	chr9	70888222	70891949	+	3	ENSSSCT00000027953.1	ENSSSCG00000028035.1	8,9,10	chr9:70887113-70888222|chr9:70891949-70896771	0	0	2	0	1	1	0	0	0	0	0	2	0	0	302.256	0	116.637	117.071	0	0	0	0	0	484.524	0.570654	0.730941	0.949643	2.91892	0.0833748	0.527306	-0.963022	0.577222	0.786524	-3.31129	0.0594922	0.48997
circENSSSCG00000028035.1_2	chr9	70888222	70899574	+	6	ENSSSCT00000027953.1	ENSSSCG00000028035.1	8,9,10,11,12,13	chr9:70887113-70888222|chr9:70899574-70900348	0	0	8	0	0	5	0	0	0	1	0	0	0	0	1209.02	0	0	585.355	0	0	0	284.243	0	0	1.07341	0.583218	0.874527	4.5611	0.0288592	0.388856	0.940277	0.659749	0.849914	-2.5474	0.168529	0.601796
circENSSSCG00000028035.1_3	chr9	70890417	70899574	+	5	ENSSSCT00000027953.1	ENSSSCG00000028035.1	9,10,11,12,13	chr9:70888285-70890417|chr9:70899574-70900348	0	3	1	0	0	6	3	0	0	0	0	0	0	953.973	151.128	0	0	702.427	232.366	0	0	0	0	0	0.557007	0.770692	0.963602	1.83956	0.342318	0.73161	3.72906	0.124884	0.464607	2.44651	0.275304	0.651471
circENSSSCG00000028047.1	chr6	110745662	110748671	-	2	ENSSSCT00000024859.1	ENSSSCG00000028047.1	7,6	chr6:110742763-110745662|chr6:110748671-110755336	2	1	10	1	1	2	6	2	4	5	0	1	572.633	317.991	1511.28	120.351	116.637	234.142	464.732	242.731	531.576	1421.21	0	242.262	2.36369	0.00935725	0.344828	1.06378	0.18201	0.632206	-1.67979	0.0975907	0.437332	-0.379888	0.671228	0.89284
circENSSSCG00000028074.1	chr6	81320443	81322888	-	2	ENSSSCT00000025839.1	ENSSSCG00000028074.1	7,6	chr6:81308413-81320443|chr6:81322888-81334002	0	1	0	3	3	5	1	2	0	0	0	0	0	317.991	0	361.054	349.911	585.355	77.4553	242.731	0	0	0	0	-2.22036	0.0647347	0.524132	-0.36052	0.795658	0.988345	4.5615	0.00885188	0.199033	2.70166	0.169713	0.601796
circENSSSCG00000028074.1_2	chr6	81334002	81335252	-	2	ENSSSCT00000025839.1	ENSSSCG00000028074.1	5,4	chr6:81322888-81334002|chr6:81335252-81356433	0	0	1	0	2	2	10	0	4	0	0	6	0	0	151.128	0	233.274	234.142	774.553	0	531.576	0	0	1453.57	-1.01709	0.5489	0.849884	-2.41487	0.138163	0.598887	-1.57148	0.272183	0.564331	-0.173703	0.89754	1
circENSSSCG00000028182.1	chr5	91482490	91496070	+	8	ENSSSCT00000032012.1	ENSSSCG00000028182.1	6,7,8,9,10,11,12,13	chr5:91481273-91482490|chr5:91496070-91497405	0	0	0	0	2	1	3	0	0	0	0	0	0	0	0	0	233.274	117.071	232.366	0	0	0	0	0	-2.83213	0.220579	0.651868	-2.42857	0.269019	0.685027	2.83213	0.242961	0.561409	2.42857	0.294088	0.65626
circENSSSCG00000028260.1	chr2	52803494	52827726	+	4	ENSSSCT00000024151.1	ENSSSCG00000028260.1	3,4,5,6	chr2:52678012-52803494|chr2:52827726-52846486	0	0	0	4	0	1	1	1	1	0	2	0	0	0	0	481.405	0	117.071	77.4553	121.365	132.894	0	581.441	0	-3.50762	0.0770791	0.543935	-2.7301	0.165844	0.621823	0.0866581	0.952046	1	-0.690865	0.648206	0.870158
circENSSSCG00000028260.1_2	chr2	52846486	52849629	+	3	ENSSSCT00000024151.1	ENSSSCG00000028260.1	7,8,9	chr2:52827726-52846486|chr2:52849629-52852908	0	0	0	1	5	6	5	3	0	0	0	0	0	0	0	120.351	583.186	702.427	387.276	364.096	0	0	0	0	-4.67564	0.011381	0.351883	-3.87346	0.0401037	0.433638	4.67564	0.0161029	0.231324	3.87346	0.0525815	0.473818
circENSSSCG00000028406.1	chr1	225740192	225811866	-	10	ENSSSCT00000028872.1	ENSSSCG00000028406.1	11,10,9,8,7,6,5,4,3,2	chr1:225694820-225740192|chr1:225811866-225842455	0	0	0	0	5	2	5	0	3	0	1	0	0	0	0	0	583.186	234.142	387.276	0	398.682	0	290.72	0	-3.93474	0.049563	0.486515	-3.89747	0.0509298	0.443552	1.39458	0.389774	0.660071	1.35732	0.400049	0.723884
circENSSSCG00000028406.1_2	chr1	225771870	225808956	-	4	ENSSSCT00000028872.1	ENSSSCG00000028406.1	6,5,4,3	chr1:225764571-225771870|chr1:225808956-225811777	0	0	0	2	1	0	3	1	2	0	0	0	0	0	0	240.703	116.637	0	232.366	121.365	265.788	0	0	0	-2.84482	0.125865	0.602346	-3.56973	0.0460532	0.437012	2.84482	0.153152	0.498604	3.56973	0.0620113	0.494008
circENSSSCG00000028406.1_3	chr1	225790957	225811866	-	4	ENSSSCT00000028872.1	ENSSSCG00000028406.1	5,4,3,2	chr1:225771972-225790957|chr1:225811866-225842455	0	0	0	8	2	6	0	3	2	0	0	0	0	0	0	962.81	233.274	702.427	0	364.096	265.788	0	0	0	-5.08963	0.00525989	0.31183	-3.48751	0.0701733	0.495207	5.08963	0.00772974	0.190515	3.48751	0.0880864	0.531053
circENSSSCG00000028430.1	chr13	135093897	135148500	+	2	ENSSSCT00000026129.1	ENSSSCG00000028430.1	2,3	chr13:134958850-135093897|chr13:135148500-135218872	1	0	6	1	3	0	5	0	0	0	0	0	286.316	0	906.767	120.351	349.911	0	387.276	0	0	0	0	0	1.35581	0.371865	0.739279	1.47496	0.326491	0.715292	3.20278	0.146407	0.495833	3.08362	0.156017	0.592262
circENSSSCG00000028855.1	chr13	103784116	103799017	+	4	ENSSSCT00000025813.1	ENSSSCG00000028855.1	2,3,4,5	chr13:103767056-103784116|chr13:103799017-103810057	0	0	0	1	1	0	4	0	0	0	0	0	0	0	0	120.351	116.637	0	309.821	0	0	0	0	0	-2.35768	0.27808	0.670508	-2.76701	0.215063	0.659311	2.35768	0.30415	0.588633	2.76701	0.238354	0.63576
circENSSSCG00000028855.1_2	chr13	103789410	103799017	+	3	ENSSSCT00000025813.1	ENSSSCG00000028855.1	3,4,5	chr13:103784298-103789410|chr13:103799017-103810057	0	0	1	1	0	5	4	1	0	0	0	1	0	0	151.128	120.351	0	585.355	309.821	121.365	0	0	0	242.262	-1.54991	0.347174	0.730496	-0.998591	0.544657	0.850344	1.25686	0.449229	0.688481	0.705546	0.670058	0.891986
circENSSSCG00000029249.1	chr5	108192164	108225089	+	7	ENSSSCT00000026141.1	ENSSSCG00000029249.1	7,8,9,10,11,12,13	chr5:108188382-108192164|chr5:108225089-108228015	0	1	0	0	4	0	2	1	0	0	0	0	0	317.991	0	0	466.549	0	154.911	121.365	0	0	0	0	-0.659261	0.742456	0.953165	-0.0489357	0.970683	1	3.19438	0.179979	0.508992	2.58405	0.257838	0.647009
circENSSSCG00000029464.1	chr5	70006731	70074979	+	4	ENSSSCT00000023353.1	ENSSSCG00000029464.1	2,3,4,5	chr5:70002421-70006731|chr5:70074979-70079560	0	0	2	1	2	2	4	1	3	0	0	2	0	0	302.256	120.351	233.274	234.142	309.821	121.365	398.682	0	0	484.524	-0.40682	0.733941	0.949643	-0.86771	0.440527	0.787184	0.130995	0.913855	1	0.591885	0.602829	0.834648
circENSSSCG00000029465.1	chr11	320231	328992	-	5	ENSSSCT00000031907.1	ENSSSCG00000029465.1	7,6,5,4,3	chr11:317808-320231|chr11:328992-331775	0	1	3	0	0	0	2	0	3	0	0	0	0	317.991	453.383	0	0	0	154.911	0	398.682	0	0	0	3.93131	0.0249752	0.431191	0.543145	0.715807	0.948749	0	1	1	3.38817	0.120842	0.572872
circENSSSCG00000029762.1	chr6	110963355	110971391	+	3	ENSSSCT00000032134.1	ENSSSCG00000029762.1	7,8,9	chr6:110946189-110963355|chr6:110971391-110977672	0	0	0	0	4	3	3	0	1	0	0	0	0	0	0	0	466.549	351.213	232.366	0	132.894	0	0	0	-3.93504	0.0519492	0.48914	-2.94767	0.140195	0.600171	3.93504	0.0647139	0.384121	2.94767	0.164607	0.601565
circENSSSCG00000029771.1	chrX	94394185	94425070	-	2	ENSSSCT00000023372.1	ENSSSCG00000029771.1	3,2	None|chrX:94425070-94471962	0	3	0	1	3	2	0	1	0	0	0	0	0	953.973	0	120.351	349.911	234.142	0	121.365	0	0	0	0	0.227446	0.880704	1	2.40338	0.137011	0.597919	3.73316	0.0804382	0.409148	1.55723	0.427069	0.729046
circENSSSCG00000029992.1	chr2	42453091	42491493	-	3	ENSSSCT00000026235.1	ENSSSCG00000029992.1	5,4,3	chr2:42448025-42453091|chr2:42491493-42501972	0	0	0	0	0	0	4	0	0	0	0	0	0	0	0	0	0	0	309.821	0	0	0	0	0	0	1	1	-2.73845	0.260467	0.679981	0	1	1	2.73845	0.281642	0.651471
circENSSSCG00000030470.1	chr1	161192140	161193203	-	3	ENSSSCT00000024292.1	ENSSSCG00000030470.1	22,21,20	chr1:161180899-161192140|chr1:161193203-161194395	1	0	1	2	1	1	3	3	4	1	1	0	286.316	0	151.128	240.703	116.637	117.071	232.366	364.096	531.576	284.243	290.72	0	-0.0564409	0.96154	1	-1.14643	0.26279	0.682317	-0.182766	0.877552	1	0.907227	0.383602	0.709467
circENSSSCG00000030470.1_2	chr1	161192140	161194504	-	4	ENSSSCT00000024292.1	ENSSSCG00000030470.1	22,21,20,19	chr1:161180899-161192140|chr1:161194504-161199572	0	0	2	1	2	2	1	0	0	0	0	1	0	0	302.256	120.351	233.274	234.142	77.4553	0	0	0	0	242.262	-0.412621	0.733102	0.949643	1.61348	0.250119	0.677032	0.990873	0.472775	0.693541	-1.03523	0.518896	0.774081
circENSSSCG00000030470.1_3	chr1	161192140	161204051	-	8	ENSSSCT00000024292.1	ENSSSCG00000030470.1	22,21,20,19,18,17,16,15	chr1:161180899-161192140|chr1:161204051-161219333	0	1	2	2	0	1	1	2	2	0	0	0	0	317.991	302.256	240.703	0	117.071	77.4553	242.731	265.788	0	0	0	0.804014	0.502715	0.811811	0.252887	0.819855	1	2.84533	0.153822	0.498604	3.39645	0.0807327	0.519735
circEP300	chr5	4603985	4608833	-	4	ENSSSCT00000026332.1	EP300	12,11,10,9	chr5:4601836-4603985|chr5:4608833-4610077	1	0	1	1	0	5	0	0	0	0	0	1	286.316	0	151.128	120.351	0	585.355	0	0	0	0	0	242.262	-0.59737	0.704503	0.944465	3.13736	0.0629965	0.476313	1.26035	0.461572	0.690317	-2.47438	0.141589	0.578381
circEP300_2	chr5	4607779	4611101	-	4	ENSSSCT00000026332.1	EP300	10,9,8,7	chr5:4604623-4607779|chr5:4611101-4617233	0	0	0	6	1	0	0	0	2	0	0	0	0	0	0	722.108	116.637	0	0	0	265.788	0	0	0	-3.96268	0.103461	0.581337	-2.4232	0.272205	0.686037	3.96268	0.117263	0.458743	2.4232	0.297834	0.656925
circEP400	chr14	24811226	24812988	-	3	ENSSSCT00000024610.1	EP400	13,12,11	chr14:24810684-24811226|chr14:24812988-24814810	0	0	1	0	1	1	2	0	0	0	0	0	0	0	151.128	0	116.637	117.071	154.911	0	0	0	0	0	-0.187136	0.925393	1	0.109048	0.949641	1	2.34848	0.273236	0.564331	2.05229	0.318636	0.6684
circEPB41L4A	chr2	122033112	122041690	-	3	ENSSSCT00000015527.2	EPB41L4A	10,9,8	chr2:122010500-122033112|chr2:122041690-122060726	0	0	1	0	1	2	2	1	0	0	0	0	0	0	151.128	0	116.637	234.142	154.911	121.365	0	0	0	0	-0.624047	0.6992	0.94366	-0.413446	0.796427	0.988749	2.83703	0.172464	0.508992	2.62643	0.201334	0.608541
circEPHA3	chr13	177703888	177704549	-	1	ENSSSCT00000022760.1	EPHA3	3	chr13:177535411-177703888|chr13:177704549-177791008	2	2	1	13	10	3	2	0	0	5	0	4	572.633	635.982	151.128	1564.57	1166.37	351.213	154.911	0	0	1421.21	0	969.047	-1.30237	0.141683	0.613453	2.31245	0.0456064	0.437012	0.342584	0.672123	0.85748	-3.27223	0.00197478	0.15446
circEPHB2	chr6	74828914	74830567	+	2	ENSSSCT00000003918.2	EPHB2	3,4	chr6:74755024-74828914|chr6:74830567-74848661	0	0	2	0	0	2	0	0	0	0	0	0	0	0	302.256	0	0	234.142	0	0	0	0	0	0	0.466854	0.829292	0.994556	2.81437	0.148058	0.605337	2.34752	0.325272	0.608774	0	1	1
circEPRS	chr10	11694053	11696196	-	4	ENSSSCT00000011838.2	EPRS	17,16,15,14	chr10:11690263-11694053|chr10:11696196-11700229	0	0	0	1	1	0	1	0	0	0	0	0	0	0	0	120.351	116.637	0	77.4553	0	0	0	0	0	-2.35821	0.318342	0.704982	-1.31716	0.481136	0.805894	2.35821	0.341272	0.616461	1.31716	0.506727	0.767047
circEPRS_2	chr10	11705430	11717419	-	8	ENSSSCT00000011838.2	EPRS	12,11,10,9,8,7,6,5	chr10:11700340-11705430|chr10:11717419-11718595	0	0	2	0	1	2	5	2	0	0	0	0	0	0	302.256	0	116.637	234.142	387.276	242.731	0	0	0	0	0.135157	0.921378	1	-0.677583	0.644034	0.911522	2.83634	0.179959	0.508992	3.64908	0.0812361	0.519735
circEPS15	chr6	148405580	148422837	+	5	ENSSSCT00000004284.2	EPS15	9,10,11,12,13	chr6:148403219-148405580|chr6:148422837-148440632	3	0	7	2	5	2	31	24	13	0	0	1	858.949	0	1057.89	240.703	583.186	234.142	2401.11	2912.77	1727.62	0	0	242.262	0.993844	0.181286	0.639654	-1.67737	0.00475018	0.18094	1.77511	0.143014	0.494719	4.44632	1.20321e-06	0.000576167
circEPS15_2	chr6	148401538	148422837	+	7	ENSSSCT00000004284.2	EPS15	7,8,9,10,11,12,13	chr6:148398425-148401538|chr6:148422837-148440632	1	1	0	11	13	7	6	9	1	1	1	2	286.316	317.991	0	1323.86	1516.28	819.498	464.732	1092.29	132.894	284.243	290.72	484.524	-2.8178	0.00192469	0.222468	-1.72605	0.0807993	0.518849	1.71018	0.0325451	0.314255	0.618435	0.475585	0.744239
circEPS15_3	chr6	148401538	148417858	+	6	ENSSSCT00000004284.2	EPS15	7,8,9,10,11,12	chr6:148398425-148401538|chr6:148417858-148422751	0	0	1	1	0	0	3	2	0	0	0	0	0	0	151.128	120.351	0	0	232.366	242.731	0	0	0	0	0.560592	0.739843	0.951344	-1.07933	0.520463	0.829968	1.61875	0.413629	0.671472	3.25867	0.128798	0.574282
circEPS15_4	chr6	148405580	148440705	+	6	ENSSSCT00000004284.2	EPS15	9,10,11,12,13,14	chr6:148403219-148405580|chr6:148440705-148453959	0	0	0	0	0	0	6	1	0	0	1	0	0	0	0	0	0	0	464.732	121.365	0	0	290.72	0	0	1	1	-3.53826	0.123617	0.580899	-2.55854	0.173436	0.508992	0.979723	0.629478	0.853552
circEPS15_5	chr6	148414519	148422837	+	4	ENSSSCT00000004284.2	EPS15	10,11,12,13	chr6:148405640-148414519|chr6:148422837-148440632	1	0	3	2	1	3	7	7	1	0	1	1	286.316	0	453.383	240.703	116.637	351.213	542.187	849.557	132.894	0	290.72	242.262	0.269805	0.788737	0.971794	-0.798787	0.387289	0.764073	0.357877	0.760378	0.922471	1.42647	0.178535	0.603178
circEPS15_6	chr6	148463816	148486340	+	8	ENSSSCT00000004284.2	EPS15	17,18,19,20,21,22,23,24	chr6:148454719-148463816|chr6:148486340-148489285	0	0	0	0	0	3	0	0	0	0	0	0	0	0	0	0	0	351.213	0	0	0	0	0	0	-2.83389	0.255036	0.651868	0	1	1	2.83389	0.275588	0.564331	0	1	1
circEPS15L1	chr2	60798516	60806887	+	4	ENSSSCT00000015136.2	EPS15L1	4,5,6,7	chr2:60798037-60798516|chr2:60806887-60810824	0	0	1	1	2	2	0	0	0	0	0	0	0	0	151.128	120.351	233.274	234.142	0	0	0	0	0	0	-1.23661	0.372291	0.739279	2.25781	0.141836	0.602161	3.49442	0.072864	0.394405	0	1	1
circEPT1	chr3	119574323	119590533	-	7	ENSSSCT00000023702.1	EPT1	9,8,7,6,5,4,3	chr3:119572740-119574323|chr3:119590533-119591123	3	2	7	5	5	3	8	4	8	0	0	2	858.949	635.982	1057.89	601.756	583.186	351.213	619.642	485.461	1063.15	0	0	484.524	0.778296	0.236654	0.651868	0.326961	0.597651	0.886819	1.41931	0.145926	0.495833	1.87064	0.0422905	0.452697
circERBB2IP	chr16	47892128	47901568	-	2	ENSSSCT00000035098.1	ERBB2IP	4,3	chr16:47889245-47892128|chr16:47901568-47903917	1	0	4	0	4	5	0	1	0	0	0	0	286.316	0	604.511	0	466.549	585.355	0	121.365	0	0	0	0	-0.0874608	0.948878	1	2.63713	0.0769614	0.513893	4.27672	0.0390195	0.33183	1.55213	0.425771	0.729046
circERBB2IP_2	chr16	47892128	47904101	-	3	ENSSSCT00000035098.1	ERBB2IP	4,3,2	chr16:47889245-47892128|chr16:47904101-47906730	3	2	25	17	27	21	6	9	7	0	3	3	858.949	635.982	3778.19	2045.97	3149.2	2458.49	464.732	1092.29	930.259	0	872.161	726.785	-0.407242	0.524365	0.832625	1.22844	0.0721094	0.496845	2.20527	0.00452964	0.15033	0.569585	0.494705	0.764058
circERBB2IP_3	chr16	47900019	47901568	-	1	ENSSSCT00000035098.1	ERBB2IP	3	chr16:47892248-47900019|chr16:47901568-47903917	0	0	5	4	7	3	9	2	4	1	0	0	0	0	755.639	481.405	816.46	351.213	697.097	242.731	531.576	284.243	0	0	-0.666827	0.464592	0.78497	-0.544581	0.549384	0.85321	2.37459	0.0525405	0.365828	2.25234	0.0664189	0.500822
circERBB2IP_4	chr16	47900019	47904101	-	2	ENSSSCT00000035098.1	ERBB2IP	3,2	chr16:47892248-47900019|chr16:47904101-47906730	2	4	7	8	8	13	8	7	7	5	0	3	572.633	1271.96	1057.89	962.81	933.097	1521.92	619.642	849.557	930.259	1421.21	0	726.785	-0.220678	0.703061	0.944465	0.315176	0.600112	0.888505	0.647801	0.310634	0.596668	0.111947	0.867036	1
circERC1	chr5	70576775	70588176	+	4	ENSSSCT00000000819.2	ERC1	4,5,6,7	chr5:70565956-70576775|chr5:70588176-70595713	0	0	0	0	1	2	4	0	0	0	0	0	0	0	0	0	116.637	234.142	309.821	0	0	0	0	0	-2.83318	0.225962	0.651868	-2.7553	0.231177	0.666435	2.83318	0.248044	0.564331	2.7553	0.253739	0.647009
circERC1_2	chr5	70576775	70595881	+	5	ENSSSCT00000000819.2	ERC1	4,5,6,7,8	chr5:70565956-70576775|chr5:70595881-70617985	0	0	0	4	2	5	5	0	0	0	0	0	0	0	0	481.405	233.274	585.355	387.276	0	0	0	0	0	-4.56389	0.0182482	0.382299	-3.12627	0.108309	0.562272	4.56389	0.0244709	0.282558	3.12627	0.130729	0.574282
circERC1_3	chr5	70588008	70629435	+	6	ENSSSCT00000000819.2	ERC1	7,8,9,10,11,12	chr5:70584206-70588008|chr5:70629435-70647419	2	0	1	3	0	1	2	0	1	0	0	0	572.633	0	151.128	361.054	0	117.071	154.911	0	132.894	0	0	0	0.516869	0.705381	0.945019	1.0889	0.434981	0.783793	3.21448	0.121818	0.460419	2.64245	0.199723	0.608094
circERC1_4	chr5	70620859	70647555	+	3	ENSSSCT00000000819.2	ERC1	11,12,13	chr5:70619507-70620859|chr5:70647555-70663865	0	0	1	2	1	2	1	0	0	0	0	0	0	0	151.128	240.703	116.637	234.142	77.4553	0	0	0	0	0	-1.22417	0.359624	0.735484	0.800583	0.604537	0.891121	3.49711	0.0674593	0.39084	1.47235	0.426153	0.729046
circERCC6	chr14	97974693	97977123	-	2	ENSSSCT00000011375.2	ERCC6	3,2	chr14:97969649-97974693|chr14:97977123-97979225	0	0	0	0	0	1	3	0	0	0	0	0	0	0	0	0	0	117.071	232.366	0	0	0	0	0	-1.60689	0.431726	0.762693	-2.40758	0.299004	0.701987	1.60689	0.457505	0.689477	2.40758	0.322232	0.669693
circERCC6L2	chr10	30396526	30411370	-	4	ENSSSCT00000011974.2	ERCC6L2	14,13,12,11	chr10:30386570-30396526|chr10:30411370-30413321	0	1	2	10	0	0	10	4	1	1	0	0	0	317.991	302.256	1203.51	0	0	774.553	485.461	132.894	284.243	0	0	-0.839021	0.560048	0.857206	-1.0752	0.449681	0.792497	1.91816	0.24086	0.559503	2.15434	0.183233	0.606245
circERCC6L2_2	chr10	30396526	30428690	-	9	ENSSSCT00000011974.2	ERCC6L2	14,13,12,11,10,9,8,7,6	chr10:30386570-30396526|chr10:30428690-30432837	0	0	1	7	8	5	2	2	1	0	0	1	0	0	151.128	842.459	933.097	585.355	154.911	242.731	132.894	0	0	242.262	-3.10012	0.00179813	0.222468	-1.04409	0.409323	0.77517	2.88452	0.00477483	0.152736	0.828478	0.524445	0.774081
circERCC6L2_3	chr10	30396526	30434042	-	11	ENSSSCT00000011974.2	ERCC6L2	14,13,12,11,10,9,8,7,6,5,4	chr10:30386570-30396526|chr10:30434042-30451188	0	0	0	6	7	3	12	0	0	0	0	0	0	0	0	722.108	816.46	351.213	929.463	0	0	0	0	0	-5.08473	0.0111041	0.351883	-4.20127	0.0360162	0.41851	5.08473	0.0147716	0.22716	4.20127	0.0457975	0.461487
circERG	chr13	212098132	212100168	-	3	ENSSSCT00000023594.1	ERG	8,7,6	chr13:212087247-212098132|chr13:212100168-212108833	0	1	0	2	5	1	0	0	0	0	1	1	0	317.991	0	240.703	583.186	117.071	0	0	0	0	290.72	242.262	-1.73934	0.211309	0.651837	2.38372	0.135395	0.596377	0.745273	0.554314	0.765264	-3.37779	0.0336373	0.440027
circERGIC1	chr16	55612239	55614932	-	2	ENSSSCT00000018498.2	ERGIC1	9,8	chr16:55599206-55612239|chr16:55614932-55621371	0	0	6	0	2	1	2	0	1	1	1	1	0	0	906.767	0	233.274	117.071	154.911	0	132.894	284.243	290.72	242.262	1.52338	0.212132	0.651837	1.71211	0.160313	0.612742	-1.08787	0.415809	0.672447	-1.2766	0.3395	0.674952
circERGIC2	chr5	47663196	47675595	+	4	ENSSSCT00000000578.2	ERGIC2	3,4,5,6	chr5:47661165-47663196|chr5:47675595-47686381	0	0	2	0	4	6	4	1	3	0	0	0	0	0	302.256	0	466.549	702.427	309.821	121.365	398.682	0	0	0	-1.41635	0.285728	0.677885	-0.94705	0.482526	0.805894	4.42198	0.0252543	0.286957	3.95268	0.0489765	0.468969
circERI3	chr6	154523122	154552424	+	4	ENSSSCT00000004352.2	ERI3	3,4,5,6	chr6:154512030-154523122|chr6:154552424-154567861	2	2	17	8	10	10	20	14	6	1	2	3	572.633	635.982	2569.17	962.81	1166.37	1170.71	1549.11	1699.11	797.364	284.243	581.441	726.785	0.36364	0.545659	0.847567	0.0576299	0.920613	1	1.00498	0.175376	0.508992	1.31099	0.0691864	0.505542
circERI3_2	chr6	154541184	154552424	+	3	ENSSSCT00000004352.2	ERI3	4,5,6	chr6:154523400-154541184|chr6:154552424-154567861	4	1	15	18	5	6	24	5	19	2	2	4	1145.27	317.991	2266.92	2166.32	583.186	702.427	1858.93	606.827	2524.99	568.485	581.441	969.047	0.217908	0.768348	0.962445	-0.309752	0.67076	0.931277	0.669028	0.4162	0.672447	1.19669	0.137157	0.576499
circERMP1	chr1	242065636	242066517	+	2	ENSSSCT00000005739.2	ERMP1	5,6	chr1:242053436-242065636|chr1:242066517-242073886	1	2	1	0	1	1	2	0	1	0	0	1	286.316	635.982	151.128	0	116.637	117.071	154.911	0	132.894	0	0	242.262	1.78303	0.133352	0.602346	1.46728	0.193175	0.640478	-0.151407	0.91997	1	0.164344	0.909553	1
circERMP1_2	chr1	242065636	242076349	+	4	ENSSSCT00000005739.2	ERMP1	5,6,7,8	chr1:242053436-242065636|chr1:242076349-242080070	0	0	1	1	5	0	2	1	0	0	0	0	0	0	151.128	120.351	583.186	0	154.911	121.365	0	0	0	0	-1.55118	0.35224	0.730496	-0.430181	0.802741	0.992911	3.73193	0.0827354	0.415661	2.61093	0.216726	0.614882
circESCO1	chr6	99212304	99243627	-	7	ENSSSCT00000004099.2	ESCO1	10,9,8,7,6,5,4	chr6:99205746-99212304|chr6:99243627-99256998	1	1	3	5	2	3	3	3	3	0	1	1	286.316	317.991	453.383	601.756	233.274	351.213	232.366	364.096	398.682	0	290.72	242.262	-0.068613	0.932505	1	0.227521	0.780682	0.981304	1.04983	0.295549	0.579345	0.753695	0.463663	0.734227
circESCO1_2	chr6	99212304	99259476	-	9	ENSSSCT00000004099.2	ESCO1	10,9,8,7,6,5,4,3,2	chr6:99205746-99212304|chr6:99259476-99317434	0	1	0	3	1	2	6	5	11	2	1	1	0	317.991	0	361.054	116.637	234.142	464.732	606.827	1461.83	568.485	290.72	242.262	-1.39721	0.282557	0.676049	-3.1042	0.00560335	0.196288	-0.578047	0.568393	0.777623	1.12895	0.198263	0.608094
circESCO1_3	chr6	99216721	99243627	-	6	ENSSSCT00000004099.2	ESCO1	9,8,7,6,5,4	chr6:99212492-99216721|chr6:99243627-99256998	0	0	0	1	5	2	0	0	0	0	0	3	0	0	0	120.351	583.186	234.142	0	0	0	0	0	726.785	-4.1186	0.0458225	0.477033	0	1	1	0.27674	0.853852	0.990182	-3.84186	0.0246659	0.411343
circESCO1_4	chr6	99216721	99259476	-	8	ENSSSCT00000004099.2	ESCO1	9,8,7,6,5,4,3,2	chr6:99212492-99216721|chr6:99259476-99317434	0	0	0	0	1	0	1	0	4	0	0	0	0	0	0	0	116.637	0	77.4553	0	531.576	0	0	0	-1.60539	0.414711	0.756728	-3.51111	0.147486	0.605337	1.60539	0.442543	0.685003	3.51111	0.164748	0.601565
circESCO1_5	chr6	99220824	99243627	-	5	ENSSSCT00000004099.2	ESCO1	8,7,6,5,4	chr6:99216865-99220824|chr6:99243627-99256998	0	0	4	4	0	2	0	0	1	2	0	0	0	0	604.511	481.405	0	234.142	0	0	132.894	568.485	0	0	0.000271931	0.995016	1	2.14535	0.197246	0.643371	0.330619	0.841426	0.983767	-1.81446	0.302015	0.658229
circESCO1_6	chr6	99236963	99243627	-	4	ENSSSCT00000004099.2	ESCO1	7,6,5,4	chr6:99220914-99236963|chr6:99243627-99256998	1	0	4	1	10	7	6	1	3	1	1	0	286.316	0	604.511	120.351	1166.37	819.498	464.732	121.365	398.682	284.243	290.72	0	-0.979034	0.305256	0.699078	0.0433327	0.963301	1	1.84102	0.0975115	0.437332	0.818649	0.484814	0.753056
circESCO1_7	chr6	99240508	99243627	-	3	ENSSSCT00000004099.2	ESCO1	6,5,4	chr6:99237095-99240508|chr6:99243627-99256998	0	0	0	0	1	0	1	0	2	0	1	2	0	0	0	0	116.637	0	77.4553	0	265.788	0	290.72	484.524	-1.60912	0.37572	0.740174	-2.74393	0.159003	0.612742	-2.28509	0.132285	0.477824	-1.15028	0.406494	0.729046
circESCO1_8	chr6	99240508	99259476	-	5	ENSSSCT00000004099.2	ESCO1	6,5,4,3,2	chr6:99237095-99240508|chr6:99259476-99317434	0	1	1	3	4	0	2	2	5	0	0	0	0	317.991	151.128	361.054	466.549	0	154.911	242.731	664.47	0	0	0	-0.785517	0.539694	0.842254	-1.06805	0.397723	0.768396	3.94608	0.0444854	0.341855	4.22862	0.0288528	0.426251
circESD	chr11	21001196	21003912	+	3	ENSSSCT00000010306.2	ESD	5,6,7	chr11:20999235-21001196|chr11:21003912-21007413	0	0	3	2	2	0	2	0	1	0	0	0	0	0	453.383	240.703	233.274	0	154.911	0	132.894	0	0	0	0.240494	0.860283	1	0.81351	0.57106	0.866936	3.209	0.130627	0.473875	2.63599	0.208171	0.611265
circESYT2	chr18	814123	842224	+	12	ENSSSCT00000017863.2	ESYT2	1,2,3,4,5,6,7,8,9,10,11,12	None|chr18:842224-847477	0	0	0	0	3	0	0	0	0	0	0	0	0	0	0	0	349.911	0	0	0	0	0	0	0	-2.83002	0.255536	0.651868	0	1	1	2.83002	0.276105	0.564331	0	1	1
circETFA	chr7	60959605	60962443	+	3	ENSSSCT00000002087.2	ETFA	2,3,4	chr7:60946412-60959605|chr7:60962443-60967185	1	0	9	3	4	4	6	1	1	0	1	2	286.316	0	1360.15	361.054	466.549	468.284	464.732	121.365	132.894	0	290.72	484.524	0.568664	0.519889	0.828264	1.26201	0.168703	0.625008	0.65562	0.539318	0.749501	-0.0377253	0.974651	1
circETFA_2	chr7	60959605	60968464	+	5	ENSSSCT00000002087.2	ETFA	2,3,4,5,6	chr7:60946412-60959605|chr7:60968464-60969384	0	0	3	0	0	3	0	0	2	0	0	0	0	0	453.383	0	0	351.213	0	0	265.788	0	0	0	0.449832	0.843681	0.996861	0.84141	0.713026	0.94656	2.83404	0.265876	0.564331	2.44246	0.320786	0.669693
circETFA_3	chr7	60959605	60977347	+	8	ENSSSCT00000002087.2	ETFA	2,3,4,5,6,7,8,9	chr7:60946412-60959605|chr7:60977347-61015703	1	0	2	2	4	1	9	0	0	1	0	0	286.316	0	302.256	240.703	466.549	117.071	697.097	0	0	284.243	0	0	-0.346164	0.802991	0.979864	-0.249101	0.852469	1	1.41112	0.374052	0.640685	1.31406	0.400282	0.723884
circETFA_4	chr7	60967185	60977347	+	5	ENSSSCT00000002087.2	ETFA	5,6,7,8,9	chr7:60962443-60967185|chr7:60977347-61015703	3	2	4	10	13	8	5	1	7	0	0	4	858.949	635.982	604.511	1203.51	1516.28	936.569	387.276	121.365	930.259	0	0	969.047	-0.81184	0.230169	0.651868	0.549361	0.462358	0.802145	1.72806	0.0286439	0.300483	0.366861	0.678198	0.897835
circETFDH	chr8	50040511	50049790	+	4	ENSSSCT00000009718.2	ETFDH	4,5,6,7	chr8:50039153-50040511|chr8:50049790-50051222	0	0	2	6	8	2	1	1	2	0	0	0	0	0	302.256	722.108	933.097	234.142	77.4553	121.365	265.788	0	0	0	-2.01472	0.0640808	0.523467	-0.0272468	0.990031	1	5.08422	0.00322676	0.132179	3.09674	0.116637	0.572872
circETFDH_2	chr8	50049643	50058700	+	6	ENSSSCT00000009718.2	ETFDH	7,8,9,10,11,12	chr8:50044267-50049643|chr8:50058700-50060176	1	0	1	3	4	3	2	0	0	0	0	0	286.316	0	151.128	361.054	466.549	351.213	154.911	0	0	0	0	0	-1.28008	0.208164	0.651837	0.960869	0.451696	0.794796	4.43045	0.00987442	0.205584	2.18951	0.260785	0.647709
circEXOC1	chr8	58349145	58366177	-	7	ENSSSCT00000024124.1	EXOC1	8,7,6,5,4,3,2	chr8:58340401-58349145|chr8:58366177-58371595	0	0	2	1	1	1	3	3	1	0	1	0	0	0	302.256	120.351	116.637	117.071	232.366	364.096	132.894	0	290.72	0	0.267182	0.823977	0.991167	-0.673811	0.539019	0.846273	0.322087	0.820822	0.973771	1.26308	0.323948	0.672159
circEXOC1_2	chr8	58350411	58366177	-	5	ENSSSCT00000024124.1	EXOC1	6,5,4,3,2	chr8:58349999-58350411|chr8:58366177-58371595	2	0	4	2	0	0	3	0	0	0	0	0	572.633	0	604.511	240.703	0	0	232.366	0	0	0	0	0	2.11976	0.186154	0.646833	1.99668	0.201823	0.646143	2.36641	0.270768	0.564331	2.48949	0.241675	0.637367
circEXOC2	chr7	82091	105997	-	10	ENSSSCT00000001075.2	EXOC2	22,21,20,19,18,17,16,15,14,13	chr7:59598-82091|chr7:105997-112297	0	2	4	15	11	4	4	6	3	0	1	0	0	635.982	604.511	1805.27	1283.01	468.284	309.821	728.192	398.682	0	290.72	0	-1.38952	0.0734051	0.530288	-0.0804882	0.925794	1	3.45329	0.00138885	0.0833799	2.14426	0.0751693	0.512514
[truncated: 2,104 more rows]
