# Supplementary material for: Identification of CircRNA-Associated ceRNA Networks Using Longissimus Thoracis of Pigs of Different Breeds and Growth Stages
Source: Research Square preprint supplement (doi:10.21203/rs.3.rs-852221/v1), 2021-11-30
Supplement: Supplementary file 7 [file c84fff252df311c4e48c41cb.xlsx]

## Sheet: A
Predicted target analysis of DE miRNAs with DE coding genes that related to myogenesis between LT1D and LW1D samples
Query	Ref	Binding
miR-1285	MEF2D	Query: 3' tgccccagagcgatacAACGGGTc 5'
		|||||||
		Ref: 5' catgcatcccagagccTTGCCCAg 3'
miR-182	CITED2	Query: 3' tcacactcAAGATGGTAACGGTTt 5'
		||:|| : |||||||
		Ref: 5' ttattctaTTTTAAT-TTGCCAAt 3'
miR-182	FOXN2	Query: 3' tcacactcaAGATGGT-AACGGTTt 5'
		| ||: | |||||||
		Ref: 5' gtataaaaaTGTATAATTTGCCAAt 3'
miR-182	MEF2D	Query: 3' tcACAC-TCAAGA-TGGT-AACGGTTt 5'
		| || || || : || |||||||
		Ref: 5' ccTCTGAAGAACTGGGCATTTGCCAAa 3'
miR-221-3p	FOXN2	Query: 3' tttgggtcgtcTGTTACATCGa 5'
		|::|||||||
		Ref: 5' tcaatatgttaATGATGTAGCc 3'
miR-221-3p	FOXN2	Query: 3' tttgggtcgtctGTTACATCGa 5'
		:||||||||
		Ref: 5' tatcttcttttcTAATGTAGCa 3'
miR-30a-3p	MEF2D	Query: 3' cgacgttTGTAGGCTGACTTTc 5'
		||| : ||||||||
		Ref: 5' accccttACAATAGACTGAAAc 3'
miR-30e-3p	MEF2D	Query: 3' cgacattTGTAGGCTGACTTTc 5'
		||| : ||||||||
		Ref: 5' accccttACAATAGACTGAAAc 3'

## Sheet: B
Predicted target analysis of DE miRNAs with DE circRNAs between LT1D and LT90D samples
Query	Ref	Binding
circNDFIP2	let-7i	Query: 3' tcGTGTT-TGATGATGGAGt 5'
		:|||: ::|:|||||||
		Ref: 5' ccTACAGTGTTGCTACCTCc 3'
circTRIP11	let-7i	Query: 3' tcgtgttTGATGATGGAGt 5'
		:||:|||||||
		Ref: 5' ttcgatcGCTGCTACCTCa 3'
circAGO4	miR-122	Query: 3' tgtttGTGGTA-ACAGTGTGAGGt 5'
		| |||| | :|||||||
		Ref: 5' cttccCTCCATGAGGTACACTCCa 3'
circAMOTL1	miR-125b	Query: 3' agTGTTCAATCCCAGAGTCCCt 5'
		||| | | |||||||
		Ref: 5' caACACCTCCCTGGCTCAGGGa 3'
circGPAT3	miR-125b	Query: 3' agtgttcaatcccAGAGTCCCt 5'
		||||||||
		Ref: 5' gtgtcctcctgccTCTCAGGGt 3'
circTRIP11	miR-125b	Query: 3' agtgttcaatccCAGAGTCCCt 5'
		| |||||||
		Ref: 5' aggaactggaacGACTCAGGGa 3'
circMYBPC2	miR-127	Query: 3' tcGGTTCGAGTCTGCCTAGGCt 5'
		||||| || :|||||||
		Ref: 5' caCCAAG--AAGCTGGATCCGg 3'
circAGO4	miR-128	Query: 3' tttCTCTGGCCAAGTGACACt 5'
		|||: :| |||||||
		Ref: 5' gttGAGG-TGACCCACTGTGg 3'
circKANSL1L-3	miR-128	Query: 3' ttTCTCTG-GCCAA-GTGACACt 5'
		| ||:| : || |||||||
		Ref: 5' aaAAAGGCTTTATTGCACTGTGc 3'
circKANSL1L_2	miR-128	Query: 3' ttTCTCTG-GCCAA-GTGACACt 5'
		| ||:| : || |||||||
		Ref: 5' aaAAAGGCTTTATTGCACTGTGc 3'
circKANSL1L	miR-128	Query: 3' ttTCTCTG-GCCAA-GTGACACt 5'
		| ||:| : || |||||||
		Ref: 5' aaAAAGGCTTTATTGCACTGTGc 3'
circLIMCH1	miR-128	Query: 3' tttctctggccaaGTGACACt 5'
		|||||||
		Ref: 5' ccaagttcactgcCACTGTGg 3'
circWWP1	miR-128	Query: 3' tttctctggccaaGTGACACt 5'
		|||||||
		Ref: 5' atgtacctgcaaaCACTGTGg 3'
circENPEP	miR-1285	Query: 3' tgcCCCA-GAGCGATA-CAACGGGTc 5'
		|||| ||||:| ||||||||
		Ref: 5' agaGGGTGGCCGCTGTGGTTGCCCAt 3'
circAGL	miR-130a	Query: 3' tacggGAAAATTGTAACGTGAc 5'
		||||| ||||||||
		Ref: 5' ggataCTTTT---ATTGCACTt 3'
circKANSL1L_3	miR-130a	Query: 3' tacgggaaaattGTAACGTGAc 5'
		:||||||||
		Ref: 5' ttaaaaaggcttTATTGCACTg 3'
circKANSL1L_3	miR-130a	Query: 3' tacgggaaaaTTGT-AACGTGAc 5'
		|| | |||||||
		Ref: 5' cagaaatccaAAGATTTGCACTg 3'
circKANSL1L_2	miR-130a	Query: 3' tacgggaaaattGTAACGTGAc 5'
		:||||||||
		Ref: 5' ttaaaaaggcttTATTGCACTg 3'
circKANSL1L_2	miR-130a	Query: 3' tacgggaaaaTTGT-AACGTGAc 5'
		|| | |||||||
		Ref: 5' cagaaatccaAAGATTTGCACTg 3'
circKANSL1L	miR-130a	Query: 3' tacgggaaaattGTAACGTGAc 5'
		:||||||||
		Ref: 5' ttaaaaaggcttTATTGCACTg 3'
circKANSL1L	miR-130a	Query: 3' tacgggaaaaTTGT-AACGTGAc 5'
		|| | |||||||
		Ref: 5' cagaaatccaAAGATTTGCACTg 3'
circWWP1	miR-130a	Query: 3' taCGGGA-A-AATTGTAACGTGAc 5'
		|||:| | || | ||||||||
		Ref: 5' ccGCCTTGTCTTCAAATTGCACTa 3'
circGPAT3	miR-133b	Query: 3' tatcgaccaACTTCCCCTGGTTt 5'
		| | | |||||||
		Ref: 5' ggaacctccTCACGAGGACCAAc 3'
circKANSL1L_3	miR-133b	Query: 3' tatcgaccaacttccCCTGGTTt 5'
		|||||||
		Ref: 5' acaaatacagtgtacGGACCAAg 3'
circKANSL1L_2	miR-133b	Query: 3' tatcgaccaacttccCCTGGTTt 5'
		|||||||
		Ref: 5' acaaatacagtgtacGGACCAAg 3'
circAMOTL1	miR-1343	Query: 3' cgctctcaCGCCCGGGGTCCTc 5'
		|| | |||||||
		Ref: 5' cccggtcaGCAAGACCCAGGAg 3'
circLIMCH1	miR-1343	Query: 3' cgcTCTCACG-CCCGGGGTCCTc 5'
		||| || ||:|||||||
		Ref: 5' acaAGAACGCACGGTCCCAGGAg 3'
circSTAG2	miR-1343	Query: 3' cgctctcacgccCGGGGTCCTc 5'
		| |||||||
		Ref: 5' aaaggcaaaaaaGGCCCAGGAg 3'
circKIF1B	miR-136	Query: 3' agGTAGTAGTTTTGTTTACCTCa 5'
		|| ||| :|| :|||||||
		Ref: 5' tcCAGGATCTGAA-GAATGGAGc 3'
circLIMCH1	miR-136	Query: 3' aggtagTAGTTTTGTTTACCTCa 5'
		:|||: |::|||||||
		Ref: 5' ggaaaaGTCAGCATGAATGGAGa 3'
circLIMCH1	miR-136	Query: 3' aggtagtagTTTTGTTTACCTCa 5'
		:||| ||||||||
		Ref: 5' ggaagaaagGAAAAAAATGGAGa 3'
circSTAG2	miR-136	Query: 3' agGTAGTAGTTTTGTTTACCTCa 5'
		||||| ||| | :|||||||
		Ref: 5' gtCATCACCAACA-GAATGGAGt 3'
circSTAG2	miR-136	Query: 3' aggtaGTAGTTTTGTTTACCTCa 5'
		|| :: : ||||||||
		Ref: 5' aagggCAAAGGTGGAAATGGAGg 3'
circWWP1	miR-136	Query: 3' aggtAGTA-GTTTTGTTTACCTCa 5'
		|||| || |:: |||||||
		Ref: 5' ctgtTCATACATAGTTAATGGAGa 3'
circWWP1	miR-136	Query: 3' agGTAGTAGTTTTGTTTACCTCa 5'
		|| :: :| :: |||||||
		Ref: 5' gcCAGTGATACTGTTAATGGAGa 3'
circKANSL1L	miR-142-3p	Query: 3' ggtatTTCATC-CTTTGTGATGt 5'
		|||||| |||||||
		Ref: 5' tcaccAAGTAGCCCTACACTACt 3'
circKANSL1L-3	miR-142-3p	Query: 3' ggtatttcatccTTTGTGATGt 5'
		|||||||||
		Ref: 5' agcagcttcattAAACACTACa 3'
circKANSL1L_2	miR-142-3p	Query: 3' ggtatTTCATC-CTTTGTGATGt 5'
		|||||| |||||||
		Ref: 5' tcaccAAGTAGCCCTACACTACt 3'
circKANSL1L_2	miR-142-3p	Query: 3' ggtatttcatccTTTGTGATGt 5'
		|||||||||
		Ref: 5' agcagcttcattAAACACTACa 3'
circDCUN1D1	miR-142-5p	Query: 3' tcatcacgaaagaTGAAATAc 5'
		|||||||
		Ref: 5' tccaaaatcctgaACTTTATa 3'
circEMC2	miR-142-5p	Query: 3' tcatcacGAAAG--ATGAAATAc 5'
		||| | |||||||
		Ref: 5' gcatgaaCTTGCAGAACTTTATa 3'
circTESK2	miR-1468	Query: 3' agtCGTTTTGTCCGTTTGCCTc 5'
		| | :|| |||||||||
		Ref: 5' catGGATCGCA-GCAAACGGAa 3'
circTRIP11	miR-1468	Query: 3' agtcGTTTTGTCCGTTTGCCTc 5'
		|||::| | |||||||
		Ref: 5' tatcCAAGGCCG--AAACGGAa 3'
circLIMCH1	miR-146a-5p	Query: 3' ttGGGTACCTTAAG-TCAAGAGt 5'
		| :| ||| | |||||||
		Ref: 5' aaCATAAAGAAGCCAAGTTCTCt 3'
circATG4C	miR-150	Query: 3' gtgaccaTGTTCCCAACCCTCt 5'
		|||| |||||||
		Ref: 5' gaaggaaACAA---TTGGGAGa 3'
circMYBPC2	miR-150	Query: 3' gtgaccatGTTCCCAACCCTCt 5'
		::|| |||||||
		Ref: 5' atcccgccTGAGATTTGGGAGc 3'
circMYO18B	miR-150	Query: 3' gtgaccaTGTTC-CCAACCCTCt 5'
		| ||| | |||||||
		Ref: 5' caagtccAGAAGAGTTTGGGAGa 3'
circFAM188A	miR-151-3p	Query: 3' agGAGTTCCTC--GA--AGTCAGATc 5'
		:|| :|||| || |||||||
		Ref: 5' atTTCTGGGAGTCCTGCACAGTCTAg 3'
circPHKB	miR-151-3p	Query: 3' aggaGTTCCTCGAA--GTCAGATc 5'
		:|||| | | |||||||
		Ref: 5' aagcTAAGGTCCATGACAGTCTAt 3'
circSNRK	miR-151-3p	Query: 3' aggagttcctcgaaGTCAGATc 5'
		|||||||
		Ref: 5' agattcattttaaaCAGTCTAa 3'
circLIFR	miR-16	Query: 3' gcggttataaatGCACGACGAt 5'
		|||||||||
		Ref: 5' tctggagcaggcCGTGCTGCTg 3'
circPHKB	miR-16	Query: 3' gcGGTTATAAATG-CACGACGAt 5'
		:||| :| || |||||||
		Ref: 5' tgTCAA-GTCAACATTGCTGCTg 3'
circTRIP11	miR-16	Query: 3' gcggttataaatgcACGACGAt 5'
		|||||||
		Ref: 5' tctttggaaaaaaaTGCTGCTg 3'
circWWP1	miR-181c	Query: 3' tgagtggctgtccaACTTACAa 5'
		|||||||
		Ref: 5' tcctcagaaaacaaTGAATGTa 3'
circTRIP11	miR-181c	Query: 3' tgaGTGGCTGTCCAACTTACAa 5'
		:||:| || |||||||
		Ref: 5' aggTACTG-CA-ACTGAATGTa 3'
circFAM188A	miR-182	Query: 3' tcACACTCAAGATG-GT------AACGGTTt 5'
		|| |||| ||:| || |||||||
		Ref: 5' tcTGGGAGTCCTGCACAGTCTAGTTGCCAAg 3'
circGPAT3	miR-182	Query: 3' tcaCACTCAAGATGGTAACGGTTt 5'
		| |: |||: ::|||||||
		Ref: 5' aggGAGGCATCTG-TGTTGCCAAt 3'
circZMYM4	miR-182	Query: 3' tcacactcaaGAT-GGT-AACGGTTt 5'
		||| ||| |||||||
		Ref: 5' gggattccagCTATCCATTTGCCAAt 3'
circAGL	miR-187	Query: 3' ggcCGA-CGTTGTGTTCTGTGCt 5'
		||| |:| | ::|||||||
		Ref: 5' tttGCTGGTACCCTGAGACACGg 3'
circCAMK2D	miR-187	Query: 3' ggccgACGTTG---TGTTCTGTGCt 5'
		||||:: | :|||||||
		Ref: 5' aacaaTGCAGTCCGAAGAGACACGt 3'
circMYBPC2_2	miR-187	Query: 3' ggccgacgTTGTG--TTCTGTGCt 5'
		||||: ||||||||
		Ref: 5' agatcgagAACATGAAAGACACGg 3'
circMYBPC2_3	miR-187	Query: 3' ggccgacgTTGTG--TTCTGTGCt 5'
		||||: ||||||||
		Ref: 5' agatcgagAACATGAAAGACACGg 3'
circLIFR	miR-195	Query: 3' cggttataaaGACACGACGAt 5'
		| ||||||||
		Ref: 5' ctggagcaggCCGTGCTGCTg 3'
circPHKB	miR-195	Query: 3' cggttataaagacACGACGAt 5'
		|||||||
		Ref: 5' gtcaagtcaacatTGCTGCTg 3'
circTRIP11	miR-195	Query: 3' cggttataaagacACGACGAt 5'
		|||||||
		Ref: 5' ctttggaaaaaaaTGCTGCTg 3'
circAGL	miR-199b-5p	Query: 3' ttgtctatcaGATT-TGTGACCc 5'
		||:: |||||||
		Ref: 5' cctttgtctgCTGGCACACTGGa 3'
circMYO18B	miR-199b-5p	Query: 3' ttGTCTATCAGATTTGTGACCc 5'
		::|| || |||||||
		Ref: 5' ctTGGAAAGGAATCACACTGGa 3'
circPARD3	miR-199b-5p	Query: 3' ttgtctatcagatTTGTGACCc 5'
		:|||||||
		Ref: 5' cgtgggacacgccGACACTGGt 3'
circTRIP11	miR-199b-5p	Query: 3' ttGTCTATCAGATTTGTGACCc 5'
		|| :|:| || |||||||
		Ref: 5' taCAAGTGGACT--ACACTGGc 3'
circEMC2	miR-19a	Query: 3' agtcaaaacgtatctAAACGTGt 5'
		|||||||
		Ref: 5' ctttcaagaaagtatTTTGCACa 3'
circKANSL1L_3	miR-19a	Query: 3' agTCAAAACGTATCTAAACGTGt 5'
		|| | || ||||||||||
		Ref: 5' gcAGAAATCCAAAGATTTGCACt 3'
circKANSL1L_3	miR-19a	Query: 3' agtcaaaacgTATCTAAACGTGt 5'
		||:| |||||||
		Ref: 5' gataccaaaaATGGCTTTGCACg 3'
circKANSL1L_2	miR-19a	Query: 3' agTCAAAACGTATCTAAACGTGt 5'
		|| | || ||||||||||
		Ref: 5' gcAGAAATCCAAAGATTTGCACt 3'
circKANSL1L_2	miR-19a	Query: 3' agtcaaaacgTATCTAAACGTGt 5'
		||:| |||||||
		Ref: 5' gataccaaaaATGGCTTTGCACg 3'
circKANSL1L	miR-19a	Query: 3' agTCAAAACGTATCTAAACGTGt 5'
		|| | || ||||||||||
		Ref: 5' gcAGAAATCCAAAGATTTGCACt 3'
circKANSL1L	miR-19a	Query: 3' agtcaaaacgTATCTAAACGTGt 5'
		||:| |||||||
		Ref: 5' gataccaaaaATGGCTTTGCACg 3'
circEMC2	miR-19b	Query: 3' agTCAAA--ACGTACCT-AAACGTGt 5'
		| ||| | | | | |||||||
		Ref: 5' gaACTTTCAAGAAAGTATTTTGCACa 3'
circKANSL1L_3	miR-19b	Query: 3' agtcaaaacgTACCTAAACGTGt 5'
		|||| |||||||
		Ref: 5' gataccaaaaATGGCTTTGCACg 3'
circKANSL1L_3	miR-19b	Query: 3' agTCAAAACGTACCTAAACGTGt 5'
		|| | || |||||||||
		Ref: 5' gcAGAAATCCAAAGATTTGCACt 3'
circKANSL1L_2	miR-19b	Query: 3' agtcaaaacgTACCTAAACGTGt 5'
		|||| |||||||
		Ref: 5' gataccaaaaATGGCTTTGCACg 3'
circKANSL1L_2	miR-19b	Query: 3' agTCAAAACGTACCTAAACGTGt 5'
		|| | || |||||||||
		Ref: 5' gcAGAAATCCAAAGATTTGCACt 3'
circKANSL1L	miR-19b	Query: 3' agtcaaaacgTACCTAAACGTGt 5'
		|||| |||||||
		Ref: 5' gataccaaaaATGGCTTTGCACg 3'
circKANSL1L	miR-19b	Query: 3' agTCAAAACGTACCTAAACGTGt 5'
		|| | || |||||||||
		Ref: 5' gcAGAAATCCAAAGATTTGCACt 3'
circGPAT3	miR-214	Query: 3' gacgGACAGACACGGACGACa 5'
		||| || |||||||
		Ref: 5' ggtgCTGGGCGT-CCTGCTGc 3'
circPTBP1	miR-214	Query: 3' gacggacAGACACGGACGACa 5'
		|| || |||||||
		Ref: 5' aggaaatTCCGT-CCTGCTGg 3'
circKANSL1L_3	miR-218	Query: 3' tgtACCAAT---CTAG--TTCGTGTt 5'
		|||||| ||| |||||||
		Ref: 5' agcTGGTTACTTAATCAGAAGCACAg 3'
circTRIP11	miR-218	Query: 3' tgtacCAATCTAGTTCGTGTt 5'
		| || | |||||||
		Ref: 5' aagaaGCTACA--AAGCACAt 3'
circKANSL1L_3	miR-218-5p	Query: 3' tgtACCAAT---CTAG--TTCGTGTt 5'
		|||||| ||| |||||||
		Ref: 5' agcTGGTTACTTAATCAGAAGCACAg 3'
circTRIP11	miR-218-5p	Query: 3' tgtacCAATCTAGTTCGTGTt 5'
		| || | |||||||
		Ref: 5' aagaaGCTACA--AAGCACAt 3'
circKANSL1L_3	miR-218b	Query: 3' gtgtACCAAT---CTAG--TTCGTGTt 5'
		|||||| ||| |||||||
		Ref: 5' tagcTGGTTACTTAATCAGAAGCACAg 3'
circTRIP11	miR-218b	Query: 3' gtgtacCAATCTAGTTCGTGTt 5'
		| || | |||||||
		Ref: 5' caagaaGCTACA--AAGCACAt 3'
circAMOTL1	miR-22-3p	Query: 3' tgTCAAGAAGTTGA--CCGTCGAa 5'
		:|||| :: | |||||||
		Ref: 5' gaGGTTCCGAGGATGCGGCAGCTg 3'
circEMC2	miR-22-3p	Query: 3' tgtcaagaaGTTGA-CCGTCGAa 5'
		:|::| |||||||
		Ref: 5' gaaatatgcTAGTTGGGCAGCTa 3'
circPFKFB1	miR-22-3p	Query: 3' tgtcaagaagttGACCGTCGAa 5'
		|||||||||
		Ref: 5' aagcagtgtgccCTGGCAGCTc 3'
circPFKFB1_2	miR-22-3p	Query: 3' tgtcaagaagttGACCGTCGAa 5'
		|||||||||
		Ref: 5' aagcagtgtgccCTGGCAGCTc 3'
circTRIP11	miR-22-3p	Query: 3' tgTCAAGAAGTTGACCGTCGAa 5'
		|| | || | |||||||
		Ref: 5' tcAGCACAGCATCGGGCAGCTt 3'
circAGL	miR-22-5p	Query: 3' atttcgaACGGTGACTTCTTGa 5'
		|| | |||||||
		Ref: 5' accgatgTGAATCAGAAGAACa 3'
circAGL_2	miR-22-5p	Query: 3' atttcgaACGGTGACTTCTTGa 5'
		|| | |||||||
		Ref: 5' accgatgTGAATCAGAAGAACa 3'
circLIMCH1	miR-22-5p	Query: 3' attTCGAACGGTGACTTCTTGa 5'
		||: | :|||||||||
		Ref: 5' tccAGTCCTCAGCTGAAGAACg 3'
circZMYM4	miR-22-5p	Query: 3' atttcgaacGGTGACTTCTTGa 5'
		::| |||||||
		Ref: 5' atattagaaTTAAAGAAGAACc 3'
circTRIP11	miR-22-5p	Query: 3' atTTCGAACGGTGACTTCTTGa 5'
		:||| |||:||||||||
		Ref: 5' atGAGCGAACCATTGAAGAACt 3'
circTRIP11	miR-22-5p	Query: 3' atTTCGAACGGTGACTTCTTGa 5'
		|| | | | |||||||
		Ref: 5' tgAATCAAGAAAAGGAAGAACt 3'
circWWP1	miR-24-3p	Query: 3' gacaaggacgacTTGACTCGGt 5'
		| |||||||
		Ref: 5' aaaaccactcacATCTGAGCCt 3'
circTRIP11	miR-24-3p	Query: 3' gacaaGGACGACTTGACTCGGt 5'
		|||| || :|||||||
		Ref: 5' ctgcaCCTG-TG-GCTGAGCCt 3'
circSDAD1	miR-27b-5p	Query: 3' acAAGTGGTTA--GT-CGATTCGAGa 5'
		||| |: | || | |||||||
		Ref: 5' acTTCTACGTTGCCACGATAAGCTCc 3'
circSNRK	miR-27b-5p	Query: 3' acaagtGGTTAGTCG-ATTCGAGa 5'
		|: ||:: | |||||||
		Ref: 5' ccatatCTTATTGCCATAAGCTCc 3'
circFAM188A	miR-28-5p	Query: 3' gagttatctgacacTCGAGGAa 5'
		|||||||
		Ref: 5' atttcttttgaagaAGCTCCTg 3'
circMYBPC2	miR-28-5p	Query: 3' gagttaTCT-GACACTCGAGGAa 5'
		||| :|| ||||||||
		Ref: 5' cgcctgAGATTTGGGAGCTCCTg 3'
circSDAD1	miR-28-5p	Query: 3' gagttatcTGACACTCGAGGAa 5'
		|| | |||||||
		Ref: 5' acgttgccACGATAAGCTCCTg 3'
circUBE3A	miR-28-5p	Query: 3' gagttatctgacacTCGAGGAa 5'
		|||||||
		Ref: 5' ttttagaattcaccAGCTCCTc 3'
circLIMCH1	miR-296-3p	Query: 3' cctttcggaggcGGGTTGGGa 5'
		||||||||
		Ref: 5' ttcctggatgacCCCAACCCc 3'
circCAMK2D	miR-299	Query: 3' catacaccctgccATTTGGTa 5'
		|||||||
		Ref: 5' tgtccaaaagcaaTAAACCAa 3'
circKANSL1L_3	miR-299	Query: 3' catacaccCTGCCATTTGGTa 5'
		|| |||||||
		Ref: 5' aatgcactGAAATTAAACCAg 3'
circKANSL1L_2	miR-299	Query: 3' catacaccCTGCCATTTGGTa 5'
		|| |||||||
		Ref: 5' aatgcactGAAATTAAACCAg 3'
circKANSL1L	miR-299	Query: 3' catacaccCTGCCATTTGGTa 5'
		|| |||||||
		Ref: 5' aatgcactGAAATTAAACCAg 3'
circTRIP11	miR-299	Query: 3' catacaccctgccATTTGGTa 5'
		|||||||
		Ref: 5' agactgagtaattTAAACCAg 3'
circLIMCH1	miR-29c	Query: 3' attggctaaagTTTACCACGAt 5'
		|: |||||||
		Ref: 5' cggaaaggtggAGTTGGTGCTg 3'
circKANSL1L_3	miR-30a-3p	Query: 3' cgACGTTTGTAGGCTGACTTTc 5'
		| | | || | |||||||
		Ref: 5' ttTACCTAAATGC-ACTGAAAt 3'
circKANSL1L_2	miR-30a-3p	Query: 3' cgACGTTTGTAGGCTGACTTTc 5'
		| | | || | |||||||
		Ref: 5' ttTACCTAAATGC-ACTGAAAt 3'
circKANSL1L	miR-30a-3p	Query: 3' cgACGTTTGTAGGCTGACTTTc 5'
		| | | || | |||||||
		Ref: 5' ttTACCTAAATGC-ACTGAAAt 3'
circWWP1	miR-30a-3p	Query: 3' cgacgttTGTAGGCTGACTTTc 5'
		:|| || |||||||
		Ref: 5' ctcatctGCA-CCCACTGAAAa 3'
circTRIP11	miR-30a-3p	Query: 3' cgACGTTTGTAGGCTGACTTTc 5'
		||| | || : |||||||
		Ref: 5' aaTGCCATCAGTAAACTGAAAg 3'
circTRIP11	miR-30a-3p	Query: 3' cgacgtTTGTAG-GCTGACTTTc 5'
		:|| || |||||||
		Ref: 5' gcttttGACCTCAAAACTGAAAa 3'
circKANSL1L_3	miR-30e-3p	Query: 3' cgacattTGTAGGCTGACTTTc 5'
		| || | |||||||
		Ref: 5' tttacctAAATGC-ACTGAAAt 3'
circKANSL1L_2	miR-30e-3p	Query: 3' cgacattTGTAGGCTGACTTTc 5'
		| || | |||||||
		Ref: 5' tttacctAAATGC-ACTGAAAt 3'
circKANSL1L	miR-30e-3p	Query: 3' cgacattTGTAGGCTGACTTTc 5'
		| || | |||||||
		Ref: 5' tttacctAAATGC-ACTGAAAt 3'
circWWP1	miR-30e-3p	Query: 3' cgacattTGTAGGCTGACTTTc 5'
		:|| || |||||||
		Ref: 5' ctcatctGCA-CCCACTGAAAa 3'
circTRIP11	miR-30e-3p	Query: 3' cgACATTTGTAGGCTGACTTTc 5'
		|| | || : |||||||
		Ref: 5' aaTGCCATCAGTAAACTGAAAg 3'
circTRIP11	miR-30e-3p	Query: 3' cgACATTTGTAG-GCTGACTTTc 5'
		| | :|| || |||||||
		Ref: 5' gcTTTTGACCTCAAAACTGAAAa 3'
circAGO4	miR-323	Query: 3' tctccAGCTGGCACATTACACg 5'
		|||| : |||||||||
		Ref: 5' aaataTCGAGTTTGTAATGTGa 3'
circPHKB	miR-335	Query: 3' gtaaaaagCAATAACGAGAACt 5'
		| | | |||||||
		Ref: 5' gcgcctggGCTTTGGCTCTTGc 3'
circTRIP11	miR-335	Query: 3' gtaaaaagcaataaCGAGAACt 5'
		|||||||
		Ref: 5' cactgaaggagaagGCTCTTGc 3'
circAMOTL1	miR-361-3p	Query: 3' cgtttaGTCTTAGTGT-GGACCCCc 5'
		|: |: |:|| |||||||
		Ref: 5' cgccgcCGCAGCCGCAGCCTGGGGc 3'
circGPAT3	miR-369	Query: 3' tttctagttggtaCATAATAa 5'
		|||||||
		Ref: 5' -------------GTATTATc 3'
circLIMCH1	miR-370	Query: 3' tggtCCAAGGTGG-G-GTCGTCCg 5'
		||| | :|| | |||||||
		Ref: 5' ccgcGGTGCAGCCGCACAGCAGGg 3'
circLIMCH1	miR-370	Query: 3' tgGTCCAAGGTGG---GGTCGTCCg 5'
		|:| | ||| | :|||||||
		Ref: 5' tcCGGATGCCAGCATGTCAGCAGGc 3'
circPTBP1	miR-370	Query: 3' tgGTCCAAGGTGGGGTCGTCCg 5'
		||| | :| |||||||
		Ref: 5' ggCAGCGGCGGCAGCAGCAGGc 3'
circZMYM4	miR-370	Query: 3' tggtccaagGTGGGGTCGTCCg 5'
		|||| |||||||
		Ref: 5' aagcaatggCACCACAGCAGGg 3'
circTRIP11	miR-370	Query: 3' tggtccaaggtgggGTCGTCCg 5'
		|||||||
		Ref: 5' tggaagagtggaaaCAGCAGGt 3'
circKANSL1L_3	miR-376a-3p	Query: 3' tgcACCTAAAAGGAGATACTa 5'
		|| | ||| |||||||
		Ref: 5' aaaTGAAATTT--TCTATGAa 3'
circKANSL1L_2	miR-376a-3p	Query: 3' tgcACCTAAAAGGAGATACTa 5'
		|| | ||| |||||||
		Ref: 5' aaaTGAAATTT--TCTATGAa 3'
circKANSL1L	miR-376a-3p	Query: 3' tgcACCTAAAAGGAGATACTa 5'
		|| | ||| |||||||
		Ref: 5' aaaTGAAATTT--TCTATGAa 3'
circTRIP11	miR-376a-3p	Query: 3' tgcACCTAAAAGGAGATACTa 5'
		|| | |::|||||||
		Ref: 5' caaTGCAAAGTTTTCTATGAt 3'
circDCUN1D1	miR-382	Query: 3' gcttaggtggtgCTTGTTGAa 5'
		||||||||
		Ref: 5' aggaagaagttaGAACAACTa 3'
circENPEP	miR-382	Query: 3' gctTAGGTGGTGCTTGTTGAa 5'
		|| ||: | |||||||
		Ref: 5' tatATGGACT-CAAACAACTt 3'
circFAM188A	miR-382	Query: 3' gcttaggtggtgcTTGTTGAa 5'
		|||||||
		Ref: 5' ggttaagaggaaaAACAACTg 3'
circKANSL1L	miR-382	Query: 3' gcTTAGGTGGT-GCTTGTTGAa 5'
		|:| :| | | |||||||
		Ref: 5' agAGTATAAAATCCAACAACTa 3'
circKANSL1L_2	miR-382	Query: 3' gcTTAGGTGGT-GCTTGTTGAa 5'
		|:| :| | | |||||||
		Ref: 5' agAGTATAAAATCCAACAACTa 3'
circKANSL1L	miR-382	Query: 3' gcTTAGGTGGT-GCTTGTTGAa 5'
		|:| :| | | |||||||
		Ref: 5' agAGTATAAAATCCAACAACTa 3'
circKIF1B	miR-382	Query: 3' gcttaggtgGTGCTTGTTGAa 5'
		|| |||||||
		Ref: 5' ccttggctgCAGAAACAACTg 3'
circLIFR	miR-382	Query: 3' gcTTAGGTGGTGCTTGTTGAa 5'
		|:| ::: || |||||||
		Ref: 5' gaAGTGTGTAACAAACAACTt 3'
circLIMCH1	miR-382	Query: 3' gcttaggtGGTGCTTGTTGAa 5'
		::|| |||||||
		Ref: 5' acagcattTTAC-AACAACTg 3'
circTRIP11	miR-382	Query: 3' gcTTAGGTGGTGC--TTGTTGAa 5'
		::|: || :|| |||||||
		Ref: 5' ctGGTTGACAGCGATAACAACTc 3'
circAMOTL1	miR-411	Query: 3' caaTC-ACC-TGGCACAATGTa 5'
		|| ||| || ||||||||
		Ref: 5' ggcAGCTGGAACAGTGTTACAg 3'
circTRIP11	miR-411	Query: 3' caatcACCTGGCACAATGTa 5'
		| ||: ||||||||
		Ref: 5' acctcTCGATAGTGTTACAg 3'
circAGL	miR-421-3p	Query: 3' cgcgggTTAATTACAGACAACTa 5'
		|: ||: | |||||||
		Ref: 5' tctggaAGCTAG-GACTGTTGAg 3'
circAGL	miR-421-3p	Query: 3' cgcgggTTAATTACAGACAACTa 5'
		:| | || |||||||
		Ref: 5' atctggGAGTCTTG-CTGTTGAc 3'
circAGL_2	miR-421-3p	Query: 3' cgcgggTTAATTACAGACAACTa 5'
		|: ||: | |||||||
		Ref: 5' tctggaAGCTAG-GACTGTTGAg 3'
circAGL_2	miR-421-3p	Query: 3' cgcgggTTAATTACAGACAACTa 5'
		:| | || |||||||
		Ref: 5' atctggGAGTCTTG-CTGTTGAc 3'
circGPAT3	miR-424-3p	Query: 3' tatcgtcgcggagTGCAAAAc 5'
		|||||||
		Ref: 5' acctccccaatagACGTTTTg 3'
circLIFR	miR-424-5p	Query: 3' aaGTTTTGTACTTAACGACGAc 5'
		:::|:|| | |||||||
		Ref: 5' tcTGGAGCAGGCCGTGCTGCTg 3'
circPHKB	miR-424-5p	Query: 3' aaGTTTTGTACTTAACGACGAc 5'
		|||: || |||||||||
		Ref: 5' gtCAAGTCA-ACATTGCTGCTg 3'
circTRIP11	miR-424-5p	Query: 3' aaGTTTTGTACTTAACGACGAc 5'
		:::|| | || |||||||
		Ref: 5' ttTGGAAAA--AAATGCTGCTg 3'
circGPAT3	miR-432-5p	Query: 3' tgggttACTGGATGAGGTTCt 5'
		| |::| |||||||
		Ref: 5' cgtgttTTATTT-CTCCAAGa 3'
circKANSL1L_3	miR-432-5p	Query: 3' tggGTTACTGGAT-GAGGTTCt 5'
		||: | |: |||||||
		Ref: 5' aggCAGATTCGTGCCTCCAAGg 3'
circKANSL1L_2	miR-432-5p	Query: 3' tggGTTACTGGAT-GAGGTTCt 5'
		||: | |: |||||||
		Ref: 5' aggCAGATTCGTGCCTCCAAGg 3'
circKANSL1L	miR-432-5p	Query: 3' tggGTTACTGGAT-GAGGTTCt 5'
		||: | |: |||||||
		Ref: 5' aggCAGATTCGTGCCTCCAAG- 3'
circTRIP11	miR-432-5p	Query: 3' tggGTTA--CTGGATGAGGTTCt 5'
		|:|| || || |||||||
		Ref: 5' aaaCGATTAGAACT-CTCCAAGa 3'
circDCUN1D1	miR-450b-5p	Query: 3' ataagtccttgTATAACGTTTt 5'
		|| |||||||
		Ref: 5' gtttacttttaATTTTGCAAAg 3'
circSDAD1	miR-450b-5p	Query: 3' ataagtccTTGTATAACGTTTt 5'
		:|||| |||||||
		Ref: 5' ctccgaatGACATTTTGCAAAg 3'
circTRIP11	miR-450b-5p	Query: 3' ataAGTCCTTGTATAACGTTTt 5'
		|:| |||: |||||||
		Ref: 5' aaaTTAAGAAT---TTGCAAAa 3'
circAGL	miR-451	Query: 3' ttGAGTC--ATTACCA--TTGCCAAa 5'
		:|||| | || || |||||||
		Ref: 5' caTTCAGGATTATTGTAAAACGGTTc 3'
circZMYM4	miR-451	Query: 3' ttgAGTCATT--AC-CATTGCCAAa 5'
		||| || || |||||||
		Ref: 5' ttaTCATGAACGTGAAAAACGGTTg 3'
circLIMCH1	miR-455-5p	Query: 3' gcTACATCAGGTTTCCGTGTAt 5'
		:||| |||:::|||||||
		Ref: 5' gaGTGTCCTCCGGGGGCACATa 3'
circENPEP	miR-487b	Query: 3' gctTGTCCTGTCCCTATTGGTg 5'
		|:: :|| |||||||
		Ref: 5' agtATGCTGCAAACATAACCAa 3'
circKANSL1L_3	miR-487b	Query: 3' gcttgtCCT--GTCCCTATTGGTg 5'
		||| || |||||||
		Ref: 5' tattttGGATTCAAATATAACCAa 3'
circKANSL1L_2	miR-487b	Query: 3' gcttgtCCT--GTCCCTATTGGTg 5'
		||| || |||||||
		Ref: 5' tattttGGATTCAAATATAACCAa 3'
circKANSL1L	miR-487b	Query: 3' gcttgtCCT--GTCCCTATTGGTg 5'
		||| || |||||||
		Ref: 5' tattttGGATTCAAATATAACCAa 3'
circLIMCH1	miR-487b	Query: 3' gctTGTCCTGTCCCTATTGGTg 5'
		:||| | |||||||
		Ref: 5' gctGCAGCTGATAAATAACCAg 3'
circLIMCH1	miR-493-3p	Query: 3' ggaccgtgtGTCATCTGGAAGt 5'
		| | ||||||||
		Ref: 5' caagaggttCTGAAGACCTTCa 3'
circMYBPC2	miR-493-3p	Query: 3' ggaccgtgtgtcaTCTGGAAGt 5'
		||||||||
		Ref: 5' agatcagcgacccAGACCTTCc 3'
circAGO4	miR-493-5p	Query: 3' ttacTTTCGGATGGTACATGTt 5'
		|||| | :|||||||
		Ref: 5' ggcaAAAG--AAATATGTACAc 3'
circATG4C	miR-493-5p	Query: 3' ttACTTTCGGATGGTACATGTt 5'
		|| ||| : | |||||||
		Ref: 5' ccTGCAAGATCAGGATGTACAa 3'
circKANSL1L_3	miR-493-5p	Query: 3' ttACTTTCGGATGG--TACATGTt 5'
		| |: || |: | |||||||
		Ref: 5' agTCAGTGCATGACAGATGTACAa 3'
circKANSL1L_2	miR-493-5p	Query: 3' ttACTTTCGGATGG--TACATGTt 5'
		| |: || |: | |||||||
		Ref: 5' agTCAGTGCATGACAGATGTACAa 3'
circKANSL1L	miR-493-5p	Query: 3' ttACTTTCGGATGG--TACATGTt 5'
		| |: || |: | |||||||
		Ref: 5' agTCAGTGCATGACAGATGTACAa 3'
circAMOTL1	miR-504	Query: 3' tctatctcaCGTCTG-GTCCCAGa 5'
		| || | |||||||
		Ref: 5' ggcacgccaGGAGCCGCAGGGTCa 3'
circLIMCH1	miR-542-3p	Query: 3' aaagtcaatagTTAGACAGTGt 5'
		|| |||||||
		Ref: 5' gtctccgagcaAAACTGTCACt 3'
circLIMCH1	miR-542-3p	Query: 3' aaagTCAATAGTTAGACAGTGt 5'
		||||: :: |||||||
		Ref: 5' gtggAGTTGGTG--CTGTCACa 3'
circTRIP11	miR-542-3p	Query: 3' aaaGTCAATAGTTAGACAGTGt 5'
		|| ||: :| |||||||
		Ref: 5' aacCA-TTGAAGAACTGTCACa 3'
circAMOTL1	miR-7134-5p	Query: 3' cctatccctTGGGCGCCTGTa 5'
		| | |||||||
		Ref: 5' aaccgcgccAACAGCGGACAg 3'
circATG4C	miR-7142-3p	Query: 3' agtgaagtctcctcGGTTGTTt 5'
		|||||||
		Ref: 5' gagaactcaaaaccCCAACAAt 3'
circENPEP	miR-7142-3p	Query: 3' agtgAAGTCTCCTC-GGTTGTTt 5'
		||: || ||| |||||||
		Ref: 5' cttgTTTTGATGAGCCCAACAAa 3'
circKANSL1L_3	miR-7142-3p	Query: 3' agtgaaGTCTCCTCGGTTGTTt 5'
		:| | | |||||||
		Ref: 5' ctagagTATAAAATCCAACAAc 3'
circKANSL1L_2	miR-7142-3p	Query: 3' agtgaaGTCTCCTCGGTTGTTt 5'
		:| | | |||||||
		Ref: 5' ctagagTATAAAATCCAACAAc 3'
circKANSL1L	miR-7142-3p	Query: 3' agtgaaGTCTCCTCGGTTGTTt 5'
		:| | | |||||||
		Ref: 5' ctagagTATAAAATCCAACAAc 3'
circSNRK	miR-7142-3p	Query: 3' agtgaagTC-TCCTCGGTTGTTt 5'
		|| || | |||||||
		Ref: 5' --gggaaAGAAGCAACCAACAAa 3'
circLIMCH1	miR-758	Query: 3' caaTCACCTGGTCCAGTGTTt 5'
		||| |:: |||||||
		Ref: 5' tggAGTTGGTGCTGTCACAAa 3'
circAGL	miR-885-5p	Query: 3' tctccgtcccatcaCATTACCt 5'
		|||||||
		Ref: 5' aaggattaatgtccGTAATGGc 3'
circKANSL1L_3	miR-885-5p	Query: 3' tctccgtcccatCACATTACCt 5'
		|||||||||
		Ref: 5' gaaaaacttactGTGTAATGGc 3'
circKANSL1L_2	miR-885-5p	Query: 3' tctccgtcccatCACATTACCt 5'
		|||||||||
		Ref: 5' gaaaaacttactGTGTAATGGc 3'
circKANSL1L	miR-885-5p	Query: 3' tctccgtcccatCACATTACCt 5'
		|||||||||
		Ref: 5' gaaaaacttactGTGTAATGGc 3'
circAGO4	miR-9	Query: 3' gtatgtcGATCTATTGGTTTCt 5'
		| | | |||||||
		Ref: 5' agcgtgtCAAATTTACCAAAGa 3'
circKANSL1L_3	miR-9	Query: 3' gtatgtcgaTCTATTGGTTTCt 5'
		| ||||||||||
		Ref: 5' tggattcaaATATAACCAAAGa 3'
circKANSL1L_2	miR-9	Query: 3' gtatgtcgaTCTATTGGTTTCt 5'
		| ||||||||||
		Ref: 5' tggattcaaATATAACCAAAGa 3'
circKANSL1L	miR-9	Query: 3' gtatgtcgaTCTATTGGTTTCt 5'
		| ||||||||||
		Ref: 5' tggattcaaATATAACCAAAGa 3'
circTRIP11	miR-9	Query: 3' gtaTGTCG--ATCTATTGGTTTCt 5'
		:|||| |: | |||||||
		Ref: 5' cggGCAGCTTTGCAATACCAAAGa 3'
circAGO4	miR-9-1	Query: 3' agtatgtcGATCTATTGGTTTCt 5'
		| | | |||||||
		Ref: 5' cagcgtgtCAAATTTACCAAAGa 3'
circKANSL1L_3	miR-9-1	Query: 3' agTATGTCGATCTATTGGTTTCt 5'
		|| || | ||||||||||
		Ref: 5' ggATTCA--AATATAACCAAAGa 3'
circKANSL1L_2	miR-9-1	Query: 3' agTATGTCGATCTATTGGTTTCt 5'
		|| || | ||||||||||
		Ref: 5' ggATTCA--AATATAACCAAAGa 3'
circKANSL1L	miR-9-1	Query: 3' agTATGTCGATCTATTGGTTTCt 5'
		|| || | ||||||||||
		Ref: 5' ggATTCA--AATATAACCAAAGa 3'
circTRIP11	miR-9-1	Query: 3' agtaTGTCG--ATCTATTGGTTTCt 5'
		:|||| |: | |||||||
		Ref: 5' tcggGCAGCTTTGCAATACCAAAGa 3'
circAGO4	miR-9-2	Query: 3' agtatgtcGATCTATTGGTTTCt 5'
		| | | |||||||
		Ref: 5' cagcgtgtCAAATTTACCAAAGa 3'
circKANSL1L_3	miR-9-2	Query: 3' agTATGTCGATCTATTGGTTTCt 5'
		|| || | ||||||||||
		Ref: 5' ggATTCA--AATATAACCAAAGa 3'
circKANSL1L_2	miR-9-2	Query: 3' agTATGTCGATCTATTGGTTTCt 5'
		|| || | ||||||||||
		Ref: 5' ggATTCA--AATATAACCAAAGa 3'
circKANSL1L	miR-9-2	Query: 3' agTATGTCGATCTATTGGTTTCt 5'
		|| || | ||||||||||
		Ref: 5' ggATTCA--AATATAACCAAAGa 3'
circTRIP11	miR-9-2	Query: 3' agtaTGTCG--ATCTATTGGTTTCt 5'
		:|||| |: | |||||||
		Ref: 5' tcggGCAGCTTTGCAATACCAAAGa 3'

## Sheet: C
Predicted target analysis of DE miRNAs with DE coding genes that related to myogenesis between LT1D and LT90D samples
Query	Ref	Binding
let-7i	MEF2D	Query: 3' tcGTGTTTGA-TGATGGAGt 5'
		||: : || :|||||||
		Ref: 5' ctCATTGTCTCGCTACCTCc 3'
miR-1	IGF1	Query: 3' atGTATGAAGAAATGTAAGGt 5'
		:| || | |||||||
		Ref: 5' aaTACACAAGTAAACATTCCa 3'
miR-1	MEOX2	Query: 3' atgtaTGAA-GAAA--TGTAAGGt 5'
		|||| |||| |||||||
		Ref: 5' ggtgaACTTGCTTTGAACATTCCa 3'
miR-1	MEOX2	Query: 3' atgtaTGAA-GAAA--TGTAAGGt 5'
		|:|| |||| |||||||
		Ref: 5' gatgaATTTGCTTTGAACATTCCa 3'
miR-1	MSTN	Query: 3' atgtatgaagaaATGTAAGGt 5'
		||||||||
		Ref: 5' ctgtaaaccaggTACATTCCc 3'
miR-10a-5p	ENG	Query: 3' tgtttaagcctagaTGTCCCAt 5'
		|||||||
		Ref: 5' gaggcaggaaacaaACAGGGTg 3'
miR-10a-5p	LAMP2	Query: 3' tgtTTAAGCCTAGATGTCCCAt 5'
		|:||: || |||||||
		Ref: 5' agtAGTTTTGA---ACAGGGTc 3'
miR-10a-5p	MYOD1	Query: 3' tgttTAAGCCTAGATGTCCCAt 5'
		|||| | ||||||||
		Ref: 5' ttttATTCCG---TACAGGGTc 3'
miR-10b	ENG	Query: 3' tgtttaagccaagaTGTCCCAt 5'
		|||||||
		Ref: 5' gaggcaggaaacaaACAGGGTg 3'
miR-10b	LAMP2	Query: 3' tgtttaagcCAAGA--TGTCCCAt 5'
		|||:| |||||||
		Ref: 5' atgccagtaGTTTTGAACAGGGTc 3'
miR-10b	MYOD1	Query: 3' tgtttAAGCCAAG--ATGTCCCAt 5'
		||: ||| ||||||||
		Ref: 5' ctcctTTTTATTCCGTACAGGGTc 3'
miR-122	MEF2D	Query: 3' tgTTTG---TGGTA-ACAGTGTGAGGt 5'
		|||| || || ||||||||
		Ref: 5' ccAAACCCGACAATCACCCACACTCCt 3'
miR-122	MYOD1	Query: 3' tgtttgtgGTAACAGTGTGAGGt 5'
		| | |:|||||||
		Ref: 5' gccttgggCTTCTTTACACTCCt 3'
miR-125b	ENG	Query: 3' agtgttcaatcCCAGAGTCCCt 5'
		||||||||||
		Ref: 5' gactgtgggcaGGTCTCAGGGc 3'
miR-125b	ENG	Query: 3' agtgttcaatCCCAGAGTCCCt 5'
		| | |||||||
		Ref: 5' gaggccccctGAGGCTCAGGGg 3'
miR-125b	ITGA8	Query: 3' agtgttcaatcccaGAGTCCCt 5'
		|||||||
		Ref: 5' taatgacactgcagCTCAGGGa 3'
miR-125b	MYOD1	Query: 3' agtgttcaatcCCAGAGTCCCt 5'
		| ||||||||
		Ref: 5' atgggctgtctGCTCTCAGGGc 3'
miR-125b	MYOD1	Query: 3' agtgttcaaTCCCAGAGTCCCt 5'
		|| |||||||
		Ref: 5' gttttctccAGCAACTCAGGGa 3'
miR-127	ENG	Query: 3' tcGGTTCGAGTC------TGCCTAGGCt 5'
		|| |||||| | |||||||
		Ref: 5' agCCTCGCTCAGTGTGTTAAGGATCCGg 3'
miR-127	ENG	Query: 3' tcggttCGAGTC------TGCCTAGGCt 5'
		|||||| | |||||||
		Ref: 5' ggtcttGCTCAGTGGGTTAAGGATCCGg 3'
miR-128	CFL2	Query: 3' tttctCTGGCCAAGTGACACt 5'
		||:| | ||||||||
		Ref: 5' aatttGATCTGCTCACTGTGa 3'
miR-128	ENG	Query: 3' tttcTCTGGCCA-AGTGACACt 5'
		:| || || ||||||||
		Ref: 5' acttGGTCCAGTGTCACTGTGa 3'
miR-128	PFKM	Query: 3' tttctcTGGCCAAGTGACACt 5'
		||:|| ||||||||
		Ref: 5' atgccaACTGG-TCACTGTG- 3'
miR-128	PLAGL1	Query: 3' tttctctggccaAGTGACACt 5'
		||||||||
		Ref: 5' aaaaaaaaaaaaTCACTGTGt 3'
miR-128	TIPARP	Query: 3' ttTCTCTGGCCAA--GTGACACt 5'
		:|||| ||| |||||||
		Ref: 5' taGGAGA---GTTCCCACTGTGg 3'
miR-1285	DLG1	Query: 3' tgccccagagcgatacAACGGGTc 5'
		|||||||
		Ref: 5' acttagatgaaggtccTTGCCCAg 3'
miR-1285	ID2	Query: 3' tgccccagAGCGATAC--AACGGGTc 5'
		|| | | | |||||||
		Ref: 5' cgttaaaaTCACAAGGAATTGCCCAa 3'
miR-1285	ID2	Query: 3' tgccccagagcgatacAACGGGTc 5'
		|||||||
		Ref: 5' actaagaacggtcgacTTGCCCAg 3'
miR-1285	MEF2D	Query: 3' tgccccagagcgatacAACGGGTc 5'
		|||||||
		Ref: 5' catgcatcccagagccTTGCCCAg 3'
miR-130a	ATF3	Query: 3' taCGGGAAAATTGTAACGTGAc 5'
		|:||| | :|||||||
		Ref: 5' agGTCCTCT----GTTGCACTa 3'
miR-130a	CFL2	Query: 3' tacgggaAAATTGTAACGTGAc 5'
		|||| :|||||||
		Ref: 5' agtattaTTTATAGTTGCACTt 3'
miR-130a	CFL2	Query: 3' tacgggAAAATTGTAACGTGAc 5'
		|| | : |||||||
		Ref: 5' caggaaTTATTTTTTTGCACTt 3'
miR-130a	CFL2	Query: 3' tacggGAAAATT--GTAACGTGAc 5'
		||| || : |||||||
		Ref: 5' aatggCTTGGAATCTTTTGCACTg 3'
miR-130a	DLG1	Query: 3' tacgGGAAAATTGTAACGTGAc 5'
		:| | |: :|||||||
		Ref: 5' accaTCATCTGCAGTTGCACTt 3'
miR-130a	MEOX2	Query: 3' tacggGAAAATTGTAACGTGAc 5'
		||||| :| |||||||
		Ref: 5' gtttgCTTTT-GC-TTGCACTg 3'
miR-130a	MEOX2	Query: 3' taCGGGAAAATTGTAACGTGAc 5'
		||:||| :| |||||||
		Ref: 5' ttGCTCTT---GC-TTGCACTg 3'
miR-133a-3p	ENG	Query: 3' gtcgacCAACTTCCCCTGGTt 5'
		| || |||||||
		Ref: 5' ggtacaGCTGCCCGGGACCAc 3'
miR-133a-3p	ENG	Query: 3' gtcgaccaacttcCCCTGGTt 5'
		|||||||
		Ref: 5' tctgcccaccccaGGGACCAt 3'
miR-133a-3p	MAFF	Query: 3' gtcgaccaacTTCCCCTGGTt 5'
		||||||||||
		Ref: 5' gccggagagaAAGGGGACCAa 3'
miR-133b	MAFF	Query: 3' taTCGACC-AAC-TTCCCCTGGTTt 5'
		||| || | |||||||||||
		Ref: 5' ccAGCCGGAGAGAAAGGGGACCAAg 3'
miR-133b	MSTN	Query: 3' tatcgaccaacttccCCTGGTTt 5'
		|||||||
		Ref: 5' caaaataaagcatcaGGACCAAt 3'
miR-133b	MYOD1	Query: 3' tatcgaccaacTTCCCCTGGTTt 5'
		|| |||||||
		Ref: 5' tacagagaagtAAAAGGACCAAt 3'
miR-1343	ANKRD2	Query: 3' cgctctCACGCCCGGGGTCCTc 5'
		|||: ||||||||
		Ref: 5' tcctctGTGTTCACCCCAGGAa 3'
miR-1343	CALCRL	Query: 3' cgctctcacgcccGGGGTCCTc 5'
		||||||||
		Ref: 5' cttactctcttctCCCCAGGAa 3'
miR-1343	ENG	Query: 3' cgCTCTCAC-GCCCGGGGTCCTc 5'
		|:||| | | |:|||||||
		Ref: 5' caGGGAGGGACTTGTCCCAGGAg 3'
miR-1343	ENG	Query: 3' cgctctcacgcccGGGGTCCTc 5'
		:|||||||
		Ref: 5' ggccatgaacttaTCCCAGGAc 3'
miR-1343	MAFF	Query: 3' cgctctcacgcccGGGGTCCTc 5'
		:|||||||
		Ref: 5' cccctcttcacccTCCCAGGAt 3'
miR-1343	MYOD1	Query: 3' cgctcTCACGCCCGGGGTCCTc 5'
		||| | | |||||||
		Ref: 5' aattcAGTCCCTGGCCCAGGAa 3'
miR-136	COPS2	Query: 3' aggtagtagttttgtTTACCTCa 5'
		|||||||
		Ref: 5' caaggtgactaccgtAATGGAGa 3'
miR-136	DLG1	Query: 3' agGTAGTAGTTTTGTTTACCTCa 5'
		||| ||| : | ||||||||
		Ref: 5' taCAT-ATCTGTA-AAATGGAGa 3'
miR-136	ITGA8	Query: 3' aggtagtagtttTGTTTACCTCa 5'
		:|||||||||
		Ref: 5' cactttggatgtGCAAATGGAGa 3'
miR-136	ITGA8	Query: 3' aggtagtagttttgtTTACCTCa 5'
		|||||||
		Ref: 5' cagaattcgtcctttAATGGAGc 3'
miR-136	MSTN	Query: 3' agGTAGTAGTTT-----TGTTTACCTCa 5'
		|||: ||| | |||||||||
		Ref: 5' tgCATTTTCATACTCTTTCAAATGGAGa 3'
miR-136	MSTN	Query: 3' aggtagTAGTTTTGTTTACCTCa 5'
		| :| || |||||||
		Ref: 5' ctctgaAGTACAAATAATGGAGg 3'
miR-136	MSTN	Query: 3' aggTAGTAGTTTTGTTTACCTCa 5'
		| | | | | |||||||
		Ref: 5' aggACCTTGATCTCTAATGGAGg 3'
miR-136	MYOD1	Query: 3' agGTAGTAGTTTTGTTTACCTCa 5'
		::|:| ||: || |||||||
		Ref: 5' ggTGTTAACAGTAC-AATGGAGa 3'
miR-142-3p	CFL2	Query: 3' ggtatttcaTCCTTTGTGATGt 5'
		|| | |||||||
		Ref: 5' tttccattgAGTATACACTACt 3'
miR-142-3p	ITGA8	Query: 3' ggtatttcatccttTGTGATGt 5'
		|||||||
		Ref: 5' gaccaaaccttcccACACTACt 3'
miR-142-3p	TIPARP	Query: 3' ggtatttCATCCTTTGTGATGt 5'
		||| |||||||
		Ref: 5' caaccctGTATCTTACACTACt 3'
miR-142-5p	CFL2	Query: 3' tcatcacgaaagaTGAAATAc 5'
		|||||||
		Ref: 5' ggtaagatggtaaACTTTATt 3'
miR-142-5p	COPS2	Query: 3' tcatcacGAAAGATGAAATAc 5'
		|| |: |||||||
		Ref: 5' tcacacaCTATTAACTTTATa 3'
miR-142-5p	DLG1	Query: 3' tcatcaCGA-AAGATGAAATAc 5'
		||| | |||||||
		Ref: 5' agaacaGCTAATAAACTTTATt 3'
miR-142-5p	DLG1	Query: 3' tcATCACGAA-AGA--TGAAATAc 5'
		|| | || || |||||||
		Ref: 5' aaTATTAATTGACTAGACTTTATc 3'
miR-142-5p	ITGA8	Query: 3' tcAT-CACGAAAGATGAAATAc 5'
		|| |||| ||||||||
		Ref: 5' ttTATGTGC--AATACTTTATa 3'
miR-142-5p	MEOX2	Query: 3' tcATCACGAAAGATGAAATAc 5'
		|| | ||| : |||||||
		Ref: 5' agTACTACTTGTAACTTTATa 3'
miR-142-5p	PLAGL1	Query: 3' tcATCACGAAAGA-----TGAAATAc 5'
		|| ||:| || |||||||
		Ref: 5' aaTAATGTTAACTAAGTAACTTTATg 3'
miR-1468	ENG	Query: 3' agtcgttTTGTCCGTTTGCCTc 5'
		| | | |||||||
		Ref: 5' taccttcATCTGTAAAACGGAc 3'
miR-1468	MTM1	Query: 3' agtcgtTTTGTC--CGTTTGCCTc 5'
		| :||| | |||||||
		Ref: 5' aaatatATGCAGATGAAAACGGAt 3'
miR-146a-5p	COPS2	Query: 3' ttGGGTACCTTA--AGTCAAGAGt 5'
		|:| |||||| ||||||||
		Ref: 5' agCTCTTGGAATGCCCAGTTCTCt 3'
miR-146a-5p	FOXN2	Query: 3' ttGGGTACCTT-AAGTCAAGAGt 5'
		::::| || | |||||||
		Ref: 5' atTTTGTTCAACTGAAGTTCTCt 3'
miR-146a-5p	MAFF	Query: 3' ttgggTACCTTAAGTCAAGAGt 5'
		|| |:| |||||||
		Ref: 5' tctgaATAAAGTCAAGTTCTCt 3'
miR-146a-5p	PLAGL1	Query: 3' ttGGGTAC-CTTAAGTCAAGAGt 5'
		|::: | ||| |||||||
		Ref: 5' ggCTTGAGAGAAGAGAGTTCTCg 3'
miR-150	CCL5	Query: 3' gtGACCATGTTC---CCAACCCTCt 5'
		|| || | || | |||||||
		Ref: 5' ctCTTGTCCCAGCCAGCTTGGGAGg 3'
miR-150	COPS2	Query: 3' gtGACCATGTTCCCAACCCTCt 5'
		:||| :: |||||||||||
		Ref: 5' ctTTGGGGT-AGGGTTGGGAGt 3'
miR-150	COPS2	Query: 3' gtgaccatgttcccAACCCTCt 5'
		|||||||
		Ref: 5' cttgtttgttttttTTGGGAGt 3'
miR-150	MAFF	Query: 3' gtgaccATGTTCCCAACCCTCt 5'
		| | || |||||||
		Ref: 5' tcatccTTCTTGGTTTGGGAGg 3'
miR-150	MYOD1	Query: 3' gtgacCAT--GTTCCC--AACCCTCt 5'
		||| || ||| |||||||
		Ref: 5' ccgcaGTACCCATGGGCCTTGGGAGt 3'
miR-150	SOX11	Query: 3' gtGACCATGT----TCCC----AACCCTCt 5'
		| |||:|| |||| |||||||
		Ref: 5' ggCGGGTGCAGAGCAGGGTTCCTTGGGAGg 3'
miR-151-3p	COPS2	Query: 3' aggagttcctcgaaGTCAGATc 5'
		|||||||
		Ref: 5' tttcctaattccagCAGTCTAc 3'
miR-151-3p	ENG	Query: 3' agGAGTTCCTCGA---AGTCAGATc 5'
		|||||| || |||||||
		Ref: 5' agCTCAAGTCCCTGGGCCAGTCTAg 3'
miR-16	ATF3	Query: 3' gcGGTTATAAATGCACGACGAt 5'
		|||: | | | ||||||||
		Ref: 5' ggCCAGCAGTGA-GTGCTGCTg 3'
miR-16	COPS2	Query: 3' gcGGTTATAAATGCACGACGAt 5'
		|::| :| | : |||||||
		Ref: 5' ctCTGAGGTATCTTTGCTGCTg 3'
miR-16	COPS2	Query: 3' gcGGTT-A-TAAATGC---ACGACGAt 5'
		:||| | :|||::| |||||||
		Ref: 5' gaTCAACTGGTTTGTGTTTTGCTGCTg 3'
miR-16	ENG	Query: 3' gcGGTTATAAATG-CACGACGAt 5'
		| ::|: | | ||||||||
		Ref: 5' tgCAGGTGGCTCCAGTGCTGCTg 3'
miR-16	ENG	Query: 3' gcggttataaatgcACGACGAt 5'
		|||||||
		Ref: 5' tgtaggctggcagcTGCTGCTc 3'
miR-16	FOXN2	Query: 3' gcggTTATAAATGCACGACGAt 5'
		|| |||| |||||||
		Ref: 5' gctaAAAATTT---TGCTGCTg 3'
miR-16	LAMP2	Query: 3' gcGGTTATAAATGCACGACGAt 5'
		| |:||||| | |||||||
		Ref: 5' atCAAGTATTT-CTTGCTGCTt 3'
miR-16	MEOX2	Query: 3' gcggttATAAATGCACGACGAt 5'
		||| || |||||||
		Ref: 5' attttcTATCAAC-TGCTGCTa 3'
miR-16	MAFF	Query: 3' gcGGTTATAAATGCACGACGAt 5'
		||| : || | |||||||
		Ref: 5' agCCACGGCTT-CCTGCTGCTg 3'
miR-16	MYOD1	Query: 3' gcggttataaaTGC-ACGACGAt 5'
		:|| |||||||
		Ref: 5' caacggagggcGCGCTGCTGCTt 3'
miR-181c	CALCRL	Query: 3' tgagtggCTGTCCAACTTACAa 5'
		|| || |||||||
		Ref: 5' tcagtgaGAAAGAATGAATGTa 3'
miR-181c	CALCRL	Query: 3' tgAGT--GGCTGT-CCAACTTACAa 5'
		||| ::|||| |||||||
		Ref: 5' taTCAGCTTGACATCACTGAATGTa 3'
miR-181c	CFL2	Query: 3' tgaGTGGCTGTCCAACTTACAa 5'
		|||: ||| |||||||
		Ref: 5' aagCACT-ACA--ATGAATGTg 3'
miR-181c	COPS2	Query: 3' tgaGTGGCTGTCCA---ACTTACAa 5'
		||: ||||| | |||||||
		Ref: 5' gaaCATAGACAGCTAAATGAATGTt 3'
miR-181c	COPS2	Query: 3' tgaGTGGCTGTCCAACTTACAa 5'
		|:| | : ||||||||
		Ref: 5' agaCGCAGCTCATTTGAATGTa 3'
miR-181c	COPS2	Query: 3' tgagtggCTG-TCCA-ACTTACAa 5'
		||: || | |||||||
		Ref: 5' tctttaaGATGAGATATGAATGTa 3'
miR-181c	DLG1	Query: 3' tgaGTGGCTGTCCAACTTACAa 5'
		:| :||:| ||||||||
		Ref: 5' gaaTAATGATATTTTGAATGTt 3'
miR-181c	DLG1	Query: 3' tgaGTGGCTGTCCAACTTACAa 5'
		||::| | |||||||
		Ref: 5' ttaCATTG-CTTTCTGAATGTc 3'
miR-181c	MEOX2	Query: 3' tgagtggctgtccaACTTACAa 5'
		|||||||
		Ref: 5' aaaagataaaattcTGAATGTc 3'
miR-181c	MSTN	Query: 3' tgAGTGGC-TGTCCAACTTACAa 5'
		| :|:| |:| |||||||
		Ref: 5' gaTGGCTGTATAATGTGAATGTg 3'
miR-181c	MTM1	Query: 3' tgaGTGGC-TGTCCAACTTACAa 5'
		|:|:| :||| |||||||
		Ref: 5' tcgCGCTGCTTAGG-TGAATGTt 3'
miR-182	FOXN2	Query: 3' tcacactcaAGATGGT-AACGGTTt 5'
		| ||: | |||||||
		Ref: 5' gtataaaaaTGTATAATTTGCCAAt 3'
miR-182	MEF2D	Query: 3' tcACAC-TCAAGA-TGGT-AACGGTTt 5'
		| || || || : || |||||||
		Ref: 5' ccTCTGAAGAACTGGGCATTTGCCAAa 3'
miR-182	MTM1	Query: 3' tcaCACTCAAGATGGTAACGGTTt 5'
		||| || |: ||||||||
		Ref: 5' aagGTG-TTTAAATAATTGCCAAa 3'
miR-195	ATF3	Query: 3' cggttataaagaCACGACGAt 5'
		||||||||
		Ref: 5' ggccagcagtgaGTGCTGCTg 3'
miR-195	COPS2	Query: 3' cgGTTATAAAGACACGACGAt 5'
		::| :| ||| |||||||
		Ref: 5' tcTGAGGTATCTTTGCTGCTg 3'
miR-195	COPS2	Query: 3' cggttATAAAGACACGACGAt 5'
		|:| |:| |||||||
		Ref: 5' tggttTGTGTTT-TGCTGCTg 3'
miR-195	ENG	Query: 3' cggttataAAGACACGACGAt 5'
		| | ||||||||
		Ref: 5' caggtggcTCCAGTGCTGCTg 3'
miR-195	ENG	Query: 3' cggttataaagacACGACGAt 5'
		|||||||
		Ref: 5' gtaggctggcagcTGCTGCTc 3'
miR-195	FOXN2	Query: 3' cggTTATAAAGACACGACGAt 5'
		|| |||| |||||||
		Ref: 5' ctaAAAATTT---TGCTGCTg 3'
miR-195	LAMP2	Query: 3' cggTTATAAAGACACGACGAt 5'
		|:||||||| |||||||
		Ref: 5' tcaAGTATTTCT-TGCTGCTt 3'
miR-195	MEOX2	Query: 3' cggttataaagacACGACGAt 5'
		|||||||
		Ref: 5' attttctatcaacTGCTGCTa 3'
miR-195	MAFF	Query: 3' cgGTTATAAAGACACGACGAt 5'
		|| : ||| |||||||
		Ref: 5' gcCACGGCTTC-CTGCTGCTg 3'
miR-195	MYOD1	Query: 3' cggttataaagacACGACGAt 5'
		|||||||
		Ref: 5' acggagggcgcgcTGCTGCTt 3'
miR-199b-5p	ATF3	Query: 3' ttgTCTATCAG-ATTTGTGACCc 5'
		||| |||| | |||||||
		Ref: 5' gtgAGAAAGTCATTCACACTGGc 3'
miR-199b-5p	CALCRL	Query: 3' ttgtctATC-AG-ATTTGTGACCc 5'
		|:| || |:||||||||
		Ref: 5' gaacatTGGATCATGAACACTGGa 3'
miR-199b-5p	ITGA8	Query: 3' ttGTCTAT-CAG-ATTTGTGACCc 5'
		|| |: ||| |: |||||||
		Ref: 5' tcCAATTGTGTCATGTACACTGGt 3'
miR-199b-5p	ITGA8	Query: 3' ttgTC-TATCAGATTTGTGACCc 5'
		|| || ||:| |||||||
		Ref: 5' aaaAGCAT-GTTT--ACACTGGc 3'
miR-199b-5p	MYOD1	Query: 3' ttGTCTATCAGAT-TTGTGACCc 5'
		||| | | ||: ||||||||
		Ref: 5' caCAGCTTG-CTGCAACACTGGg 3'
miR-199b-5p	MYOD1	Query: 3' ttgTCTATC-AGATT----TGTGACCc 5'
		:| |:| |||:| |||||||
		Ref: 5' ctgGGCTGGATCTGAGGGGACACTGGg 3'
miR-199b-5p	RB1	Query: 3' ttgTCTATCAGATTTGTGACCc 5'
		| ||:|||| |||||||
		Ref: 5' tcaACATGGTCT-TACACTGGc 3'
miR-19a	CALCRL	Query: 3' agtcaaaacGTA-TCTAAACGTGt 5'
		||| ||||||||||
		Ref: 5' taggtccctCATCAGATTTGCACa 3'
miR-19a	CFL2	Query: 3' agTCAAAACGTATCTAAACGTGt 5'
		:| || | || |||||||
		Ref: 5' atGGCTTGGAAT-CTTTTGCACt 3'
miR-19a	CFL2	Query: 3' agtcaaaacGTATCTAAACGTGt 5'
		:|| |||||||
		Ref: 5' atcaggaatTATTTTTTTGCACt 3'
miR-19a	ID2	Query: 3' agtcaaaacgtatctAAACGTGt 5'
		|||||||
		Ref: 5' cccacacccacccccTTTGCACa 3'
miR-19a	MEF2D	Query: 3' agtcaaaacgtatctAAACGTGt 5'
		|||||||
		Ref: 5' gggaaggggggacacTTTGCACg 3'
miR-19b	CALCRL	Query: 3' agtcaaaacGTA-CCTAAACGTGt 5'
		||| |||||||||
		Ref: 5' taggtccctCATCAGATTTGCACa 3'
miR-19b	CFL2	Query: 3' agtcaaAACGTACCT----AAACGTGt 5'
		| || |||| |||||||
		Ref: 5' tatgaaTGGCTTGGAATCTTTTGCACt 3'
miR-19b	CFL2	Query: 3' agtcaaaacGTACCTAAACGTGt 5'
		:|| |||||||
		Ref: 5' atcaggaatTATTTTTTTGCACt 3'
miR-19b	ID2	Query: 3' agtcaaaacgtacctAAACGTGt 5'
		|||||||
		Ref: 5' cccacacccacccccTTTGCACa 3'
miR-19b	MEF2D	Query: 3' agtcaaaacgtacctAAACGTGt 5'
		|||||||
		Ref: 5' gggaaggggggacacTTTGCACg 3'
miR-206	IGF1	Query: 3' agTGTGTGAAGGAATGTAAGGt 5'
		|:|||| : |||||||
		Ref: 5' aaATACACAAGTAAACATTCCa 3'
miR-206	MEOX2	Query: 3' agtgtgTGAAGGAA---TGTAAGGt 5'
		|||| ||| |||||||
		Ref: 5' aggtgaACTTGCTTTGAACATTCCa 3'
miR-206	MEOX2	Query: 3' agTGTGTGAAGGAA---TGTAAGGt 5'
		|:: |:|| ||| |||||||
		Ref: 5' agATGAATTTGCTTTGAACATTCCa 3'
miR-206	MSTN	Query: 3' agtgtgtgaaggaATGTAAGGt 5'
		||||||||
		Ref: 5' cctgtaaaccaggTACATTCCc 3'
miR-214	CALCRL	Query: 3' gacggacagacaCGGACGACa 5'
		||||||||
		Ref: 5' ttgtacaaagaaGCCTGCTGg 3'
miR-214	COPS2	Query: 3' gacggACAGACACGGACGACa 5'
		| |:| |||||||
		Ref: 5' tgttaTTTTTAAACCTGCTGg 3'
miR-214	COPS2	Query: 3' gacggacagacacGGACGACa 5'
		|||||||
		Ref: 5' ttttagggccacaCCTGCTGc 3'
miR-214	ENG	Query: 3' gacGGACAGAC-ACGGACGACa 5'
		||| || | ||||||||
		Ref: 5' ctcCCTCTCAGAGGCCTGCTGc 3'
miR-214	MAFF	Query: 3' gacgGACAGACACGGACGACa 5'
		|| |||| |||||||
		Ref: 5' agagCTTCCTGTCCCTGCTGt 3'
miR-214	MAFF	Query: 3' gacggacagacACGGACGACa 5'
		| |||||||
		Ref: 5' aaagccacggcTTCCTGCTGc 3'
miR-214	MEF2D	Query: 3' gaCGGACAGACA-CGGACGACa 5'
		||:| | || |||||||
		Ref: 5' caGCTTACCCGTCACCTGCTGa 3'
miR-214	TIPARP	Query: 3' gacggACAGACA-CGGACGACa 5'
		| ||| | ||||||||
		Ref: 5' caagaTATCTCTAGCCTGCTGt 3'
miR-218	FOXN2	Query: 3' tgtaccAATCTAGTTCGTGTt 5'
		|| | |||||||
		Ref: 5' cattttTTTCTTAAAGCACAt 3'
miR-218	LAMP2	Query: 3' tgtaccAATC-TAG--TTCGTGTt 5'
		| || ||: |||||||
		Ref: 5' aaaaaaTAAGAATTGGAAGCACAa 3'
miR-218	MEF2D	Query: 3' tgtaccaatcTAGTTCGTGTt 5'
		|| |||||||
		Ref: 5' gggggcccctATGAAGCACAt 3'
miR-218	MSTN	Query: 3' tgtaccaatctAGTTCGTGTt 5'
		|:|||||||
		Ref: 5' gctacagtcacTTAAGCACAa 3'
miR-218	MYOD1	Query: 3' tgtaccAATCTAGTTCGTGTt 5'
		| | ||:|||||||
		Ref: 5' agcattTAAAATTAAGCACAg 3'
miR-218	MYOD1	Query: 3' tgTACCAATCTAGTTCGTGTt 5'
		:||| ||| |||||||
		Ref: 5' ggGTGG-GAGAAAAAGCACAg 3'
miR-218	MYOD1	Query: 3' tgtaccaatctagTTCGTGTt 5'
		|||||||
		Ref: 5' ggtgcagccctaaAAGCACAa 3'
miR-218-5p	FOXN2	Query: 3' tgtaccAATCTAGTTCGTGTt 5'
		|| | |||||||
		Ref: 5' cattttTTTCTTAAAGCACAt 3'
miR-218-5p	LAMP2	Query: 3' tgtaccAATC-TAG--TTCGTGTt 5'
		| || ||: |||||||
		Ref: 5' aaaaaaTAAGAATTGGAAGCACAa 3'
miR-218-5p	MEF2D	Query: 3' tgtaccaatcTAGTTCGTGTt 5'
		|| |||||||
		Ref: 5' gggggcccctATGAAGCACAt 3'
miR-218-5p	MSTN	Query: 3' tgtaccaatctAGTTCGTGTt 5'
		|:|||||||
		Ref: 5' gctacagtcacTTAAGCACAa 3'
miR-218-5p	MYOD1	Query: 3' tgtaccAATCTAGTTCGTGTt 5'
		| | ||:|||||||
		Ref: 5' agcattTAAAATTAAGCACAg 3'
miR-218-5p	MYOD1	Query: 3' tgTACCAATCTAGTTCGTGTt 5'
		:||| ||| |||||||
		Ref: 5' ggGTGG-GAGAAAAAGCACAg 3'
miR-218-5p	MYOD1	Query: 3' tgtaccaatctagTTCGTGTt 5'
		|||||||
		Ref: 5' ggtgcagccctaaAAGCACAa 3'
miR-218b	FOXN2	Query: 3' gtGTACCAATCTAG-TTCGTGTt 5'
		||| || |: |||||||
		Ref: 5' gcCATTTTTTTCTTAAAGCACAt 3'
miR-218b	LAMP2	Query: 3' gtgtaccAATC-TAG--TTCGTGTt 5'
		| || ||: |||||||
		Ref: 5' aaaaaaaTAAGAATTGGAAGCACAa 3'
miR-218b	MEF2D	Query: 3' gtgtaccaatcTAGTTCGTGTt 5'
		|| |||||||
		Ref: 5' cgggggcccctATGAAGCACAt 3'
miR-218b	MSTN	Query: 3' gtgtaccaatctAGTTCGTGTt 5'
		|:|||||||
		Ref: 5' tgctacagtcacTTAAGCACAa 3'
miR-218b	MYOD1	Query: 3' gtGTACCAATCTAGTTCGTGTt 5'
		||| | | ||:|||||||
		Ref: 5' agCAT-TTAAAATTAAGCACAg 3'
miR-218b	MYOD1	Query: 3' gtgTACCAATCTAGTTCGTGTt 5'
		:||| ||| |||||||
		Ref: 5' gggGTGG-GAGAAAAAGCACAg 3'
miR-218b	MYOD1	Query: 3' gtgtaccaatctagTTCGTGTt 5'
		|||||||
		Ref: 5' gggtgcagccctaaAAGCACAa 3'
miR-22-3p	ENG	Query: 3' tgtcaaGAAGTTGACCGTCGAa 5'
		| ||::| |||||||
		Ref: 5' ctgtggCGTCGGCCGGCAGCTg 3'
miR-22-3p	ENG	Query: 3' tgtcaagaAGTTGACCGTCGAa 5'
		| ::|||||||||
		Ref: 5' ctgtgatgTAGGCTGGCAGCTg 3'
miR-22-3p	MAFF	Query: 3' tgtcaagaagttgaCCGTCGAa 5'
		|||||||
		Ref: 5' tggccctggggaggGGCAGCTc 3'
miR-22-5p	COPS2	Query: 3' attTCGAACGGTGACTTCTTGa 5'
		||: | | |||||||
		Ref: 5' tatAGTGTCAAAAGGAAGAACt 3'
miR-22-5p	MEF2D	Query: 3' atttcGAACGGTGACTTCTTGa 5'
		||| || |||||||||
		Ref: 5' cactcCTT-CCTCTGAAGAACt 3'
miR-24-1-5p	CALCRL	Query: 3' tgacACAAAGTCGAGTCATCCGTg 5'
		| |||::|: |||||||
		Ref: 5' accaTCTTTTGGT---GTAGGCAa 3'
miR-24-3p	DLG1	Query: 3' gacaaggacgacttGACTCGGt 5'
		|||||||
		Ref: 5' ttgtatagattatcCTGAGCCt 3'
miR-24-3p	MAFF	Query: 3' gacaaggacgactTGACTCGGt 5'
		||||||||
		Ref: 5' --------tgcccACTGAGCCc 3'
miR-24-3p	MEF2D	Query: 3' gaCAAGGACG-AC-TTGACTCGGt 5'
		|| ||| : || |||||||
		Ref: 5' gtGTACCTTTGTGTCTCTGAGCCc 3'
miR-24-3p	MYOD1	Query: 3' gacaaggACGACTT----GACTCGGt 5'
		| ||||| |||||||
		Ref: 5' agttgggTTCTGAACCCGCTGAGCCa 3'
miR-27b-5p	MAFF	Query: 3' acaAGTGGTTAGTCGATTCGAGa 5'
		| | || :: ||||||||
		Ref: 5' cccTAAGAAAGTGCCTAAGCTCa 3'
miR-27b-5p	MEF2D	Query: 3' acaAGTGGT-TAGTCGATTCGAGa 5'
		|| |:: :| | ||||||||
		Ref: 5' gaaTCTCTGCGTGAACTAAGCTCt 3'
miR-28-5p	ENG	Query: 3' gagttatctgacacTCGAGGAa 5'
		|||||||
		Ref: 5' gagtgggggagcctAGCTCCTc 3'
miR-28-5p	MEOX2	Query: 3' gagTTATCTGACACTCGAGGAa 5'
		||| || | |||||||
		Ref: 5' taaAATTTAC-CT-AGCTCCTc 3'
miR-28-5p	MEF2D	Query: 3' gagttatctGACACTCGAGGAa 5'
		|| |||||||
		Ref: 5' ccagccctcCTCCCAGCTCCTt 3'
miR-28-5p	MEF2D	Query: 3' gagttatctgacacTCGAGGAa 5'
		|||||||
		Ref: 5' cctcacggaagcccAGCTCCTc 3'
miR-28-5p	MYOD1	Query: 3' gagttatcTGAC--ACTCGAGGAa 5'
		|:|| |||||||||
		Ref: 5' tcctcaccATTGCATGAGCTCCTc 3'
miR-28-5p	NR4A3	Query: 3' gaGTTATCTGACAC-TCGAGGAa 5'
		:|| ||| | |||||||
		Ref: 5' ctTAAGAGAAAAAGCAGCTCCTg 3'
miR-28-5p	PFKM	Query: 3' gaGTTATCTGACACTCGAGGAa 5'
		||:|| | || |||||||
		Ref: 5' ggCAGTA-AGTGGAAGCTCCTt 3'
miR-28-5p	PFKM	Query: 3' gaGTTATCTGACACTCGAGGAa 5'
		|| ||:| |||||||||
		Ref: 5' caCACAAGGC--TGAGCTCCTc 3'
miR-28-5p	PLAGL1	Query: 3' gagttatctgacacTCGAGGAa 5'
		|||||||
		Ref: 5' ctaaccttttttaaAGCTCCTt 3'
miR-296-3p	ATF3	Query: 3' cctTTCGG--AGGCG-GGTTGGGa 5'
		::||| ||| | |||||||
		Ref: 5' gccGGGCCGTTCCACTCCAACCCa 3'
miR-296-3p	ENG	Query: 3' cctttcggaggcGGGTTGGGa 5'
		||||||||
		Ref: 5' ttatcccaggacCCCAACCCc 3'
miR-296-3p	MAFF	Query: 3' cctTTCGGAGGCGGGTTGGGa 5'
		::||: | |||||||
		Ref: 5' tgtGGGCTGGGGGCCAACCCc 3'
miR-296-3p	MEF2D	Query: 3' cctTTCGGAGGCG--GGTTGGGa 5'
		::||| |||| |||||||
		Ref: 5' cctGGGCCACCGCCTCCAACCCc 3'
miR-296-3p	TIPARP	Query: 3' cctttcGGAGGCGGGTTGGGa 5'
		:| |:| |||||||
		Ref: 5' ctgggtTCCCTGGCCAACCCt 3'
miR-299	CALCRL	Query: 3' catacaccctgccATTTGGTa 5'
		|||||||
		Ref: 5' aaactatcaagtaTAAACCAt 3'
miR-299	ENG	Query: 3' catacaccctgccATTTGGTa 5'
		|||||||
		Ref: 5' tactcaccaccaaTAAACCAg 3'
miR-299	MSTN	Query: 3' catacACCCTGCCATTTGGTa 5'
		|| | ||||||||
		Ref: 5' aacaaTGTACCTGTAAACCAg 3'
miR-299	TIPARP	Query: 3' catacaccctgcCATTTGGTa 5'
		||||||||
		Ref: 5' caattataacttGTAAACCAg 3'
miR-29a	CFL2	Query: 3' attggctaaaGTCTACCACGATc 5'
		:| | |||||||
		Ref: 5' ctttaaaaggTATACGGTGCTAa 3'
miR-29a	DLG1	Query: 3' atTGGCTAAAGTCTACCACGATc 5'
		:||| ||:| |||||||
		Ref: 5' agGCCGTGTTTA---GGTGCTAg 3'
miR-29a	ENG	Query: 3' atTGGCTA--AA-GTCTACCACGATc 5'
		||:|:| || ||| |||||||
		Ref: 5' ttACTGGTCCTTGCAGTGGGTGCTAg 3'
miR-29a	FOXN2	Query: 3' attggctaaagTCTACCACGATc 5'
		||: |||||||
		Ref: 5' gggttggggggAGG-GGTGCTAa 3'
miR-29a	MSTN	Query: 3' atTGGCTAAAGTCTACCACGATc 5'
		|:: || || |||||||||
		Ref: 5' caATTCATGCCA-ATGGTGCTAa 3'
miR-29c	ENG	Query: 3' attggctaaagTTTACCACGAt 5'
		|: |||||||
		Ref: 5' gaagacgagggAGCTGGTGCTg 3'
miR-29c	MSTN	Query: 3' attggctaAAGTTTACCACGAt 5'
		| | |||||||||
		Ref: 5' acaattcaTGCCAATGGTGCTa 3'
miR-30a-3p	CALCRL	Query: 3' cgACGTTTGTAGGCTGACTTTc 5'
		||: | : ||| |||||||
		Ref: 5' aaTGTTATTTTCC-ACTGAAAt 3'
miR-30a-3p	CALCRL	Query: 3' cgacgtTTGTAGGCTGACTTTc 5'
		| :||:| |||||||
		Ref: 5' ccaggtACTATTC-ACTGAAAa 3'
miR-30a-3p	COPS2	Query: 3' cgacgtttgtagGCTGACTTTc 5'
		:||||||||
		Ref: 5' ccggtttggcagTGACTGAAAa 3'
miR-30a-3p	DLG1	Query: 3' cgaCGTTTGTAGGCTGACTTTc 5'
		|||: | : |||||||
		Ref: 5' ttgGCAGTGAAGT-ACTGAAAt 3'
miR-30a-3p	ITGA8	Query: 3' cgACGTTTGTAGGCTGACTTTc 5'
		| :|| |||| |||||||
		Ref: 5' aaTTTAACCATC--ACTGAAAc 3'
miR-30a-3p	MEOX2	Query: 3' cgACGTTTGTAGGC-TGACTTTc 5'
		||| :: ::| |||||||
		Ref: 5' ttTGCTTTTGCTTGCACTGAAAa 3'
miR-30a-3p	MEF2D	Query: 3' cgacgttTGTAGGCTGACTTTc 5'
		||| : ||||||||
		Ref: 5' accccttACAATAGACTGAAAc 3'
miR-30a-3p	MSTN	Query: 3' cgacGTTTGTAGGCTGACTTTc 5'
		:||| | | |||||||
		Ref: 5' aaaaTAAAAA--C-ACTGAAAg 3'
miR-30a-3p	MYOD1	Query: 3' cgacgTTTGTAGGCTGACTTTc 5'
		||: ||| |||||||
		Ref: 5' tccagAAGGATC--ACTGAAAa 3'
miR-30a-3p	MYOD1	Query: 3' cgaCGTTTGTAGGCTGACTTTc 5'
		|::::|| ||||||||
		Ref: 5' ggaGTGGGCA--AGACTGAAAa 3'
miR-30a-3p	NR4A3	Query: 3' cgacgtttGTAGGCTGACTTTc 5'
		| | :||||||||
		Ref: 5' cacttttcCTTATGACTGAAAg 3'
miR-30a-3p	TIPARP	Query: 3' cgACGTTTGTAGGCTGACTTTc 5'
		| || | | | |||||||
		Ref: 5' gtTTCATAAAACGTACTGAAAg 3'
miR-30e-3p	CALCRL	Query: 3' cgACATTTGTAGGCTGACTTTc 5'
		||| | : ||| |||||||
		Ref: 5' aaTGTTATTTTCC-ACTGAAAt 3'
miR-30e-3p	CALCRL	Query: 3' cgaCATTTGTAGGCTGACTTTc 5'
		|| | :||:| |||||||
		Ref: 5' cagGT-ACTATTC-ACTGAAAa 3'
miR-30e-3p	COPS2	Query: 3' cgacATTTGTAGGCTGACTTTc 5'
		| ::|| :||||||||
		Ref: 5' cggtTTGGCA-GTGACTGAAAa 3'
miR-30e-3p	DLG1	Query: 3' cgaCATTTGTAGGCTGACTTTc 5'
		||:|| :| |||||||
		Ref: 5' gcaGTGAA-GT---ACTGAAAt 3'
miR-30e-3p	ITGA8	Query: 3' cgACATTTGTAGGCTGACTTTc 5'
		| ||| |||| |||||||
		Ref: 5' aaTTTAACCATC--ACTGAAAc 3'
miR-30e-3p	MEOX2	Query: 3' cgacattTGTAGGCTGACTTTc 5'
		:| | | |||||||
		Ref: 5' tgcttttGCTTGC-ACTGAAAa 3'
miR-30e-3p	MEF2D	Query: 3' cgacattTGTAGGCTGACTTTc 5'
		||| : ||||||||
		Ref: 5' accccttACAATAGACTGAAAc 3'
miR-30e-3p	MSTN	Query: 3' cgacATTTGTAGGCTGACTTTc 5'
		|||| | | |||||||
		Ref: 5' aaaaTAAAAA--C-ACTGAAAg 3'
miR-30e-3p	MYOD1	Query: 3' cgaCATTTGTAGGCTGACTTTc 5'
		||:::|| ||||||||
		Ref: 5' ggaGTGGGCA--AGACTGAAAa 3'
miR-30e-3p	MYOD1	Query: 3' cgacaTTTGTAGGCTGACTTTc 5'
		||: ||| |||||||
		Ref: 5' tccagAAGGATC--ACTGAAAa 3'
miR-30e-3p	NR4A3	Query: 3' cgacatttGTAGGCTGACTTTc 5'
		| | :||||||||
		Ref: 5' cacttttcCTTATGACTGAAAg 3'
miR-30e-3p	TIPARP	Query: 3' cgacaTTTGTAGGCTGACTTTc 5'
		||||:| |||||||
		Ref: 5' tcataAAACGT---ACTGAAAg 3'
miR-323	COPS2	Query: 3' tctccagctggCACATTACACg 5'
		|| |||||||
		Ref: 5' ttatgacttaaGTCTAATGTGg 3'
miR-323	FOXN2	Query: 3' tcTCCAGCT-GGCACATTACACg 5'
		| || || : | |||||||
		Ref: 5' caAAGTAGAGTATTTTAATGTGa 3'
miR-323	MSTN	Query: 3' tcTCCAGCTGGCACATTACACg 5'
		| | :|:|:|| |||||||
		Ref: 5' tcATGATGGCTGTATAATGTGa 3'
miR-323	MSTN	Query: 3' tctccAGCTGGCACATTACACg 5'
		|| | | |||||||
		Ref: 5' ttattTCTTACATCTAATGTGt 3'
miR-323	MTM1	Query: 3' tctccagcTGGCACATTACACg 5'
		||| | |||||||
		Ref: 5' gcgttaaaACCAT-TAATGTGt 3'
miR-335	CCL5	Query: 3' gtaaaaagcAATAACGAGAACt 5'
		|| |||||||||
		Ref: 5' tcctactgcTTCTTGCTCTTGt 3'
miR-335	COPS2	Query: 3' gtaaaaagcaataaCGAGAACt 5'
		|||||||
		Ref: 5' cccttaccctccaaGCTCTTGg 3'
miR-335	ITGA8	Query: 3' gtaaaaagcaataaCGAGAACt 5'
		|||||||
		Ref: 5' ctctctctgccccaGCTCTTGt 3'
miR-335	MEOX2	Query: 3' gtaaaaagCAATAACGAGAACt 5'
		|| |||||||||
		Ref: 5' gtgggcagGTATTTGCTCTTGc 3'
miR-335	MEF2D	Query: 3' gtaaaaagcaaTAACGAGAACt 5'
		:|||||||||
		Ref: 5' agtatcccaagGTTGCTCTTGg 3'
miR-335	MEF2D	Query: 3' gtaaaaagcaataACGAGAACt 5'
		||||||||
		Ref: 5' gaccccacctcccTGCTCTTGg 3'
miR-335	MEF2D	Query: 3' gtaaaaagcaaTAACGAGAACt 5'
		:| |||||||
		Ref: 5' cagaaggacagGTGGCTCTTGc 3'
miR-335	MYOD1	Query: 3' gtaaaaagcaataACGAGAACt 5'
		||||||||
		Ref: 5' gtgaaatggcctcTGCTCTTGg 3'
miR-335	MYOD1	Query: 3' gtAAAAAGCA-ATAA---CGAGAACt 5'
		| | | || | || |||||||
		Ref: 5' gcTGTATAGTATTTTCAGGCTCTTGg 3'
miR-361-3p	CCL5	Query: 3' cgtttagtcttagTGTGGACCCCc 5'
		:| |||||||
		Ref: 5' aaaacctcccaggGCTCCTGGGGg 3'
miR-361-3p	ENG	Query: 3' cgtTTAGTCTTAG-TGTGGACCCCc 5'
		|:|| | ||| : :|||||||
		Ref: 5' cccAGTCTG-ATCGGGGCCTGGGGg 3'
miR-361-3p	ENG	Query: 3' cgtttagtcttaGT-GTGGACCCCc 5'
		|| |||||||||
		Ref: 5' ggccccctccgcCACCACCTGGGGa 3'
miR-361-3p	ENG	Query: 3' cgtttaGTCTTA-GTGTGGACCCCc 5'
		||| | | |||||||
		Ref: 5' agcgccCAGCCTGGAGCCCTGGGGg 3'
miR-361-3p	MAFF	Query: 3' cgTTTAGTCTT--AGTGT--GGACCCCc 5'
		||| ::|:| | |:: |||||||
		Ref: 5' tgAAACTGGGACTTGATGGCCCTGGGGa 3'
miR-361-3p	MEF2D	Query: 3' cgtTTAGTCTTAGTGTGGACCCCc 5'
		||||| ||| |||||||
		Ref: 5' gacAATCACCCACACTCCTGGGGc 3'
miR-361-3p	MEF2D	Query: 3' cgtttAGTCTTAGTGTGGACCCCc 5'
		|::||||| | |||||||
		Ref: 5' actctTTGGAATC-C-CCTGGGGt 3'
miR-361-3p	MEF2D	Query: 3' cgtTTAGTCTTAGTGTGGACCCCc 5'
		|: |||:: | | |||||||
		Ref: 5' tgcAGGCAGGG-CTCCCCTGGGGt 3'
miR-361-3p	MEF2D	Query: 3' cgtttagtcttaGTGTGGACCCCc 5'
		||| |||||||
		Ref: 5' agacggccccggCAC-CCTGGGGt 3'
miR-361-3p	MEF2D	Query: 3' cgtttagtcttaGTGTGGACCCCc 5'
		:|: |||||||
		Ref: 5' tccttttctctcTATCCCTGGGGc 3'
miR-361-3p	MYOD1	Query: 3' cgTTTAGTCTTAGTGTGGACCCCc 5'
		|| |:|||||| | |||||||
		Ref: 5' acAACTTAGAATC-C-CCTGGGGc 3'
miR-361-3p	MYOD1	Query: 3' cgtTTAGT-CTTAGTGTGGACCCCc 5'
		:| || |:| : :|||||||
		Ref: 5' ggcGAGCATGGAGAGGGCCTGGGGa 3'
miR-363	ATF3	Query: 3' aatgtctacCTATGGCACGTTAa 5'
		|| ::||||||||
		Ref: 5' gcatctcgtGAAGTCGTGCAATg 3'
miR-363	FOXN2	Query: 3' aatgTCTACCTATGGCACGTTAa 5'
		| || || ::|||||||
		Ref: 5' tttaAAATTTAT-TTGTGCAATa 3'
miR-363	ITGA8	Query: 3' aaTGTCT-ACCTATG---GCACGTTAa 5'
		||| | | |||: :|||||||
		Ref: 5' gaACAAATTTTATATTTATGTGCAATa 3'
miR-363	MEF2D	Query: 3' aatgTCTACCTATGGCACGTTAa 5'
		|||| |||| |||||||
		Ref: 5' tctaAGAT--ATACAGTGCAATa 3'
miR-363	MEF2D	Query: 3' aatgtctacctaTGGCACGTTAa 5'
		|| |||||||
		Ref: 5' cccctgcagttcACGGTGCAATa 3'
miR-369	CALCRL	Query: 3' tttCTAGTTGGTACATAATAa 5'
		||| || |||||||||
		Ref: 5' attGAT--ACAATGTATTATa 3'
miR-369	CALCRL	Query: 3' tttCTAGTTGGTACATAATAa 5'
		||| || :| |||||||
		Ref: 5' cttGAT-AAATA-GTATTATg 3'
miR-369	CALCRL	Query: 3' tttcTAGTTGGTACATAATAa 5'
		||: : :||||||||
		Ref: 5' agtcATTTTTAGTGTATTATa 3'
miR-369	CFL2	Query: 3' tttctAGTTGGTACATAATAa 5'
		|:| :|| |||||||
		Ref: 5' aaactTTATTCA-GTATTATt 3'
miR-369	DLG1	Query: 3' ttTCTAGTTGGT--ACATAATAa 5'
		|| | | || ||||||||
		Ref: 5' caAGTTGTAGCATCTGTATTATg 3'
miR-369	FOXN2	Query: 3' tttCTAGTTGG---TACATAATAa 5'
		| |:||:: | |||||||
		Ref: 5' agtGCTTAATTTTAAAGTATTATg 3'
miR-369	MSTN	Query: 3' tttctAGTTGGTA-----CATAATAa 5'
		|:|||||| |||||||
		Ref: 5' aatttTTAACCATGAATGGTATTATg 3'
miR-370	ENG	Query: 3' tggtccaaGGTGGGGTCGTCCg 5'
		|:: |||||||||
		Ref: 5' caccagccCTGGCCCAGCAGGa 3'
miR-370	ENG	Query: 3' tggtccaagGTGG-GGTCGTCCg 5'
		|:|| |||||||
		Ref: 5' tgggtggggCGCCAGCAGCAGGg 3'
miR-370	LAMP2	Query: 3' tggTCCAAGG----TGGGGTCGTCCg 5'
		|| |||| : |:|||||||
		Ref: 5' atgAGTTTCCTGGTGGCTCAGCAGGt 3'
miR-370	MEF2D	Query: 3' tggtccaaggtgGGGTCGTCCg 5'
		|:|||||||
		Ref: 5' gacgtgagatggCTCAGCAGGa 3'
miR-370	MYOD1	Query: 3' tggtcCAAGGTGGGGTCGTCCg 5'
		| | :|| |||||||
		Ref: 5' aacccGCTGAGCCACAGCAGGa 3'
miR-370	MYOD1	Query: 3' tggtccaaggtgggGTCGTCCg 5'
		|||||||
		Ref: 5' gcaagacatagtggCAGCAGGg 3'
miR-370	NR4A3	Query: 3' tggtCCAAGGTGGGGTCGTCCg 5'
		| | |:|:|||||||||
		Ref: 5' ggacGATGCTATCCCAGCAGGa 3'
miR-376a-3p	CALCRL	Query: 3' tgcacctaaaaggAGATACTa 5'
		|||||||
		Ref: 5' agtaatagaaataTCTATGAt 3'
miR-376a-3p	COPS2	Query: 3' tgcacctaAAAGGAGATACTa 5'
		| ||:|||||||
		Ref: 5' taaatcgcTCTCTTCTATGAa 3'
miR-376a-3p	FOXN2	Query: 3' tgcacctaaAAGGAGATACTa 5'
		| ::|||||||
		Ref: 5' taccttagcTATTTCTATGAt 3'
miR-376a-3p	MEF2D	Query: 3' tgcACCTAA-AAGGAGATACTa 5'
		||| || | ||||||||
		Ref: 5' cccTGGCTTCTAACTCTATGAc 3'
miR-376c	COPS2	Query: 3' atttgtaTCTTCCTTATAGGTg 5'
		|| :||:|||||||
		Ref: 5' ggttgggAGTGGGGATATCCAa 3'
miR-376c	COPS2	Query: 3' atTTGTATCTTCCTTATAGGTg 5'
		||:|| || | |||||||
		Ref: 5' taAATATCTAATG-ATATCCAa 3'
miR-376c	COPS2	Query: 3' atTTG-TATCTTCCTTATAGGTg 5'
		||| |:| |||||||||
		Ref: 5' taAACTTTGGTCAGAATATCCAc 3'
miR-376c	COPS2	Query: 3' attTGTATCTTCCTTATAGGTg 5'
		|:|| || ||||||||
		Ref: 5' tatATATTTAA--AATATCCAt 3'
miR-376c	MEOX2	Query: 3' atTTGTATCTTCC-TTATAGGTg 5'
		:| ||| || ||||||||
		Ref: 5' caGAAATACTTGGAAATATCCAt 3'
miR-382	CFL2	Query: 3' gcTTAGGT-GGTGCTTGTTGAa 5'
		| |::| ||| |||||||
		Ref: 5' atATTTTAGCCA-AAACAACTg 3'
miR-382	COPS2	Query: 3' gctTAGGTGGTGCTTGTTGAa 5'
		|| : || : |||||||
		Ref: 5' tatATATTCCTTAAACAACTg 3'
miR-382	FOXN2	Query: 3' gcttAG-GTGGTGCTTGTTGAa 5'
		|| :|::| |||||||
		Ref: 5' ttgcTCATATTAAAAACAACTt 3'
miR-411	DLG1	Query: 3' caatcacctggcACAATGTa 5'
		|||||||
		Ref: 5' tctttaaatgtaTGTTACAt 3'
miR-411	LAMP2	Query: 3' caatCACCTGGCACAATGTa 5'
		|| |||: |||||||
		Ref: 5' acacGT-GACTCTGTTACAa 3'
miR-421-3p	CALCRL	Query: 3' cgcGGGT-TAATTACAGACAACTa 5'
		:||| ||| ||||||||||
		Ref: 5' ttaTCCACATT--TGTCTGTTGAt 3'
miR-421-3p	FOXN2	Query: 3' cgcgggTTAATTACAGACAACTa 5'
		||| ::|| |||||||
		Ref: 5' taataaAATCGGTG-CTGTTGAa 3'
miR-421-3p	MEF2D	Query: 3' cgCGGGTTAAT-TACAGACAACTa 5'
		|:|||| |: :|| |||||||
		Ref: 5' gaGTCCAAGTGTGTGGCTGTTGAt 3'
miR-421-3p	MEF2D	Query: 3' cgcgggttaatTACA-GACAACTa 5'
		:||| |||||||
		Ref: 5' tcttgtgctccGTGTCCTGTTGAc 3'
miR-421-3p	MSTN	Query: 3' cgcGGGTTAATTACAGACAACTa 5'
		::::: | | ||||||||
		Ref: 5' gatTTTGGCTTCTATCTGTTGAc 3'
miR-421-3p	MYOD1	Query: 3' cgcGGGTTAATTACAGACAACTa 5'
		::::|| || ||||||||
		Ref: 5' agtTTTGATCAA-CTCTGTTGAa 3'
miR-421-3p	MYOD1	Query: 3' cgcgGGTTAATTACAGACAACTa 5'
		| :| |: | |||||||
		Ref: 5' agagCAGAGGAGGGGCTGTTGAa 3'
miR-421-3p	RB1	Query: 3' cgCGGGTTAA--TTACAGACAACTa 5'
		|::: ||| | | |||||||
		Ref: 5' taGTTTTATTCCACAGACTGTTGAc 3'
miR-424-3p	MTM1	Query: 3' tatcgtcgcggagTGCAAAAc 5'
		|||||||
		Ref: 5' cttaattggaacaACGTTTTt 3'
miR-424-3p	PLAGL1	Query: 3' tatcgtcgcggAGTGCAAAAc 5'
		| |||||||
		Ref: 5' ttcaaaaaaggTAACGTTTTa 3'
miR-424-5p	ATF3	Query: 3' aagttTTGT-ACTTAACGACGAc 5'
		|:|| |||: |||||||
		Ref: 5' tggccAGCAGTGAG-TGCTGCTg 3'
miR-424-5p	COPS2	Query: 3' aagttttGTACTTAACGACGAc 5'
		::|| ||||||||
		Ref: 5' actggttTGTGTTTTGCTGCTg 3'
miR-424-5p	COPS2	Query: 3' aaGTTTTGTACTTAACGACGAc 5'
		::|:::|| ||||||||
		Ref: 5' tcTGAGGTAT-CTTTGCTGCTg 3'
miR-424-5p	ENG	Query: 3' aagtTTTGTAC-TTAACGACGAc 5'
		|::| | |: |||||||
		Ref: 5' atgtAGGCTGGCAGCTGCTGCTc 3'
miR-424-5p	ENG	Query: 3' aagttttgtactTAACGACGAc 5'
		| |||||||
		Ref: 5' gcaggtggctccAGTGCTGCTg 3'
miR-424-5p	FOXN2	Query: 3' aaGTTTTGTACTTAACGACGAc 5'
		| ||| || ||||||||
		Ref: 5' agCTAAAAAT--TTTGCTGCTg 3'
miR-424-5p	LAMP2	Query: 3' aagtTTTGTACTTAACGACGAc 5'
		||::|| ||||||||
		Ref: 5' catcAAGTATTTCTTGCTGCTt 3'
miR-424-5p	MEOX2	Query: 3' aagttttGTACTTAACGACGAc 5'
		:|| || |||||||
		Ref: 5' cattttcTATCAACTGCTGCTa 3'
miR-424-5p	MAFF	Query: 3' aagTTTTGTACTTA---ACGACGAc 5'
		||: || |: | |||||||
		Ref: 5' taaAAGCCACGGCTTCCTGCTGCTg 3'
miR-424-5p	MYOD1	Query: 3' aaGTTTTGTACTTAACGACGAc 5'
		|::|: : | : |||||||
		Ref: 5' aaCGGAGGGCGCGCTGCTGCTt 3'
miR-432-5p	COPS2	Query: 3' tgggttACTGGATGAGGTTCt 5'
		| ||| |||||||
		Ref: 5' taacccTTACC--CTCCAAGc 3'
miR-432-5p	MEF2D	Query: 3' tgggttactGGATGAGGTTCt 5'
		::| |||||||
		Ref: 5' ctgcctcccTTTCCTCCAAGg 3'
miR-432-5p	MYOD1	Query: 3' tggGTTACTGGATGAGGTTCt 5'
		||| || |:|||||||
		Ref: 5' agaCAAGGA--TGCTCCAAGc 3'
miR-450a	MTM1	Query: 3' tatAATC--CTTGT-GTAGCGTTTt 5'
		|||| |||:: : |||||||
		Ref: 5' tgcTTAGGTGAATGTTTTCGCAAAt 3'
miR-450b-5p	CFL2	Query: 3' atAAGTCCTTGTATAACGTTTt 5'
		| | |:|||| |||||||
		Ref: 5' ttTCCTTGGACATTTTGCAAAa 3'
miR-450b-5p	CFL2	Query: 3' atAAGTCCTTGTATAACGTTTt 5'
		||:| : :| |||||||
		Ref: 5' atTTTACTGCTAGCTTGCAAAa 3'
miR-450b-5p	COPS2	Query: 3' ataAGTCCTTGTATAACGTTTt 5'
		|: | :||| |||||||
		Ref: 5' acgTTTGCTGCATTTTGCAAAa 3'
miR-450b-5p	ENG	Query: 3' atAAGTCCTTGTATAACGTTTt 5'
		||||| |: |||||||||
		Ref: 5' gtTTCAG--AT-TATTGCAAAg 3'
miR-450b-5p	ITGA8	Query: 3' ataagtccTTGTAT---AACGTTTt 5'
		||: || |||||||
		Ref: 5' gtctgcttAATTTAGCTTTGCAAAa 3'
miR-450b-5p	MEOX2	Query: 3' ataAGTCCTTGTATAACGTTTt 5'
		|:|| | | :|||||||
		Ref: 5' gtaTTAG--AGAGGTTGCAAAa 3'
miR-450b-5p	MSTN	Query: 3' ataagtccttgtaTAACGTTTt 5'
		||||||||
		Ref: 5' ctaggtcctaggaATTGCAAAg 3'
miR-450b-5p	RB1	Query: 3' atAAGTCC--TTGTAT--AACGTTTt 5'
		||:: | :|| || |||||||
		Ref: 5' atTTTGTGCTGACTTAAGTTGCAAAc 3'
miR-450c-5p	MTM1	Query: 3' catAATC--CTTGT-GTAGCGTTTt 5'
		|||| |||:: : |||||||
		Ref: 5' tgcTTAGGTGAATGTTTTCGCAAAt 3'
miR-451	ITGA8	Query: 3' ttgagTCATTACCATTGCCAAa 5'
		| || | |||||||
		Ref: 5' ggacaAATACACGAAACGGTTc 3'
miR-455-5p	ITGA8	Query: 3' gcTACATCA--GGTTTCCGTGTAt 5'
		|| |||| :: ::|||||||
		Ref: 5' caATTTAGTAATTTGGGGCACATa 3'
miR-455-5p	MEF2D	Query: 3' gctACATCAGGTTTCCGTGTAt 5'
		|||:| ||| :|||||||
		Ref: 5' ttcTGTGG-CCATGGGCACATg 3'
miR-455-5p	MEF2D	Query: 3' gctaCATCA-GGTTTCCGTGTAt 5'
		| :|| : :::|||||||
		Ref: 5' gagaGGGGTGTGGGGGGCACATa 3'
miR-455-5p	MSTN	Query: 3' gctacatCAGGTTTCCGTGTAt 5'
		| |:| :|||||||
		Ref: 5' ccagtctGCCTATGGGCACATc 3'
miR-455-5p	MSTN	Query: 3' gctacatcagGTTTCCGTGTAt 5'
		:| ||||||||
		Ref: 5' cacttaatgaTACAGGCACATt 3'
miR-486	ATF3	Query: 3' gagcccCGTCGAGTCATGTCCt 5'
		|| |:|| |||||||
		Ref: 5' aaatatGCTGTTCTGTACAGGa 3'
miR-486	MYOD1	Query: 3' gagccccgtcGAGTCATGTCCt 5'
		:|| |||||||
		Ref: 5' ctcctttttaTTCCGTACAGGg 3'
miR-487b	MEF2D	Query: 3' gcttGTC-CTGTCCC--TATTGGTg 5'
		||| | |||| |||||||
		Ref: 5' ccccCAGATAGAGGGAAATAACCAa 3'
miR-493-3p	ENG	Query: 3' ggaCCGTGTGT-CAT--CTGGAAGt 5'
		| |:| || ||| |||||||
		Ref: 5' gggGCCGCCCAGGTAGGGACCTTCt 3'
miR-493-3p	IGF1	Query: 3' ggaccgtgtgtCATCTGGAAGt 5'
		| ||||||||
		Ref: 5' -----------GAAGACCTTCc 3'
miR-493-3p	MEF2D	Query: 3' ggACCGTG---TGTCAT-CTGGAAGt 5'
		|||| : || || |||||||
		Ref: 5' ccTGGCTTCTAACTCTATGACCTTCc 3'
miR-493-5p	CALCRL	Query: 3' ttACTTT-CGGATGGTACATGTt 5'
		| ||| |: |||||||||
		Ref: 5' atTCAAATGTAATCCATGTACAt 3'
miR-493-5p	CALCRL	Query: 3' ttactttcggatggTACATGTt 5'
		|||||||
		Ref: 5' ccagatatgggaaaATGTACAg 3'
miR-493-5p	DLG1	Query: 3' ttactttcGGATGGTACATGTt 5'
		|| |: |||||||
		Ref: 5' gcaccatcCCAATGATGTACAa 3'
miR-493-5p	ITGA8	Query: 3' ttactTTCGGATGGTACATGTt 5'
		|| : |::||||||||
		Ref: 5' tctccAATTGTGTCATGTACAc 3'
miR-493-5p	MTM1	Query: 3' ttACTTTCGGATGGTACATGTt 5'
		| ||||||| |||||||
		Ref: 5' aaTAAAAGCCTCAGATGTACAt 3'
miR-504	LAMP2	Query: 3' tctaTC-TCACGTCTGGTCCCAGa 5'
		|| ||| : || |||||||
		Ref: 5' tgccAGTAGTTTTGAACAGGGTCt 3'
miR-504	MAFF	Query: 3' tcTATCTCACGTCTGGTCCCAGa 5'
		:| |:||| ||::|||||||
		Ref: 5' agGTTGGGTG-AGGTCAGGGTCt 3'
miR-504	MYOD1	Query: 3' tctatctcacGTCTGGTCCCAGa 5'
		:|| ||||||||
		Ref: 5' gctgttgaaaTAG-CCAGGGTCc 3'
miR-504	MYOD1	Query: 3' tctatctcACGTCTGGTCCCAGa 5'
		| | | |||||||
		Ref: 5' cctttttaTTCCGTACAGGGTCa 3'
miR-532-5p	COPS2	Query: 3' tgCCAGGATGTGAGTTCCGTAc 5'
		|| |:|| | ||||||||
		Ref: 5' atGGACTTA-AAACAAGGCATg 3'
miR-532-5p	TIPARP	Query: 3' tgccaggaTGTGA-GTTCCGTAc 5'
		::||| |||||||
		Ref: 5' cataaaacGTACTGAAAGGCATt 3'
miR-542-3p	COPS2	Query: 3' aaaGTCAATAGTTAGACAGTGt 5'
		:|| |: || |||||||
		Ref: 5' ttaTAG-TGGCATACTGTCACt 3'
miR-542-3p	ENG	Query: 3' aaaGTCAATAGT-TAGACAGTGt 5'
		||| | || : |||||||
		Ref: 5' cccCAGGGACCATGCCTGTCACc 3'
miR-542-3p	ENG	Query: 3' aaagtcaatagttaGACAGTGt 5'
		|||||||
		Ref: 5' ttcaaaagcccccaCTGTCACc 3'
miR-542-3p	PFKM	Query: 3' aaagtcaatAGTTAGACAGTGt 5'
		|: |||||||||
		Ref: 5' tacccctgcTTCATCTGTCACa 3'
miR-7134-3p	MEOX2	Query: 3' ggCATAGGCGTCCAAGGCGTa 5'
		|| |:| : ||||||||
		Ref: 5' ccGTTTTCATTTGTTCCGCAt 3'
miR-7134-3p	MTM1	Query: 3' ggCATAGGCGTCCAAGGCGTa 5'
		| | || | |||||||
		Ref: 5' atGAAAACGGATTTTCCGCAg 3'
miR-7142-3p	MTM1	Query: 3' agtgaagTCTCCTCGGTTGTTt 5'
		| | | |||||||
		Ref: 5' aaaaaaaAAAAAAACCAACAAc 3'
miR-7142-3p	MYOD1	Query: 3' agtgaaGTC-TCCT--CGGTTGTTt 5'
		||| |||| |||||||
		Ref: 5' gagccaCAGCAGGAACTCCAACAAt 3'
miR-758	ANKRD2	Query: 3' caaTC-ACCTGGTCCAGTGTTt 5'
		|| |||| :||||||||
		Ref: 5' tacAGCTGGA--GGGTCACAAg 3'
miR-758	DLG1	Query: 3' caatcACCTGGTCCAGTGTTt 5'
		|| |::| |||||||
		Ref: 5' gcatcTGTATTATGTCACAAt 3'
miR-758	MYOD1	Query: 3' caatcACCTGGTCCAGTGTTt 5'
		||| ||||||||||
		Ref: 5' agcttTGGTGCAGGTCACAAc 3'
miR-758	TIPARP	Query: 3' caaTCACCTGGTCCAGTGTTt 5'
		||| ||:| |||||||
		Ref: 5' agaAGTCAACTAAGTCACAAg 3'
miR-885-3p	ATF3	Query: 3' taGGTGATGTGGGGCGACGGa 5'
		||| | : |:||||||||
		Ref: 5' ggCCA-TCTCCTCCGCTGCCg 3'
miR-885-3p	ENG	Query: 3' tagGTGATG-TGGGGCGACGGa 5'
		:|| |: :||||||||||
		Ref: 5' gagTACGATGGCCCCGCTGCCt 3'
miR-885-3p	MEF2D	Query: 3' taggTGATGTGGGGCGACGGa 5'
		||| :||||||||||
		Ref: 5' agggACT--GCCCCGCTGCCc 3'
miR-885-5p	COPS2	Query: 3' tcTCCGTCCCATCACATTACCt 5'
		|||: | || |||||||
		Ref: 5' caAGGT-GACTACCGTAATGGa 3'
miR-885-5p	COPS2	Query: 3' tcTCCGTCCCATCACATTACCt 5'
		|| :| ||| |||||||
		Ref: 5' agAGTTAAATTAG-GTAATGGc 3'
miR-885-5p	MSTN	Query: 3' tctccgtccCATCACATTACCt 5'
		||| |||||||
		Ref: 5' aagcattcaGTAAAGTAATGGt 3'
miR-9	FOXN2	Query: 3' gtATGTC-GAT-CTATTGGTTTCt 5'
		|| || :|| | |||||||
		Ref: 5' taTAAAGTTTATTTTTACCAAAGa 3'
miR-9	MSTN	Query: 3' gtATGT-CGATCT---AT-TGGTTTCt 5'
		| || | |||| |: |||||||
		Ref: 5' atTTCAGGGTAGAATCTGTACCAAAGg 3'
miR-9-1	FOXN2	Query: 3' agTATGTC-GAT-CTATTGGTTTCt 5'
		||| || :|| | |||||||
		Ref: 5' ttATAAAGTTTATTTTTACCAAAGa 3'
miR-9-1	MSTN	Query: 3' agtATGT-CGATCT---AT-TGGTTTCt 5'
		| || | |||| |: |||||||
		Ref: 5' catTTCAGGGTAGAATCTGTACCAAAGg 3'
miR-9-2	FOXN2	Query: 3' agTATGTC-GAT-CTATTGGTTTCt 5'
		||| || :|| | |||||||
		Ref: 5' ttATAAAGTTTATTTTTACCAAAGa 3'
miR-9-2	MSTN	Query: 3' agtATGT-CGATCT---AT-TGGTTTCt 5'
		| || | |||| |: |||||||
		Ref: 5' catTTCAGGGTAGAATCTGTACCAAAGg 3'
miR-92a	ATF3	Query: 3' tgtccGGCCCTGT-TCACGTTAt 5'
		:|| || : |||||||
		Ref: 5' gcatcTCGTGAAGTCGTGCAATg 3'
miR-92a	FOXN2	Query: 3' tgtccggccctgttCACGTTAt 5'
		|||||||
		Ref: 5' tttaaaatttatttGTGCAATa 3'
miR-92a	ITGA8	Query: 3' tgtccggccctGTTCACGTTAt 5'
		:| |||||||
		Ref: 5' aattttatattTATGTGCAATa 3'
miR-92a	MEF2D	Query: 3' tgtccggcccTGT-TCACGTTAt 5'
		|:| ||||||||
		Ref: 5' tctctaagatATACAGTGCAATa 3'
miR-92a	MEF2D	Query: 3' tgtccgGCCCTGT-TCACGTTAt 5'
		| | || :|||||||
		Ref: 5' cccctgCAGTTCACGGTGCAATa 3'
miR-935	COPS2	Query: 3' cgccatcgCCTTC--GC--CATTGACc 5'
		||||| :| |||||||
		Ref: 5' gttcagaaGGAAGACTGTTGTAACTGa 3'
miR-935	MAFF	Query: 3' cgccatcgccttcgcCATTGACc 5'
		|||||||
		Ref: 5' gccacccctcattttGTAACTGc 3'
miR-935	PLAGL1	Query: 3' cgccatcgccttcgcCATTGACc 5'
		|||||||
		Ref: 5' gtaacgttttacaatGTAACTGt 3'
miR-935	TIPARP	Query: 3' cgcCATCGCCTTCGCCATTGACc 5'
		| ||: | | | |||||||
		Ref: 5' aaaGAAGT-GCATCTGTAACTGa 3'

## Sheet: D
Predicted target analysis of DE miRNAs with DE circRNAs between LW1D and LW90D samples
Query	Ref	Binding
circANKRD2	miR-1	Query: 3' atgtatgaagaaaTGTAAGGt 5'
		|||||||
		Ref: 5' tgtggacgaggagACATTCCt 3'
circNCBP3	miR-1	Query: 3' atgtatgaagaaaTGTAAGGt 5'
		|||||||
		Ref: 5' cctataaacaccgACATTCCg 3'
circTBC1D22A	miR-1	Query: 3' atgTATGAAGAAATGTAAGGt 5'
		|| | | |||||||
		Ref: 5' cagATCCACATAGACATTCCc 3'
circ4082	miR-122	Query: 3' tgtTTGTGGTAACAGTGTGAGGt 5'
		||| : | | |||||||
		Ref: 5' ttcAACCTGAAATTGACACTCCt 3'
circZNF292	miR-122	Query: 3' tgtttgtggtaacagTGTGAGGt 5'
		|||||||
		Ref: 5' ---------------ACACTCCt 3'
circ0470	miR-125b	Query: 3' agtgttcAATCCCAGAGTCCCt 5'
		| || ||||||||
		Ref: 5' agggtgaTCAGATTCTCAGGGt 3'
circEZH1	miR-125b	Query: 3' agtgttcaaTCCCAGAGTCCCt 5'
		|| | |||||||
		Ref: 5' ctcgctccaAGTG-CTCAGGGc 3'
circATE1	miR-127	Query: 3' tcggttcGAGTCTG--CCTAGGCt 5'
		| :| || |||||||
		Ref: 5' aaatggcCATACACCAGGATCCGc 3'
circMYBPC2	miR-127	Query: 3' tcGGTTCGAGTCTGCCTAGGCt 5'
		||||| || :|||||||
		Ref: 5' caCCAAG--AAGCTGGATCCGg 3'
circ4082	miR-1285	Query: 3' tgcCCCAGAGCGATACAACGGGTc 5'
		|| |:|||| |||||||
		Ref: 5' agaGGAAATTGCTA--TTGCCCAa 3'
circNR1H3	miR-1285	Query: 3' tgcccCAGAGCGATAC--AACGGGTc 5'
		||| || | | |||||||
		Ref: 5' ggcccGTC-AGCAACGCTTTGCCCAc 3'
circ4082	miR-130a	Query: 3' tacgggaaaaTTGTAACGTGAc 5'
		:|: |||||||
		Ref: 5' gtcgtcagcaGATCTTGCACTc 3'
circKANSL1L_4	miR-130a	Query: 3' tacgggaaaattGTAACGTGAc 5'
		:||||||||
		Ref: 5' ttaaaaaggcttTATTGCACTg 3'
circKANSL1L_4	miR-130a	Query: 3' tacgggaaaaTTGT-AACGTGAc 5'
		|| | |||||||
		Ref: 5' cagaaatccaAAGATTTGCACTg 3'
circ3514	miR-1343	Query: 3' cgcTC-TCACGCCCG-GGGTCCTc 5'
		|| || | ||| |||||||
		Ref: 5' gtcAGCAGCTCAGGCACCCAGGAa 3'
circANKRD2	miR-1343	Query: 3' cgctctcacGCCCGGGGTCCTc 5'
		|| :|||||||
		Ref: 5' ggccttggcCGCCTCCCAGGAg 3'
circGRIPAP1	miR-1343	Query: 3' cgCTCTCACGCC--CGGGGTCCTc 5'
		|| :| || | | |||||||
		Ref: 5' gaGAAGGAGCAGTTGACCCAGGAa 3'
circZNF292	miR-1343	Query: 3' cgctctcacgcccGGGGTCCTc 5'
		:|||||||
		Ref: 5' gtgcactattcttTCCCAGGAa 3'
circ4082	miR-136	Query: 3' aggtagtagttttgTTTACCTCa 5'
		:|||||||
		Ref: 5' agcaaggtttctcaGAATGGAGa 3'
circKIAA2026	miR-136	Query: 3' agGTAGTAGTTTTGTTTACCTCa 5'
		|||:: :: || |||||||
		Ref: 5' taCATTGGTGCAAGTAATGGAGa 3'
circSAV1	miR-136	Query: 3' aggtagtagttttgTTTACCTCa 5'
		||||||||
		Ref: 5' aattttgctgttgaAAATGGAGa 3'
circTRMT11	miR-136	Query: 3' aggtagtagTTTTG---TTTACCTCa 5'
		||||| ||||||||
		Ref: 5' ctagtaggaAAAACCAGAAATGGAGa 3'
circUSP33	miR-136	Query: 3' aggtagtagttTTGTTTACCTCa 5'
		:| :|||||||
		Ref: 5' --------gttGAGGAATGGAGt 3'
circPLCE1(3)	miR-136	Query: 3' agGTAGTAGTTTTG---TTTACCTCa 5'
		|||: |:| | :|||||||
		Ref: 5' tcCATTCTTACCTCCCAGAATGGAGa 3'
circKANSL1L_5	miR-142-3p	Query: 3' ggtatTTCATC-CTTTGTGATGt 5'
		|||||| |||||||
		Ref: 5' tcaccAAGTAGCCCTACACTACt 3'
circKANSL1L_5	miR-142-3p	Query: 3' ggtatttcatccTTTGTGATGt 5'
		|||||||||
		Ref: 5' agcagcttcattAAACACTACa 3'
circTRMT11	miR-142-5p	Query: 3' tcatcacgaaagaTGAAATAc 5'
		|||||||
		Ref: 5' gtcaaaaagagacACTTTATt 3'
circTRMT11	miR-146a-5p	Query: 3' ttGGGTACCT---TAAGTCAAGAGt 5'
		|| : ||| :| ||||||||
		Ref: 5' ctCCAGAGGAGCTGTACAGTTCTCt 3'
circMYBPC2_3	miR-187	Query: 3' ggccgacgTTGTG--TTCTGTGCt 5'
		||||: ||||||||
		Ref: 5' agatcgagAACATGAAAGACACGg 3'
circ0470	miR-199b-5p	Query: 3' ttGTCTATCAGATT----TGTGACCc 5'
		|| | : |:|:| |||||||
		Ref: 5' gcCACAAGTTTTGATGTTACACTGGc 3'
circEZH1	miR-199b-5p	Query: 3' ttgTCTATCA--G-ATTTGTGACCc 5'
		:|| ||| | ::|||||||
		Ref: 5' aggGGACAGTGACAGGGACACTGGc 3'
circPARD3	miR-199b-5p	Query: 3' ttgtctatcagatTTGTGACCc 5'
		:|||||||
		Ref: 5' cgtgggacacgccGACACTGGt 3'
circKANSL1L_4	miR-19a	Query: 3' agTCAAAACGTATCTAAACGTGt 5'
		|| | || ||||||||||
		Ref: 5' gcAGAAATCCAAAGATTTGCACt 3'
circKANSL1L_4	miR-19a	Query: 3' agtcaaaacgTATCTAAACGTGt 5'
		||:| |||||||
		Ref: 5' gataccaaaaATGGCTTTGCACg 3'
circKANSL1L_4	miR-19b	Query: 3' agtcaaaacgTACCTAAACGTGt 5'
		|||| |||||||
		Ref: 5' gataccaaaaATGGCTTTGCACg 3'
circKANSL1L_4	miR-19b	Query: 3' agTCAAAACGTACCTAAACGTGt 5'
		|| | || |||||||||
		Ref: 5' gcAGAAATCCAAAGATTTGCACt 3'
circ0470	miR-214	Query: 3' gacggacagacacGGACGACa 5'
		|||||||
		Ref: 5' tcttgaagacagcCCTGCTGc 3'
circMSH3	miR-214	Query: 3' gacggacagacACGGACGACa 5'
		| |||||||
		Ref: 5' ccaagcattaaTACCTGCTGt 3'
circATF7IP	miR-214	Query: 3' gacggaCAGACACGGACGACa 5'
		| :|| |||||||
		Ref: 5' ggaaaaGCTTGCACCTGCTGa 3'
circEZH1	miR-218	Query: 3' tgtaccaaTCTAGTTCGTGTt 5'
		||| |||||||
		Ref: 5' gaagaagaAGAGAAAGCACAg 3'
circKIAA2026	miR-218	Query: 3' tgtaccaaTCTAGTTCGTGTt 5'
		| | |||||||
		Ref: 5' agcaaaacACAAGAAGCACAa 3'
circMSH3	miR-218	Query: 3' tgtaCCAATCT-AG--TTCGTGTt 5'
		||||| | |: |||||||
		Ref: 5' attgGGTTAAAGTTGGAAGCACAa 3'
circST7L(6-11)	miR-218	Query: 3' tgtaccaaTCTAGTTCGTGTt 5'
		:|:|:|||||||
		Ref: 5' ccagaagaGGGTTAAGCACAg 3'
circEZH1	miR-218-5p	Query: 3' tgtaccaaTCTAGTTCGTGTt 5'
		||| |||||||
		Ref: 5' gaagaagaAGAGAAAGCACAg 3'
circKIAA2026	miR-218-5p	Query: 3' tgtaccaaTCTAGTTCGTGTt 5'
		| | |||||||
		Ref: 5' agcaaaacACAAGAAGCACAa 3'
circMSH3	miR-218-5p	Query: 3' tgtaCCAATCT-AG--TTCGTGTt 5'
		||||| | |: |||||||
		Ref: 5' attgGGTTAAAGTTGGAAGCACAa 3'
circST7L(6-11)	miR-218-5p	Query: 3' tgtaccaaTCTAGTTCGTGTt 5'
		:|:|:|||||||
		Ref: 5' ccagaagaGGGTTAAGCACAg 3'
circEZH1	miR-218b	Query: 3' gtgtaccaaTCTAGTTCGTGTt 5'
		||| |||||||
		Ref: 5' agaagaagaAGAGAAAGCACAg 3'
circKIAA2026	miR-218b	Query: 3' gtgtaccaaTCTAGTTCGTGTt 5'
		| | |||||||
		Ref: 5' aagcaaaacACAAGAAGCACAa 3'
circMSH3	miR-218b	Query: 3' gtgtaCCAATCT-AG--TTCGTGTt 5'
		||||| | |: |||||||
		Ref: 5' gattgGGTTAAAGTTGGAAGCACAa 3'
circST7L(6-11)	miR-218b	Query: 3' gtgtaccaaTCTAGTTCGTGTt 5'
		:|:|:|||||||
		Ref: 5' tccagaagaGGGTTAAGCACAg 3'
circ4082	miR-22-3p	Query: 3' tgtcAAGAAGTTG-ACCGTCGAa 5'
		| | ||:| |||||||
		Ref: 5' ttccTGCGACAGCAAGGCAGCTa 3'
circPFKFB1	miR-22-3p	Query: 3' tgtcaagaagttGACCGTCGAa 5'
		|||||||||
		Ref: 5' aagcagtgtgccCTGGCAGCTc 3'
circZCCHC6	miR-22-3p	Query: 3' tgtcAAGAAGTTGACCGTCGAa 5'
		| | || | |||||||
		Ref: 5' gtgaTGCATCTAGAGGCAGCTt 3'
circZCCHC6	miR-22-3p	Query: 3' tgtcaagaAGTTGA-CCGTCGAa 5'
		|| ::| |||||||
		Ref: 5' atacagaaTCTGTTGGGCAGCTg 3'
circZNF292	miR-22-3p	Query: 3' tgtcaagaagTTGACCGTCGAa 5'
		:| ||||||||
		Ref: 5' agctgatggaGAATGGCAGCTg 3'
circ4082	miR-22-5p	Query: 3' attTCGAACGGTGACTTCTTGa 5'
		|| |||||| |||||||
		Ref: 5' tacAG-TTGCCAAGGAAGAACt 3'
circ4082	miR-22-5p	Query: 3' attTCGAACGGTGACTTCTTGa 5'
		|| | ||| ||||||||
		Ref: 5' gccAGATCACCA-TGAAGAACt 3'
circKIAA2026	miR-22-5p	Query: 3' atTTC-GAACGGTG-ACTTCTTGa 5'
		||| :||| || |||||||
		Ref: 5' tcAAGTTTTGAGACAGGAAGAACa 3'
circNR1H3	miR-22-5p	Query: 3' atttcGAACGGTGACTTCTTGa 5'
		| ||:|| |||||||
		Ref: 5' -gtgtCCTGTCA--GAAGAACa 3'
circPREPL	miR-22-5p	Query: 3' atTTC-GAAC--GGTGA--CTTCTTGa 5'
		||| :||| | |:| |||||||
		Ref: 5' tgAAGTTTTGTTCAATTTGGAAGAACt 3'
circPUM2	miR-22-5p	Query: 3' atTTCGAACGG-T-GA--CTTCTTGa 5'
		:| ||| || | || |||||||
		Ref: 5' caGACCTTACCTATCTTAGAAGAACt 3'
circTRMT11	miR-22-5p	Query: 3' atTTCGAACGGTG-ACTTCTTGa 5'
		:|| | |:|| |||||||
		Ref: 5' taGAGAAT-CTACAAGAAGAACa 3'
circATF7IP	miR-22-5p	Query: 3' atTTCGAACGGTGACTTCTTGa 5'
		| | || :|: |||||||
		Ref: 5' aaATGGATGGTATAGAAGAACc 3'
circATF7IP	miR-22-5p	Query: 3' atttcgaaCGGTGACTTCTTGa 5'
		|:|| |||||||
		Ref: 5' tgtacaagGTCAAAGAAGAACt 3'
circATF7IP	miR-22-5p	Query: 3' atTTCGAACGGTGACTTCTTGa 5'
		|||| || : |||||||
		Ref: 5' caAAGC-TGAGGAAGAAGAACg 3'
circANKRD2	miR-24-3p	Query: 3' gacaaggacgacttGACTCGGt 5'
		|||||||
		Ref: 5' ccaggagccgcctcCTGAGCCg 3'
circ4082	miR-296-3p	Query: 3' ccTTTCGGAGGCGGGTTGGGa 5'
		|:|| ||:: ||||||||
		Ref: 5' aaAGAGGCTTT-CCCAACCCc 3'
circKANSL1L_4	miR-299	Query: 3' catacaccCTGCCATTTGGTa 5'
		|| |||||||
		Ref: 5' aatgcactGAAATTAAACCAg 3'
circATF7IP	miR-299	Query: 3' catacaCCCTGCCATTTGGTa 5'
		| ||: |||||||
		Ref: 5' ccaaagGAGAT-ATAAACCAg 3'
circ0470	miR-323	Query: 3' tctccagctggcacATTACACg 5'
		|||||||
		Ref: 5' attctcagggtaaaTAATGTGg 3'
circ0470	miR-335	Query: 3' gtaaaaagcaataaCGAGAACt 5'
		|||||||
		Ref: 5' caatggaaaactggGCTCTTGg 3'
circ4082	miR-335	Query: 3' gtaaaaagcaataaCGAGAACt 5'
		|||||||
		Ref: 5' gctcgagccaaggaGCTCTTGa 3'
circATF7IP	miR-335	Query: 3' gtaaAAAGCAATA-ACGAGAACt 5'
		|| | || ||||||||
		Ref: 5' gccaTTACAGAATCTGCTCTTGg 3'
circEZH1	miR-363	Query: 3' aatgtctacCTATGGCACGTTAa 5'
		|| | |||||||
		Ref: 5' tcgctgtaaGACCCAGTGCAATa 3'
circ4082	miR-370	Query: 3' tggtccaAGGTGGGGTCGTCCg 5'
		|||| :||||||||
		Ref: 5' atgtgacTCCA-TCCAGCAGGc 3'
circ4082	miR-370	Query: 3' tggtCCAAGGTGGGGTCGTCCg 5'
		||||| | |||||||
		Ref: 5' ctgcGGTTCAA---CAGCAGGa 3'
circ4082	miR-370	Query: 3' tggtccaaggtgggGTCGTCCg 5'
		|||||||
		Ref: 5' gaaagctgaatgagCAGCAGGa 3'
circCHD7	miR-370	Query: 3' tggtccaagGTGGGGTCGTCCg 5'
		|:|:||||||||
		Ref: 5' cagaagagaCGCTCCAGCAGGc 3'
circCHD7	miR-370	Query: 3' tgGTCCAAGGTGGGGTCGTCCg 5'
		||| |||: |||||||
		Ref: 5' cgCAG--TCCG-AGCAGCAGGa 3'
circMEF2C	miR-370	Query: 3' tggtcCAAGGTGG--GGTCGTCCg 5'
		| ||:| : :|||||||
		Ref: 5' atcttGATCTAATGATCAGCAGGc 3'
circKANSL1L_4	miR-376a-3p	Query: 3' tgcACCTAAAAGGAGATACTa 5'
		|| | ||| |||||||
		Ref: 5' aaaTGAAATTT--TCTATGAa 3'
circEZH1	miR-382	Query: 3' gctTAGGTGGTGCTTGTTGAa 5'
		| |:||: | |||||||
		Ref: 5' ggcACCTACTTC-AACAACTt 3'
circFAM188A_2	miR-382	Query: 3' gcttaggtggtgcTTGTTGAa 5'
		|||||||
		Ref: 5' ggttaagaggaaaAACAACTg 3'
circGRIPAP1	miR-382	Query: 3' gcTTAGGTGGTG--CTTGTTGAa 5'
		|:|| :|::| ||||||||
		Ref: 5' acAGTCGGCTGCTGGAACAACTt 3'
circKANSL1L_5	miR-382	Query: 3' gcTTAGGTGGT-GCTTGTTGAa 5'
		|:| :| | | |||||||
		Ref: 5' agAGTATAAAATCCAACAACTa 3'
circATF7IP	miR-382	Query: 3' gcTTAGGTGGTGCTTGTTGAa 5'
		:| : |:|:: |||||||
		Ref: 5' gtGAGTGATCGTCAACAACTt 3'
circST7L(6-11)	miR-382	Query: 3' gcttaggtggtgcTTGTTGAa 5'
		|||||||
		Ref: 5' ctgaggaagaagcAACAACTa 3'
circ0470	miR-411	Query: 3' caatcacctggcACAATGTa 5'
		|||||||
		Ref: 5' cacaagttttgaTGTTACAc 3'
circCHD7	miR-421-3p	Query: 3' cgCGGGTTAAT--TAC--AGACAACTa 5'
		|:||:| | | | ||||||||
		Ref: 5' caGTCCGAGCAGCAGGAATCTGTTGAc 3'
circKIAA2026	miR-421-3p	Query: 3' cgcgggtTAAT-TACAGACAACTa 5'
		|| | || ||||||||
		Ref: 5' gataatcATGACATCTCTGTTGAa 3'
circSAV1	miR-421-3p	Query: 3' cgcgggTTAATTACA--GACAACTa 5'
		|:||||| | |||||||
		Ref: 5' aacagaAGTTAATTTTGCTGTTGAa 3'
circZNF292	miR-421-3p	Query: 3' cgcgggttaattACAGACAACTa 5'
		|| |||||||
		Ref: 5' ttttactgtgtcTGCCTGTTGAa 3'
circATF7IP	miR-421-3p	Query: 3' cgCGGGTTAATTACAGACAACTa 5'
		| :||| || |||||||
		Ref: 5' aaGGTCAAAGAAGAACTGTTGAa 3'
circATF7IP	miR-421-3p	Query: 3' cgcggGTTAA-TTACAGACAACTa 5'
		::||| |: ||||||||
		Ref: 5' cctggTGATTCAGATTCTGTTGAc 3'
circATF7IP	miR-421-3p	Query: 3' cgcGGGTTAATTA---C--AGACAACTa 5'
		|:| :||:|| | ||||||||
		Ref: 5' cacCTCTGTTGATCCCGCCTCTGTTGAt 3'
circFAM179B	miR-424-3p	Query: 3' tatcgtcgcggaGTGCAAAAc 5'
		:|||||||
		Ref: 5' ggaaaatagagaTACGTTTTc 3'
circPREPL	miR-424-3p	Query: 3' tatcgtcgcggagTGCAAAAc 5'
		|||||||
		Ref: 5' acaaacgtaatgaACGTTTTt 3'
circEZH1	miR-432-5p	Query: 3' tgGGTTACTGGA-TGAGGTTCt 5'
		||| ||| :|||||||
		Ref: 5' ctCCACAACCCTCGCTCCAAGt 3'
circKANSL1L_5	miR-432-5p	Query: 3' tggGTTACTGGAT-GAGGTTCt 5'
		||: | |: |||||||
		Ref: 5' aggCAGATTCGTGCCTCCAAGg 3'
circMEF2C	miR-432-5p	Query: 3' tgggttacTGGAT-GAGGTTCt 5'
		|:| | |||||||
		Ref: 5' tgtaacacATCGACCTCCAAGt 3'
circMEF2C	miR-486	Query: 3' gagccccgtcgagTCATGTCCt 5'
		||||||||
		Ref: 5' gagtctgaggacaAGTACAGGa 3'
circPUM2	miR-486	Query: 3' gaGCCCCGTCGAGTCATGTCCt 5'
		| | |||| |:||||||||
		Ref: 5' taCAGAGCAG-TTAGTACAGGa 3'
circATF7IP	miR-486	Query: 3' gagccCCGTCGA--GTCATGTCCt 5'
		||| |:| :|||||||
		Ref: 5' gatctGGCTGTTGGAGGTACAGGc 3'
circKANSL1L_4	miR-487b	Query: 3' gcttgtCCT--GTCCCTATTGGTg 5'
		||| || |||||||
		Ref: 5' tattttGGATTCAAATATAACCAa 3'
circMYBPC2	miR-493-3p	Query: 3' ggaccgtgtgtcaTCTGGAAGt 5'
		||||||||
		Ref: 5' agatcagcgacccAGACCTTCc 3'
circATF7IP	miR-493-3p	Query: 3' ggaccgtgTGTCATCTGGAAGt 5'
		|:: ||||||||
		Ref: 5' acatgaggATGAAAGACCTTCt 3'
circKANSL1L_4	miR-493-5p	Query: 3' ttACTTTCGGATGG--TACATGTt 5'
		| |: || |: | |||||||
		Ref: 5' agTCAGTGCATGACAGATGTACAa 3'
circKIAA2026	miR-493-5p	Query: 3' ttACTTTCGGATG-GTACATGTt 5'
		| ::|| |:| :|||||||
		Ref: 5' atTTGGAGAATGCTTATGTACAc 3'
circFAM179B	miR-504	Query: 3' tctatctcacgtctgGTCCCAGa 5'
		|||||||
		Ref: 5' ---------gatttaCAGGGTCa 3'
circTRMT11	miR-504	Query: 3' tctatctcaCGTCTGGTCCCAGa 5'
		| ||| |||||||
		Ref: 5' aatctacaaGAAGAACAGGGTCa 3'
circST7L(6-11)	miR-532-5p	Query: 3' tgccagGATGTGAGTTCCGTAc 5'
		:||::| |||||||
		Ref: 5' ------TTATGCAGAAGGCATg 3'
circ4082	miR-542-3p	Query: 3' aaagtcaatAGTT-AGACAGTGt 5'
		||:: ||||||||
		Ref: 5' tagagaaatTCGGCTCTGTCACc 3'
circKANSL1L_5	miR-7142-3p	Query: 3' agtgaaGTCTCCTCGGTTGTTt 5'
		:| | | |||||||
		Ref: 5' ctagagTATAAAATCCAACAAc 3'
circMSH3	miR-7142-3p	Query: 3' agTGAAGTCTCCTC---GGTTGTTt 5'
		| |||| || || |||||||
		Ref: 5' gaAATTCA-AGAAGTTACCAACAAg 3'
circKANSL1L_4	miR-885-5p	Query: 3' tctccgtcccatCACATTACCt 5'
		|||||||||
		Ref: 5' gaaaaacttactGTGTAATGGc 3'
circKIAA2026	miR-885-5p	Query: 3' tctccgtcCCAT-CACATTACCt 5'
		|||: |||||||
		Ref: 5' actacattGGTGCAAGTAATGGa 3'
circPREPL	miR-885-5p	Query: 3' tctccgtcccatcACATTACCt 5'
		||||||||
		Ref: 5' ttagtgatcagccTGTAATGGa 3'
circ4082	miR-126-5p	Query: 3' gcgcATGGTT-TTCATTATTAc 5'
		||::|: || |||||||
		Ref: 5' ctacTATTAGTAAATAATAATa 3'
circATF7IP	miR-126-5p	Query: 3' gcgcatggttttcATTATTAc 5'
		|||||||
		Ref: 5' aacctttgtttccTAATAATa 3'
circ0470	miR-129a-5p	Query: 3' cgttcGGGTCTGG-CGTTTTTc 5'
		::|: |:: |||||||
		Ref: 5' tgctaTTCGAATTGGCAAAAAt 3'
circKIAA2026	miR-129a-5p	Query: 3' cgTTCGGGTC---TGGCGTTTTTc 5'
		|:|||| | | :|||||||
		Ref: 5' gcAGGCCCTGTGAAATGCAAAAAg 3'
circKIAA2026	miR-129a-5p	Query: 3' cgttcgggTCTGG-CGTTTTTc 5'
		| |:| |||||||
		Ref: 5' tttatagaAAATCAGCAAAAAt 3'
circKIAA2026	miR-129a-5p	Query: 3' cgttcgggtCTGGCGTTTTTc 5'
		|| |||||||
		Ref: 5' aactaaaatGAGAGCAAAAAa 3'
circPDCD4	miR-129a-5p	Query: 3' cgTTCGGGTCTGGCGTTTTTc 5'
		| ||| || |||||||
		Ref: 5' taATGCCAAG---GCAAAAAg 3'
circPUM2	miR-129a-5p	Query: 3' cgttcGGGTCTGGCGTTTTTc 5'
		::|| || |||||||
		Ref: 5' ----aTTCATACAGCAAAAAc 3'
circ0470	miR-129b	Query: 3' cgttcGGGTCTGG-CGTTTTTc 5'
		::|: |:: |||||||
		Ref: 5' tgctaTTCGAATTGGCAAAAAt 3'
circKIAA2026	miR-129b	Query: 3' cgTTCGGGTC---TGGCGTTTTTc 5'
		|:|||| | | :|||||||
		Ref: 5' gcAGGCCCTGTGAAATGCAAAAAg 3'
circKIAA2026	miR-129b	Query: 3' cgttcgggTCTGG-CGTTTTTc 5'
		| |:| |||||||
		Ref: 5' tttatagaAAATCAGCAAAAAt 3'
circKIAA2026	miR-129b	Query: 3' cgttcgggtCTGGCGTTTTTc 5'
		|| |||||||
		Ref: 5' aactaaaatGAGAGCAAAAAa 3'
circPDCD4	miR-129b	Query: 3' cgTTCGGGTCTGGCGTTTTTc 5'
		| ||| || |||||||
		Ref: 5' taATGCCAAG---GCAAAAAg 3'
circPUM2	miR-129b	Query: 3' cgttcGGGTCTGGCGTTTTTc 5'
		::|| || |||||||
		Ref: 5' ----aTTCATACAGCAAAAAc 3'
circCHD7	miR-1306-5p	Query: 3' acctgcAAACGTCCCCTCCACc 5'
		| || || |||||||
		Ref: 5' aaggaaTCTGGAGAGGAGGTGg 3'
circGRIPAP1	miR-1306-5p	Query: 3' acctgcaaACGTCCCCTCCACc 5'
		|| : |||||||
		Ref: 5' ctccggcaTGAGAAGGAGGTGc 3'
circMYBPC2_3	miR-1306-5p	Query: 3' accTGCAAACGTCCCCTCCACc 5'
		::| | |:: |||||||
		Ref: 5' aatGTGATGGTGAAGGAGGTGt 3'
circPFKFB1	miR-133a-5p	Query: 3' taaACCAAGGTAAAATGGTCGa 5'
		|||| : |||||||||
		Ref: 5' ttaTGGT--GGGTTTACCAGCt 3'
circKANSL1L_4	miR-139-5p	Query: 3' gaCCTCT-GTGCACGTGACATCt 5'
		||| | : | | |||||||
		Ref: 5' atGGAAAGTCCAAGAACTGTAGa 3'
circKANSL1L_5	miR-139-5p	Query: 3' gacctctgtgcacgTGACATCt 5'
		|||||||
		Ref: 5' ------------taACTGTAGt 3'
circPDCD4	miR-139-5p	Query: 3' gaCCTCTGTGCACG-------TGACATCt 5'
		||||| :|||: |||||||
		Ref: 5' caGGAGAATTGTGTTTATGAAACTGTAGt 3'
circPUM2	miR-143-5p	Query: 3' ggtctctacgTCGTGACGTGg 5'
		||||||||||
		Ref: 5' cgcatcctagAGCACTGCACt 3'
circKIAA2026	miR-145-5p	Query: 3' ttcCCTAAGGACCCT--TTTGACCTg 5'
		| :| ||| ||| ||||||||
		Ref: 5' aaaGAGTACCTCGGATTAAACTGGAg 3'
circPFKFB1	miR-145-5p	Query: 3' ttccctaaGGACC--CT-TTTGACCTg 5'
		::||| || :|||||||
		Ref: 5' taccaaccTTTGGATGATGAACTGGAc 3'
circKANSL1L_4	miR-148a-3p	Query: 3' tgTTTCAAGACATCACGTGACt 5'
		|||| || || |||||||
		Ref: 5' aaAAAG-GCTTTATTGCACTGt 3'
circKANSL1L_4	miR-148a-3p	Query: 3' tgTTTCAA--GACATCACGTGACt 5'
		| |||| | | |||||||
		Ref: 5' taACAGTTTACCTAAATGCACTGa 3'
circKANSL1L_4	miR-148a-3p	Query: 3' tgtttcaagacatcACGTGACt 5'
		|||||||
		Ref: 5' gaaatccaaagattTGCACTGt 3'
circPUM2	miR-148a-3p	Query: 3' tgtttcaagaCATCACGTGACt 5'
		| | |||||||
		Ref: 5' gcatcctagaGCACTGCACTGc 3'
circKANSL1L_4	miR-148b-3p	Query: 3' tgTTTCAAGACACTACGTGACt 5'
		|||| || | |||||||
		Ref: 5' aaAAAG-GCTTTATTGCACTGt 3'
circKANSL1L_4	miR-148b-3p	Query: 3' tgTTTCAA--GACACTACGTGACt 5'
		| |||| | ||||||||
		Ref: 5' taACAGTTTACCTAAATGCACTGa 3'
circKANSL1L_4	miR-148b-3p	Query: 3' tgTTTCAAGACACT--ACGTGACt 5'
		:|| | | || |||||||
		Ref: 5' caGAAATCCAAAGATTTGCACTGt 3'
circPUM2	miR-148b-3p	Query: 3' tgtttcaagacactACGTGACt 5'
		|||||||
		Ref: 5' gcatcctagagcacTGCACTGc 3'
circ4082	miR-149	Query: 3' ccCTCACTT-CTGTGC---CTCGGTCt 5'
		|:| ||: ||| :| |||||||
		Ref: 5' atGGGAGAGCGACTTGCTCGAGCCAGc 3'
circEZH1	miR-149	Query: 3' cccTCACTTCTGTGCCTCGGTCt 5'
		| | ||| |: |||||||
		Ref: 5' agaAATCAAG--ATTGAGCCAGa 3'
circATF7IP	miR-149	Query: 3' ccctcacttctgtgcCTCGGTCt 5'
		|||||||
		Ref: 5' gattcagcctctgatGAGCCAGc 3'
circKANSL1L_4	miR-152	Query: 3' ggTTCAAGACAGTACGTGACt 5'
		||| || | |||||||
		Ref: 5' aaAAG-GCTTTATTGCACTGt 3'
circKANSL1L_4	miR-152	Query: 3' ggttcaagacagTACGTGACt 5'
		||||||||
		Ref: 5' cagtttacctaaATGCACTGa 3'
circKANSL1L_4	miR-152	Query: 3' ggttcaagacagtACGTGACt 5'
		|||||||
		Ref: 5' aaatccaaagattTGCACTGt 3'
circPUM2	miR-152	Query: 3' ggttcaagacaGT-ACGTGACt 5'
		|| |||||||
		Ref: 5' gcatcctagagCACTGCACTGc 3'
circATE1	miR-181a	Query: 3' ttgaGTGG--CT-GTCG--CAACTTACAa 5'
		|||| || | || | |||||||
		Ref: 5' cataCACCAGGATCCGCCTGATGAATGTg 3'
circNCBP3	miR-181a	Query: 3' ttgaGTGGCTGT--CGC---A--ACTTACAa 5'
		|||||||| || | |||||||
		Ref: 5' taaaCACCGACATTCCGGACTAGTGAATGTt 3'
circPUM2	miR-181a	Query: 3' ttgaGTGGCTGT-CGCAACTTACAa 5'
		:|| | | || ||||||||
		Ref: 5' gttgTACAAAAATGCATTGAATGTg 3'
circZNF292	miR-181a	Query: 3' ttGAGTGGCTGTCGCAACTTACAa 5'
		||:|:| :| | |||||||
		Ref: 5' acCTTATC-TTACCTCTGAATGTg 3'
circATE1	miR-181b	Query: 3' ttggGTGG--CT-GTCG--TTACTTACAa 5'
		|||| || | || :||||||||
		Ref: 5' cataCACCAGGATCCGCCTGATGAATGTg 3'
circNCBP3	miR-181b	Query: 3' ttgggtGGCTGTCGTTACTTACAa 5'
		|||: | :|:|||||||
		Ref: 5' gacattCCGG-ACTAGTGAATGTt 3'
circPUM2	miR-181b	Query: 3' ttggGTGGCTGT-CGTTACTTACAa 5'
		:|| | | ||| |||||||
		Ref: 5' gttgTACAAAAATGCATTGAATGTg 3'
circZNF292	miR-181b	Query: 3' ttGGGTGGCTGTCGTTACTTACAa 5'
		|::|:| :| | |||||||
		Ref: 5' acCTTATC-TTACCTCTGAATGTg 3'
circATE1	miR-181d-5p	Query: 3' ttgggtGGCTGTTGTTACTTACAa 5'
		||| | ::||||||||
		Ref: 5' caggatCCGCC--TGATGAATGTg 3'
circNCBP3	miR-181d-5p	Query: 3' ttggGTGGCTGT------TG-TTACTTACAa 5'
		|||||||| || |:|||||||
		Ref: 5' taaaCACCGACATTCCGGACTAGTGAATGTt 3'
circPUM2	miR-181d-5p	Query: 3' ttggGTGGCTGT-TGTTACTTACAa 5'
		:|| | | :|| |||||||
		Ref: 5' gttgTACAAAAATGCATTGAATGTg 3'
circZNF292	miR-181d-5p	Query: 3' ttGGGTGGCTGTTGTTACTTACAa 5'
		|::|:| :| | |||||||
		Ref: 5' acCTTATC-TTACCTCTGAATGTg 3'
circ0470	miR-186	Query: 3' ttCGGGTTTTCCTCT-TAAGAAAc 5'
		|:| :| : |:|| |||||||
		Ref: 5' gaGTCGGATGTGGGAGATTCTTTc 3'
circPFKFB1	miR-186	Query: 3' ttcgGGTTTTCCT-CTTAAGAAAc 5'
		| |:|| | |||||||||
		Ref: 5' gctaCAAGAACTACGAATTCTTTc 3'
circZNF292	miR-186	Query: 3' ttcgggttttCCTCTTAAGAAAc 5'
		| | |||||||
		Ref: 5' ccggtactgtGCACTATTCTTTc 3'
circDEK	miR-186	Query: 3' ttcgGGTTTTC----CTCTTAAGAAAc 5'
		||||| | || ||||||||
		Ref: 5' cgaaCCAAATGTCCTGA-AATTCTTTc 3'
circKIAA2026	miR-196b-5p	Query: 3' gggttgttGTCCTTTGATGGAt 5'
		|| | ||||||||
		Ref: 5' aaccttttCATG-AACTACCTt 3'
circUBE3A	miR-196b-5p	Query: 3' ggGTTGTTGTC-CTTTGATGGAt 5'
		| | | ::| | :|||||||
		Ref: 5' agCTAGACTGGTGTGACTACCTg 3'
circ0470	miR-199a-5p	Query: 3' ctTGTCCATCAGACT----TGTGACCc 5'
		||| || |:||| |||||||
		Ref: 5' ccACAAGT--TTTGATGTTACACTGGc 3'
circEZH1	miR-199a-5p	Query: 3' ctTGTCCATCAGACTTGTGACCc 5'
		||| ||: |:|||||||
		Ref: 5' ggACA-GTGACAGGGACACTGGc 3'
circPARD3	miR-199a-5p	Query: 3' cttgtccatcagacTTGTGACCc 5'
		:|||||||
		Ref: 5' ccgtgggacacgccGACACTGGt 3'
circ4082	miR-23a	Query: 3' cctttAGGGACC--GTTACACTa 5'
		|:|:||| |||||||
		Ref: 5' agactTTCTTGGAAAAATGTGAa 3'
circ4082	miR-23a	Query: 3' cctttagggaccgTTACACTa 5'
		|||||||
		Ref: 5' gccacggacgccgAATGTGAc 3'
circKIAA2026	miR-23a	Query: 3' cctttagggACCGTTACACTa 5'
		| | |||||||
		Ref: 5' ctggagaaaTTGAAATGTGAc 3'
circMYBPC2_3	miR-23a	Query: 3' cctttAGGGACCGTTACACTa 5'
		||| | |||||||
		Ref: 5' gggccTCCACAG-AATGTGAt 3'
circZNF292	miR-23a	Query: 3' ccttTAGGGACCGTTACACTa 5'
		| |:||| |||||||
		Ref: 5' tcttACCTCTG--AATGTGAa 3'
circATF7IP	miR-23a	Query: 3' cctTTAGGGACCGTTACACTa 5'
		:|| :| | |||||||
		Ref: 5' gatGATGATTTGAAATGTGAa 3'
circ4082	miR-23b	Query: 3' accattAGGGACC--GTTACACTa 5'
		|:|:||| |||||||
		Ref: 5' cagactTTCTTGGAAAAATGTGAa 3'
circ4082	miR-23b	Query: 3' accattagggaccgTTACACTa 5'
		|||||||
		Ref: 5' tgccacggacgccgAATGTGAc 3'
circKIAA2026	miR-23b	Query: 3' accattagggACCGTTACACTa 5'
		| | |||||||
		Ref: 5' actggagaaaTTGAAATGTGAc 3'
circMYBPC2_3	miR-23b	Query: 3' accattAGGGACCGTTACACTa 5'
		||| | |||||||
		Ref: 5' agggccTCCACAG-AATGTGAt 3'
circZNF292	miR-23b	Query: 3' accATTAGGGACCGTTACACTa 5'
		| | |:||| |||||||
		Ref: 5' atcTTACCTCTG--AATGTGAa 3'
circATF7IP	miR-23b	Query: 3' accATTAGGGACCGTTACACTa 5'
		|:|| :| | |||||||
		Ref: 5' ggaTGATGATTTGAAATGTGAa 3'
circ4082	miR-27a	Query: 3' cgccttGAATCGGTGACACTt 5'
		|| | |||||||
		Ref: 5' gttctcCTGCACGACTGTGAc 3'
circKIAA2026	miR-27a	Query: 3' cgCCTTGA--ATCGG-TGACACTt 5'
		|||| | | || |||||||
		Ref: 5' atGGAAGTGAAATCCAACTGTGAa 3'
circPFKFB1	miR-27a	Query: 3' cgcCTTGAATCGGTGACACTt 5'
		|| : || |||||||
		Ref: 5' cctGATTATATAGACTGTGAc 3'
circTRMT11	miR-27a	Query: 3' cgCCTTGA--A-TCGGTGACACTt 5'
		| |||| | ||| |||||||
		Ref: 5' ttGAAACTCATCAGCAACTGTGAg 3'
circ4082	miR-27b-3p	Query: 3' cgtcttGAATCGGTGACACTt 5'
		|| | |||||||
		Ref: 5' gttctcCTGCACGACTGTGAc 3'
circKIAA2026	miR-27b-3p	Query: 3' cgTCTTGA--ATCGG-TGACACTt 5'
		:||| | | || |||||||
		Ref: 5' atGGAAGTGAAATCCAACTGTGAa 3'
circPFKFB1	miR-27b-3p	Query: 3' cgtCTTGAATCGGTGACACTt 5'
		|| : || |||||||
		Ref: 5' cctGATTATATAGACTGTGAc 3'
circTRMT11	miR-27b-3p	Query: 3' cgtcTTGA--A-TCGGTGACACTt 5'
		|||| | ||| |||||||
		Ref: 5' ttgaAACTCATCAGCAACTGTGAg 3'
circ4082	miR-296-5p	Query: 3' tgtccTAACCCCCCCCGGGAg 5'
		:||| | |||||||
		Ref: 5' ctcacGTTGAGCAGGGCCCTt 3'
circ0470	miR-30a-5p	Query: 3' gaaggtcagcTCCTACAAATGt 5'
		|||||||||||
		Ref: 5' cagaagaagaAGGATGTTTACc 3'
circPREPL	miR-30a-5p	Query: 3' gaagGT-CAGCTCCTACAAATGt 5'
		|| | :|: |||||||
		Ref: 5' taaaCATGGTGGTTTTGTTTACt 3'
circPTGES3	miR-30a-5p	Query: 3' gaAGGTCAGCTCCTACAAATGt 5'
		|| | |: | | |||||||
		Ref: 5' gaTCAATTTTATGTTGTTTACg 3'
circ0470	miR-30b-5p	Query: 3' tcgactcaCATCCTACAAATGt 5'
		| |||||||||||
		Ref: 5' cagaagaaGAAGGATGTTTACc 3'
circPREPL	miR-30b-5p	Query: 3' tcgactcaCATC-CTACAAATGt 5'
		||:| |||||||
		Ref: 5' taaacatgGTGGTTTTGTTTACt 3'
circPTGES3	miR-30b-5p	Query: 3' tcgacTCACATCCTACAAATGt 5'
		| | || | |||||||
		Ref: 5' gatcaATTTTATGTTGTTTACg 3'
circ0470	miR-30c-5p	Query: 3' cgacTCTCACATCCTACAAATGt 5'
		||| | |||||||||||
		Ref: 5' cagaAGA-AGAAGGATGTTTACc 3'
circPREPL	miR-30c-5p	Query: 3' cgacTCTCACATC-CTACAAATGt 5'
		| | ||:| |||||||
		Ref: 5' ttaaACATGGTGGTTTTGTTTACt 3'
circPTGES3	miR-30c-5p	Query: 3' cgactcTCACATCCTACAAATGt 5'
		| | || | |||||||
		Ref: 5' agatcaATTTTATGTTGTTTACg 3'
circ0470	miR-30d	Query: 3' tcgaaggtcagccCCTACAAATGt 5'
		||||||||||
		Ref: 5' ctcagaagaagaaGGATGTTTACc 3'
circPREPL	miR-30d	Query: 3' tcgaagGT-CAGCCCCTACAAATGt 5'
		|| | :|| |||||||
		Ref: 5' attaaaCATGGTGGTTTTGTTTACt 3'
circPTGES3	miR-30d	Query: 3' tcgaAGGTCAGCCCCTACAAATGt 5'
		|| | |: | |||||||
		Ref: 5' cagaTCAATTTTATGTTGTTTACg 3'
circ4082	miR-320	Query: 3' aagCGGGAGAGTTGGGTCGAAAa 5'
		||||| : ::|||||||
		Ref: 5' aagGCCCT---GCTTCAGCTTTg 3'
circ4082	miR-339	Query: 3' acTCGAG--GACCTCCTGTCCCt 5'
		|| || |||| |||||||
		Ref: 5' caAGGTCAAGTGGATGACAGGGa 3'
circEZH1	miR-339	Query: 3' actcgaggaccTC-CTGTCCCt 5'
		|| |||||||
		Ref: 5' aagaaggggacAGTGACAGGGa 3'
circNCBP3	miR-339	Query: 3' actcgaggacCTCCTGTCCCt 5'
		|| |||||||
		Ref: 5' catggatgccGACGACAGGGt 3'
circ4082	miR-339-5p	Query: 3' cacTCGAG--GACCTCCTGTCCCt 5'
		|| || |||| |||||||
		Ref: 5' acaAGGTCAAGTGGATGACAGGGa 3'
circEZH1	miR-339-5p	Query: 3' cactcgaggaccTC-CTGTCCCt 5'
		|| |||||||
		Ref: 5' aaagaaggggacAGTGACAGGGa 3'
circNCBP3	miR-339-5p	Query: 3' cactcgaggacCTCCTGTCCCt 5'
		|| |||||||
		Ref: 5' acatggatgccGACGACAGGGt 3'
circ3514	miR-423-5p	Query: 3' ttTCAGAGCGAGAGACGGGGAGt 5'
		|| ||| ||| |||||||
		Ref: 5' ccAGCAGCGC-CTCGGCCCCTCc 3'
circKANSL1L_5	miR-423-5p	Query: 3' ttTCAGAGCGAGAGACGGGGAGt 5'
		||| |:| | ||||||||
		Ref: 5' acAGT-TTGAT---TGCCCCTCt 3'
circPLCE1(3)	miR-423-5p	Query: 3' tttcagAGCGAGA-GACGGGGAGt 5'
		|:| ||| | |||||||
		Ref: 5' aactgaTTGATCTGCAGCCCCTCa 3'
circ4082	miR-4334-3p	Query: 3' ctcgaggACCTCCTGTCCCt 5'
		|||| |||||||
		Ref: 5' ggtcaagTGGATGACAGGGa 3'
circEZH1	miR-4334-3p	Query: 3' ctcgaggaccTC-CTGTCCCt 5'
		|| |||||||
		Ref: 5' agaaggggacAGTGACAGGGa 3'
circNCBP3	miR-4334-3p	Query: 3' ctcgaggacCTCCTGTCCCt 5'
		|| |||||||
		Ref: 5' atggatgccGACGACAGGGt 3'
circ4082	miR-450c-3p	Query: 3' tgCTT--ACGTTTTAC-----AAGGGTTa 5'
		||| | ||||| | |||||||
		Ref: 5' gcGAACTTTCAAAAAGAGGCTTTCCCAAc 3'
circMSH3	miR-450c-3p	Query: 3' tgcttacGTTTTACAAGGGTTa 5'
		||: ||||||||||
		Ref: 5' acaggacCAGTATGTTCCCAAt 3'
circPREPL	miR-450c-3p	Query: 3' tgcTTACGTTTTA--CAAGGGTTa 5'
		|||| ||: | |||||||
		Ref: 5' tgtAATGGAAGCTTCTTTCCCAAa 3'
circ3514	miR-500	Query: 3' tcttaGGAACG-GGTCCACGTa 5'
		|| || |||||||||
		Ref: 5' ccccgCCCGGCACCAGGTGCAt 3'

## Sheet: E
Predicted target analysis of DE miRNAs with DE coding genes that related to myogenesis between LW1D and LW90D samples
Query	Ref	Binding
miR-1	IFRD1	Query: 3' atgtaTGAAGAAATGTAAGGt 5'
		|| : | |||||||
		Ref: 5' actgcACCATATCACATTCCc 3'
miR-1	LMOD2	Query: 3' atgtaTGAAGAAATGTAAGGt 5'
		||| | |||||||
		Ref: 5' ctgtcACTCC--CACATTCCc 3'
miR-1	TPM3	Query: 3' atgtatgaagaaaTGTAAGGt 5'
		|||||||
		Ref: 5' ccatttgtaaaaaACATTCCa 3'
miR-122	FKBP1A	Query: 3' tgTTTGTGGTAACAGTGTGAGGt 5'
		:|||||| | | |||||||
		Ref: 5' gtGAACACCCATAT-ACACTCCa 3'
miR-122	MEF2D	Query: 3' tgTTTG---TGGTA-ACAGTGTGAGGt 5'
		|||| || || ||||||||
		Ref: 5' ccAAACCCGACAATCACCCACACTCCt 3'
miR-122	TMOD1	Query: 3' tgtTTGT-GGTAACAG-TGTGAGGt 5'
		|||| :| || |: |||||||
		Ref: 5' atcAACATTCTTTATTAACACTCCt 3'
miR-125b	ACTN2	Query: 3' agtGTTCAATCCCA--GAGTCCCt 5'
		||:| |: ||| |||||||
		Ref: 5' tgcCAGGCTGAGGTCACTCAGGGt 3'
miR-125b	CLCN1	Query: 3' agtgttcaatcCCAGAGTCCCt 5'
		|| |||||||
		Ref: 5' gaccacctcctGGCCTCAGGGa 3'
miR-125b	FBXO40	Query: 3' agtgTTCAATCC-CAGAGTCCCt 5'
		|:| |:|| ||||||||
		Ref: 5' aaggAGGATGGGTATCTCAGGGa 3'
miR-125b	FKBP1A	Query: 3' agtgttcaATCCCAGAGTCCCt 5'
		|| ||||||||
		Ref: 5' aacgtcacTATCATCTCAGGGa 3'
miR-125b	LEMD2	Query: 3' agtgttcaatcccaGAGTCCCt 5'
		|||||||
		Ref: 5' ctctcagagctgacCTCAGGGg 3'
miR-125b	LMOD2	Query: 3' agtgttcaatccCAGAGTCCCt 5'
		| |||||||
		Ref: 5' attatcctcgatGCCTCAGGGt 3'
miR-1285	CLCN1	Query: 3' tgccccaGAGCGATACAACGGGTc 5'
		||| : : |||||||
		Ref: 5' cagtaccCTCCTGGCCTTGCCCAt 3'
miR-1285	MEF2D	Query: 3' tgccccagagcgatacAACGGGTc 5'
		|||||||
		Ref: 5' catgcatcccagagccTTGCCCAg 3'
miR-130a	ATF3	Query: 3' taCGGGAAAATTGTAACGTGAc 5'
		|:||| | :|||||||
		Ref: 5' agGTCCTCT----GTTGCACTa 3'
miR-130a	FBXO40	Query: 3' tacgggaaaattgtAACGTGAc 5'
		|||||||
		Ref: 5' aaataaaagctgttTTGCACTc 3'
miR-130a	IFRD1	Query: 3' tacGGGAAAATTGTAACGTGAc 5'
		:::||| : |||||||
		Ref: 5' tttTTTTTTCTTTCTTGCACTt 3'
miR-130a	SCN7A	Query: 3' tacgggaaAATTGTAACGTGAc 5'
		|||:: |||||||
		Ref: 5' aatgcaaaTTAGT-TTGCACTg 3'
miR-1343	ANKRD2	Query: 3' cgctctCACGCCCGGGGTCCTc 5'
		|||: ||||||||
		Ref: 5' tcctctGTGTTCACCCCAGGAa 3'
miR-1343	CLCN1	Query: 3' cgCTCTCACGCCCGGGGTCCTc 5'
		|| || | || |||||||
		Ref: 5' gtGA-AGGGAGG--CCCAGGAt 3'
miR-1343	CLCN1	Query: 3' cgctctcACGCCCGGGGTCCTc 5'
		||| :|||||||
		Ref: 5' attgcccTGCCTTTCCCAGGAg 3'
miR-1343	CLCN1	Query: 3' cgcTCTCACGCCCGGGGTCCTc 5'
		|| || :|||||||
		Ref: 5' aatAGCCAGCCCCTCCCAGGAa 3'
miR-1343	CLCN1	Query: 3' cgctctcacgcccgGGGTCCTc 5'
		|||||||
		Ref: 5' gggccactagttcaCCCAGGAa 3'
miR-1343	MAFF	Query: 3' cgctctcacgcccGGGGTCCTc 5'
		:|||||||
		Ref: 5' cccctcttcacccTCCCAGGAt 3'
miR-1343	TPM4	Query: 3' cgctctcacgcccgGGGTCCTc 5'
		|||||||
		Ref: 5' taagcgtcacactaCCCAGGAg 3'
miR-136	COPS2	Query: 3' aggtagtagttttgtTTACCTCa 5'
		|||||||
		Ref: 5' caaggtgactaccgtAATGGAGa 3'
miR-136	FBXO40	Query: 3' aggtagtagTTTTGTTTACCTCa 5'
		:|: |||||||||
		Ref: 5' ttaagctagGAGTCAAATGGAGc 3'
miR-136	FBXO40	Query: 3' aggTA-GTAGTTTTGTTTACCTCa 5'
		|| ::|| | | :|||||||
		Ref: 5' tgaATGTGTCTATA-GAATGGAGg 3'
miR-136	FKBP1A	Query: 3' agGTAGTAGTTTTGTTTACCTCa 5'
		| | | ||:| ||||||||
		Ref: 5' atCCTGAGAAAGAAAAATGGAGc 3'
miR-142-3p	FKBP1A	Query: 3' ggtATTTCATCCTTTGTGATGt 5'
		|:|: |: ::|||||||
		Ref: 5' cacTGAGCTGTTGGACACTACa 3'
miR-142-3p	FKBP1A	Query: 3' ggTATTTCATCCTTTGTGATGt 5'
		|| || | |||||||
		Ref: 5' gaATTAACATTTATACACTACt 3'
miR-142-3p	TPM4	Query: 3' ggTATTTCATCCTTTGTGATGt 5'
		|| ||| | |||||||
		Ref: 5' ttATTAAG--CGTCACACTACc 3'
miR-142-5p	CHRNB1	Query: 3' tcatcacgaaaGA-TGAAATAc 5'
		|| |||||||
		Ref: 5' gatacaaaaagCTCACTTTATa 3'
miR-142-5p	COPS2	Query: 3' tcatcacGAAAGATGAAATAc 5'
		|| |: |||||||
		Ref: 5' tcacacaCTATTAACTTTATa 3'
miR-142-5p	PLAGL1	Query: 3' tcATCACGAAAGA-----TGAAATAc 5'
		|| ||:| || |||||||
		Ref: 5' aaTAATGTTAACTAAGTAACTTTATg 3'
miR-142-5p	SCN7A	Query: 3' tcaTCACGAAAG-----ATGAAATAc 5'
		||| ||||: ||||||||
		Ref: 5' taaAGTACTTTTCACTGTACTTTATt 3'
miR-142-5p	TMOD1	Query: 3' tcatcacgaaagATGAAATAc 5'
		||||||||
		Ref: 5' agcgttgtaagaTACTTTATt 3'
miR-146a-5p	COPS2	Query: 3' ttGGGTACCTTA--AGTCAAGAGt 5'
		|:| |||||| ||||||||
		Ref: 5' agCTCTTGGAATGCCCAGTTCTCt 3'
miR-146a-5p	FBXO40	Query: 3' ttgggTACCTTAAGTCAAGAGt 5'
		| |||| |||||||
		Ref: 5' ggaagAAGGAA--GAGTTCTCc 3'
miR-146a-5p	FKBP1A	Query: 3' ttgggtaccTTAAGTCAAGAGt 5'
		|| |||||||
		Ref: 5' aaaataaacAAACGAGTTCTCt 3'
miR-146a-5p	FOXN2	Query: 3' ttGGGTACCTT-AAGTCAAGAGt 5'
		::::| || | |||||||
		Ref: 5' atTTTGTTCAACTGAAGTTCTCt 3'
miR-146a-5p	MAFF	Query: 3' ttgggTACCTTAAGTCAAGAGt 5'
		|| |:| |||||||
		Ref: 5' tctgaATAAAGTCAAGTTCTCt 3'
miR-146a-5p	PLAGL1	Query: 3' ttGGGTAC-CTTAAGTCAAGAGt 5'
		|::: | ||| |||||||
		Ref: 5' ggCTTGAGAGAAGAGAGTTCTCg 3'
miR-199b-5p	ACTN2	Query: 3' ttgtctaTCAGATTTGTGACCc 5'
		||| ||||||||
		Ref: 5' ctgctgcAGTGACAACACTGGa 3'
miR-199b-5p	ATF3	Query: 3' ttgTCTATCAG-ATTTGTGACCc 5'
		||| |||| | |||||||
		Ref: 5' gtgAGAAAGTCATTCACACTGGc 3'
miR-199b-5p	RB1	Query: 3' ttgTCTATCAGATTTGTGACCc 5'
		| ||:|||| |||||||
		Ref: 5' tcaACATGGTCT-TACACTGGc 3'
miR-199b-5p	TPM3	Query: 3' ttgtctatcagattTGTGACCc 5'
		|||||||
		Ref: 5' tttggggttggggcACACTGGt 3'
miR-19a	FBXO40	Query: 3' agtcaaaacgtatCTAAACGTGt 5'
		| |||||||
		Ref: 5' agaaataaaagctGTTTTGCACt 3'
miR-19a	MEF2D	Query: 3' agtcaaaacgtatctAAACGTGt 5'
		|||||||
		Ref: 5' gggaaggggggacacTTTGCACg 3'
miR-19a	MYBPC1	Query: 3' agtcaaaacgTATCTAAACGTGt 5'
		| | :|||||||
		Ref: 5' aaaaaaagagAAATGTTTGCACg 3'
miR-19a	SCN7A	Query: 3' agtcaaaACGT---ATCTAAACGTGt 5'
		|||| ||| |||||||
		Ref: 5' tagtgaaTGCAAATTAG-TTTGCACt 3'
miR-19b	FBXO40	Query: 3' agtcaaaacgtacCTAAACGTGt 5'
		| |||||||
		Ref: 5' agaaataaaagctGTTTTGCACt 3'
miR-19b	MEF2D	Query: 3' agtcaaaacgtacctAAACGTGt 5'
		|||||||
		Ref: 5' gggaaggggggacacTTTGCACg 3'
miR-19b	MYBPC1	Query: 3' agtcaaaacgTACCTAAACGTGt 5'
		||| |||||||
		Ref: 5' aaaaagagaaATG--TTTGCACg 3'
miR-19b	SCN7A	Query: 3' agtcaaaACG--TACCTAAACGTGt 5'
		||| || :|||||||
		Ref: 5' tagtgaaTGCAAATTAGTTTGCACt 3'
miR-214	ACTN2	Query: 3' gacggacaGACACGGACGACa 5'
		|| |||||||
		Ref: 5' actggatcCTTAACCTGCTGc 3'
miR-214	COPS2	Query: 3' gacggACAGACACGGACGACa 5'
		| |:| |||||||
		Ref: 5' tgttaTTTTTAAACCTGCTGg 3'
miR-214	COPS2	Query: 3' gacggacagacacGGACGACa 5'
		|||||||
		Ref: 5' ttttagggccacaCCTGCTGc 3'
miR-214	FKBP1A	Query: 3' gaCGGACAGACACGGACGACa 5'
		||: || |||||||
		Ref: 5' atGCTCAGCTCCCCCTGCTGa 3'
miR-214	MAFF	Query: 3' gacgGACAGACACGGACGACa 5'
		|| |||| |||||||
		Ref: 5' agagCTTCCTGTCCCTGCTGt 3'
miR-214	MAFF	Query: 3' gacggacagacACGGACGACa 5'
		| |||||||
		Ref: 5' aaagccacggcTTCCTGCTGc 3'
miR-214	MEF2D	Query: 3' gaCGGACAGACA-CGGACGACa 5'
		||:| | || |||||||
		Ref: 5' caGCTTACCCGTCACCTGCTGa 3'
miR-214	TMOD1	Query: 3' gaCGGAC-AGACACGGACGACa 5'
		||| | | | |||||||
		Ref: 5' gtGCCGGCACAGACCCTGCTGt 3'
miR-218	ACTN2	Query: 3' tgtaccaaTCTAGTTCGTGTt 5'
		||| |||||||
		Ref: 5' ttttcaaaAGA-AAAGCACAc 3'
miR-218	ANKRD1	Query: 3' tgTACCAATCTAGTTCGTGTt 5'
		|| || || |||||||
		Ref: 5' tgATATTTTGAGAAAGCACAg 3'
miR-218	FOXN2	Query: 3' tgtaccAATCTAGTTCGTGTt 5'
		|| | |||||||
		Ref: 5' cattttTTTCTTAAAGCACAt 3'
miR-218	MEF2D	Query: 3' tgtaccaatcTAGTTCGTGTt 5'
		|| |||||||
		Ref: 5' gggggcccctATGAAGCACAt 3'
miR-218-5p	ACTN2	Query: 3' tgtaccaaTCTAGTTCGTGTt 5'
		||| |||||||
		Ref: 5' ttttcaaaAGA-AAAGCACAc 3'
miR-218-5p	ANKRD1	Query: 3' tgTACCAATCTAGTTCGTGTt 5'
		|| || || |||||||
		Ref: 5' tgATATTTTGAGAAAGCACAg 3'
miR-218-5p	FOXN2	Query: 3' tgtaccAATCTAGTTCGTGTt 5'
		|| | |||||||
		Ref: 5' cattttTTTCTTAAAGCACAt 3'
miR-218-5p	MEF2D	Query: 3' tgtaccaatcTAGTTCGTGTt 5'
		|| |||||||
		Ref: 5' gggggcccctATGAAGCACAt 3'
miR-218b	ACTN2	Query: 3' gtgtaccaaTCTAGTTCGTGTt 5'
		||| |||||||
		Ref: 5' cttttcaaaAGA-AAAGCACAc 3'
miR-218b	ANKRD1	Query: 3' gtgTACCAATCTAGTTCGTGTt 5'
		|| || || |||||||
		Ref: 5' atgATATTTTGAGAAAGCACAg 3'
miR-218b	FOXN2	Query: 3' gtGTACCAATCTAG-TTCGTGTt 5'
		||| || |: |||||||
		Ref: 5' gcCATTTTTTTCTTAAAGCACAt 3'
miR-218b	MEF2D	Query: 3' gtgtaccaatcTAGTTCGTGTt 5'
		|| |||||||
		Ref: 5' cgggggcccctATGAAGCACAt 3'
miR-22-3p	BIN1	Query: 3' tgtcaAGAAGTTGACCGTCGAa 5'
		||||: |||||||||
		Ref: 5' ggcccTCTTTTCCTGGCAGCTg 3'
miR-22-3p	CLCN1	Query: 3' tgtcaagaagttgaCCGTCGAa 5'
		|||||||
		Ref: 5' gaaccaggacccagGGCAGCTg 3'
miR-22-3p	FKBP1A	Query: 3' tgtcaagaAGTTGACCGTCGAa 5'
		| ::|||||||||
		Ref: 5' ctatgatgTAGGCTGGCAGCTg 3'
miR-22-3p	FKBP1A	Query: 3' tgtcaagaagtTGACCGTCGAa 5'
		:|||||||||
		Ref: 5' gctgtggctgtGCTGGCAGCTg 3'
miR-22-3p	IFRD1	Query: 3' tgtcaagaAGTTGACCGTCGAa 5'
		|||: |||||||
		Ref: 5' gtccgaggTCAG--GGCAGCTg 3'
miR-22-3p	LEMD2	Query: 3' tgTCAAGAAGTTGACCGTCGAa 5'
		:||| : | |||||||
		Ref: 5' cgGGTTGCGGGCCAGGCAGCTg 3'
miR-22-3p	MAFF	Query: 3' tgtcaagaagttgaCCGTCGAa 5'
		|||||||
		Ref: 5' tggccctggggaggGGCAGCTc 3'
miR-22-5p	BIN1	Query: 3' attTCGAACGGTG-ACTTCTTGa 5'
		| || | :| ||||||||
		Ref: 5' agcACCTGGGAGCGTGAAGAACa 3'
miR-22-5p	COPS2	Query: 3' attTCGAACGGTGACTTCTTGa 5'
		||: | | |||||||
		Ref: 5' tatAGTGTCAAAAGGAAGAACt 3'
miR-22-5p	MEF2D	Query: 3' atttcGAACGGTGACTTCTTGa 5'
		||| || |||||||||
		Ref: 5' cactcCTT-CCTCTGAAGAACt 3'
miR-24-1-5p	TPM4	Query: 3' tgACACAAA-GTCGA-GTCATCCGTg 5'
		|| ||| : || ||||||||
		Ref: 5' atTGCATTTATTCCTAAAGTAGGCAg 3'
miR-24-3p	BIN1	Query: 3' gacaaGGACGACTTGACTCGGt 5'
		|||| |: |||||||
		Ref: 5' gcgggCCTG-GGGCCTGAGCCc 3'
miR-24-3p	FKBP1A	Query: 3' gaCAAG-GACGACTTGACTCGGt 5'
		|||| :||| | |||||||
		Ref: 5' gaGTTCATTGCCG--CTGAGCCa 3'
miR-24-3p	FKBP1A	Query: 3' gacaaggacGACTTGACTCGGt 5'
		| || |||||||
		Ref: 5' cagcaacacCAGATCTGAGCCa 3'
miR-24-3p	FKBP1A	Query: 3' gaCAAGGA--CGACTTGACTCGGt 5'
		| |||| || |||||||
		Ref: 5' caGATCCTCAGC-CTCCTGAGCCa 3'
miR-24-3p	IFRD1	Query: 3' gacAAGGA-CGACT--TGACTCGGt 5'
		||| | | || ||||||||
		Ref: 5' tctTTCATATCAGATCACTGAGCCt 3'
miR-24-3p	MAFF	Query: 3' gacaaggacgactTGACTCGGt 5'
		||||||||
		Ref: 5' --------tgcccACTGAGCCc 3'
miR-24-3p	MEF2D	Query: 3' gaCAAGGACG-AC-TTGACTCGGt 5'
		|| ||| : || |||||||
		Ref: 5' gtGTACCTTTGTGTCTCTGAGCCc 3'
miR-27b-5p	FBXO40	Query: 3' acaagtggttagTCGATTCGAGa 5'
		|| |||||||
		Ref: 5' aggctatttggaAGATAAGCTCa 3'
miR-27b-5p	MAFF	Query: 3' acaAGTGGTTAGTCGATTCGAGa 5'
		| | || :: ||||||||
		Ref: 5' cccTAAGAAAGTGCCTAAGCTCa 3'
miR-27b-5p	MEF2D	Query: 3' acaAGTGGT-TAGTCGATTCGAGa 5'
		|| |:: :| | ||||||||
		Ref: 5' gaaTCTCTGCGTGAACTAAGCTCt 3'
miR-27b-5p	TMOD1	Query: 3' acAAGTGGTTAGT-CGATTCGAGa 5'
		| || ||| | |:|||||||
		Ref: 5' gaTCCAGCAAAAATGTTAAGCTCa 3'
miR-296-3p	ATF3	Query: 3' cctTTCGG--AGGCG-GGTTGGGa 5'
		::||| ||| | |||||||
		Ref: 5' gccGGGCCGTTCCACTCCAACCCa 3'
miR-296-3p	MAFF	Query: 3' cctTTCGGAGGCGGGTTGGGa 5'
		::||: | |||||||
		Ref: 5' tgtGGGCTGGGGGCCAACCCc 3'
miR-296-3p	MEF2D	Query: 3' cctTTCGGAGGCG--GGTTGGGa 5'
		::||| |||| |||||||
		Ref: 5' cctGGGCCACCGCCTCCAACCCc 3'
miR-299	FKBP1A	Query: 3' catacacccTGCCATTTGGTa 5'
		|| |||||||
		Ref: 5' gttgacaacACTATAAACCAg 3'
miR-299	TPM4	Query: 3' catACACCCTGC--CATTTGGTa 5'
		||||||| | |||||||
		Ref: 5' tacTGTGGGAAGTCATAAACCAc 3'
miR-323	COPS2	Query: 3' tctccagctggCACATTACACg 5'
		|| |||||||
		Ref: 5' ttatgacttaaGTCTAATGTGg 3'
miR-323	FBXO40	Query: 3' tctcCAGCTGGC-ACATTACACg 5'
		||| ::| |||||||||
		Ref: 5' gctcGTCTTTTGTTGTAATGTGc 3'
miR-323	FOXN2	Query: 3' tcTCCAGCT-GGCACATTACACg 5'
		| || || : | |||||||
		Ref: 5' caAAGTAGAGTATTTTAATGTGa 3'
miR-323	SCN7A	Query: 3' tctccagcTGGCA-CATTACACg 5'
		||: | |||||||
		Ref: 5' aaacaagtACTTTCTTAATGTGg 3'
miR-323	TMOD1	Query: 3' tctccaGCTGGCACATTACACg 5'
		| |: || |||||||
		Ref: 5' tataaaCTATGGT-TAATGTGa 3'
miR-335	CLCN1	Query: 3' gtaaaaagcaataaCGAGAACt 5'
		|||||||
		Ref: 5' ctgaccaagggtcaGCTCTTGa 3'
miR-335	COPS2	Query: 3' gtaaaaagcaataaCGAGAACt 5'
		|||||||
		Ref: 5' cccttaccctccaaGCTCTTGg 3'
miR-335	MEF2D	Query: 3' gtaaaaagcaaTAACGAGAACt 5'
		:|||||||||
		Ref: 5' agtatcccaagGTTGCTCTTGg 3'
miR-335	MEF2D	Query: 3' gtaaaaagcaataACGAGAACt 5'
		||||||||
		Ref: 5' gaccccacctcccTGCTCTTGg 3'
miR-335	MEF2D	Query: 3' gtaaaaagcaaTAACGAGAACt 5'
		:| |||||||
		Ref: 5' cagaaggacagGTGGCTCTTGc 3'
miR-361-3p	BIN1	Query: 3' cgtttagtCTTAGTGTGGACCCCc 5'
		|:: |: :|||||||
		Ref: 5' gccgctgtGGGGCGGGCCTGGGGc 3'
miR-361-3p	CLCN1	Query: 3' cgTTTAGTCTTAG-TGT-GGACCCCc 5'
		||: |||: | :|| |||||||
		Ref: 5' ccAAGAGAGAGGCTGCAGCCTGGGGa 3'
miR-361-3p	CLCN1	Query: 3' cgTTTAGTCTTAGTGTGGACCCCc 5'
		:|||| |:: :|||||||
		Ref: 5' taGAATCTCTCTTGGGCCTGGGGt 3'
miR-361-3p	FKBP1A	Query: 3' cgTTTAGTCTTAGTGTGGACCCCc 5'
		| :|::||:|| |||||||
		Ref: 5' gcACGTTGGAGTC---CCTGGGGa 3'
miR-361-3p	FKBP1A	Query: 3' cgtttaGTCT-TAGTGTGGACCCCc 5'
		|||: :|| |||||||
		Ref: 5' acactaCAGGTGTCTGTCCTGGGGc 3'
miR-361-3p	MAFF	Query: 3' cgTTTAGTCTT--AGTGT--GGACCCCc 5'
		||| ::|:| | |:: |||||||
		Ref: 5' tgAAACTGGGACTTGATGGCCCTGGGGa 3'
miR-361-3p	MEF2D	Query: 3' cgtTTAGTCTTAGTGTGGACCCCc 5'
		||||| ||| |||||||
		Ref: 5' gacAATCACCCACACTCCTGGGGc 3'
miR-361-3p	MEF2D	Query: 3' cgtttAGTCTTAGTGTGGACCCCc 5'
		|::||||| | |||||||
		Ref: 5' actctTTGGAATC-C-CCTGGGGt 3'
miR-361-3p	MEF2D	Query: 3' cgtTTAGTCTTAGTGTGGACCCCc 5'
		|: |||:: | | |||||||
		Ref: 5' tgcAGGCAGGG-CTCCCCTGGGGt 3'
miR-361-3p	MEF2D	Query: 3' cgtttagtcttaGTGTGGACCCCc 5'
		||| |||||||
		Ref: 5' agacggccccggCAC-CCTGGGGt 3'
miR-361-3p	MEF2D	Query: 3' cgtttagtcttaGTGTGGACCCCc 5'
		:|: |||||||
		Ref: 5' tccttttctctcTATCCCTGGGGc 3'
miR-363	ATF3	Query: 3' aatgtctacCTATGGCACGTTAa 5'
		|| ::||||||||
		Ref: 5' gcatctcgtGAAGTCGTGCAATg 3'
miR-363	FBXO40	Query: 3' aatgtCTACCTATGGCACGTTAa 5'
		| || | | |||||||
		Ref: 5' cagttGCTGCCTTCAGTGCAATa 3'
miR-363	FOXN2	Query: 3' aatgTCTACCTATGGCACGTTAa 5'
		| || || ::|||||||
		Ref: 5' tttaAAATTTAT-TTGTGCAATa 3'
miR-363	MEF2D	Query: 3' aatgTCTACCTATGGCACGTTAa 5'
		|||| |||| |||||||
		Ref: 5' tctaAGAT--ATACAGTGCAATa 3'
miR-363	MEF2D	Query: 3' aatgtctacctaTGGCACGTTAa 5'
		|| |||||||
		Ref: 5' cccctgcagttcACGGTGCAATa 3'
miR-363	TPM4	Query: 3' aaTGTCTACCTATGGCACGTTAa 5'
		||| | | |::|||||||
		Ref: 5' atACACTAGCAAATTGTGCAATt 3'
miR-369	FOXN2	Query: 3' tttCTAGTTGG---TACATAATAa 5'
		| |:||:: | |||||||
		Ref: 5' agtGCTTAATTTTAAAGTATTATg 3'
miR-370	FKBP1A	Query: 3' tgGTCCA-AGGTGG------GGTCGTCCg 5'
		||||| ||:::| ||||||||
		Ref: 5' taCAGGTGTCTGTCCTGGGGCCAGCAGGg 3'
miR-370	FKBP1A	Query: 3' tggtccaaggTGGGGTCGTCCg 5'
		||: |||||||
		Ref: 5' aaaaaaaagaACTGCAGCAGGa 3'
miR-370	FKBP1A	Query: 3' tggtccaaggtggGGTCGTCCg 5'
		||||||||
		Ref: 5' gacatacagatgaCCAGCAGGc 3'
miR-370	LEMD2	Query: 3' tgGTCCAAGGTGGGGTCGTCCg 5'
		|: | || || |||||||
		Ref: 5' cgCGTGCTCGTCCACAGCAGGc 3'
miR-370	LEMD2	Query: 3' tgGTCCAAGGTGGGGTCGTCCg 5'
		::|| ||| |||||||
		Ref: 5' ggTGGGCGCCA-GGCAGCAGGt 3'
miR-370	MEF2D	Query: 3' tggtccaaggtgGGGTCGTCCg 5'
		|:|||||||
		Ref: 5' gacgtgagatggCTCAGCAGGa 3'
miR-376a-3p	COPS2	Query: 3' tgcacctaAAAGGAGATACTa 5'
		| ||:|||||||
		Ref: 5' taaatcgcTCTCTTCTATGAa 3'
miR-376a-3p	FOXN2	Query: 3' tgcacctaaAAGGAGATACTa 5'
		| ::|||||||
		Ref: 5' taccttagcTATTTCTATGAt 3'
miR-376a-3p	MEF2D	Query: 3' tgcACCTAA-AAGGAGATACTa 5'
		||| || | ||||||||
		Ref: 5' cccTGGCTTCTAACTCTATGAc 3'
miR-382	COPS2	Query: 3' gctTAGGTGGTGCTTGTTGAa 5'
		|| : || : |||||||
		Ref: 5' tatATATTCCTTAAACAACTg 3'
miR-382	FBXO40	Query: 3' gcTTAGGTGGTGCTTGTTGAa 5'
		:| : ||::| |||||||
		Ref: 5' atGAGTAACTGC-AACAACTa 3'
miR-382	FOXN2	Query: 3' gcttAG-GTGGTGCTTGTTGAa 5'
		|| :|::| |||||||
		Ref: 5' ttgcTCATATTAAAAACAACTt 3'
miR-382	IFRD1	Query: 3' gcttaggtggtGCTTGTTGAa 5'
		| |||||||
		Ref: 5' cagggaagtatCTAACAACTg 3'
miR-382	TPM3	Query: 3' gcttAGGTGGTGCTTGTTGAa 5'
		||| ::: ||||||||
		Ref: 5' gagcTCCTTTGGGAACAACTt 3'
miR-411	FKBP1A	Query: 3' caATCACCTGG--CACAATGTa 5'
		|| ||:| |||||||
		Ref: 5' gcTAACTGATCAAATGTTACAa 3'
miR-421-3p	ANKRD1	Query: 3' cgCGGGTTAATTACAGACAACTa 5'
		||:| | || |||||||
		Ref: 5' taGCTC-TTAAAACCCTGTTGAc 3'
miR-421-3p	CHRNB1	Query: 3' cgCGGGTTAATTACAGACAACTa 5'
		|:::::| || |||||||
		Ref: 5' ttGTTTGGTCCAT-ACTGTTGAc 3'
miR-421-3p	FBXO40	Query: 3' cgCGGGTTAATTACAGACAACTa 5'
		|::: || :| |||||||
		Ref: 5' ggGTTTCATAGA--ACTGTTGAc 3'
miR-421-3p	FKBP1A	Query: 3' cgcgGGTTAATTACAGACAACTa 5'
		| || :| |||||||
		Ref: 5' aaaaCGAAAAGACAACTGTTGAa 3'
miR-421-3p	FOXN2	Query: 3' cgcgggTTAATTACAGACAACTa 5'
		||| ::|| |||||||
		Ref: 5' taataaAATCGGTG-CTGTTGAa 3'
miR-421-3p	MEF2D	Query: 3' cgCGGGTTAAT-TACAGACAACTa 5'
		|:|||| |: :|| |||||||
		Ref: 5' gaGTCCAAGTGTGTGGCTGTTGAt 3'
miR-421-3p	MEF2D	Query: 3' cgcgggttaatTACA-GACAACTa 5'
		:||| |||||||
		Ref: 5' tcttgtgctccGTGTCCTGTTGAc 3'
miR-421-3p	RB1	Query: 3' cgCGGGTTAA--TTACAGACAACTa 5'
		|::: ||| | | |||||||
		Ref: 5' taGTTTTATTCCACAGACTGTTGAc 3'
miR-424-3p	PLAGL1	Query: 3' tatcgtcgcggAGTGCAAAAc 5'
		| |||||||
		Ref: 5' ttcaaaaaaggTAACGTTTTa 3'
miR-424-3p	SCN7A	Query: 3' tatcgtcgcggAGTGCAAAAc 5'
		| |||||||
		Ref: 5' cttgacttaaaTGACGTTTTa 3'
miR-432-5p	COPS2	Query: 3' tgggttACTGGATGAGGTTCt 5'
		| ||| |||||||
		Ref: 5' taacccTTACC--CTCCAAGc 3'
miR-432-5p	FKBP1A	Query: 3' tgGGTTACTGGATGAGGTTCt 5'
		|||: || ||||||||
		Ref: 5' caCCAGGGA---ACTCCAAGa 3'
miR-432-5p	FKBP1A	Query: 3' tgGGTTACTGGATGAGGTTCt 5'
		| ||| | | |||||||
		Ref: 5' gcCGAATTA--TTCTCCAAGt 3'
miR-432-5p	MEF2D	Query: 3' tgggttactGGATGAGGTTCt 5'
		::| |||||||
		Ref: 5' ctgcctcccTTTCCTCCAAGg 3'
miR-450a	MYF6	Query: 3' tataaTCCTTGT-GTAGCGTTTt 5'
		:||:||| | |||||||
		Ref: 5' gggaaGGGGACATCTTCGCAAAg 3'
miR-450b-5p	ACTN2	Query: 3' ataagTCCTTGTATAACGTTTt 5'
		||| ||| |||||||
		Ref: 5' caacaAGGCACA-CTTGCAAAt 3'
miR-450b-5p	ACTN2	Query: 3' atAAGTC-CTTGTATAACGTTTt 5'
		| ||| : | ||||||||
		Ref: 5' ctTGCAGATGTCCCATTGCAAAa 3'
miR-450b-5p	CHRNB1	Query: 3' atAAGTCCTTGTATAACGTTTt 5'
		| || |: | :|||||||
		Ref: 5' taTGCATCAG-AGGTTGCAAAc 3'
miR-450b-5p	COPS2	Query: 3' ataAGTCCTTGTATAACGTTTt 5'
		|: | :||| |||||||
		Ref: 5' acgTTTGCTGCATTTTGCAAAa 3'
miR-450b-5p	MYBPC1	Query: 3' atAAGTCCTTGTATAACGTTTt 5'
		|||| || | ||||||||
		Ref: 5' gcTTCATTAA-AAATTGCAAAc 3'
miR-450b-5p	RB1	Query: 3' atAAGTCC--TTGTAT--AACGTTTt 5'
		||:: | :|| || |||||||
		Ref: 5' atTTTGTGCTGACTTAAGTTGCAAAc 3'
miR-450c-5p	MYF6	Query: 3' cataaTCCTTGT-GTAGCGTTTt 5'
		:||:||| | |||||||
		Ref: 5' gggaaGGGGACATCTTCGCAAAg 3'
miR-455-5p	FBXO40	Query: 3' gctacATCAGGTTTCCGTGTAt 5'
		||| :: ||||||||
		Ref: 5' ctaaaTAGATTTCAGGCACATg 3'
miR-455-5p	MEF2D	Query: 3' gctACATCAGGTTTCCGTGTAt 5'
		|||:| ||| :|||||||
		Ref: 5' ttcTGTGG-CCATGGGCACATg 3'
miR-455-5p	MEF2D	Query: 3' gctaCATCA-GGTTTCCGTGTAt 5'
		| :|| : :::|||||||
		Ref: 5' gagaGGGGTGTGGGGGGCACATa 3'
miR-486	ATF3	Query: 3' gagcccCGTCGAGTCATGTCCt 5'
		|| |:|| |||||||
		Ref: 5' aaatatGCTGTTCTGTACAGGa 3'
miR-486	FBXO40	Query: 3' gaGCCCCGTCGA-GTCATGTCCt 5'
		| ||||| || ||||||||
		Ref: 5' ccCAGGGCACCTAGAGTACAGGg 3'
miR-486	TMOD1	Query: 3' gagccccgtcgaGTCATGTCCt 5'
		|||||||||
		Ref: 5' taatgacgtggaCAGTACAGGg 3'
miR-487b	ACTN2	Query: 3' gcTTGTC-CTGTCCCTATTGGTg 5'
		::||| | | ||||||||
		Ref: 5' gtGGCAGATAAACAGATAACCAg 3'
miR-487b	FBXO40	Query: 3' gcTTGTC-CTGT-CCCTATTGGTg 5'
		|:||| || | |||||||
		Ref: 5' cgAGCAGTGAAATTCCATAACCAg 3'
miR-487b	FKBP1A	Query: 3' gcTTGTCCTGTCCCTATTGGTg 5'
		||:| | | ||||||||
		Ref: 5' taAATATAAAATAGATAACCAc 3'
miR-487b	FKBP1A	Query: 3' gcttgtccTGTCCCTATTGGTg 5'
		|||| |||||||
		Ref: 5' ccttcgccACAGCTATAACCAg 3'
miR-487b	MEF2D	Query: 3' gcttGTC-CTGTCCC--TATTGGTg 5'
		||| | |||| |||||||
		Ref: 5' ccccCAGATAGAGGGAAATAACCAa 3'
miR-493-3p	FKBP1A	Query: 3' ggaccgtgtGTCATCTGGAAGt 5'
		|| :|||||||
		Ref: 5' acttaatgcCAAGGGACCTTCc 3'
miR-493-3p	FKBP1A	Query: 3' ggaccgtgtgtcaTCTGGAAGt 5'
		:|||||||
		Ref: 5' agctctgagcttgGGACCTTCc 3'
miR-493-3p	MEF2D	Query: 3' ggACCGTG---TGTCAT-CTGGAAGt 5'
		|||| : || || |||||||
		Ref: 5' ccTGGCTTCTAACTCTATGACCTTCc 3'
miR-493-5p	TPM3	Query: 3' ttACTT-TCGGATGGTACATGTt 5'
		|||| |||:| |||||||
		Ref: 5' ctTGAATAGCTT---ATGTACAa 3'
miR-493-5p	TPM3	Query: 3' ttACTTTCGGATGG----TACATGTt 5'
		| ||||| |::: |||||||
		Ref: 5' ctTTAAAGCATGTTCGTGATGTACAc 3'
miR-504	ACTN2	Query: 3' tctatctcacgtctGGTCCCAGa 5'
		||||||||
		Ref: 5' tagccaaggcttctCCAGGGTCt 3'
miR-504	ACTN2	Query: 3' tctatctcACGTCTG-GTCCCAGa 5'
		|| | | |||||||
		Ref: 5' ctccttccTGATGCCACAGGGTCt 3'
miR-504	FKBP1A	Query: 3' tcTATC-TCACGTCTGGTCCCAGa 5'
		| || | | ::||:|||||||
		Ref: 5' tcAAAGAAATCTGGATCAGGGTCa 3'
miR-504	MAFF	Query: 3' tcTATCTCACGTCTGGTCCCAGa 5'
		:| |:||| ||::|||||||
		Ref: 5' agGTTGGGTG-AGGTCAGGGTCt 3'
miR-504	TPM4	Query: 3' tctatctcacgtctGGTCCCAGa 5'
		:|||||||
		Ref: 5' atttaatcccttctTCAGGGTCa 3'
miR-532-5p	COPS2	Query: 3' tgCCAGGATGTGAGTTCCGTAc 5'
		|| |:|| | ||||||||
		Ref: 5' atGGACTTA-AAACAAGGCATg 3'
miR-532-5p	FBXO40	Query: 3' tgccaggatgtgagTTCCGTAc 5'
		|||||||
		Ref: 5' caagaagggtcaagAAGGCATt 3'
miR-542-3p	ACTN2	Query: 3' aaagtcaatagTTAGACAGTGt 5'
		:| |||||||
		Ref: 5' tggcttgatagGACCTGTCACa 3'
miR-542-3p	COPS2	Query: 3' aaaGTCAATAGTTAGACAGTGt 5'
		:|| |: || |||||||
		Ref: 5' ttaTAG-TGGCATACTGTCACt 3'
miR-542-3p	FKBP1A	Query: 3' aaagTCAATAGTTAGACAGTGt 5'
		|| |:| : ||||||||
		Ref: 5' accgAG-TGT-GTTCTGTCACt 3'
miR-542-3p	LMOD2	Query: 3' aaagTCAATAGTTAGACAGTGt 5'
		:| |||||: |||||||
		Ref: 5' tccaGGGTATCAG-CTGTCACt 3'
miR-7142-3p	ACTN2	Query: 3' agTGAAGTCTCCTCGGTTGTTt 5'
		:||| |:| | |||||||
		Ref: 5' atGCTT--GGGTACCCAACAAg 3'
miR-7142-3p	FBXO40	Query: 3' agtgaagtctccTCGGTTGTTt 5'
		|||||||||
		Ref: 5' aacaaagaatttAGCCAACAAc 3'
miR-7142-3p	FKBP1A	Query: 3' agTGAAGTCTCCTCGGTTGTTt 5'
		||| | | || |||||||
		Ref: 5' aaACT--ATATGA-CCAACAAa 3'
miR-7142-3p	FKBP1A	Query: 3' agtgaagtctcctcGGTTGTTt 5'
		|||||||
		Ref: 5' tggtcatttaatctCCAACAAa 3'
miR-758	ANKRD2	Query: 3' caaTC-ACCTGGTCCAGTGTTt 5'
		|| |||| :||||||||
		Ref: 5' tacAGCTGGA--GGGTCACAAg 3'
miR-758	FBXO40	Query: 3' caaTCACCTGGTCCAGTGTTt 5'
		|| |: || |||||||
		Ref: 5' ttcAGGAGGGCA-GTCACAAg 3'
miR-885-3p	ATF3	Query: 3' taGGTGATGTGGGGCGACGGa 5'
		||| | : |:||||||||
		Ref: 5' ggCCA-TCTCCTCCGCTGCCg 3'
miR-885-3p	FKBP1A	Query: 3' taGGTGATGTGGGGCGACGGa 5'
		||:| ||| |||||||||
		Ref: 5' ccCCGC-ACA-CCCGCTGCCt 3'
miR-885-3p	MEF2D	Query: 3' taggTGATGTGGGGCGACGGa 5'
		||| :||||||||||
		Ref: 5' agggACT--GCCCCGCTGCCc 3'
miR-885-5p	COPS2	Query: 3' tcTCCGTCCCATCACATTACCt 5'
		|||: | || |||||||
		Ref: 5' caAGGT-GACTACCGTAATGGa 3'
miR-885-5p	COPS2	Query: 3' tcTCCGTCCCATCACATTACCt 5'
		|| :| ||| |||||||
		Ref: 5' agAGTTAAATTAG-GTAATGGc 3'
miR-885-5p	FKBP1A	Query: 3' tctccgtcccATCACATTACCt 5'
		||| |||||||
		Ref: 5' atctgtctccTAGAGTAATGGa 3'
miR-103	ACTN2	Query: 3' agtatcGGGAC--A-TGTTACGACGa 5'
		|:||| | |::|||||||
		Ref: 5' atctttCTCTGCCTCATGATGCTGCt 3'
miR-103	FKBP1A	Query: 3' agtATCGGGA-CATGT-TACGACGa 5'
		||| ||| || |||||||
		Ref: 5' gccTAGGCCTCCCCCACATGCTGCc 3'
miR-103	FKBP1A	Query: 3' agtatcgggacATGTTACGACGa 5'
		|:| |||||||
		Ref: 5' acatctgaagaTGCCATGCTGCa 3'
miR-103	FKBP1A	Query: 3' agtATCGGGAC-----ATGT-TACGACGa 5'
		|||||: | | || |||||||
		Ref: 5' cccTAGCCTGGGAACCTCCATATGCTGCg 3'
miR-103	MEF2D	Query: 3' agtatcGGGACATGT---TACGACGa 5'
		| :|||||| |||||||
		Ref: 5' tttgcaCGTTGTACACATATGCTGCa 3'
miR-103	TMOD1	Query: 3' agtatcgggacatGTTACGACGa 5'
		| |||||||
		Ref: 5' cccgggagtggctCCATGCTGCa 3'
miR-107	ACTN2	Query: 3' actatcGGGAC--A-TGTTACGACGa 5'
		|:||| | |::|||||||
		Ref: 5' atctttCTCTGCCTCATGATGCTGCt 3'
miR-107	FKBP1A	Query: 3' actATCGGGA-CATGT-TACGACGa 5'
		||| ||| || |||||||
		Ref: 5' gccTAGGCCTCCCCCACATGCTGCc 3'
miR-107	FKBP1A	Query: 3' actatcgggacATGTTACGACGa 5'
		|:| |||||||
		Ref: 5' acatctgaagaTGCCATGCTGCa 3'
miR-107	FKBP1A	Query: 3' actATCGGGAC-----ATGT-TACGACGa 5'
		|||||: | | || |||||||
		Ref: 5' cccTAGCCTGGGAACCTCCATATGCTGCg 3'
miR-107	MEF2D	Query: 3' actatcGGGACATGT---TACGACGa 5'
		| :|||||| |||||||
		Ref: 5' tttgcaCGTTGTACACATATGCTGCa 3'
miR-107	TMOD1	Query: 3' actatcgggacatGTTACGACGa 5'
		| |||||||
		Ref: 5' cccgggagtggctCCATGCTGCa 3'
miR-126-5p	FKBP1A	Query: 3' gcgcatggttttcATTATTAc 5'
		|||||||
		Ref: 5' cagtaagatgtttTAATAATa 3'
miR-126-5p	MEF2D	Query: 3' gcgcATGGTTTTCATTATTAc 5'
		||::: || |||||||
		Ref: 5' agtaTATTGTAA-TAATAATg 3'
miR-126-5p	PLAGL1	Query: 3' gcGCAT--GGTTTT--CATTATTAc 5'
		|||| ||| :| |||||||
		Ref: 5' atCGTAAGCCATGATCATAATAATg 3'
miR-126-5p	SCN7A	Query: 3' gcgcATGGTTTTCATTATTAc 5'
		||:: | |||||||
		Ref: 5' aaaaTATTTTACTTAATAATc 3'
miR-129a-5p	ACTN2	Query: 3' cgTTCGGGTCTGGCGTTTTTc 5'
		| |:|| |::|||||||
		Ref: 5' agATGTCC-CATTGCAAAAAc 3'
miR-129a-5p	ANKRD1	Query: 3' cgTTCGGGT-CTGGCGTTTTTc 5'
		|| | | | :|||||||
		Ref: 5' cgAACCGAATGTGTGCAAAAAa 3'
miR-129a-5p	COPS2	Query: 3' cgtTCGGG-TC--TGGCGTTTTTc 5'
		||||| || |: |||||||
		Ref: 5' agcAGCCCAAGAAATAGCAAAAAg 3'
miR-129a-5p	COPS2	Query: 3' cgttcggGTCTGGCGTTTTTc 5'
		:| :: |||||||
		Ref: 5' attgagaTATGTAGCAAAAAa 3'
miR-129a-5p	FBXO40	Query: 3' cgtTCGGGT-CTGGCGTTTTTc 5'
		|||| | || |||||||
		Ref: 5' tttAGCCAACAACAGCAAAAAa 3'
miR-129a-5p	FKBP1A	Query: 3' cgtTCGGG-TC--TGGCGTTTTTc 5'
		:|||| || |: |||||||
		Ref: 5' agcGGCCCAAGAAATGGCAAAAAg 3'
miR-129a-5p	FKBP1A	Query: 3' cgttcgggTCTGGCGTTTTTc 5'
		| | |||||||
		Ref: 5' cggccataAAAAAGCAAAAAa 3'
miR-129a-5p	FOXN2	Query: 3' cgttcgggtcTGGCGTTTTTc 5'
		|| |||||||
		Ref: 5' agtgaatataACAGCAAAAAt 3'
miR-129a-5p	RB1	Query: 3' cgttcgggtctgGCGTTTTTc 5'
		:|||||||
		Ref: 5' ttcctgattttgTGCAAAAAa 3'
miR-129a-5p	TMOD1	Query: 3' cgttcgggTCTGG--CGTTTTTc 5'
		|||:| |||||||
		Ref: 5' atctcttgAGATCCAGCAAAAAt 3'
miR-129a-5p	TMOD1	Query: 3' cgtTCGGGTCTGGCGTTTTTc 5'
		:|:|:| :|||||||
		Ref: 5' gttGGTCTA---TGCAAAAAa 3'
miR-129b	ACTN2	Query: 3' cgTTCGGGTCTGGCGTTTTTc 5'
		| |:|| |::|||||||
		Ref: 5' agATGTCC-CATTGCAAAAAc 3'
miR-129b	ANKRD1	Query: 3' cgTTCGGGT-CTGGCGTTTTTc 5'
		|| | | | :|||||||
		Ref: 5' cgAACCGAATGTGTGCAAAAAa 3'
miR-129b	COPS2	Query: 3' cgtTCGGG-TC--TGGCGTTTTTc 5'
		||||| || |: |||||||
		Ref: 5' agcAGCCCAAGAAATAGCAAAAAg 3'
miR-129b	COPS2	Query: 3' cgttcggGTCTGGCGTTTTTc 5'
		:| :: |||||||
		Ref: 5' attgagaTATGTAGCAAAAAa 3'
miR-129b	FBXO40	Query: 3' cgtTCGGGT-CTGGCGTTTTTc 5'
		|||| | || |||||||
		Ref: 5' tttAGCCAACAACAGCAAAAAa 3'
miR-129b	FKBP1A	Query: 3' cgtTCGGG-TC--TGGCGTTTTTc 5'
		:|||| || |: |||||||
		Ref: 5' agcGGCCCAAGAAATGGCAAAAAg 3'
miR-129b	FKBP1A	Query: 3' cgttcgggTCTGGCGTTTTTc 5'
		| | |||||||
		Ref: 5' cggccataAAAAAGCAAAAAa 3'
miR-129b	FOXN2	Query: 3' cgttcgggtcTGGCGTTTTTc 5'
		|| |||||||
		Ref: 5' agtgaatataACAGCAAAAAt 3'
miR-129b	RB1	Query: 3' cgttcgggtctgGCGTTTTTc 5'
		:|||||||
		Ref: 5' ttcctgattttgTGCAAAAAa 3'
miR-129b	TMOD1	Query: 3' cgttcgggTCTGG--CGTTTTTc 5'
		|||:| |||||||
		Ref: 5' atctcttgAGATCCAGCAAAAAt 3'
miR-129b	TMOD1	Query: 3' cgtTCGGGTCTGGCGTTTTTc 5'
		:|:|:| :|||||||
		Ref: 5' gttGGTCTA---TGCAAAAAa 3'
miR-1306-5p	LEMD2	Query: 3' acctgcaaacgTCCCCTCCACc 5'
		||||||||||
		Ref: 5' cctgaccccagAGGGGAGGTGc 3'
miR-1306-5p	LEMD2	Query: 3' acctgcaaaCGTCC--CCTCCACc 5'
		||||| |||||||
		Ref: 5' ccttggaggGCAGGGTGGAGGTGc 3'
miR-1306-5p	MAFF	Query: 3' acctgcaaacgtccCCTCCACc 5'
		|||||||
		Ref: 5' agaaaggggaccaaGGAGGTGa 3'
miR-1306-5p	MEF2D	Query: 3' acctgcaaacGTCCCCTCCACc 5'
		| |||||||||
		Ref: 5' gcaggaaggaCTGGGGAGGTGg 3'
miR-1306-5p	MEF2D	Query: 3' acCTGCAAACGTCC----CCTCCACc 5'
		|: || |||| |||||||
		Ref: 5' ggGGGGTGGACAGGCCATGGAGGTGc 3'
miR-133a-5p	FOXN2	Query: 3' taaaccaagGTAAAATGGTCGa 5'
		:|| ||||||||
		Ref: 5' ttctaaaaaTATATTACCAGCa 3'
miR-133a-5p	IFRD1	Query: 3' taaaccaaGGTAAAATGGTCGa 5'
		||| ||||||||
		Ref: 5' gcatttagCCA--TTACCAGCc 3'
miR-133a-5p	SCN7A	Query: 3' taaACCAAGGTAAAATGGTCGa 5'
		| || | :| |||||||
		Ref: 5' aaaTTGTACAGTGCTACCAGCc 3'
miR-139-5p	ACTN2	Query: 3' gaccTCTGTGCACGTGACATCt 5'
		|||: | :|||||||
		Ref: 5' ccccAGATCAATCTACTGTAGa 3'
miR-143-3p	FKBP1A	Query: 3' ctcgaTGTCACGA-AGTAGAGt 5'
		||: || |||||||
		Ref: 5' acagaACGTCACTATCATCTCa 3'
miR-143-3p	MEF2D	Query: 3' ctcgatgtcaCGAAGTAGAGt 5'
		|| |||||||
		Ref: 5' gcctgggaacGCCTCATCTCc 3'
miR-143-3p	MYBPC1	Query: 3' ctCGATGT--CACGA-AGTAGAGt 5'
		| |||| | || |||||||
		Ref: 5' aaGGTACACTATACTATCATCTCg 3'
miR-143-3p	TPM3	Query: 3' ctCGATGT-CACGAAGTAGAGt 5'
		|| |:| | |||||||
		Ref: 5' taGCCATATGAAACTCATCTCa 3'
miR-143-3p	TPM4	Query: 3' ctcgatgtcacGAAGTAGAGt 5'
		| |||||||
		Ref: 5' agctggcctaaCATCATCTCc 3'
miR-143-5p	FKBP1A	Query: 3' ggtCTCTACGTCGTGACGTGg 5'
		|: | ||| ||||||||
		Ref: 5' aatGGCAGGCATCACTGCACc 3'
miR-143-5p	FKBP1A	Query: 3' ggtcTCTAC-GTCGTGACGTGg 5'
		:| || | ||||||||
		Ref: 5' ttgtGGCTGTCCCCACTGCACa 3'
miR-143-5p	IFRD1	Query: 3' ggtctcTACGTCGTGACGTGg 5'
		||| | |||||||
		Ref: 5' ttttctATGGTG-ACTGCACc 3'
miR-143-5p	MEF2D	Query: 3' ggTCTCTACGT-CG-TGACGTGg 5'
		||:|:|||: |: |||||||
		Ref: 5' agAGGGGTGCGTGTGACTGCACa 3'
miR-145-5p	FKBP1A	Query: 3' ttcCCTAAG-GACCCTTTTGACCTg 5'
		| | || || || |||||||
		Ref: 5' cccGCAGTCTCTAGG--AACTGGAa 3'
miR-145-5p	TMOD1	Query: 3' ttccctaaggaccctTTTGACCTg 5'
		:|||||||
		Ref: 5' gctgaccacgcctttGAACTGGAc 3'
miR-145-5p	TMOD4	Query: 3' ttccctAAGGACCCTTTTGACCTg 5'
		| ||| |||||||
		Ref: 5' gtacccTCCCTTTATCAACTGGAg 3'
miR-145-5p	TPM4	Query: 3' ttcccTAAGGACCCTTTTGACCTg 5'
		| ||||| ||||||||
		Ref: 5' aagaaACTCCTGATTAAACTGGAt 3'
miR-148a-3p	ACTN2	Query: 3' tgttTCAAGACATCACGTGACt 5'
		|| | | || |||||||
		Ref: 5' ccccAGGTATCTAATGCACTGc 3'
miR-148a-3p	FKBP1A	Query: 3' tgtttCAAGACATCACGTGACt 5'
		|||| |: |||||||
		Ref: 5' cccctGTTCATTGCTGCACTGt 3'
miR-148a-3p	FKBP1A	Query: 3' tgTTTCAAGACATC--ACGTGACt 5'
		||| || || |||||||
		Ref: 5' ttAAACTT-AAAAGCCTGCACTGc 3'
miR-148a-3p	SCN7A	Query: 3' tgTTTCAAGACATCACGTGACt 5'
		||| |: || |||||||
		Ref: 5' gcAAA--TTAGT-TTGCACTGa 3'
miR-148b-3p	ACTN2	Query: 3' tgttTCAAGACACTACGTGACt 5'
		|| | | | ||||||||
		Ref: 5' ccccAGGTATCTAATGCACTGc 3'
miR-148b-3p	FKBP1A	Query: 3' tgtttCAAGACACTACGTGACt 5'
		|||| || |||||||
		Ref: 5' cccctGTTCATTGCTGCACTGt 3'
miR-148b-3p	FKBP1A	Query: 3' tgTTTCAAGACAC-TACGTGACt 5'
		||| || | |||||||
		Ref: 5' ttAAACTTAAAAGCCTGCACTGc 3'
miR-148b-3p	SCN7A	Query: 3' tgTTTCAAGACACTACGTGACt 5'
		||| |: || |||||||
		Ref: 5' gcAAA--TTAGT-TTGCACTGa 3'
miR-149	CLCN1	Query: 3' cccTCACTTCTGTGCCTCGGTCt 5'
		| ||:|| || ||||||||
		Ref: 5' aacATTGGAG-CA-GGAGCCAGa 3'
miR-149	FKBP1A	Query: 3' cccTCACTTCTGTGCCTCGGTCt 5'
		|| ||: ||||||||||
		Ref: 5' gaaAGCCCAGGGACGGAGCCAGc 3'
miR-149	SCN7A	Query: 3' ccCTCACTTCTGTGCCTCGGTCt 5'
		|:| | |::| |||||||
		Ref: 5' taGGGGCATGGTA-AGAGCCAGt 3'
miR-149	TMOD1	Query: 3' ccCTCACT--TCTGTGCCTCGGTCt 5'
		|:|| | ||| ::||||||||
		Ref: 5' caGGGTAACCAGAGGTGGAGCCAGg 3'
miR-151-5p	FKBP1A	Query: 3' tgatctgacactcGAGGAGCt 5'
		|||||||
		Ref: 5' gctcttcccctttCTCCTCGt 3'
miR-152	ACTN2	Query: 3' ggtTCAAGACAGTACGTGACt 5'
		|| | | | ||||||||
		Ref: 5' cccAGGTATCTAATGCACTGc 3'
miR-152	FKBP1A	Query: 3' ggttCAAGACAGTACGTGACt 5'
		|||| | |||||||
		Ref: 5' ccctGTTCATTGCTGCACTGt 3'
miR-152	FKBP1A	Query: 3' ggttcaagacaGTACGTGACt 5'
		| |||||||
		Ref: 5' aaacttaaaagCCTGCACTGc 3'
miR-152	SCN7A	Query: 3' ggTTCAAGACAGTACGTGACt 5'
		|| || ||: |||||||
		Ref: 5' gcAAATT-AGTT-TGCACTGa 3'
miR-181a	CLCN1	Query: 3' ttGAGTGGCTGTCGCAACTTACAa 5'
		|| :||| :| |||||||
		Ref: 5' gaCTGGCCG-TAAAAATGAATGTt 3'
miR-181a	COPS2	Query: 3' ttgaGTGGCTGTCG--CAACTTACAa 5'
		||: |||||| |||||||
		Ref: 5' agaaCATAGACAGCTAAATGAATGTt 3'
miR-181a	COPS2	Query: 3' ttgagtggcTGTCG---CAACTTACAa 5'
		:|||| ||||||||
		Ref: 5' aatggagacGCAGCTCATTTGAATGTa 3'
miR-181a	COPS2	Query: 3' ttGAGTGGCTG-TCGCAACTTACAa 5'
		||: ||: || |||||||
		Ref: 5' ttCTTTAAGATGAGATATGAATGTa 3'
miR-181a	FBXO40	Query: 3' ttGAGT-GGCTGTCG-CAACTTACAa 5'
		| || | || | | | |||||||
		Ref: 5' gtCCCAGCAGAGATCAGCTGAATGTg 3'
miR-181a	FKBP1A	Query: 3' ttgagtggctgtcgcaACTTACAa 5'
		|||||||
		Ref: 5' ctatttttttccccacTGAATGTt 3'
miR-181a	MYF6	Query: 3' ttgagTGGCTGTCGC---AACTTACAa 5'
		||:| :||:| ||||||||
		Ref: 5' tcgcaACTGTTAGTGGGATTGAATGTa 3'
miR-181b	CLCN1	Query: 3' ttGGGTGGCTGTCGTTACTTACAa 5'
		|: :||| :| |||||||||
		Ref: 5' gaCTGGCCG-TAAAAATGAATGTt 3'
miR-181b	COPS2	Query: 3' ttggGTGGCTGTCG--TTACTTACAa 5'
		||: |||||| |||||||||
		Ref: 5' agaaCATAGACAGCTAAATGAATGTt 3'
miR-181b	COPS2	Query: 3' ttgggtggCTG-TCGTTACTTACAa 5'
		||: || ||||||||
		Ref: 5' ttctttaaGATGAGATATGAATGTa 3'
miR-181b	COPS2	Query: 3' ttgggtggcTGTC--GT-TACTTACAa 5'
		:||| || |||||||
		Ref: 5' aatggagacGCAGCTCATTTGAATGTa 3'
miR-181b	FBXO40	Query: 3' ttGGGT-GGCTGTCGTT-ACTTACAa 5'
		|||| | || | ||: |||||||
		Ref: 5' gtCCCAGCAGAGATCAGCTGAATGTg 3'
miR-181b	FKBP1A	Query: 3' ttgggtggctgtcGTTACTTACAa 5'
		|| |||||||
		Ref: 5' ctatttttttcccCACTGAATGTt 3'
miR-181b	MYF6	Query: 3' ttgGGTGGCTGTCGTTACTTACAa 5'
		|:::: :::| | |||||||
		Ref: 5' caaCTGTTAGTGGGATTGAATGTa 3'
miR-181d-5p	CLCN1	Query: 3' ttGGGTGGCTGTTGTTACTTACAa 5'
		|: :||| :|| |||||||||
		Ref: 5' gaCTGGCCG-TAAAAATGAATGTt 3'
miR-181d-5p	COPS2	Query: 3' ttggGTGGCTGTTG--TTACTTACAa 5'
		||: ||||:| |||||||||
		Ref: 5' agaaCATAGACAGCTAAATGAATGTt 3'
miR-181d-5p	COPS2	Query: 3' ttgggtggCTGTTGT-TACTTACAa 5'
		||::| | ||||||||
		Ref: 5' ttctttaaGATGAGATATGAATGTa 3'
miR-181d-5p	COPS2	Query: 3' ttggGTGGCTGTTGTTACTTACAa 5'
		|:| | : |: |||||||
		Ref: 5' gagaCGCAGCTCAT-TTGAATGTa 3'
miR-181d-5p	FBXO40	Query: 3' ttGGGT-GGCTGTTGTT-ACTTACAa 5'
		|||| | || | ||: |||||||
		Ref: 5' gtCCCAGCAGAGATCAGCTGAATGTg 3'
miR-181d-5p	FKBP1A	Query: 3' ttgggtggctgttGTTACTTACAa 5'
		|| |||||||
		Ref: 5' ctatttttttcccCACTGAATGTt 3'
miR-181d-5p	MYF6	Query: 3' ttgGGTGGCTGTTGTTACTTACAa 5'
		|:::: :::: | |||||||
		Ref: 5' caaCTGTTAGTGGGATTGAATGTa 3'
miR-186	ACTN2	Query: 3' ttcggGTTTTCCT----CT-TAAGAAAc 5'
		|||||||| || |||||||
		Ref: 5' tgtggCAAAAGGAATGGGACATTCTTTt 3'
miR-186	COPS2	Query: 3' ttCGGGTTTTCC---TCTTAAGAAAc 5'
		||:: ||||| | ||||||||
		Ref: 5' atGCTTTAAAGGAATAAAATTCTTTt 3'
miR-186	FKBP1A	Query: 3' ttCGGGTTTTCCTCT-TAAGAAAc 5'
		|:||||: | |||||||
		Ref: 5' agGTCCAAGCCTTCAGATTCTTTa 3'
miR-186	FOXN2	Query: 3' ttcgggttttcctcTTAAGAAAc 5'
		||||||||
		Ref: 5' atactcttctacttAATTCTTTc 3'
miR-186	H3F3A	Query: 3' ttcgggttttcctctTAAGAAAc 5'
		|||||||
		Ref: 5' gatgggaaacatttcATTCTTT- 3'
miR-186	IFRD1	Query: 3' ttcggGTTTTCCTC-TTAAGAAAc 5'
		:| :| ||| ||||||||
		Ref: 5' tagaaTACGATGAGAAATTCTTTa 3'
miR-186	PLAGL1	Query: 3' ttcGGGTT-TTC-CTCTTAAGAAAc 5'
		:::|| ||| || |||||||
		Ref: 5' aaaTTTAATAAGCAAGTATTCTTTa 3'
miR-186	RB1	Query: 3' ttcgggttttcctcTTAAGAAAc 5'
		||||||||
		Ref: 5' tgtaagaatttattAATTCTTTa 3'
miR-186	TMOD1	Query: 3' ttcgggtTTTCCTCTTAAGAAAc 5'
		|:| | |||||||
		Ref: 5' acgagacAGATCAACATTCTTTa 3'
miR-186	TMOD1	Query: 3' ttcgggttttcctctTAAGAAAc 5'
		|||||||
		Ref: 5' aactgtcctttttttATTCTTTt 3'
miR-196b-5p	TMOD1	Query: 3' gggtTGTTGTCCTTTGATGGAt 5'
		|||: | ||||||||
		Ref: 5' gcttACAGAATTCAACTACCTg 3'
miR-199a-3p	ATF3	Query: 3' attggttACACGTC--TGATGACa 5'
		||| ||| |||||||
		Ref: 5' gctgttcTGTACAGGAACTACTGt 3'
miR-199a-3p	COPS2	Query: 3' atTGGTTACACG--TCTGATGACa 5'
		| :|:||| : |||||||||
		Ref: 5' tcAATAGTGTATCAAGACTACTGa 3'
miR-199a-3p	COPS2	Query: 3' attggTTACACG-TCTGATGACa 5'
		|||| || | |||||||
		Ref: 5' ctgggAATG-GCAAAACTACTGt 3'
miR-199a-3p	RB1	Query: 3' attgGTTACACGTCTGATGACa 5'
		:| ||| || |||||||
		Ref: 5' gagaTACTGT-CATACTACTGa 3'
miR-199a-5p	ACTN2	Query: 3' cttgtcCATCAGACTTGTGACCc 5'
		| ||| ||||||||
		Ref: 5' actgctGCAGTGACAACACTGGa 3'
miR-199a-5p	ATF3	Query: 3' cttgTCCATCAG-ACTTGTGACCc 5'
		|| |||| | |||||||
		Ref: 5' tgtgAGAAAGTCATTCACACTGGc 3'
miR-199a-5p	RB1	Query: 3' ctTGTCCATCAGACTTGTGACCc 5'
		||| |:|||| |||||||
		Ref: 5' caACA--TGGTCT-TACACTGGc 3'
miR-199a-5p	TPM3	Query: 3' cttgTCCATCAGACTTGTGACCc 5'
		:||| | | |||||||
		Ref: 5' tttgGGGTTG-GGGCACACTGGt 3'
miR-199b-3p	ACTN2	Query: 3' ttGGTTACACGTCTGATGACAt 5'
		|| | | || |||||||
		Ref: 5' tcCCCA-GATCAATCTACTGTa 3'
miR-199b-3p	ATF3	Query: 3' ttggttACACGTC--TGATGACAt 5'
		||| ||| ||||||||
		Ref: 5' ctgttcTGTACAGGAACTACTGTg 3'
miR-199b-3p	ATF3	Query: 3' ttggttacacGTCTGATGACAt 5'
		| |:|||||||
		Ref: 5' catgaggactCTGGCTACTGTc 3'
miR-199b-3p	COPS2	Query: 3' ttggTTACACG-TCTGATGACAt 5'
		|||| || | ||||||||
		Ref: 5' tgggAATG-GCAAAACTACTGTc 3'
miR-199b-3p	COPS2	Query: 3' ttgGTTACACGTCTGATGACAt 5'
		|| || || :|||||||
		Ref: 5' ataCACTG-ACATGCTACTGTt 3'
miR-199b-3p	MEF2D	Query: 3' ttggttacacgtCTGATGACAt 5'
		|:|||||||
		Ref: 5' gccttccctcttGGCTACTGTa 3'
miR-23a	FOXN2	Query: 3' ccTTTAGGGACCGTTACACTa 5'
		:|:| ::| :|||||||
		Ref: 5' taGAGTATTT--TAATGTGAt 3'
miR-23a	PLAGL1	Query: 3' cctttagggaccGTTACACTa 5'
		||||||||
		Ref: 5' cacaggatgctaCAATGTGAg 3'
miR-23a	TMOD1	Query: 3' cctTTAGGGACC-GTTACACTa 5'
		|| |: ||| :|||||||
		Ref: 5' tatAAACTATGGTTAATGTGAa 3'
miR-23a	TPM3	Query: 3' ccTTTAGGG-ACCGTTACACTa 5'
		|| |::: || |||||||
		Ref: 5' acAACTTTTAAGGGAATGTGAg 3'
miR-23b	FOXN2	Query: 3' acCATTAGGGACCGTTACACTa 5'
		|||: : | :|||||||
		Ref: 5' aaGTAGAGTATTTTAATGTGAt 3'
miR-23b	PLAGL1	Query: 3' accattagggaccGTTACACTa 5'
		||||||||
		Ref: 5' ccacaggatgctaCAATGTGAg 3'
miR-23b	TMOD1	Query: 3' accATTAGGGACC-GTTACACTa 5'
		||| |: ||| :|||||||
		Ref: 5' ttaTAAACTATGGTTAATGTGAa 3'
miR-23b	TPM3	Query: 3' accaTTAGGGA--CCGTTACACTa 5'
		|| :::| || |||||||
		Ref: 5' gaacAACTTTTAAGGGAATGTGAg 3'
miR-27a	ANKRD1	Query: 3' cgcctTGAATCGGTGACACTt 5'
		|:||| ::|||||||
		Ref: 5' tatttATTTATTTACTGTGAt 3'
miR-27a	ANKRD1	Query: 3' cgccttgaaTCGGTGACACTt 5'
		||: |||||||
		Ref: 5' aaaaagaaaAGTGACTGTGAa 3'
miR-27a	IFRD1	Query: 3' cgccTTGAAT-CGGTGACACTt 5'
		|: ||| :||||||||
		Ref: 5' gtacAGATTATTTCACTGTGAc 3'
miR-27a	RB1	Query: 3' cgccttgaatcggTGACACTt 5'
		|||||||
		Ref: 5' tttctagggcatgACTGTGAt 3'
miR-27b-3p	ANKRD1	Query: 3' cgtctTGAATCGGTGACACTt 5'
		|:||| ::|||||||
		Ref: 5' tatttATTTATTTACTGTGAt 3'
miR-27b-3p	ANKRD1	Query: 3' cgTCTTGAATCGGTGACACTt 5'
		|||| ||: |||||||
		Ref: 5' aaAGAA--AAGTGACTGTGAa 3'
miR-27b-3p	IFRD1	Query: 3' cgTCTTGAAT-CGGTGACACTt 5'
		| |: ||| :||||||||
		Ref: 5' gtACAGATTATTTCACTGTGAc 3'
miR-27b-3p	RB1	Query: 3' cgTCTTGAATCGGTGACACTt 5'
		||::| |: |||||||
		Ref: 5' ctAGGGCATG---ACTGTGAt 3'
miR-28-3p	FBXO40	Query: 3' agGTCCTCGAGTGTTAGATCAc 5'
		|| | |:|: ||||||||
		Ref: 5' tcCATGTGTTTTGAATCTAGTc 3'
miR-28-3p	IFRD1	Query: 3' aggtccTCGAGTGTTAGATCAc 5'
		||| ||| |||||||
		Ref: 5' attaccAGC-CACTATCTAGTt 3'
miR-28-3p	RB1	Query: 3' aggtccTCGAGTGTTAGATCAc 5'
		||: | | |||||||
		Ref: 5' tcataaAGTAC-CCATCTAGTt 3'
miR-296-5p	ATF3	Query: 3' tgtcctaaCCCCCCCCGGGAg 5'
		|| | |||||||
		Ref: 5' gccatcaaGGCGAGGGCCCTc 3'
miR-296-5p	BIN1	Query: 3' tgtcctaACCC-CCCCCGGGAg 5'
		|||| |||||||
		Ref: 5' gcttgccTGGGCAAGGGCCCTc 3'
miR-296-5p	CLCN1	Query: 3' tgtcctaACCCCCCCCGGGAg 5'
		|||| |||||||
		Ref: 5' tacgcgcTGGGAAGGGCCCTt 3'
miR-296-5p	MAFF	Query: 3' tgtcctaacCCCCCCCGGGAg 5'
		|| |||||||
		Ref: 5' tcctgggaaGGCTGGGCCCTa 3'
miR-30a-5p	COPS2	Query: 3' gaaggtcagctccTACAAATGt 5'
		||||||||
		Ref: 5' tgagctttcctaaATGTTTACt 3'
miR-30a-5p	FKBP1A	Query: 3' gaAGGTCAGCTCCT-ACAAATGt 5'
		|:|| | | | |||||||
		Ref: 5' tgTTCATTGCTGCACTGTTTACa 3'
miR-30a-5p	IFRD1	Query: 3' gaaggtcagctccTACAAATGt 5'
		:|||||||
		Ref: 5' tgtgattaattctGTGTTTACc 3'
miR-30a-5p	IFRD1	Query: 3' gaaggtcagctcctACAAATGt 5'
		|||||||
		Ref: 5' aaaattgaatatttTGTTTACa 3'
miR-30a-5p	MEF2D	Query: 3' gaaggtcaGCTCCTACAAATGt 5'
		| || :|||||||
		Ref: 5' caggtgccCAAGTGTGTTTACa 3'
miR-30a-5p	MEF2D	Query: 3' gaaggtcagCTCCTACAAATGt 5'
		| | :|||||||
		Ref: 5' tgcgcctggGTGTGTGTTTACa 3'
miR-30a-5p	RB1	Query: 3' gaaggtcagctcctACAAATGt 5'
		|||||||
		Ref: 5' actctccccaattcTGTTTACg 3'
miR-30a-5p	SCN7A	Query: 3' gaaggtcagctcctACAAATGt 5'
		|||||||
		Ref: 5' acttaataatcaatTGTTTACa 3'
miR-30b-5p	COPS2	Query: 3' tcgactcacatccTACAAATGt 5'
		||||||||
		Ref: 5' tgagctttcctaaATGTTTACt 3'
miR-30b-5p	FKBP1A	Query: 3' tcGACTCACATCCT-ACAAATGt 5'
		:| | || | | |||||||
		Ref: 5' tgTTCATTGCTGCACTGTTTACa 3'
miR-30b-5p	IFRD1	Query: 3' tcgACTCA-CATCCTACAAATGt 5'
		||| | | :|||||||
		Ref: 5' atgTGATTAATTCTGTGTTTACc 3'
miR-30b-5p	IFRD1	Query: 3' tcgactcacATCCTACAAATGt 5'
		|| |||||||
		Ref: 5' aaaattgaaTATTTTGTTTACa 3'
miR-30b-5p	MEF2D	Query: 3' tcGACTCACATCCTACAAATGt 5'
		|||:|||| :|||||||
		Ref: 5' gcCTGGGTGT---GTGTTTACa 3'
miR-30b-5p	MEF2D	Query: 3' tcgactcacaTCCTACAAATGt 5'
		|| :|||||||
		Ref: 5' caggtgcccaAGTGTGTTTACa 3'
miR-30b-5p	RB1	Query: 3' tcgactcacatcctACAAATGt 5'
		|||||||
		Ref: 5' actctccccaattcTGTTTACg 3'
miR-30b-5p	SCN7A	Query: 3' tcgactcacatcctACAAATGt 5'
		|||||||
		Ref: 5' acttaataatcaatTGTTTACa 3'
miR-30c-5p	COPS2	Query: 3' cgACTCTCA--CATCCTACAAATGt 5'
		|||| | || ||||||||
		Ref: 5' tgTGAGCTTTCCTA-AATGTTTACt 3'
miR-30c-5p	FKBP1A	Query: 3' cgactcTCACATCCT-ACAAATGt 5'
		| || | | |||||||
		Ref: 5' ctgttcATTGCTGCACTGTTTACa 3'
miR-30c-5p	IFRD1	Query: 3' cgACTCTCA-CATCCTACAAATGt 5'
		|| || | | :|||||||
		Ref: 5' taTGTGATTAATTCTGTGTTTACc 3'
miR-30c-5p	IFRD1	Query: 3' cgacTCTCAC--ATCCTACAAATGt 5'
		| | || || |||||||
		Ref: 5' agcaAAATTGAATATTTTGTTTACa 3'
miR-30c-5p	MEF2D	Query: 3' cgactCTCACATCCTACAAATGt 5'
		|:|||| :|||||||
		Ref: 5' cgcctGGGTGT---GTGTTTACa 3'
miR-30c-5p	MEF2D	Query: 3' cgactctcacaTCCTACAAATGt 5'
		|| :|||||||
		Ref: 5' acaggtgcccaAGTGTGTTTACa 3'
miR-30c-5p	RB1	Query: 3' cgactctcacatcctACAAATGt 5'
		|||||||
		Ref: 5' aactctccccaattcTGTTTACg 3'
miR-30c-5p	SCN7A	Query: 3' cgactctcacatcctACAAATGt 5'
		|||||||
		Ref: 5' tacttaataatcaatTGTTTACa 3'
miR-30d	COPS2	Query: 3' tcgaaggtcagccccTACAAATGt 5'
		||||||||
		Ref: 5' tgtgagctttcctaaATGTTTACt 3'
miR-30d	FKBP1A	Query: 3' tcGA-AGGTCA-GCCCCTACAAATGt 5'
		|| |:|| | | | |||||||
		Ref: 5' ccCTGTTCATTGCTGCACTGTTTACa 3'
miR-30d	IFRD1	Query: 3' tcgaaggtcagccccTACAAATGt 5'
		:|||||||
		Ref: 5' tatgtgattaattctGTGTTTACc 3'
miR-30d	IFRD1	Query: 3' tcgaaggtcagcccctACAAATGt 5'
		|||||||
		Ref: 5' gcaaaattgaatatttTGTTTACa 3'
miR-30d	MEF2D	Query: 3' tcGAAGGTCAGCCC-C-TACAAATGt 5'
		| | |: :||| | :|||||||
		Ref: 5' tgCGTGCGCCTGGGTGTGTGTTTACa 3'
miR-30d	MEF2D	Query: 3' tcgaaggtcagccCCTACAAATGt 5'
		| :|||||||
		Ref: 5' cacaggtgcccaaGTGTGTTTACa 3'
miR-30d	RB1	Query: 3' tcgaaggtcagcccctACAAATGt 5'
		|||||||
		Ref: 5' gaactctccccaattcTGTTTACg 3'
miR-30d	SCN7A	Query: 3' tcgaaggtcagcccctACAAATGt 5'
		|||||||
		Ref: 5' ttacttaataatcaatTGTTTACa 3'
miR-320	CHRNB1	Query: 3' aagcgGGAGAGTTGGGTCGAAAa 5'
		|:|| : :||||||||
		Ref: 5' ataagCTTCAGGTTCCAGCTTTg 3'
miR-320	COPS2	Query: 3' aagcGGGAGAGTTGGGTCGAAAa 5'
		||| || |||||||
		Ref: 5' ttatCCCAAGAAAAACAGCTTTa 3'
miR-320	FKBP1A	Query: 3' aagcgggagagTTGGGTCGAAAa 5'
		:| :|||||||
		Ref: 5' tggagctggagGAATCAGCTTTc 3'
miR-320	FOXN2	Query: 3' aaGCGGG-AGAGTTGGGTCGAAAa 5'
		| ||| |:|::|| |||||||
		Ref: 5' aaCACCCATTTTGACACAGCTTTt 3'
miR-320	MYBPC1	Query: 3' aagcGGGAGAG---TTGGGTCGAAAa 5'
		:| |||| |||||||||||
		Ref: 5' actaTCATCTCGAAAACCCAGCTTTc 3'
miR-320	TPM3	Query: 3' aagCGGGA-GAGTT---GGGTCGAAAa 5'
		|: || :|||: ::|||||||
		Ref: 5' aaaGTGCTGTTCAGGTTTTCAGCTTTa 3'
miR-320	TPM4	Query: 3' aaGCGGGAGAGTT----G-GGTCGAAAa 5'
		| :::|:|||| | ||||||||
		Ref: 5' tcCTTTTTTTCAAGTGGCACCAGCTTTt 3'
miR-339	ACTN2	Query: 3' actCGAGGACCTCCTGTCCCt 5'
		| | || || |||||||
		Ref: 5' agtGATACTTGATGACAGGGg 3'
miR-339	CLCN1	Query: 3' actcgaggaccTC-CTGTCCCt 5'
		|| |||||||
		Ref: 5' cttcccaagccAGTGACAGGGg 3'
miR-339	FKBP1A	Query: 3' actcgaggACC-TCCTGTCCCt 5'
		||| |||||||||
		Ref: 5' tggaaataTGGAAGGACAGGGg 3'
miR-339	MEF2D	Query: 3' actcgaGGACCTCCTGTCCCt 5'
		|||||: |||||||
		Ref: 5' gcctggCCTGGGTGACAGGGg 3'
miR-339	TPM4	Query: 3' acTCG-AGGACCTCCTGTCCCt 5'
		||: |::| | |||||||
		Ref: 5' ggAGTATTTTATA-GACAGGGc 3'
miR-339-5p	ACTN2	Query: 3' caCTCGAGGACCTCCTGTCCCt 5'
		| | | || || |||||||
		Ref: 5' taGTGATACTTGATGACAGGGg 3'
miR-339-5p	CLCN1	Query: 3' cactcgaggaccTC-CTGTCCCt 5'
		|| |||||||
		Ref: 5' ccttcccaagccAGTGACAGGGg 3'
miR-339-5p	FKBP1A	Query: 3' caCTCGAGGACCTCCTGTCCCt 5'
		|| | : | |||||||||
		Ref: 5' tgGAAATATGGAAGGACAGGGg 3'
miR-339-5p	MEF2D	Query: 3' cactcgaGGACCTCCTGTCCCt 5'
		|||||: |||||||
		Ref: 5' ggcctggCCTGGGTGACAGGGg 3'
miR-339-5p	TPM4	Query: 3' caCTCG-AGGACCTCCTGTCCCt 5'
		|||: |::| | |||||||
		Ref: 5' tgGAGTATTTTATA-GACAGGGc 3'
miR-374b-5p	COPS2	Query: 3' gtgaatcgtccaacATAATATa 5'
		|||||||
		Ref: 5' ataaaaaactaagaTATTATAa 3'
miR-374b-5p	FKBP1A	Query: 3' gtgAATC-GTCCAACATAATATa 5'
		||:| || | |||||||
		Ref: 5' aagTTGGAAAGATCATATTATAt 3'
miR-374b-5p	FKBP1A	Query: 3' gtgaatcgtccaACATAATATa 5'
		| |||||||
		Ref: 5' atgaaatttttaTCTATTATAt 3'
miR-374b-5p	FOXN2	Query: 3' gtgaatcgtccaacATAATATa 5'
		|||||||
		Ref: 5' tgtataaaattaaaTATTATAt 3'
miR-374b-5p	LMOD2	Query: 3' gtgaatcgtccaacATAATATa 5'
		|||||||
		Ref: 5' ctaaatattaaaaaTATTATAt 3'
miR-374b-5p	MEF2D	Query: 3' gtgAATCGTCCAACATAATATa 5'
		||| :| | |||||||
		Ref: 5' ataTTATTA-TTATTATTATAt 3'
miR-374b-5p	MEF2D	Query: 3' gtgaatcgtccaacATAATATa 5'
		|||||||
		Ref: 5' ttgtgtataattatTATTATAt 3'
miR-374b-5p	SCN7A	Query: 3' gtgaatcgtccaacATAATATa 5'
		|||||||
		Ref: 5' gattgagccttaacTATTATAa 3'
miR-374b-5p	TMOD1	Query: 3' gtGAAT--CGTCCAACATAATATa 5'
		|||| | || |||||||
		Ref: 5' atCTTACTGAAGACGATATTATAg 3'
miR-374b-5p	TPM4	Query: 3' gtgaatcgtCCAACATAATATa 5'
		|| | |||||||
		Ref: 5' gcacattttGGCTTTATTATAt 3'
miR-423-5p	CLCN1	Query: 3' tttcagagcgagaGACGGGGAGt 5'
		| |||||||
		Ref: 5' accccccaatagcCAGCCCCTCc 3'
miR-423-5p	MAFF	Query: 3' ttTC-AGAGCGAGAGACGGGGAGt 5'
		|| |: ||| | |||||||
		Ref: 5' tcAGCTTGCGCCAGCGGCCCCTCt 3'
miR-423-5p	MEF2D	Query: 3' tttcAGAGCGAGAGACGGGGAGt 5'
		|:|| : | |||||||
		Ref: 5' tcccTTTCCTCCAAGGCCCCTCt 3'
miR-423-5p	MEF2D	Query: 3' ttTCAGAGCGAGAGACGGGGAGt 5'
		|||| : | ||||||||
		Ref: 5' ggAGTCAT-CCGAATGCCCCTCt 3'
miR-423-5p	TPM4	Query: 3' tttcagagcgaGAGACGGGGAGt 5'
		|||||||||||
		Ref: 5' gctgaaacatcCTCTGCCCCTCa 3'
miR-4334-3p	ACTN2	Query: 3' ctCGAGGACCTCCTGTCCCt 5'
		| | || || |||||||
		Ref: 5' gtGATACTTGATGACAGGGg 3'
miR-4334-3p	CLCN1	Query: 3' ctcgaggaccTC-CTGTCCCt 5'
		|| |||||||
		Ref: 5' ttcccaagccAGTGACAGGGg 3'
miR-4334-3p	FKBP1A	Query: 3' ctcgaggACC-TCCTGTCCCt 5'
		||| |||||||||
		Ref: 5' ggaaataTGGAAGGACAGGGg 3'
miR-4334-3p	MEF2D	Query: 3' ctcgaGGACCTCCTGTCCCt 5'
		|||||: |||||||
		Ref: 5' cctggCCTGGGTGACAGGGg 3'
miR-4334-3p	TPM4	Query: 3' ctcgAGGACCTCCTGTCCCt 5'
		|::| | |||||||
		Ref: 5' agtaTTTTATA-GACAGGGc 3'
miR-450c-3p	CHRNB1	Query: 3' tgcttacgttttacAAGGGTTa 5'
		|||||||
		Ref: 5' ggcgcagctccaacTTCCCAAa 3'
miR-450c-3p	CLCN1	Query: 3' tgcTTACGTTTTACAAGGGTTa 5'
		:|| | | |||||||
		Ref: 5' tcaGATCCTTATCCTTCCCAAg 3'
miR-450c-3p	FKBP1A	Query: 3' tgctTAC-GTTTTACAAGGGTTa 5'
		||| | | | |||||||
		Ref: 5' ggttATGTCTTATTTTTCCCAAa 3'
miR-450c-3p	FOXN2	Query: 3' tgcTTACGTTTTA-CAAGGGTTa 5'
		:| |: | :| |||||||
		Ref: 5' agaGAGGTTATGTACTTCCCAAc 3'
miR-450c-3p	MEF2D	Query: 3' tgCTTACGTTTTACAAGGGTTa 5'
		| |||| |:| |||||||
		Ref: 5' caGCATGCCCAGTCTTCCCAAa 3'
miR-450c-3p	MYBPC1	Query: 3' tgcttacgttttacAAGGGTTa 5'
		|||||||
		Ref: 5' ttggtcactgtactTTCCCAAg 3'
miR-450c-3p	TPM3	Query: 3' tgcttacgttttACAAGGGTTa 5'
		|||||||||
		Ref: 5' gatcctctacccTGTTCCCAAt 3'
miR-500	ACTN2	Query: 3' tcttaGGAACGGG--TCCACGTa 5'
		||| ||: |||||||
		Ref: 5' acaccCCTCACCTCAAGGTGCAt 3'
miR-500	COPS2	Query: 3' tcttaggaacggGTCCACGTa 5'
		||||||||
		Ref: 5' cagtattaaataCAGGTGCAa 3'
miR-500	FBXO40	Query: 3' tctTAGGAA---CG---GGTCCACGTa 5'
		|||||| || |||||||||
		Ref: 5' tacATCCTTTTAGCTCTCCAGGTGCAg 3'
miR-500	TMOD1	Query: 3' tcttaggaAC-GGGTCCACGTa 5'
		|| ::||||||||
		Ref: 5' ctgtgtggTGTTTCAGGTGCAt 3'

## Sheet: F
Predicted target analysis of DE miRNAs with DE circRNAs between LT90D and LW90D samples
Query	Ref	Binding
circKIAA2026	miR-129a-5p	Query: 3' cgTTCGGGTC---TGGCGTTTTTc 5'
		|:|||| | | :|||||||
		Ref: 5' gcAGGCCCTGTGAAATGCAAAAAg 3'
circKIAA2026	miR-129a-5p	Query: 3' cgttcgggTCTGG-CGTTTTTc 5'
		| |:| |||||||
		Ref: 5' tttatagaAAATCAGCAAAAAt 3'
circKIAA2026	miR-129a-5p	Query: 3' cgttcgggtCTGGCGTTTTTc 5'
		|| |||||||
		Ref: 5' aactaaaatGAGAGCAAAAAa 3'
circPHTF1	miR-129a-5p	Query: 3' cgttcgggtCTGGCGTTTTTc 5'
		|| :|||||||
		Ref: 5' gaagggagtGAATGCAAAAAg 3'
circKIAA2026	miR-129b	Query: 3' cgTTCGGGTC---TGGCGTTTTTc 5'
		|:|||| | | :|||||||
		Ref: 5' gcAGGCCCTGTGAAATGCAAAAAg 3'
circKIAA2026	miR-129b	Query: 3' cgttcgggTCTGG-CGTTTTTc 5'
		| |:| |||||||
		Ref: 5' tttatagaAAATCAGCAAAAAt 3'
circKIAA2026	miR-129b	Query: 3' cgttcgggtCTGGCGTTTTTc 5'
		|| |||||||
		Ref: 5' aactaaaatGAGAGCAAAAAa 3'
circPHTF1	miR-129b	Query: 3' cgttcgggtCTGGCGTTTTTc 5'
		|| :|||||||
		Ref: 5' gaagggagtGAATGCAAAAAg 3'
circNDFIP2	let-7i	Query: 3' tcGTGTT-TGATGATGGAGt 5'
		:|||: ::|:|||||||
		Ref: 5' ccTACAGTGTTGCTACCTCc 3'
circPHKB	miR-16	Query: 3' gcGGTTATAAATG-CACGACGAt 5'
		:||| :| || |||||||
		Ref: 5' tgTCAA-GTCAACATTGCTGCTg 3'
circKANSL1L-3	miR-21	Query: 3' agTTGTAGTCAGACTATTCGAt 5'
		||| | | |||||||
		Ref: 5' ggAACCCAACTGCAATAAGCTg 3'
circKANSL1L_2	miR-21	Query: 3' agTTGTAGTCAGACTATTCGAt 5'
		||| | | |||||||
		Ref: 5' ggAACCCAACTGCAATAAGCTg 3'
circKANSL1L	miR-21	Query: 3' agTTGTAGTCAGACTATTCGAt 5'
		||| | | |||||||
		Ref: 5' ggAACCCAACTGCAATAAGCTg 3'
circDEK	miR-21	Query: 3' agttgtagTCAGA-CTATTCGAt 5'
		| ||| |||||||
		Ref: 5' agcttagaAATCTACATAAGCTg 3'

## Sheet: G
Predicted target analysis of DE miRNAs with DE coding genes that related to myogenesis between LT90D and LW90D samples
Query	Ref	Binding
miR-1285	MEF2C	Query: 3' tgccccagaGCGA-TACAACGGGTc 5'
		| || | |||||||
		Ref: 5' aagtgcataCCCTAAACTTGCCCAt 3'
miR-1285	MEF2D	Query: 3' tgccccagagcgatacAACGGGTc 5'
		|||||||
		Ref: 5' catgcatcccagagccTTGCCCAg 3'
miR-1285	RHOA	Query: 3' tgccccaGAG-CGATACAACGGGTc 5'
		||| || : |||||||
		Ref: 5' ccccctgCTCAGCAGCATTGCCCAt 3'
miR-129a-5p	ANKRD1	Query: 3' cgTTCGGGT-CTGGCGTTTTTc 5'
		|| | | | :|||||||
		Ref: 5' cgAACCGAATGTGTGCAAAAAa 3'
miR-129a-5p	COPS2	Query: 3' cgtTCGGG-TC--TGGCGTTTTTc 5'
		||||| || |: |||||||
		Ref: 5' agcAGCCCAAGAAATAGCAAAAAg 3'
miR-129a-5p	COPS2	Query: 3' cgttcggGTCTGGCGTTTTTc 5'
		:| :: |||||||
		Ref: 5' attgagaTATGTAGCAAAAAa 3'
miR-129a-5p	SIX1	Query: 3' cgttcGGGTCTGGCGTTTTTc 5'
		:|:|| ::|||||||
		Ref: 5' tagttTCTAGCTTGCAAAAAt 3'
miR-129a-5p	SIX1	Query: 3' cgttCGGGTCTGGCGTTTTTc 5'
		|||::|: |||||||
		Ref: 5' ttttGCCTGGG--GCAAAAAt 3'
miR-129b	ANKRD1	Query: 3' cgTTCGGGT-CTGGCGTTTTTc 5'
		|| | | | :|||||||
		Ref: 5' cgAACCGAATGTGTGCAAAAAa 3'
miR-129b	COPS2	Query: 3' cgtTCGGG-TC--TGGCGTTTTTc 5'
		||||| || |: |||||||
		Ref: 5' agcAGCCCAAGAAATAGCAAAAAg 3'
miR-129b	COPS2	Query: 3' cgttcggGTCTGGCGTTTTTc 5'
		:| :: |||||||
		Ref: 5' attgagaTATGTAGCAAAAAa 3'
miR-129b	SIX1	Query: 3' cgttcGGGTCTGGCGTTTTTc 5'
		:|:|| ::|||||||
		Ref: 5' tagttTCTAGCTTGCAAAAAt 3'
miR-129b	SIX1	Query: 3' cgttCGGGTCTGGCGTTTTTc 5'
		|||::|: |||||||
		Ref: 5' ttttGCCTGGG--GCAAAAAt 3'
miR-181a	CAV1	Query: 3' ttgagtgGCTGTC-GCAACTTACAa 5'
		| |::| | ||||||||
		Ref: 5' ttccaggCTATGGCCATTGAATGTa 3'
miR-181a	COPS2	Query: 3' ttgaGTGGCTGTCG--CAACTTACAa 5'
		||: |||||| |||||||
		Ref: 5' agaaCATAGACAGCTAAATGAATGTt 3'
miR-181a	COPS2	Query: 3' ttgagtggcTGTCG---CAACTTACAa 5'
		:|||| ||||||||
		Ref: 5' aatggagacGCAGCTCATTTGAATGTa 3'
miR-181a	COPS2	Query: 3' ttGAGTGGCTG-TCGCAACTTACAa 5'
		||: ||: || |||||||
		Ref: 5' ttCTTTAAGATGAGATATGAATGTa 3'
miR-181a	MEOX2	Query: 3' ttgagtggctgtcgcaACTTACAa 5'
		|||||||
		Ref: 5' gtaaaagataaaattcTGAATGTc 3'
miR-181a	MYF6	Query: 3' ttgagTGGCTGTCGC---AACTTACAa 5'
		||:| :||:| ||||||||
		Ref: 5' tcgcaACTGTTAGTGGGATTGAATGTa 3'
miR-181a	SRPK3	Query: 3' ttGAGTGGCTGTC-GCA-ACTTACAa 5'
		|||| || :| | | |||||||
		Ref: 5' ccCTCAGAGAGGGTCCTCTGAATGTg 3'
miR-181b	CAV1	Query: 3' ttGGGTGGCTGTC-GTTACTTACAa 5'
		|| : | |::| || |||||||
		Ref: 5' ttCCAGGCTATGGCCATTGAATGTa 3'
miR-181b	COPS2	Query: 3' ttggGTGGCTGTCG--TTACTTACAa 5'
		||: |||||| |||||||||
		Ref: 5' agaaCATAGACAGCTAAATGAATGTt 3'
miR-181b	COPS2	Query: 3' ttgggtggCTG-TCGTTACTTACAa 5'
		||: || ||||||||
		Ref: 5' ttctttaaGATGAGATATGAATGTa 3'
miR-181b	COPS2	Query: 3' ttgggtggcTGTC--GT-TACTTACAa 5'
		:||| || |||||||
		Ref: 5' aatggagacGCAGCTCATTTGAATGTa 3'
miR-181b	MEOX2	Query: 3' ttgggtggctgtcgttACTTACAa 5'
		|||||||
		Ref: 5' gtaaaagataaaattcTGAATGTc 3'
miR-181b	MYF6	Query: 3' ttgGGTGGCTGTCGTTACTTACAa 5'
		|:::: :::| | |||||||
		Ref: 5' caaCTGTTAGTGGGATTGAATGTa 3'
miR-181b	SRPK3	Query: 3' ttGGGTGGCTGTC--GTTACTTACAa 5'
		|:|| || :| | |||||||
		Ref: 5' ccCTCAGAGAGGGTCCTCTGAATGTg 3'
miR-181d-5p	CAV1	Query: 3' ttGGGTGGCTGTT-GTTACTTACAa 5'
		|| : | |::: || |||||||
		Ref: 5' ttCCAGGCTATGGCCATTGAATGTa 3'
miR-181d-5p	COPS2	Query: 3' ttggGTGGCTGTTG--TTACTTACAa 5'
		||: ||||:| |||||||||
		Ref: 5' agaaCATAGACAGCTAAATGAATGTt 3'
miR-181d-5p	COPS2	Query: 3' ttgggtggCTGTTGT-TACTTACAa 5'
		||::| | ||||||||
		Ref: 5' ttctttaaGATGAGATATGAATGTa 3'
miR-181d-5p	COPS2	Query: 3' ttggGTGGCTGTTGTTACTTACAa 5'
		|:| | : |: |||||||
		Ref: 5' gagaCGCAGCTCAT-TTGAATGTa 3'
miR-181d-5p	MEOX2	Query: 3' ttgggtggcTGTTGTTACTTACAa 5'
		| ||: |||||||
		Ref: 5' gtaaaagatAAAATTCTGAATGTc 3'
miR-181d-5p	MYF6	Query: 3' ttgGGTGGCTGTTGTTACTTACAa 5'
		|:::: :::: | |||||||
		Ref: 5' caaCTGTTAGTGGGATTGAATGTa 3'
miR-181d-5p	SRPK3	Query: 3' ttGGGTGGCTGTT--GTTACTTACAa 5'
		|:|| || :: | |||||||
		Ref: 5' ccCTCAGAGAGGGTCCTCTGAATGTg 3'
let-7i	MEF2D	Query: 3' tcGTGTTTGA-TGATGGAGt 5'
		||: : || :|||||||
		Ref: 5' ctCATTGTCTCGCTACCTCc 3'
miR-16	ATF3	Query: 3' gcGGTTATAAATGCACGACGAt 5'
		|||: | | | ||||||||
		Ref: 5' ggCCAGCAGTGA-GTGCTGCTg 3'
miR-16	COPS2	Query: 3' gcGGTTATAAATGCACGACGAt 5'
		|::| :| | : |||||||
		Ref: 5' ctCTGAGGTATCTTTGCTGCTg 3'
miR-16	COPS2	Query: 3' gcGGTT-A-TAAATGC---ACGACGAt 5'
		:||| | :|||::| |||||||
		Ref: 5' gaTCAACTGGTTTGTGTTTTGCTGCTg 3'
miR-16	MAPK14	Query: 3' gcggTTATAAATGCACGACGAt 5'
		|: || || |||||||
		Ref: 5' attgAGCATGCAC-TGCTGCTt 3'
miR-16	MEOX2	Query: 3' gcggttATAAATGCACGACGAt 5'
		||| || |||||||
		Ref: 5' attttcTATCAAC-TGCTGCTa 3'
miR-16	SIX1	Query: 3' gcgGTTATAAATGCACGACGAt 5'
		|||| |: |||||||
		Ref: 5' gggCAATCCAGAT-TGCTGCTt 3'
miR-95	PPARD	Query: 3' acGA-GTTATTTATGGGCAACTt 5'
		|| |:: | :| :|||||||
		Ref: 5' gcCTGCGGGACGTTTCCGTTGAc 3'
miR-21	MEF2C	Query: 3' agTTGTAGTCA-GA--CTATTCGAt 5'
		|||| | | || ||||||||
		Ref: 5' taAACAGAAATGCTGAGATAAGCTt 3'
miR-21	MEF2C	Query: 3' agtTGTAGTCAGACTATTCGAt 5'
		||| |:| | |||||||
		Ref: 5' ctcACAGCGG-C--ATAAGCTg 3'

## Sheet: H
	CircRNA→miRNA→mRNA networks identified by competing to bind with shared miRNAs between LT1D and LT90D samples
	circRNA	miRNA	gene	circRNA-miRNA		miRNA-gene		circRNA-gene
				R	P	R	P	R	P
	circNDFIP2	let-7i	MEF2D	0.226634	0.47874	0.272021	0.392374	-0.310084	0.326648
	circTRIP11	let-7i	MEF2D	0.294848	0.352193	0.272021	0.392374	-0.487753	0.107705
	circAGO4	miR-122	MEF2D	0.359919	0.250484	-0.525969	0.079009	0.408202	0.187725
	circAGO4	miR-122	MYOD1	0.359919	0.250484	-0.412169	0.183052	0.279777	0.378467
	circAMOTL1	miR-125b	ENG	-0.336423	0.284967	0.654783	0.0208484	-0.434584	0.158019
	circAMOTL1	miR-125b	ITGA8	-0.336423	0.284967	-0.103398	0.749137	0.0466949	0.88542
	circAMOTL1	miR-125b	MYOD1	-0.336423	0.284967	0.460178	0.132236	-0.492717	0.103636
	circGPAT3	miR-125b	ENG	0.232245	0.467619	0.654783	0.0208484	0.410284	0.185263
	circGPAT3	miR-125b	ITGA8	0.232245	0.467619	-0.103398	0.749137	0.0152831	0.962401
	circGPAT3	miR-125b	MYOD1	0.232245	0.467619	0.460178	0.132236	0.478771	0.115333
	circTRIP11	miR-125b	ENG	-0.0863596	0.789574	0.654783	0.0208484	-0.24903	0.435081
	circTRIP11	miR-125b	ITGA8	-0.0863596	0.789574	-0.103398	0.749137	0.267611	0.400394
	circTRIP11	miR-125b	MYOD1	-0.0863596	0.789574	0.460178	0.132236	-0.110232	0.733072
	circMYBPC2	miR-127	ENG	0.189774	0.55469	0.662376	0.0189269	-0.175929	0.584426
	circAGO4	miR-128	CFL2	-0.0186575	0.954106	-0.427823	0.165327	0.154815	0.630927
	circAGO4	miR-128	ENG	-0.0186575	0.954106	0.801804	0.00170847	0.124711	0.699369
	circAGO4	miR-128	PFKM	-0.0186575	0.954106	-0.318849	0.312427	-0.478967	0.115163
	circAGO4	miR-128	PLAGL1	-0.0186575	0.954106	-0.255861	0.422164	0.513575	0.0876637
	circAGO4	miR-128	TIPARP	-0.0186575	0.954106	-0.198462	0.536354	0.142419	0.658823
	circKANSL1L_3	miR-128	CFL2	-0.0104537	0.974278	-0.427823	0.165327	0.297033	0.348465
	circKANSL1L_3	miR-128	ENG	-0.0104537	0.974278	0.801804	0.00170847	-0.209617	0.513196
	circKANSL1L_3	miR-128	PFKM	-0.0104537	0.974278	-0.318849	0.312427	0.7605	0.00408389
	circKANSL1L_3	miR-128	PLAGL1	-0.0104537	0.974278	-0.255861	0.422164	-0.219647	0.492757
	circKANSL1L_3	miR-128	TIPARP	-0.0104537	0.974278	-0.198462	0.536354	0.543958	0.0675132
	circKANSL1L_2	miR-128	CFL2	-0.110374	0.73274	-0.427823	0.165327	0.112245	0.728361
	circKANSL1L_2	miR-128	ENG	-0.110374	0.73274	0.801804	0.00170847	-0.297518	0.347641
	circKANSL1L_2	miR-128	PFKM	-0.110374	0.73274	-0.318849	0.312427	0.854266	0.000403226
	circKANSL1L_2	miR-128	PLAGL1	-0.110374	0.73274	-0.255861	0.422164	-0.404582	0.192052
	circKANSL1L_2	miR-128	TIPARP	-0.110374	0.73274	-0.198462	0.536354	0.371118	0.234956
	circKANSL1L	miR-128	CFL2	-0.103477	0.748951	-0.427823	0.165327	0.196387	0.54071
	circKANSL1L	miR-128	ENG	-0.103477	0.748951	0.801804	0.00170847	-0.305955	0.333468
	circKANSL1L	miR-128	PFKM	-0.103477	0.748951	-0.318849	0.312427	0.824016	0.00098127
	circKANSL1L	miR-128	PLAGL1	-0.103477	0.748951	-0.255861	0.422164	-0.412568	0.182586
	circKANSL1L	miR-128	TIPARP	-0.103477	0.748951	-0.198462	0.536354	0.349676	0.265202
	circLIMCH1	miR-128	CFL2	-0.579605	0.0482448	-0.427823	0.165327	0.276535	0.384249
	circLIMCH1	miR-128	ENG	-0.579605	0.0482448	0.801804	0.00170847	-0.455418	0.136809
	circLIMCH1	miR-128	PFKM	-0.579605	0.0482448	-0.318849	0.312427	0.767921	0.00353688
	circLIMCH1	miR-128	PLAGL1	-0.579605	0.0482448	-0.255861	0.422164	-0.26787	0.399922
	circLIMCH1	miR-128	TIPARP	-0.579605	0.0482448	-0.198462	0.536354	0.345048	0.272011
	circWWP1	miR-128	CFL2	-0.123276	0.702689	-0.427823	0.165327	-0.119693	0.710997
	circWWP1	miR-128	ENG	-0.123276	0.702689	0.801804	0.00170847	-0.139773	0.66483
	circWWP1	miR-128	PFKM	-0.123276	0.702689	-0.318849	0.312427	0.735839	0.00637064
	circWWP1	miR-128	PLAGL1	-0.123276	0.702689	-0.255861	0.422164	-0.559906	0.0583347
	circWWP1	miR-128	TIPARP	-0.123276	0.702689	-0.198462	0.536354	0.0759924	0.81442
	circENPEP	miR-1285	DLG1	-0.422636	0.171074	0.53134	0.075446	-0.410722	0.184748
	circENPEP	miR-1285	ID2	-0.422636	0.171074	0.449472	0.142663	0.485601	0.109501
	circENPEP	miR-1285	MEF2D	-0.422636	0.171074	-0.187062	0.560465	0.487233	0.108137
	circAGL	miR-130a	ATF3	-0.457143	0.135141	-0.0741762	0.818789	0.417026	0.177432
	circAGL	miR-130a	CFL2	-0.457143	0.135141	-0.285557	0.368273	-0.113947	0.724382
	circAGL	miR-130a	DLG1	-0.457143	0.135141	-0.250291	0.432683	0.276926	0.383549
	circKANSL1L_3	miR-130a	ATF3	0.0562417	0.862175	-0.0741762	0.818789	0.0484673	0.881098
	circKANSL1L_3	miR-130a	CFL2	0.0562417	0.862175	-0.285557	0.368273	0.297033	0.348465
	circKANSL1L_3	miR-130a	DLG1	0.0562417	0.862175	-0.250291	0.432683	0.599054	0.039555
	circKANSL1L_2	miR-130a	ATF3	-0.0276159	0.932108	-0.0741762	0.818789	0.297774	0.347205
	circKANSL1L_2	miR-130a	CFL2	-0.0276159	0.932108	-0.285557	0.368273	0.112245	0.728361
	circKANSL1L_2	miR-130a	DLG1	-0.0276159	0.932108	-0.250291	0.432683	0.597417	0.0402396
	circKANSL1L	miR-130a	ATF3	-0.00604976	0.985113	-0.0741762	0.818789	0.158761	0.622136
	circKANSL1L	miR-130a	CFL2	-0.00604976	0.985113	-0.285557	0.368273	0.196387	0.54071
	circKANSL1L	miR-130a	DLG1	-0.00604976	0.985113	-0.250291	0.432683	0.531205	0.0755346
	circWWP1	miR-130a	ATF3	-0.0611528	0.850255	-0.0741762	0.818789	0.674839	0.0160582
	circWWP1	miR-130a	CFL2	-0.0611528	0.850255	-0.285557	0.368273	-0.119693	0.710997
	circWWP1	miR-130a	DLG1	-0.0611528	0.850255	-0.250291	0.432683	0.368524	0.238501
	circGPAT3	miR-133b	MAFF	0.105494	0.7442	0.261902	0.410901	0.513066	0.0880321
	circGPAT3	miR-133b	MSTN	0.105494	0.7442	-0.154172	0.632361	-0.136539	0.672198
	circGPAT3	miR-133b	MYOD1	0.105494	0.7442	0.0620536	0.848071	0.478771	0.115333
	circKANSL1L_3	miR-133b	MAFF	-0.158178	0.623431	0.261902	0.410901	-0.313893	0.320426
	circKANSL1L_3	miR-133b	MSTN	-0.158178	0.623431	-0.154172	0.632361	0.783678	0.00256096
	circKANSL1L_3	miR-133b	MYOD1	-0.158178	0.623431	0.0620536	0.848071	0.0793292	0.806405
	circKANSL1L_2	miR-133b	MAFF	-0.353538	0.259595	0.261902	0.410901	-0.491791	0.104387
	circKANSL1L_2	miR-133b	MSTN	-0.353538	0.259595	-0.154172	0.632361	0.797442	0.00189002
	circKANSL1L_2	miR-133b	MYOD1	-0.353538	0.259595	0.0620536	0.848071	-0.0601518	0.852682
	circAMOTL1	miR-1343	ANKRD2	-0.255292	0.423234	0.0890496	0.783155	-0.535903	0.0725073
	circAMOTL1	miR-1343	CALCRL	-0.255292	0.423234	-0.370892	0.235263	-0.286803	0.366095
	circAMOTL1	miR-1343	ENG	-0.255292	0.423234	0.706274	0.0102483	-0.434584	0.158019
	circAMOTL1	miR-1343	MAFF	-0.255292	0.423234	0.406696	0.189518	-0.67332	0.0163896
	circAMOTL1	miR-1343	MYOD1	-0.255292	0.423234	0.47699	0.116887	-0.492717	0.103636
	circLIMCH1	miR-1343	ANKRD2	-0.420566	0.173403	0.0890496	0.783155	-0.192923	0.548015
	circLIMCH1	miR-1343	CALCRL	-0.420566	0.173403	-0.370892	0.235263	0.244118	0.444487
	circLIMCH1	miR-1343	ENG	-0.420566	0.173403	0.706274	0.0102483	-0.455418	0.136809
	circLIMCH1	miR-1343	MAFF	-0.420566	0.173403	0.406696	0.189518	-0.600303	0.0390377
	circLIMCH1	miR-1343	MYOD1	-0.420566	0.173403	0.47699	0.116887	-0.191087	0.551902
	circSTAG2	miR-1343	ANKRD2	-0.274548	0.387815	0.0890496	0.783155	0.127119	0.69381
	circSTAG2	miR-1343	CALCRL	-0.274548	0.387815	-0.370892	0.235263	0.540151	0.0698431
	circSTAG2	miR-1343	ENG	-0.274548	0.387815	0.706274	0.0102483	-0.534582	0.07335
	circSTAG2	miR-1343	MAFF	-0.274548	0.387815	0.406696	0.189518	-0.449976	0.14216
	circSTAG2	miR-1343	MYOD1	-0.274548	0.387815	0.47699	0.116887	0.0990462	0.759414
	circKIF1B	miR-136	COPS2	0.159182	0.621201	-0.161487	0.616088	0.279449	0.379051
	circKIF1B	miR-136	DLG1	0.159182	0.621201	-0.0194851	0.952073	0.554185	0.0615204
	circKIF1B	miR-136	ITGA8	0.159182	0.621201	0.01841	0.954715	0.424267	0.169254
	circKIF1B	miR-136	MSTN	0.159182	0.621201	0.327778	0.298298	0.75959	0.00415515
	circKIF1B	miR-136	MYOD1	0.159182	0.621201	0.630148	0.028066	-0.176267	0.583693
	circLIMCH1	miR-136	COPS2	-0.249411	0.434357	-0.161487	0.616088	0.351515	0.262523
	circLIMCH1	miR-136	DLG1	-0.249411	0.434357	-0.0194851	0.952073	0.537742	0.0713454
	circLIMCH1	miR-136	ITGA8	-0.249411	0.434357	0.01841	0.954715	0.290337	0.359953
	circLIMCH1	miR-136	MSTN	-0.249411	0.434357	0.327778	0.298298	0.534419	0.0734541
	circLIMCH1	miR-136	MYOD1	-0.249411	0.434357	0.630148	0.028066	-0.191087	0.551902
	circSTAG2	miR-136	COPS2	-0.0499573	0.877466	-0.161487	0.616088	0.680143	0.0149399
	circSTAG2	miR-136	DLG1	-0.0499573	0.877466	-0.0194851	0.952073	0.847228	0.000504146
	circSTAG2	miR-136	ITGA8	-0.0499573	0.877466	0.01841	0.954715	0.704855	0.0104704
	circSTAG2	miR-136	MSTN	-0.0499573	0.877466	0.327778	0.298298	0.88721	0.000118621
	circSTAG2	miR-136	MYOD1	-0.0499573	0.877466	0.630148	0.028066	0.0990462	0.759414
	circWWP1	miR-136	COPS2	0.245174	0.442457	-0.161487	0.616088	0.0224676	0.944746
	circWWP1	miR-136	DLG1	0.245174	0.442457	-0.0194851	0.952073	0.368524	0.238501
	circWWP1	miR-136	ITGA8	0.245174	0.442457	0.01841	0.954715	0.186631	0.561385
	circWWP1	miR-136	MSTN	0.245174	0.442457	0.327778	0.298298	0.547715	0.0652669
	circWWP1	miR-136	MYOD1	0.245174	0.442457	0.630148	0.028066	-0.10627	0.742375
	circKANSL1L_3	miR-142-3p	CFL2	-0.218048	0.495992	-0.237982	0.456372	0.297033	0.348465
	circKANSL1L_3	miR-142-3p	ITGA8	-0.218048	0.495992	-0.329927	0.294952	0.414425	0.180429
	circKANSL1L_3	miR-142-3p	TIPARP	-0.218048	0.495992	-0.287231	0.365348	0.543958	0.0675132
	circKANSL1L_2	miR-142-3p	CFL2	-0.0789457	0.807325	-0.237982	0.456372	0.112245	0.728361
	circKANSL1L_2	miR-142-3p	ITGA8	-0.0789457	0.807325	-0.329927	0.294952	0.379355	0.223909
	circKANSL1L_2	miR-142-3p	TIPARP	-0.0789457	0.807325	-0.287231	0.365348	0.371118	0.234956
	circDCUN1D1	miR-142-5p	CFL2	-0.239862	0.452716	0.123355	0.702506	0.294156	0.353377
	circDCUN1D1	miR-142-5p	COPS2	-0.239862	0.452716	-0.00808617	0.980102	0.428908	0.16414
	circDCUN1D1	miR-142-5p	DLG1	-0.239862	0.452716	-0.0633879	0.844839	0.66847	0.0174811
	circDCUN1D1	miR-142-5p	ITGA8	-0.239862	0.452716	-0.0550762	0.865008	0.597582	0.0401701
	circDCUN1D1	miR-142-5p	PLAGL1	-0.239862	0.452716	0.100309	0.756427	-0.260219	0.414022
	circEMC2	miR-142-5p	CFL2	-0.25222	0.429027	0.123355	0.702506	0.397679	0.200473
	circEMC2	miR-142-5p	COPS2	-0.25222	0.429027	-0.00808617	0.980102	0.624459	0.0299605
	circEMC2	miR-142-5p	DLG1	-0.25222	0.429027	-0.0633879	0.844839	0.712595	0.00930133
	circEMC2	miR-142-5p	ITGA8	-0.25222	0.429027	-0.0550762	0.865008	0.686278	0.0137193
	circEMC2	miR-142-5p	PLAGL1	-0.25222	0.429027	0.100309	0.756427	-0.0276793	0.931953
	circTESK2	miR-1468	ENG	-0.310758	0.325542	-0.445364	0.1468	-0.32327	0.305385
	circTESK2	miR-1468	MTM1	-0.310758	0.325542	0.653715	0.0211297	0.161346	0.6164
	circTRIP11	miR-1468	ENG	-0.34824	0.267303	-0.445364	0.1468	-0.24903	0.435081
	circTRIP11	miR-1468	MTM1	-0.34824	0.267303	0.653715	0.0211297	0.135787	0.673917
	circLIMCH1	miR-146a-5p	COPS2	0.0891574	0.782898	0.073301	0.820897	0.351515	0.262523
	circLIMCH1	miR-146a-5p	FOXN2	0.0891574	0.782898	-0.0196544	0.951657	0.388042	0.212602
	circLIMCH1	miR-146a-5p	MAFF	0.0891574	0.782898	-0.0594232	0.85445	-0.600303	0.0390377
	circLIMCH1	miR-146a-5p	PLAGL1	0.0891574	0.782898	0.316266	0.316582	-0.26787	0.399922
	circATG4C	miR-150	CCL5	0.300288	0.342953	0.298697	0.345641	0.724145	0.00774146
	circATG4C	miR-150	COPS2	0.300288	0.342953	0.708221	0.00994929	0.316001	0.317009
	circATG4C	miR-150	MAFF	0.300288	0.342953	0.129286	0.688821	-0.470139	0.122993
	circATG4C	miR-150	MYOD1	0.300288	0.342953	0.160466	0.61835	-0.232593	0.466933
	circATG4C	miR-150	SOX11	0.300288	0.342953	0.274885	0.387208	-0.278477	0.380781
	circMYBPC2	miR-150	CCL5	-0.188152	0.55814	0.298697	0.345641	0.574236	0.0508625
	circMYBPC2	miR-150	COPS2	-0.188152	0.55814	0.708221	0.00994929	0.0416227	0.897805
	circMYBPC2	miR-150	MAFF	-0.188152	0.55814	0.129286	0.688821	-0.496711	0.100438
	circMYBPC2	miR-150	MYOD1	-0.188152	0.55814	0.160466	0.61835	-0.27542	0.386249
	circMYBPC2	miR-150	SOX11	-0.188152	0.55814	0.274885	0.387208	-0.482274	0.112317
	circMYO18B	miR-150	CCL5	0.0540801	0.86743	0.298697	0.345641	0.475603	0.118107
	circMYO18B	miR-150	COPS2	0.0540801	0.86743	0.708221	0.00994929	0.406523	0.189725
	circMYO18B	miR-150	MAFF	0.0540801	0.86743	0.129286	0.688821	-0.481479	0.112997
	circMYO18B	miR-150	MYOD1	0.0540801	0.86743	0.160466	0.61835	0.0115871	0.97149
	circMYO18B	miR-150	SOX11	0.0540801	0.86743	0.274885	0.387208	-0.341117	0.277873
	circFAM188A	miR-151-3p	COPS2	-0.230398	0.471266	0.402107	0.195047	0.37357	0.231634
	circFAM188A	miR-151-3p	ENG	-0.230398	0.471266	-0.394884	0.203947	-0.600118	0.039114
	circPHKB	miR-151-3p	COPS2	-0.494014	0.10259	0.402107	0.195047	0.427313	0.165886
	circPHKB	miR-151-3p	ENG	-0.494014	0.10259	-0.394884	0.203947	-0.183856	0.567323
	circSNRK	miR-151-3p	COPS2	0.509535	0.0906176	0.402107	0.195047	0.822177	0.00103025
	circSNRK	miR-151-3p	ENG	0.509535	0.0906176	-0.394884	0.203947	-0.677293	0.0155334
	circLIFR	miR-16	ATF3	0.281388	0.375612	-0.199411	0.534366	0.454632	0.137574
	circLIFR	miR-16	COPS2	0.281388	0.375612	0.614015	0.0336748	0.443973	0.148218
	circLIFR	miR-16	ENG	0.281388	0.375612	-0.398488	0.199475	-0.526126	0.0789027
	circLIFR	miR-16	FOXN2	0.281388	0.375612	0.561058	0.0577074	0.432216	0.160555
	circLIFR	miR-16	LAMP2	0.281388	0.375612	0.511855	0.0889134	0.513289	0.0878704
	circLIFR	miR-16	MEOX2	0.281388	0.375612	0.725599	0.00755996	0.483627	0.111166
	circLIFR	miR-16	MAFF	0.281388	0.375612	0.227476	0.477064	-0.422925	0.170751
	circLIFR	miR-16	MYOD1	0.281388	0.375612	0.190724	0.552671	-0.233317	0.465507
	circPHKB	miR-16	ATF3	-0.154739	0.631095	-0.199411	0.534366	0.221751	0.488518
	circPHKB	miR-16	COPS2	-0.154739	0.631095	0.614015	0.0336748	0.427313	0.165886
	circPHKB	miR-16	ENG	-0.154739	0.631095	-0.398488	0.199475	-0.183856	0.567323
	circPHKB	miR-16	FOXN2	-0.154739	0.631095	0.561058	0.0577074	0.392905	0.206428
	circPHKB	miR-16	LAMP2	-0.154739	0.631095	0.511855	0.0889134	0.559555	0.0585266
	circPHKB	miR-16	MEOX2	-0.154739	0.631095	0.725599	0.00755996	0.364508	0.244051
	circPHKB	miR-16	MAFF	-0.154739	0.631095	0.227476	0.477064	-0.42124	0.172643
	circPHKB	miR-16	MYOD1	-0.154739	0.631095	0.190724	0.552671	0.19905	0.535122
	circTRIP11	miR-16	ATF3	-0.342085	0.276422	-0.199411	0.534366	0.116325	0.718834
	circTRIP11	miR-16	COPS2	-0.342085	0.276422	0.614015	0.0336748	0.175081	0.586267
	circTRIP11	miR-16	ENG	-0.342085	0.276422	-0.398488	0.199475	-0.24903	0.435081
	circTRIP11	miR-16	FOXN2	-0.342085	0.276422	0.561058	0.0577074	0.0284475	0.930068
	circTRIP11	miR-16	LAMP2	-0.342085	0.276422	0.511855	0.0889134	0.18999	0.554231
	circTRIP11	miR-16	MEOX2	-0.342085	0.276422	0.725599	0.00755996	0.0115448	0.971594
	circTRIP11	miR-16	MAFF	-0.342085	0.276422	0.227476	0.477064	-0.441857	0.150392
	circTRIP11	miR-16	MYOD1	-0.342085	0.276422	0.190724	0.552671	-0.110232	0.733072
	circWWP1	miR-181c	CALCRL	0.120817	0.708387	-0.444909	0.147263	-0.212591	0.507097
	circWWP1	miR-181c	CFL2	0.120817	0.708387	-0.275179	0.386681	-0.119693	0.710997
	circWWP1	miR-181c	COPS2	0.120817	0.708387	-0.305671	0.333941	0.0224676	0.944746
	circWWP1	miR-181c	DLG1	0.120817	0.708387	-0.212288	0.507718	0.368524	0.238501
	circWWP1	miR-181c	MSTN	0.120817	0.708387	0.174639	0.587228	0.547715	0.0652669
	circWWP1	miR-181c	MTM1	0.120817	0.708387	-0.310293	0.326306	0.0310961	0.923573
	circTRIP11	miR-181c	CALCRL	0.164834	0.608693	-0.444909	0.147263	-0.116741	0.717864
	circTRIP11	miR-181c	CFL2	0.164834	0.608693	-0.275179	0.386681	0.0974044	0.7633
	circTRIP11	miR-181c	COPS2	0.164834	0.608693	-0.305671	0.333941	0.175081	0.586267
	circTRIP11	miR-181c	DLG1	0.164834	0.608693	-0.212288	0.507718	0.44287	0.149348
	circTRIP11	miR-181c	MSTN	0.164834	0.608693	0.174639	0.587228	0.705061	0.0104379
	circTRIP11	miR-181c	MTM1	0.164834	0.608693	-0.310293	0.326306	0.135787	0.673917
	circFAM188A	miR-182	FOXN2	0.477748	0.116224	0.146498	0.649596	0.307899	0.330248
	circFAM188A	miR-182	MEF2D	0.477748	0.116224	-0.772072	0.00325629	-0.803353	0.00164734
	circFAM188A	miR-182	MTM1	0.477748	0.116224	0.274569	0.387777	0.372322	0.233322
	circGPAT3	miR-182	FOXN2	-0.463102	0.129477	0.146498	0.649596	0.313941	0.320348
	circGPAT3	miR-182	MEF2D	-0.463102	0.129477	-0.772072	0.00325629	0.460273	0.132146
	circGPAT3	miR-182	MTM1	-0.463102	0.129477	0.274569	0.387777	0.142933	0.657658
	circZMYM4	miR-182	FOXN2	0.238045	0.45625	0.146498	0.649596	0.331767	0.292104
	circZMYM4	miR-182	MEF2D	0.238045	0.45625	-0.772072	0.00325629	-0.57193	0.0520167
	circZMYM4	miR-182	MTM1	0.238045	0.45625	0.274569	0.387777	0.34483	0.272334
	circLIFR	miR-195	ATF3	0.556785	0.0600581	0.063159	0.845393	0.454632	0.137574
	circLIFR	miR-195	COPS2	0.556785	0.0600581	0.335178	0.286865	0.443973	0.148218
	circLIFR	miR-195	ENG	0.556785	0.0600581	-0.650756	0.0219236	-0.526126	0.0789027
	circLIFR	miR-195	FOXN2	0.556785	0.0600581	0.395875	0.202711	0.432216	0.160555
	circLIFR	miR-195	LAMP2	0.556785	0.0600581	0.240819	0.450859	0.513289	0.0878704
	circLIFR	miR-195	MAFF	0.556785	0.0600581	-0.28346	0.371956	-0.422925	0.170751
	circLIFR	miR-195	MYOD1	0.556785	0.0600581	-0.333852	0.288895	-0.233317	0.465507
	circPHKB	miR-195	ATF3	-0.12356	0.702031	0.063159	0.845393	0.221751	0.488518
	circPHKB	miR-195	COPS2	-0.12356	0.702031	0.335178	0.286865	0.427313	0.165886
	circPHKB	miR-195	ENG	-0.12356	0.702031	-0.650756	0.0219236	-0.183856	0.567323
	circPHKB	miR-195	FOXN2	-0.12356	0.702031	0.395875	0.202711	0.392905	0.206428
	circPHKB	miR-195	LAMP2	-0.12356	0.702031	0.240819	0.450859	0.559555	0.0585266
	circPHKB	miR-195	MAFF	-0.12356	0.702031	-0.28346	0.371956	-0.42124	0.172643
	circPHKB	miR-195	MYOD1	-0.12356	0.702031	-0.333852	0.288895	0.19905	0.535122
	circTRIP11	miR-195	ATF3	-0.318294	0.313316	0.063159	0.845393	0.116325	0.718834
	circTRIP11	miR-195	COPS2	-0.318294	0.313316	0.335178	0.286865	0.175081	0.586267
	circTRIP11	miR-195	ENG	-0.318294	0.313316	-0.650756	0.0219236	-0.24903	0.435081
	circTRIP11	miR-195	FOXN2	-0.318294	0.313316	0.395875	0.202711	0.0284475	0.930068
	circTRIP11	miR-195	LAMP2	-0.318294	0.313316	0.240819	0.450859	0.18999	0.554231
	circTRIP11	miR-195	MAFF	-0.318294	0.313316	-0.28346	0.371956	-0.441857	0.150392
	circTRIP11	miR-195	MYOD1	-0.318294	0.313316	-0.333852	0.288895	-0.110232	0.733072
	circAGL	miR-199b-5p	ATF3	-0.197446	0.538486	0.345201	0.271784	0.417026	0.177432
	circAGL	miR-199b-5p	CALCRL	-0.197446	0.538486	-0.169702	0.597999	-0.0282849	0.930467
	circAGL	miR-199b-5p	ITGA8	-0.197446	0.538486	0.296189	0.349903	0.0976838	0.762639
	circAGL	miR-199b-5p	MYOD1	-0.197446	0.538486	0.126894	0.694329	-0.40129	0.196041
	circAGL	miR-199b-5p	RB1	-0.197446	0.538486	-0.15619	0.627858	0.0219305	0.946065
	circMYO18B	miR-199b-5p	ATF3	0.512651	0.0883336	0.345201	0.271784	0.345395	0.271496
	circMYO18B	miR-199b-5p	CALCRL	0.512651	0.0883336	-0.169702	0.597999	0.12668	0.694824
	circMYO18B	miR-199b-5p	ITGA8	0.512651	0.0883336	0.296189	0.349903	0.537859	0.0712722
	circMYO18B	miR-199b-5p	MYOD1	0.512651	0.0883336	0.126894	0.694329	0.0115871	0.97149
	circMYO18B	miR-199b-5p	RB1	0.512651	0.0883336	-0.15619	0.627858	0.27158	0.393172
	circPARD3	miR-199b-5p	ATF3	-0.244803	0.443171	0.345201	0.271784	-0.500885	0.0971669
	circPARD3	miR-199b-5p	CALCRL	-0.244803	0.443171	-0.169702	0.597999	0.415271	0.17945
	circPARD3	miR-199b-5p	ITGA8	-0.244803	0.443171	0.296189	0.349903	0.198096	0.537122
	circPARD3	miR-199b-5p	MYOD1	-0.244803	0.443171	0.126894	0.694329	0.579846	0.0481297
	circPARD3	miR-199b-5p	RB1	-0.244803	0.443171	-0.15619	0.627858	0.296629	0.349153
	circTRIP11	miR-199b-5p	ATF3	0.461227	0.131242	0.345201	0.271784	0.116325	0.718834
	circTRIP11	miR-199b-5p	CALCRL	0.461227	0.131242	-0.169702	0.597999	-0.116741	0.717864
	circTRIP11	miR-199b-5p	ITGA8	0.461227	0.131242	0.296189	0.349903	0.267611	0.400394
	circTRIP11	miR-199b-5p	MYOD1	0.461227	0.131242	0.126894	0.694329	-0.110232	0.733072
	circTRIP11	miR-199b-5p	RB1	0.461227	0.131242	-0.15619	0.627858	0.111719	0.72959
	circEMC2	miR-19a	CALCRL	-0.185206	0.564431	-0.4301	0.162842	0.405623	0.190802
	circEMC2	miR-19a	CFL2	-0.185206	0.564431	-0.274127	0.388573	0.397679	0.200473
	circEMC2	miR-19a	ID2	-0.185206	0.564431	0.148928	0.644121	-0.0913133	0.777763
	circEMC2	miR-19a	MEF2D	-0.185206	0.564431	0.57704	0.0494834	-0.703029	0.0107614
	circKANSL1L_3	miR-19a	CALCRL	0.0814097	0.801416	-0.4301	0.162842	0.109006	0.735949
	circKANSL1L_3	miR-19a	CFL2	0.0814097	0.801416	-0.274127	0.388573	0.297033	0.348465
	circKANSL1L_3	miR-19a	ID2	0.0814097	0.801416	0.148928	0.644121	-0.345498	0.271345
	circKANSL1L_3	miR-19a	MEF2D	0.0814097	0.801416	0.57704	0.0494834	-0.476442	0.117368
	circKANSL1L_2	miR-19a	CALCRL	-0.0522135	0.871972	-0.4301	0.162842	-0.0066103	0.983733
	circKANSL1L_2	miR-19a	CFL2	-0.0522135	0.871972	-0.274127	0.388573	0.112245	0.728361
	circKANSL1L_2	miR-19a	ID2	-0.0522135	0.871972	0.148928	0.644121	-0.495001	0.101799
	circKANSL1L_2	miR-19a	MEF2D	-0.0522135	0.871972	0.57704	0.0494834	-0.614941	0.033333
	circKANSL1L	miR-19a	CALCRL	0.00684707	0.983151	-0.4301	0.162842	-0.0405334	0.900468
	circKANSL1L	miR-19a	CFL2	0.00684707	0.983151	-0.274127	0.388573	0.196387	0.54071
	circKANSL1L	miR-19a	ID2	0.00684707	0.983151	0.148928	0.644121	-0.485169	0.109864
	circKANSL1L	miR-19a	MEF2D	0.00684707	0.983151	0.57704	0.0494834	-0.580062	0.0480263
	circEMC2	miR-19b	CALCRL	-0.102499	0.751257	-0.387906	0.212778	0.405623	0.190802
	circEMC2	miR-19b	CFL2	-0.102499	0.751257	-0.228255	0.475516	0.397679	0.200473
	circEMC2	miR-19b	ID2	-0.102499	0.751257	0.236245	0.459764	-0.0913133	0.777763
	circEMC2	miR-19b	MEF2D	-0.102499	0.751257	0.575226	0.0503726	-0.703029	0.0107614
	circKANSL1L_3	miR-19b	CALCRL	0.0881493	0.785302	-0.387906	0.212778	0.109006	0.735949
	circKANSL1L_3	miR-19b	CFL2	0.0881493	0.785302	-0.228255	0.475516	0.297033	0.348465
	circKANSL1L_3	miR-19b	ID2	0.0881493	0.785302	0.236245	0.459764	-0.345498	0.271345
	circKANSL1L_3	miR-19b	MEF2D	0.0881493	0.785302	0.575226	0.0503726	-0.476442	0.117368
	circKANSL1L_2	miR-19b	CALCRL	-0.0254832	0.937342	-0.387906	0.212778	-0.0066103	0.983733
	circKANSL1L_2	miR-19b	CFL2	-0.0254832	0.937342	-0.228255	0.475516	0.112245	0.728361
	circKANSL1L_2	miR-19b	ID2	-0.0254832	0.937342	0.236245	0.459764	-0.495001	0.101799
	circKANSL1L_2	miR-19b	MEF2D	-0.0254832	0.937342	0.575226	0.0503726	-0.614941	0.033333
	circKANSL1L	miR-19b	CALCRL	0.0532541	0.869439	-0.387906	0.212778	-0.0405334	0.900468
	circKANSL1L	miR-19b	CFL2	0.0532541	0.869439	-0.228255	0.475516	0.196387	0.54071
	circKANSL1L	miR-19b	ID2	0.0532541	0.869439	0.236245	0.459764	-0.485169	0.109864
	circKANSL1L	miR-19b	MEF2D	0.0532541	0.869439	0.575226	0.0503726	-0.580062	0.0480263
	circGPAT3	miR-214	CALCRL	-0.0430115	0.894412	-0.238604	0.455161	0.264726	0.405686
	circGPAT3	miR-214	COPS2	-0.0430115	0.894412	-0.166572	0.604867	0.114203	0.723784
	circGPAT3	miR-214	ENG	-0.0430115	0.894412	0.444711	0.147465	0.410284	0.185263
	circGPAT3	miR-214	MAFF	-0.0430115	0.894412	0.349274	0.265789	0.513066	0.0880321
	circGPAT3	miR-214	MEF2D	-0.0430115	0.894412	0.463966	0.128669	0.460273	0.132146
	circGPAT3	miR-214	TIPARP	-0.0430115	0.894412	-0.078797	0.807682	0.205368	0.521965
	circPTBP1	miR-214	CALCRL	-0.060124	0.852749	-0.238604	0.455161	-0.174777	0.586929
	circPTBP1	miR-214	COPS2	-0.060124	0.852749	-0.166572	0.604867	0.0345198	0.915184
	circPTBP1	miR-214	ENG	-0.060124	0.852749	0.444711	0.147465	-0.217535	0.497031
	circPTBP1	miR-214	MAFF	-0.060124	0.852749	0.349274	0.265789	-0.648023	0.0226759
	circPTBP1	miR-214	MEF2D	-0.060124	0.852749	0.463966	0.128669	-0.499539	0.0982138
	circPTBP1	miR-214	TIPARP	-0.060124	0.852749	-0.078797	0.807682	0.00820574	0.979808
	circKANSL1L_3	miR-218	FOXN2	0.0886547	0.784097	-0.350423	0.264112	0.282208	0.374162
	circKANSL1L_3	miR-218	LAMP2	0.0886547	0.784097	-0.0881517	0.785296	0.387421	0.213399
	circKANSL1L_3	miR-218	MEF2D	0.0886547	0.784097	0.554752	0.0611997	-0.476442	0.117368
	circKANSL1L_3	miR-218	MSTN	0.0886547	0.784097	0.141517	0.66087	0.783678	0.00256096
	circKANSL1L_3	miR-218	MYOD1	0.0886547	0.784097	0.503606	0.0950735	0.0793292	0.806405
	circTRIP11	miR-218	FOXN2	0.178461	0.578943	-0.350423	0.264112	0.0284475	0.930068
	circTRIP11	miR-218	LAMP2	0.178461	0.578943	-0.0881517	0.785296	0.18999	0.554231
	circTRIP11	miR-218	MEF2D	0.178461	0.578943	0.554752	0.0611997	-0.487753	0.107705
	circTRIP11	miR-218	MSTN	0.178461	0.578943	0.141517	0.66087	0.705061	0.0104379
	circTRIP11	miR-218	MYOD1	0.178461	0.578943	0.503606	0.0950735	-0.110232	0.733072
	circKANSL1L_3	miR-218-5p	FOXN2	0.0886547	0.784097	-0.350423	0.264112	0.282208	0.374162
	circKANSL1L_3	miR-218-5p	LAMP2	0.0886547	0.784097	-0.0881517	0.785296	0.387421	0.213399
	circKANSL1L_3	miR-218-5p	MEF2D	0.0886547	0.784097	0.554752	0.0611997	-0.476442	0.117368
	circKANSL1L_3	miR-218-5p	MSTN	0.0886547	0.784097	0.141517	0.66087	0.783678	0.00256096
	circKANSL1L_3	miR-218-5p	MYOD1	0.0886547	0.784097	0.503606	0.0950735	0.0793292	0.806405
	circTRIP11	miR-218-5p	FOXN2	0.178461	0.578943	-0.350423	0.264112	0.0284475	0.930068
	circTRIP11	miR-218-5p	LAMP2	0.178461	0.578943	-0.0881517	0.785296	0.18999	0.554231
	circTRIP11	miR-218-5p	MEF2D	0.178461	0.578943	0.554752	0.0611997	-0.487753	0.107705
	circTRIP11	miR-218-5p	MSTN	0.178461	0.578943	0.141517	0.66087	0.705061	0.0104379
	circTRIP11	miR-218-5p	MYOD1	0.178461	0.578943	0.503606	0.0950735	-0.110232	0.733072
	circKANSL1L_3	miR-218b	FOXN2	0.0908389	0.778893	-0.350433	0.264097	0.282208	0.374162
	circKANSL1L_3	miR-218b	LAMP2	0.0908389	0.778893	-0.0879175	0.785855	0.387421	0.213399
	circKANSL1L_3	miR-218b	MEF2D	0.0908389	0.778893	0.553634	0.0618335	-0.476442	0.117368
	circKANSL1L_3	miR-218b	MSTN	0.0908389	0.778893	0.142852	0.657842	0.783678	0.00256096
	circKANSL1L_3	miR-218b	MYOD1	0.0908389	0.778893	0.502899	0.0956144	0.0793292	0.806405
	circTRIP11	miR-218b	FOXN2	0.180724	0.574056	-0.350433	0.264097	0.0284475	0.930068
	circTRIP11	miR-218b	LAMP2	0.180724	0.574056	-0.0879175	0.785855	0.18999	0.554231
	circTRIP11	miR-218b	MEF2D	0.180724	0.574056	0.553634	0.0618335	-0.487753	0.107705
	circTRIP11	miR-218b	MSTN	0.180724	0.574056	0.142852	0.657842	0.705061	0.0104379
	circTRIP11	miR-218b	MYOD1	0.180724	0.574056	0.502899	0.0956144	-0.110232	0.733072
	circAMOTL1	miR-22-3p	ENG	-0.153572	0.633704	-0.522763	0.0811887	-0.434584	0.158019
	circEMC2	miR-22-3p	ENG	-0.194991	0.543648	-0.522763	0.0811887	-0.483097	0.111616
	circPFKFB1	miR-22-3p	ENG	-0.0982377	0.761327	-0.522763	0.0811887	-0.403833	0.192955
	circPFKFB1_2	miR-22-3p	ENG	-0.3834	0.2186	-0.522763	0.0811887	-0.140746	0.662619
	circTRIP11	miR-22-3p	ENG	-0.420638	0.173322	-0.522763	0.0811887	-0.24903	0.435081
	circAMOTL1	miR-22-3p	MAFF	-0.153572	0.633704	-0.114549	0.722977	-0.67332	0.0163896
	circEMC2	miR-22-3p	MAFF	-0.194991	0.543648	-0.114549	0.722977	-0.235155	0.461898
	circPFKFB1	miR-22-3p	MAFF	-0.0982377	0.761327	-0.114549	0.722977	-0.75056	0.00491431
	circPFKFB1_2	miR-22-3p	MAFF	-0.3834	0.2186	-0.114549	0.722977	-0.35155	0.262472
	circTRIP11	miR-22-3p	MAFF	-0.420638	0.173322	-0.114549	0.722977	-0.441857	0.150392
	circAGL	miR-22-5p	COPS2	-0.0144782	0.96438	0.419556	0.174547	0.0908156	0.778948
	circAGL_2	miR-22-5p	COPS2	0.0917572	0.776707	0.419556	0.174547	0.135508	0.674554
	circLIMCH1	miR-22-5p	COPS2	0.17642	0.583361	0.419556	0.174547	0.351515	0.262523
	circZMYM4	miR-22-5p	COPS2	-0.402016	0.195157	0.419556	0.174547	0.379776	0.223353
	circTRIP11	miR-22-5p	COPS2	-0.405272	0.191223	0.419556	0.174547	0.175081	0.586267
	circAGL	miR-22-5p	MEF2D	-0.0144782	0.96438	-0.381325	0.221314	-0.654609	0.0208941
	circAGL_2	miR-22-5p	MEF2D	0.0917572	0.776707	-0.381325	0.221314	-0.646773	0.0230259
	circLIMCH1	miR-22-5p	MEF2D	0.17642	0.583361	-0.381325	0.221314	-0.696126	0.0119162
	circZMYM4	miR-22-5p	MEF2D	-0.402016	0.195157	-0.381325	0.221314	-0.57193	0.0520167
	circTRIP11	miR-22-5p	MEF2D	-0.405272	0.191223	-0.381325	0.221314	-0.487753	0.107705
	circWWP1	miR-24-3p	DLG1	-0.0652442	0.840346	-0.282675	0.373338	0.368524	0.238501
	circWWP1	miR-24-3p	MAFF	-0.0652442	0.840346	0.335178	0.286865	-0.541429	0.0690549
	circWWP1	miR-24-3p	MEF2D	-0.0652442	0.840346	0.62798	0.0287774	-0.483293	0.11145
	circWWP1	miR-24-3p	MYOD1	-0.0652442	0.840346	0.51972	0.0832962	-0.10627	0.742375
	circTRIP11	miR-24-3p	DLG1	0.0837994	0.795694	-0.282675	0.373338	0.44287	0.149348
	circTRIP11	miR-24-3p	MAFF	0.0837994	0.795694	0.335178	0.286865	-0.441857	0.150392
	circTRIP11	miR-24-3p	MEF2D	0.0837994	0.795694	0.62798	0.0287774	-0.487753	0.107705
	circTRIP11	miR-24-3p	MYOD1	0.0837994	0.795694	0.51972	0.0832962	-0.110232	0.733072
	circSDAD1	miR-27b-5p	MAFF	0.429111	0.163919	0.251029	0.431282	-0.184125	0.566748
	circSDAD1	miR-27b-5p	MEF2D	0.429111	0.163919	0.392797	0.206564	-0.455384	0.136842
	circSNRK	miR-27b-5p	MAFF	-0.489681	0.106112	0.251029	0.431282	-0.0517991	0.872981
	circSNRK	miR-27b-5p	MEF2D	-0.489681	0.106112	0.392797	0.206564	-0.614957	0.033327
	circFAM188A	miR-28-5p	ENG	-0.700849	0.0111167	0.680647	0.0148368	-0.600118	0.039114
	circFAM188A	miR-28-5p	MEF2D	-0.700849	0.0111167	0.716592	0.00873719	-0.803353	0.00164734
	circFAM188A	miR-28-5p	MYOD1	-0.700849	0.0111167	0.120028	0.71022	-0.28884	0.362548
	circFAM188A	miR-28-5p	NR4A3	-0.700849	0.0111167	0.766492	0.00363767	-0.61004	0.0351717
	circFAM188A	miR-28-5p	PFKM	-0.700849	0.0111167	-0.688969	0.0132079	0.825512	0.000942796
	circFAM188A	miR-28-5p	PLAGL1	-0.700849	0.0111167	-0.16857	0.60048	-0.381014	0.221722
	circMYBPC2	miR-28-5p	ENG	-0.358833	0.252021	0.680647	0.0148368	-0.175929	0.584426
	circMYBPC2	miR-28-5p	MEF2D	-0.358833	0.252021	0.716592	0.00873719	-0.506379	0.092972
	circMYBPC2	miR-28-5p	MYOD1	-0.358833	0.252021	0.120028	0.71022	-0.27542	0.386249
	circMYBPC2	miR-28-5p	NR4A3	-0.358833	0.252021	0.766492	0.00363767	-0.242007	0.44856
	circMYBPC2	miR-28-5p	PFKM	-0.358833	0.252021	-0.688969	0.0132079	0.724492	0.00769781
	circMYBPC2	miR-28-5p	PLAGL1	-0.358833	0.252021	-0.16857	0.60048	-0.552373	0.0625544
	circSDAD1	miR-28-5p	ENG	-0.559815	0.0583845	0.680647	0.0148368	-0.186694	0.561251
	circSDAD1	miR-28-5p	MEF2D	-0.559815	0.0583845	0.716592	0.00873719	-0.455384	0.136842
	circSDAD1	miR-28-5p	MYOD1	-0.559815	0.0583845	0.120028	0.71022	0.0896567	0.781708
	circSDAD1	miR-28-5p	NR4A3	-0.559815	0.0583845	0.766492	0.00363767	-0.205237	0.522238
	circSDAD1	miR-28-5p	PFKM	-0.559815	0.0583845	-0.688969	0.0132079	0.777361	0.00292365
	circSDAD1	miR-28-5p	PLAGL1	-0.559815	0.0583845	-0.16857	0.60048	-0.0782009	0.809113
	circUBE3A	miR-28-5p	ENG	-0.380351	0.222594	0.680647	0.0148368	-0.00638625	0.984285
	circUBE3A	miR-28-5p	MEF2D	-0.380351	0.222594	0.716592	0.00873719	-0.298356	0.346218
	circUBE3A	miR-28-5p	MYOD1	-0.380351	0.222594	0.120028	0.71022	0.534301	0.0735302
	circUBE3A	miR-28-5p	NR4A3	-0.380351	0.222594	0.766492	0.00363767	-0.204547	0.523668
	circUBE3A	miR-28-5p	PFKM	-0.380351	0.222594	-0.688969	0.0132079	0.657305	0.020195
	circUBE3A	miR-28-5p	PLAGL1	-0.380351	0.222594	-0.16857	0.60048	0.208451	0.515597
	circLIMCH1	miR-296-3p	ATF3	-0.38228	0.220062	0.0877995	0.786136	0.370399	0.235935
	circLIMCH1	miR-296-3p	ENG	-0.38228	0.220062	0.743217	0.00560511	-0.455418	0.136809
	circLIMCH1	miR-296-3p	MAFF	-0.38228	0.220062	0.318252	0.313384	-0.600303	0.0390377
	circLIMCH1	miR-296-3p	MEF2D	-0.38228	0.220062	0.597647	0.0401428	-0.696126	0.0119162
	circLIMCH1	miR-296-3p	TIPARP	-0.38228	0.220062	-0.208602	0.515286	0.345048	0.272011
	circCAMK2D	miR-299	CALCRL	0.490162	0.105717	-0.207362	0.517844	-0.0688239	0.831694
	circCAMK2D	miR-299	ENG	0.490162	0.105717	0.404065	0.192675	-0.0236264	0.9419
	circCAMK2D	miR-299	MSTN	0.490162	0.105717	0.45297	0.1392	0.746531	0.00528486
	circCAMK2D	miR-299	TIPARP	0.490162	0.105717	0.0932106	0.773251	0.404989	0.191562
	circKANSL1L_3	miR-299	CALCRL	0.405476	0.190978	-0.207362	0.517844	0.109006	0.735949
	circKANSL1L_3	miR-299	ENG	0.405476	0.190978	0.404065	0.192675	-0.209617	0.513196
	circKANSL1L_3	miR-299	MSTN	0.405476	0.190978	0.45297	0.1392	0.783678	0.00256096
	circKANSL1L_3	miR-299	TIPARP	0.405476	0.190978	0.0932106	0.773251	0.543958	0.0675132
	circKANSL1L_2	miR-299	CALCRL	0.467066	0.125798	-0.207362	0.517844	-0.0066103	0.983733
	circKANSL1L_2	miR-299	ENG	0.467066	0.125798	0.404065	0.192675	-0.297518	0.347641
	circKANSL1L_2	miR-299	MSTN	0.467066	0.125798	0.45297	0.1392	0.797442	0.00189002
	circKANSL1L_2	miR-299	TIPARP	0.467066	0.125798	0.0932106	0.773251	0.371118	0.234956
	circKANSL1L	miR-299	CALCRL	0.516746	0.0853909	-0.207362	0.517844	-0.0405334	0.900468
	circKANSL1L	miR-299	ENG	0.516746	0.0853909	0.404065	0.192675	-0.305955	0.333468
	circKANSL1L	miR-299	MSTN	0.516746	0.0853909	0.45297	0.1392	0.781248	0.00269614
	circKANSL1L	miR-299	TIPARP	0.516746	0.0853909	0.0932106	0.773251	0.349676	0.265202
	circTRIP11	miR-299	CALCRL	0.472704	0.120682	-0.207362	0.517844	-0.116741	0.717864
	circTRIP11	miR-299	ENG	0.472704	0.120682	0.404065	0.192675	-0.24903	0.435081
	circTRIP11	miR-299	MSTN	0.472704	0.120682	0.45297	0.1392	0.705061	0.0104379
	circTRIP11	miR-299	TIPARP	0.472704	0.120682	0.0932106	0.773251	0.298682	0.345667
	circLIMCH1	miR-29c	ENG	0.18081	0.573873	-0.29152	0.357909	-0.455418	0.136809
	circLIMCH1	miR-29c	MSTN	0.18081	0.573873	0.125965	0.696474	0.534419	0.0734541
	circKANSL1L_3	miR-30a-3p	CALCRL	0.143513	0.656345	0.808705	0.00144891	0.109006	0.735949
	circKANSL1L_3	miR-30a-3p	COPS2	0.143513	0.656345	0.712778	0.00927486	0.377846	0.225909
	circKANSL1L_3	miR-30a-3p	DLG1	0.143513	0.656345	0.541489	0.0690175	0.599054	0.039555
	circKANSL1L_3	miR-30a-3p	ITGA8	0.143513	0.656345	0.558093	0.0593313	0.414425	0.180429
	circKANSL1L_3	miR-30a-3p	MEF2D	0.143513	0.656345	-0.567457	0.054308	-0.476442	0.117368
	circKANSL1L_3	miR-30a-3p	MSTN	0.143513	0.656345	0.117729	0.715564	0.783678	0.00256096
	circKANSL1L_3	miR-30a-3p	MYOD1	0.143513	0.656345	-0.104655	0.746175	0.0793292	0.806405
	circKANSL1L_3	miR-30a-3p	NR4A3	0.143513	0.656345	-0.741315	0.00579542	-0.348457	0.266985
	circKANSL1L_3	miR-30a-3p	TIPARP	0.143513	0.656345	0.577463	0.0492774	0.543958	0.0675132
	circKANSL1L_2	miR-30a-3p	CALCRL	-0.0152072	0.962588	0.808705	0.00144891	-0.0066103	0.983733
	circKANSL1L_2	miR-30a-3p	COPS2	-0.0152072	0.962588	0.712778	0.00927486	0.302301	0.339567
	circKANSL1L_2	miR-30a-3p	DLG1	-0.0152072	0.962588	0.541489	0.0690175	0.597417	0.0402396
	circKANSL1L_2	miR-30a-3p	ITGA8	-0.0152072	0.962588	0.558093	0.0593313	0.379355	0.223909
	circKANSL1L_2	miR-30a-3p	MEF2D	-0.0152072	0.962588	-0.567457	0.054308	-0.614941	0.033333
	circKANSL1L_2	miR-30a-3p	MSTN	-0.0152072	0.962588	0.117729	0.715564	0.797442	0.00189002
	circKANSL1L_2	miR-30a-3p	MYOD1	-0.0152072	0.962588	-0.104655	0.746175	-0.0601518	0.852682
	circKANSL1L_2	miR-30a-3p	NR4A3	-0.0152072	0.962588	-0.741315	0.00579542	-0.425572	0.167806
	circKANSL1L_2	miR-30a-3p	TIPARP	-0.0152072	0.962588	0.577463	0.0492774	0.371118	0.234956
	circKANSL1L	miR-30a-3p	CALCRL	0.00435921	0.989273	0.808705	0.00144891	-0.0405334	0.900468
	circKANSL1L	miR-30a-3p	COPS2	0.00435921	0.989273	0.712778	0.00927486	0.240711	0.451068
	circKANSL1L	miR-30a-3p	DLG1	0.00435921	0.989273	0.541489	0.0690175	0.531205	0.0755346
	circKANSL1L	miR-30a-3p	ITGA8	0.00435921	0.989273	0.558093	0.0593313	0.289639	0.361162
	circKANSL1L	miR-30a-3p	MEF2D	0.00435921	0.989273	-0.567457	0.054308	-0.580062	0.0480263
	circKANSL1L	miR-30a-3p	MSTN	0.00435921	0.989273	0.117729	0.715564	0.781248	0.00269614
	circKANSL1L	miR-30a-3p	MYOD1	0.00435921	0.989273	-0.104655	0.746175	-0.0282572	0.930535
	circKANSL1L	miR-30a-3p	NR4A3	0.00435921	0.989273	-0.741315	0.00579542	-0.417471	0.176922
	circKANSL1L	miR-30a-3p	TIPARP	0.00435921	0.989273	0.577463	0.0492774	0.349676	0.265202
	circTRIP11	miR-30a-3p	CALCRL	-0.0386454	0.905085	0.808705	0.00144891	-0.116741	0.717864
	circTRIP11	miR-30a-3p	COPS2	-0.0386454	0.905085	0.712778	0.00927486	0.175081	0.586267
	circTRIP11	miR-30a-3p	DLG1	-0.0386454	0.905085	0.541489	0.0690175	0.44287	0.149348
	circTRIP11	miR-30a-3p	ITGA8	-0.0386454	0.905085	0.558093	0.0593313	0.267611	0.400394
	circTRIP11	miR-30a-3p	MEF2D	-0.0386454	0.905085	-0.567457	0.054308	-0.487753	0.107705
	circTRIP11	miR-30a-3p	MSTN	-0.0386454	0.905085	0.117729	0.715564	0.705061	0.0104379
	circTRIP11	miR-30a-3p	MYOD1	-0.0386454	0.905085	-0.104655	0.746175	-0.110232	0.733072
	circTRIP11	miR-30a-3p	NR4A3	-0.0386454	0.905085	-0.741315	0.00579542	-0.301044	0.341679
	circTRIP11	miR-30a-3p	TIPARP	-0.0386454	0.905085	0.577463	0.0492774	0.298682	0.345667
	circWWP1	miR-30a-3p	CALCRL	-0.239442	0.453531	0.808705	0.00144891	-0.212591	0.507097
	circWWP1	miR-30a-3p	COPS2	-0.239442	0.453531	0.712778	0.00927486	0.0224676	0.944746
	circWWP1	miR-30a-3p	DLG1	-0.239442	0.453531	0.541489	0.0690175	0.368524	0.238501
	circWWP1	miR-30a-3p	ITGA8	-0.239442	0.453531	0.558093	0.0593313	0.186631	0.561385
	circWWP1	miR-30a-3p	MEF2D	-0.239442	0.453531	-0.567457	0.054308	-0.483293	0.11145
	circWWP1	miR-30a-3p	MSTN	-0.239442	0.453531	0.117729	0.715564	0.547715	0.0652669
	circWWP1	miR-30a-3p	MYOD1	-0.239442	0.453531	-0.104655	0.746175	-0.10627	0.742375
	circWWP1	miR-30a-3p	NR4A3	-0.239442	0.453531	-0.741315	0.00579542	-0.299446	0.344373
	circWWP1	miR-30a-3p	TIPARP	-0.239442	0.453531	0.577463	0.0492774	0.0759924	0.81442
	circKANSL1L_3	miR-30e-3p	CALCRL	0.149265	0.643364	0.788379	0.00231415	0.109006	0.735949
	circKANSL1L_3	miR-30e-3p	COPS2	0.149265	0.643364	0.68815	0.013362	0.377846	0.225909
	circKANSL1L_3	miR-30e-3p	DLG1	0.149265	0.643364	0.5225	0.0813699	0.599054	0.039555
	circKANSL1L_3	miR-30e-3p	ITGA8	0.149265	0.643364	0.539621	0.0701715	0.414425	0.180429
	circKANSL1L_3	miR-30e-3p	MEF2D	0.149265	0.643364	-0.593675	0.0418367	-0.476442	0.117368
	circKANSL1L_3	miR-30e-3p	MSTN	0.149265	0.643364	0.125747	0.696976	0.783678	0.00256096
	circKANSL1L_3	miR-30e-3p	MYOD1	0.149265	0.643364	-0.139676	0.665051	0.0793292	0.806405
	circKANSL1L_3	miR-30e-3p	NR4A3	0.149265	0.643364	-0.752555	0.00473824	-0.348457	0.266985
	circKANSL1L_3	miR-30e-3p	TIPARP	0.149265	0.643364	0.568137	0.0539555	0.543958	0.0675132
	circKANSL1L_2	miR-30e-3p	CALCRL	-0.009745	0.976021	0.788379	0.00231415	-0.0066103	0.983733
	circKANSL1L_2	miR-30e-3p	COPS2	-0.009745	0.976021	0.68815	0.013362	0.302301	0.339567
	circKANSL1L_2	miR-30e-3p	DLG1	-0.009745	0.976021	0.5225	0.0813699	0.597417	0.0402396
	circKANSL1L_2	miR-30e-3p	ITGA8	-0.009745	0.976021	0.539621	0.0701715	0.379355	0.223909
	circKANSL1L_2	miR-30e-3p	MEF2D	-0.009745	0.976021	-0.593675	0.0418367	-0.614941	0.033333
	circKANSL1L_2	miR-30e-3p	MSTN	-0.009745	0.976021	0.125747	0.696976	0.797442	0.00189002
	circKANSL1L_2	miR-30e-3p	MYOD1	-0.009745	0.976021	-0.139676	0.665051	-0.0601518	0.852682
	circKANSL1L_2	miR-30e-3p	NR4A3	-0.009745	0.976021	-0.752555	0.00473824	-0.425572	0.167806
	circKANSL1L_2	miR-30e-3p	TIPARP	-0.009745	0.976021	0.568137	0.0539555	0.371118	0.234956
	circKANSL1L	miR-30e-3p	CALCRL	0.0212972	0.947621	0.788379	0.00231415	-0.0405334	0.900468
	circKANSL1L	miR-30e-3p	COPS2	0.0212972	0.947621	0.68815	0.013362	0.240711	0.451068
	circKANSL1L	miR-30e-3p	DLG1	0.0212972	0.947621	0.5225	0.0813699	0.531205	0.0755346
	circKANSL1L	miR-30e-3p	ITGA8	0.0212972	0.947621	0.539621	0.0701715	0.289639	0.361162
	circKANSL1L	miR-30e-3p	MEF2D	0.0212972	0.947621	-0.593675	0.0418367	-0.580062	0.0480263
	circKANSL1L	miR-30e-3p	MSTN	0.0212972	0.947621	0.125747	0.696976	0.781248	0.00269614
	circKANSL1L	miR-30e-3p	MYOD1	0.0212972	0.947621	-0.139676	0.665051	-0.0282572	0.930535
	circKANSL1L	miR-30e-3p	NR4A3	0.0212972	0.947621	-0.752555	0.00473824	-0.417471	0.176922
	circKANSL1L	miR-30e-3p	TIPARP	0.0212972	0.947621	0.568137	0.0539555	0.349676	0.265202
	circTRIP11	miR-30e-3p	CALCRL	-0.027863	0.931502	0.788379	0.00231415	-0.116741	0.717864
	circTRIP11	miR-30e-3p	COPS2	-0.027863	0.931502	0.68815	0.013362	0.175081	0.586267
	circTRIP11	miR-30e-3p	DLG1	-0.027863	0.931502	0.5225	0.0813699	0.44287	0.149348
	circTRIP11	miR-30e-3p	ITGA8	-0.027863	0.931502	0.539621	0.0701715	0.267611	0.400394
	circTRIP11	miR-30e-3p	MEF2D	-0.027863	0.931502	-0.593675	0.0418367	-0.487753	0.107705
	circTRIP11	miR-30e-3p	MSTN	-0.027863	0.931502	0.125747	0.696976	0.705061	0.0104379
	circTRIP11	miR-30e-3p	MYOD1	-0.027863	0.931502	-0.139676	0.665051	-0.110232	0.733072
	circTRIP11	miR-30e-3p	NR4A3	-0.027863	0.931502	-0.752555	0.00473824	-0.301044	0.341679
	circTRIP11	miR-30e-3p	TIPARP	-0.027863	0.931502	0.568137	0.0539555	0.298682	0.345667
	circWWP1	miR-30e-3p	CALCRL	-0.22156	0.488901	0.788379	0.00231415	-0.212591	0.507097
	circWWP1	miR-30e-3p	COPS2	-0.22156	0.488901	0.68815	0.013362	0.0224676	0.944746
	circWWP1	miR-30e-3p	DLG1	-0.22156	0.488901	0.5225	0.0813699	0.368524	0.238501
	circWWP1	miR-30e-3p	ITGA8	-0.22156	0.488901	0.539621	0.0701715	0.186631	0.561385
	circWWP1	miR-30e-3p	MEF2D	-0.22156	0.488901	-0.593675	0.0418367	-0.483293	0.11145
	circWWP1	miR-30e-3p	MSTN	-0.22156	0.488901	0.125747	0.696976	0.547715	0.0652669
	circWWP1	miR-30e-3p	MYOD1	-0.22156	0.488901	-0.139676	0.665051	-0.10627	0.742375
	circWWP1	miR-30e-3p	NR4A3	-0.22156	0.488901	-0.752555	0.00473824	-0.299446	0.344373
	circWWP1	miR-30e-3p	TIPARP	-0.22156	0.488901	0.568137	0.0539555	0.0759924	0.81442
	circAGO4	miR-323	COPS2	-0.135459	0.674666	-0.14375	0.655807	0.243156	0.44634
	circAGO4	miR-323	FOXN2	-0.135459	0.674666	-0.23408	0.464008	0.430049	0.162897
	circAGO4	miR-323	MSTN	-0.135459	0.674666	0.315677	0.317533	-0.281342	0.375692
	circAGO4	miR-323	MTM1	-0.135459	0.674666	-0.207707	0.517131	0.239229	0.453946
	circPHKB	miR-335	CCL5	0.146495	0.649603	-0.292344	0.356488	0.245742	0.441368
	circPHKB	miR-335	COPS2	0.146495	0.649603	-0.269442	0.397055	0.427313	0.165886
	circPHKB	miR-335	ITGA8	0.146495	0.649603	-0.107807	0.738763	0.495473	0.101422
	circPHKB	miR-335	MEF2D	0.146495	0.649603	0.496229	0.10082	-0.609705	0.0352997
	circPHKB	miR-335	MYOD1	0.146495	0.649603	0.416305	0.178259	0.19905	0.535122
	circTRIP11	miR-335	CCL5	0.293825	0.353943	-0.292344	0.356488	0.147794	0.646676
	circTRIP11	miR-335	COPS2	0.293825	0.353943	-0.269442	0.397055	0.175081	0.586267
	circTRIP11	miR-335	ITGA8	0.293825	0.353943	-0.107807	0.738763	0.267611	0.400394
	circTRIP11	miR-335	MEF2D	0.293825	0.353943	0.496229	0.10082	-0.487753	0.107705
	circTRIP11	miR-335	MYOD1	0.293825	0.353943	0.416305	0.178259	-0.110232	0.733072
	circAMOTL1	miR-361-3p	CCL5	0.203337	0.52618	0.36587	0.24216	0.605702	0.0368586
	circAMOTL1	miR-361-3p	ENG	0.203337	0.52618	-0.621925	0.030833	-0.434584	0.158019
	circAMOTL1	miR-361-3p	MAFF	0.203337	0.52618	-0.0808648	0.802722	-0.67332	0.0163896
	circAMOTL1	miR-361-3p	MEF2D	0.203337	0.52618	-0.497979	0.0994366	-0.61271	0.0341612
	circAMOTL1	miR-361-3p	MYOD1	0.203337	0.52618	-0.505056	0.0939709	-0.492717	0.103636
	circGPAT3	miR-369	CALCRL	0.0258795	0.936369	-0.347504	0.268385	0.264726	0.405686
	circGPAT3	miR-369	CFL2	0.0258795	0.936369	-0.126423	0.695417	0.130903	0.685104
	circGPAT3	miR-369	DLG1	0.0258795	0.936369	0.0407341	0.899977	-0.0907728	0.77905
	circGPAT3	miR-369	FOXN2	0.0258795	0.936369	-0.165893	0.606362	0.313941	0.320348
	circGPAT3	miR-369	MSTN	0.0258795	0.936369	0.333507	0.289425	-0.136539	0.672198
	circLIMCH1	miR-370	ENG	-0.41661	0.177909	0.815874	0.00121251	-0.455418	0.136809
	circLIMCH1	miR-370	LAMP2	-0.41661	0.177909	-0.112287	0.728263	0.342748	0.275432
	circLIMCH1	miR-370	MEF2D	-0.41661	0.177909	0.642742	0.0241823	-0.696126	0.0119162
	circLIMCH1	miR-370	MYOD1	-0.41661	0.177909	0.513621	0.0876305	-0.191087	0.551902
	circLIMCH1	miR-370	NR4A3	-0.41661	0.177909	0.802224	0.0016917	-0.690497	0.0129239
	circPTBP1	miR-370	ENG	0.0717772	0.824569	0.815874	0.00121251	-0.217535	0.497031
	circPTBP1	miR-370	LAMP2	0.0717772	0.824569	-0.112287	0.728263	0.15078	0.639959
	circPTBP1	miR-370	MEF2D	0.0717772	0.824569	0.642742	0.0241823	-0.499539	0.0982138
	circPTBP1	miR-370	MYOD1	0.0717772	0.824569	0.513621	0.0876305	-0.152593	0.635894
	circPTBP1	miR-370	NR4A3	0.0717772	0.824569	0.802224	0.0016917	-0.376685	0.227455
	circZMYM4	miR-370	ENG	0.128363	0.690944	0.815874	0.00121251	-0.179039	0.577693
	circZMYM4	miR-370	LAMP2	0.128363	0.690944	-0.112287	0.728263	0.476896	0.116969
	circZMYM4	miR-370	MEF2D	0.128363	0.690944	0.642742	0.0241823	-0.57193	0.0520167
	circZMYM4	miR-370	MYOD1	0.128363	0.690944	0.513621	0.0876305	0.0579348	0.858062
	circZMYM4	miR-370	NR4A3	0.128363	0.690944	0.802224	0.0016917	-0.36963	0.236985
	circTRIP11	miR-370	ENG	0.0642066	0.842857	0.815874	0.00121251	-0.24903	0.435081
	circTRIP11	miR-370	LAMP2	0.0642066	0.842857	-0.112287	0.728263	0.18999	0.554231
	circTRIP11	miR-370	MEF2D	0.0642066	0.842857	0.642742	0.0241823	-0.487753	0.107705
	circTRIP11	miR-370	MYOD1	0.0642066	0.842857	0.513621	0.0876305	-0.110232	0.733072
	circTRIP11	miR-370	NR4A3	0.0642066	0.842857	0.802224	0.0016917	-0.301044	0.341679
	circKANSL1L_3	miR-376a-3p	CALCRL	0.269739	0.396513	-0.386645	0.214397	0.109006	0.735949
	circKANSL1L_3	miR-376a-3p	COPS2	0.269739	0.396513	-0.170113	0.5971	0.377846	0.225909
	circKANSL1L_3	miR-376a-3p	FOXN2	0.269739	0.396513	-0.181473	0.572444	0.282208	0.374162
	circKANSL1L_3	miR-376a-3p	MEF2D	0.269739	0.396513	0.423915	0.169646	-0.476442	0.117368
	circKANSL1L_2	miR-376a-3p	CALCRL	0.300971	0.341802	-0.386645	0.214397	-0.0066103	0.983733
	circKANSL1L_2	miR-376a-3p	COPS2	0.300971	0.341802	-0.170113	0.5971	0.302301	0.339567
	circKANSL1L_2	miR-376a-3p	FOXN2	0.300971	0.341802	-0.181473	0.572444	0.203041	0.526795
	circKANSL1L_2	miR-376a-3p	MEF2D	0.300971	0.341802	0.423915	0.169646	-0.614941	0.033333
	circKANSL1L	miR-376a-3p	CALCRL	0.31628	0.316559	-0.386645	0.214397	-0.0405334	0.900468
	circKANSL1L	miR-376a-3p	COPS2	0.31628	0.316559	-0.170113	0.5971	0.240711	0.451068
	circKANSL1L	miR-376a-3p	FOXN2	0.31628	0.316559	-0.181473	0.572444	0.146376	0.649871
	circKANSL1L	miR-376a-3p	MEF2D	0.31628	0.316559	0.423915	0.169646	-0.580062	0.0480263
	circTRIP11	miR-376a-3p	CALCRL	0.341779	0.276881	-0.386645	0.214397	-0.116741	0.717864
	circTRIP11	miR-376a-3p	COPS2	0.341779	0.276881	-0.170113	0.5971	0.175081	0.586267
	circTRIP11	miR-376a-3p	FOXN2	0.341779	0.276881	-0.181473	0.572444	0.0284475	0.930068
	circTRIP11	miR-376a-3p	MEF2D	0.341779	0.276881	0.423915	0.169646	-0.487753	0.107705
	circDCUN1D1	miR-382	CFL2	0.481931	0.11261	-0.0906754	0.779282	0.294156	0.353377
	circENPEP	miR-382	CFL2	0.0541455	0.867271	-0.0906754	0.779282	-0.0796472	0.805642
	circFAM188A	miR-382	CFL2	0.177115	0.581855	-0.0906754	0.779282	0.21583	0.500493
	circKANSL1L_3	miR-382	CFL2	0.467153	0.125718	-0.0906754	0.779282	0.297033	0.348465
	circKANSL1L_2	miR-382	CFL2	0.455153	0.137066	-0.0906754	0.779282	0.112245	0.728361
	circKANSL1L	miR-382	CFL2	0.453105	0.139067	-0.0906754	0.779282	0.196387	0.54071
	circKIF1B	miR-382	CFL2	0.321203	0.308666	-0.0906754	0.779282	0.0804795	0.803645
	circLIFR	miR-382	CFL2	-0.22759	0.476837	-0.0906754	0.779282	0.280003	0.378067
	circLIMCH1	miR-382	CFL2	-0.178713	0.578397	-0.0906754	0.779282	0.276535	0.384249
	circTRIP11	miR-382	CFL2	0.533883	0.0737984	-0.0906754	0.779282	0.0974044	0.7633
	circDCUN1D1	miR-382	COPS2	0.481931	0.11261	-0.0168865	0.958459	0.428908	0.16414
	circENPEP	miR-382	COPS2	0.0541455	0.867271	-0.0168865	0.958459	-0.12793	0.691941
	circFAM188A	miR-382	COPS2	0.177115	0.581855	-0.0168865	0.958459	0.37357	0.231634
	circKANSL1L_3	miR-382	COPS2	0.467153	0.125718	-0.0168865	0.958459	0.377846	0.225909
	circKANSL1L_2	miR-382	COPS2	0.455153	0.137066	-0.0168865	0.958459	0.302301	0.339567
	circKANSL1L	miR-382	COPS2	0.453105	0.139067	-0.0168865	0.958459	0.240711	0.451068
	circKIF1B	miR-382	COPS2	0.321203	0.308666	-0.0168865	0.958459	0.279449	0.379051
	circLIFR	miR-382	COPS2	-0.22759	0.476837	-0.0168865	0.958459	0.443973	0.148218
	circLIMCH1	miR-382	COPS2	-0.178713	0.578397	-0.0168865	0.958459	0.351515	0.262523
	circTRIP11	miR-382	COPS2	0.533883	0.0737984	-0.0168865	0.958459	0.175081	0.586267
	circDCUN1D1	miR-382	FOXN2	0.481931	0.11261	-0.117612	0.715837	0.277239	0.382991
	circENPEP	miR-382	FOXN2	0.0541455	0.867271	-0.117612	0.715837	0.0416596	0.897715
	circFAM188A	miR-382	FOXN2	0.177115	0.581855	-0.117612	0.715837	0.307899	0.330248
	circKANSL1L_3	miR-382	FOXN2	0.467153	0.125718	-0.117612	0.715837	0.282208	0.374162
	circKANSL1L_2	miR-382	FOXN2	0.455153	0.137066	-0.117612	0.715837	0.203041	0.526795
	circKANSL1L	miR-382	FOXN2	0.453105	0.139067	-0.117612	0.715837	0.146376	0.649871
	circKIF1B	miR-382	FOXN2	0.321203	0.308666	-0.117612	0.715837	0.17328	0.590186
	circLIFR	miR-382	FOXN2	-0.22759	0.476837	-0.117612	0.715837	0.432216	0.160555
	circLIMCH1	miR-382	FOXN2	-0.178713	0.578397	-0.117612	0.715837	0.388042	0.212602
	circTRIP11	miR-382	FOXN2	0.533883	0.0737984	-0.117612	0.715837	0.0284475	0.930068
	circAMOTL1	miR-411	DLG1	-0.226438	0.479131	-0.187492	0.559547	0.212852	0.506564
	circAMOTL1	miR-411	LAMP2	-0.226438	0.479131	-0.102427	0.751426	-0.0472183	0.884143
	circTRIP11	miR-411	DLG1	0.110432	0.732604	-0.187492	0.559547	0.44287	0.149348
	circTRIP11	miR-411	LAMP2	0.110432	0.732604	-0.102427	0.751426	0.18999	0.554231
	circAGL	miR-421-3p	CALCRL	-0.448059	0.144077	-0.468484	0.124498	-0.0282849	0.930467
	circAGL	miR-421-3p	FOXN2	-0.448059	0.144077	-0.389031	0.211338	0.0858402	0.790814
	circAGL	miR-421-3p	MEF2D	-0.448059	0.144077	0.646628	0.0230669	-0.654609	0.0208941
	circAGL	miR-421-3p	MSTN	-0.448059	0.144077	0.050946	0.875058	0.278167	0.381332
	circAGL	miR-421-3p	MYOD1	-0.448059	0.144077	0.569253	0.0533796	-0.40129	0.196041
	circAGL	miR-421-3p	RB1	-0.448059	0.144077	-0.383812	0.218064	0.0219305	0.946065
	circAGL	miR-421-3p	MTM1	-0.448059	0.144077	-0.486338	0.108884	0.0349901	0.914032
	circAGL	miR-421-3p	PLAGL1	-0.448059	0.144077	-0.0457731	0.887669	-0.355969	0.256102
	circAGL_2	miR-421-3p	CALCRL	-0.446046	0.146107	-0.468484	0.124498	0.0646886	0.84169
	circAGL_2	miR-421-3p	FOXN2	-0.446046	0.146107	-0.389031	0.211338	0.0908816	0.778791
	circAGL_2	miR-421-3p	MEF2D	-0.446046	0.146107	0.646628	0.0230669	-0.646773	0.0230259
	circAGL_2	miR-421-3p	MSTN	-0.446046	0.146107	0.050946	0.875058	0.252282	0.428909
	circAGL_2	miR-421-3p	MYOD1	-0.446046	0.146107	0.569253	0.0533796	-0.390874	0.208993
	circAGL_2	miR-421-3p	RB1	-0.446046	0.146107	-0.383812	0.218064	-0.0544465	0.866539
	circAGL_2	miR-421-3p	MTM1	-0.446046	0.146107	-0.486338	0.108884	0.0908426	0.778884
	circAGL_2	miR-421-3p	PLAGL1	-0.446046	0.146107	-0.0457731	0.887669	-0.279126	0.379625
	circGPAT3	miR-424-3p	ATF3	0.356835	0.254864	0.184881	0.565128	-0.409197	0.186546
	circGPAT3	miR-424-3p	COPS2	0.356835	0.254864	-0.401554	0.195719	0.114203	0.723784
	circGPAT3	miR-424-3p	ENG	0.356835	0.254864	0.761497	0.00400695	0.410284	0.185263
	circGPAT3	miR-424-3p	FOXN2	0.356835	0.254864	-0.419664	0.174425	0.313941	0.320348
	circGPAT3	miR-424-3p	LAMP2	0.356835	0.254864	-0.164348	0.609766	0.187332	0.559889
	circGPAT3	miR-424-3p	MAFF	0.356835	0.254864	0.315023	0.318592	0.513066	0.0880321
	circGPAT3	miR-424-3p	MYOD1	0.356835	0.254864	0.392838	0.206512	0.478771	0.115333
	circLIFR	miR-424-5p	ATF3	-0.362426	0.246957	0.184881	0.565128	0.454632	0.137574
	circLIFR	miR-424-5p	COPS2	-0.362426	0.246957	-0.401554	0.195719	0.443973	0.148218
	circLIFR	miR-424-5p	ENG	-0.362426	0.246957	0.761497	0.00400695	-0.526126	0.0789027
	circLIFR	miR-424-5p	FOXN2	-0.362426	0.246957	-0.419664	0.174425	0.432216	0.160555
	circLIFR	miR-424-5p	LAMP2	-0.362426	0.246957	-0.164348	0.609766	0.513289	0.0878704
	circLIFR	miR-424-5p	MAFF	-0.362426	0.246957	0.315023	0.318592	-0.422925	0.170751
	circLIFR	miR-424-5p	MYOD1	-0.362426	0.246957	0.392838	0.206512	-0.233317	0.465507
	circPHKB	miR-424-5p	ATF3	0.0329444	0.919043	0.184881	0.565128	0.221751	0.488518
	circPHKB	miR-424-5p	COPS2	0.0329444	0.919043	-0.401554	0.195719	0.427313	0.165886
	circPHKB	miR-424-5p	ENG	0.0329444	0.919043	0.761497	0.00400695	-0.183856	0.567323
	circPHKB	miR-424-5p	FOXN2	0.0329444	0.919043	-0.419664	0.174425	0.392905	0.206428
	circPHKB	miR-424-5p	LAMP2	0.0329444	0.919043	-0.164348	0.609766	0.559555	0.0585266
	circPHKB	miR-424-5p	MAFF	0.0329444	0.919043	0.315023	0.318592	-0.42124	0.172643
	circPHKB	miR-424-5p	MYOD1	0.0329444	0.919043	0.392838	0.206512	0.19905	0.535122
	circTRIP11	miR-424-5p	ATF3	0.0926915	0.774485	0.184881	0.565128	0.116325	0.718834
	circTRIP11	miR-424-5p	COPS2	0.0926915	0.774485	-0.401554	0.195719	0.175081	0.586267
	circTRIP11	miR-424-5p	ENG	0.0926915	0.774485	0.761497	0.00400695	-0.24903	0.435081
	circTRIP11	miR-424-5p	FOXN2	0.0926915	0.774485	-0.419664	0.174425	0.0284475	0.930068
	circTRIP11	miR-424-5p	LAMP2	0.0926915	0.774485	-0.164348	0.609766	0.18999	0.554231
	circTRIP11	miR-424-5p	MAFF	0.0926915	0.774485	0.315023	0.318592	-0.441857	0.150392
	circTRIP11	miR-424-5p	MYOD1	0.0926915	0.774485	0.392838	0.206512	-0.110232	0.733072
	circGPAT3	miR-432-5p	COPS2	0.295335	0.35136	-0.398544	0.199406	0.114203	0.723784
	circKANSL1L_3	miR-432-5p	COPS2	0.0411791	0.898889	-0.398544	0.199406	0.377846	0.225909
	circKANSL1L_2	miR-432-5p	COPS2	-0.0361518	0.911188	-0.398544	0.199406	0.302301	0.339567
	circKANSL1L	miR-432-5p	COPS2	-0.0219944	0.945908	-0.398544	0.199406	0.240711	0.451068
	circTRIP11	miR-432-5p	COPS2	0.0830195	0.79756	-0.398544	0.199406	0.175081	0.586267
	circGPAT3	miR-432-5p	MEF2D	0.295335	0.35136	0.726855	0.00740576	0.460273	0.132146
	circKANSL1L_3	miR-432-5p	MEF2D	0.0411791	0.898889	0.726855	0.00740576	-0.476442	0.117368
	circKANSL1L_2	miR-432-5p	MEF2D	-0.0361518	0.911188	0.726855	0.00740576	-0.614941	0.033333
	circKANSL1L	miR-432-5p	MEF2D	-0.0219944	0.945908	0.726855	0.00740576	-0.580062	0.0480263
	circTRIP11	miR-432-5p	MEF2D	0.0830195	0.79756	0.726855	0.00740576	-0.487753	0.107705
	circGPAT3	miR-432-5p	MYOD1	0.295335	0.35136	0.509764	0.0904483	0.478771	0.115333
	circKANSL1L_3	miR-432-5p	MYOD1	0.0411791	0.898889	0.509764	0.0904483	0.0793292	0.806405
	circKANSL1L_2	miR-432-5p	MYOD1	-0.0361518	0.911188	0.509764	0.0904483	-0.0601518	0.852682
	circKANSL1L	miR-432-5p	MYOD1	-0.0219944	0.945908	0.509764	0.0904483	-0.0282572	0.930535
	circTRIP11	miR-432-5p	MYOD1	0.0830195	0.79756	0.509764	0.0904483	-0.110232	0.733072
	circDCUN1D1	miR-450b-5p	CFL2	0.471699	0.121585	-0.157003	0.626045	0.294156	0.353377
	circDCUN1D1	miR-450b-5p	COPS2	0.471699	0.121585	-0.0202576	0.950175	0.428908	0.16414
	circDCUN1D1	miR-450b-5p	ENG	0.471699	0.121585	0.393801	0.205302	-0.179948	0.57573
	circDCUN1D1	miR-450b-5p	ITGA8	0.471699	0.121585	0.142301	0.65909	0.597582	0.0401701
	circDCUN1D1	miR-450b-5p	MSTN	0.471699	0.121585	0.382392	0.219916	0.847355	0.000502165
	circDCUN1D1	miR-450b-5p	RB1	0.471699	0.121585	-0.116099	0.71936	0.280151	0.377804
	circSDAD1	miR-450b-5p	CFL2	0.490318	0.10559	-0.157003	0.626045	0.337156	0.283852
	circSDAD1	miR-450b-5p	COPS2	0.490318	0.10559	-0.0202576	0.950175	0.530252	0.0761591
	circSDAD1	miR-450b-5p	ENG	0.490318	0.10559	0.393801	0.205302	-0.186694	0.561251
	circSDAD1	miR-450b-5p	ITGA8	0.490318	0.10559	0.142301	0.65909	0.76641	0.00364351
	circSDAD1	miR-450b-5p	MSTN	0.490318	0.10559	0.382392	0.219916	0.810679	0.00138055
	circSDAD1	miR-450b-5p	RB1	0.490318	0.10559	-0.116099	0.71936	0.298604	0.345799
	circTRIP11	miR-450b-5p	CFL2	0.568951	0.0535352	-0.157003	0.626045	0.0974044	0.7633
	circTRIP11	miR-450b-5p	COPS2	0.568951	0.0535352	-0.0202576	0.950175	0.175081	0.586267
	circTRIP11	miR-450b-5p	ENG	0.568951	0.0535352	0.393801	0.205302	-0.24903	0.435081
	circTRIP11	miR-450b-5p	ITGA8	0.568951	0.0535352	0.142301	0.65909	0.267611	0.400394
	circTRIP11	miR-450b-5p	MSTN	0.568951	0.0535352	0.382392	0.219916	0.705061	0.0104379
	circTRIP11	miR-450b-5p	RB1	0.568951	0.0535352	-0.116099	0.71936	0.111719	0.72959
	circAGL	miR-451	ITGA8	-0.189748	0.554746	0.261233	0.412141	0.0976838	0.762639
	circZMYM4	miR-451	ITGA8	-0.360784	0.249264	0.261233	0.412141	0.43494	0.15764
	circLIMCH1	miR-455-5p	ITGA8	-0.392602	0.206809	-0.0969044	0.764485	0.290337	0.359953
	circLIMCH1	miR-455-5p	MEF2D	-0.392602	0.206809	0.462089	0.130429	-0.696126	0.0119162
	circLIMCH1	miR-455-5p	MSTN	-0.392602	0.206809	0.103211	0.749576	0.534419	0.0734541
	circENPEP	miR-487b	MEF2D	0.230286	0.471487	0.414382	0.180478	0.487233	0.108137
	circKANSL1L_3	miR-487b	MEF2D	0.326034	0.301028	0.414382	0.180478	-0.476442	0.117368
	circKANSL1L_2	miR-487b	MEF2D	0.294515	0.352761	0.414382	0.180478	-0.614941	0.033333
	circKANSL1L	miR-487b	MEF2D	0.333539	0.289376	0.414382	0.180478	-0.580062	0.0480263
	circLIMCH1	miR-487b	MEF2D	-0.248646	0.435814	0.414382	0.180478	-0.696126	0.0119162
	circLIMCH1	miR-493-3p	ENG	-0.348437	0.267014	0.737347	0.00620813	-0.455418	0.136809
	circLIMCH1	miR-493-3p	IGF1	-0.348437	0.267014	-0.0656435	0.83938	0.473802	0.119703
	circLIMCH1	miR-493-3p	MEF2D	-0.348437	0.267014	0.555408	0.0608297	-0.696126	0.0119162
	circLIMCH1	miR-493-3p	CALCRL	-0.348437	0.267014	-0.335035	0.287084	0.244118	0.444487
	circLIMCH1	miR-493-3p	DLG1	-0.348437	0.267014	0.132359	0.681762	0.537742	0.0713454
	circLIMCH1	miR-493-3p	ITGA8	-0.348437	0.267014	0.0456061	0.888077	0.290337	0.359953
	circLIMCH1	miR-493-3p	MTM1	-0.348437	0.267014	-0.122535	0.704404	0.426355	0.166941
	circMYBPC2	miR-493-3p	ENG	0.135851	0.67377	0.737347	0.00620813	-0.175929	0.584426
	circMYBPC2	miR-493-3p	IGF1	0.135851	0.67377	-0.0656435	0.83938	0.571007	0.052484
	circMYBPC2	miR-493-3p	MEF2D	0.135851	0.67377	0.555408	0.0608297	-0.506379	0.092972
	circMYBPC2	miR-493-3p	CALCRL	0.135851	0.67377	-0.335035	0.287084	-0.21987	0.492307
	circMYBPC2	miR-493-3p	DLG1	0.135851	0.67377	0.132359	0.681762	0.373103	0.232265
	circMYBPC2	miR-493-3p	ITGA8	0.135851	0.67377	0.0456061	0.888077	0.288702	0.362788
	circMYBPC2	miR-493-3p	MTM1	0.135851	0.67377	-0.122535	0.704404	-0.00769793	0.981057
	circAGO4	miR-493-5p	ENG	-0.230886	0.470301	0.737347	0.00620813	0.124711	0.699369
	circAGO4	miR-493-5p	IGF1	-0.230886	0.470301	-0.0656435	0.83938	-0.286012	0.367477
	circAGO4	miR-493-5p	MEF2D	-0.230886	0.470301	0.555408	0.0608297	0.408202	0.187725
	circAGO4	miR-493-5p	CALCRL	-0.230886	0.470301	-0.335035	0.287084	0.419482	0.174631
	circAGO4	miR-493-5p	DLG1	-0.230886	0.470301	0.132359	0.681762	-0.07962	0.805707
	circAGO4	miR-493-5p	ITGA8	-0.230886	0.470301	0.0456061	0.888077	0.0498678	0.877685
	circAGO4	miR-493-5p	MTM1	-0.230886	0.470301	-0.122535	0.704404	0.239229	0.453946
	circATG4C	miR-493-5p	ENG	-0.116984	0.7173	0.737347	0.00620813	-0.415148	0.179592
	circATG4C	miR-493-5p	IGF1	-0.116984	0.7173	-0.0656435	0.83938	0.365305	0.242943
	circATG4C	miR-493-5p	MEF2D	-0.116984	0.7173	0.555408	0.0608297	-0.59976	0.0392623
	circATG4C	miR-493-5p	CALCRL	-0.116984	0.7173	-0.335035	0.287084	0.155617	0.629136
	circATG4C	miR-493-5p	DLG1	-0.116984	0.7173	0.132359	0.681762	0.523146	0.0809263
	circATG4C	miR-493-5p	ITGA8	-0.116984	0.7173	0.0456061	0.888077	0.274762	0.38743
	circATG4C	miR-493-5p	MTM1	-0.116984	0.7173	-0.122535	0.704404	0.323643	0.304795
	circKANSL1L_3	miR-493-5p	ENG	0.438182	0.154216	0.737347	0.00620813	-0.209617	0.513196
	circKANSL1L_3	miR-493-5p	IGF1	0.438182	0.154216	-0.0656435	0.83938	0.314844	0.318881
	circKANSL1L_3	miR-493-5p	MEF2D	0.438182	0.154216	0.555408	0.0608297	-0.476442	0.117368
	circKANSL1L_3	miR-493-5p	CALCRL	0.438182	0.154216	-0.335035	0.287084	0.109006	0.735949
	circKANSL1L_3	miR-493-5p	DLG1	0.438182	0.154216	0.132359	0.681762	0.599054	0.039555
	circKANSL1L_3	miR-493-5p	ITGA8	0.438182	0.154216	0.0456061	0.888077	0.414425	0.180429
	circKANSL1L_3	miR-493-5p	MTM1	0.438182	0.154216	-0.122535	0.704404	0.360478	0.249696
	circKANSL1L_2	miR-493-5p	ENG	0.431865	0.160933	0.737347	0.00620813	-0.297518	0.347641
	circKANSL1L_2	miR-493-5p	IGF1	0.431865	0.160933	-0.0656435	0.83938	0.448344	0.143791
	circKANSL1L_2	miR-493-5p	MEF2D	0.431865	0.160933	0.555408	0.0608297	-0.614941	0.033333
	circKANSL1L_2	miR-493-5p	CALCRL	0.431865	0.160933	-0.335035	0.287084	-0.0066103	0.983733
	circKANSL1L_2	miR-493-5p	DLG1	0.431865	0.160933	0.132359	0.681762	0.597417	0.0402396
	circKANSL1L_2	miR-493-5p	ITGA8	0.431865	0.160933	0.0456061	0.888077	0.379355	0.223909
	circKANSL1L_2	miR-493-5p	MTM1	0.431865	0.160933	-0.122535	0.704404	0.26642	0.402576
	circKANSL1L	miR-493-5p	ENG	0.458006	0.13431	0.737347	0.00620813	-0.305955	0.333468
	circKANSL1L	miR-493-5p	IGF1	0.458006	0.13431	-0.0656435	0.83938	0.346275	0.270196
	circKANSL1L	miR-493-5p	MEF2D	0.458006	0.13431	0.555408	0.0608297	-0.580062	0.0480263
	circKANSL1L	miR-493-5p	CALCRL	0.458006	0.13431	-0.335035	0.287084	-0.0405334	0.900468
	circKANSL1L	miR-493-5p	DLG1	0.458006	0.13431	0.132359	0.681762	0.531205	0.0755346
	circKANSL1L	miR-493-5p	ITGA8	0.458006	0.13431	0.0456061	0.888077	0.289639	0.361162
	circKANSL1L	miR-493-5p	MTM1	0.458006	0.13431	-0.122535	0.704404	0.262229	0.410294
	circAMOTL1	miR-504	LAMP2	-0.257871	0.418399	-0.154461	0.631717	-0.0472183	0.884143
	circAMOTL1	miR-504	MAFF	-0.257871	0.418399	0.376719	0.227409	-0.67332	0.0163896
	circAMOTL1	miR-504	MYOD1	-0.257871	0.418399	0.524744	0.0798371	-0.492717	0.103636
	circLIMCH1	miR-542-3p	COPS2	-0.254292	0.425115	-0.167011	0.603903	0.351515	0.262523
	circLIMCH1	miR-542-3p	ENG	-0.254292	0.425115	0.521809	0.0818453	-0.455418	0.136809
	circLIMCH1	miR-542-3p	PFKM	-0.254292	0.425115	0.0820872	0.799792	0.767921	0.00353688
	circTRIP11	miR-542-3p	COPS2	0.45467	0.137536	-0.167011	0.603903	0.175081	0.586267
	circTRIP11	miR-542-3p	ENG	0.45467	0.137536	0.521809	0.0818453	-0.24903	0.435081
	circTRIP11	miR-542-3p	PFKM	0.45467	0.137536	0.0820872	0.799792	0.691178	0.0127986
	circATG4C	miR-7142-3p	MTM1	0.26936	0.397204	0.141765	0.660305	0.323643	0.304795
	circENPEP	miR-7142-3p	MTM1	0.0285695	0.929769	0.141765	0.660305	-0.0386739	0.905015
	circKANSL1L_3	miR-7142-3p	MTM1	-0.266557	0.402323	0.141765	0.660305	0.360478	0.249696
	circKANSL1L_2	miR-7142-3p	MTM1	-0.210302	0.51179	0.141765	0.660305	0.26642	0.402576
	circKANSL1L	miR-7142-3p	MTM1	-0.193314	0.547187	0.141765	0.660305	0.262229	0.410294
	circSNRK	miR-7142-3p	MTM1	0.462775	0.129784	0.141765	0.660305	0.829029	0.000856879
	circATG4C	miR-7142-3p	MYOD1	0.26936	0.397204	-0.524391	0.0800772	-0.232593	0.466933
	circENPEP	miR-7142-3p	MYOD1	0.0285695	0.929769	-0.524391	0.0800772	0.383835	0.218035
	circKANSL1L_3	miR-7142-3p	MYOD1	-0.266557	0.402323	-0.524391	0.0800772	0.0793292	0.806405
	circKANSL1L_2	miR-7142-3p	MYOD1	-0.210302	0.51179	-0.524391	0.0800772	-0.0601518	0.852682
	circKANSL1L	miR-7142-3p	MYOD1	-0.193314	0.547187	-0.524391	0.0800772	-0.0282572	0.930535
	circSNRK	miR-7142-3p	MYOD1	0.462775	0.129784	-0.524391	0.0800772	-0.0262697	0.935411
	circLIMCH1	miR-758	ANKRD2	-0.226403	0.479202	-0.205165	0.522385	-0.192923	0.548015
	circLIMCH1	miR-758	DLG1	-0.226403	0.479202	-0.106026	0.742947	0.537742	0.0713454
	circLIMCH1	miR-758	MYOD1	-0.226403	0.479202	0.43611	0.156399	-0.191087	0.551902
	circLIMCH1	miR-758	TIPARP	-0.226403	0.479202	-0.152882	0.635249	0.345048	0.272011
	circAGL	miR-885-5p	COPS2	0.127034	0.694007	0.407275	0.188827	0.0908156	0.778948
	circKANSL1L_3	miR-885-5p	COPS2	-0.22336	0.485287	0.407275	0.188827	0.377846	0.225909
	circKANSL1L_2	miR-885-5p	COPS2	-0.353506	0.259641	0.407275	0.188827	0.302301	0.339567
	circKANSL1L	miR-885-5p	COPS2	-0.309434	0.327716	0.407275	0.188827	0.240711	0.451068
	circAGL	miR-885-5p	MSTN	0.127034	0.694007	-0.128329	0.691022	0.278167	0.381332
	circKANSL1L_3	miR-885-5p	MSTN	-0.22336	0.485287	-0.128329	0.691022	0.783678	0.00256096
	circKANSL1L_2	miR-885-5p	MSTN	-0.353506	0.259641	-0.128329	0.691022	0.797442	0.00189002
	circKANSL1L	miR-885-5p	MSTN	-0.309434	0.327716	-0.128329	0.691022	0.781248	0.00269614
	circAGO4	miR-9	FOXN2	-0.191553	0.550914	-0.578548	0.0487525	0.430049	0.162897
	circKANSL1L_3	miR-9	FOXN2	0.159889	0.61963	-0.578548	0.0487525	0.282208	0.374162
	circKANSL1L_2	miR-9	FOXN2	0.151142	0.639148	-0.578548	0.0487525	0.203041	0.526795
	circKANSL1L	miR-9	FOXN2	0.160952	0.617274	-0.578548	0.0487525	0.146376	0.649871
	circTRIP11	miR-9	FOXN2	0.242141	0.448301	-0.578548	0.0487525	0.0284475	0.930068
	circAGO4	miR-9	MSTN	-0.191553	0.550914	0.024986	0.938562	-0.281342	0.375692
	circKANSL1L_3	miR-9	MSTN	0.159889	0.61963	0.024986	0.938562	0.783678	0.00256096
	circKANSL1L_2	miR-9	MSTN	0.151142	0.639148	0.024986	0.938562	0.797442	0.00189002
	circKANSL1L	miR-9	MSTN	0.160952	0.617274	0.024986	0.938562	0.781248	0.00269614
	circTRIP11	miR-9	MSTN	0.242141	0.448301	0.024986	0.938562	0.705061	0.0104379
	circAGO4	miR-9-1	FOXN2	-0.191553	0.550914	-0.578548	0.0487525	0.430049	0.162897
	circKANSL1L_3	miR-9-1	FOXN2	0.159889	0.61963	-0.578548	0.0487525	0.282208	0.374162
	circKANSL1L_2	miR-9-1	FOXN2	0.151142	0.639148	-0.578548	0.0487525	0.203041	0.526795
	circKANSL1L	miR-9-1	FOXN2	0.160952	0.617274	-0.578548	0.0487525	0.146376	0.649871
	circTRIP11	miR-9-1	FOXN2	0.242141	0.448301	-0.578548	0.0487525	0.0284475	0.930068
	circAGO4	miR-9-1	MSTN	-0.191553	0.550914	0.024986	0.938562	-0.281342	0.375692
	circKANSL1L_3	miR-9-1	MSTN	0.159889	0.61963	0.024986	0.938562	0.783678	0.00256096
	circKANSL1L_2	miR-9-1	MSTN	0.151142	0.639148	0.024986	0.938562	0.797442	0.00189002
	circKANSL1L	miR-9-1	MSTN	0.160952	0.617274	0.024986	0.938562	0.781248	0.00269614
	circTRIP11	miR-9-1	MSTN	0.242141	0.448301	0.024986	0.938562	0.705061	0.0104379
	circAGO4	miR-9-2	FOXN2	-0.191553	0.550914	-0.578548	0.0487525	0.430049	0.162897
	circKANSL1L_3	miR-9-2	FOXN2	0.159889	0.61963	-0.578548	0.0487525	0.282208	0.374162
	circKANSL1L_2	miR-9-2	FOXN2	0.151142	0.639148	-0.578548	0.0487525	0.203041	0.526795
	circKANSL1L	miR-9-2	FOXN2	0.160952	0.617274	-0.578548	0.0487525	0.146376	0.649871
	circTRIP11	miR-9-2	FOXN2	0.242141	0.448301	-0.578548	0.0487525	0.0284475	0.930068
	circAGO4	miR-9-2	MSTN	-0.191553	0.550914	0.024986	0.938562	-0.281342	0.375692
	circKANSL1L_3	miR-9-2	MSTN	0.159889	0.61963	0.024986	0.938562	0.783678	0.00256096
	circKANSL1L_2	miR-9-2	MSTN	0.151142	0.639148	0.024986	0.938562	0.797442	0.00189002
	circKANSL1L	miR-9-2	MSTN	0.160952	0.617274	0.024986	0.938562	0.781248	0.00269614
	circTRIP11	miR-9-2	MSTN	0.242141	0.448301	0.024986	0.938562	0.705061	0.0104379

## Sheet: I
CircRNA→miRNA→mRNA networks identified by competing to bind with shared miRNAs between LW1D and LW90D samples
circRNA	miRNA	gene	circRNA-miRNA		miRNA-gene		circRNA-gene
			R	P	R	P	R	P
circANKRD2	miR-1	IFRD1	-0.141187	0.661619	-0.109789	0.734111	0.33658	0.284727
circANKRD2	miR-1	LMOD2	-0.141187	0.661619	0.396727	0.201653	0.489187	0.106519
circANKRD2	miR-1	TPM3	-0.141187	0.661619	0.194613	0.544446	0.489406	0.106338
circNCBP3	miR-1	IFRD1	0.369587	0.237043	-0.109789	0.734111	0.460403	0.132023
circNCBP3	miR-1	LMOD2	0.369587	0.237043	0.396727	0.201653	0.836174	0.000701052
circNCBP3	miR-1	TPM3	0.369587	0.237043	0.194613	0.544446	0.725004	0.00763387
circTBC1D22A	miR-1	IFRD1	0.283643	0.371633	-0.109789	0.734111	0.662658	0.0188581
circTBC1D22A	miR-1	LMOD2	0.283643	0.371633	0.396727	0.201653	0.885772	0.000126062
circTBC1D22A	miR-1	TPM3	0.283643	0.371633	0.194613	0.544446	0.716841	0.0087029
circ4082	miR-122	FKBP1A	0.590747	0.0431172	0.0018566	0.995431	0.424551	0.168938
circ4082	miR-122	MEF2D	0.590747	0.0431172	-0.525969	0.079009	-0.186679	0.561283
circ4082	miR-122	TMOD1	0.590747	0.0431172	-0.206896	0.518805	0.340803	0.278345
circZNF292	miR-122	FKBP1A	0.203859	0.525096	0.0018566	0.995431	0.505307	0.0937803
circZNF292	miR-122	MEF2D	0.203859	0.525096	-0.525969	0.079009	0.165602	0.607002
circZNF292	miR-122	TMOD1	0.203859	0.525096	-0.206896	0.518805	0.429273	0.163742
circ0470	miR-125b	ACTN2	0.0734037	0.82065	-0.00712876	0.982458	0.672539	0.0165618
circ0470	miR-125b	CLCN1	0.0734037	0.82065	0.388424	0.212113	0.235721	0.46079
circ0470	miR-125b	FBXO40	0.0734037	0.82065	-0.319312	0.311685	0.368591	0.238409
circ0470	miR-125b	FKBP1A	0.0734037	0.82065	-0.0464392	0.886044	0.563933	0.056162
circ0470	miR-125b	LEMD2	0.0734037	0.82065	-0.189284	0.555731	0.620848	0.0312097
circ0470	miR-125b	LMOD2	0.0734037	0.82065	-0.16826	0.601161	0.623358	0.0303374
circEZH1	miR-125b	ACTN2	0.663867	0.0185654	-0.00712876	0.982458	0.591392	0.0428328
circEZH1	miR-125b	CLCN1	0.663867	0.0185654	0.388424	0.212113	0.529938	0.0763651
circEZH1	miR-125b	FBXO40	0.663867	0.0185654	-0.319312	0.311685	-0.135896	0.673667
circEZH1	miR-125b	FKBP1A	0.663867	0.0185654	-0.0464392	0.886044	0.24863	0.435844
circEZH1	miR-125b	LEMD2	0.663867	0.0185654	-0.189284	0.555731	0.353535	0.2596
circEZH1	miR-125b	LMOD2	0.663867	0.0185654	-0.16826	0.601161	0.392966	0.206351
circ4082	miR-126-5p	FKBP1A	0.233652	0.464848	0.402602	0.194445	0.424551	0.168938
circ4082	miR-126-5p	MEF2D	0.233652	0.464848	0.299272	0.344669	-0.186679	0.561283
circ4082	miR-126-5p	PLAGL1	0.233652	0.464848	0.60078	0.0388417	0.727357	0.00734482
circ4082	miR-126-5p	SCN7A	0.233652	0.464848	0.306645	0.332323	0.950779	2.09426e-06
circATF7IP	miR-126-5p	FKBP1A	-0.304401	0.336055	0.402602	0.194445	-0.0494068	0.878808
circATF7IP	miR-126-5p	MEF2D	-0.304401	0.336055	0.299272	0.344669	-0.0477941	0.882739
circATF7IP	miR-126-5p	PLAGL1	-0.304401	0.336055	0.60078	0.0388417	-0.470278	0.122867
circATF7IP	miR-126-5p	SCN7A	-0.304401	0.336055	0.306645	0.332323	-0.522987	0.0810353
circ4082	miR-1285	CLCN1	0.234393	0.463393	0.0701889	0.828399	0.147001	0.648462
circ4082	miR-1285	MEF2D	0.234393	0.463393	-0.187062	0.560465	-0.186679	0.561283
circNR1H3	miR-1285	CLCN1	0.0944512	0.770304	0.0701889	0.828399	0.60463	0.0372844
circNR1H3	miR-1285	MEF2D	0.0944512	0.770304	-0.187062	0.560465	0.302301	0.339567
circ0470	miR-129a-5p	ACTN2	-0.43211	0.160669	-0.390861	0.20901	0.672539	0.0165618
circ0470	miR-129a-5p	ANKRD1	-0.43211	0.160669	-0.308836	0.328702	0.28428	0.370513
circ0470	miR-129a-5p	COPS2	-0.43211	0.160669	-0.382882	0.219276	0.801705	0.00171242
circ0470	miR-129a-5p	FBXO40	-0.43211	0.160669	0.0163198	0.959852	0.368591	0.238409
circ0470	miR-129a-5p	FKBP1A	-0.43211	0.160669	-0.322123	0.307203	0.563933	0.056162
circ0470	miR-129a-5p	FOXN2	-0.43211	0.160669	-0.365837	0.242205	0.769915	0.00339987
circ0470	miR-129a-5p	RB1	-0.43211	0.160669	-0.402952	0.19402	0.753368	0.00466785
circ0470	miR-129a-5p	TMOD1	-0.43211	0.160669	-0.451995	0.140159	0.546537	0.0659651
circKIAA2026	miR-129a-5p	ACTN2	-0.680364	0.0148946	-0.390861	0.20901	0.674155	0.0162069
circKIAA2026	miR-129a-5p	ANKRD1	-0.680364	0.0148946	-0.308836	0.328702	0.690613	0.0129023
circKIAA2026	miR-129a-5p	COPS2	-0.680364	0.0148946	-0.382882	0.219276	0.689733	0.0130653
circKIAA2026	miR-129a-5p	FBXO40	-0.680364	0.0148946	0.0163198	0.959852	-0.0447246	0.890229
circKIAA2026	miR-129a-5p	FKBP1A	-0.680364	0.0148946	-0.322123	0.307203	0.547693	0.0652799
circKIAA2026	miR-129a-5p	FOXN2	-0.680364	0.0148946	-0.365837	0.242205	0.663061	0.0187602
circKIAA2026	miR-129a-5p	RB1	-0.680364	0.0148946	-0.402952	0.19402	0.70485	0.0104712
circKIAA2026	miR-129a-5p	TMOD1	-0.680364	0.0148946	-0.451995	0.140159	0.588353	0.0441849
circPDCD4	miR-129a-5p	ACTN2	-0.352776	0.260696	-0.390861	0.20901	0.792081	0.00213297
circPDCD4	miR-129a-5p	ANKRD1	-0.352776	0.260696	-0.308836	0.328702	0.548622	0.0647323
circPDCD4	miR-129a-5p	COPS2	-0.352776	0.260696	-0.382882	0.219276	0.665982	0.0180611
circPDCD4	miR-129a-5p	FBXO40	-0.352776	0.260696	0.0163198	0.959852	-0.127356	0.693265
circPDCD4	miR-129a-5p	FKBP1A	-0.352776	0.260696	-0.322123	0.307203	0.259643	0.415094
circPDCD4	miR-129a-5p	FOXN2	-0.352776	0.260696	-0.365837	0.242205	0.627389	0.0289735
circPDCD4	miR-129a-5p	RB1	-0.352776	0.260696	-0.402952	0.19402	0.730348	0.00698937
circPDCD4	miR-129a-5p	TMOD1	-0.352776	0.260696	-0.451995	0.140159	0.190461	0.553229
circPUM2	miR-129a-5p	ACTN2	-0.468749	0.124256	-0.390861	0.20901	0.670343	0.0170533
circPUM2	miR-129a-5p	ANKRD1	-0.468749	0.124256	-0.308836	0.328702	0.460569	0.131866
circPUM2	miR-129a-5p	COPS2	-0.468749	0.124256	-0.382882	0.219276	0.448998	0.143136
circPUM2	miR-129a-5p	FBXO40	-0.468749	0.124256	0.0163198	0.959852	-0.258221	0.417745
circPUM2	miR-129a-5p	FKBP1A	-0.468749	0.124256	-0.322123	0.307203	0.209228	0.513998
circPUM2	miR-129a-5p	FOXN2	-0.468749	0.124256	-0.365837	0.242205	0.492721	0.103633
circPUM2	miR-129a-5p	RB1	-0.468749	0.124256	-0.402952	0.19402	0.49643	0.100661
circPUM2	miR-129a-5p	TMOD1	-0.468749	0.124256	-0.451995	0.140159	0.482081	0.112482
circ0470	miR-129b	ACTN2	-0.433363	0.159324	-0.391136	0.208661	0.672539	0.0165618
circ0470	miR-129b	ANKRD1	-0.433363	0.159324	-0.308802	0.328757	0.28428	0.370513
circ0470	miR-129b	COPS2	-0.433363	0.159324	-0.383928	0.217913	0.801705	0.00171242
circ0470	miR-129b	FBXO40	-0.433363	0.159324	0.0157511	0.96125	0.368591	0.238409
circ0470	miR-129b	FKBP1A	-0.433363	0.159324	-0.323287	0.305359	0.563933	0.056162
circ0470	miR-129b	FOXN2	-0.433363	0.159324	-0.366596	0.241155	0.769915	0.00339987
circ0470	miR-129b	RB1	-0.433363	0.159324	-0.403471	0.193393	0.753368	0.00466785
circ0470	miR-129b	TMOD1	-0.433363	0.159324	-0.452948	0.139222	0.546537	0.0659651
circKIAA2026	miR-129b	ACTN2	-0.680834	0.0147986	-0.391136	0.208661	0.674155	0.0162069
circKIAA2026	miR-129b	ANKRD1	-0.680834	0.0147986	-0.308802	0.328757	0.690613	0.0129023
circKIAA2026	miR-129b	COPS2	-0.680834	0.0147986	-0.383928	0.217913	0.689733	0.0130653
circKIAA2026	miR-129b	FBXO40	-0.680834	0.0147986	0.0157511	0.96125	-0.0447246	0.890229
circKIAA2026	miR-129b	FKBP1A	-0.680834	0.0147986	-0.323287	0.305359	0.547693	0.0652799
circKIAA2026	miR-129b	FOXN2	-0.680834	0.0147986	-0.366596	0.241155	0.663061	0.0187602
circKIAA2026	miR-129b	RB1	-0.680834	0.0147986	-0.403471	0.193393	0.70485	0.0104712
circKIAA2026	miR-129b	TMOD1	-0.680834	0.0147986	-0.452948	0.139222	0.588353	0.0441849
circPDCD4	miR-129b	ACTN2	-0.353123	0.260194	-0.391136	0.208661	0.792081	0.00213297
circPDCD4	miR-129b	ANKRD1	-0.353123	0.260194	-0.308802	0.328757	0.548622	0.0647323
circPDCD4	miR-129b	COPS2	-0.353123	0.260194	-0.383928	0.217913	0.665982	0.0180611
circPDCD4	miR-129b	FBXO40	-0.353123	0.260194	0.0157511	0.96125	-0.127356	0.693265
circPDCD4	miR-129b	FKBP1A	-0.353123	0.260194	-0.323287	0.305359	0.259643	0.415094
circPDCD4	miR-129b	FOXN2	-0.353123	0.260194	-0.366596	0.241155	0.627389	0.0289735
circPDCD4	miR-129b	RB1	-0.353123	0.260194	-0.403471	0.193393	0.730348	0.00698937
circPDCD4	miR-129b	TMOD1	-0.353123	0.260194	-0.452948	0.139222	0.190461	0.553229
circPUM2	miR-129b	ACTN2	-0.469099	0.123937	-0.391136	0.208661	0.670343	0.0170533
circPUM2	miR-129b	ANKRD1	-0.469099	0.123937	-0.308802	0.328757	0.460569	0.131866
circPUM2	miR-129b	COPS2	-0.469099	0.123937	-0.383928	0.217913	0.448998	0.143136
circPUM2	miR-129b	FBXO40	-0.469099	0.123937	0.0157511	0.96125	-0.258221	0.417745
circPUM2	miR-129b	FKBP1A	-0.469099	0.123937	-0.323287	0.305359	0.209228	0.513998
circPUM2	miR-129b	FOXN2	-0.469099	0.123937	-0.366596	0.241155	0.492721	0.103633
circPUM2	miR-129b	RB1	-0.469099	0.123937	-0.403471	0.193393	0.49643	0.100661
circPUM2	miR-129b	TMOD1	-0.469099	0.123937	-0.452948	0.139222	0.482081	0.112482
circCHD7	miR-1306-5p	LEMD2	0.484726	0.110237	0.277848	0.381902	0.888798	0.000110809
circCHD7	miR-1306-5p	MAFF	0.484726	0.110237	0.0816843	0.800758	0.380251	0.222727
circCHD7	miR-1306-5p	MEF2D	0.484726	0.110237	-0.224403	0.483197	-0.145247	0.652422
circGRIPAP1	miR-1306-5p	LEMD2	0.210853	0.510657	0.277848	0.381902	0.911845	3.61062e-05
circGRIPAP1	miR-1306-5p	MAFF	0.210853	0.510657	0.0816843	0.800758	0.400455	0.197061
circGRIPAP1	miR-1306-5p	MEF2D	0.210853	0.510657	-0.224403	0.483197	-0.264783	0.405582
circMYBPC2_3	miR-1306-5p	LEMD2	0.652781	0.0213779	0.277848	0.381902	-0.282972	0.372815
circMYBPC2_3	miR-1306-5p	MAFF	0.652781	0.0213779	0.0816843	0.800758	-0.55519	0.0609525
circMYBPC2_3	miR-1306-5p	MEF2D	0.652781	0.0213779	-0.224403	0.483197	-0.543213	0.0679644
circ4082	miR-130a	ATF3	-0.482855	0.111822	-0.0741762	0.818789	-0.411667	0.18364
circ4082	miR-130a	FBXO40	-0.482855	0.111822	-0.364656	0.243845	0.156229	0.627771
circ4082	miR-130a	IFRD1	-0.482855	0.111822	0.159706	0.620036	0.449355	0.14278
circ4082	miR-130a	SCN7A	-0.482855	0.111822	-0.348573	0.266816	0.950779	2.09426e-06
circKANSL1L_4	miR-130a	ATF3	-0.196953	0.539521	-0.0741762	0.818789	-0.0943291	0.770594
circKANSL1L_4	miR-130a	FBXO40	-0.196953	0.539521	-0.364656	0.243845	0.430623	0.162274
circKANSL1L_4	miR-130a	IFRD1	-0.196953	0.539521	0.159706	0.620036	0.778629	0.0028479
circKANSL1L_4	miR-130a	SCN7A	-0.196953	0.539521	-0.348573	0.266816	0.755867	0.00445651
circPFKFB1	miR-133a-5p	FOXN2	-0.181595	0.572181	-0.30558	0.334092	-0.0955563	0.767682
circPFKFB1	miR-133a-5p	IFRD1	-0.181595	0.572181	-0.148762	0.644496	-0.192548	0.548808
circPFKFB1	miR-133a-5p	SCN7A	-0.181595	0.572181	0.0373678	0.908211	-0.42102	0.172891
circ3514	miR-1343	ANKRD2	0.0232149	0.942911	0.0890496	0.783155	0.71185	0.00940939
circ3514	miR-1343	CLCN1	0.0232149	0.942911	0.532272	0.0748394	0.363851	0.244965
circ3514	miR-1343	MAFF	0.0232149	0.942911	0.406696	0.189518	0.56247	0.0569449
circ3514	miR-1343	TPM4	0.0232149	0.942911	-0.167298	0.603272	0.462827	0.129735
circANKRD2	miR-1343	ANKRD2	0.463208	0.129378	0.0890496	0.783155	0.662402	0.0189205
circANKRD2	miR-1343	CLCN1	0.463208	0.129378	0.532272	0.0748394	0.541749	0.0688584
circANKRD2	miR-1343	MAFF	0.463208	0.129378	0.406696	0.189518	0.5977	0.0401206
circANKRD2	miR-1343	TPM4	0.463208	0.129378	-0.167298	0.603272	0.33397	0.288715
circGRIPAP1	miR-1343	ANKRD2	-0.142162	0.659406	0.0890496	0.783155	0.60305	0.0379178
circGRIPAP1	miR-1343	CLCN1	-0.142162	0.659406	0.532272	0.0748394	0.48629	0.108924
circGRIPAP1	miR-1343	MAFF	-0.142162	0.659406	0.406696	0.189518	0.400455	0.197061
circGRIPAP1	miR-1343	TPM4	-0.142162	0.659406	-0.167298	0.603272	0.788433	0.00231146
circZNF292	miR-1343	ANKRD2	-0.141048	0.661933	0.0890496	0.783155	0.758523	0.00423991
circZNF292	miR-1343	CLCN1	-0.141048	0.661933	0.532272	0.0748394	0.389832	0.210317
circZNF292	miR-1343	MAFF	-0.141048	0.661933	0.406696	0.189518	0.602453	0.0381593
circZNF292	miR-1343	TPM4	-0.141048	0.661933	-0.167298	0.603272	0.611267	0.0347047
circ4082	miR-136	COPS2	-0.571303	0.0523337	-0.161487	0.616088	0.680062	0.0149567
circKIAA2026	miR-136	COPS2	0.200089	0.532949	-0.161487	0.616088	0.689733	0.0130653
circSAV1	miR-136	COPS2	0.0226331	0.944339	-0.161487	0.616088	0.598572	0.0397556
circTRMT11	miR-136	COPS2	-0.113874	0.724553	-0.161487	0.616088	0.59876	0.0396772
circUSP33	miR-136	COPS2	-0.220876	0.490279	-0.161487	0.616088	0.841112	0.00060686
circPLCE1	miR-136	COPS2	-0.211999	0.50831	-0.161487	0.616088	0.310803	0.325469
circ4082	miR-136	FBXO40	-0.571303	0.0523337	-0.137673	0.669613	0.156229	0.627771
circKIAA2026	miR-136	FBXO40	0.200089	0.532949	-0.137673	0.669613	-0.0447246	0.890229
circSAV1	miR-136	FBXO40	0.0226331	0.944339	-0.137673	0.669613	-0.244659	0.443447
circTRMT11	miR-136	FBXO40	-0.113874	0.724553	-0.137673	0.669613	0.363734	0.245129
circUSP33	miR-136	FBXO40	-0.220876	0.490279	-0.137673	0.669613	0.215435	0.501295
circPLCE1	miR-136	FBXO40	-0.211999	0.50831	-0.137673	0.669613	-0.180536	0.574462
circ4082	miR-136	FKBP1A	-0.571303	0.0523337	0.175598	0.585144	0.424551	0.168938
circKIAA2026	miR-136	FKBP1A	0.200089	0.532949	0.175598	0.585144	0.547693	0.0652799
circSAV1	miR-136	FKBP1A	0.0226331	0.944339	0.175598	0.585144	0.423166	0.170481
circTRMT11	miR-136	FKBP1A	-0.113874	0.724553	0.175598	0.585144	0.633823	0.0268892
circUSP33	miR-136	FKBP1A	-0.220876	0.490279	0.175598	0.585144	0.392379	0.20709
circPLCE1	miR-136	FKBP1A	-0.211999	0.50831	0.175598	0.585144	0.0698392	0.829243
circKANSL1L_4	miR-139-5p	ACTN2	0.400899	0.196518	0.460064	0.132345	0.814454	0.00125678
circKANSL1L_5	miR-139-5p	ACTN2	-0.385726	0.215582	0.460064	0.132345	-0.597997	0.039996
circPDCD4	miR-139-5p	ACTN2	0.316617	0.316015	0.460064	0.132345	0.792081	0.00213297
circKANSL1L_5	miR-142-3p	FKBP1A	0.498864	0.0987419	-0.201726	0.529533	-0.154549	0.631521
circKANSL1L_5	miR-142-3p	TPM4	0.498864	0.0987419	-0.204186	0.524417	-0.169439	0.598575
circTRMT11	miR-142-5p	CHRNB1	0.131782	0.683085	-0.119244	0.71204	0.613419	0.0338964
circTRMT11	miR-142-5p	COPS2	0.131782	0.683085	-0.00808617	0.980102	0.59876	0.0396772
circTRMT11	miR-142-5p	PLAGL1	0.131782	0.683085	0.100309	0.756427	0.417927	0.176401
circTRMT11	miR-142-5p	SCN7A	0.131782	0.683085	0.231852	0.468394	0.780262	0.0027525
circTRMT11	miR-142-5p	TMOD1	0.131782	0.683085	-0.12275	0.703906	0.537255	0.071652
circPUM2	miR-143-5p	CHRNB1	0.269652	0.396673	-0.119244	0.71204	0.630333	0.028006
circPUM2	miR-143-5p	COPS2	0.269652	0.396673	-0.00808617	0.980102	0.448998	0.143136
circPUM2	miR-143-5p	PLAGL1	0.269652	0.396673	0.100309	0.756427	0.6633	0.0187023
circPUM2	miR-143-5p	SCN7A	0.269652	0.396673	0.231852	0.468394	0.615137	0.0332609
circPUM2	miR-143-5p	TMOD1	0.269652	0.396673	-0.12275	0.703906	0.482081	0.112482
circKIAA2026	miR-145-5p	CHRNB1	0.583867	0.0462353	-0.119244	0.71204	0.854639	0.00039835
circKIAA2026	miR-145-5p	COPS2	0.583867	0.0462353	-0.00808617	0.980102	0.689733	0.0130653
circKIAA2026	miR-145-5p	PLAGL1	0.583867	0.0462353	0.100309	0.756427	0.623336	0.0303448
circKIAA2026	miR-145-5p	SCN7A	0.583867	0.0462353	0.231852	0.468394	0.534213	0.0735867
circKIAA2026	miR-145-5p	TMOD1	0.583867	0.0462353	-0.12275	0.703906	0.588353	0.0441849
circPFKFB1	miR-145-5p	CHRNB1	0.169672	0.598067	-0.119244	0.71204	-0.522822	0.0811485
circPFKFB1	miR-145-5p	COPS2	0.169672	0.598067	-0.00808617	0.980102	0.00532694	0.986891
circPFKFB1	miR-145-5p	PLAGL1	0.169672	0.598067	0.100309	0.756427	-0.610415	0.0350284
circPFKFB1	miR-145-5p	SCN7A	0.169672	0.598067	0.231852	0.468394	-0.42102	0.172891
circPFKFB1	miR-145-5p	TMOD1	0.169672	0.598067	-0.12275	0.703906	-0.0913127	0.777765
circTRMT11	miR-146a-5p	COPS2	-0.234578	0.46303	0.073301	0.820897	0.59876	0.0396772
circTRMT11	miR-146a-5p	FBXO40	-0.234578	0.46303	-0.0175737	0.95677	0.363734	0.245129
circTRMT11	miR-146a-5p	FKBP1A	-0.234578	0.46303	-0.124478	0.699909	0.633823	0.0268892
circTRMT11	miR-146a-5p	FOXN2	-0.234578	0.46303	-0.0196544	0.951657	0.611612	0.034574
circTRMT11	miR-146a-5p	MAFF	-0.234578	0.46303	-0.0594232	0.85445	0.160835	0.617532
circTRMT11	miR-146a-5p	PLAGL1	-0.234578	0.46303	0.316266	0.316582	0.417927	0.176401
circKANSL1L_4	miR-148a-3p	ACTN2	0.0997323	0.757791	-0.33315	0.289974	0.814454	0.00125678
circKANSL1L_4	miR-148a-3p	FKBP1A	0.0997323	0.757791	0.23282	0.466485	0.866963	0.000261395
circKANSL1L_4	miR-148a-3p	SCN7A	0.0997323	0.757791	-0.210639	0.511098	0.755867	0.00445651
circPUM2	miR-148a-3p	ACTN2	-0.100348	0.756335	-0.33315	0.289974	0.670343	0.0170533
circPUM2	miR-148a-3p	FKBP1A	-0.100348	0.756335	0.23282	0.466485	0.209228	0.513998
circPUM2	miR-148a-3p	SCN7A	-0.100348	0.756335	-0.210639	0.511098	0.615137	0.0332609
circ4082	miR-149	CLCN1	-0.176937	0.582239	0.723924	0.0077693	0.147001	0.648462
circ4082	miR-149	FKBP1A	-0.176937	0.582239	0.152328	0.636489	0.424551	0.168938
circ4082	miR-149	SCN7A	-0.176937	0.582239	-0.0335166	0.917641	0.950779	2.09426e-06
circ4082	miR-149	TMOD1	-0.176937	0.582239	0.288724	0.36275	0.340803	0.278345
circEZH1	miR-149	CLCN1	0.711306	0.00948891	0.723924	0.0077693	0.529938	0.0763651
circEZH1	miR-149	FKBP1A	0.711306	0.00948891	0.152328	0.636489	0.24863	0.435844
circEZH1	miR-149	SCN7A	0.711306	0.00948891	-0.0335166	0.917641	0.494583	0.102133
circEZH1	miR-149	TMOD1	0.711306	0.00948891	0.288724	0.36275	0.502193	0.096157
circATF7IP	miR-149	CLCN1	-0.124696	0.699405	0.723924	0.0077693	-0.0616827	0.84897
circATF7IP	miR-149	FKBP1A	-0.124696	0.699405	0.152328	0.636489	-0.0494068	0.878808
circATF7IP	miR-149	SCN7A	-0.124696	0.699405	-0.0335166	0.917641	-0.522987	0.0810353
circATF7IP	miR-149	TMOD1	-0.124696	0.699405	0.288724	0.36275	-0.152026	0.637166
circKANSL1L_4	miR-152	ACTN2	0.0705765	0.827464	-0.23291	0.466308	0.814454	0.00125678
circKANSL1L_4	miR-152	FKBP1A	0.0705765	0.827464	0.104633	0.746226	0.866963	0.000261395
circKANSL1L_4	miR-152	SCN7A	0.0705765	0.827464	-0.279057	0.379749	0.755867	0.00445651
circPUM2	miR-152	ACTN2	0.196874	0.539685	-0.23291	0.466308	0.670343	0.0170533
circPUM2	miR-152	FKBP1A	0.196874	0.539685	0.104633	0.746226	0.209228	0.513998
circPUM2	miR-152	SCN7A	0.196874	0.539685	-0.279057	0.379749	0.615137	0.0332609
circATE1	miR-181a	CLCN1	0.868478	0.000247505	0.678802	0.0152171	0.794576	0.00201711
circATE1	miR-181a	COPS2	0.868478	0.000247505	-0.00906327	0.977698	-0.0791308	0.806881
circATE1	miR-181a	FBXO40	0.868478	0.000247505	-0.413836	0.181111	-0.450368	0.141771
circATE1	miR-181a	FKBP1A	0.868478	0.000247505	0.179646	0.576381	0.23976	0.452913
circATE1	miR-181a	MYF6	0.868478	0.000247505	-0.0357163	0.912254	-0.0499675	0.877442
circNCBP3	miR-181a	CLCN1	0.0573575	0.859464	0.678802	0.0152171	0.168351	0.600962
circNCBP3	miR-181a	COPS2	0.0573575	0.859464	-0.00906327	0.977698	0.722351	0.00796982
circNCBP3	miR-181a	FBXO40	0.0573575	0.859464	-0.413836	0.181111	0.0689191	0.831464
circNCBP3	miR-181a	FKBP1A	0.0573575	0.859464	0.179646	0.576381	0.418243	0.17604
circNCBP3	miR-181a	MYF6	0.0573575	0.859464	-0.0357163	0.912254	0.216918	0.498282
circPUM2	miR-181a	CLCN1	0.537712	0.0713644	0.678802	0.0152171	0.260019	0.414395
circPUM2	miR-181a	COPS2	0.537712	0.0713644	-0.00906327	0.977698	0.448998	0.143136
circPUM2	miR-181a	FBXO40	0.537712	0.0713644	-0.413836	0.181111	-0.258221	0.417745
circPUM2	miR-181a	FKBP1A	0.537712	0.0713644	0.179646	0.576381	0.209228	0.513998
circPUM2	miR-181a	MYF6	0.537712	0.0713644	-0.0357163	0.912254	-0.045752	0.887721
circZNF292	miR-181a	CLCN1	0.350992	0.263283	0.678802	0.0152171	0.389832	0.210317
circZNF292	miR-181a	COPS2	0.350992	0.263283	-0.00906327	0.977698	0.635184	0.0264627
circZNF292	miR-181a	FBXO40	0.350992	0.263283	-0.413836	0.181111	-0.178281	0.579331
circZNF292	miR-181a	FKBP1A	0.350992	0.263283	0.179646	0.576381	0.505307	0.0937803
circZNF292	miR-181a	MYF6	0.350992	0.263283	-0.0357163	0.912254	0.222855	0.4863
circATE1	miR-181b	CLCN1	0.715582	0.00887722	0.697655	0.0116528	0.794576	0.00201711
circATE1	miR-181b	COPS2	0.715582	0.00887722	0.301447	0.341001	-0.0791308	0.806881
circATE1	miR-181b	FBXO40	0.715582	0.00887722	-0.404659	0.19196	-0.450368	0.141771
circATE1	miR-181b	FKBP1A	0.715582	0.00887722	0.296403	0.349537	0.23976	0.452913
circATE1	miR-181b	MYF6	0.715582	0.00887722	0.0780174	0.809554	-0.0499675	0.877442
circNCBP3	miR-181b	CLCN1	0.304857	0.335294	0.697655	0.0116528	0.168351	0.600962
circNCBP3	miR-181b	COPS2	0.304857	0.335294	0.301447	0.341001	0.722351	0.00796982
circNCBP3	miR-181b	FBXO40	0.304857	0.335294	-0.404659	0.19196	0.0689191	0.831464
circNCBP3	miR-181b	FKBP1A	0.304857	0.335294	0.296403	0.349537	0.418243	0.17604
circNCBP3	miR-181b	MYF6	0.304857	0.335294	0.0780174	0.809554	0.216918	0.498282
circPUM2	miR-181b	CLCN1	0.621906	0.0308397	0.697655	0.0116528	0.260019	0.414395
circPUM2	miR-181b	COPS2	0.621906	0.0308397	0.301447	0.341001	0.448998	0.143136
circPUM2	miR-181b	FBXO40	0.621906	0.0308397	-0.404659	0.19196	-0.258221	0.417745
circPUM2	miR-181b	FKBP1A	0.621906	0.0308397	0.296403	0.349537	0.209228	0.513998
circPUM2	miR-181b	MYF6	0.621906	0.0308397	0.0780174	0.809554	-0.045752	0.887721
circZNF292	miR-181b	CLCN1	0.571225	0.0523734	0.697655	0.0116528	0.389832	0.210317
circZNF292	miR-181b	COPS2	0.571225	0.0523734	0.301447	0.341001	0.635184	0.0264627
circZNF292	miR-181b	FBXO40	0.571225	0.0523734	-0.404659	0.19196	-0.178281	0.579331
circZNF292	miR-181b	FKBP1A	0.571225	0.0523734	0.296403	0.349537	0.505307	0.0937803
circZNF292	miR-181b	MYF6	0.571225	0.0523734	0.0780174	0.809554	0.222855	0.4863
circATE1	miR-181d-5p	CLCN1	0.783665	0.00256165	0.725504	0.00757177	0.794576	0.00201711
circATE1	miR-181d-5p	COPS2	0.783665	0.00256165	0.225313	0.481376	-0.0791308	0.806881
circATE1	miR-181d-5p	FBXO40	0.783665	0.00256165	-0.440318	0.151986	-0.450368	0.141771
circATE1	miR-181d-5p	FKBP1A	0.783665	0.00256165	0.290161	0.360257	0.23976	0.452913
circATE1	miR-181d-5p	MYF6	0.783665	0.00256165	0.0613258	0.849835	-0.0499675	0.877442
circNCBP3	miR-181d-5p	CLCN1	0.253537	0.426537	0.725504	0.00757177	0.168351	0.600962
circNCBP3	miR-181d-5p	COPS2	0.253537	0.426537	0.225313	0.481376	0.722351	0.00796982
circNCBP3	miR-181d-5p	FBXO40	0.253537	0.426537	-0.440318	0.151986	0.0689191	0.831464
circNCBP3	miR-181d-5p	FKBP1A	0.253537	0.426537	0.290161	0.360257	0.418243	0.17604
circNCBP3	miR-181d-5p	MYF6	0.253537	0.426537	0.0613258	0.849835	0.216918	0.498282
circPUM2	miR-181d-5p	CLCN1	0.609119	0.0355252	0.725504	0.00757177	0.260019	0.414395
circPUM2	miR-181d-5p	COPS2	0.609119	0.0355252	0.225313	0.481376	0.448998	0.143136
circPUM2	miR-181d-5p	FBXO40	0.609119	0.0355252	-0.440318	0.151986	-0.258221	0.417745
circPUM2	miR-181d-5p	FKBP1A	0.609119	0.0355252	0.290161	0.360257	0.209228	0.513998
circPUM2	miR-181d-5p	MYF6	0.609119	0.0355252	0.0613258	0.849835	-0.045752	0.887721
circZNF292	miR-181d-5p	CLCN1	0.543386	0.0678598	0.725504	0.00757177	0.389832	0.210317
circZNF292	miR-181d-5p	COPS2	0.543386	0.0678598	0.225313	0.481376	0.635184	0.0264627
circZNF292	miR-181d-5p	FBXO40	0.543386	0.0678598	-0.440318	0.151986	-0.178281	0.579331
circZNF292	miR-181d-5p	FKBP1A	0.543386	0.0678598	0.290161	0.360257	0.505307	0.0937803
circZNF292	miR-181d-5p	MYF6	0.543386	0.0678598	0.0613258	0.849835	0.222855	0.4863
circ0470	miR-186	ACTN2	0.209364	0.513717	0.150963	0.63955	0.672539	0.0165618
circ0470	miR-186	COPS2	0.209364	0.513717	-0.0369006	0.909355	0.801705	0.00171242
circ0470	miR-186	FKBP1A	0.209364	0.513717	0.212674	0.506929	0.563933	0.056162
circ0470	miR-186	FOXN2	0.209364	0.513717	-0.103176	0.749659	0.769915	0.00339987
circ0470	miR-186	H3F3A	0.209364	0.513717	0.0378213	0.907101	0.848282	0.000487904
circ0470	miR-186	IFRD1	0.209364	0.513717	0.195352	0.542888	0.533558	0.0740075
circ0470	miR-186	PLAGL1	0.209364	0.513717	0.00972227	0.976077	0.523017	0.0810146
circ0470	miR-186	RB1	0.209364	0.513717	-0.11044	0.732586	0.753368	0.00466785
circ0470	miR-186	TMOD1	0.209364	0.513717	0.464772	0.127919	0.546537	0.0659651
circPFKFB1	miR-186	ACTN2	-0.210014	0.512381	0.150963	0.63955	-0.49975	0.0980497
circPFKFB1	miR-186	COPS2	-0.210014	0.512381	-0.0369006	0.909355	0.00532694	0.986891
circPFKFB1	miR-186	FKBP1A	-0.210014	0.512381	0.212674	0.506929	0.103306	0.749354
circPFKFB1	miR-186	FOXN2	-0.210014	0.512381	-0.103176	0.749659	-0.0955563	0.767682
circPFKFB1	miR-186	H3F3A	-0.210014	0.512381	0.0378213	0.907101	-0.13929	0.66593
circPFKFB1	miR-186	IFRD1	-0.210014	0.512381	0.195352	0.542888	-0.192548	0.548808
circPFKFB1	miR-186	PLAGL1	-0.210014	0.512381	0.00972227	0.976077	-0.610415	0.0350284
circPFKFB1	miR-186	RB1	-0.210014	0.512381	-0.11044	0.732586	-0.095315	0.768254
circPFKFB1	miR-186	TMOD1	-0.210014	0.512381	0.464772	0.127919	-0.0913127	0.777765
circZNF292	miR-186	ACTN2	0.150495	0.6406	0.150963	0.63955	0.869057	0.000242357
circZNF292	miR-186	COPS2	0.150495	0.6406	-0.0369006	0.909355	0.635184	0.0264627
circZNF292	miR-186	FKBP1A	0.150495	0.6406	0.212674	0.506929	0.505307	0.0937803
circZNF292	miR-186	FOXN2	0.150495	0.6406	-0.103176	0.749659	0.557746	0.0595239
circZNF292	miR-186	H3F3A	0.150495	0.6406	0.0378213	0.907101	0.712929	0.0092531
circZNF292	miR-186	IFRD1	0.150495	0.6406	0.195352	0.542888	0.590217	0.0433523
circZNF292	miR-186	PLAGL1	0.150495	0.6406	0.00972227	0.976077	0.873715	0.000203861
circZNF292	miR-186	RB1	0.150495	0.6406	-0.11044	0.732586	0.624151	0.0300654
circZNF292	miR-186	TMOD1	0.150495	0.6406	0.464772	0.127919	0.429273	0.163742
circDEK	miR-186	ACTN2	0.0716961	0.824764	0.150963	0.63955	0.707375	0.0100784
circDEK	miR-186	COPS2	0.0716961	0.824764	-0.0369006	0.909355	0.885816	0.000125831
circDEK	miR-186	FKBP1A	0.0716961	0.824764	0.212674	0.506929	0.679125	0.0151501
circDEK	miR-186	FOXN2	0.0716961	0.824764	-0.103176	0.749659	0.724896	0.0076473
circDEK	miR-186	H3F3A	0.0716961	0.824764	0.0378213	0.907101	0.787462	0.0023608
circDEK	miR-186	IFRD1	0.0716961	0.824764	0.195352	0.542888	0.761798	0.00398388
circDEK	miR-186	PLAGL1	0.0716961	0.824764	0.00972227	0.976077	0.660546	0.0193775
circDEK	miR-186	RB1	0.0716961	0.824764	-0.11044	0.732586	0.864704	0.000283233
circDEK	miR-186	TMOD1	0.0716961	0.824764	0.464772	0.127919	0.407331	0.18876
circKIAA2026	miR-196b-5p	TMOD1	0.0129636	0.968105	0.0617961	0.848695	0.588353	0.0441849
circUBE3A	miR-196b-5p	TMOD1	0.116887	0.717524	0.0617961	0.848695	0.650724	0.0219322
circ0470	miR-199a-5p	ACTN2	0.126417	0.695431	-0.391108	0.208697	0.672539	0.0165618
circ0470	miR-199a-5p	ATF3	0.126417	0.695431	0.320601	0.309625	-0.318889	0.312363
circ0470	miR-199a-5p	RB1	0.126417	0.695431	-0.206413	0.519804	0.753368	0.00466785
circ0470	miR-199a-5p	TPM3	0.126417	0.695431	-0.0819445	0.800134	0.774081	0.00312674
circEZH1	miR-199a-5p	ACTN2	0.110257	0.733015	-0.391108	0.208697	0.591392	0.0428328
circEZH1	miR-199a-5p	ATF3	0.110257	0.733015	0.320601	0.309625	-0.469924	0.123187
circEZH1	miR-199a-5p	RB1	0.110257	0.733015	-0.206413	0.519804	0.286642	0.366375
circEZH1	miR-199a-5p	TPM3	0.110257	0.733015	-0.0819445	0.800134	0.413537	0.181458
circPARD3	miR-199a-5p	ACTN2	-0.293971	0.353694	-0.391108	0.208697	0.789202	0.00227292
circPARD3	miR-199a-5p	ATF3	-0.293971	0.353694	0.320601	0.309625	-0.500885	0.0971669
circPARD3	miR-199a-5p	RB1	-0.293971	0.353694	-0.206413	0.519804	0.296629	0.349153
circPARD3	miR-199a-5p	TPM3	-0.293971	0.353694	-0.0819445	0.800134	0.484394	0.110517
circ0470	miR-199b-5p	ACTN2	0.168378	0.600901	-0.331073	0.293176	0.672539	0.0165618
circ0470	miR-199b-5p	ATF3	0.168378	0.600901	0.345201	0.271784	-0.318889	0.312363
circ0470	miR-199b-5p	RB1	0.168378	0.600901	-0.15619	0.627858	0.753368	0.00466785
circ0470	miR-199b-5p	TPM3	0.168378	0.600901	-0.0248353	0.938932	0.774081	0.00312674
circEZH1	miR-199b-5p	ACTN2	0.10336	0.749227	-0.331073	0.293176	0.591392	0.0428328
circEZH1	miR-199b-5p	ATF3	0.10336	0.749227	0.345201	0.271784	-0.469924	0.123187
circEZH1	miR-199b-5p	RB1	0.10336	0.749227	-0.15619	0.627858	0.286642	0.366375
circEZH1	miR-199b-5p	TPM3	0.10336	0.749227	-0.0248353	0.938932	0.413537	0.181458
circPARD3	miR-199b-5p	ACTN2	-0.244803	0.443171	-0.331073	0.293176	0.789202	0.00227292
circPARD3	miR-199b-5p	ATF3	-0.244803	0.443171	0.345201	0.271784	-0.500885	0.0971669
circPARD3	miR-199b-5p	RB1	-0.244803	0.443171	-0.15619	0.627858	0.296629	0.349153
circPARD3	miR-199b-5p	TPM3	-0.244803	0.443171	-0.0248353	0.938932	0.484394	0.110517
circKANSL1L_4	miR-19a	FBXO40	-0.145034	0.652904	-0.26341	0.408113	0.430623	0.162274
circKANSL1L_4	miR-19a	MEF2D	-0.145034	0.652904	0.57704	0.0494834	-0.353645	0.259441
circKANSL1L_4	miR-19a	MYBPC1	-0.145034	0.652904	-0.237313	0.457677	0.844943	0.000540799
circKANSL1L_4	miR-19a	SCN7A	-0.145034	0.652904	-0.331118	0.293107	0.755867	0.00445651
circKANSL1L_4	miR-19b	FBXO40	-0.147529	0.647271	-0.267451	0.400687	0.430623	0.162274
circKANSL1L_4	miR-19b	MEF2D	-0.147529	0.647271	0.575226	0.0503726	-0.353645	0.259441
circKANSL1L_4	miR-19b	MYBPC1	-0.147529	0.647271	-0.232037	0.468028	0.844943	0.000540799
circKANSL1L_4	miR-19b	SCN7A	-0.147529	0.647271	-0.338598	0.281668	0.755867	0.00445651
circ0470	miR-214	ACTN2	0.0601753	0.852625	-0.203364	0.526124	0.672539	0.0165618
circ0470	miR-214	COPS2	0.0601753	0.852625	-0.166572	0.604867	0.801705	0.00171242
circ0470	miR-214	FKBP1A	0.0601753	0.852625	-0.152745	0.635554	0.563933	0.056162
circ0470	miR-214	MAFF	0.0601753	0.852625	0.349274	0.265789	0.113483	0.725465
circ0470	miR-214	MEF2D	0.0601753	0.852625	0.463966	0.128669	-0.24318	0.446294
circ0470	miR-214	TMOD1	0.0601753	0.852625	0.13737	0.670303	0.546537	0.0659651
circMSH3	miR-214	ACTN2	0.11238	0.728045	-0.203364	0.526124	0.709671	0.00973092
circMSH3	miR-214	COPS2	0.11238	0.728045	-0.166572	0.604867	0.775937	0.00301049
circMSH3	miR-214	FKBP1A	0.11238	0.728045	-0.152745	0.635554	0.476663	0.117174
circMSH3	miR-214	MAFF	0.11238	0.728045	0.349274	0.265789	0.461913	0.130595
circMSH3	miR-214	MEF2D	0.11238	0.728045	0.463966	0.128669	-0.106349	0.742189
circMSH3	miR-214	TMOD1	0.11238	0.728045	0.13737	0.670303	0.410863	0.184583
circATF7IP	miR-214	ACTN2	-0.295798	0.350569	-0.203364	0.526124	-0.460638	0.1318
circATF7IP	miR-214	COPS2	-0.295798	0.350569	-0.166572	0.604867	-0.427477	0.165706
circATF7IP	miR-214	FKBP1A	-0.295798	0.350569	-0.152745	0.635554	-0.0494068	0.878808
circATF7IP	miR-214	MAFF	-0.295798	0.350569	0.349274	0.265789	-0.257172	0.419707
circATF7IP	miR-214	MEF2D	-0.295798	0.350569	0.463966	0.128669	-0.0477941	0.882739
circATF7IP	miR-214	TMOD1	-0.295798	0.350569	0.13737	0.670303	-0.152026	0.637166
circEZH1	miR-218	ACTN2	0.318024	0.313751	-0.280446	0.377281	0.591392	0.0428328
circEZH1	miR-218	ANKRD1	0.318024	0.313751	-0.101492	0.753633	0.261853	0.410991
circEZH1	miR-218	FOXN2	0.318024	0.313751	-0.350423	0.264112	0.297618	0.347471
circEZH1	miR-218	MEF2D	0.318024	0.313751	0.554752	0.0611997	0.331815	0.29203
circKIAA2026	miR-218	ACTN2	0.0839032	0.795445	-0.280446	0.377281	0.674155	0.0162069
circKIAA2026	miR-218	ANKRD1	0.0839032	0.795445	-0.101492	0.753633	0.690613	0.0129023
circKIAA2026	miR-218	FOXN2	0.0839032	0.795445	-0.350423	0.264112	0.663061	0.0187602
circKIAA2026	miR-218	MEF2D	0.0839032	0.795445	0.554752	0.0611997	0.105379	0.744469
circMSH3	miR-218	ACTN2	-0.0502566	0.876737	-0.280446	0.377281	0.709671	0.00973092
circMSH3	miR-218	ANKRD1	-0.0502566	0.876737	-0.101492	0.753633	0.426919	0.166319
circMSH3	miR-218	FOXN2	-0.0502566	0.876737	-0.350423	0.264112	0.793958	0.00204531
circMSH3	miR-218	MEF2D	-0.0502566	0.876737	0.554752	0.0611997	-0.106349	0.742189
circST7L	miR-218	ACTN2	-0.0679217	0.833873	-0.280446	0.377281	0.57833	0.0488578
circST7L	miR-218	ANKRD1	-0.0679217	0.833873	-0.101492	0.753633	0.200372	0.532357
circST7L	miR-218	FOXN2	-0.0679217	0.833873	-0.350423	0.264112	0.542587	0.0683457
circST7L	miR-218	MEF2D	-0.0679217	0.833873	0.554752	0.0611997	0.359589	0.250952
circEZH1	miR-218-5p	ACTN2	0.318024	0.313751	-0.280446	0.377281	0.591392	0.0428328
circEZH1	miR-218-5p	ANKRD1	0.318024	0.313751	-0.101492	0.753633	0.261853	0.410991
circEZH1	miR-218-5p	FOXN2	0.318024	0.313751	-0.350423	0.264112	0.297618	0.347471
circEZH1	miR-218-5p	MEF2D	0.318024	0.313751	0.554752	0.0611997	0.331815	0.29203
circKIAA2026	miR-218-5p	ACTN2	0.0839032	0.795445	-0.280446	0.377281	0.674155	0.0162069
circKIAA2026	miR-218-5p	ANKRD1	0.0839032	0.795445	-0.101492	0.753633	0.690613	0.0129023
circKIAA2026	miR-218-5p	FOXN2	0.0839032	0.795445	-0.350423	0.264112	0.663061	0.0187602
circKIAA2026	miR-218-5p	MEF2D	0.0839032	0.795445	0.554752	0.0611997	0.105379	0.744469
circMSH3	miR-218-5p	ACTN2	-0.0502566	0.876737	-0.280446	0.377281	0.709671	0.00973092
circMSH3	miR-218-5p	ANKRD1	-0.0502566	0.876737	-0.101492	0.753633	0.426919	0.166319
circMSH3	miR-218-5p	FOXN2	-0.0502566	0.876737	-0.350423	0.264112	0.793958	0.00204531
circMSH3	miR-218-5p	MEF2D	-0.0502566	0.876737	0.554752	0.0611997	-0.106349	0.742189
circST7L	miR-218-5p	ACTN2	-0.0679217	0.833873	-0.280446	0.377281	0.57833	0.0488578
circST7L	miR-218-5p	ANKRD1	-0.0679217	0.833873	-0.101492	0.753633	0.200372	0.532357
circST7L	miR-218-5p	FOXN2	-0.0679217	0.833873	-0.350423	0.264112	0.542587	0.0683457
circST7L	miR-218-5p	MEF2D	-0.0679217	0.833873	0.554752	0.0611997	0.359589	0.250952
circEZH1	miR-218b	ACTN2	0.317473	0.314636	-0.280789	0.376672	0.591392	0.0428328
circEZH1	miR-218b	ANKRD1	0.317473	0.314636	-0.102078	0.752251	0.261853	0.410991
circEZH1	miR-218b	FOXN2	0.317473	0.314636	-0.350433	0.264097	0.297618	0.347471
circEZH1	miR-218b	MEF2D	0.317473	0.314636	0.553634	0.0618335	0.331815	0.29203
circKIAA2026	miR-218b	ACTN2	0.0834058	0.796635	-0.280789	0.376672	0.674155	0.0162069
circKIAA2026	miR-218b	ANKRD1	0.0834058	0.796635	-0.102078	0.752251	0.690613	0.0129023
circKIAA2026	miR-218b	FOXN2	0.0834058	0.796635	-0.350433	0.264097	0.663061	0.0187602
circKIAA2026	miR-218b	MEF2D	0.0834058	0.796635	0.553634	0.0618335	0.105379	0.744469
circMSH3	miR-218b	ACTN2	-0.0499805	0.87741	-0.280789	0.376672	0.709671	0.00973092
circMSH3	miR-218b	ANKRD1	-0.0499805	0.87741	-0.102078	0.752251	0.426919	0.166319
circMSH3	miR-218b	FOXN2	-0.0499805	0.87741	-0.350433	0.264097	0.793958	0.00204531
circMSH3	miR-218b	MEF2D	-0.0499805	0.87741	0.553634	0.0618335	-0.106349	0.742189
circST7L	miR-218b	ACTN2	-0.0688212	0.8317	-0.280789	0.376672	0.57833	0.0488578
circST7L	miR-218b	ANKRD1	-0.0688212	0.8317	-0.102078	0.752251	0.200372	0.532357
circST7L	miR-218b	FOXN2	-0.0688212	0.8317	-0.350433	0.264097	0.542587	0.0683457
circST7L	miR-218b	MEF2D	-0.0688212	0.8317	0.553634	0.0618335	0.359589	0.250952
circ4082	miR-22-3p	BIN1	0.696946	0.0117744	-0.028162	0.930768	0.215982	0.500184
circ4082	miR-22-3p	CLCN1	0.696946	0.0117744	-0.291072	0.358681	0.147001	0.648462
circ4082	miR-22-3p	FKBP1A	0.696946	0.0117744	0.220785	0.490462	0.424551	0.168938
circ4082	miR-22-3p	IFRD1	0.696946	0.0117744	-0.0632065	0.845278	0.449355	0.14278
circ4082	miR-22-3p	LEMD2	0.696946	0.0117744	0.230615	0.470838	0.77667	0.00296554
circ4082	miR-22-3p	MAFF	0.696946	0.0117744	-0.114549	0.722977	0.279762	0.378495
circPFKFB1	miR-22-3p	BIN1	-0.0982377	0.761327	-0.028162	0.930768	-0.5705	0.0527419
circPFKFB1	miR-22-3p	CLCN1	-0.0982377	0.761327	-0.291072	0.358681	-0.325569	0.301759
circPFKFB1	miR-22-3p	FKBP1A	-0.0982377	0.761327	0.220785	0.490462	0.103306	0.749354
circPFKFB1	miR-22-3p	IFRD1	-0.0982377	0.761327	-0.0632065	0.845278	-0.192548	0.548808
circPFKFB1	miR-22-3p	LEMD2	-0.0982377	0.761327	0.230615	0.470838	-0.436137	0.15637
circPFKFB1	miR-22-3p	MAFF	-0.0982377	0.761327	-0.114549	0.722977	-0.75056	0.00491431
circZCCHC6	miR-22-3p	BIN1	0.372758	0.232731	-0.028162	0.930768	0.446047	0.146107
circZCCHC6	miR-22-3p	CLCN1	0.372758	0.232731	-0.291072	0.358681	0.514909	0.0867028
circZCCHC6	miR-22-3p	FKBP1A	0.372758	0.232731	0.220785	0.490462	0.766083	0.00366688
circZCCHC6	miR-22-3p	IFRD1	0.372758	0.232731	-0.0632065	0.845278	0.790477	0.00221008
circZCCHC6	miR-22-3p	LEMD2	0.372758	0.232731	0.230615	0.470838	0.864429	0.000285983
circZCCHC6	miR-22-3p	MAFF	0.372758	0.232731	-0.114549	0.722977	0.516779	0.0853674
circZNF292	miR-22-3p	BIN1	0.351563	0.262453	-0.028162	0.930768	0.42695	0.166285
circZNF292	miR-22-3p	CLCN1	0.351563	0.262453	-0.291072	0.358681	0.389832	0.210317
circZNF292	miR-22-3p	FKBP1A	0.351563	0.262453	0.220785	0.490462	0.505307	0.0937803
circZNF292	miR-22-3p	IFRD1	0.351563	0.262453	-0.0632065	0.845278	0.590217	0.0433523
circZNF292	miR-22-3p	LEMD2	0.351563	0.262453	0.230615	0.470838	0.793949	0.00204572
circZNF292	miR-22-3p	MAFF	0.351563	0.262453	-0.114549	0.722977	0.602453	0.0381593
circ4082	miR-22-5p	BIN1	0.78847	0.00230955	0.0535221	0.868787	0.215982	0.500184
circKIAA2026	miR-22-5p	BIN1	0.0993258	0.758752	0.0535221	0.868787	0.207291	0.51799
circNR1H3	miR-22-5p	BIN1	0.447477	0.144662	0.0535221	0.868787	0.617231	0.0324979
circPREPL	miR-22-5p	BIN1	0.291921	0.357218	0.0535221	0.868787	0.204407	0.523958
circPUM2	miR-22-5p	BIN1	0.362007	0.247545	0.0535221	0.868787	0.253125	0.427314
circTRMT11	miR-22-5p	BIN1	0.590465	0.0432424	0.0535221	0.868787	0.267027	0.401463
circATF7IP	miR-22-5p	BIN1	-0.196784	0.539876	0.0535221	0.868787	0.0545907	0.866188
circ4082	miR-22-5p	COPS2	0.78847	0.00230955	0.419556	0.174547	0.680062	0.0149567
circKIAA2026	miR-22-5p	COPS2	0.0993258	0.758752	0.419556	0.174547	0.689733	0.0130653
circNR1H3	miR-22-5p	COPS2	0.447477	0.144662	0.419556	0.174547	0.50475	0.094203
circPREPL	miR-22-5p	COPS2	0.291921	0.357218	0.419556	0.174547	0.696664	0.011823
circPUM2	miR-22-5p	COPS2	0.362007	0.247545	0.419556	0.174547	0.448998	0.143136
circTRMT11	miR-22-5p	COPS2	0.590465	0.0432424	0.419556	0.174547	0.59876	0.0396772
circATF7IP	miR-22-5p	COPS2	-0.196784	0.539876	0.419556	0.174547	-0.427477	0.165706
circ4082	miR-22-5p	MEF2D	0.78847	0.00230955	-0.381325	0.221314	-0.186679	0.561283
circKIAA2026	miR-22-5p	MEF2D	0.0993258	0.758752	-0.381325	0.221314	0.105379	0.744469
circNR1H3	miR-22-5p	MEF2D	0.447477	0.144662	-0.381325	0.221314	0.302301	0.339567
circPREPL	miR-22-5p	MEF2D	0.291921	0.357218	-0.381325	0.221314	0.0834968	0.796418
circPUM2	miR-22-5p	MEF2D	0.362007	0.247545	-0.381325	0.221314	0.275672	0.385796
circTRMT11	miR-22-5p	MEF2D	0.590465	0.0432424	-0.381325	0.221314	-0.181323	0.572766
circATF7IP	miR-22-5p	MEF2D	-0.196784	0.539876	-0.381325	0.221314	-0.0477941	0.882739
circ4082	miR-23a	FOXN2	-0.332391	0.291141	0.0209337	0.948514	0.737915	0.00614773
circKIAA2026	miR-23a	FOXN2	0.368077	0.239115	0.0209337	0.948514	0.663061	0.0187602
circMYBPC2_3	miR-23a	FOXN2	0.305264	0.334618	0.0209337	0.948514	0.0114154	0.971912
circZNF292	miR-23a	FOXN2	0.00132683	0.996735	0.0209337	0.948514	0.557746	0.0595239
circATF7IP	miR-23a	FOXN2	-0.176255	0.58372	0.0209337	0.948514	-0.413608	0.181375
circ4082	miR-23a	PLAGL1	-0.332391	0.291141	-0.0815116	0.801172	0.727357	0.00734482
circKIAA2026	miR-23a	PLAGL1	0.368077	0.239115	-0.0815116	0.801172	0.623336	0.0303448
circMYBPC2_3	miR-23a	PLAGL1	0.305264	0.334618	-0.0815116	0.801172	-0.526707	0.0785127
circZNF292	miR-23a	PLAGL1	0.00132683	0.996735	-0.0815116	0.801172	0.873715	0.000203861
circATF7IP	miR-23a	PLAGL1	-0.176255	0.58372	-0.0815116	0.801172	-0.470278	0.122867
circ4082	miR-23a	TMOD1	-0.332391	0.291141	0.45412	0.138073	0.340803	0.278345
circKIAA2026	miR-23a	TMOD1	0.368077	0.239115	0.45412	0.138073	0.588353	0.0441849
circMYBPC2_3	miR-23a	TMOD1	0.305264	0.334618	0.45412	0.138073	0.0436618	0.892824
circZNF292	miR-23a	TMOD1	0.00132683	0.996735	0.45412	0.138073	0.429273	0.163742
circATF7IP	miR-23a	TMOD1	-0.176255	0.58372	0.45412	0.138073	-0.152026	0.637166
circ4082	miR-23a	TPM3	-0.332391	0.291141	0.132531	0.681367	0.754823	0.00454388
circKIAA2026	miR-23a	TPM3	0.368077	0.239115	0.132531	0.681367	0.644164	0.0237697
circMYBPC2_3	miR-23a	TPM3	0.305264	0.334618	0.132531	0.681367	-0.107143	0.740322
circZNF292	miR-23a	TPM3	0.00132683	0.996735	0.132531	0.681367	0.778698	0.00284378
circATF7IP	miR-23a	TPM3	-0.176255	0.58372	0.132531	0.681367	-0.385331	0.216094
circ4082	miR-23b	FOXN2	-0.270515	0.395104	0.122997	0.703335	0.737915	0.00614773
circKIAA2026	miR-23b	FOXN2	0.406419	0.189849	0.122997	0.703335	0.663061	0.0187602
circMYBPC2_3	miR-23b	FOXN2	0.392378	0.207092	0.122997	0.703335	0.0114154	0.971912
circZNF292	miR-23b	FOXN2	0.00824558	0.97971	0.122997	0.703335	0.557746	0.0595239
circATF7IP	miR-23b	FOXN2	-0.137672	0.669615	0.122997	0.703335	-0.413608	0.181375
circ4082	miR-23b	PLAGL1	-0.270515	0.395104	0.0538699	0.867941	0.727357	0.00734482
circKIAA2026	miR-23b	PLAGL1	0.406419	0.189849	0.0538699	0.867941	0.623336	0.0303448
circMYBPC2_3	miR-23b	PLAGL1	0.392378	0.207092	0.0538699	0.867941	-0.526707	0.0785127
circZNF292	miR-23b	PLAGL1	0.00824558	0.97971	0.0538699	0.867941	0.873715	0.000203861
circATF7IP	miR-23b	PLAGL1	-0.137672	0.669615	0.0538699	0.867941	-0.470278	0.122867
circ4082	miR-23b	TMOD1	-0.270515	0.395104	0.370031	0.236437	0.340803	0.278345
circKIAA2026	miR-23b	TMOD1	0.406419	0.189849	0.370031	0.236437	0.588353	0.0441849
circMYBPC2_3	miR-23b	TMOD1	0.392378	0.207092	0.370031	0.236437	0.0436618	0.892824
circZNF292	miR-23b	TMOD1	0.00824558	0.97971	0.370031	0.236437	0.429273	0.163742
circATF7IP	miR-23b	TMOD1	-0.137672	0.669615	0.370031	0.236437	-0.152026	0.637166
circ4082	miR-23b	TPM3	-0.270515	0.395104	0.223288	0.48543	0.754823	0.00454388
circKIAA2026	miR-23b	TPM3	0.406419	0.189849	0.223288	0.48543	0.644164	0.0237697
circMYBPC2_3	miR-23b	TPM3	0.392378	0.207092	0.223288	0.48543	-0.107143	0.740322
circZNF292	miR-23b	TPM3	0.00824558	0.97971	0.223288	0.48543	0.778698	0.00284378
circATF7IP	miR-23b	TPM3	-0.137672	0.669615	0.223288	0.48543	-0.385331	0.216094
circANKRD2	miR-24-3p	BIN1	0.415406	0.179294	0.278082	0.381485	0.564137	0.0560535
circANKRD2	miR-24-3p	FKBP1A	0.415406	0.179294	-0.0493977	0.87883	0.241682	0.449188
circANKRD2	miR-24-3p	IFRD1	0.415406	0.179294	-0.0196889	0.951572	0.33658	0.284727
circANKRD2	miR-24-3p	MAFF	0.415406	0.179294	0.335178	0.286865	0.5977	0.0401206
circANKRD2	miR-24-3p	MEF2D	0.415406	0.179294	0.62798	0.0287774	0.508538	0.0913568
circ4082	miR-27a	ANKRD1	-0.319282	0.311732	0.497557	0.0997696	0.397761	0.200372
circKIAA2026	miR-27a	ANKRD1	0.579011	0.0485295	0.497557	0.0997696	0.690613	0.0129023
circPFKFB1	miR-27a	ANKRD1	0.0193587	0.952383	0.497557	0.0997696	-0.287378	0.365091
circTRMT11	miR-27a	ANKRD1	-0.0730268	0.821557	0.497557	0.0997696	0.379855	0.223249
circ4082	miR-27a	IFRD1	-0.319282	0.311732	0.225564	0.480875	0.449355	0.14278
circKIAA2026	miR-27a	IFRD1	0.579011	0.0485295	0.225564	0.480875	0.666731	0.0178851
circPFKFB1	miR-27a	IFRD1	0.0193587	0.952383	0.225564	0.480875	-0.192548	0.548808
circTRMT11	miR-27a	IFRD1	-0.0730268	0.821557	0.225564	0.480875	0.434158	0.158474
circ4082	miR-27a	RB1	-0.319282	0.311732	0.0545792	0.866216	0.764392	0.00378957
circKIAA2026	miR-27a	RB1	0.579011	0.0485295	0.0545792	0.866216	0.70485	0.0104712
circPFKFB1	miR-27a	RB1	0.0193587	0.952383	0.0545792	0.866216	-0.095315	0.768254
circTRMT11	miR-27a	RB1	-0.0730268	0.821557	0.0545792	0.866216	0.651379	0.0217545
circ4082	miR-27b-3p	ANKRD1	-0.326988	0.299534	0.454474	0.137728	0.397761	0.200372
circKIAA2026	miR-27b-3p	ANKRD1	0.587022	0.0447865	0.454474	0.137728	0.690613	0.0129023
circPFKFB1	miR-27b-3p	ANKRD1	0.0524353	0.871432	0.454474	0.137728	-0.287378	0.365091
circTRMT11	miR-27b-3p	ANKRD1	-0.0821112	0.799735	0.454474	0.137728	0.379855	0.223249
circ4082	miR-27b-3p	IFRD1	-0.326988	0.299534	0.218694	0.494684	0.449355	0.14278
circKIAA2026	miR-27b-3p	IFRD1	0.587022	0.0447865	0.218694	0.494684	0.666731	0.0178851
circPFKFB1	miR-27b-3p	IFRD1	0.0524353	0.871432	0.218694	0.494684	-0.192548	0.548808
circTRMT11	miR-27b-3p	IFRD1	-0.0821112	0.799735	0.218694	0.494684	0.434158	0.158474
circ4082	miR-27b-3p	RB1	-0.326988	0.299534	0.0787903	0.807698	0.764392	0.00378957
circKIAA2026	miR-27b-3p	RB1	0.587022	0.0447865	0.0787903	0.807698	0.70485	0.0104712
circPFKFB1	miR-27b-3p	RB1	0.0524353	0.871432	0.0787903	0.807698	-0.095315	0.768254
circTRMT11	miR-27b-3p	RB1	-0.0821112	0.799735	0.0787903	0.807698	0.651379	0.0217545
circ4082	miR-296-3p	ATF3	-0.633122	0.0271111	0.0877995	0.786136	-0.411667	0.18364
circ4082	miR-296-3p	MAFF	-0.633122	0.0271111	0.318252	0.313384	0.279762	0.378495
circ4082	miR-296-3p	MEF2D	-0.633122	0.0271111	0.597647	0.0401428	-0.186679	0.561283
circ4082	miR-296-5p	ATF3	-0.573184	0.0513869	0.0441069	0.891737	-0.411667	0.18364
circ4082	miR-296-5p	BIN1	-0.573184	0.0513869	-0.0258209	0.936513	0.215982	0.500184
circ4082	miR-296-5p	CLCN1	-0.573184	0.0513869	0.44909	0.143044	0.147001	0.648462
circ4082	miR-296-5p	MAFF	-0.573184	0.0513869	0.0359548	0.91167	0.279762	0.378495
circKANSL1L_4	miR-299	FKBP1A	-0.0295294	0.927415	0.128589	0.690425	0.866963	0.000261395
circKANSL1L_4	miR-299	TPM4	-0.0295294	0.927415	-0.0401201	0.901478	0.845087	0.00053844
circATF7IP	miR-299	FKBP1A	0.086227	0.78989	0.128589	0.690425	-0.0494068	0.878808
circATF7IP	miR-299	TPM4	0.086227	0.78989	-0.0401201	0.901478	-0.407008	0.189146
circ0470	miR-30a-5p	COPS2	-0.0609483	0.85075	-0.193522	0.546749	0.801705	0.00171242
circ0470	miR-30a-5p	FKBP1A	-0.0609483	0.85075	-0.00287571	0.992923	0.563933	0.056162
circ0470	miR-30a-5p	IFRD1	-0.0609483	0.85075	0.00896975	0.977928	0.533558	0.0740075
circ0470	miR-30a-5p	MEF2D	-0.0609483	0.85075	0.262674	0.409472	-0.24318	0.446294
circ0470	miR-30a-5p	RB1	-0.0609483	0.85075	-0.185209	0.564426	0.753368	0.00466785
circ0470	miR-30a-5p	SCN7A	-0.0609483	0.85075	-0.297363	0.347904	0.776768	0.00295955
circPREPL	miR-30a-5p	COPS2	0.0463235	0.886326	-0.193522	0.546749	0.696664	0.011823
circPREPL	miR-30a-5p	FKBP1A	0.0463235	0.886326	-0.00287571	0.992923	0.415711	0.178943
circPREPL	miR-30a-5p	IFRD1	0.0463235	0.886326	0.00896975	0.977928	0.567831	0.0541137
circPREPL	miR-30a-5p	MEF2D	0.0463235	0.886326	0.262674	0.409472	0.0834968	0.796418
circPREPL	miR-30a-5p	RB1	0.0463235	0.886326	-0.185209	0.564426	0.693472	0.0123837
circPREPL	miR-30a-5p	SCN7A	0.0463235	0.886326	-0.297363	0.347904	0.705141	0.0104253
circPTGES3	miR-30a-5p	COPS2	0.264195	0.406665	-0.193522	0.546749	0.632742	0.0272318
circPTGES3	miR-30a-5p	FKBP1A	0.264195	0.406665	-0.00287571	0.992923	0.626509	0.0292675
circPTGES3	miR-30a-5p	IFRD1	0.264195	0.406665	0.00896975	0.977928	0.865532	0.000275067
circPTGES3	miR-30a-5p	MEF2D	0.264195	0.406665	0.262674	0.409472	0.0892422	0.782696
circPTGES3	miR-30a-5p	RB1	0.264195	0.406665	-0.185209	0.564426	0.600453	0.0389763
circPTGES3	miR-30a-5p	SCN7A	0.264195	0.406665	-0.297363	0.347904	0.470767	0.122424
circ0470	miR-30b-5p	COPS2	0.267181	0.401182	0.214226	0.503758	0.801705	0.00171242
circ0470	miR-30b-5p	FKBP1A	0.267181	0.401182	0.590297	0.0433164	0.563933	0.056162
circ0470	miR-30b-5p	IFRD1	0.267181	0.401182	0.408122	0.18782	0.533558	0.0740075
circ0470	miR-30b-5p	MEF2D	0.267181	0.401182	0.132778	0.680802	-0.24318	0.446294
circ0470	miR-30b-5p	RB1	0.267181	0.401182	0.156649	0.626834	0.753368	0.00466785
circ0470	miR-30b-5p	SCN7A	0.267181	0.401182	0.122895	0.70357	0.776768	0.00295955
circPREPL	miR-30b-5p	COPS2	0.392772	0.206595	0.214226	0.503758	0.696664	0.011823
circPREPL	miR-30b-5p	FKBP1A	0.392772	0.206595	0.590297	0.0433164	0.415711	0.178943
circPREPL	miR-30b-5p	IFRD1	0.392772	0.206595	0.408122	0.18782	0.567831	0.0541137
circPREPL	miR-30b-5p	MEF2D	0.392772	0.206595	0.132778	0.680802	0.0834968	0.796418
circPREPL	miR-30b-5p	RB1	0.392772	0.206595	0.156649	0.626834	0.693472	0.0123837
circPREPL	miR-30b-5p	SCN7A	0.392772	0.206595	0.122895	0.70357	0.705141	0.0104253
circPTGES3	miR-30b-5p	COPS2	0.577582	0.0492196	0.214226	0.503758	0.632742	0.0272318
circPTGES3	miR-30b-5p	FKBP1A	0.577582	0.0492196	0.590297	0.0433164	0.626509	0.0292675
circPTGES3	miR-30b-5p	IFRD1	0.577582	0.0492196	0.408122	0.18782	0.865532	0.000275067
circPTGES3	miR-30b-5p	MEF2D	0.577582	0.0492196	0.132778	0.680802	0.0892422	0.782696
circPTGES3	miR-30b-5p	RB1	0.577582	0.0492196	0.156649	0.626834	0.600453	0.0389763
circPTGES3	miR-30b-5p	SCN7A	0.577582	0.0492196	0.122895	0.70357	0.470767	0.122424
circ0470	miR-30c-5p	COPS2	0.341103	0.277894	0.52268	0.0812461	0.801705	0.00171242
circ0470	miR-30c-5p	FKBP1A	0.341103	0.277894	0.539921	0.0699854	0.563933	0.056162
circ0470	miR-30c-5p	IFRD1	0.341103	0.277894	0.702603	0.0108302	0.533558	0.0740075
circ0470	miR-30c-5p	MEF2D	0.341103	0.277894	-0.0906913	0.779244	-0.24318	0.446294
circ0470	miR-30c-5p	RB1	0.341103	0.277894	0.476684	0.117155	0.753368	0.00466785
circ0470	miR-30c-5p	SCN7A	0.341103	0.277894	0.300129	0.343222	0.776768	0.00295955
circPREPL	miR-30c-5p	COPS2	0.377965	0.225751	0.52268	0.0812461	0.696664	0.011823
circPREPL	miR-30c-5p	FKBP1A	0.377965	0.225751	0.539921	0.0699854	0.415711	0.178943
circPREPL	miR-30c-5p	IFRD1	0.377965	0.225751	0.702603	0.0108302	0.567831	0.0541137
circPREPL	miR-30c-5p	MEF2D	0.377965	0.225751	-0.0906913	0.779244	0.0834968	0.796418
circPREPL	miR-30c-5p	RB1	0.377965	0.225751	0.476684	0.117155	0.693472	0.0123837
circPREPL	miR-30c-5p	SCN7A	0.377965	0.225751	0.300129	0.343222	0.705141	0.0104253
circPTGES3	miR-30c-5p	COPS2	0.874055	0.000201257	0.52268	0.0812461	0.632742	0.0272318
circPTGES3	miR-30c-5p	FKBP1A	0.874055	0.000201257	0.539921	0.0699854	0.626509	0.0292675
circPTGES3	miR-30c-5p	IFRD1	0.874055	0.000201257	0.702603	0.0108302	0.865532	0.000275067
circPTGES3	miR-30c-5p	MEF2D	0.874055	0.000201257	-0.0906913	0.779244	0.0892422	0.782696
circPTGES3	miR-30c-5p	RB1	0.874055	0.000201257	0.476684	0.117155	0.600453	0.0389763
circPTGES3	miR-30c-5p	SCN7A	0.874055	0.000201257	0.300129	0.343222	0.470767	0.122424
circ0470	miR-30d	COPS2	0.0997347	0.757785	-0.0438857	0.892277	0.801705	0.00171242
circ0470	miR-30d	FKBP1A	0.0997347	0.757785	0.0990602	0.759381	0.563933	0.056162
circ0470	miR-30d	IFRD1	0.0997347	0.757785	0.147878	0.646485	0.533558	0.0740075
circ0470	miR-30d	MEF2D	0.0997347	0.757785	0.286824	0.366058	-0.24318	0.446294
circ0470	miR-30d	RB1	0.0997347	0.757785	-0.054508	0.866389	0.753368	0.00466785
circ0470	miR-30d	SCN7A	0.0997347	0.757785	-0.183136	0.568869	0.776768	0.00295955
circPREPL	miR-30d	COPS2	0.22032	0.491399	-0.0438857	0.892277	0.696664	0.011823
circPREPL	miR-30d	FKBP1A	0.22032	0.491399	0.0990602	0.759381	0.415711	0.178943
circPREPL	miR-30d	IFRD1	0.22032	0.491399	0.147878	0.646485	0.567831	0.0541137
circPREPL	miR-30d	MEF2D	0.22032	0.491399	0.286824	0.366058	0.0834968	0.796418
circPREPL	miR-30d	RB1	0.22032	0.491399	-0.054508	0.866389	0.693472	0.0123837
circPREPL	miR-30d	SCN7A	0.22032	0.491399	-0.183136	0.568869	0.705141	0.0104253
circPTGES3	miR-30d	COPS2	0.441638	0.150618	-0.0438857	0.892277	0.632742	0.0272318
circPTGES3	miR-30d	FKBP1A	0.441638	0.150618	0.0990602	0.759381	0.626509	0.0292675
circPTGES3	miR-30d	IFRD1	0.441638	0.150618	0.147878	0.646485	0.865532	0.000275067
circPTGES3	miR-30d	MEF2D	0.441638	0.150618	0.286824	0.366058	0.0892422	0.782696
circPTGES3	miR-30d	RB1	0.441638	0.150618	-0.054508	0.866389	0.600453	0.0389763
circPTGES3	miR-30d	SCN7A	0.441638	0.150618	-0.183136	0.568869	0.470767	0.122424
circ4082	miR-320	CHRNB1	-0.391163	0.208628	-0.066317	0.837751	0.606766	0.0364397
circ4082	miR-320	COPS2	-0.391163	0.208628	0.188	0.558464	0.680062	0.0149567
circ4082	miR-320	FKBP1A	-0.391163	0.208628	0.207107	0.518369	0.424551	0.168938
circ4082	miR-320	FOXN2	-0.391163	0.208628	0.036014	0.911525	0.737915	0.00614773
circ4082	miR-320	MYBPC1	-0.391163	0.208628	-0.203102	0.526668	0.877162	0.000178595
circ4082	miR-320	TPM3	-0.391163	0.208628	0.114269	0.723631	0.754823	0.00454388
circ4082	miR-320	TPM4	-0.391163	0.208628	0.272092	0.392246	0.581545	0.0473228
circ0470	miR-323	COPS2	-0.0605869	0.851627	-0.14375	0.655807	0.801705	0.00171242
circ0470	miR-323	FBXO40	-0.0605869	0.851627	-0.0978206	0.762315	0.368591	0.238409
circ0470	miR-323	FOXN2	-0.0605869	0.851627	-0.23408	0.464008	0.769915	0.00339987
circ0470	miR-323	SCN7A	-0.0605869	0.851627	-0.439583	0.152751	0.776768	0.00295955
circ0470	miR-323	TMOD1	-0.0605869	0.851627	0.0799127	0.805005	0.546537	0.0659651
circ0470	miR-335	CLCN1	-0.131453	0.683841	0.373275	0.232033	0.235721	0.46079
circ0470	miR-335	COPS2	-0.131453	0.683841	-0.269442	0.397055	0.801705	0.00171242
circ0470	miR-335	MEF2D	-0.131453	0.683841	0.496229	0.10082	-0.24318	0.446294
circ4082	miR-335	CLCN1	-0.597283	0.0402962	0.373275	0.232033	0.147001	0.648462
circ4082	miR-335	COPS2	-0.597283	0.0402962	-0.269442	0.397055	0.680062	0.0149567
circ4082	miR-335	MEF2D	-0.597283	0.0402962	0.496229	0.10082	-0.186679	0.561283
circATF7IP	miR-335	CLCN1	-0.114985	0.721959	0.373275	0.232033	-0.0616827	0.84897
circATF7IP	miR-335	COPS2	-0.114985	0.721959	-0.269442	0.397055	-0.427477	0.165706
circATF7IP	miR-335	MEF2D	-0.114985	0.721959	0.496229	0.10082	-0.0477941	0.882739
circ4082	miR-339	ACTN2	-0.242123	0.448336	0.124426	0.700028	0.829602	0.000843477
circ4082	miR-339	CLCN1	-0.242123	0.448336	0.403692	0.193126	0.147001	0.648462
circ4082	miR-339	FKBP1A	-0.242123	0.448336	0.192092	0.549772	0.424551	0.168938
circ4082	miR-339	MEF2D	-0.242123	0.448336	0.430959	0.161912	-0.186679	0.561283
circ4082	miR-339	TPM4	-0.242123	0.448336	0.166923	0.604097	0.581545	0.0473228
circEZH1	miR-339	ACTN2	0.469879	0.123228	0.124426	0.700028	0.591392	0.0428328
circEZH1	miR-339	CLCN1	0.469879	0.123228	0.403692	0.193126	0.529938	0.0763651
circEZH1	miR-339	FKBP1A	0.469879	0.123228	0.192092	0.549772	0.24863	0.435844
circEZH1	miR-339	MEF2D	0.469879	0.123228	0.430959	0.161912	0.331815	0.29203
circEZH1	miR-339	TPM4	0.469879	0.123228	0.166923	0.604097	0.291619	0.357739
circNCBP3	miR-339	ACTN2	-0.0220358	0.945806	0.124426	0.700028	0.805926	0.00154948
circNCBP3	miR-339	CLCN1	-0.0220358	0.945806	0.403692	0.193126	0.168351	0.600962
circNCBP3	miR-339	FKBP1A	-0.0220358	0.945806	0.192092	0.549772	0.418243	0.17604
circNCBP3	miR-339	MEF2D	-0.0220358	0.945806	0.430959	0.161912	-0.0841648	0.794819
circNCBP3	miR-339	TPM4	-0.0220358	0.945806	0.166923	0.604097	0.613436	0.0338899
circ4082	miR-339-5p	ACTN2	-0.242123	0.448336	0.124426	0.700028	0.829602	0.000843477
circ4082	miR-339-5p	CLCN1	-0.242123	0.448336	0.403692	0.193126	0.147001	0.648462
circ4082	miR-339-5p	FKBP1A	-0.242123	0.448336	0.192092	0.549772	0.424551	0.168938
circ4082	miR-339-5p	MEF2D	-0.242123	0.448336	0.430959	0.161912	-0.186679	0.561283
circ4082	miR-339-5p	TPM4	-0.242123	0.448336	0.166923	0.604097	0.581545	0.0473228
circEZH1	miR-339-5p	ACTN2	0.469879	0.123228	0.124426	0.700028	0.591392	0.0428328
circEZH1	miR-339-5p	CLCN1	0.469879	0.123228	0.403692	0.193126	0.529938	0.0763651
circEZH1	miR-339-5p	FKBP1A	0.469879	0.123228	0.192092	0.549772	0.24863	0.435844
circEZH1	miR-339-5p	MEF2D	0.469879	0.123228	0.430959	0.161912	0.331815	0.29203
circEZH1	miR-339-5p	TPM4	0.469879	0.123228	0.166923	0.604097	0.291619	0.357739
circNCBP3	miR-339-5p	ACTN2	-0.0220358	0.945806	0.124426	0.700028	0.805926	0.00154948
circNCBP3	miR-339-5p	CLCN1	-0.0220358	0.945806	0.403692	0.193126	0.168351	0.600962
circNCBP3	miR-339-5p	FKBP1A	-0.0220358	0.945806	0.192092	0.549772	0.418243	0.17604
circNCBP3	miR-339-5p	MEF2D	-0.0220358	0.945806	0.430959	0.161912	-0.0841648	0.794819
circNCBP3	miR-339-5p	TPM4	-0.0220358	0.945806	0.166923	0.604097	0.613436	0.0338899
circEZH1	miR-363	ATF3	0.235674	0.460881	-0.0965242	0.765386	-0.469924	0.123187
circEZH1	miR-363	FBXO40	0.235674	0.460881	-0.25249	0.428515	-0.135896	0.673667
circEZH1	miR-363	FOXN2	0.235674	0.460881	-0.27621	0.384831	0.297618	0.347471
circEZH1	miR-363	MEF2D	0.235674	0.460881	0.439933	0.152386	0.331815	0.29203
circEZH1	miR-363	TPM4	0.235674	0.460881	-0.399582	0.19813	0.291619	0.357739
circ4082	miR-370	FKBP1A	-0.576237	0.0498754	-0.0413046	0.898583	0.424551	0.168938
circ4082	miR-370	LEMD2	-0.576237	0.0498754	-0.166734	0.604511	0.77667	0.00296554
circ4082	miR-370	MEF2D	-0.576237	0.0498754	0.642742	0.0241823	-0.186679	0.561283
circCHD7	miR-370	FKBP1A	0.0237871	0.941506	-0.0413046	0.898583	0.75876	0.00422099
circCHD7	miR-370	LEMD2	0.0237871	0.941506	-0.166734	0.604511	0.888798	0.000110809
circCHD7	miR-370	MEF2D	0.0237871	0.941506	0.642742	0.0241823	-0.145247	0.652422
circMEF2C	miR-370	FKBP1A	0.172056	0.592855	-0.0413046	0.898583	0.487795	0.10767
circMEF2C	miR-370	LEMD2	0.172056	0.592855	-0.166734	0.604511	0.685968	0.0137793
circMEF2C	miR-370	MEF2D	0.172056	0.592855	0.642742	0.0241823	0.395749	0.202868
circKANSL1L_4	miR-376a-3p	COPS2	-0.175415	0.585543	-0.170113	0.5971	0.88649	0.000122305
circKANSL1L_4	miR-376a-3p	FOXN2	-0.175415	0.585543	-0.181473	0.572444	0.727431	0.00733587
circKANSL1L_4	miR-376a-3p	MEF2D	-0.175415	0.585543	0.423915	0.169646	-0.353645	0.259441
circEZH1	miR-382	COPS2	0.190772	0.55257	-0.0168865	0.958459	0.209734	0.512955
circFAM188A_2	miR-382	COPS2	-0.00173496	0.99573	-0.0168865	0.958459	0.568167	0.0539399
circGRIPAP1	miR-382	COPS2	-0.157674	0.624552	-0.0168865	0.958459	0.844031	0.000555993
circKANSL1L_5	miR-382	COPS2	0.0995304	0.758268	-0.0168865	0.958459	-0.289642	0.361156
circATF7IP	miR-382	COPS2	-0.0953256	0.768229	-0.0168865	0.958459	-0.427477	0.165706
circST7L	miR-382	COPS2	-0.123024	0.703271	-0.0168865	0.958459	0.400162	0.197419
circEZH1	miR-382	FBXO40	0.190772	0.55257	0.0197969	0.951306	-0.135896	0.673667
circFAM188A_2	miR-382	FBXO40	-0.00173496	0.99573	0.0197969	0.951306	-0.195457	0.542668
circGRIPAP1	miR-382	FBXO40	-0.157674	0.624552	0.0197969	0.951306	0.27962	0.378747
circKANSL1L_5	miR-382	FBXO40	0.0995304	0.758268	0.0197969	0.951306	0.276752	0.383861
circATF7IP	miR-382	FBXO40	-0.0953256	0.768229	0.0197969	0.951306	-0.0118237	0.970908
circST7L	miR-382	FBXO40	-0.123024	0.703271	0.0197969	0.951306	-0.216086	0.499972
circEZH1	miR-382	FOXN2	0.190772	0.55257	-0.117612	0.715837	0.297618	0.347471
circFAM188A_2	miR-382	FOXN2	-0.00173496	0.99573	-0.117612	0.715837	0.542831	0.0681971
circGRIPAP1	miR-382	FOXN2	-0.157674	0.624552	-0.117612	0.715837	0.872908	0.000210165
circKANSL1L_5	miR-382	FOXN2	0.0995304	0.758268	-0.117612	0.715837	-0.402406	0.194682
circATF7IP	miR-382	FOXN2	-0.0953256	0.768229	-0.117612	0.715837	-0.413608	0.181375
circST7L	miR-382	FOXN2	-0.123024	0.703271	-0.117612	0.715837	0.542587	0.0683457
circEZH1	miR-382	IFRD1	0.190772	0.55257	0.282899	0.372943	0.299387	0.344474
circFAM188A_2	miR-382	IFRD1	-0.00173496	0.99573	0.282899	0.372943	0.584896	0.0457593
circGRIPAP1	miR-382	IFRD1	-0.157674	0.624552	0.282899	0.372943	0.798462	0.00184629
circKANSL1L_5	miR-382	IFRD1	0.0995304	0.758268	0.282899	0.372943	-0.351057	0.263189
circATF7IP	miR-382	IFRD1	-0.0953256	0.768229	0.282899	0.372943	-0.248235	0.436598
circST7L	miR-382	IFRD1	-0.123024	0.703271	0.282899	0.372943	0.531753	0.0751771
circEZH1	miR-382	TPM3	0.190772	0.55257	-0.049987	0.877394	0.413537	0.181458
circFAM188A_2	miR-382	TPM3	-0.00173496	0.99573	-0.049987	0.877394	0.692244	0.0126045
circGRIPAP1	miR-382	TPM3	-0.157674	0.624552	-0.049987	0.877394	0.935841	7.6827e-06
circKANSL1L_5	miR-382	TPM3	0.0995304	0.758268	-0.049987	0.877394	-0.383116	0.218971
circATF7IP	miR-382	TPM3	-0.0953256	0.768229	-0.049987	0.877394	-0.385331	0.216094
circST7L	miR-382	TPM3	-0.123024	0.703271	-0.049987	0.877394	0.578782	0.0486396
circ0470	miR-411	FKBP1A	-0.131064	0.684733	-0.0514092	0.87393	0.563933	0.056162
circCHD7	miR-421-3p	ANKRD1	0.0233549	0.942567	-0.0115434	0.971598	0.487599	0.107832
circCHD7	miR-421-3p	CHRNB1	0.0233549	0.942567	0.0663617	0.837643	0.797637	0.0018816
circCHD7	miR-421-3p	FBXO40	0.0233549	0.942567	-0.345718	0.271018	0.314273	0.319807
circCHD7	miR-421-3p	FKBP1A	0.0233549	0.942567	0.00261879	0.993555	0.75876	0.00422099
circCHD7	miR-421-3p	FOXN2	0.0233549	0.942567	-0.389031	0.211338	0.858829	0.000346708
circCHD7	miR-421-3p	MEF2D	0.0233549	0.942567	0.646628	0.0230669	-0.145247	0.652422
circCHD7	miR-421-3p	RB1	0.0233549	0.942567	-0.383812	0.218064	0.856828	0.000370672
circKIAA2026	miR-421-3p	ANKRD1	0.0951678	0.768603	-0.0115434	0.971598	0.690613	0.0129023
circKIAA2026	miR-421-3p	CHRNB1	0.0951678	0.768603	0.0663617	0.837643	0.854639	0.00039835
circKIAA2026	miR-421-3p	FBXO40	0.0951678	0.768603	-0.345718	0.271018	-0.0447246	0.890229
circKIAA2026	miR-421-3p	FKBP1A	0.0951678	0.768603	0.00261879	0.993555	0.547693	0.0652799
circKIAA2026	miR-421-3p	FOXN2	0.0951678	0.768603	-0.389031	0.211338	0.663061	0.0187602
circKIAA2026	miR-421-3p	MEF2D	0.0951678	0.768603	0.646628	0.0230669	0.105379	0.744469
circKIAA2026	miR-421-3p	RB1	0.0951678	0.768603	-0.383812	0.218064	0.70485	0.0104712
circSAV1	miR-421-3p	ANKRD1	0.0671915	0.835637	-0.0115434	0.971598	0.62459	0.0299157
circSAV1	miR-421-3p	CHRNB1	0.0671915	0.835637	0.0663617	0.837643	0.735955	0.00635797
circSAV1	miR-421-3p	FBXO40	0.0671915	0.835637	-0.345718	0.271018	-0.244659	0.443447
circSAV1	miR-421-3p	FKBP1A	0.0671915	0.835637	0.00261879	0.993555	0.423166	0.170481
circSAV1	miR-421-3p	FOXN2	0.0671915	0.835637	-0.389031	0.211338	0.520478	0.0827677
circSAV1	miR-421-3p	MEF2D	0.0671915	0.835637	0.646628	0.0230669	0.149355	0.643162
circSAV1	miR-421-3p	RB1	0.0671915	0.835637	-0.383812	0.218064	0.608914	0.035604
circZNF292	miR-421-3p	ANKRD1	-0.138388	0.667983	-0.0115434	0.971598	0.622754	0.0305458
circZNF292	miR-421-3p	CHRNB1	-0.138388	0.667983	0.0663617	0.837643	0.77269	0.00321597
circZNF292	miR-421-3p	FBXO40	-0.138388	0.667983	-0.345718	0.271018	-0.178281	0.579331
circZNF292	miR-421-3p	FKBP1A	-0.138388	0.667983	0.00261879	0.993555	0.505307	0.0937803
circZNF292	miR-421-3p	FOXN2	-0.138388	0.667983	-0.389031	0.211338	0.557746	0.0595239
circZNF292	miR-421-3p	MEF2D	-0.138388	0.667983	0.646628	0.0230669	0.165602	0.607002
circZNF292	miR-421-3p	RB1	-0.138388	0.667983	-0.383812	0.218064	0.624151	0.0300654
circATF7IP	miR-421-3p	ANKRD1	0.00313297	0.99229	-0.0115434	0.971598	-0.0194423	0.952178
circATF7IP	miR-421-3p	CHRNB1	0.00313297	0.99229	0.0663617	0.837643	-0.225164	0.481674
circATF7IP	miR-421-3p	FBXO40	0.00313297	0.99229	-0.345718	0.271018	-0.0118237	0.970908
circATF7IP	miR-421-3p	FKBP1A	0.00313297	0.99229	0.00261879	0.993555	-0.0494068	0.878808
circATF7IP	miR-421-3p	FOXN2	0.00313297	0.99229	-0.389031	0.211338	-0.413608	0.181375
circATF7IP	miR-421-3p	MEF2D	0.00313297	0.99229	0.646628	0.0230669	-0.0477941	0.882739
circATF7IP	miR-421-3p	RB1	0.00313297	0.99229	-0.383812	0.218064	-0.434259	0.158366
circ3514	miR-423-5p	CLCN1	0.236421	0.45942	-0.105004	0.745354	0.363851	0.244965
circ3514	miR-423-5p	MAFF	0.236421	0.45942	0.31224	0.323118	0.56247	0.0569449
circ3514	miR-423-5p	MEF2D	0.236421	0.45942	0.435672	0.156863	0.316857	0.315628
circ3514	miR-423-5p	TPM4	0.236421	0.45942	-0.235189	0.461831	0.462827	0.129735
circKANSL1L_5	miR-423-5p	CLCN1	-0.231322	0.46944	-0.105004	0.745354	-0.340095	0.27941
circKANSL1L_5	miR-423-5p	MAFF	-0.231322	0.46944	0.31224	0.323118	-0.509536	0.0906172
circKANSL1L_5	miR-423-5p	MEF2D	-0.231322	0.46944	0.435672	0.156863	-0.266337	0.402727
circKANSL1L_5	miR-423-5p	TPM4	-0.231322	0.46944	-0.235189	0.461831	-0.169439	0.598575
circPLCE1	miR-423-5p	CLCN1	0.37182	0.234001	-0.105004	0.745354	0.29383	0.353936
circPLCE1	miR-423-5p	MAFF	0.37182	0.234001	0.31224	0.323118	0.310533	0.325911
circPLCE1	miR-423-5p	MEF2D	0.37182	0.234001	0.435672	0.156863	0.363286	0.245754
circPLCE1	miR-423-5p	TPM4	0.37182	0.234001	-0.235189	0.461831	0.236509	0.459247
circFAM179B	miR-424-3p	PLAGL1	0.084853	0.793174	-0.0457731	0.887669	0.607609	0.03611
circFAM179B	miR-424-3p	SCN7A	0.084853	0.793174	-0.343889	0.273732	0.579201	0.0484384
circPREPL	miR-424-3p	PLAGL1	0.104891	0.745619	-0.0457731	0.887669	0.652023	0.0215809
circPREPL	miR-424-3p	SCN7A	0.104891	0.745619	-0.343889	0.273732	0.705141	0.0104253
circEZH1	miR-432-5p	COPS2	0.310128	0.326575	-0.398544	0.199406	0.209734	0.512955
circEZH1	miR-432-5p	FKBP1A	0.310128	0.326575	-0.0972204	0.763736	0.24863	0.435844
circEZH1	miR-432-5p	MEF2D	0.310128	0.326575	0.726855	0.00740576	0.331815	0.29203
circKANSL1L_5	miR-432-5p	COPS2	-0.0847922	0.793319	-0.398544	0.199406	-0.289642	0.361156
circKANSL1L_5	miR-432-5p	FKBP1A	-0.0847922	0.793319	-0.0972204	0.763736	-0.154549	0.631521
circKANSL1L_5	miR-432-5p	MEF2D	-0.0847922	0.793319	0.726855	0.00740576	-0.266337	0.402727
circMEF2C	miR-432-5p	COPS2	0.295243	0.351517	-0.398544	0.199406	0.353684	0.259384
circMEF2C	miR-432-5p	FKBP1A	0.295243	0.351517	-0.0972204	0.763736	0.487795	0.10767
circMEF2C	miR-432-5p	MEF2D	0.295243	0.351517	0.726855	0.00740576	0.395749	0.202868
circ4082	miR-4334-3p	ACTN2	-0.190068	0.554065	0.143659	0.656014	0.829602	0.000843477
circ4082	miR-4334-3p	CLCN1	-0.190068	0.554065	0.31423	0.319878	0.147001	0.648462
circ4082	miR-4334-3p	FKBP1A	-0.190068	0.554065	0.160955	0.617268	0.424551	0.168938
circ4082	miR-4334-3p	MEF2D	-0.190068	0.554065	0.430253	0.162676	-0.186679	0.561283
circ4082	miR-4334-3p	TPM4	-0.190068	0.554065	0.180186	0.575217	0.581545	0.0473228
circEZH1	miR-4334-3p	ACTN2	0.431344	0.161495	0.143659	0.656014	0.591392	0.0428328
circEZH1	miR-4334-3p	CLCN1	0.431344	0.161495	0.31423	0.319878	0.529938	0.0763651
circEZH1	miR-4334-3p	FKBP1A	0.431344	0.161495	0.160955	0.617268	0.24863	0.435844
circEZH1	miR-4334-3p	MEF2D	0.431344	0.161495	0.430253	0.162676	0.331815	0.29203
circEZH1	miR-4334-3p	TPM4	0.431344	0.161495	0.180186	0.575217	0.291619	0.357739
circNCBP3	miR-4334-3p	ACTN2	0.0580082	0.857884	0.143659	0.656014	0.805926	0.00154948
circNCBP3	miR-4334-3p	CLCN1	0.0580082	0.857884	0.31423	0.319878	0.168351	0.600962
circNCBP3	miR-4334-3p	FKBP1A	0.0580082	0.857884	0.160955	0.617268	0.418243	0.17604
circNCBP3	miR-4334-3p	MEF2D	0.0580082	0.857884	0.430253	0.162676	-0.0841648	0.794819
circNCBP3	miR-4334-3p	TPM4	0.0580082	0.857884	0.180186	0.575217	0.613436	0.0338899
circ4082	miR-450c-3p	CHRNB1	-0.510325	0.0900346	0.0741086	0.818952	0.606766	0.0364397
circ4082	miR-450c-3p	CLCN1	-0.510325	0.0900346	0.490967	0.105059	0.147001	0.648462
circ4082	miR-450c-3p	FKBP1A	-0.510325	0.0900346	0.0600479	0.852934	0.424551	0.168938
circ4082	miR-450c-3p	FOXN2	-0.510325	0.0900346	-0.153594	0.633654	0.737915	0.00614773
circ4082	miR-450c-3p	MEF2D	-0.510325	0.0900346	0.361053	0.248885	-0.186679	0.561283
circ4082	miR-450c-3p	MYBPC1	-0.510325	0.0900346	-0.21376	0.504711	0.877162	0.000178595
circ4082	miR-450c-3p	TPM3	-0.510325	0.0900346	-0.0668639	0.836429	0.754823	0.00454388
circMSH3	miR-450c-3p	CHRNB1	0.209358	0.513729	0.0741086	0.818952	0.662425	0.0189149
circMSH3	miR-450c-3p	CLCN1	0.209358	0.513729	0.490967	0.105059	0.506847	0.0926202
circMSH3	miR-450c-3p	FKBP1A	0.209358	0.513729	0.0600479	0.852934	0.476663	0.117174
circMSH3	miR-450c-3p	FOXN2	0.209358	0.513729	-0.153594	0.633654	0.793958	0.00204531
circMSH3	miR-450c-3p	MEF2D	0.209358	0.513729	0.361053	0.248885	-0.106349	0.742189
circMSH3	miR-450c-3p	MYBPC1	0.209358	0.513729	-0.21376	0.504711	0.724987	0.00763591
circMSH3	miR-450c-3p	TPM3	0.209358	0.513729	-0.0668639	0.836429	0.735228	0.00643731
circPREPL	miR-450c-3p	CHRNB1	0.200956	0.53114	0.0741086	0.818952	0.659421	0.0196586
circPREPL	miR-450c-3p	CLCN1	0.200956	0.53114	0.490967	0.105059	0.374615	0.230227
circPREPL	miR-450c-3p	FKBP1A	0.200956	0.53114	0.0600479	0.852934	0.415711	0.178943
circPREPL	miR-450c-3p	FOXN2	0.200956	0.53114	-0.153594	0.633654	0.693058	0.0124579
circPREPL	miR-450c-3p	MEF2D	0.200956	0.53114	0.361053	0.248885	0.0834968	0.796418
circPREPL	miR-450c-3p	MYBPC1	0.200956	0.53114	-0.21376	0.504711	0.738437	0.00609264
circPREPL	miR-450c-3p	TPM3	0.200956	0.53114	-0.0668639	0.836429	0.693415	0.0123939
circMEF2C	miR-486	ATF3	0.155865	0.628582	-0.214006	0.504208	-0.434248	0.158378
circMEF2C	miR-486	FBXO40	0.155865	0.628582	0.0492894	0.879094	-0.218908	0.49425
circMEF2C	miR-486	TMOD1	0.155865	0.628582	-0.146935	0.648612	0.515529	0.0862584
circPUM2	miR-486	ATF3	0.151656	0.637995	-0.214006	0.504208	-0.501527	0.0966705
circPUM2	miR-486	FBXO40	0.151656	0.637995	0.0492894	0.879094	-0.258221	0.417745
circPUM2	miR-486	TMOD1	0.151656	0.637995	-0.146935	0.648612	0.482081	0.112482
circATF7IP	miR-486	ATF3	-0.204488	0.523791	-0.214006	0.504208	0.593238	0.0420263
circATF7IP	miR-486	FBXO40	-0.204488	0.523791	0.0492894	0.879094	-0.0118237	0.970908
circATF7IP	miR-486	TMOD1	-0.204488	0.523791	-0.146935	0.648612	-0.152026	0.637166
circKANSL1L_4	miR-487b	ACTN2	-0.12195	0.705761	-0.218591	0.494893	0.814454	0.00125678
circKANSL1L_4	miR-487b	FBXO40	-0.12195	0.705761	-0.149955	0.641813	0.430623	0.162274
circKANSL1L_4	miR-487b	FKBP1A	-0.12195	0.705761	0.0462373	0.886537	0.866963	0.000261395
circKANSL1L_4	miR-487b	MEF2D	-0.12195	0.705761	0.414382	0.180478	-0.353645	0.259441
circMYBPC2	miR-493-3p	FKBP1A	0.135851	0.67377	0.0455778	0.888146	0.246887	0.439173
circATF7IP	miR-493-3p	FKBP1A	-0.00312808	0.992302	0.0455778	0.888146	-0.0494068	0.878808
circMYBPC2	miR-493-3p	MEF2D	0.135851	0.67377	0.555408	0.0608297	-0.506379	0.092972
circATF7IP	miR-493-3p	MEF2D	-0.00312808	0.992302	0.555408	0.0608297	-0.0477941	0.882739
circMYBPC2	miR-493-3p	TPM3	0.135851	0.67377	-0.133857	0.67833	-0.085535	0.791544
circATF7IP	miR-493-3p	TPM3	-0.00312808	0.992302	-0.133857	0.67833	-0.385331	0.216094
circKANSL1L_4	miR-493-5p	FKBP1A	-0.0571842	0.859885	0.0455778	0.888146	0.866963	0.000261395
circKIAA2026	miR-493-5p	FKBP1A	0.341554	0.277219	0.0455778	0.888146	0.547693	0.0652799
circKANSL1L_4	miR-493-5p	MEF2D	-0.0571842	0.859885	0.555408	0.0608297	-0.353645	0.259441
circKIAA2026	miR-493-5p	MEF2D	0.341554	0.277219	0.555408	0.0608297	0.105379	0.744469
circKANSL1L_4	miR-493-5p	TPM3	-0.0571842	0.859885	-0.133857	0.67833	0.904946	5.20035e-05
circKIAA2026	miR-493-5p	TPM3	0.341554	0.277219	-0.133857	0.67833	0.644164	0.0237697
circ3514	miR-500	ACTN2	-0.139156	0.666234	-0.15409	0.632545	0.825302	0.000948135
circ3514	miR-500	COPS2	-0.139156	0.666234	0.243089	0.446471	0.461568	0.13092
circ3514	miR-500	FBXO40	-0.139156	0.666234	-0.0345932	0.915004	-0.240136	0.452183
circ3514	miR-500	TMOD1	-0.139156	0.666234	0.0536309	0.868522	0.345399	0.27149
circFAM179B	miR-504	ACTN2	-0.00827871	0.979628	-0.193854	0.546048	0.807721	0.00148394
circFAM179B	miR-504	FKBP1A	-0.00827871	0.979628	-0.0384257	0.905623	0.698434	0.0115203
circFAM179B	miR-504	MAFF	-0.00827871	0.979628	0.376719	0.227409	0.516662	0.0854503
circFAM179B	miR-504	TPM4	-0.00827871	0.979628	-0.231397	0.469291	0.625263	0.0296874
circTRMT11	miR-504	ACTN2	-0.10006	0.757015	-0.193854	0.546048	0.815325	0.00122948
circTRMT11	miR-504	FKBP1A	-0.10006	0.757015	-0.0384257	0.905623	0.633823	0.0268892
circTRMT11	miR-504	MAFF	-0.10006	0.757015	0.376719	0.227409	0.160835	0.617532
circTRMT11	miR-504	TPM4	-0.10006	0.757015	-0.231397	0.469291	0.649283	0.0223266
circST7L	miR-532-5p	COPS2	0.0616019	0.849166	-0.309846	0.327039	0.400162	0.197419
circST7L	miR-532-5p	FBXO40	0.0616019	0.849166	-0.323098	0.305657	-0.216086	0.499972
circ4082	miR-542-3p	ACTN2	-0.582161	0.0470324	-0.321683	0.307903	0.829602	0.000843477
circ4082	miR-542-3p	COPS2	-0.582161	0.0470324	-0.167011	0.603903	0.680062	0.0149567
circ4082	miR-542-3p	FKBP1A	-0.582161	0.0470324	-0.0804926	0.803614	0.424551	0.168938
circ4082	miR-542-3p	LMOD2	-0.582161	0.0470324	-0.388407	0.212136	0.84281	0.000576861
circKANSL1L_5	miR-7142-3p	ACTN2	0.195453	0.542676	0.0846599	0.793636	-0.597997	0.039996
circKANSL1L_5	miR-7142-3p	FBXO40	0.195453	0.542676	0.282887	0.372966	0.276752	0.383861
circKANSL1L_5	miR-7142-3p	FKBP1A	0.195453	0.542676	-0.0751211	0.816516	-0.154549	0.631521
circMSH3	miR-7142-3p	ACTN2	-0.184609	0.565709	0.0846599	0.793636	0.709671	0.00973092
circMSH3	miR-7142-3p	FBXO40	-0.184609	0.565709	0.282887	0.372966	0.258542	0.417146
circMSH3	miR-7142-3p	FKBP1A	-0.184609	0.565709	-0.0751211	0.816516	0.476663	0.117174
circKANSL1L_4	miR-885-5p	COPS2	0.450474	0.141665	0.407275	0.188827	0.88649	0.000122305
circKIAA2026	miR-885-5p	COPS2	0.0148921	0.963362	0.407275	0.188827	0.689733	0.0130653
circPREPL	miR-885-5p	COPS2	0.198745	0.535761	0.407275	0.188827	0.696664	0.011823
circKANSL1L_4	miR-885-5p	FKBP1A	0.450474	0.141665	0.279921	0.378211	0.866963	0.000261395
circKIAA2026	miR-885-5p	FKBP1A	0.0148921	0.963362	0.279921	0.378211	0.547693	0.0652799
circPREPL	miR-885-5p	FKBP1A	0.198745	0.535761	0.279921	0.378211	0.415711	0.178943

## Sheet: J
CircRNA→miRNA→mRNA networks identified by competing to bind with shared miRNAs between LT90D and LW90D samples
circRNA	miRNA	gene	circRNA-miR		circRNA-gene		circRNA-gene
			R	P	R	P	R	P
circNDFIP2	let-7i	MEF2D	0.226634	0.47874	0.272021	0.392374	-0.310084	0.326648
circKIAA2026	miR-129a-5p	ANKRD1	-0.680364	0.0148946	-0.308836	0.328702	0.690613	0.0129023
circKIAA2026	miR-129a-5p	COPS2	-0.680364	0.0148946	-0.382882	0.219276	0.689733	0.0130653
circKIAA2026	miR-129a-5p	SIX1	-0.680364	0.0148946	-0.478294	0.115748	0.691943	0.0126592
circPHTF1	miR-129a-5p	ANKRD1	-0.558545	0.0590822	-0.308836	0.328702	-0.0429922	0.894459
circPHTF1	miR-129a-5p	COPS2	-0.558545	0.0590822	-0.382882	0.219276	-0.105897	0.743251
circPHTF1	miR-129a-5p	SIX1	-0.558545	0.0590822	-0.478294	0.115748	-0.12315	0.70298
circKIAA2026	miR-129b	ANKRD1	-0.680834	0.0147986	-0.308802	0.328757	0.690613	0.0129023
circKIAA2026	miR-129b	COPS2	-0.680834	0.0147986	-0.383928	0.217913	0.689733	0.0130653
circKIAA2026	miR-129b	SIX1	-0.680834	0.0147986	-0.478711	0.115385	0.691943	0.0126592
circPHTF1	miR-129b	ANKRD1	-0.559122	0.0587645	-0.308802	0.328757	-0.0429922	0.894459
circPHTF1	miR-129b	COPS2	-0.559122	0.0587645	-0.383928	0.217913	-0.105897	0.743251
circPHTF1	miR-129b	SIX1	-0.559122	0.0587645	-0.478711	0.115385	-0.12315	0.70298
circPHKB	miR-16	ATF3	-0.154739	0.631095	-0.199411	0.534366	0.221751	0.488518
circPHKB	miR-16	COPS2	-0.154739	0.631095	0.614015	0.0336748	0.427313	0.165886
circPHKB	miR-16	MAPK14	-0.154739	0.631095	0.228117	0.47579	0.688564	0.0132838
circPHKB	miR-16	MEOX2	-0.154739	0.631095	0.725599	0.00755996	0.364508	0.244051
circPHKB	miR-16	SIX1	-0.154739	0.631095	0.603789	0.0376207	0.091612	0.777053
circKANSL1L_3	miR-21	MEF2C	0.0590253	0.855415	-0.410165	0.185404	0.336239	0.285247
circKANSL1L_2	miR-21	MEF2C	0.30107	0.341636	-0.410165	0.185404	0.239188	0.454025
circKANSL1L	miR-21	MEF2C	0.233931	0.464299	-0.410165	0.185404	0.292127	0.356862
circDEK	miR-21	MEF2C	-0.379703	0.223449	-0.410165	0.185404	0.839671	0.000633272
