# Supplementary material for: Identification of CircRNA-Associated ceRNA Networks Using Longissimus Thoracis of Pigs of Different Breeds and Growth Stages
Source: Research Square preprint supplement (doi:10.21203/rs.3.rs-852221/v1), 2021-11-30
Supplement: Supplementary file 8 [file de5a061959b9d619e9834377.xlsx]

## Sheet: A
Sequencing quality of raw data in each library
Type	LT1D_1	LT1D_2	LT1D_3	LT90D_1	LT90D_2	LT90D_3	LW1D_1	LW1D_2	LW1D_3	LW90D_1	LW90D_2	LW90D_3
Total raw reads	124722298	124846624	124795930	124429092	124423154	124432000	124431340	124432710	122165182	124641264	124549710	126975376
Valid reads	122464720	122003574	122885820	123427908	123264866	123587692	123417470	123362594	121414692	122194414	122675592	123586998
Total low quality reads	2257578	2843050	1910110	1001184	1158288	844308	1013870	1070116	750490	2446850	1874118	3388378
Clean reads Q20 (%)	97.82	97.85	97.95	98.54	98.69	98.58	98.45	98.55	98.6	97.57	97.78	98.18
Clean reads Q30 (%)	93.19	93.23	93.46	95.89	96.38	96.15	95.86	96.16	96.23	93.81	94.22	95.09
Total_mapped_reads (%)	88.75	90.23	80.97	81.58	76.91	75.62	83.68	83.82	83.79	90.38	89.37	88.25
Unique_mapped_reads (%)	80.55	81.12	67.18	70.42	66.04	64.64	70.97	70.44	70.7	83.71	82.22	78.17
Reads_mapped_in_paired (%)	82.06	83.1	75.74	75.8	71.63	71.02	79.66	79.69	79.71	83.48	83.78	80.91
Note: Low-quality sequence included adatper reads, and reads contained more than 5% N and reads contained more than 20% bases that Q value ≤ 10.

## Sheet: B
Transcript candidates identified in all libraries
Tracking ID	Classcode	Gene ID	Gene name	Exon count	Chr	Start	End	Strand
TCONS_00000001	class_code"j"	XLOC_000001	DLL1	12	1	280401	290300	+
TCONS_00000002	class_code"="	XLOC_000001	DLL1	12	1	280457	290229	+
TCONS_00000003	class_code"u"	XLOC_000002		3	1	311656	322007	+
TCONS_00000004	class_code"u"	XLOC_000002		2	1	311969	316450	+
TCONS_00000005	class_code"u"	XLOC_000002		1	1	317581	318627	+
TCONS_00000006	class_code"="	XLOC_000003	CH242-271M12.1	1	1	492911	493356	+
TCONS_00000007	class_code"u"	XLOC_000004		1	1	642247	646853	+
TCONS_00000008	class_code"u"	XLOC_000004		2	1	642247	647253	+
TCONS_00000009	class_code"="	XLOC_000005	ENSSSCG00000004009	2	1	927951	930239	+
TCONS_00000010	class_code"="	XLOC_000006	ENSSSCG00000030155	12	1	935011	955845	+
TCONS_00000011	class_code"="	XLOC_000007	ENSSSCG00000025112	4	1	955869	970530	+
TCONS_00000012	class_code"j"	XLOC_000008	ENSSSCG00000004008	8	1	975387	994923	+
TCONS_00000013	class_code"j"	XLOC_000008	ENSSSCG00000004008	9	1	975387	994923	+
TCONS_00000014	class_code"j"	XLOC_000008	ENSSSCG00000004008	9	1	978638	994923	+
TCONS_00000015	class_code"j"	XLOC_000008	ENSSSCG00000004008	9	1	979162	994923	+
TCONS_00000016	class_code"j"	XLOC_000008	ENSSSCG00000004008	8	1	980113	994923	+
TCONS_00000017	class_code"j"	XLOC_000008	ENSSSCG00000004008	13	1	980113	1187495	+
TCONS_00000018	class_code"j"	XLOC_000008	ENSSSCG00000004008	8	1	981531	996377	+
TCONS_00000019	class_code"="	XLOC_000008	ENSSSCG00000004008	7	1	987440	1175801	+
TCONS_00000020	class_code"="	XLOC_000009	ENSSSCG00000021794	7	1	1150623	1187495	+
TCONS_00000021	class_code"j"	XLOC_000008	ENSSSCG00000004008	7	1	1150756	1177832	+
TCONS_00000022	class_code"j"	XLOC_000008	ENSSSCG00000004008	6	1	1166292	1187495	+
TCONS_00000023	class_code"j"	XLOC_000008	ENSSSCG00000004008	2	1	1130147	1132842	+
TCONS_00000024	class_code"="	XLOC_000010	ENSSSCG00000018614	1	1	1952603	1952690	+
TCONS_00000025	class_code"="	XLOC_000011	ENSSSCG00000027112	3	1	1979287	1987260	+
TCONS_00000026	class_code"="	XLOC_000012	DACT2	5	1	2447571	2457750	+
TCONS_00000027	class_code"="	XLOC_000013	FRMD1	12	1	2657896	2672308	+
TCONS_00000028	class_code"="	XLOC_000013	FRMD1	10	1	2664013	2672308	+
TCONS_00000029	class_code"="	XLOC_000014	ENSSSCG00000027404	8	1	3101176	3124301	+
TCONS_00000030	class_code"j"	XLOC_000014	ENSSSCG00000027404	7	1	3114697	3124301	+
TCONS_00000031	class_code"="	XLOC_000015	ENSSSCG00000004024	11	1	3289606	3307713	+
TCONS_00000032	class_code"j"	XLOC_000015	ENSSSCG00000004024	9	1	3289732	3307713	+
TCONS_00000033	class_code"="	XLOC_000015	ENSSSCG00000004024	11	1	3289750	3306795	+
TCONS_00000034	class_code"j"	XLOC_000016	RPS6KA2	22	1	3460846	3662515	+
TCONS_00000035	class_code"j"	XLOC_000016	RPS6KA2	21	1	3460849	3662515	+
TCONS_00000036	class_code"j"	XLOC_000016	RPS6KA2	18	1	3462384	3654099	+
TCONS_00000037	class_code"="	XLOC_000016	RPS6KA2	21	1	3575168	3662188	+
TCONS_00000038	class_code"j"	XLOC_000016	RPS6KA2	21	1	3575168	3662515	+
TCONS_00000039	class_code"j"	XLOC_000016	RPS6KA2	18	1	3596878	3662515	+
TCONS_00000040	class_code"u"	XLOC_000017		4	1	3680859	3692565	+
TCONS_00000041	class_code"u"	XLOC_000017		4	1	3680982	3692565	+
TCONS_00000042	class_code"u"	XLOC_000017		5	1	3680995	3692565	+
TCONS_00000043	class_code"u"	XLOC_000017		3	1	3681100	3692565	+
TCONS_00000044	class_code"u"	XLOC_000017		4	1	3681105	3692565	+
TCONS_00000045	class_code"j"	XLOC_000018	SFT2D1	8	1	3716400	3734041	+
TCONS_00000046	class_code"="	XLOC_000018	SFT2D1	8	1	3716400	3734041	+
TCONS_00000047	class_code"j"	XLOC_000018	SFT2D1	8	1	3716886	3734041	+
TCONS_00000048	class_code"="	XLOC_000019	PRR18	4	1	3739373	3741687	+
TCONS_00000049	class_code"="	XLOC_000020	U6	1	1	4256579	4256679	+
TCONS_00000050	class_code"j"	XLOC_000021	PDE10A	18	1	4311146	4727812	+
TCONS_00000051	class_code"j"	XLOC_000021	PDE10A	21	1	4311146	4743078	+
TCONS_00000052	class_code"j"	XLOC_000021	PDE10A	19	1	4311146	4743078	+
TCONS_00000053	class_code"u"	XLOC_000021		1	1	4311538	4311964	+
TCONS_00000054	class_code"="	XLOC_000021	ENSSSCG00000029213	2	1	4425763	4427710	+
TCONS_00000055	class_code"j"	XLOC_000021	PDE10A	20	1	4619433	4743078	+
TCONS_00000056	class_code"="	XLOC_000021	PDE10A	19	1	4635846	4742048	+
TCONS_00000057	class_code"="	XLOC_000021	PDE10A	19	1	4635846	4743078	+
TCONS_00000058	class_code"="	XLOC_000022	C6orf118	9	1	4758550	4776214	+
TCONS_00000059	class_code"u"	XLOC_000023		2	1	6590657	6593238	+
TCONS_00000060	class_code"u"	XLOC_000023		2	1	6590940	6592410	+
TCONS_00000061	class_code"j"	XLOC_000024	ENSSSCG00000004032	7	1	6931158	7812866	+
TCONS_00000062	class_code"j"	XLOC_000024	ENSSSCG00000004032	12	1	6931158	8262868	+
TCONS_00000063	class_code"j"	XLOC_000024	ENSSSCG00000004032	12	1	6931158	8262868	+
TCONS_00000064	class_code"u"	XLOC_000024		1	1	6931160	6931976	+
TCONS_00000065	class_code"j"	XLOC_000024	ENSSSCG00000004032	4	1	6931160	7371465	+
TCONS_00000066	class_code"="	XLOC_000024	ENSSSCG00000004032	6	1	7197034	7812493	+
TCONS_00000067	class_code"j"	XLOC_000024	ENSSSCG00000004032	11	1	7411854	8262868	+
TCONS_00000068	class_code"="	XLOC_000024	ENSSSCG00000026205	5	1	8042044	8262315	+
TCONS_00000069	class_code"j"	XLOC_000025	ENSSSCG00000004034	11	1	8304062	8326042	+
TCONS_00000070	class_code"j"	XLOC_000025	ENSSSCG00000004034	7	1	8304083	8316252	+
TCONS_00000071	class_code"j"	XLOC_000025	ENSSSCG00000004034	12	1	8304083	8326042	+
TCONS_00000072	class_code"j"	XLOC_000025	ENSSSCG00000004034	10	1	8304328	8326042	+
TCONS_00000073	class_code"j"	XLOC_000025	ENSSSCG00000004034	11	1	8304328	8326042	+
TCONS_00000074	class_code"="	XLOC_000025	ENSSSCG00000004034	8	1	8311642	8322831	+
TCONS_00000075	class_code"="	XLOC_000025	ENSSSCG00000004034	8	1	8311760	8323272	+
TCONS_00000076	class_code"="	XLOC_000026	PLG	19	1	8739980	8787582	+
TCONS_00000077	class_code"j"	XLOC_000026	PLG	18	1	8739980	8788097	+
TCONS_00000078	class_code"="	XLOC_000027	SNORA18	1	1	8908399	8908526	+
TCONS_00000079	class_code"="	XLOC_000028	ENSSSCG00000026300	4	1	8948029	8951929	+
TCONS_00000080	class_code"="	XLOC_000029	ENSSSCG00000022084	5	1	8952880	8963981	+
TCONS_00000081	class_code"="	XLOC_000030	ENSSSCG00000004042	11	1	9023233	9039694	+
TCONS_00000082	class_code"="	XLOC_000031	ENSSSCG00000004043	7	1	9093102	9101655	+
TCONS_00000083	class_code"="	XLOC_000032	ENSSSCG00000029477	6	1	9107113	9122294	+
TCONS_00000084	class_code"="	XLOC_000033	TCP1	12	1	9388926	9401819	+
TCONS_00000085	class_code"j"	XLOC_000033	TCP1	7	1	9389097	9396417	+
TCONS_00000086	class_code"="	XLOC_000033	TCP1	12	1	9389097	9400894	+
TCONS_00000087	class_code"j"	XLOC_000033	TCP1	3	1	9389097	9401819	+
TCONS_00000088	class_code"="	XLOC_000033	SNORA29	1	1	9392133	9392273	+
TCONS_00000089	class_code"j"	XLOC_000033	TCP1	8	1	9392148	9401819	+
TCONS_00000090	class_code"="	XLOC_000033	SNORA20	1	1	9397982	9398115	+
TCONS_00000091	class_code"="	XLOC_000034	SOD2	5	1	9475308	9487684	+
TCONS_00000092	class_code"="	XLOC_000034	SOD2	4	1	9475308	9487720	+
TCONS_00000093	class_code"="	XLOC_000034	SOD2	4	1	9475308	9487720	+
TCONS_00000094	class_code"="	XLOC_000034	SOD2	4	1	9475620	9485188	+
TCONS_00000095	class_code"="	XLOC_000034	SOD2	4	1	9475620	9485216	+
TCONS_00000096	class_code"="	XLOC_000035	TAGAP	10	1	10042141	10052624	+
TCONS_00000097	class_code"="	XLOC_000036	RPS15A	2	1	10057397	10059792	+
TCONS_00000098	class_code"="	XLOC_000037	RSPH3	8	1	10077339	10149319	+
TCONS_00000099	class_code"j"	XLOC_000037	RSPH3	5	1	10142533	10149855	+
TCONS_00000100	class_code"j"	XLOC_000038	ENSSSCG00000024876	11	1	10372024	10384973	+
TCONS_00000101	class_code"="	XLOC_000038	ENSSSCG00000024876	6	1	10372367	10377224	+
TCONS_00000102	class_code"u"	XLOC_000038		5	1	10377586	10384973	+
TCONS_00000103	class_code"u"	XLOC_000038		5	1	10379323	10384973	+
TCONS_00000104	class_code"u"	XLOC_000038		2	1	10381460	10384973	+
TCONS_00000105	class_code"="	XLOC_000039	ENSSSCG00000024378	6	1	10401160	10416272	+
TCONS_00000106	class_code"="	XLOC_000040	ENSSSCG00000004058	7	1	10423017	10432335	+
TCONS_00000107	class_code"="	XLOC_000041	ENSSSCG00000004059	2	1	10508258	10510504	+
TCONS_00000108	class_code"u"	XLOC_000042		5	1	10571370	10581724	+
TCONS_00000109	class_code"u"	XLOC_000042		5	1	10571370	10581724	+
TCONS_00000110	class_code"u"	XLOC_000042		4	1	10572105	10581724	+
TCONS_00000111	class_code"="	XLOC_000043	ENSSSCG00000029686	2	1	10660097	10662609	+
TCONS_00000112	class_code"u"	XLOC_000044		1	1	10670666	10676771	+
TCONS_00000113	class_code"u"	XLOC_000044		2	1	10670666	10677737	+
TCONS_00000114	class_code"j"	XLOC_000045	ENSSSCG00000012314	10	1	10907461	10950166	+
TCONS_00000115	class_code"j"	XLOC_000045	ENSSSCG00000012314	13	1	10907461	10966994	+
TCONS_00000116	class_code"="	XLOC_000045	ENSSSCG00000012314	17	1	10907461	10971380	+
TCONS_00000117	class_code"j"	XLOC_000045	ENSSSCG00000012314	16	1	10907461	10974430	+
TCONS_00000118	class_code"j"	XLOC_000045	ENSSSCG00000012314	16	1	10907461	10974430	+
TCONS_00000119	class_code"j"	XLOC_000045	ENSSSCG00000012314	17	1	10907461	10974430	+
TCONS_00000120	class_code"j"	XLOC_000045	ENSSSCG00000012314	15	1	10907461	10974430	+
TCONS_00000121	class_code"="	XLOC_000046	ENSSSCG00000004063	4	1	11703719	11756311	+
TCONS_00000122	class_code"j"	XLOC_000047	ENSSSCG00000004064	12	1	11840695	11894371	+
TCONS_00000123	class_code"j"	XLOC_000047	ENSSSCG00000004064	13	1	11840695	11894371	+
TCONS_00000124	class_code"j"	XLOC_000047	ENSSSCG00000004064	12	1	11840712	11894371	+
TCONS_00000125	class_code"="	XLOC_000047	ENSSSCG00000004064	12	1	11849146	11894228	+
TCONS_00000126	class_code"j"	XLOC_000047	ENSSSCG00000004064	12	1	11851805	11894371	+
TCONS_00000127	class_code"j"	XLOC_000047	ENSSSCG00000004064	11	1	11852272	11894371	+
TCONS_00000128	class_code"j"	XLOC_000047	ENSSSCG00000004064	3	1	11883035	11894371	+
TCONS_00000129	class_code"u"	XLOC_000048		2	1	12012506	12017267	+
TCONS_00000130	class_code"u"	XLOC_000049		2	1	12075674	12241029	+
TCONS_00000131	class_code"u"	XLOC_000049		3	1	12075713	12241029	+
TCONS_00000132	class_code"u"	XLOC_000049		3	1	12075713	12248730	+
TCONS_00000133	class_code"u"	XLOC_000049		2	1	12093968	12241029	+
TCONS_00000134	class_code"u"	XLOC_000049		2	1	12201669	12241029	+
TCONS_00000135	class_code"u"	XLOC_000049		1	1	12241705	12269423	+
TCONS_00000136	class_code"="	XLOC_000050	TFB1M	5	1	13558884	13624788	+
TCONS_00000137	class_code"j"	XLOC_000051	ENSSSCG00000026474	8	1	13745031	13899225	+
TCONS_00000138	class_code"u"	XLOC_000051		3	1	13745254	13758299	+
TCONS_00000139	class_code"j"	XLOC_000051	ENSSSCG00000026474	8	1	13745254	13899225	+
TCONS_00000140	class_code"u"	XLOC_000051		4	1	13745747	13758299	+
TCONS_00000141	class_code"u"	XLOC_000051		3	1	13745747	13821310	+
TCONS_00000142	class_code"j"	XLOC_000051	ENSSSCG00000026474	7	1	13746695	13899225	+
TCONS_00000143	class_code"j"	XLOC_000051	ENSSSCG00000026474	7	1	13752690	13899225	+
TCONS_00000144	class_code"u"	XLOC_000051		1	1	13755578	13758299	+
TCONS_00000145	class_code"j"	XLOC_000051	ENSSSCG00000026474	8	1	13755578	13899225	+
TCONS_00000146	class_code"u"	XLOC_000052		7	1	13788513	13899225	+
TCONS_00000147	class_code"u"	XLOC_000052		1	1	13794413	13797420	+
TCONS_00000148	class_code"j"	XLOC_000051	ENSSSCG00000026474	7	1	13794413	13899225	+
TCONS_00000149	class_code"u"	XLOC_000051		1	1	13820088	13821623	+
TCONS_00000150	class_code"j"	XLOC_000051	ENSSSCG00000026474	6	1	13860268	13899225	+
TCONS_00000151	class_code"u"	XLOC_000051		4	1	13879768	13894917	+
TCONS_00000152	class_code"j"	XLOC_000051	ENSSSCG00000026474	2	1	13758860	13776007	+
TCONS_00000153	class_code"="	XLOC_000051	ENSSSCG00000026474	2	1	13758868	13776007	+
TCONS_00000154	class_code"j"	XLOC_000053	CNKSR3	6	1	14406055	14429028	+
TCONS_00000155	class_code"j"	XLOC_000053	CNKSR3	12	1	14406055	14452373	+
TCONS_00000156	class_code"="	XLOC_000053	CNKSR3	13	1	14406885	14451537	+
TCONS_00000157	class_code"j"	XLOC_000053	CNKSR3	5	1	14407035	14429028	+
TCONS_00000158	class_code"j"	XLOC_000053	CNKSR3	7	1	14431881	14452373	+
TCONS_00000159	class_code"="	XLOC_000054	ENSSSCG00000025154	7	1	14507764	14510244	+
TCONS_00000160	class_code"="	XLOC_000055	RGS17	5	1	15590430	15689986	+
TCONS_00000161	class_code"j"	XLOC_000056	MTRF1L	2	1	15696600	15702492	+
TCONS_00000162	class_code"j"	XLOC_000056	MTRF1L	2	1	15696600	15702492	+
TCONS_00000163	class_code"j"	XLOC_000056	MTRF1L	5	1	15696600	15706643	+
TCONS_00000164	class_code"="	XLOC_000056	MTRF1L	7	1	15696600	15708425	+
TCONS_00000165	class_code"j"	XLOC_000056	MTRF1L	7	1	15696600	15709585	+
TCONS_00000166	class_code"="	XLOC_000056	MTRF1L	7	1	15696600	15709585	+
TCONS_00000167	class_code"j"	XLOC_000056	MTRF1L	6	1	15698807	15709585	+
TCONS_00000168	class_code"j"	XLOC_000057	FBXO5	3	1	15716047	15728596	+
TCONS_00000169	class_code"j"	XLOC_000057	FBXO5	3	1	15716047	15728596	+
TCONS_00000170	class_code"j"	XLOC_000057	FBXO5	4	1	15716047	15728596	+
TCONS_00000171	class_code"="	XLOC_000057	FBXO5	5	1	15717418	15728499	+
TCONS_00000172	class_code"="	XLOC_000058	ENSSSCG00000004078	3	1	15892180	15894013	+
TCONS_00000173	class_code"u"	XLOC_000059		2	1	15990463	15999500	+
TCONS_00000174	class_code"="	XLOC_000060	ENSSSCG00000024114	4	1	16255048	16258922	+
TCONS_00000175	class_code"u"	XLOC_000061		1	1	16312988	16316198	+
TCONS_00000176	class_code"u"	XLOC_000061		2	1	16312992	16313766	+
TCONS_00000177	class_code"j"	XLOC_000062	ENSSSCG00000004082	68	1	16316477	16508423	+
TCONS_00000178	class_code"j"	XLOC_000062	ENSSSCG00000004082	74	1	16316477	16508423	+
TCONS_00000179	class_code"j"	XLOC_000062	ENSSSCG00000004082	69	1	16316477	16508423	+
TCONS_00000180	class_code"j"	XLOC_000062	ENSSSCG00000004082	69	1	16316477	16508423	+
TCONS_00000181	class_code"j"	XLOC_000062	ENSSSCG00000004082	75	1	16316479	16508423	+
TCONS_00000182	class_code"j"	XLOC_000062	ENSSSCG00000004082	67	1	16316479	16508423	+
TCONS_00000183	class_code"j"	XLOC_000062	ENSSSCG00000004082	75	1	16316479	16508423	+
TCONS_00000184	class_code"="	XLOC_000062	ENSSSCG00000021273	36	1	16316573	16389026	+
TCONS_00000185	class_code"j"	XLOC_000062	ENSSSCG00000004082	62	1	16316573	16484240	+
TCONS_00000186	class_code"j"	XLOC_000062	ENSSSCG00000004082	50	1	16363105	16508423	+
TCONS_00000187	class_code"="	XLOC_000062	ENSSSCG00000004082	47	1	16390683	16507454	+
TCONS_00000188	class_code"j"	XLOC_000063	ENSSSCG00000004084	2	1	16602521	16608172	+
TCONS_00000189	class_code"="	XLOC_000063	ENSSSCG00000004084	2	1	16603094	16681556	+
TCONS_00000190	class_code"="	XLOC_000064	RMND1	12	1	17207014	17263726	+
TCONS_00000191	class_code"="	XLOC_000064	RMND1	12	1	17207037	17262700	+
TCONS_00000192	class_code"j"	XLOC_000064	RMND1	11	1	17207037	17263726	+
TCONS_00000193	class_code"j"	XLOC_000064	RMND1	12	1	17207037	17263726	+
TCONS_00000194	class_code"j"	XLOC_000064	RMND1	12	1	17219037	17263726	+
TCONS_00000195	class_code"j"	XLOC_000064	RMND1	11	1	17225431	17263726	+
TCONS_00000196	class_code"="	XLOC_000065	ZBTB2	2	1	17296718	17305906	+
TCONS_00000197	class_code"j"	XLOC_000066	ENSSSCG00000004098	6	1	18198211	18204337	+
TCONS_00000198	class_code"j"	XLOC_000066	ENSSSCG00000004098	6	1	18198211	18350543	+
TCONS_00000199	class_code"j"	XLOC_000066	ENSSSCG00000004098	5	1	18198223	18204337	+
TCONS_00000200	class_code"="	XLOC_000066	ENSSSCG00000004098	3	1	18199791	18201279	+
TCONS_00000201	class_code"="	XLOC_000067	ENSSSCG00000004096	1	1	18349519	18350634	+
TCONS_00000202	class_code"="	XLOC_000068	ENSSSCG00000004100	4	1	18220580	18223391	+
TCONS_00000203	class_code"u"	XLOC_000069		5	1	18318039	18323539	+
TCONS_00000204	class_code"u"	XLOC_000066		2	1	18347253	18349332	+
TCONS_00000205	class_code"j"	XLOC_000070	PCMT1	7	1	18434827	18474344	+
TCONS_00000206	class_code"j"	XLOC_000070	PCMT1	7	1	18440231	18474344	+
TCONS_00000207	class_code"="	XLOC_000070	PCMT1	6	1	18440911	18462186	+
TCONS_00000208	class_code"j"	XLOC_000070	PCMT1	7	1	18441532	18474344	+
TCONS_00000209	class_code"="	XLOC_000071	ULBP1	5	1	18557382	18563335	+
TCONS_00000210	class_code"o"	XLOC_000072	NUP43	2	1	18571866	18643214	+
TCONS_00000211	class_code"="	XLOC_000073	NUP43	8	1	18577500	18593413	+
TCONS_00000212	class_code"="	XLOC_000073	NUP43	8	1	18577605	18591615	+
TCONS_00000213	class_code"="	XLOC_000074	ENSSSCG00000004106	7	1	18600334	18633703	+
TCONS_00000214	class_code"j"	XLOC_000074	ENSSSCG00000004106	8	1	18600334	18634232	+
TCONS_00000215	class_code"j"	XLOC_000074	ENSSSCG00000004106	4	1	18627612	18634232	+
TCONS_00000216	class_code"j"	XLOC_000074	ENSSSCG00000004106	3	1	18628463	18634232	+
TCONS_00000217	class_code"="	XLOC_000075	ENSSSCG00000021892	3	1	18652922	18717358	+
TCONS_00000218	class_code"j"	XLOC_000075	ENSSSCG00000021892	4	1	18652922	18717692	+
TCONS_00000219	class_code"j"	XLOC_000076	PPIL4	2	1	18714376	18717692	+
TCONS_00000220	class_code"j"	XLOC_000076	PPIL4	9	1	18675025	18726454	+
TCONS_00000221	class_code"="	XLOC_000076	PPIL4	12	1	18675025	18766992	+
TCONS_00000222	class_code"j"	XLOC_000077	ENSSSCG00000004108	12	1	18675025	18766992	+
TCONS_00000223	class_code"="	XLOC_000077	ENSSSCG00000004108	3	1	18728719	18766992	+
TCONS_00000224	class_code"j"	XLOC_000075	ENSSSCG00000021892	5	1	18690550	18702876	+
TCONS_00000225	class_code"j"	XLOC_000076	PPIL4	4	1	18690550	18702876	+
TCONS_00000226	class_code"="	XLOC_000078	ZC3H12D	6	1	18783704	18819681	+
TCONS_00000227	class_code"j"	XLOC_000079	SHPRH	30	1	21856588	21937719	+
TCONS_00000228	class_code"j"	XLOC_000079	SHPRH	30	1	21856604	21937719	+
TCONS_00000229	class_code"j"	XLOC_000079	SHPRH	30	1	21856604	21937719	+
TCONS_00000230	class_code"j"	XLOC_000079	SHPRH	30	1	21856604	21937719	+
TCONS_00000231	class_code"j"	XLOC_000079	SHPRH	30	1	21856655	21937719	+
TCONS_00000232	class_code"="	XLOC_000079	SHPRH	30	1	21856691	21937117	+
TCONS_00000233	class_code"j"	XLOC_000079	SHPRH	30	1	21856691	21941413	+
TCONS_00000234	class_code"j"	XLOC_000079	SHPRH	30	1	21857048	21937719	+
TCONS_00000235	class_code"j"	XLOC_000079	SHPRH	28	1	21867976	21941413	+
TCONS_00000236	class_code"="	XLOC_000080	FBXO30	3	1	21999971	22016735	+
TCONS_00000237	class_code"j"	XLOC_000080	FBXO30	3	1	21999971	22023647	+
TCONS_00000238	class_code"="	XLOC_000080	FBXO30	3	1	21999971	22023647	+
TCONS_00000239	class_code"="	XLOC_000081	EPM2A	4	1	22049644	22140116	+
TCONS_00000240	class_code"="	XLOC_000081	EPM2A	4	1	22050548	22136486	+
TCONS_00000241	class_code"u"	XLOC_000082		2	1	23568221	23569084	+
TCONS_00000242	class_code"u"	XLOC_000083		5	1	23640933	23686798	+
TCONS_00000243	class_code"j"	XLOC_000083	PLAGL1	8	1	23640933	23708062	+
TCONS_00000244	class_code"j"	XLOC_000083	PLAGL1	7	1	23640933	23708062	+
TCONS_00000245	class_code"j"	XLOC_000083	PLAGL1	6	1	23641017	23708062	+
TCONS_00000246	class_code"u"	XLOC_000083		3	1	23641035	23677495	+
TCONS_00000247	class_code"u"	XLOC_000083		5	1	23641035	23682025	+
TCONS_00000248	class_code"j"	XLOC_000083	PLAGL1	8	1	23641050	23708062	+
TCONS_00000249	class_code"u"	XLOC_000083		4	1	23641071	23686798	+
TCONS_00000250	class_code"u"	XLOC_000083		1	1	23671622	23677495	+
TCONS_00000251	class_code"j"	XLOC_000083	PLAGL1	2	1	23686910	23708062	+
TCONS_00000252	class_code"="	XLOC_000083	PLAGL1	3	1	23687362	23707500	+
TCONS_00000253	class_code"j"	XLOC_000083	PLAGL1	3	1	23687362	23708062	+
TCONS_00000254	class_code"j"	XLOC_000083	PLAGL1	2	1	23700583	23708062	+
TCONS_00000255	class_code"="	XLOC_000084	ENSSSCG00000023897	2	1	23798813	23819078	+
TCONS_00000256	class_code"="	XLOC_000085	ENSSSCG00000021733	2	1	23801605	23804537	+
TCONS_00000257	class_code"j"	XLOC_000086	ENSSSCG00000004130	2	1	23807088	23809051	+
TCONS_00000258	class_code"="	XLOC_000086	ENSSSCG00000004130	5	1	23807088	23818104	+
TCONS_00000259	class_code"j"	XLOC_000086	ENSSSCG00000004130	3	1	23815320	23818292	+
TCONS_00000260	class_code"="	XLOC_000087	FUCA2	7	1	24129146	24151404	+
TCONS_00000261	class_code"j"	XLOC_000087	FUCA2	7	1	24130023	24151404	+
TCONS_00000262	class_code"j"	XLOC_000087	FUCA2	7	1	24130214	24151404	+
TCONS_00000263	class_code"x"	XLOC_000088	PEX3	1	1	24156238	24160468	+
TCONS_00000264	class_code"j"	XLOC_000089	ADAT2	6	1	24188820	24213491	+
TCONS_00000265	class_code"="	XLOC_000089	ADAT2	7	1	24188820	24213491	+
TCONS_00000266	class_code"u"	XLOC_000090		1	1	24694974	24736752	+
TCONS_00000267	class_code"o"	XLOC_000090	ENSSSCG00000004137	3	1	24694974	24867634	+
TCONS_00000268	class_code"o"	XLOC_000090	ENSSSCG00000004137	3	1	24698166	24867634	+
TCONS_00000269	class_code"u"	XLOC_000090		2	1	24698260	24736750	+
TCONS_00000270	class_code"u"	XLOC_000090		4	1	24698260	24816526	+
TCONS_00000271	class_code"u"	XLOC_000090		3	1	24698260	24816526	+
TCONS_00000272	class_code"o"	XLOC_000090	ENSSSCG00000004137	3	1	24698260	24867634	+
TCONS_00000273	class_code"o"	XLOC_000090	ENSSSCG00000004137	4	1	24698260	24867634	+
TCONS_00000274	class_code"u"	XLOC_000090		1	1	24786752	24816530	+
TCONS_00000275	class_code"u"	XLOC_000090		1	1	24787619	24816530	+
TCONS_00000276	class_code"o"	XLOC_000090	ENSSSCG00000004137	2	1	24790380	24867634	+
TCONS_00000277	class_code"="	XLOC_000090	ENSSSCG00000004137	1	1	24832597	24867634	+
TCONS_00000278	class_code"="	XLOC_000090	ENSSSCG00000004137	1	1	24860640	24860769	+
TCONS_00000279	class_code"j"	XLOC_000091	ADGRG6	21	1	25289963	25409885	+
TCONS_00000280	class_code"j"	XLOC_000091	ADGRG6	5	1	25290206	25370497	+
TCONS_00000281	class_code"="	XLOC_000091	ADGRG6	22	1	25290206	25409275	+
TCONS_00000282	class_code"j"	XLOC_000091	ADGRG6	22	1	25290206	25409885	+
TCONS_00000283	class_code"j"	XLOC_000091	ADGRG6	16	1	25348722	25409885	+
TCONS_00000284	class_code"j"	XLOC_000091	ADGRG6	20	1	25348722	25409885	+
TCONS_00000285	class_code"j"	XLOC_000091	ADGRG6	15	1	25380505	25409885	+
TCONS_00000286	class_code"="	XLOC_000092	ENSSSCG00000019021	1	1	26578923	26579017	+
TCONS_00000287	class_code"="	XLOC_000093	U6	1	1	28141202	28141309	+
TCONS_00000288	class_code"o"	XLOC_000094	CITED2	2	1	28295027	28297607	+
TCONS_00000289	class_code"="	XLOC_000094	CITED2	1	1	28295772	28296594	+
TCONS_00000290	class_code"j"	XLOC_000095	TXLNB	7	1	28367301	28411013	+
TCONS_00000291	class_code"j"	XLOC_000095	TXLNB	10	1	28367301	28430825	+
TCONS_00000292	class_code"="	XLOC_000095	TXLNB	9	1	28367312	28430825	+
TCONS_00000293	class_code"="	XLOC_000095	TXLNB	9	1	28370897	28423000	+
TCONS_00000294	class_code"j"	XLOC_000096	REPS1	19	1	28641684	28700672	+
TCONS_00000295	class_code"j"	XLOC_000096	REPS1	19	1	28641687	28700672	+
TCONS_00000296	class_code"j"	XLOC_000096	REPS1	20	1	28641687	28700672	+
TCONS_00000297	class_code"j"	XLOC_000096	REPS1	19	1	28641695	28700672	+
TCONS_00000298	class_code"j"	XLOC_000096	REPS1	20	1	28641695	28700672	+
TCONS_00000299	class_code"="	XLOC_000096	REPS1	20	1	28642043	28700509	+
TCONS_00000300	class_code"="	XLOC_000096	REPS1	9	1	28662745	28691166	+
TCONS_00000301	class_code"j"	XLOC_000096	REPS1	12	1	28670200	28700672	+
TCONS_00000302	class_code"="	XLOC_000096	REPS1	2	1	28697761	28700467	+
TCONS_00000303	class_code"j"	XLOC_000097	NHSL1	4	1	28798816	29098713	+
TCONS_00000304	class_code"="	XLOC_000097	NHSL1	7	1	28871319	29126558	+
TCONS_00000305	class_code"j"	XLOC_000097	NHSL1	4	1	28985912	29098713	+
TCONS_00000306	class_code"j"	XLOC_000097	NHSL1	5	1	29012294	29107510	+
TCONS_00000307	class_code"j"	XLOC_000097	NHSL1	4	1	29012410	29098713	+
TCONS_00000308	class_code"j"	XLOC_000097	NHSL1	7	1	29012410	29126558	+
TCONS_00000309	class_code"j"	XLOC_000097	NHSL1	2	1	29012455	29058530	+
TCONS_00000310	class_code"j"	XLOC_000097	NHSL1	5	1	29082393	29126558	+
TCONS_00000311	class_code"="	XLOC_000098	SNORA70	1	1	29129315	29129436	+
TCONS_00000312	class_code"="	XLOC_000099	U6	1	1	29173673	29173777	+
TCONS_00000313	class_code"="	XLOC_000100	ENSSSCG00000004151	1	1	29179675	29180134	+
TCONS_00000314	class_code"u"	XLOC_000101		5	1	29367896	29374543	+
TCONS_00000315	class_code"="	XLOC_000102	OLIG3	1	1	30151021	30151840	+
TCONS_00000316	class_code"="	XLOC_000103	IFNGR1	8	1	30388404	30408868	+
TCONS_00000317	class_code"="	XLOC_000103	IFNGR1	7	1	30388404	30408868	+
TCONS_00000318	class_code"j"	XLOC_000103	IFNGR1	7	1	30388404	30409354	+
TCONS_00000319	class_code"="	XLOC_000104	IL22RA2	6	1	30464341	30483952	+
TCONS_00000320	class_code"="	XLOC_000104	IL22RA2	5	1	30464358	30484047	+
TCONS_00000321	class_code"="	XLOC_000104	IL22RA2	5	1	30467399	30483722	+
TCONS_00000322	class_code"="	XLOC_000105	ENSSSCG00000004157	6	1	30531067	30561798	+
TCONS_00000323	class_code"="	XLOC_000105	ENSSSCG00000004157	4	1	30549265	30561798	+
TCONS_00000324	class_code"="	XLOC_000106	SLC35D3	2	1	30637619	30639787	+
TCONS_00000325	class_code"="	XLOC_000107	U6	1	1	30733068	30733164	+
TCONS_00000326	class_code"j"	XLOC_000108	ENSSSCG00000026041	24	1	30747546	31002121	+
TCONS_00000327	class_code"="	XLOC_000108	ENSSSCG00000026041	28	1	30747546	31011709	+
TCONS_00000328	class_code"j"	XLOC_000108	ENSSSCG00000026041	28	1	30747546	31012874	+
TCONS_00000329	class_code"="	XLOC_000108	ENSSSCG00000026041	28	1	30747546	31012874	+
TCONS_00000330	class_code"="	XLOC_000108	MAP3K5	5	1	30747600	30883512	+
TCONS_00000331	class_code"x"	XLOC_000109	PEX7	27	1	30877157	31012874	+
TCONS_00000332	class_code"x"	XLOC_000110	PEX7	1	1	30754138	30755234	+
TCONS_00000333	class_code"x"	XLOC_000111	PEX7	1	1	30759249	30760021	+
TCONS_00000334	class_code"j"	XLOC_000108	ENSSSCG00000026041	1	1	30769007	30769394	+
TCONS_00000335	class_code"j"	XLOC_000112	PDE7B	12	1	31359773	31434786	+
TCONS_00000336	class_code"j"	XLOC_000112	PDE7B	11	1	31359773	31434786	+
TCONS_00000337	class_code"j"	XLOC_000112	PDE7B	11	1	31359773	31434786	+
TCONS_00000338	class_code"="	XLOC_000112	PDE7B	10	1	31384823	31434786	+
TCONS_00000339	class_code"u"	XLOC_000113		2	1	31451464	31457827	+
TCONS_00000340	class_code"u"	XLOC_000114		1	1	31606376	31663880	+
TCONS_00000341	class_code"u"	XLOC_000114		2	1	31606376	31686063	+
TCONS_00000342	class_code"u"	XLOC_000114		2	1	31606376	31686063	+
TCONS_00000343	class_code"u"	XLOC_000114		2	1	31606376	31686063	+
TCONS_00000344	class_code"u"	XLOC_000114		1	1	31664075	31686063	+
TCONS_00000345	class_code"j"	XLOC_000115	AHI1	27	1	32048940	32243943	+
TCONS_00000346	class_code"j"	XLOC_000115	AHI1	26	1	32049029	32243943	+
TCONS_00000347	class_code"j"	XLOC_000115	AHI1	24	1	32049040	32243943	+
TCONS_00000348	class_code"j"	XLOC_000115	AHI1	27	1	32049040	32243943	+
TCONS_00000349	class_code"j"	XLOC_000115	AHI1	23	1	32049043	32166109	+
TCONS_00000350	class_code"j"	XLOC_000115	AHI1	26	1	32049103	32243943	+
TCONS_00000351	class_code"="	XLOC_000115	AHI1	29	1	32049105	32243731	+
TCONS_00000352	class_code"j"	XLOC_000115	AHI1	26	1	32049105	32243943	+
TCONS_00000353	class_code"j"	XLOC_000115	AHI1	29	1	32049105	32243943	+
TCONS_00000354	class_code"j"	XLOC_000116	HBS1L	5	1	32459567	32475111	+
TCONS_00000355	class_code"j"	XLOC_000116	HBS1L	19	1	32459567	32544277	+
TCONS_00000356	class_code"="	XLOC_000116	HBS1L	19	1	32459601	32540970	+
TCONS_00000357	class_code"j"	XLOC_000116	HBS1L	12	1	32516302	32544277	+
TCONS_00000358	class_code"="	XLOC_000117	ENSSSCG00000028115	5	1	32551856	32561371	+
TCONS_00000359	class_code"="	XLOC_000118	ENSSSCG00000019507	1	1	33051967	33052106	+
TCONS_00000360	class_code"j"	XLOC_000119	SGK1	12	1	33248379	33256318	+
TCONS_00000361	class_code"="	XLOC_000119	SGK1	12	1	33250474	33256209	+
TCONS_00000362	class_code"="	XLOC_000120	SLC2A12	5	1	33338287	33400551	+
TCONS_00000363	class_code"="	XLOC_000121	ENSSSCG00000004175	1	1	33703682	33704035	+
TCONS_00000364	class_code"u"	XLOC_000122		2	1	34293238	34307063	+
TCONS_00000365	class_code"j"	XLOC_000123	SLC18B1	15	1	34452981	34474149	+
TCONS_00000366	class_code"j"	XLOC_000123	SLC18B1	10	1	34453011	34468004	+
TCONS_00000367	class_code"j"	XLOC_000123	SLC18B1	14	1	34453011	34473091	+
TCONS_00000368	class_code"j"	XLOC_000123	SLC18B1	15	1	34453011	34474149	+
TCONS_00000369	class_code"j"	XLOC_000123	SLC18B1	15	1	34453136	34473091	+
TCONS_00000370	class_code"j"	XLOC_000123	SLC18B1	14	1	34453174	34473091	+
TCONS_00000371	class_code"="	XLOC_000123	SLC18B1	15	1	34453174	34474149	+
TCONS_00000372	class_code"j"	XLOC_000123	SLC18B1	14	1	34453274	34473091	+
TCONS_00000373	class_code"j"	XLOC_000123	SLC18B1	14	1	34453987	34474149	+
TCONS_00000374	class_code"j"	XLOC_000123	SLC18B1	14	1	34459941	34474149	+
TCONS_00000375	class_code"j"	XLOC_000123	SLC18B1	12	1	34460121	34473091	+
TCONS_00000376	class_code"="	XLOC_000124	VNN2	9	1	34481247	34490749	+
TCONS_00000377	class_code"="	XLOC_000125	ENSSSCG00000004180	7	1	34501160	34513006	+
TCONS_00000378	class_code"="	XLOC_000126	VNN1	7	1	34523096	34543521	+
TCONS_00000379	class_code"="	XLOC_000127	U6	1	1	34531838	34531942	+
TCONS_00000380	class_code"="	XLOC_000128	TAAR1	1	1	34568649	34569669	+
TCONS_00000381	class_code"="	XLOC_000129	TAAR2	3	1	34587864	34594760	+
TCONS_00000382	class_code"="	XLOC_000130	ENSSSCG00000004184	1	1	34616703	34617747	+
TCONS_00000383	class_code"="	XLOC_000131	TAAR5	1	1	34624797	34625811	+
TCONS_00000384	class_code"="	XLOC_000132	TAAR8	1	1	34636200	34637229	+
TCONS_00000385	class_code"="	XLOC_000133	ENSSSCG00000027456	1	1	34645222	34646263	+
TCONS_00000386	class_code"="	XLOC_000134	ENSSSCG00000004187	1	1	34651154	34652231	+
TCONS_00000387	class_code"="	XLOC_000135	STX7	10	1	34705598	34758122	+
TCONS_00000388	class_code"j"	XLOC_000135	STX7	11	1	34705598	34758696	+
TCONS_00000389	class_code"="	XLOC_000136	U1	1	1	34795820	34795988	+
TCONS_00000390	class_code"="	XLOC_000137	MOXD1	12	1	34802961	34888612	+
TCONS_00000391	class_code"u"	XLOC_000138		2	1	35170992	35195294	+
TCONS_00000392	class_code"u"	XLOC_000139		1	1	35195861	35201794	+
TCONS_00000393	class_code"u"	XLOC_000139		3	1	35195861	35202900	+
TCONS_00000394	class_code"="	XLOC_000140	ENSSSCG00000004197	2	1	35412722	35413272	+
TCONS_00000395	class_code"="	XLOC_000141	ENSSSCG00000023740	6	1	35443501	35461217	+
TCONS_00000396	class_code"="	XLOC_000142	ARG1	4	1	35463101	35466461	+
TCONS_00000397	class_code"="	XLOC_000142	ARG1	4	1	35463555	35465793	+
TCONS_00000398	class_code"="	XLOC_000142	ARG1	4	1	35463606	35464819	+
TCONS_00000399	class_code"="	XLOC_000143	ENSSSCG00000029065	15	1	35558744	35575903	+
TCONS_00000400	class_code"j"	XLOC_000144	ENSSSCG00000004199	11	1	35916380	35989324	+
TCONS_00000401	class_code"j"	XLOC_000144	ENSSSCG00000004199	12	1	35916380	35996964	+
TCONS_00000402	class_code"j"	XLOC_000144	ENSSSCG00000004199	19	1	35916380	36027604	+
TCONS_00000403	class_code"j"	XLOC_000144	ENSSSCG00000004199	14	1	35916491	35996964	+
TCONS_00000404	class_code"j"	XLOC_000144	ENSSSCG00000004199	13	1	35916491	35996964	+
TCONS_00000405	class_code"j"	XLOC_000144	ENSSSCG00000004199	21	1	35916491	36027604	+
TCONS_00000406	class_code"j"	XLOC_000144	ENSSSCG00000004199	21	1	35916491	36027604	+
TCONS_00000407	class_code"j"	XLOC_000144	ENSSSCG00000004199	20	1	35916491	36027604	+
TCONS_00000408	class_code"j"	XLOC_000144	ENSSSCG00000004199	20	1	35916491	36027604	+
TCONS_00000409	class_code"j"	XLOC_000144	ENSSSCG00000004199	17	1	35916491	36027604	+
TCONS_00000410	class_code"="	XLOC_000144	ENSSSCG00000004199	19	1	35916768	36027433	+
TCONS_00000411	class_code"="	XLOC_000145	SAMD3	10	1	36583231	36629478	+
TCONS_00000412	class_code"u"	XLOC_000146		2	1	36883742	36886630	+
TCONS_00000413	class_code"u"	XLOC_000146		1	1	36884573	36886630	+
TCONS_00000414	class_code"="	XLOC_000147	ENSSSCG00000004205	8	1	37112453	37148333	+
TCONS_00000415	class_code"j"	XLOC_000147	ENSSSCG00000004205	8	1	37112453	37148333	+
TCONS_00000416	class_code"="	XLOC_000147	ENSSSCG00000004205	8	1	37112970	37147471	+
TCONS_00000417	class_code"="	XLOC_000148	ENSSSCG00000004206	5	1	37338697	37362176	+
TCONS_00000418	class_code"="	XLOC_000148	ENSSSCG00000004206	5	1	37339066	37361360	+
TCONS_00000419	class_code"u"	XLOC_000149		4	1	37545646	37563281	+
TCONS_00000420	class_code"u"	XLOC_000149		5	1	37545647	37563281	+
TCONS_00000421	class_code"j"	XLOC_000150	PTPRK	30	1	38212831	38839966	+
TCONS_00000422	class_code"j"	XLOC_000150	PTPRK	32	1	38212856	38839966	+
TCONS_00000423	class_code"j"	XLOC_000150	PTPRK	31	1	38212856	38839966	+
TCONS_00000424	class_code"j"	XLOC_000150	PTPRK	15	1	38212858	38788347	+
TCONS_00000425	class_code"="	XLOC_000150	PTPRK	32	1	38212862	38839873	+
TCONS_00000426	class_code"="	XLOC_000151	ENSSSCG00000024392	2	1	38932150	38997305	+
TCONS_00000427	class_code"="	XLOC_000152	ENSSSCG00000004213	6	1	39200193	39218441	+
TCONS_00000428	class_code"="	XLOC_000153	ENSSSCG00000004214	3	1	39392858	39429424	+
TCONS_00000429	class_code"j"	XLOC_000154	KIAA0408	2	1	39452654	39458724	+
TCONS_00000430	class_code"="	XLOC_000154	KIAA0408	6	1	39452654	39466770	+
TCONS_00000431	class_code"="	XLOC_000154	KIAA0408	6	1	39452654	39476369	+
TCONS_00000432	class_code"j"	XLOC_000154	KIAA0408	4	1	39453451	39476369	+
TCONS_00000433	class_code"j"	XLOC_000154	KIAA0408	5	1	39453451	39476369	+
TCONS_00000434	class_code"u"	XLOC_000155		1	1	39547255	39548907	+
TCONS_00000435	class_code"j"	XLOC_000155	ENSSSCG00000004216	5	1	39547702	39578112	+
TCONS_00000436	class_code"j"	XLOC_000155	ENSSSCG00000004216	6	1	39547702	39594814	+
TCONS_00000437	class_code"="	XLOC_000155	ENSSSCG00000004216	5	1	39565182	39593566	+
TCONS_00000438	class_code"j"	XLOC_000155	ENSSSCG00000004216	4	1	39565182	39594814	+
TCONS_00000439	class_code"x"	XLOC_000156	RSPO3	2	1	39784072	39797804	+
TCONS_00000440	class_code"x"	XLOC_000156	RSPO3	3	1	39785047	39806314	+
TCONS_00000441	class_code"j"	XLOC_000157	HDDC2	5	1	41395555	41415556	+
TCONS_00000442	class_code"j"	XLOC_000157	HDDC2	3	1	41395565	41398764	+
TCONS_00000443	class_code"="	XLOC_000157	HDDC2	6	1	41395602	41415268	+
TCONS_00000444	class_code"="	XLOC_000158	7SK	1	1	41992343	41992658	+
TCONS_00000445	class_code"="	XLOC_000159	ENSSSCG00000024066	1	1	42557089	42558664	+
TCONS_00000446	class_code"j"	XLOC_000160	ENSSSCG00000027613	14	1	43465975	43654878	+
TCONS_00000447	class_code"j"	XLOC_000160	ENSSSCG00000027613	25	1	43465975	43750740	+
TCONS_00000448	class_code"j"	XLOC_000160	ENSSSCG00000027613	12	1	43484108	43654878	+
TCONS_00000449	class_code"j"	XLOC_000160	ENSSSCG00000027613	14	1	43484108	43654878	+
TCONS_00000450	class_code"j"	XLOC_000160	ENSSSCG00000027613	2	1	43484150	43487495	+
TCONS_00000451	class_code"j"	XLOC_000160	ENSSSCG00000027613	13	1	43484150	43654299	+
TCONS_00000452	class_code"j"	XLOC_000160	ENSSSCG00000027613	12	1	43484150	43654299	+
TCONS_00000453	class_code"="	XLOC_000160	ENSSSCG00000027613	6	1	43484627	43531456	+
TCONS_00000454	class_code"u"	XLOC_000160		1	1	43584636	43587368	+
TCONS_00000455	class_code"u"	XLOC_000160		1	1	43637418	43694062	+
TCONS_00000456	class_code"u"	XLOC_000160		6	1	43654961	43688517	+
TCONS_00000457	class_code"u"	XLOC_000160		10	1	43655539	43745398	+
TCONS_00000458	class_code"u"	XLOC_000160		5	1	43658196	43688517	+
TCONS_00000459	class_code"u"	XLOC_000160		5	1	43658196	43688517	+
TCONS_00000460	class_code"u"	XLOC_000160		11	1	43658196	43750740	+
TCONS_00000461	class_code"u"	XLOC_000161		1	1	43751360	43758095	+
TCONS_00000462	class_code"j"	XLOC_000161	ENSSSCG00000004231	13	1	43751360	43802472	+
TCONS_00000463	class_code"j"	XLOC_000161	ENSSSCG00000004231	13	1	43751360	43802472	+
TCONS_00000464	class_code"j"	XLOC_000161	ENSSSCG00000004231	13	1	43751388	43802472	+
TCONS_00000465	class_code"u"	XLOC_000161		2	1	43751396	43759333	+
TCONS_00000466	class_code"u"	XLOC_000161		4	1	43751396	43759333	+
TCONS_00000467	class_code"j"	XLOC_000161	ENSSSCG00000004231	13	1	43751684	43802472	+
TCONS_00000468	class_code"j"	XLOC_000161	ENSSSCG00000004231	11	1	43752587	43802472	+
TCONS_00000469	class_code"j"	XLOC_000161	ENSSSCG00000004231	10	1	43752587	43802472	+
TCONS_00000470	class_code"j"	XLOC_000161	ENSSSCG00000004231	12	1	43753522	43802472	+
TCONS_00000471	class_code"="	XLOC_000161	ENSSSCG00000004231	3	1	43787654	43792674	+
TCONS_00000472	class_code"="	XLOC_000162	ENSSSCG00000004235	3	1	44116754	44118440	+
TCONS_00000473	class_code"="	XLOC_000163	SERINC1	7	1	44437367	44446826	+
TCONS_00000474	class_code"j"	XLOC_000164	ENSSSCG00000025075	3	1	44519537	44543186	+
TCONS_00000475	class_code"="	XLOC_000164	ENSSSCG00000025075	2	1	44537049	44540322	+
TCONS_00000476	class_code"j"	XLOC_000165	TBC1D32	13	1	45614735	45673816	+
TCONS_00000477	class_code"j"	XLOC_000165	TBC1D32	34	1	45614735	45823854	+
TCONS_00000478	class_code"j"	XLOC_000165	TBC1D32	34	1	45614735	45823854	+
TCONS_00000479	class_code"j"	XLOC_000165	TBC1D32	34	1	45614735	45823854	+
TCONS_00000480	class_code"j"	XLOC_000165	TBC1D32	11	1	45615047	45673816	+
TCONS_00000481	class_code"="	XLOC_000165	TBC1D32	33	1	45615047	45819794	+
TCONS_00000482	class_code"j"	XLOC_000165	TBC1D32	9	1	45651788	45673816	+
TCONS_00000483	class_code"j"	XLOC_000165	TBC1D32	21	1	45675170	45823854	+
TCONS_00000484	class_code"j"	XLOC_000165	TBC1D32	19	1	45675170	45823854	+
TCONS_00000485	class_code"j"	XLOC_000165	TBC1D32	19	1	45691297	45823854	+
TCONS_00000486	class_code"j"	XLOC_000165	TBC1D32	13	1	45705715	45823854	+
TCONS_00000487	class_code"j"	XLOC_000165	TBC1D32	14	1	45705715	45823854	+
TCONS_00000488	class_code"j"	XLOC_000166	MAN1A1	13	1	47894246	48059889	+
TCONS_00000489	class_code"="	XLOC_000166	MAN1A1	12	1	47894248	48059889	+
TCONS_00000490	class_code"="	XLOC_000166	MAN1A1	12	1	47894683	48057901	+
TCONS_00000491	class_code"="	XLOC_000167	FAM184A	16	1	48197139	48263560	+
TCONS_00000492	class_code"j"	XLOC_000168	MCM9	8	1	48322103	48382081	+
TCONS_00000493	class_code"j"	XLOC_000168	MCM9	14	1	48322103	48416533	+
TCONS_00000494	class_code"j"	XLOC_000168	MCM9	13	1	48322157	48416533	+
TCONS_00000495	class_code"="	XLOC_000168	MCM9	13	1	48325948	48416533	+
TCONS_00000496	class_code"="	XLOC_000169	ENSSSCG00000030488	2	1	48488366	48499262	+
TCONS_00000497	class_code"="	XLOC_000169	ENSSSCG00000030488	2	1	48488863	48498362	+
TCONS_00000498	class_code"u"	XLOC_000170		1	1	48515712	48516709	+
TCONS_00000499	class_code"u"	XLOC_000170		2	1	48516402	48522310	+
TCONS_00000500	class_code"u"	XLOC_000170		1	1	48518102	48519686	+
TCONS_00000501	class_code"j"	XLOC_000171	CEP85L	3	1	48574646	48671579	+
TCONS_00000502	class_code"j"	XLOC_000171	CEP85L	12	1	48574646	48783629	+
TCONS_00000503	class_code"="	XLOC_000171	CEP85L	13	1	48574646	48795738	+
TCONS_00000504	class_code"="	XLOC_000171	CEP85L	13	1	48621906	48789033	+
TCONS_00000505	class_code"="	XLOC_000172	ENSSSCG00000023536	2	1	48680569	48680754	+
TCONS_00000506	class_code"j"	XLOC_000173	ENSSSCG00000004253	9	1	49584097	49635568	+
TCONS_00000507	class_code"="	XLOC_000173	ENSSSCG00000004253	8	1	49584097	49635568	+
TCONS_00000508	class_code"="	XLOC_000173	ENSSSCG00000004253	9	1	49584182	49627902	+
TCONS_00000509	class_code"j"	XLOC_000174	ROS1	18	1	49755479	49797651	+
TCONS_00000510	class_code"="	XLOC_000174	ROS1	52	1	49755479	49862725	+
TCONS_00000511	class_code"j"	XLOC_000174	ROS1	4	1	49783310	49791075	+
TCONS_00000512	class_code"j"	XLOC_000174	ROS1	41	1	49784686	49862725	+
TCONS_00000513	class_code"j"	XLOC_000174	ROS1	39	1	49789590	49862725	+
TCONS_00000514	class_code"j"	XLOC_000174	ROS1	34	1	49791954	49838790	+
TCONS_00000515	class_code"j"	XLOC_000174	ROS1	2	1	49812650	49814808	+
TCONS_00000516	class_code"j"	XLOC_000174	ROS1	6	1	49837716	49862725	+
TCONS_00000517	class_code"u"	XLOC_000175		3	1	49904605	50042261	+
TCONS_00000518	class_code"u"	XLOC_000175		4	1	49904605	50042261	+
TCONS_00000519	class_code"u"	XLOC_000175		4	1	49904605	50042261	+
TCONS_00000520	class_code"u"	XLOC_000175		4	1	49904608	49980450	+
TCONS_00000521	class_code"u"	XLOC_000175		3	1	49904609	49980450	+
TCONS_00000522	class_code"u"	XLOC_000175		3	1	49904609	49980450	+
TCONS_00000523	class_code"u"	XLOC_000175		4	1	49904609	50042261	+
TCONS_00000524	class_code"u"	XLOC_000175		4	1	49904609	50042261	+
TCONS_00000525	class_code"u"	XLOC_000175		1	1	49920816	49924064	+
TCONS_00000526	class_code"u"	XLOC_000175		1	1	49967333	49980450	+
TCONS_00000527	class_code"u"	XLOC_000175		1	1	50030373	50042261	+
TCONS_00000528	class_code"="	XLOC_000176	U6	1	1	50115625	50115740	+
TCONS_00000529	class_code"="	XLOC_000177	ENSSSCG00000004259	3	1	50131243	50136085	+
TCONS_00000530	class_code"="	XLOC_000178	FAM162B	4	1	50163017	50171193	+
TCONS_00000531	class_code"="	XLOC_000179	ENSSSCG00000004261	1	1	50172727	50173054	+
TCONS_00000532	class_code"="	XLOC_000180	ENSSSCG00000004263	10	1	50213030	50234411	+
TCONS_00000533	class_code"="	XLOC_000181	ENSSSCG00000023834	2	1	50284979	50290956	+
TCONS_00000534	class_code"="	XLOC_000182	ENSSSCG00000029062	4	1	50341373	50346343	+
TCONS_00000535	class_code"="	XLOC_000183	ENSSSCG00000025496	3	1	50348131	50351090	+
TCONS_00000536	class_code"="	XLOC_000184	ENSSSCG00000025941	5	1	50511750	50523126	+
TCONS_00000537	class_code"j"	XLOC_000184	ENSSSCG00000025941	6	1	50511750	50523283	+
TCONS_00000538	class_code"j"	XLOC_000184	ENSSSCG00000025941	7	1	50511750	50523283	+
TCONS_00000539	class_code"j"	XLOC_000184	ENSSSCG00000025941	5	1	50511750	50523283	+
TCONS_00000540	class_code"j"	XLOC_000184	ENSSSCG00000025941	5	1	50511750	50523283	+
TCONS_00000541	class_code"j"	XLOC_000184	ENSSSCG00000025941	6	1	50513020	50523283	+
TCONS_00000542	class_code"="	XLOC_000185	U6	1	1	54881825	54881932	+
TCONS_00000543	class_code"o"	XLOC_000186	ENSSSCG00000029872	3	1	54977542	54982787	+
TCONS_00000544	class_code"="	XLOC_000186	ENSSSCG00000029872	1	1	54980594	54981362	+
TCONS_00000545	class_code"="	XLOC_000187	U6	1	1	55148418	55148525	+
TCONS_00000546	class_code"="	XLOC_000188	ADGRB3	28	1	55298661	55774196	+
TCONS_00000547	class_code"="	XLOC_000189	ENSSSCG00000029565	1	1	55947838	55947932	+
TCONS_00000548	class_code"j"	XLOC_000190	COL19A1	18	1	56203979	56439215	+
TCONS_00000549	class_code"j"	XLOC_000190	COL19A1	50	1	56203979	56535542	+
TCONS_00000550	class_code"="	XLOC_000190	COL19A1	51	1	56203979	56555009	+
TCONS_00000551	class_code"j"	XLOC_000190	COL19A1	52	1	56203979	56558179	+
TCONS_00000552	class_code"j"	XLOC_000190	COL19A1	51	1	56203979	56558179	+
TCONS_00000553	class_code"j"	XLOC_000190	COL19A1	52	1	56203979	56558179	+
TCONS_00000554	class_code"="	XLOC_000190	COL19A1	52	1	56203979	56558179	+
TCONS_00000555	class_code"j"	XLOC_000190	COL19A1	52	1	56203979	56558179	+
TCONS_00000556	class_code"j"	XLOC_000190	COL19A1	51	1	56203979	56558179	+
TCONS_00000557	class_code"j"	XLOC_000190	COL19A1	52	1	56203979	56558179	+
TCONS_00000558	class_code"j"	XLOC_000190	COL19A1	52	1	56203979	56558179	+
TCONS_00000559	class_code"j"	XLOC_000191	FAM135A	22	1	56854825	56989577	+
TCONS_00000560	class_code"j"	XLOC_000191	FAM135A	23	1	56854831	56989577	+
TCONS_00000561	class_code"j"	XLOC_000191	FAM135A	23	1	56854831	56989577	+
TCONS_00000562	class_code"j"	XLOC_000191	FAM135A	23	1	56854833	56989577	+
TCONS_00000563	class_code"j"	XLOC_000191	FAM135A	23	1	56854833	56989577	+
TCONS_00000564	class_code"j"	XLOC_000191	FAM135A	23	1	56854833	56989577	+
TCONS_00000565	class_code"j"	XLOC_000191	FAM135A	15	1	56854834	56967992	+
TCONS_00000566	class_code"j"	XLOC_000191	FAM135A	22	1	56854834	56989577	+
TCONS_00000567	class_code"j"	XLOC_000191	FAM135A	21	1	56854834	56989577	+
TCONS_00000568	class_code"j"	XLOC_000191	FAM135A	22	1	56854834	56989577	+
TCONS_00000569	class_code"j"	XLOC_000191	FAM135A	18	1	56918207	56989577	+
TCONS_00000570	class_code"="	XLOC_000191	FAM135A	18	1	56918207	56989577	+
TCONS_00000571	class_code"j"	XLOC_000191	FAM135A	14	1	56923686	56989577	+
TCONS_00000572	class_code"j"	XLOC_000192	SDHAF4	3	1	56994903	57009831	+
TCONS_00000573	class_code"="	XLOC_000192	SDHAF4	4	1	56994903	57011303	+
TCONS_00000574	class_code"j"	XLOC_000192	SDHAF4	5	1	56994903	57015398	+
TCONS_00000575	class_code"j"	XLOC_000192	SDHAF4	5	1	56994903	57017803	+
TCONS_00000576	class_code"j"	XLOC_000192	SDHAF4	3	1	56995036	57004922	+
TCONS_00000577	class_code"="	XLOC_000192	SDHAF4	4	1	56995036	57010628	+
TCONS_00000578	class_code"u"	XLOC_000192		1	1	57014177	57015851	+
TCONS_00000579	class_code"u"	XLOC_000192		1	1	57016458	57018111	+
TCONS_00000580	class_code"j"	XLOC_000193	SMAP1	3	1	57055239	57186874	+
TCONS_00000581	class_code"j"	XLOC_000193	SMAP1	11	1	57055239	57281099	+
TCONS_00000582	class_code"="	XLOC_000193	SMAP1	10	1	57055239	57281099	+
TCONS_00000583	class_code"j"	XLOC_000193	SMAP1	8	1	57195352	57281099	+
TCONS_00000584	class_code"="	XLOC_000194	OGFRL1	7	1	57650075	57663843	+
TCONS_00000585	class_code"j"	XLOC_000194	OGFRL1	7	1	57650075	57672277	+
TCONS_00000586	class_code"j"	XLOC_000194	OGFRL1	7	1	57653922	57672277	+
TCONS_00000587	class_code"j"	XLOC_000194	OGFRL1	2	1	57661649	57672277	+
TCONS_00000588	class_code"j"	XLOC_000195	RIMS1	27	1	58125320	58437273	+
TCONS_00000589	class_code"j"	XLOC_000195	RIMS1	32	1	58125320	58462891	+
TCONS_00000590	class_code"j"	XLOC_000195	RIMS1	42	1	58125320	58584805	+
TCONS_00000591	class_code"j"	XLOC_000195	RIMS1	44	1	58125320	58584805	+
TCONS_00000592	class_code"="	XLOC_000196	U6	38	1	58326934	58517898	+
TCONS_00000593	class_code"j"	XLOC_000195	RIMS1	43	1	58326934	58584805	+
TCONS_00000594	class_code"j"	XLOC_000195	RIMS1	42	1	58326934	58584805	+
TCONS_00000595	class_code"j"	XLOC_000195	RIMS1	43	1	58326934	58584805	+
TCONS_00000596	class_code"="	XLOC_000195	RIMS1	24	1	58375713	58437273	+
TCONS_00000597	class_code"j"	XLOC_000195	RIMS1	26	1	58408064	58584805	+
TCONS_00000598	class_code"j"	XLOC_000195	RIMS1	12	1	58431569	58517898	+
TCONS_00000599	class_code"j"	XLOC_000195	RIMS1	17	1	58431569	58584805	+
TCONS_00000600	class_code"j"	XLOC_000195	RIMS1	2	1	58437873	58441380	+
TCONS_00000601	class_code"j"	XLOC_000195	RIMS1	11	1	58456985	58584805	+
TCONS_00000602	class_code"j"	XLOC_000195	RIMS1	12	1	58456985	58584805	+
TCONS_00000603	class_code"j"	XLOC_000195	RIMS1	5	1	58467561	58517898	+
TCONS_00000604	class_code"j"	XLOC_000195	RIMS1	9	1	58472682	58584805	+
TCONS_00000605	class_code"j"	XLOC_000195	RIMS1	9	1	58477980	58584805	+
TCONS_00000606	class_code"j"	XLOC_000195	RIMS1	1	1	58282135	58282242	+
TCONS_00000607	class_code"u"	XLOC_000197		1	1	58771502	58801350	+
TCONS_00000608	class_code"u"	XLOC_000197		3	1	58771671	58801349	+
TCONS_00000609	class_code"u"	XLOC_000197		2	1	58771671	58801349	+
TCONS_00000610	class_code"u"	XLOC_000197		3	1	58771723	58801349	+
TCONS_00000611	class_code"u"	XLOC_000197		3	1	58771723	58848799	+
TCONS_00000612	class_code"j"	XLOC_000197	KCNQ5	15	1	58771723	59278083	+
TCONS_00000613	class_code"j"	XLOC_000197	KCNQ5	15	1	58784014	59278083	+
TCONS_00000614	class_code"u"	XLOC_000197		1	1	58801461	58905587	+
TCONS_00000615	class_code"u"	XLOC_000197		1	1	58848854	58905586	+
TCONS_00000616	class_code"j"	XLOC_000197	KCNQ5	14	1	58884553	59278083	+
TCONS_00000617	class_code"j"	XLOC_000197	KCNQ5	8	1	58887815	59203179	+
TCONS_00000618	class_code"u"	XLOC_000197		1	1	59018258	59045077	+
TCONS_00000619	class_code"u"	XLOC_000197		1	1	59028950	59044307	+
TCONS_00000620	class_code"j"	XLOC_000197	KCNQ5	13	1	59038411	59278083	+
TCONS_00000621	class_code"u"	XLOC_000197		1	1	59044365	59045077	+
TCONS_00000622	class_code"u"	XLOC_000197		1	1	59069834	59081985	+
TCONS_00000623	class_code"u"	XLOC_000197		1	1	59090321	59092326	+
TCONS_00000624	class_code"j"	XLOC_000197	KCNQ5	8	1	59090321	59203179	+
TCONS_00000625	class_code"j"	XLOC_000197	KCNQ5	13	1	59090321	59278083	+
TCONS_00000626	class_code"j"	XLOC_000197	KCNQ5	14	1	59090975	59278083	+
TCONS_00000627	class_code"j"	XLOC_000197	KCNQ5	15	1	59092539	59278083	+
TCONS_00000628	class_code"="	XLOC_000197	KCNQ5	13	1	59101857	59277108	+
TCONS_00000629	class_code"j"	XLOC_000197	KCNQ5	14	1	59101857	59278083	+
TCONS_00000630	class_code"="	XLOC_000197	KCNQ5	11	1	59137410	59277108	+
TCONS_00000631	class_code"="	XLOC_000197	KCNQ5	13	1	59137410	59277108	+
TCONS_00000632	class_code"="	XLOC_000198	ENSSSCG00000004284	2	1	59332572	59332984	+
TCONS_00000633	class_code"="	XLOC_000199	DDX43	16	1	59356081	59414361	+
TCONS_00000634	class_code"="	XLOC_000200	ENSSSCG00000028526	9	1	59472959	59531027	+
TCONS_00000635	class_code"="	XLOC_000201	MRAP2	4	1	59586282	59648531	+
TCONS_00000636	class_code"j"	XLOC_000201	MRAP2	3	1	59591696	59648531	+
TCONS_00000637	class_code"="	XLOC_000202	NT5E	9	1	60831592	60884602	+
TCONS_00000638	class_code"="	XLOC_000202	NT5E	4	1	60831749	60856273	+
TCONS_00000639	class_code"j"	XLOC_000202	NT5E	8	1	60831749	60884602	+
TCONS_00000640	class_code"j"	XLOC_000202	NT5E	8	1	60831749	60884602	+
TCONS_00000641	class_code"="	XLOC_000202	NT5E	9	1	60831844	60879526	+
TCONS_00000642	class_code"="	XLOC_000202	NT5E	2	1	60870376	60879524	+
TCONS_00000643	class_code"="	XLOC_000203	SNORD22	1	1	61780960	61781086	+
TCONS_00000644	class_code"="	XLOC_000204	ENSSSCG00000004296	2	1	62186023	62186947	+
TCONS_00000645	class_code"j"	XLOC_000205	ZNF292	12	1	62309594	62416873	+
TCONS_00000646	class_code"j"	XLOC_000205	ZNF292	12	1	62309594	62416873	+
TCONS_00000647	class_code"j"	XLOC_000205	ZNF292	12	1	62311670	62416873	+
TCONS_00000648	class_code"="	XLOC_000205	ZNF292	18	1	62311690	62403839	+
TCONS_00000649	class_code"j"	XLOC_000205	ZNF292	4	1	62387824	62416873	+
TCONS_00000650	class_code"j"	XLOC_000205	ZNF292	4	1	62387824	62416873	+
TCONS_00000651	class_code"j"	XLOC_000205	ZNF292	4	1	62387866	62416873	+
TCONS_00000652	class_code"="	XLOC_000206	SMIM8	3	1	62447062	62459491	+
TCONS_00000653	class_code"j"	XLOC_000206	C6orf163	7	1	62447062	62482888	+
TCONS_00000654	class_code"j"	XLOC_000206	C6orf163	7	1	62447062	62482888	+
TCONS_00000655	class_code"="	XLOC_000206	SMIM8	3	1	62447068	62456156	+
TCONS_00000656	class_code"j"	XLOC_000206	SMIM8	3	1	62447068	62459491	+
TCONS_00000657	class_code"="	XLOC_000206	C6orf163	5	1	62458925	62481489	+
TCONS_00000658	class_code"j"	XLOC_000206	C6orf163	3	1	62459640	62472520	+
TCONS_00000659	class_code"j"	XLOC_000206	C6orf163	3	1	62459640	62482888	+
TCONS_00000660	class_code"j"	XLOC_000206	C6orf163	3	1	62459640	62482888	+
TCONS_00000661	class_code"="	XLOC_000207	ENSSSCG00000004302	12	1	62517228	62545844	+
TCONS_00000662	class_code"j"	XLOC_000208	SLC35A1	8	1	62552918	62588854	+
TCONS_00000663	class_code"j"	XLOC_000208	SLC35A1	7	1	62552920	62588854	+
TCONS_00000664	class_code"j"	XLOC_000208	SLC35A1	6	1	62553129	62585899	+
TCONS_00000665	class_code"j"	XLOC_000208	SLC35A1	7	1	62553136	62585899	+
TCONS_00000666	class_code"j"	XLOC_000208	SLC35A1	7	1	62553155	62588854	+
TCONS_00000667	class_code"="	XLOC_000208	SLC35A1	7	1	62558688	62588854	+
TCONS_00000668	class_code"="	XLOC_000209	ENSSSCG00000004303	16	1	62592097	62635359	+
TCONS_00000669	class_code"="	XLOC_000209	ENSSSCG00000004303	16	1	62592224	62632442	+
TCONS_00000670	class_code"j"	XLOC_000209	ENSSSCG00000004303	16	1	62592224	62635359	+
TCONS_00000671	class_code"j"	XLOC_000209	ENSSSCG00000004303	15	1	62592224	62635359	+
TCONS_00000672	class_code"j"	XLOC_000209	ENSSSCG00000004303	12	1	62618620	62635359	+
TCONS_00000673	class_code"j"	XLOC_000210	ORC3	18	1	62675273	62788712	+
TCONS_00000674	class_code"j"	XLOC_000210	ORC3	17	1	62675310	62732777	+
TCONS_00000675	class_code"="	XLOC_000210	ORC3	20	1	62675310	62787986	+
TCONS_00000676	class_code"j"	XLOC_000210	ORC3	19	1	62675310	62788712	+
TCONS_00000677	class_code"j"	XLOC_000210	ORC3	20	1	62675310	62788712	+
TCONS_00000678	class_code"j"	XLOC_000210	ORC3	20	1	62675310	62788712	+
TCONS_00000679	class_code"j"	XLOC_000210	ORC3	19	1	62675310	62788712	+
TCONS_00000680	class_code"j"	XLOC_000210	ORC3	18	1	62675310	62788712	+
TCONS_00000681	class_code"="	XLOC_000211	SPACA1	7	1	63112645	63130057	+
TCONS_00000682	class_code"="	XLOC_000212	ENSSSCG00000029003	1	1	63408778	63409509	+
TCONS_00000683	class_code"j"	XLOC_000213	SRSF12	2	1	63800571	63811532	+
TCONS_00000684	class_code"="	XLOC_000213	SRSF12	4	1	63802469	63810641	+
TCONS_00000685	class_code"="	XLOC_000213	SRSF12	4	1	63802469	63811532	+
TCONS_00000686	class_code"j"	XLOC_000214	PM20D2	10	1	63928274	63999467	+
TCONS_00000687	class_code"u"	XLOC_000214		1	1	63958197	63965330	+
TCONS_00000688	class_code"j"	XLOC_000214	PM20D2	8	1	63963303	63999467	+
TCONS_00000689	class_code"j"	XLOC_000214	PM20D2	7	1	63963339	63999467	+
TCONS_00000690	class_code"="	XLOC_000214	PM20D2	8	1	63963339	63999467	+
TCONS_00000691	class_code"j"	XLOC_000214	PM20D2	6	1	63965983	63999467	+
TCONS_00000692	class_code"="	XLOC_000214	PM20D2	7	1	63966007	63991682	+
TCONS_00000693	class_code"="	XLOC_000215	U6	1	1	64257022	64261012	+
TCONS_00000694	class_code"="	XLOC_000215	U6	1	1	64260254	64260361	+
TCONS_00000695	class_code"="	XLOC_000216	ANKRD6	12	1	64482242	64542235	+
TCONS_00000696	class_code"="	XLOC_000216	ANKRD6	14	1	64482242	64542250	+
TCONS_00000697	class_code"j"	XLOC_000216	ANKRD6	13	1	64482242	64542383	+
TCONS_00000698	class_code"j"	XLOC_000216	ANKRD6	13	1	64482242	64542383	+
TCONS_00000699	class_code"j"	XLOC_000216	ANKRD6	13	1	64482242	64542383	+
TCONS_00000700	class_code"="	XLOC_000217	ENSSSCG00000004327	2	1	64694704	64699367	+
TCONS_00000701	class_code"j"	XLOC_000218	CH242-196P17.1	7	1	64791175	64806842	+
TCONS_00000702	class_code"j"	XLOC_000218	CH242-196P17.1	9	1	64791175	64811487	+
TCONS_00000703	class_code"j"	XLOC_000218	CH242-196P17.1	6	1	64791795	64802922	+
TCONS_00000704	class_code"="	XLOC_000218	CH242-196P17.1	10	1	64791795	64811376	+
TCONS_00000705	class_code"="	XLOC_000219	GJA10	2	1	64826656	64828291	+
TCONS_00000706	class_code"="	XLOC_000220	MANEA	5	1	71027086	71081123	+
TCONS_00000707	class_code"j"	XLOC_000220	MANEA	4	1	71052234	71081123	+
TCONS_00000708	class_code"="	XLOC_000221	FUT9	1	1	71777164	71778250	+
TCONS_00000709	class_code"j"	XLOC_000222	UFL1	13	1	72007497	72040905	+
TCONS_00000710	class_code"j"	XLOC_000222	UFL1	19	1	72007497	72069331	+
TCONS_00000711	class_code"="	XLOC_000222	UFL1	18	1	72007497	72069331	+
TCONS_00000712	class_code"="	XLOC_000223	FHL5	6	1	72074661	72124271	+
TCONS_00000713	class_code"="	XLOC_000223	FHL5	6	1	72074767	72120937	+
TCONS_00000714	class_code"="	XLOC_000224	ENSSSCG00000028811	5	1	72448164	72577787	+
TCONS_00000715	class_code"="	XLOC_000225	ENSSSCG00000027002	5	1	72650786	72724325	+
TCONS_00000716	class_code"="	XLOC_000226	7SK	1	1	72856318	72856638	+
TCONS_00000717	class_code"="	XLOC_000227	ENSSSCG00000004345	6	1	72880268	72893507	+
TCONS_00000718	class_code"="	XLOC_000228	7SK	1	1	72942201	72942521	+
TCONS_00000719	class_code"="	XLOC_000229	ENSSSCG00000019812	1	1	73712921	73713012	+
TCONS_00000720	class_code"="	XLOC_000230	POU3F2	1	1	74386222	74387551	+
TCONS_00000721	class_code"j"	XLOC_000231	ENSSSCG00000004349	3	1	74964825	74973352	+
TCONS_00000722	class_code"="	XLOC_000231	ENSSSCG00000004349	4	1	74964825	74975615	+
TCONS_00000723	class_code"="	XLOC_000232	ENSSSCG00000023154	4	1	74987377	75016519	+
TCONS_00000724	class_code"j"	XLOC_000232	ENSSSCG00000023154	5	1	74987395	75016519	+
TCONS_00000725	class_code"="	XLOC_000233	ENSSSCG00000029638	4	1	75136591	75146401	+
TCONS_00000726	class_code"="	XLOC_000233	ENSSSCG00000029638	4	1	75136678	75144534	+
TCONS_00000727	class_code"="	XLOC_000234	PRDM13	6	1	75215374	75222876	+
TCONS_00000728	class_code"="	XLOC_000235	5S_rRNA	1	1	76147917	76148035	+
TCONS_00000729	class_code"u"	XLOC_000236		1	1	76169351	76171008	+
TCONS_00000730	class_code"="	XLOC_000237	ENSSSCG00000024589	2	1	76349198	76355546	+
TCONS_00000731	class_code"j"	XLOC_000238	ENSSSCG00000021300	3	1	76437125	76465358	+
TCONS_00000732	class_code"="	XLOC_000238	ENSSSCG00000021300	2	1	76437572	76462144	+
TCONS_00000733	class_code"j"	XLOC_000239	GRIK2	20	1	76878583	77554767	+
TCONS_00000734	class_code"j"	XLOC_000239	GRIK2	19	1	76878583	77554767	+
TCONS_00000735	class_code"j"	XLOC_000239	GRIK2	20	1	76878631	77554767	+
TCONS_00000736	class_code"="	XLOC_000239	ENSSSCG00000029152	1	1	76884182	76884356	+
TCONS_00000737	class_code"j"	XLOC_000239	GRIK2	5	1	77113352	77164921	+
TCONS_00000738	class_code"="	XLOC_000239	GRIK2	17	1	77113352	77554395	+
TCONS_00000739	class_code"="	XLOC_000239	GRIK2	11	1	77113375	77439969	+
TCONS_00000740	class_code"="	XLOC_000239	GRIK2	5	1	77444046	77554767	+
TCONS_00000741	class_code"="	XLOC_000239	GRIK2	4	1	77521348	77554507	+
TCONS_00000742	class_code"="	XLOC_000239	GRIK2	3	1	77521348	77554699	+
TCONS_00000743	class_code"="	XLOC_000240	LIN28B	3	1	80445446	80615997	+
TCONS_00000744	class_code"u"	XLOC_000241		1	1	80681322	80699680	+
TCONS_00000745	class_code"x"	XLOC_000241	POPDC3	3	1	80681392	80757385	+
TCONS_00000746	class_code"u"	XLOC_000241		1	1	80696886	80699680	+
TCONS_00000747	class_code"x"	XLOC_000242	ENSSSCG00000004368	2	1	80833657	80837641	+
TCONS_00000748	class_code"="	XLOC_000243	ENSSSCG00000004369	7	1	81577473	81601278	+
TCONS_00000749	class_code"j"	XLOC_000243	ENSSSCG00000004369	5	1	81586102	81601278	+
TCONS_00000750	class_code"u"	XLOC_000244		3	1	81721570	81746936	+
TCONS_00000751	class_code"="	XLOC_000245	ENSSSCG00000004371	20	1	81996298	82061659	+
TCONS_00000752	class_code"j"	XLOC_000245	ENSSSCG00000004371	21	1	81996298	82063767	+
TCONS_00000753	class_code"="	XLOC_000245	ENSSSCG00000004371	20	1	81996527	82061659	+
TCONS_00000754	class_code"="	XLOC_000245	ENSSSCG00000004371	2	1	81997179	82003159	+
TCONS_00000755	class_code"="	XLOC_000245	ENSSSCG00000004371	5	1	82003267	82014707	+
TCONS_00000756	class_code"="	XLOC_000245	ENSSSCG00000004371	20	1	82004205	82061659	+
TCONS_00000757	class_code"="	XLOC_000245	ENSSSCG00000004371	12	1	82029757	82052797	+
TCONS_00000758	class_code"="	XLOC_000245	ENSSSCG00000004371	1	1	82058909	82063767	+
TCONS_00000759	class_code"="	XLOC_000245	ENSSSCG00000004371	1	1	82059360	82060063	+
TCONS_00000760	class_code"="	XLOC_000246	ENSSSCG00000004374	11	1	82112108	82145844	+
TCONS_00000761	class_code"="	XLOC_000247	ENSSSCG00000031023	2	1	82268708	82273291	+
TCONS_00000762	class_code"u"	XLOC_000248		1	1	82717261	82725643	+
TCONS_00000763	class_code"u"	XLOC_000248		2	1	82717261	82738866	+
TCONS_00000764	class_code"u"	XLOC_000248		1	1	82726102	82738866	+
TCONS_00000765	class_code"u"	XLOC_000249		2	1	82738931	82749025	+
TCONS_00000766	class_code"u"	XLOC_000250		3	1	82785580	82807530	+
TCONS_00000767	class_code"j"	XLOC_000250	SOBP	6	1	82785580	82948404	+
TCONS_00000768	class_code"j"	XLOC_000250	SOBP	7	1	82785580	82948404	+
TCONS_00000769	class_code"j"	XLOC_000250	SOBP	7	1	82785580	82957360	+
TCONS_00000770	class_code"u"	XLOC_000250		4	1	82785581	82832924	+
TCONS_00000771	class_code"u"	XLOC_000250		5	1	82785581	82877390	+
TCONS_00000772	class_code"u"	XLOC_000250		2	1	82800782	82807530	+
TCONS_00000773	class_code"j"	XLOC_000250	SOBP	6	1	82801124	82948404	+
TCONS_00000774	class_code"j"	XLOC_000250	SOBP	4	1	82829652	82948404	+
TCONS_00000775	class_code"u"	XLOC_000250		1	1	82872779	82879346	+
TCONS_00000776	class_code"="	XLOC_000250	SOBP	3	1	82935421	82938203	+
TCONS_00000777	class_code"="	XLOC_000250	SOBP	3	1	82935421	82948404	+
TCONS_00000778	class_code"u"	XLOC_000250		1	1	82948872	82957286	+
TCONS_00000779	class_code"="	XLOC_000251	ENSSSCG00000004380	3	1	83109164	83124404	+
TCONS_00000780	class_code"="	XLOC_000251	ENSSSCG00000004380	3	1	83109164	83125235	+
TCONS_00000781	class_code"="	XLOC_000252	NR2E1	9	1	83541306	83562994	+
TCONS_00000782	class_code"="	XLOC_000252	NR2E1	9	1	83543257	83562994	+
TCONS_00000783	class_code"="	XLOC_000253	ENSSSCG00000024176	3	1	83634962	83688823	+
TCONS_00000784	class_code"="	XLOC_000253	ENSSSCG00000024176	3	1	83635061	83687911	+
TCONS_00000785	class_code"j"	XLOC_000254	ENSSSCG00000004386	9	1	83698778	83849739	+
TCONS_00000786	class_code"j"	XLOC_000254	ENSSSCG00000004386	6	1	83698854	83804988	+
TCONS_00000787	class_code"="	XLOC_000254	ENSSSCG00000004386	7	1	83698854	83827538	+
TCONS_00000788	class_code"j"	XLOC_000254	ENSSSCG00000004386	10	1	83698854	83849739	+
TCONS_00000789	class_code"j"	XLOC_000254	ENSSSCG00000004386	11	1	83698854	83849739	+
TCONS_00000790	class_code"j"	XLOC_000254	ENSSSCG00000004386	8	1	83698854	83849739	+
TCONS_00000791	class_code"u"	XLOC_000254		3	1	83837029	83849739	+
TCONS_00000792	class_code"u"	XLOC_000254		2	1	83843996	83849739	+
TCONS_00000793	class_code"j"	XLOC_000255	FOXO3	4	1	83885140	84073976	+
TCONS_00000794	class_code"j"	XLOC_000255	FOXO3	4	1	83886562	84073976	+
TCONS_00000795	class_code"="	XLOC_000255	FOXO3	3	1	83886631	84048935	+
TCONS_00000796	class_code"j"	XLOC_000255	FOXO3	4	1	83887802	84073976	+
TCONS_00000797	class_code"u"	XLOC_000255		1	1	84062008	84079549	+
TCONS_00000798	class_code"u"	XLOC_000256		1	1	84079691	84084921	+
TCONS_00000799	class_code"u"	XLOC_000256		2	1	84079691	84099128	+
TCONS_00000800	class_code"u"	XLOC_000256		3	1	84083228	84105561	+
TCONS_00000801	class_code"="	XLOC_000257	ARMC2	25	1	84234296	84342178	+
TCONS_00000802	class_code"="	XLOC_000257	ARMC2	25	1	84234296	84342855	+
TCONS_00000803	class_code"j"	XLOC_000258	CEP57L1	9	1	84465037	84561622	+
TCONS_00000804	class_code"u"	XLOC_000258		1	1	84465044	84469238	+
TCONS_00000805	class_code"j"	XLOC_000258	CEP57L1	10	1	84465044	84558108	+
TCONS_00000806	class_code"j"	XLOC_000258	CEP57L1	11	1	84465044	84561622	+
TCONS_00000807	class_code"j"	XLOC_000258	CEP57L1	10	1	84465051	84558108	+
TCONS_00000808	class_code"o"	XLOC_000258	CEP57L1	4	1	84465051	84569550	+
TCONS_00000809	class_code"j"	XLOC_000258	CEP57L1	11	1	84465053	84561622	+
TCONS_00000810	class_code"j"	XLOC_000258	CEP57L1	13	1	84465053	84569550	+
TCONS_00000811	class_code"j"	XLOC_000258	CEP57L1	12	1	84465071	84569550	+
TCONS_00000812	class_code"j"	XLOC_000258	CEP57L1	11	1	84465083	84561622	+
TCONS_00000813	class_code"j"	XLOC_000258	CEP57L1	13	1	84465083	84569550	+
TCONS_00000814	class_code"j"	XLOC_000258	CEP57L1	10	1	84502214	84558108	+
TCONS_00000815	class_code"="	XLOC_000258	CEP57L1	9	1	84502214	84559202	+
TCONS_00000816	class_code"="	XLOC_000258	CEP57L1	10	1	84502214	84559202	+
TCONS_00000817	class_code"="	XLOC_000258	CEP57L1	9	1	84502214	84561622	+
TCONS_00000818	class_code"j"	XLOC_000258	CEP57L1	10	1	84502214	84561622	+
TCONS_00000819	class_code"="	XLOC_000258	CEP57L1	10	1	84502214	84561622	+
TCONS_00000820	class_code"j"	XLOC_000258	CEP57L1	2	1	84556426	84561622	+
TCONS_00000821	class_code"u"	XLOC_000258		3	1	84560324	84569550	+
TCONS_00000822	class_code"u"	XLOC_000258		1	1	84563429	84569550	+
TCONS_00000823	class_code"j"	XLOC_000259	ENSSSCG00000030406	7	1	84598720	84619634	+
TCONS_00000824	class_code"j"	XLOC_000259	ENSSSCG00000030406	10	1	84598720	84622404	+
TCONS_00000825	class_code"j"	XLOC_000259	ENSSSCG00000030406	10	1	84598996	84622404	+
TCONS_00000826	class_code"="	XLOC_000259	ENSSSCG00000030406	10	1	84598998	84622404	+
TCONS_00000827	class_code"j"	XLOC_000260	ENSSSCG00000004415	19	1	84644861	84708053	+
TCONS_00000828	class_code"="	XLOC_000260	ENSSSCG00000004415	20	1	84644861	84709541	+
TCONS_00000829	class_code"j"	XLOC_000260	ENSSSCG00000004415	18	1	84644861	84719503	+
TCONS_00000830	class_code"j"	XLOC_000260	ENSSSCG00000004415	19	1	84644861	84719503	+
TCONS_00000831	class_code"j"	XLOC_000260	ENSSSCG00000004415	17	1	84644861	84719503	+
TCONS_00000832	class_code"j"	XLOC_000260	ENSSSCG00000004415	17	1	84644861	84719503	+
TCONS_00000833	class_code"j"	XLOC_000260	ENSSSCG00000004415	11	1	84670717	84719503	+
TCONS_00000834	class_code"j"	XLOC_000260	ENSSSCG00000004415	12	1	84670935	84719503	+
TCONS_00000835	class_code"j"	XLOC_000260	ENSSSCG00000004415	10	1	84670936	84719503	+
TCONS_00000836	class_code"j"	XLOC_000261	SMPD2	10	1	84786302	84791307	+
TCONS_00000837	class_code"="	XLOC_000261	SMPD2	9	1	84786302	84791307	+
TCONS_00000838	class_code"j"	XLOC_000261	SMPD2	9	1	84786303	84791307	+
TCONS_00000839	class_code"="	XLOC_000261	SMPD2	10	1	84786671	84789541	+
TCONS_00000840	class_code"="	XLOC_000262	ENSSSCG00000020960	2	1	84928988	84930959	+
TCONS_00000841	class_code"="	XLOC_000263	ENSSSCG00000022201	4	1	84995885	85028708	+
TCONS_00000842	class_code"="	XLOC_000263	ENSSSCG00000022201	4	1	84995888	85028015	+
TCONS_00000843	class_code"j"	XLOC_000264	CDC40	16	1	85660666	85715122	+
TCONS_00000844	class_code"j"	XLOC_000264	CDC40	10	1	85660856	85702009	+
TCONS_00000845	class_code"="	XLOC_000264	CDC40	15	1	85660856	85714991	+
TCONS_00000846	class_code"j"	XLOC_000265	SLC22A16	8	1	86021400	86064420	+
TCONS_00000847	class_code"j"	XLOC_000265	SLC22A16	8	1	86021476	86064420	+
TCONS_00000848	class_code"="	XLOC_000265	SLC22A16	7	1	86038180	86064050	+
TCONS_00000849	class_code"j"	XLOC_000266	ENSSSCG00000004395	7	1	86114845	86230346	+
TCONS_00000850	class_code"u"	XLOC_000266		2	1	86117057	86119346	+
TCONS_00000851	class_code"="	XLOC_000266	ENSSSCG00000004395	4	1	86210910	86230305	+
TCONS_00000852	class_code"u"	XLOC_000267		1	1	86506441	86517475	+
TCONS_00000853	class_code"u"	XLOC_000267		2	1	86512801	86525195	+
TCONS_00000854	class_code"u"	XLOC_000267		1	1	86517851	86525195	+
TCONS_00000855	class_code"j"	XLOC_000268	ENSSSCG00000025703	5	1	86576835	86593799	+
TCONS_00000856	class_code"j"	XLOC_000268	ENSSSCG00000025703	14	1	86576835	86642184	+
TCONS_00000857	class_code"j"	XLOC_000268	ENSSSCG00000025703	15	1	86576835	86651100	+
TCONS_00000858	class_code"="	XLOC_000268	ENSSSCG00000025703	16	1	86576989	86650762	+
TCONS_00000859	class_code"x"	XLOC_000269	ENSSSCG00000025439	2	1	86940793	86961245	+
TCONS_00000860	class_code"x"	XLOC_000269	ENSSSCG00000025439	3	1	86940793	87037695	+
TCONS_00000861	class_code"x"	XLOC_000269	ENSSSCG00000025439	2	1	86940818	86961245	+
TCONS_00000862	class_code"u"	XLOC_000269		2	1	86950337	86961245	+
TCONS_00000863	class_code"u"	XLOC_000270		3	1	86999282	87037695	+
TCONS_00000864	class_code"u"	XLOC_000270		3	1	87020088	87037695	+
TCONS_00000865	class_code"u"	XLOC_000270		1	1	86961467	86997230	+
TCONS_00000866	class_code"u"	XLOC_000269		2	1	86961469	86997230	+
TCONS_00000867	class_code"u"	XLOC_000269		2	1	86961479	86997230	+
TCONS_00000868	class_code"x"	XLOC_000271	TRAF3IP2	2	1	87100609	87106552	+
TCONS_00000869	class_code"x"	XLOC_000272	FYN	2	1	87148099	87158114	+
TCONS_00000870	class_code"="	XLOC_000273	U6	1	1	87653594	87653701	+
TCONS_00000871	class_code"="	XLOC_000274	WISP3	5	1	87674778	87686903	+
TCONS_00000872	class_code"="	XLOC_000275	FAM229B	2	1	87730313	87732085	+
TCONS_00000873	class_code"="	XLOC_000276	RFPL4B	3	1	88131678	88134311	+
TCONS_00000874	class_code"="	XLOC_000276	RFPL4B	3	1	88133501	88134607	+
TCONS_00000875	class_code"j"	XLOC_000277	ENSSSCG00000023610	2	1	89851191	89857552	+
TCONS_00000876	class_code"="	XLOC_000277	ENSSSCG00000023610	3	1	89851191	89857552	+
TCONS_00000877	class_code"="	XLOC_000278	NT5DC1	12	1	91861518	91997751	+
TCONS_00000878	class_code"="	XLOC_000278	NT5DC1	12	1	91861568	91997370	+
TCONS_00000879	class_code"="	XLOC_000279	ENSSSCG00000004445	2	1	92373294	92377185	+
TCONS_00000880	class_code"j"	XLOC_000280	RWDD1	8	1	92384850	92403441	+
TCONS_00000881	class_code"="	XLOC_000280	RWDD1	7	1	92384870	92403435	+
TCONS_00000882	class_code"="	XLOC_000281	ENSSSCG00000025656	7	1	92480305	92502383	+
TCONS_00000883	class_code"j"	XLOC_000282	SNAP91	29	1	92790548	92949976	+
TCONS_00000884	class_code"="	XLOC_000282	SNAP91	27	1	92839195	92949976	+
TCONS_00000885	class_code"j"	XLOC_000283	ME1	14	1	93051386	93242655	+
TCONS_00000886	class_code"="	XLOC_000283	ME1	14	1	93076562	93242655	+
TCONS_00000887	class_code"j"	XLOC_000284	PGM3	8	1	93255136	93273765	+
TCONS_00000888	class_code"j"	XLOC_000284	PGM3	9	1	93255136	93274744	+
TCONS_00000889	class_code"j"	XLOC_000284	PGM3	9	1	93255136	93274744	+
TCONS_00000890	class_code"j"	XLOC_000284	PGM3	13	1	93255136	93282235	+
TCONS_00000891	class_code"j"	XLOC_000284	PGM3	13	1	93255136	93282235	+
TCONS_00000892	class_code"="	XLOC_000284	PGM3	13	1	93255136	93282235	+
TCONS_00000893	class_code"="	XLOC_000285	ENSSSCG00000026346	5	1	93442896	93476003	+
TCONS_00000894	class_code"="	XLOC_000285	ENSSSCG00000026346	5	1	93443036	93474584	+
TCONS_00000895	class_code"j"	XLOC_000286	IBTK	28	1	94512002	94611293	+
TCONS_00000896	class_code"="	XLOC_000286	IBTK	29	1	94512355	94609937	+
TCONS_00000897	class_code"j"	XLOC_000286	IBTK	29	1	94512355	94611293	+
TCONS_00000898	class_code"j"	XLOC_000286	IBTK	28	1	94512355	94611293	+
TCONS_00000899	class_code"j"	XLOC_000286	IBTK	28	1	94512355	94611293	+
TCONS_00000900	class_code"="	XLOC_000286	IBTK	29	1	94512355	94611293	+
TCONS_00000901	class_code"j"	XLOC_000287	FAM46A	3	1	95103222	95111487	+
TCONS_00000902	class_code"="	XLOC_000287	FAM46A	3	1	95104352	95109056	+
TCONS_00000903	class_code"j"	XLOC_000287	FAM46A	3	1	95104352	95111487	+
TCONS_00000904	class_code"="	XLOC_000288	ENSSSCG00000023645	1	1	95714584	95714665	+
TCONS_00000905	class_code"="	XLOC_000289	ENSSSCG00000026384	2	1	96425073	96526987	+
TCONS_00000906	class_code"="	XLOC_000290	ENSSSCG00000028080	5	1	96888320	96897944	+
TCONS_00000907	class_code"="	XLOC_000291	LCA5	7	1	97325675	97381517	+
TCONS_00000908	class_code"j"	XLOC_000292	ENSSSCG00000004470	6	1	97725600	97760509	+
TCONS_00000909	class_code"j"	XLOC_000292	ENSSSCG00000004470	7	1	97725600	97760509	+
TCONS_00000910	class_code"j"	XLOC_000292	ENSSSCG00000004470	6	1	97725890	97760509	+
TCONS_00000911	class_code"="	XLOC_000292	ENSSSCG00000004470	6	1	97745078	97758955	+
TCONS_00000912	class_code"j"	XLOC_000292	ENSSSCG00000004470	7	1	97745078	97760509	+
TCONS_00000913	class_code"j"	XLOC_000293	ENSSSCG00000004473	9	1	97888473	97944514	+
TCONS_00000914	class_code"j"	XLOC_000293	ENSSSCG00000004473	16	1	97888473	97965671	+
TCONS_00000915	class_code"j"	XLOC_000293	ENSSSCG00000004473	17	1	97888473	97965671	+
TCONS_00000916	class_code"j"	XLOC_000293	ENSSSCG00000004473	45	1	97888473	98015310	+
TCONS_00000917	class_code"j"	XLOC_000293	ENSSSCG00000004473	44	1	97888473	98015310	+
TCONS_00000918	class_code"="	XLOC_000293	ENSSSCG00000004473	45	1	97888854	98015310	+
TCONS_00000919	class_code"j"	XLOC_000293	ENSSSCG00000004473	41	1	97905733	98015310	+
TCONS_00000920	class_code"j"	XLOC_000293	ENSSSCG00000004473	39	1	97923844	98015310	+
TCONS_00000921	class_code"j"	XLOC_000293	ENSSSCG00000004473	23	1	97968687	98015310	+
TCONS_00000922	class_code"="	XLOC_000294	HTR1B	1	1	99465591	99466764	+
TCONS_00000923	class_code"="	XLOC_000294	HTR1B	1	1	99465591	99467472	+
TCONS_00000924	class_code"="	XLOC_000295	IMPG1	25	1	100869646	100947711	+
TCONS_00000925	class_code"="	XLOC_000295	IMPG1	25	1	100870479	100966064	+
TCONS_00000926	class_code"="	XLOC_000295	IMPG1	5	1	100875545	100881925	+
TCONS_00000927	class_code"="	XLOC_000296	ENSSSCG00000028780	4	1	101246670	101274340	+
TCONS_00000928	class_code"j"	XLOC_000296	ENSSSCG00000028780	5	1	101246733	101274340	+
TCONS_00000929	class_code"="	XLOC_000296	ENSSSCG00000028780	4	1	101247377	101262467	+
TCONS_00000930	class_code"j"	XLOC_000296	ENSSSCG00000028780	3	1	101249065	101274340	+
TCONS_00000931	class_code"j"	XLOC_000296	ENSSSCG00000028780	2	1	101253721	101274340	+
TCONS_00000932	class_code"="	XLOC_000296	U6	1	1	101273214	101273312	+
TCONS_00000933	class_code"="	XLOC_000297	FILIP1	5	1	101561276	101640546	+
TCONS_00000934	class_code"j"	XLOC_000297	FILIP1	6	1	101561276	101642542	+
TCONS_00000935	class_code"j"	XLOC_000297	FILIP1	6	1	101561276	101651483	+
TCONS_00000936	class_code"="	XLOC_000297	FILIP1	5	1	101579215	101635016	+
TCONS_00000937	class_code"j"	XLOC_000297	FILIP1	6	1	101579215	101651483	+
TCONS_00000938	class_code"u"	XLOC_000297		1	1	101641176	101642542	+
TCONS_00000939	class_code"u"	XLOC_000297		1	1	101649476	101651483	+
TCONS_00000940	class_code"u"	XLOC_000298		1	1	101673870	101688798	+
TCONS_00000941	class_code"u"	XLOC_000298		2	1	101673870	101692386	+
TCONS_00000942	class_code"u"	XLOC_000298		1	1	101689737	101692386	+
TCONS_00000943	class_code"j"	XLOC_000299	ENSSSCG00000004484	52	1	101692547	101890877	+
TCONS_00000944	class_code"j"	XLOC_000299	ENSSSCG00000004484	52	1	101692772	101890877	+
TCONS_00000945	class_code"="	XLOC_000299	ENSSSCG00000030275	4	1	101694401	101698341	+
TCONS_00000946	class_code"="	XLOC_000300	U6	29	1	101726687	101890065	+
TCONS_00000947	class_code"="	XLOC_000299	ENSSSCG00000004484	1	1	101701921	101702025	+
TCONS_00000948	class_code"="	XLOC_000301	SLC17A5	11	1	103338140	103394056	+
TCONS_00000949	class_code"j"	XLOC_000301	SLC17A5	11	1	103338140	103394095	+
TCONS_00000950	class_code"j"	XLOC_000301	SLC17A5	11	1	103338140	103394095	+
TCONS_00000951	class_code"j"	XLOC_000302	ENSSSCG00000004489	7	1	103474491	103477893	+
TCONS_00000952	class_code"="	XLOC_000302	ENSSSCG00000004489	8	1	103474790	103477893	+
TCONS_00000953	class_code"="	XLOC_000303	MB21D1	5	1	103535848	103557331	+
TCONS_00000954	class_code"u"	XLOC_000304		1	1	104033599	104074364	+
TCONS_00000955	class_code"u"	XLOC_000304		2	1	104049440	104074360	+
TCONS_00000956	class_code"j"	XLOC_000305	SETBP1	3	1	104302837	104446000	+
TCONS_00000957	class_code"j"	XLOC_000305	SETBP1	3	1	104302837	104482573	+
TCONS_00000958	class_code"j"	XLOC_000305	SETBP1	4	1	104302837	104511795	+
TCONS_00000959	class_code"j"	XLOC_000305	SETBP1	5	1	104302845	104511795	+
TCONS_00000960	class_code"="	XLOC_000305	SETBP1	3	1	104402848	104507001	+
TCONS_00000961	class_code"="	XLOC_000306	7SK	1	1	104994546	104994849	+
TCONS_00000962	class_code"="	XLOC_000307	SLC14A2	19	1	105323435	105382354	+
TCONS_00000963	class_code"="	XLOC_000308	SLC14A1	10	1	105418611	105444533	+
TCONS_00000964	class_code"="	XLOC_000309	SIGLEC15	4	1	105543763	105549486	+
TCONS_00000965	class_code"="	XLOC_000310	ATP5A1	11	1	105944300	105955798	+
TCONS_00000966	class_code"j"	XLOC_000311	C18orf25	4	1	105987541	106085181	+
TCONS_00000967	class_code"j"	XLOC_000311	C18orf25	3	1	105987826	106040728	+
TCONS_00000968	class_code"j"	XLOC_000311	C18orf25	2	1	106025058	106045965	+
TCONS_00000969	class_code"j"	XLOC_000311	C18orf25	4	1	106025058	106085181	+
TCONS_00000970	class_code"="	XLOC_000311	C18orf25	3	1	106025058	106085181	+
TCONS_00000971	class_code"="	XLOC_000311	C18orf25	4	1	106025620	106074150	+
TCONS_00000972	class_code"j"	XLOC_000311	C18orf25	3	1	106042715	106085181	+
TCONS_00000973	class_code"="	XLOC_000312	ENSSSCG00000004501	1	1	106255216	106255579	+
TCONS_00000974	class_code"j"	XLOC_000313	CTIF	10	1	107666404	107985709	+
TCONS_00000975	class_code"j"	XLOC_000313	CTIF	11	1	107666404	108005625	+
TCONS_00000976	class_code"="	XLOC_000313	CTIF	12	1	107666404	108030895	+
TCONS_00000977	class_code"j"	XLOC_000313	CTIF	12	1	107666404	108032149	+
TCONS_00000978	class_code"j"	XLOC_000313	CTIF	12	1	107783950	108032149	+
TCONS_00000979	class_code"j"	XLOC_000313	CTIF	12	1	107783950	108032149	+
TCONS_00000980	class_code"j"	XLOC_000313	CTIF	12	1	107784701	108005625	+
TCONS_00000981	class_code"j"	XLOC_000313	CTIF	10	1	107786526	107985709	+
TCONS_00000982	class_code"j"	XLOC_000313	CTIF	10	1	107800912	108018752	+
TCONS_00000983	class_code"j"	XLOC_000313	CTIF	11	1	107800924	108032149	+
TCONS_00000984	class_code"j"	XLOC_000313	CTIF	11	1	107807532	108032149	+
TCONS_00000985	class_code"="	XLOC_000314	ENSSSCG00000027951	2	1	108476147	108483740	+
TCONS_00000986	class_code"="	XLOC_000314	ENSSSCG00000027951	2	1	108480389	108482264	+
TCONS_00000987	class_code"u"	XLOC_000315		1	1	108489081	108490599	+
TCONS_00000988	class_code"u"	XLOC_000315		2	1	108489081	108499152	+
TCONS_00000989	class_code"u"	XLOC_000315		2	1	108489081	108499152	+
TCONS_00000990	class_code"j"	XLOC_000316	ENSSSCG00000025083	3	1	108567669	108607169	+
TCONS_00000991	class_code"="	XLOC_000316	ENSSSCG00000025083	4	1	108567669	108607804	+
TCONS_00000992	class_code"="	XLOC_000317	LIPG	12	1	108638411	108658696	+
TCONS_00000993	class_code"="	XLOC_000317	LIPG	12	1	108638411	108658696	+
TCONS_00000994	class_code"="	XLOC_000317	LIPG	12	1	108638411	108658696	+
TCONS_00000995	class_code"j"	XLOC_000317	LIPG	10	1	108638411	108667299	+
TCONS_00000996	class_code"j"	XLOC_000317	LIPG	14	1	108638411	108667299	+
TCONS_00000997	class_code"j"	XLOC_000317	LIPG	11	1	108638411	108667299	+
TCONS_00000998	class_code"j"	XLOC_000317	LIPG	14	1	108638411	108667299	+
TCONS_00000999	class_code"="	XLOC_000317	LIPG	14	1	108638411	108667299	+
TCONS_00001000	class_code"j"	XLOC_000317	LIPG	2	1	108661815	108667299	+
TCONS_00001001	class_code"o"	XLOC_000318	SCARNA17	2	1	108870414	108871916	+
TCONS_00001002	class_code"="	XLOC_000318	SCARNA17	1	1	108870537	108870683	+
TCONS_00001003	class_code"="	XLOC_000319	SCARNA18	1	1	108870764	108870847	+
TCONS_00001004	class_code"="	XLOC_000320	ENSSSCG00000004513	1	1	109379694	109379856	+
TCONS_00001005	class_code"="	XLOC_000321	SKA1	7	1	109665471	109732810	+
TCONS_00001006	class_code"="	XLOC_000322	MAPK4	4	1	110082309	110155090	+
TCONS_00001007	class_code"="	XLOC_000322	MAPK4	5	1	110082310	110155090	+
TCONS_00001008	class_code"="	XLOC_000322	MAPK4	5	1	110083201	110155111	+
TCONS_00001009	class_code"="	XLOC_000323	ME2	17	1	110332947	110410112	+
TCONS_00001010	class_code"j"	XLOC_000323	ME2	17	1	110332947	110411267	+
TCONS_00001011	class_code"="	XLOC_000323	ME2	17	1	110332947	110411267	+
TCONS_00001012	class_code"j"	XLOC_000323	ME2	16	1	110332947	110411267	+
TCONS_00001013	class_code"j"	XLOC_000324	ELAC1	4	1	110449728	110475876	+
TCONS_00001014	class_code"j"	XLOC_000324	ELAC1	2	1	110449864	110460116	+
TCONS_00001015	class_code"j"	XLOC_000324	ELAC1	3	1	110449864	110463530	+
TCONS_00001016	class_code"="	XLOC_000324	ELAC1	4	1	110449864	110468003	+
TCONS_00001017	class_code"j"	XLOC_000324	ELAC1	4	1	110449864	110475876	+
TCONS_00001018	class_code"="	XLOC_000324	ELAC1	4	1	110449864	110475876	+
TCONS_00001019	class_code"="	XLOC_000325	U2	1	1	110491198	110500128	+
TCONS_00001020	class_code"="	XLOC_000325	U2	1	1	110495337	110495519	+
TCONS_00001021	class_code"="	XLOC_000326	SMAD4	12	1	110508277	110569438	+
TCONS_00001022	class_code"="	XLOC_000326	SMAD4	12	1	110509116	110563187	+
TCONS_00001023	class_code"="	XLOC_000327	ENSSSCG00000004527	1	1	113933452	113933987	+
TCONS_00001024	class_code"j"	XLOC_000328	POLI	3	1	114105386	114109995	+
TCONS_00001025	class_code"j"	XLOC_000328	POLI	4	1	114105386	114111766	+
TCONS_00001026	class_code"="	XLOC_000328	POLI	16	1	114105386	114126890	+
TCONS_00001027	class_code"j"	XLOC_000328	POLI	14	1	114105386	114128221	+
TCONS_00001028	class_code"j"	XLOC_000328	POLI	15	1	114105386	114128221	+
TCONS_00001029	class_code"j"	XLOC_000328	POLI	15	1	114105386	114128221	+
TCONS_00001030	class_code"j"	XLOC_000328	POLI	15	1	114105386	114128221	+
TCONS_00001031	class_code"j"	XLOC_000328	POLI	2	1	114105666	114109995	+
TCONS_00001032	class_code"j"	XLOC_000328	POLI	4	1	114114911	114128221	+
TCONS_00001033	class_code"j"	XLOC_000328	POLI	5	1	114114911	114128221	+
TCONS_00001034	class_code"j"	XLOC_000329	C18orf54	2	1	114168800	114171360	+
TCONS_00001035	class_code"j"	XLOC_000329	C18orf54	7	1	114168808	114189869	+
TCONS_00001036	class_code"j"	XLOC_000329	C18orf54	9	1	114168810	114192355	+
TCONS_00001037	class_code"="	XLOC_000329	C18orf54	7	1	114168810	114192355	+
TCONS_00001038	class_code"j"	XLOC_000329	C18orf54	7	1	114168815	114189869	+
TCONS_00001039	class_code"="	XLOC_000329	C18orf54	9	1	114168861	114190407	+
TCONS_00001040	class_code"j"	XLOC_000329	C18orf54	8	1	114171831	114192355	+
TCONS_00001041	class_code"j"	XLOC_000329	C18orf54	7	1	114172180	114192355	+
TCONS_00001042	class_code"j"	XLOC_000329	C18orf54	7	1	114172180	114192355	+
TCONS_00001043	class_code"j"	XLOC_000329	C18orf54	6	1	114173160	114189869	+
TCONS_00001044	class_code"j"	XLOC_000329	C18orf54	6	1	114173393	114192355	+
TCONS_00001045	class_code"="	XLOC_000330	ENSSSCG00000004532	2	1	114508252	114509545	+
TCONS_00001046	class_code"="	XLOC_000331	RAB27B	6	1	114693708	114753806	+
TCONS_00001047	class_code"="	XLOC_000331	RAB27B	6	1	114693708	114755558	+
TCONS_00001048	class_code"u"	XLOC_000332		1	1	114859146	114861166	+
TCONS_00001049	class_code"u"	XLOC_000332		2	1	114859146	114873309	+
TCONS_00001050	class_code"="	XLOC_000333	ENSSSCG00000020381	1	1	115523855	115523940	+
TCONS_00001051	class_code"="	XLOC_000334	WDR7	18	1	116786055	116917894	+
TCONS_00001052	class_code"j"	XLOC_000334	WDR7	17	1	116786055	116920601	+
TCONS_00001053	class_code"="	XLOC_000334	WDR7	17	1	116786055	116920601	+
TCONS_00001054	class_code"j"	XLOC_000334	WDR7	17	1	116786055	116920601	+
TCONS_00001055	class_code"j"	XLOC_000334	WDR7	19	1	116786055	116920601	+
TCONS_00001056	class_code"j"	XLOC_000334	WDR7	18	1	116786055	116920601	+
TCONS_00001057	class_code"j"	XLOC_000334	WDR7	19	1	116786055	116920601	+
TCONS_00001058	class_code"j"	XLOC_000334	WDR7	18	1	116786055	116920601	+
TCONS_00001059	class_code"j"	XLOC_000334	WDR7	19	1	116786055	116920601	+
TCONS_00001060	class_code"j"	XLOC_000334	WDR7	18	1	116786055	116920601	+
TCONS_00001061	class_code"j"	XLOC_000334	WDR7	19	1	116786055	116920601	+
TCONS_00001062	class_code"j"	XLOC_000334	WDR7	19	1	116786402	116920601	+
TCONS_00001063	class_code"j"	XLOC_000334	WDR7	19	1	116786419	116920601	+
TCONS_00001064	class_code"j"	XLOC_000335	NARS	15	1	117493032	117510585	+
TCONS_00001065	class_code"="	XLOC_000335	NARS	15	1	117493534	117509485	+
TCONS_00001066	class_code"="	XLOC_000335	NARS	14	1	117493534	117510585	+
TCONS_00001067	class_code"j"	XLOC_000335	NARS	15	1	117493534	117510585	+
TCONS_00001068	class_code"u"	XLOC_000336		1	1	117523293	117525035	+
TCONS_00001069	class_code"u"	XLOC_000336		2	1	117523293	117530557	+
TCONS_00001070	class_code"u"	XLOC_000336		1	1	117528266	117530774	+
TCONS_00001071	class_code"u"	XLOC_000337		2	1	117532006	117628396	+
TCONS_00001072	class_code"="	XLOC_000338	MTFMT	9	1	117634395	117665152	+
TCONS_00001073	class_code"j"	XLOC_000338	MTFMT	9	1	117634395	117665537	+
TCONS_00001074	class_code"j"	XLOC_000338	MTFMT	9	1	117634395	117665537	+
TCONS_00001075	class_code"j"	XLOC_000338	MTFMT	8	1	117634395	117665537	+
TCONS_00001076	class_code"j"	XLOC_000338	MTFMT	8	1	117634395	117665537	+
TCONS_00001077	class_code"j"	XLOC_000338	MTFMT	9	1	117634395	117665537	+
TCONS_00001078	class_code"="	XLOC_000339	SPG21	9	1	117675766	117700544	+
TCONS_00001079	class_code"j"	XLOC_000339	SPG21	8	1	117675766	117700713	+
TCONS_00001080	class_code"j"	XLOC_000339	SPG21	7	1	117675766	117700713	+
TCONS_00001081	class_code"j"	XLOC_000339	SPG21	8	1	117675766	117700713	+
TCONS_00001082	class_code"j"	XLOC_000339	SPG21	9	1	117677717	117700713	+
TCONS_00001083	class_code"="	XLOC_000340	ANKDD1A	14	1	117811683	117851512	+
TCONS_00001084	class_code"="	XLOC_000341	ENSSSCG00000020916	2	1	118044121	118053659	+
TCONS_00001085	class_code"="	XLOC_000341	ENSSSCG00000020916	2	1	118044143	118050736	+
TCONS_00001086	class_code"u"	XLOC_000342		2	1	118056770	118057793	+
TCONS_00001087	class_code"j"	XLOC_000343	RBPMS2	6	1	118090300	118119950	+
TCONS_00001088	class_code"="	XLOC_000343	RBPMS2	7	1	118116557	118128074	+
TCONS_00001089	class_code"j"	XLOC_000344	OAZ2	6	1	118156309	118172300	+
TCONS_00001090	class_code"="	XLOC_000344	OAZ2	5	1	118156745	118170277	+
TCONS_00001091	class_code"="	XLOC_000345	ENSSSCG00000004555	3	1	118623387	118625586	+
TCONS_00001092	class_code"="	XLOC_000345	ENSSSCG00000004555	4	1	118623387	118625948	+
TCONS_00001093	class_code"j"	XLOC_000346	CSNK1G1	10	1	118711051	118792186	+
TCONS_00001094	class_code"j"	XLOC_000346	CSNK1G1	8	1	118712219	118761360	+
TCONS_00001095	class_code"j"	XLOC_000346	CSNK1G1	9	1	118712219	118774266	+
TCONS_00001096	class_code"="	XLOC_000346	CSNK1G1	11	1	118712219	118792186	+
TCONS_00001097	class_code"="	XLOC_000347	ENSSSCG00000004557	4	1	118800887	118806518	+
TCONS_00001098	class_code"j"	XLOC_000348	ENSSSCG00000004556	13	1	118815533	118848240	+
TCONS_00001099	class_code"="	XLOC_000348	ENSSSCG00000004556	14	1	118815671	118848240	+
TCONS_00001100	class_code"="	XLOC_000348	ENSSSCG00000004556	14	1	118816806	118837774	+
TCONS_00001101	class_code"j"	XLOC_000349	HERC1	78	1	119361944	119562069	+
TCONS_00001102	class_code"j"	XLOC_000349	HERC1	79	1	119361944	119570941	+
TCONS_00001103	class_code"j"	XLOC_000349	HERC1	78	1	119361945	119570941	+
TCONS_00001104	class_code"j"	XLOC_000349	HERC1	79	1	119361946	119562069	+
TCONS_00001105	class_code"j"	XLOC_000349	HERC1	79	1	119361962	119562069	+
TCONS_00001106	class_code"j"	XLOC_000349	HERC1	79	1	119361962	119562069	+
TCONS_00001107	class_code"j"	XLOC_000349	HERC1	80	1	119361962	119570941	+
TCONS_00001108	class_code"="	XLOC_000349	HERC1	78	1	119405160	119560544	+
TCONS_00001109	class_code"j"	XLOC_000349	HERC1	55	1	119460865	119562069	+
TCONS_00001110	class_code"="	XLOC_000350	SNORD112	54	1	119471871	119562069	+
TCONS_00001111	class_code"j"	XLOC_000349	HERC1	1	1	119471344	119471415	+
TCONS_00001112	class_code"j"	XLOC_000351	ENSSSCG00000004563	7	1	119583858	119630526	+
TCONS_00001113	class_code"j"	XLOC_000351	ENSSSCG00000004563	8	1	119583858	119630526	+
TCONS_00001114	class_code"j"	XLOC_000351	ENSSSCG00000004563	9	1	119583858	119630526	+
TCONS_00001115	class_code"="	XLOC_000351	ENSSSCG00000004563	10	1	119588475	119610419	+
TCONS_00001116	class_code"j"	XLOC_000351	ENSSSCG00000004563	8	1	119588607	119630526	+
TCONS_00001117	class_code"j"	XLOC_000351	ENSSSCG00000004563	7	1	119588909	119630526	+
TCONS_00001118	class_code"j"	XLOC_000351	ENSSSCG00000004563	9	1	119588909	119630526	+
TCONS_00001119	class_code"j"	XLOC_000351	ENSSSCG00000004563	4	1	119606058	119630526	+
TCONS_00001120	class_code"j"	XLOC_000352	CA12	6	1	119861129	119869383	+
TCONS_00001121	class_code"="	XLOC_000352	CA12	4	1	119861129	119869383	+
TCONS_00001122	class_code"="	XLOC_000353	RPS27L	4	1	120104404	120113528	+
TCONS_00001123	class_code"="	XLOC_000353	RPS27L	4	1	120104404	120116506	+
TCONS_00001124	class_code"o"	XLOC_000354	ENSSSCG00000004572	2	1	121176877	121178385	+
TCONS_00001125	class_code"="	XLOC_000354	ENSSSCG00000004572	1	1	121177222	121178338	+
TCONS_00001126	class_code"j"	XLOC_000355	ENSSSCG00000030636	10	1	121360272	121404146	+
TCONS_00001127	class_code"j"	XLOC_000355	ENSSSCG00000030636	10	1	121360272	121404146	+
TCONS_00001128	class_code"j"	XLOC_000355	ENSSSCG00000030636	10	1	121360272	121404146	+
TCONS_00001129	class_code"j"	XLOC_000355	ENSSSCG00000030636	10	1	121361112	121404146	+
TCONS_00001130	class_code"="	XLOC_000355	ENSSSCG00000030636	6	1	121361148	121391787	+
TCONS_00001131	class_code"j"	XLOC_000356	ENSSSCG00000024949	39	1	121404443	121474195	+
TCONS_00001132	class_code"j"	XLOC_000356	ENSSSCG00000024949	38	1	121405514	121474195	+
TCONS_00001133	class_code"j"	XLOC_000356	ENSSSCG00000024949	39	1	121406360	121474195	+
TCONS_00001134	class_code"j"	XLOC_000356	ENSSSCG00000024949	39	1	121406360	121474195	+
TCONS_00001135	class_code"j"	XLOC_000356	ENSSSCG00000024949	39	1	121406360	121474195	+
TCONS_00001136	class_code"="	XLOC_000356	ENSSSCG00000024949	2	1	121412873	121413677	+
TCONS_00001137	class_code"="	XLOC_000356	ENSSSCG00000027318	2	1	121436422	121438632	+
TCONS_00001138	class_code"u"	XLOC_000356		19	1	121440746	121474195	+
TCONS_00001139	class_code"j"	XLOC_000357	ENSSSCG00000023568	7	1	121477116	121486245	+
TCONS_00001140	class_code"="	XLOC_000357	ENSSSCG00000023568	4	1	121477118	121480032	+
TCONS_00001141	class_code"j"	XLOC_000357	ENSSSCG00000023568	6	1	121477118	121486245	+
TCONS_00001142	class_code"="	XLOC_000357	ENSSSCG00000023100	3	1	121481568	121485624	+
TCONS_00001143	class_code"j"	XLOC_000358	ENSSSCG00000025747	18	1	121487345	121515440	+
TCONS_00001144	class_code"j"	XLOC_000358	ENSSSCG00000025747	22	1	121487345	121530629	+
TCONS_00001145	class_code"="	XLOC_000358	ENSSSCG00000026189	9	1	121487809	121502082	+
TCONS_00001146	class_code"j"	XLOC_000358	ENSSSCG00000025747	21	1	121487829	121530629	+
TCONS_00001147	class_code"="	XLOC_000358	ENSSSCG00000025747	13	1	121502193	121530423	+
TCONS_00001148	class_code"u"	XLOC_000359		2	1	122437148	122448774	+
TCONS_00001149	class_code"u"	XLOC_000360		2	1	122472444	122569407	+
TCONS_00001150	class_code"u"	XLOC_000360		2	1	122472444	122569407	+
TCONS_00001151	class_code"u"	XLOC_000360		5	1	122472444	122855045	+
TCONS_00001152	class_code"u"	XLOC_000361		1	1	122834272	122856435	+
TCONS_00001153	class_code"u"	XLOC_000361		1	1	122836423	122856435	+
TCONS_00001154	class_code"u"	XLOC_000361		1	1	122570383	122589151	+
TCONS_00001155	class_code"u"	XLOC_000361		3	1	122570390	122596528	+
TCONS_00001156	class_code"u"	XLOC_000361		4	1	122570423	122596528	+
TCONS_00001157	class_code"u"	XLOC_000360		3	1	122585843	122596528	+
TCONS_00001158	class_code"u"	XLOC_000360		2	1	122589330	122596528	+
TCONS_00001159	class_code"u"	XLOC_000362		1	1	123052855	123118748	+
TCONS_00001160	class_code"j"	XLOC_000362	RORA	10	1	123053051	123250351	+
TCONS_00001161	class_code"u"	XLOC_000362		2	1	123053053	123118748	+
TCONS_00001162	class_code"j"	XLOC_000362	RORA	10	1	123126383	123250351	+
TCONS_00001163	class_code"="	XLOC_000362	RORA	16	1	123140554	123240772	+
TCONS_00001164	class_code"j"	XLOC_000363	ICE2	13	1	123254859	123310994	+
TCONS_00001165	class_code"j"	XLOC_000363	ICE2	16	1	123254859	123345276	+
TCONS_00001166	class_code"j"	XLOC_000363	ICE2	19	1	123254859	123345276	+
TCONS_00001167	class_code"="	XLOC_000363	ICE2	17	1	123254859	123345276	+
TCONS_00001168	class_code"="	XLOC_000363	ICE2	18	1	123254927	123339939	+
TCONS_00001169	class_code"="	XLOC_000363	ICE2	16	1	123254927	123339939	+
TCONS_00001170	class_code"j"	XLOC_000363	ICE2	15	1	123254927	123345276	+
TCONS_00001171	class_code"j"	XLOC_000363	ICE2	18	1	123254927	123345276	+
TCONS_00001172	class_code"j"	XLOC_000363	ICE2	12	1	123272457	123345276	+
TCONS_00001173	class_code"j"	XLOC_000363	ICE2	8	1	123277629	123345276	+
TCONS_00001174	class_code"j"	XLOC_000363	ICE2	4	1	123283459	123299985	+
TCONS_00001175	class_code"j"	XLOC_000363	ICE2	9	1	123283873	123345276	+
TCONS_00001176	class_code"="	XLOC_000364	ANXA2	13	1	123368015	123414408	+
TCONS_00001177	class_code"="	XLOC_000364	ANXA2	13	1	123368486	123414408	+
TCONS_00001178	class_code"="	XLOC_000365	BNIP2	10	1	124261170	124279310	+
TCONS_00001179	class_code"j"	XLOC_000365	BNIP2	10	1	124261170	124279633	+
TCONS_00001180	class_code"="	XLOC_000366	GTF2A2	5	1	124288103	124321337	+
TCONS_00001181	class_code"="	XLOC_000366	GTF2A2	5	1	124288258	124316702	+
TCONS_00001182	class_code"j"	XLOC_000366	GTF2A2	4	1	124288258	124321337	+
TCONS_00001183	class_code"="	XLOC_000367	MYO1E	28	1	124676140	124903285	+
TCONS_00001184	class_code"j"	XLOC_000367	MYO1E	27	1	124676187	124903285	+
TCONS_00001185	class_code"="	XLOC_000367	MYO1E	28	1	124676342	124901532	+
TCONS_00001186	class_code"u"	XLOC_000368		2	1	124942698	124945102	+
TCONS_00001187	class_code"j"	XLOC_000369	ENSSSCG00000004592	13	1	125132552	125168396	+
TCONS_00001188	class_code"="	XLOC_000369	ENSSSCG00000004592	14	1	125132688	125168396	+
TCONS_00001189	class_code"j"	XLOC_000369	ENSSSCG00000004592	14	1	125132721	125168396	+
TCONS_00001190	class_code"j"	XLOC_000369	ENSSSCG00000004592	14	1	125132721	125168396	+
TCONS_00001191	class_code"="	XLOC_000369	ENSSSCG00000004592	14	1	125132753	125167752	+
TCONS_00001192	class_code"j"	XLOC_000369	ENSSSCG00000004592	14	1	125132753	125168396	+
TCONS_00001193	class_code"j"	XLOC_000369	ENSSSCG00000004592	13	1	125132753	125168396	+
TCONS_00001194	class_code"j"	XLOC_000369	ENSSSCG00000004592	14	1	125133245	125168396	+
TCONS_00001195	class_code"j"	XLOC_000369	ENSSSCG00000004592	14	1	125133245	125168396	+
TCONS_00001196	class_code"j"	XLOC_000369	ENSSSCG00000004592	8	1	125157259	125168396	+
TCONS_00001197	class_code"u"	XLOC_000370		1	1	125171709	125184233	+
TCONS_00001198	class_code"u"	XLOC_000370		2	1	125174413	125184233	+
TCONS_00001199	class_code"o"	XLOC_000371	ENSSSCG00000023625	4	1	125224380	125325874	+
TCONS_00001200	class_code"="	XLOC_000371	ENSSSCG00000023625	1	1	125224397	125225324	+
TCONS_00001201	class_code"u"	XLOC_000371		1	1	125297304	125298625	+
TCONS_00001202	class_code"j"	XLOC_000372	ENSSSCG00000004594	4	1	125332962	125380806	+
TCONS_00001203	class_code"u"	XLOC_000372		1	1	125332971	125334880	+
TCONS_00001204	class_code"j"	XLOC_000372	ENSSSCG00000004594	5	1	125332991	125379412	+
TCONS_00001205	class_code"="	XLOC_000372	ENSSSCG00000004594	2	1	125355480	125355872	+
TCONS_00001206	class_code"j"	XLOC_000372	ENSSSCG00000004594	2	1	125355558	125356611	+
TCONS_00001207	class_code"="	XLOC_000372	ENSSSCG00000004594	6	1	125355558	125379412	+
TCONS_00001208	class_code"="	XLOC_000373	ENSSSCG00000029184	1	1	125409147	125411249	+
TCONS_00001209	class_code"="	XLOC_000373	ENSSSCG00000029184	1	1	125409316	125410243	+
TCONS_00001210	class_code"="	XLOC_000374	ENSSSCG00000021143	3	1	125443230	125450364	+
TCONS_00001211	class_code"j"	XLOC_000375	ENSSSCG00000025578	5	1	126092031	126097493	+
TCONS_00001212	class_code"="	XLOC_000375	ENSSSCG00000025578	6	1	126092061	126105183	+
TCONS_00001213	class_code"x"	XLOC_000376	MYZAP	4	1	126393943	126425023	+
TCONS_00001214	class_code"="	XLOC_000377	ENSSSCG00000026445	2	1	126609774	126611419	+
TCONS_00001215	class_code"j"	XLOC_000378	ZNF280D	19	1	127597556	127740839	+
TCONS_00001216	class_code"j"	XLOC_000378	ZNF280D	11	1	127597557	127660994	+
TCONS_00001217	class_code"j"	XLOC_000378	ZNF280D	20	1	127597654	127740839	+
TCONS_00001218	class_code"="	XLOC_000378	ZNF280D	19	1	127597654	127740839	+
TCONS_00001219	class_code"j"	XLOC_000378	ZNF280D	20	1	127597698	127740839	+
TCONS_00001220	class_code"j"	XLOC_000378	ZNF280D	16	1	127597872	127677960	+
TCONS_00001221	class_code"="	XLOC_000378	ZNF280D	20	1	127597934	127719722	+
TCONS_00001222	class_code"j"	XLOC_000378	ZNF280D	20	1	127597934	127740839	+
TCONS_00001223	class_code"j"	XLOC_000378	ZNF280D	20	1	127597934	127740839	+
TCONS_00001224	class_code"j"	XLOC_000378	ZNF280D	17	1	127597934	127740839	+
TCONS_00001225	class_code"j"	XLOC_000379	MNS1	9	1	127766406	127819606	+
TCONS_00001226	class_code"j"	XLOC_000379	MNS1	10	1	127766406	127822433	+
TCONS_00001227	class_code"j"	XLOC_000379	MNS1	11	1	127766406	127822433	+
TCONS_00001228	class_code"="	XLOC_000379	MNS1	10	1	127767311	127821308	+
TCONS_00001229	class_code"j"	XLOC_000379	MNS1	8	1	127800963	127822433	+
TCONS_00001230	class_code"="	XLOC_000380	7SK	1	1	127843475	127843799	+
TCONS_00001231	class_code"="	XLOC_000381	7SK	1	1	127993024	127993348	+
TCONS_00001232	class_code"="	XLOC_000382	ENSSSCG00000024210	2	1	128199542	128256685	+
TCONS_00001233	class_code"j"	XLOC_000383	RFX7	4	1	128262555	128297612	+
TCONS_00001234	class_code"j"	XLOC_000383	RFX7	5	1	128262555	128297612	+
TCONS_00001235	class_code"j"	XLOC_000383	RFX7	4	1	128262555	128297612	+
TCONS_00001236	class_code"="	XLOC_000383	RFX7	5	1	128262555	128297612	+
TCONS_00001237	class_code"="	XLOC_000383	RFX7	5	1	128274902	128288834	+
TCONS_00001238	class_code"j"	XLOC_000384	ENSSSCG00000029459	5	1	128359699	128384859	+
TCONS_00001239	class_code"="	XLOC_000384	ENSSSCG00000029459	6	1	128359699	128511305	+
TCONS_00001240	class_code"="	XLOC_000384	ENSSSCG00000029459	6	1	128359699	128512473	+
TCONS_00001241	class_code"u"	XLOC_000385		5	1	128517286	128532099	+
TCONS_00001242	class_code"u"	XLOC_000386		1	1	128558203	128566498	+
TCONS_00001243	class_code"u"	XLOC_000386		2	1	128558203	128566498	+
TCONS_00001244	class_code"u"	XLOC_000387		18	1	128620906	128754525	+
TCONS_00001245	class_code"u"	XLOC_000387		2	1	128623138	128682658	+
TCONS_00001246	class_code"u"	XLOC_000387		10	1	128664374	128697689	+
TCONS_00001247	class_code"u"	XLOC_000387		17	1	128664374	128754525	+
TCONS_00001248	class_code"u"	XLOC_000387		6	1	128682022	128688073	+
TCONS_00001249	class_code"u"	XLOC_000387		7	1	128683978	128697689	+
TCONS_00001250	class_code"u"	XLOC_000387		9	1	128692322	128754525	+
TCONS_00001251	class_code"u"	XLOC_000387		7	1	128740602	128766051	+
TCONS_00001252	class_code"="	XLOC_000388	PYGO1	3	1	128780599	128806568	+
TCONS_00001253	class_code"="	XLOC_000388	PYGO1	3	1	128780599	128821327	+
TCONS_00001254	class_code"j"	XLOC_000388	DNAAF4	5	1	128780599	128884643	+
TCONS_00001255	class_code"j"	XLOC_000388	DNAAF4	2	1	128817435	128823168	+
TCONS_00001256	class_code"j"	XLOC_000388	DNAAF4	3	1	128817637	128825621	+
TCONS_00001257	class_code"j"	XLOC_000388	DNAAF4	5	1	128817637	128892195	+
TCONS_00001258	class_code"="	XLOC_000388	DNAAF4	4	1	128819813	128825621	+
TCONS_00001259	class_code"="	XLOC_000388	DNAAF4	6	1	128819813	128890994	+
TCONS_00001260	class_code"j"	XLOC_000388	DNAAF4	3	1	128887476	128897010	+
TCONS_00001261	class_code"j"	XLOC_000388	DNAAF4	2	1	128887818	128892195	+
TCONS_00001262	class_code"j"	XLOC_000389	CCPG1	4	1	129009560	129016092	+
TCONS_00001263	class_code"j"	XLOC_000389	CCPG1	3	1	129010220	129016092	+
TCONS_00001264	class_code"j"	XLOC_000389	CCPG1	5	1	129010220	129028947	+
TCONS_00001265	class_code"="	XLOC_000389	CCPG1	6	1	129010220	129028947	+
TCONS_00001266	class_code"="	XLOC_000390	ssc-mir-628	1	1	129013473	129013553	+
TCONS_00001267	class_code"j"	XLOC_000391	RAB27A	6	1	129070232	129144160	+
TCONS_00001268	class_code"j"	XLOC_000391	RAB27A	7	1	129070232	129144160	+
TCONS_00001269	class_code"j"	XLOC_000391	RAB27A	8	1	129070232	129144160	+
TCONS_00001270	class_code"="	XLOC_000391	RAB27A	6	1	129070232	129144160	+
TCONS_00001271	class_code"="	XLOC_000392	RSL24D1	6	1	129149989	129169275	+
TCONS_00001272	class_code"="	XLOC_000392	RSL24D1	6	1	129149989	129171295	+
TCONS_00001273	class_code"="	XLOC_000393	ENSSSCG00000025257	1	1	130671571	130671727	+
TCONS_00001274	class_code"="	XLOC_000394	ENSSSCG00000024057	3	1	130700418	130733250	+
TCONS_00001275	class_code"="	XLOC_000395	ENSSSCG00000004615	5	1	130775014	130860021	+
TCONS_00001276	class_code"="	XLOC_000396	ONECUT1	2	1	131981653	132018684	+
TCONS_00001277	class_code"j"	XLOC_000397	FAM214A	13	1	132089039	132192656	+
TCONS_00001278	class_code"j"	XLOC_000397	FAM214A	10	1	132089042	132173349	+
TCONS_00001279	class_code"j"	XLOC_000397	FAM214A	11	1	132089042	132187727	+
TCONS_00001280	class_code"j"	XLOC_000397	FAM214A	13	1	132089042	132192656	+
TCONS_00001281	class_code"j"	XLOC_000397	FAM214A	10	1	132089047	132173349	+
TCONS_00001282	class_code"j"	XLOC_000397	FAM214A	9	1	132089222	132163675	+
TCONS_00001283	class_code"j"	XLOC_000397	FAM214A	9	1	132089291	132163675	+
TCONS_00001284	class_code"j"	XLOC_000397	FAM214A	13	1	132089291	132192656	+
TCONS_00001285	class_code"j"	XLOC_000397	FAM214A	3	1	132089297	132108563	+
TCONS_00001286	class_code"j"	XLOC_000397	FAM214A	9	1	132089307	132163675	+
TCONS_00001287	class_code"="	XLOC_000397	FAM214A	12	1	132090590	132191884	+
TCONS_00001288	class_code"j"	XLOC_000397	FAM214A	4	1	132170764	132192656	+
TCONS_00001289	class_code"j"	XLOC_000397	FAM214A	3	1	132188652	132192656	+
TCONS_00001290	class_code"j"	XLOC_000398	ARPP19	4	1	132202844	132222623	+
TCONS_00001291	class_code"j"	XLOC_000398	ARPP19	4	1	132202848	132222623	+
TCONS_00001292	class_code"j"	XLOC_000398	ARPP19	4	1	132202883	132222623	+
TCONS_00001293	class_code"="	XLOC_000398	ARPP19	3	1	132202979	132222003	+
TCONS_00001294	class_code"j"	XLOC_000398	ARPP19	3	1	132216532	132222623	+
TCONS_00001295	class_code"j"	XLOC_000399	MYO5A	40	1	132234219	132481567	+
TCONS_00001296	class_code"j"	XLOC_000399	MYO5A	41	1	132234473	132481567	+
TCONS_00001297	class_code"j"	XLOC_000399	MYO5A	40	1	132234473	132481567	+
TCONS_00001298	class_code"j"	XLOC_000399	MYO5A	41	1	132234473	132481567	+
TCONS_00001299	class_code"j"	XLOC_000399	MYO5A	44	1	132234508	132481567	+
TCONS_00001300	class_code"j"	XLOC_000399	MYO5A	41	1	132314369	132481567	+
TCONS_00001301	class_code"j"	XLOC_000399	MYO5A	40	1	132314369	132481567	+
TCONS_00001302	class_code"j"	XLOC_000399	MYO5A	44	1	132314369	132481567	+
TCONS_00001303	class_code"j"	XLOC_000399	MYO5A	40	1	132314369	132481567	+
TCONS_00001304	class_code"j"	XLOC_000399	MYO5A	41	1	132314369	132481567	+
TCONS_00001305	class_code"="	XLOC_000399	MYO5A	41	1	132314369	132481567	+
TCONS_00001306	class_code"j"	XLOC_000399	MYO5A	14	1	132426008	132481567	+
TCONS_00001307	class_code"="	XLOC_000400	MYO5C	41	1	132514136	132624890	+
TCONS_00001308	class_code"j"	XLOC_000401	GNB5	12	1	132632470	132679845	+
TCONS_00001309	class_code"="	XLOC_000401	GNB5	12	1	132632470	132679845	+
TCONS_00001310	class_code"="	XLOC_000401	GNB5	11	1	132635593	132679845	+
TCONS_00001311	class_code"j"	XLOC_000401	GNB5	6	1	132666856	132679845	+
TCONS_00001312	class_code"="	XLOC_000402	BCL2L10	2	1	132686938	132689560	+
TCONS_00001313	class_code"j"	XLOC_000403	LEO1	12	1	132893679	132932939	+
TCONS_00001314	class_code"="	XLOC_000403	LEO1	12	1	132895032	132932794	+
TCONS_00001315	class_code"j"	XLOC_000404	SCG3	14	1	133087517	133181070	+
TCONS_00001316	class_code"j"	XLOC_000404	SCG3	14	1	133087517	133181070	+
TCONS_00001317	class_code"="	XLOC_000404	SCG3	13	1	133087517	133181070	+
TCONS_00001318	class_code"j"	XLOC_000405	TMOD2	11	1	133216917	133269972	+
TCONS_00001319	class_code"j"	XLOC_000405	TMOD2	10	1	133216917	133269972	+
TCONS_00001320	class_code"="	XLOC_000405	TMOD2	10	1	133217046	133262821	+
TCONS_00001321	class_code"u"	XLOC_000406		5	1	133338953	133348684	+
TCONS_00001322	class_code"u"	XLOC_000407		3	1	133354891	133363731	+
TCONS_00001323	class_code"j"	XLOC_000408	ENSSSCG00000004631	11	1	133370725	133450293	+
TCONS_00001324	class_code"j"	XLOC_000408	ENSSSCG00000004631	6	1	133371486	133444982	+
TCONS_00001325	class_code"="	XLOC_000408	ENSSSCG00000004631	10	1	133371486	133450293	+
TCONS_00001326	class_code"="	XLOC_000409	CYP19A1	5	1	133903978	133936093	+
TCONS_00001327	class_code"="	XLOC_000409	CYP19A1	8	1	133903978	133936093	+
TCONS_00001328	class_code"j"	XLOC_000410	SPPL2A	23	1	134441622	134572002	+
TCONS_00001329	class_code"j"	XLOC_000410	SPPL2A	21	1	134441622	134572002	+
TCONS_00001330	class_code"j"	XLOC_000410	SPPL2A	6	1	134441626	134530602	+
TCONS_00001331	class_code"j"	XLOC_000410	SPPL2A	20	1	134441626	134572002	+
TCONS_00001332	class_code"j"	XLOC_000410	SPPL2A	7	1	134515019	134530602	+
TCONS_00001333	class_code"j"	XLOC_000410	SPPL2A	23	1	134515259	134572002	+
TCONS_00001334	class_code"j"	XLOC_000410	SPPL2A	9	1	134516435	134551586	+
TCONS_00001335	class_code"="	XLOC_000410	SPPL2A	22	1	134516465	134572002	+
TCONS_00001336	class_code"j"	XLOC_000410	SPPL2A	20	1	134517859	134572002	+
TCONS_00001337	class_code"j"	XLOC_000410	SPPL2A	11	1	134542384	134572002	+
TCONS_00001338	class_code"j"	XLOC_000410	SPPL2A	6	1	134553377	134572002	+
TCONS_00001339	class_code"j"	XLOC_000410	SPPL2A	5	1	134553559	134572002	+
TCONS_00001340	class_code"j"	XLOC_000411	TRPM7	39	1	134584946	134689830	+
TCONS_00001341	class_code"j"	XLOC_000411	TRPM7	39	1	134584948	134689830	+
TCONS_00001342	class_code"j"	XLOC_000411	TRPM7	38	1	134584953	134689830	+
TCONS_00001343	class_code"j"	XLOC_000411	TRPM7	12	1	134584955	134621603	+
TCONS_00001344	class_code"j"	XLOC_000411	TRPM7	25	1	134584977	134656293	+
TCONS_00001345	class_code"j"	XLOC_000411	TRPM7	40	1	134584977	134689830	+
TCONS_00001346	class_code"j"	XLOC_000411	TRPM7	40	1	134584977	134689830	+
TCONS_00001347	class_code"j"	XLOC_000411	TRPM7	40	1	134584977	134689830	+
TCONS_00001348	class_code"j"	XLOC_000411	TRPM7	39	1	134584977	134689830	+
TCONS_00001349	class_code"j"	XLOC_000411	TRPM7	37	1	134584992	134689830	+
TCONS_00001350	class_code"j"	XLOC_000411	TRPM7	27	1	134599617	134661524	+
TCONS_00001351	class_code"="	XLOC_000411	TRPM7	38	1	134599617	134689679	+
TCONS_00001352	class_code"="	XLOC_000412	U6	1	1	134697585	134697684	+
TCONS_00001353	class_code"="	XLOC_000413	USP50	7	1	134712834	134746709	+
TCONS_00001354	class_code"="	XLOC_000414	ENSSSCG00000020721	3	1	134889871	134895078	+
TCONS_00001355	class_code"j"	XLOC_000415	ENSSSCG00000004645	9	1	134986624	135130394	+
TCONS_00001356	class_code"="	XLOC_000415	ENSSSCG00000004645	9	1	134986624	135130394	+
TCONS_00001357	class_code"j"	XLOC_000415	ENSSSCG00000004645	9	1	135087144	135130394	+
TCONS_00001358	class_code"j"	XLOC_000415	ENSSSCG00000004645	9	1	135087202	135130394	+
TCONS_00001359	class_code"="	XLOC_000416	HDC	12	1	135147966	135166937	+
TCONS_00001360	class_code"="	XLOC_000417	ENSSSCG00000004646	20	1	135295130	135636501	+
TCONS_00001361	class_code"j"	XLOC_000418	ENSSSCG00000004648	8	1	135810186	135910056	+
TCONS_00001362	class_code"="	XLOC_000418	ENSSSCG00000004648	7	1	135810193	135906879	+
TCONS_00001363	class_code"j"	XLOC_000418	ENSSSCG00000004648	8	1	135810193	135910056	+
TCONS_00001364	class_code"="	XLOC_000419	ENSSSCG00000027906	2	1	135829799	135835446	+
TCONS_00001365	class_code"="	XLOC_000420	ENSSSCG00000020664	2	1	135926617	135927935	+
TCONS_00001366	class_code"="	XLOC_000421	ENSSSCG00000020800	2	1	136072699	136074017	+
TCONS_00001367	class_code"j"	XLOC_000422	COPS2	12	1	136318495	136400160	+
TCONS_00001368	class_code"j"	XLOC_000422	COPS2	12	1	136318495	136400160	+
TCONS_00001369	class_code"j"	XLOC_000422	COPS2	13	1	136318495	136400351	+
TCONS_00001370	class_code"="	XLOC_000422	COPS2	13	1	136318909	136400351	+
TCONS_00001371	class_code"u"	XLOC_000423		4	1	136403357	136441680	+
TCONS_00001372	class_code"u"	XLOC_000423		1	1	136403369	136410108	+
TCONS_00001373	class_code"u"	XLOC_000423		2	1	136403369	136428193	+
TCONS_00001374	class_code"u"	XLOC_000423		2	1	136403557	136410108	+
TCONS_00001375	class_code"u"	XLOC_000423		1	1	136411255	136412958	+
TCONS_00001376	class_code"="	XLOC_000424	SECISBP2L	18	1	136458260	136513293	+
TCONS_00001377	class_code"="	XLOC_000424	SECISBP2L	17	1	136458260	136513963	+
TCONS_00001378	class_code"j"	XLOC_000424	SECISBP2L	15	1	136458260	136513963	+
TCONS_00001379	class_code"j"	XLOC_000424	SECISBP2L	16	1	136458260	136513963	+
TCONS_00001380	class_code"j"	XLOC_000424	SECISBP2L	18	1	136458260	136513963	+
TCONS_00001381	class_code"j"	XLOC_000424	SECISBP2L	9	1	136483562	136513963	+
TCONS_00001382	class_code"j"	XLOC_000424	SECISBP2L	5	1	136489945	136513963	+
TCONS_00001383	class_code"="	XLOC_000425	SHC4	12	1	136551194	136693867	+
TCONS_00001384	class_code"j"	XLOC_000426	CEP152	27	1	136701155	136802470	+
TCONS_00001385	class_code"j"	XLOC_000426	CEP152	26	1	136701159	136802470	+
TCONS_00001386	class_code"j"	XLOC_000426	CEP152	26	1	136701159	136802470	+
TCONS_00001387	class_code"j"	XLOC_000426	CEP152	5	1	136701201	136715978	+
TCONS_00001388	class_code"="	XLOC_000426	CEP152	29	1	136701248	136802146	+
TCONS_00001389	class_code"="	XLOC_000426	CEP152	27	1	136701248	136802158	+
TCONS_00001390	class_code"j"	XLOC_000426	CEP152	28	1	136701248	136802470	+
TCONS_00001391	class_code"j"	XLOC_000426	CEP152	27	1	136701248	136802470	+
TCONS_00001392	class_code"j"	XLOC_000426	CEP152	30	1	136701248	136802470	+
TCONS_00001393	class_code"j"	XLOC_000426	CEP152	18	1	136734802	136802470	+
TCONS_00001394	class_code"j"	XLOC_000427	FBN1	62	1	137024896	137390604	+
TCONS_00001395	class_code"j"	XLOC_000427	FBN1	61	1	137024930	137390604	+
TCONS_00001396	class_code"j"	XLOC_000427	FBN1	62	1	137025243	137390604	+
TCONS_00001397	class_code"="	XLOC_000427	FBN1	71	1	137103319	137303566	+
TCONS_00001398	class_code"j"	XLOC_000427	FBN1	79	1	137103319	137390604	+
TCONS_00001399	class_code"u"	XLOC_000427		10	1	137366003	137390604	+
TCONS_00001400	class_code"x"	XLOC_000428	SLC12A1	7	1	137503354	137563799	+
TCONS_00001401	class_code"x"	XLOC_000428	SLC12A1	9	1	137503390	137578010	+
TCONS_00001402	class_code"u"	XLOC_000428		2	1	137505134	137507259	+
TCONS_00001403	class_code"j"	XLOC_000429	MYEF2	16	1	137630411	137669010	+
TCONS_00001404	class_code"j"	XLOC_000429	MYEF2	17	1	137630411	137669010	+
TCONS_00001405	class_code"j"	XLOC_000429	MYEF2	17	1	137630452	137673438	+
TCONS_00001406	class_code"j"	XLOC_000429	MYEF2	17	1	137630522	137669010	+
TCONS_00001407	class_code"="	XLOC_000429	MYEF2	15	1	137635280	137665200	+
TCONS_00001408	class_code"="	XLOC_000429	MYEF2	15	1	137635280	137669010	+
TCONS_00001409	class_code"="	XLOC_000430	SNORA70	1	1	139452087	139452222	+
TCONS_00001410	class_code"="	XLOC_000431	ENSSSCG00000004664	3	1	139609650	139610354	+
TCONS_00001411	class_code"j"	XLOC_000432	SQRDL	7	1	140422897	140440180	+
TCONS_00001412	class_code"="	XLOC_000432	SQRDL	6	1	140423060	140435915	+
TCONS_00001413	class_code"j"	XLOC_000433	ENSSSCG00000004666	10	1	140656060	140706384	+
TCONS_00001414	class_code"j"	XLOC_000433	ENSSSCG00000004666	9	1	140668885	140706384	+
TCONS_00001415	class_code"j"	XLOC_000433	ENSSSCG00000004666	10	1	140668885	140706384	+
TCONS_00001416	class_code"="	XLOC_000433	ENSSSCG00000004666	10	1	140670862	140706384	+
TCONS_00001417	class_code"="	XLOC_000434	SLC30A4	4	1	140770603	140793361	+
TCONS_00001418	class_code"j"	XLOC_000434	SLC30A4	5	1	140770603	140793773	+
TCONS_00001419	class_code"j"	XLOC_000434	SLC30A4	4	1	140770603	140793773	+
TCONS_00001420	class_code"j"	XLOC_000435	SPATA5L1	6	1	140886546	140905102	+
TCONS_00001421	class_code"j"	XLOC_000435	SPATA5L1	8	1	140886546	140911644	+
TCONS_00001422	class_code"j"	XLOC_000435	SPATA5L1	8	1	140886546	140911644	+
TCONS_00001423	class_code"j"	XLOC_000435	SPATA5L1	8	1	140886546	140911644	+
TCONS_00001424	class_code"="	XLOC_000435	SPATA5L1	8	1	140888563	140909181	+
TCONS_00001425	class_code"="	XLOC_000436	C15orf48	5	1	140915691	140919335	+
TCONS_00001426	class_code"="	XLOC_000436	ENSSSCG00000018328	1	1	140918985	140919071	+
TCONS_00001427	class_code"j"	XLOC_000437	SHF	6	1	141148742	141169927	+
TCONS_00001428	class_code"="	XLOC_000437	SHF	7	1	141148746	141169741	+
TCONS_00001429	class_code"j"	XLOC_000437	SHF	8	1	141148746	141169927	+
TCONS_00001430	class_code"j"	XLOC_000437	SHF	4	1	141163017	141169927	+
TCONS_00001431	class_code"="	XLOC_000438	DUOXA2	6	1	141201515	141205257	+
TCONS_00001432	class_code"j"	XLOC_000438	DUOXA2	6	1	141201515	141206116	+
TCONS_00001433	class_code"="	XLOC_000438	DUOXA2	5	1	141201515	141206116	+
TCONS_00001434	class_code"j"	XLOC_000438	DUOX2	38	1	141201515	141241329	+
TCONS_00001435	class_code"j"	XLOC_000438	DUOX2	38	1	141201515	141241329	+
TCONS_00001436	class_code"j"	XLOC_000438	DUOX2	38	1	141201515	141241329	+
TCONS_00001437	class_code"j"	XLOC_000438	DUOX2	34	1	141216738	141241329	+
TCONS_00001438	class_code"="	XLOC_000438	DUOX2	33	1	141218795	141241329	+
TCONS_00001439	class_code"="	XLOC_000438	DUOX2	32	1	141221492	141241329	+
TCONS_00001440	class_code"u"	XLOC_000439		1	1	141429349	141434793	+
TCONS_00001441	class_code"j"	XLOC_000440	ENSSSCG00000004684	7	1	141476598	141495893	+
TCONS_00001442	class_code"j"	XLOC_000440	ENSSSCG00000004684	9	1	141476598	141499974	+
TCONS_00001443	class_code"="	XLOC_000440	ENSSSCG00000004684	14	1	141476598	141504524	+
TCONS_00001444	class_code"j"	XLOC_000440	ENSSSCG00000004684	12	1	141476598	141504604	+
TCONS_00001445	class_code"x"	XLOC_000441	ENSSSCG00000004687	1	1	141481044	141483257	+
TCONS_00001446	class_code"x"	XLOC_000442	ENSSSCG00000004687	1	1	141490245	141491289	+
TCONS_00001447	class_code"x"	XLOC_000443	ENSSSCG00000004687	1	1	141491973	141493370	+
TCONS_00001448	class_code"="	XLOC_000444	PATL2	13	1	141558709	141566148	+
TCONS_00001449	class_code"="	XLOC_000445	ENSSSCG00000030483	3	1	141620887	141628440	+
TCONS_00001450	class_code"="	XLOC_000445	ENSSSCG00000030483	3	1	141621937	141627673	+
TCONS_00001451	class_code"j"	XLOC_000445	ENSSSCG00000030483	2	1	141626729	141628440	+
TCONS_00001452	class_code"j"	XLOC_000446	ENSSSCG00000023996	4	1	141681959	141949899	+
TCONS_00001453	class_code"j"	XLOC_000446	ENSSSCG00000004693	9	1	141681959	141994593	+
TCONS_00001454	class_code"j"	XLOC_000446	ENSSSCG00000023996	2	1	141682596	141826554	+
TCONS_00001455	class_code"="	XLOC_000446	ENSSSCG00000023996	3	1	141682596	141949823	+
TCONS_00001456	class_code"j"	XLOC_000447	ENSSSCG00000028089	7	1	141951649	141994485	+
TCONS_00001457	class_code"j"	XLOC_000447	ENSSSCG00000028089	3	1	141715763	141723599	+
TCONS_00001458	class_code"="	XLOC_000447	ENSSSCG00000028089	2	1	141715763	141723599	+
TCONS_00001459	class_code"="	XLOC_000446	ENSSSCG00000004693	5	1	141717294	141723599	+
TCONS_00001460	class_code"j"	XLOC_000448	FRMD5	5	1	142445123	142464499	+
TCONS_00001461	class_code"="	XLOC_000448	FRMD5	16	1	142445123	142477025	+
TCONS_00001462	class_code"j"	XLOC_000449	ENSSSCG00000025604	10	1	142570894	142587649	+
TCONS_00001463	class_code"o"	XLOC_000449	ENSSSCG00000025604	6	1	142570949	142579935	+
TCONS_00001464	class_code"o"	XLOC_000449	ENSSSCG00000025604	8	1	142570964	142584935	+
TCONS_00001465	class_code"="	XLOC_000449	ENSSSCG00000025604	2	1	142576040	142576181	+
TCONS_00001466	class_code"j"	XLOC_000450	SERINC4	5	1	142588178	142595365	+
TCONS_00001467	class_code"j"	XLOC_000450	SERINC4	3	1	142588591	142595365	+
TCONS_00001468	class_code"="	XLOC_000450	SERINC4	13	1	142589883	142594314	+
TCONS_00001469	class_code"j"	XLOC_000450	SERINC4	6	1	142589883	142595365	+
TCONS_00001470	class_code"="	XLOC_000450	SERINC4	10	1	142590237	142594024	+
TCONS_00001471	class_code"j"	XLOC_000450	SERINC4	12	1	142590237	142595365	+
TCONS_00001472	class_code"="	XLOC_000451	ENSSSCG00000018734	1	1	142595561	142595662	+
TCONS_00001473	class_code"="	XLOC_000452	ELL3	11	1	142610891	142614315	+
TCONS_00001474	class_code"j"	XLOC_000453	CATSPER2	12	1	142643977	142658308	+
TCONS_00001475	class_code"j"	XLOC_000453	CATSPER2	7	1	142644080	142649937	+
TCONS_00001476	class_code"j"	XLOC_000453	CATSPER2	8	1	142644080	142658308	+
TCONS_00001477	class_code"j"	XLOC_000453	CATSPER2	10	1	142644080	142658308	+
TCONS_00001478	class_code"j"	XLOC_000453	CATSPER2	9	1	142644080	142658308	+
TCONS_00001479	class_code"j"	XLOC_000453	CATSPER2	5	1	142644081	142647564	+
TCONS_00001480	class_code"j"	XLOC_000453	CATSPER2	2	1	142644110	142647564	+
TCONS_00001481	class_code"j"	XLOC_000453	CATSPER2	12	1	142644110	142658308	+
TCONS_00001482	class_code"j"	XLOC_000453	CATSPER2	14	1	142644116	142658308	+
TCONS_00001483	class_code"="	XLOC_000453	CATSPER2	13	1	142644212	142658308	+
TCONS_00001484	class_code"j"	XLOC_000453	CATSPER2	9	1	142647624	142658308	+
TCONS_00001485	class_code"j"	XLOC_000453	CATSPER2	5	1	142647624	142658308	+
TCONS_00001486	class_code"="	XLOC_000454	5S_rRNA	1	1	142659846	142659964	+
TCONS_00001487	class_code"="	XLOC_000455	STRC	29	1	142665470	142681931	+
TCONS_00001488	class_code"j"	XLOC_000456	PPIP5K1	26	1	142714871	142732553	+
TCONS_00001489	class_code"j"	XLOC_000456	PPIP5K1	27	1	142714871	142741189	+
TCONS_00001490	class_code"j"	XLOC_000456	PPIP5K1	31	1	142714871	142761753	+
TCONS_00001491	class_code"j"	XLOC_000456	PPIP5K1	26	1	142715973	142734942	+
TCONS_00001492	class_code"j"	XLOC_000456	PPIP5K1	31	1	142715985	142761753	+
TCONS_00001493	class_code"j"	XLOC_000456	PPIP5K1	27	1	142716108	142738854	+
TCONS_00001494	class_code"j"	XLOC_000456	PPIP5K1	28	1	142716108	142761753	+
TCONS_00001495	class_code"j"	XLOC_000456	PPIP5K1	31	1	142716153	142761753	+
TCONS_00001496	class_code"j"	XLOC_000456	PPIP5K1	31	1	142716153	142761753	+
TCONS_00001497	class_code"j"	XLOC_000456	PPIP5K1	32	1	142716186	142761753	+
TCONS_00001498	class_code"="	XLOC_000456	PPIP5K1	30	1	142717636	142760945	+
TCONS_00001499	class_code"="	XLOC_000457	ENSSSCG00000004706	5	1	142814193	142825616	+
TCONS_00001500	class_code"j"	XLOC_000457	ENSSSCG00000004706	4	1	142820266	142825616	+
TCONS_00001501	class_code"="	XLOC_000458	ENSSSCG00000024856	1	1	142822093	142822162	+
TCONS_00001502	class_code"u"	XLOC_000459		2	1	142833997	142837817	+
TCONS_00001503	class_code"u"	XLOC_000459		3	1	142833997	142837817	+
TCONS_00001504	class_code"j"	XLOC_000460	ZSCAN29	5	1	142940765	142954978	+
TCONS_00001505	class_code"j"	XLOC_000460	ZSCAN29	6	1	142940770	142954978	+
TCONS_00001506	class_code"j"	XLOC_000460	ZSCAN29	5	1	142940820	142954978	+
TCONS_00001507	class_code"j"	XLOC_000460	ZSCAN29	6	1	142940842	142954978	+
TCONS_00001508	class_code"j"	XLOC_000460	ZSCAN29	4	1	142940848	142954978	+
TCONS_00001509	class_code"j"	XLOC_000460	ZSCAN29	5	1	142940896	142954978	+
TCONS_00001510	class_code"="	XLOC_000460	ZSCAN29	5	1	142940977	142954978	+
TCONS_00001511	class_code"="	XLOC_000460	ZSCAN29	5	1	142941220	142951245	+
TCONS_00001512	class_code"j"	XLOC_000460	ZSCAN29	3	1	142943373	142954978	+
TCONS_00001513	class_code"j"	XLOC_000460	ZSCAN29	2	1	142946384	142954978	+
TCONS_00001514	class_code"="	XLOC_000461	LCMT2	1	1	142982428	142984486	+
TCONS_00001515	class_code"="	XLOC_000462	TGM7	12	1	143025883	143041134	+
TCONS_00001516	class_code"="	XLOC_000463	TGM5	12	1	143053336	143073905	+
TCONS_00001517	class_code"j"	XLOC_000464	ENSSSCG00000028721	2	1	143086340	143091514	+
TCONS_00001518	class_code"j"	XLOC_000464	ENSSSCG00000028721	3	1	143086340	143093744	+
TCONS_00001519	class_code"j"	XLOC_000464	ENSSSCG00000028721	4	1	143086340	143095094	+
TCONS_00001520	class_code"j"	XLOC_000464	ENSSSCG00000028721	4	1	143086357	143093744	+
TCONS_00001521	class_code"="	XLOC_000464	ENSSSCG00000028721	5	1	143086578	143095094	+
TCONS_00001522	class_code"u"	XLOC_000465		3	1	143096535	143102922	+
TCONS_00001523	class_code"="	XLOC_000466	ENSSSCG00000023164	3	1	143102948	143103909	+
TCONS_00001524	class_code"j"	XLOC_000466	ENSSSCG00000023164	3	1	143102948	143105165	+
TCONS_00001525	class_code"="	XLOC_000466	ENSSSCG00000023164	3	1	143102948	143105165	+
TCONS_00001526	class_code"="	XLOC_000467	EPB42	12	1	143112248	143129438	+
TCONS_00001527	class_code"="	XLOC_000468	ENSSSCG00000004716	5	1	143187619	143198162	+
TCONS_00001528	class_code"j"	XLOC_000468	ENSSSCG00000004716	4	1	143187619	143198262	+
TCONS_00001529	class_code"u"	XLOC_000469		1	1	143200780	143203311	+
TCONS_00001530	class_code"j"	XLOC_000469	UBR1	46	1	143201130	143319623	+
TCONS_00001531	class_code"j"	XLOC_000469	UBR1	45	1	143201130	143319623	+
TCONS_00001532	class_code"j"	XLOC_000469	UBR1	6	1	143205122	143220499	+
TCONS_00001533	class_code"j"	XLOC_000469	UBR1	32	1	143205122	143281067	+
TCONS_00001534	class_code"j"	XLOC_000469	UBR1	46	1	143205170	143319623	+
TCONS_00001535	class_code"="	XLOC_000469	UBR1	46	1	143205206	143319587	+
TCONS_00001536	class_code"="	XLOC_000469	UBR1	45	1	143205206	143319587	+
TCONS_00001537	class_code"j"	XLOC_000469	UBR1	35	1	143220899	143319623	+
TCONS_00001538	class_code"j"	XLOC_000469	UBR1	36	1	143220899	143319623	+
TCONS_00001539	class_code"j"	XLOC_000469	UBR1	15	1	143274589	143319623	+
TCONS_00001540	class_code"j"	XLOC_000469	UBR1	14	1	143275898	143319623	+
TCONS_00001541	class_code"j"	XLOC_000470	TTBK2	16	1	143333421	143478098	+
TCONS_00001542	class_code"j"	XLOC_000470	TTBK2	15	1	143333520	143478098	+
TCONS_00001543	class_code"="	XLOC_000470	TTBK2	14	1	143333520	143478098	+
TCONS_00001544	class_code"j"	XLOC_000471	CDAN1	23	1	143528076	143548225	+
TCONS_00001545	class_code"j"	XLOC_000471	CDAN1	24	1	143528076	143548225	+
TCONS_00001546	class_code"j"	XLOC_000471	CDAN1	20	1	143528076	143551604	+
TCONS_00001547	class_code"j"	XLOC_000471	CDAN1	27	1	143535445	143548225	+
TCONS_00001548	class_code"j"	XLOC_000471	CDAN1	25	1	143535445	143551604	+
TCONS_00001549	class_code"j"	XLOC_000471	CDAN1	24	1	143535445	143551604	+
TCONS_00001550	class_code"j"	XLOC_000471	CDAN1	25	1	143535445	143551604	+
TCONS_00001551	class_code"j"	XLOC_000471	CDAN1	23	1	143535521	143551604	+
TCONS_00001552	class_code"j"	XLOC_000471	CDAN1	25	1	143535526	143548181	+
TCONS_00001553	class_code"j"	XLOC_000471	CDAN1	27	1	143535526	143548225	+
TCONS_00001554	class_code"j"	XLOC_000471	CDAN1	23	1	143535526	143548225	+
TCONS_00001555	class_code"="	XLOC_000471	CDAN1	27	1	143535526	143550381	+
TCONS_00001556	class_code"j"	XLOC_000471	CDAN1	23	1	143535526	143551604	+
TCONS_00001557	class_code"j"	XLOC_000471	CDAN1	25	1	143535526	143551604	+
TCONS_00001558	class_code"j"	XLOC_000471	CDAN1	25	1	143535526	143551604	+
TCONS_00001559	class_code"j"	XLOC_000471	CDAN1	23	1	143535526	143551604	+
TCONS_00001560	class_code"j"	XLOC_000471	CDAN1	2	1	143548287	143551604	+
TCONS_00001561	class_code"="	XLOC_000472	LRRC57	6	1	143731520	143739154	+
TCONS_00001562	class_code"="	XLOC_000472	LRRC57	6	1	143731520	143740127	+
TCONS_00001563	class_code"j"	XLOC_000473	ZNF106	3	1	143786671	143813413	+
TCONS_00001564	class_code"="	XLOC_000473	ZNF106	22	1	143786671	143852227	+
TCONS_00001565	class_code"="	XLOC_000473	ZNF106	22	1	143786676	143847965	+
TCONS_00001566	class_code"j"	XLOC_000473	ZNF106	21	1	143786676	143852227	+
TCONS_00001567	class_code"j"	XLOC_000473	ZNF106	7	1	143813641	143831452	+
TCONS_00001568	class_code"j"	XLOC_000473	ZNF106	19	1	143813641	143852227	+
TCONS_00001569	class_code"j"	XLOC_000473	ZNF106	19	1	143818355	143852227	+
TCONS_00001570	class_code"j"	XLOC_000474	TMEM87A	19	1	143975304	144034597	+
TCONS_00001571	class_code"j"	XLOC_000474	TMEM87A	19	1	143977430	144034597	+
TCONS_00001572	class_code"j"	XLOC_000474	TMEM87A	15	1	143990773	144024061	+
TCONS_00001573	class_code"="	XLOC_000474	TMEM87A	20	1	143990773	144034566	+
TCONS_00001574	class_code"j"	XLOC_000474	TMEM87A	20	1	143990773	144034597	+
TCONS_00001575	class_code"j"	XLOC_000474	TMEM87A	20	1	143990773	144034597	+
TCONS_00001576	class_code"j"	XLOC_000474	TMEM87A	20	1	143990773	144034597	+
TCONS_00001577	class_code"j"	XLOC_000474	TMEM87A	19	1	143992046	144034597	+
TCONS_00001578	class_code"j"	XLOC_000475	VPS39	11	1	144088765	144117833	+
TCONS_00001579	class_code"j"	XLOC_000475	VPS39	25	1	144088765	144141139	+
TCONS_00001580	class_code"j"	XLOC_000475	VPS39	26	1	144088765	144141139	+
TCONS_00001581	class_code"="	XLOC_000475	VPS39	23	1	144088765	144141139	+
TCONS_00001582	class_code"="	XLOC_000476	PLA2G4F	21	1	144142458	144154302	+
TCONS_00001583	class_code"="	XLOC_000477	PLA2G4D	26	1	144185253	144206985	+
TCONS_00001584	class_code"="	XLOC_000477	PLA2G4D	27	1	144185274	144206985	+
TCONS_00001585	class_code"="	XLOC_000478	ENSSSCG00000024566	5	1	144339768	144346612	+
TCONS_00001586	class_code"="	XLOC_000479	ENSSSCG00000004735	2	1	144360846	144382433	+
TCONS_00001587	class_code"="	XLOC_000480	ENSSSCG00000022540	2	1	144422794	144424568	+
TCONS_00001588	class_code"j"	XLOC_000481	ENSSSCG00000027182	20	1	144428724	144491649	+
TCONS_00001589	class_code"j"	XLOC_000481	ENSSSCG00000027182	20	1	144433060	144491649	+
TCONS_00001590	class_code"j"	XLOC_000481	ENSSSCG00000027182	20	1	144433302	144491649	+
TCONS_00001591	class_code"j"	XLOC_000481	ENSSSCG00000027182	19	1	144433304	144491649	+
TCONS_00001592	class_code"j"	XLOC_000481	ENSSSCG00000004739	9	1	144433311	144740959	+
TCONS_00001593	class_code"j"	XLOC_000481	ENSSSCG00000027182	15	1	144453464	144491649	+
TCONS_00001594	class_code"j"	XLOC_000481	ENSSSCG00000027182	14	1	144457942	144491649	+
TCONS_00001595	class_code"="	XLOC_000481	ENSSSCG00000027182	16	1	144458090	144489585	+
TCONS_00001596	class_code"="	XLOC_000481	ENSSSCG00000027182	16	1	144458090	144491649	+
TCONS_00001597	class_code"j"	XLOC_000481	ENSSSCG00000027182	5	1	144458556	144469610	+
TCONS_00001598	class_code"j"	XLOC_000482	ENSSSCG00000004738	10	1	144695823	144740959	+
TCONS_00001599	class_code"j"	XLOC_000482	ENSSSCG00000004738	9	1	144695840	144740781	+
TCONS_00001600	class_code"j"	XLOC_000482	ENSSSCG00000004738	9	1	144696118	144740959	+
TCONS_00001601	class_code"j"	XLOC_000482	ENSSSCG00000004738	30	1	144491724	144548307	+
TCONS_00001602	class_code"j"	XLOC_000482	ENSSSCG00000004738	31	1	144491724	144548307	+
TCONS_00001603	class_code"="	XLOC_000482	ENSSSCG00000004738	29	1	144491724	144548307	+
TCONS_00001604	class_code"="	XLOC_000482	ENSSSCG00000004738	32	1	144491724	144548307	+
TCONS_00001605	class_code"="	XLOC_000483	ENSSSCG00000004741	31	1	144491724	144548307	+
TCONS_00001606	class_code"="	XLOC_000484	ENSSSCG00000004737	31	1	144494609	144548307	+
TCONS_00001607	class_code"j"	XLOC_000484	ENSSSCG00000004737	30	1	144494609	144548307	+
TCONS_00001608	class_code"j"	XLOC_000481	ENSSSCG00000004739	8	1	144548482	144556400	+
TCONS_00001609	class_code"="	XLOC_000481	ENSSSCG00000004739	20	1	144557403	144566969	+
TCONS_00001610	class_code"j"	XLOC_000481	ENSSSCG00000004739	19	1	144558321	144566969	+
TCONS_00001611	class_code"="	XLOC_000485	ENSSSCG00000023579	3	1	144744290	144745621	+
TCONS_00001612	class_code"="	XLOC_000486	ENSSSCG00000004743	1	1	144812685	144812961	+
TCONS_00001613	class_code"u"	XLOC_000487		1	1	144826399	144829346	+
TCONS_00001614	class_code"u"	XLOC_000487		2	1	144826399	144831423	+
TCONS_00001615	class_code"u"	XLOC_000487		1	1	144829461	144831423	+
TCONS_00001616	class_code"j"	XLOC_000488	RPAP1	25	1	144910419	144928836	+
TCONS_00001617	class_code"j"	XLOC_000488	RPAP1	22	1	144910429	144926236	+
TCONS_00001618	class_code"j"	XLOC_000488	RPAP1	25	1	144910430	144928836	+
TCONS_00001619	class_code"j"	XLOC_000488	RPAP1	24	1	144910430	144928836	+
TCONS_00001620	class_code"="	XLOC_000488	RPAP1	24	1	144911312	144928836	+
TCONS_00001621	class_code"="	XLOC_000489	U6	1	1	144993206	144993309	+
TCONS_00001622	class_code"j"	XLOC_000490	ENSSSCG00000004750	2	1	145056292	145058802	+
TCONS_00001623	class_code"="	XLOC_000490	ENSSSCG00000004750	6	1	145057616	145066573	+
TCONS_00001624	class_code"="	XLOC_000491	ENSSSCG00000024401	1	1	145119723	145119894	+
TCONS_00001625	class_code"j"	XLOC_000492	NDUFAF1	3	1	145130677	145136980	+
TCONS_00001626	class_code"="	XLOC_000492	NDUFAF1	3	1	145130849	145136658	+
TCONS_00001627	class_code"="	XLOC_000493	ENSSSCG00000026091	1	1	145247883	145248054	+
TCONS_00001628	class_code"="	XLOC_000494	ENSSSCG00000004752	11	1	145262869	145313560	+
TCONS_00001629	class_code"="	XLOC_000494	ENSSSCG00000004752	11	1	145262869	145314381	+
TCONS_00001630	class_code"j"	XLOC_000495	INO80	35	1	145361733	145508638	+
TCONS_00001631	class_code"j"	XLOC_000495	INO80	37	1	145362319	145508638	+
TCONS_00001632	class_code"j"	XLOC_000495	INO80	12	1	145362381	145416733	+
TCONS_00001633	class_code"j"	XLOC_000495	INO80	35	1	145362381	145508638	+
TCONS_00001634	class_code"j"	XLOC_000495	INO80	35	1	145362381	145508638	+
TCONS_00001635	class_code"j"	XLOC_000495	INO80	36	1	145362381	145508638	+
TCONS_00001636	class_code"="	XLOC_000495	INO80	35	1	145392127	145508638	+
TCONS_00001637	class_code"="	XLOC_000495	INO80	35	1	145394742	145504961	+
TCONS_00001638	class_code"="	XLOC_000495	U6	1	1	145508421	145508560	+
TCONS_00001639	class_code"="	XLOC_000496	RHOV	3	1	145601505	145603655	+
TCONS_00001640	class_code"="	XLOC_000497	PPP1R14D	5	1	145643558	145829619	+
TCONS_00001641	class_code"j"	XLOC_000498	DNAJC17	9	1	145675014	145717684	+
TCONS_00001642	class_code"j"	XLOC_000498	DNAJC17	11	1	145675014	145717684	+
TCONS_00001643	class_code"j"	XLOC_000498	DNAJC17	10	1	145675039	145714202	+
TCONS_00001644	class_code"="	XLOC_000498	DNAJC17	11	1	145675039	145717529	+
TCONS_00001645	class_code"j"	XLOC_000499	RMDN3	13	1	145732736	145750480	+
TCONS_00001646	class_code"j"	XLOC_000499	RMDN3	12	1	145732741	145750480	+
TCONS_00001647	class_code"="	XLOC_000499	RMDN3	13	1	145732752	145749962	+
TCONS_00001648	class_code"j"	XLOC_000499	RMDN3	13	1	145732752	145750480	+
TCONS_00001649	class_code"o"	XLOC_000500	PPP1R14D	7	1	145824174	145833863	+
TCONS_00001650	class_code"="	XLOC_000501	U6	1	1	145914447	145914554	+
TCONS_00001651	class_code"j"	XLOC_000502	C15orf52	12	1	146059411	146070319	+
TCONS_00001652	class_code"j"	XLOC_000502	C15orf52	11	1	146059422	146070319	+
TCONS_00001653	class_code"j"	XLOC_000502	C15orf52	11	1	146059423	146070319	+
TCONS_00001654	class_code"j"	XLOC_000502	C15orf52	10	1	146059437	146070319	+
TCONS_00001655	class_code"j"	XLOC_000502	C15orf52	12	1	146059459	146070319	+
TCONS_00001656	class_code"j"	XLOC_000502	C15orf52	11	1	146059847	146070319	+
TCONS_00001657	class_code"="	XLOC_000502	C15orf52	12	1	146059860	146065854	+
TCONS_00001658	class_code"="	XLOC_000502	C15orf52	11	1	146059860	146065854	+
TCONS_00001659	class_code"="	XLOC_000502	C15orf52	11	1	146059860	146070319	+
TCONS_00001660	class_code"j"	XLOC_000502	C15orf52	11	1	146059860	146070319	+
TCONS_00001661	class_code"j"	XLOC_000502	C15orf52	11	1	146059860	146070319	+
TCONS_00001662	class_code"j"	XLOC_000502	C15orf52	12	1	146060026	146070319	+
TCONS_00001663	class_code"j"	XLOC_000502	C15orf52	10	1	146060118	146070319	+
TCONS_00001664	class_code"j"	XLOC_000502	C15orf52	10	1	146060123	146070319	+
TCONS_00001665	class_code"j"	XLOC_000502	C15orf52	9	1	146060130	146070319	+
TCONS_00001666	class_code"j"	XLOC_000502	C15orf52	9	1	146061338	146070319	+
TCONS_00001667	class_code"="	XLOC_000503	ENSSSCG00000004781	6	1	146145931	146149765	+
TCONS_00001668	class_code"="	XLOC_000504	ENSSSCG00000004784	3	1	146251861	146254473	+
TCONS_00001669	class_code"j"	XLOC_000504	ENSSSCG00000004784	2	1	146252441	146254514	+
TCONS_00001670	class_code"j"	XLOC_000504	ENSSSCG00000004784	2	1	146252463	146253758	+
TCONS_00001671	class_code"j"	XLOC_000505	ENSSSCG00000030580	5	1	146304697	146312776	+
TCONS_00001672	class_code"="	XLOC_000505	ENSSSCG00000030580	5	1	146304942	146312662	+
TCONS_00001673	class_code"="	XLOC_000506	ENSSSCG00000027242	2	1	146348109	146349664	+
TCONS_00001674	class_code"u"	XLOC_000507		4	1	146425597	146433264	+
TCONS_00001675	class_code"u"	XLOC_000507		5	1	146425597	146433264	+
TCONS_00001676	class_code"u"	XLOC_000507		4	1	146425814	146433264	+
TCONS_00001677	class_code"u"	XLOC_000507		3	1	146425814	146433264	+
TCONS_00001678	class_code"u"	XLOC_000507		2	1	146430863	146433264	+
TCONS_00001679	class_code"u"	XLOC_000507		1	1	146431895	146433266	+
TCONS_00001680	class_code"u"	XLOC_000508		6	1	146434983	146443946	+
TCONS_00001681	class_code"u"	XLOC_000508		1	1	146437200	146438682	+
TCONS_00001682	class_code"u"	XLOC_000509		2	1	146452248	146455139	+
TCONS_00001683	class_code"u"	XLOC_000510		1	1	146460154	146463769	+
TCONS_00001684	class_code"u"	XLOC_000510		3	1	146460154	146463769	+
TCONS_00001685	class_code"u"	XLOC_000510		2	1	146460169	146463769	+
TCONS_00001686	class_code"u"	XLOC_000510		2	1	146461242	146463769	+
TCONS_00001687	class_code"="	XLOC_000511	GPR176	3	1	146662318	146669801	+
TCONS_00001688	class_code"j"	XLOC_000511	GPR176	2	1	146667091	146671082	+
TCONS_00001689	class_code"o"	XLOC_000512	ENSSSCG00000030198	2	1	147287542	147295736	+
TCONS_00001690	class_code"="	XLOC_000512	ENSSSCG00000030198	2	1	147290626	147295736	+
TCONS_00001691	class_code"o"	XLOC_000512	ENSSSCG00000030198	1	1	147290626	147295736	+
TCONS_00001692	class_code"="	XLOC_000512	ENSSSCG00000030198	1	1	147292890	147294855	+
TCONS_00001693	class_code"u"	XLOC_000513		3	1	147463590	147498755	+
TCONS_00001694	class_code"u"	XLOC_000513		4	1	147463590	147566865	+
TCONS_00001695	class_code"u"	XLOC_000513		1	1	147564784	147568730	+
TCONS_00001696	class_code"j"	XLOC_000514	RASGRP1	10	1	148187550	148257330	+
TCONS_00001697	class_code"j"	XLOC_000514	RASGRP1	12	1	148187550	148257330	+
TCONS_00001698	class_code"j"	XLOC_000514	RASGRP1	14	1	148187550	148267658	+
TCONS_00001699	class_code"j"	XLOC_000514	RASGRP1	13	1	148187550	148267658	+
TCONS_00001700	class_code"j"	XLOC_000514	RASGRP1	3	1	148187586	148228243	+
TCONS_00001701	class_code"j"	XLOC_000514	RASGRP1	15	1	148187751	148257330	+
TCONS_00001702	class_code"="	XLOC_000514	RASGRP1	17	1	148187751	148270286	+
TCONS_00001703	class_code"j"	XLOC_000514	RASGRP1	9	1	148247337	148274979	+
TCONS_00001704	class_code"j"	XLOC_000514	RASGRP1	6	1	148247337	148274979	+
TCONS_00001705	class_code"j"	XLOC_000514	RASGRP1	6	1	148252996	148274979	+
TCONS_00001706	class_code"j"	XLOC_000514	RASGRP1	2	1	148257803	148274979	+
TCONS_00001707	class_code"="	XLOC_000515	U6	1	1	149405317	149405424	+
TCONS_00001708	class_code"u"	XLOC_000516		2	1	150035103	150125785	+
TCONS_00001709	class_code"u"	XLOC_000516		1	1	150124227	150125785	+
TCONS_00001710	class_code"="	XLOC_000517	ENSSSCG00000022814	1	1	151500861	151501008	+
TCONS_00001711	class_code"="	XLOC_000518	ENSSSCG00000029748	1	1	151649744	151649891	+
TCONS_00001712	class_code"u"	XLOC_000519		1	1	151838642	151839289	+
TCONS_00001713	class_code"u"	XLOC_000519		6	1	151838642	152095563	+
TCONS_00001714	class_code"u"	XLOC_000519		1	1	151841552	151842533	+
TCONS_00001715	class_code"u"	XLOC_000519		4	1	151841552	151879646	+
TCONS_00001716	class_code"u"	XLOC_000519		1	1	151979141	151980051	+
TCONS_00001717	class_code"u"	XLOC_000520		1	1	152022583	152024792	+
TCONS_00001718	class_code"u"	XLOC_000520		2	1	152023091	152095563	+
TCONS_00001719	class_code"u"	XLOC_000519		2	1	152011681	152018254	+
TCONS_00001720	class_code"u"	XLOC_000519		1	1	152017699	152020249	+
TCONS_00001721	class_code"x"	XLOC_000521	ZNF770	2	1	152191868	152196645	+
TCONS_00001722	class_code"="	XLOC_000522	ENSSSCG00000022186	8	1	152234189	152246870	+
TCONS_00001723	class_code"u"	XLOC_000523		1	1	152357540	152363253	+
TCONS_00001724	class_code"u"	XLOC_000523		2	1	152358080	152362687	+
TCONS_00001725	class_code"u"	XLOC_000523		2	1	152358080	152380892	+
TCONS_00001726	class_code"u"	XLOC_000523		1	1	152377781	152380892	+
TCONS_00001727	class_code"="	XLOC_000524	ACTC1	7	1	152412020	152420442	+
TCONS_00001728	class_code"="	XLOC_000524	ACTC1	7	1	152412333	152417610	+
TCONS_00001729	class_code"="	XLOC_000525	GJD2	2	1	152453075	152455031	+
TCONS_00001730	class_code"j"	XLOC_000526	ENSSSCG00000004806	2	1	152625145	152631241	+
TCONS_00001731	class_code"="	XLOC_000526	ENSSSCG00000004806	15	1	152625877	152647031	+
TCONS_00001732	class_code"j"	XLOC_000526	ENSSSCG00000004806	14	1	152630151	152647031	+
TCONS_00001733	class_code"="	XLOC_000527	SCG5	4	1	152695779	152712187	+
TCONS_00001734	class_code"o"	XLOC_000528	GREM1	2	1	152738011	152749474	+
TCONS_00001735	class_code"o"	XLOC_000528	GREM1	2	1	152742171	152749474	+
TCONS_00001736	class_code"="	XLOC_000528	GREM1	1	1	152745850	152746405	+
TCONS_00001737	class_code"u"	XLOC_000529		3	1	153439058	153451087	+
TCONS_00001738	class_code"j"	XLOC_000529	PGPEP1L	5	1	153439059	153511304	+
TCONS_00001739	class_code"u"	XLOC_000529		1	1	153447087	153451087	+
TCONS_00001740	class_code"j"	XLOC_000529	PGPEP1L	3	1	153476342	153511304	+
TCONS_00001741	class_code"j"	XLOC_000529	PGPEP1L	2	1	153476342	153511304	+
TCONS_00001742	class_code"="	XLOC_000529	PGPEP1L	4	1	153478772	153511304	+
TCONS_00001743	class_code"="	XLOC_000530	U6	1	1	153871561	153871666	+
TCONS_00001744	class_code"="	XLOC_000531	SYNM	4	1	154019850	154044632	+
TCONS_00001745	class_code"j"	XLOC_000531	SYNM	7	1	154019850	154063997	+
TCONS_00001746	class_code"j"	XLOC_000531	SYNM	6	1	154019850	154063997	+
TCONS_00001747	class_code"j"	XLOC_000531	SYNM	5	1	154019850	154063997	+
TCONS_00001748	class_code"j"	XLOC_000531	SYNM	6	1	154019850	154063997	+
TCONS_00001749	class_code"j"	XLOC_000531	SYNM	7	1	154019850	154063997	+
TCONS_00001750	class_code"j"	XLOC_000531	SYNM	7	1	154019850	154063997	+
TCONS_00001751	class_code"j"	XLOC_000531	SYNM	6	1	154019850	154122778	+
TCONS_00001752	class_code"x"	XLOC_000531	TTC23	1	1	154118679	154123427	+
TCONS_00001753	class_code"j"	XLOC_000532	ENSSSCG00000004814	10	1	154171019	154373178	+
TCONS_00001754	class_code"j"	XLOC_000532	ENSSSCG00000004814	9	1	154171019	154373178	+
TCONS_00001755	class_code"j"	XLOC_000532	ENSSSCG00000004814	9	1	154171038	154373178	+
TCONS_00001756	class_code"j"	XLOC_000532	ENSSSCG00000004814	10	1	154171073	154373178	+
TCONS_00001757	class_code"j"	XLOC_000532	ENSSSCG00000004814	8	1	154220743	154373178	+
TCONS_00001758	class_code"="	XLOC_000532	ENSSSCG00000004814	6	1	154223678	154362246	+
TCONS_00001759	class_code"j"	XLOC_000532	ENSSSCG00000004814	2	1	154359975	154373178	+
TCONS_00001760	class_code"u"	XLOC_000533		2	1	154431490	154433181	+
TCONS_00001761	class_code"j"	XLOC_000534	ENSSSCG00000028771	8	1	154631306	154695319	+
TCONS_00001762	class_code"j"	XLOC_000534	ENSSSCG00000028771	8	1	154631306	154695319	+
TCONS_00001763	class_code"j"	XLOC_000534	ENSSSCG00000028771	8	1	154631306	154695319	+
TCONS_00001764	class_code"j"	XLOC_000534	ENSSSCG00000028771	7	1	154642177	154695319	+
TCONS_00001765	class_code"j"	XLOC_000534	ENSSSCG00000028771	7	1	154642179	154695319	+
TCONS_00001766	class_code"j"	XLOC_000534	ENSSSCG00000028771	8	1	154642179	154695319	+
TCONS_00001767	class_code"="	XLOC_000534	ENSSSCG00000028771	9	1	154648092	154692276	+
TCONS_00001768	class_code"="	XLOC_000534	ENSSSCG00000028771	9	1	154648092	154692276	+
TCONS_00001769	class_code"j"	XLOC_000534	ENSSSCG00000028771	9	1	154648092	154695319	+
TCONS_00001770	class_code"j"	XLOC_000534	ENSSSCG00000028771	9	1	154648092	154695319	+
TCONS_00001771	class_code"j"	XLOC_000534	ENSSSCG00000028771	8	1	154648092	154695319	+
TCONS_00001772	class_code"j"	XLOC_000534	ENSSSCG00000028771	8	1	154648092	154695319	+
TCONS_00001773	class_code"j"	XLOC_000534	ENSSSCG00000028771	7	1	154648110	154695319	+
TCONS_00001774	class_code"j"	XLOC_000535	LYSMD4	2	1	154771009	154777360	+
TCONS_00001775	class_code"j"	XLOC_000535	LYSMD4	3	1	154771009	154777360	+
TCONS_00001776	class_code"j"	XLOC_000535	LYSMD4	2	1	154771009	154777360	+
TCONS_00001777	class_code"="	XLOC_000535	LYSMD4	3	1	154771009	154777360	+
TCONS_00001778	class_code"j"	XLOC_000535	LYSMD4	3	1	154771095	154777360	+
TCONS_00001779	class_code"="	XLOC_000536	ENSSSCG00000026215	2	1	155040577	155041568	+
TCONS_00001780	class_code"j"	XLOC_000536	ENSSSCG00000026215	3	1	155040580	155118080	+
TCONS_00001781	class_code"u"	XLOC_000537		3	1	155395881	155404120	+
TCONS_00001782	class_code"u"	XLOC_000537		3	1	155395881	155404120	+
TCONS_00001783	class_code"j"	XLOC_000537	ASB7	7	1	155395881	155445666	+
TCONS_00001784	class_code"="	XLOC_000537	ASB7	3	1	155404964	155445666	+
TCONS_00001785	class_code"="	XLOC_000537	ASB7	3	1	155405690	155444614	+
TCONS_00001786	class_code"j"	XLOC_000538	ENSSSCG00000004823	32	1	155637254	155853979	+
TCONS_00001787	class_code"="	XLOC_000538	ENSSSCG00000004823	32	1	155637549	155853766	+
TCONS_00001788	class_code"j"	XLOC_000538	ENSSSCG00000004823	31	1	155637549	155853979	+
TCONS_00001789	class_code"="	XLOC_000539	ENSSSCG00000026298	29	1	155786292	155853979	+
TCONS_00001790	class_code"j"	XLOC_000539	ENSSSCG00000026298	20	1	155814446	155853979	+
TCONS_00001791	class_code"j"	XLOC_000539	ENSSSCG00000026298	4	1	155679742	155693815	+
TCONS_00001792	class_code"="	XLOC_000540	ENSSSCG00000018227	5	1	155679742	155694179	+
TCONS_00001793	class_code"j"	XLOC_000538	ENSSSCG00000004823	7	1	155679742	155696285	+
TCONS_00001794	class_code"j"	XLOC_000538	ENSSSCG00000004823	1	1	155743425	155743571	+
TCONS_00001795	class_code"="	XLOC_000541	U6	1	1	156407822	156407929	+
TCONS_00001796	class_code"="	XLOC_000542	ENSSSCG00000027079	3	1	157187228	157208877	+
TCONS_00001797	class_code"j"	XLOC_000543	ATP10A	14	1	157467604	157505910	+
TCONS_00001798	class_code"j"	XLOC_000543	ATP10A	15	1	157467604	157508135	+
TCONS_00001799	class_code"j"	XLOC_000543	ATP10A	20	1	157470768	157522115	+
TCONS_00001800	class_code"j"	XLOC_000543	ATP10A	21	1	157470775	157522115	+
TCONS_00001801	class_code"j"	XLOC_000543	ATP10A	20	1	157470775	157522115	+
TCONS_00001802	class_code"j"	XLOC_000543	ATP10A	20	1	157470910	157522115	+
TCONS_00001803	class_code"j"	XLOC_000543	ATP10A	19	1	157470910	157522115	+
TCONS_00001804	class_code"="	XLOC_000543	ATP10A	17	1	157470910	157522115	+
TCONS_00001805	class_code"j"	XLOC_000543	ATP10A	16	1	157478991	157522115	+
TCONS_00001806	class_code"j"	XLOC_000543	ATP10A	17	1	157481169	157522115	+
TCONS_00001807	class_code"j"	XLOC_000543	ATP10A	6	1	157507652	157522115	+
TCONS_00001808	class_code"="	XLOC_000544	UBE3A	13	1	157782111	157887563	+
TCONS_00001809	class_code"j"	XLOC_000544	UBE3A	12	1	157782304	157887563	+
TCONS_00001810	class_code"j"	XLOC_000544	UBE3A	14	1	157783403	157887563	+
TCONS_00001811	class_code"j"	XLOC_000544	UBE3A	11	1	157783403	157887563	+
TCONS_00001812	class_code"j"	XLOC_000544	UBE3A	16	1	157783424	157887563	+
TCONS_00001813	class_code"j"	XLOC_000544	UBE3A	14	1	157783424	157887563	+
TCONS_00001814	class_code"j"	XLOC_000544	UBE3A	14	1	157783442	157887563	+
TCONS_00001815	class_code"j"	XLOC_000544	UBE3A	14	1	157783453	157887563	+
TCONS_00001816	class_code"j"	XLOC_000544	UBE3A	11	1	157783461	157887563	+
TCONS_00001817	class_code"="	XLOC_000544	UBE3A	13	1	157783502	157881006	+
TCONS_00001818	class_code"j"	XLOC_000544	UBE3A	8	1	157783502	157887563	+
TCONS_00001819	class_code"j"	XLOC_000544	UBE3A	11	1	157821066	157887563	+
TCONS_00001820	class_code"j"	XLOC_000544	UBE3A	11	1	157821323	157887563	+
TCONS_00001821	class_code"j"	XLOC_000544	UBE3A	12	1	157821335	157887563	+
TCONS_00001822	class_code"o"	XLOC_000545	SNORD116	2	1	158005879	158009682	+
TCONS_00001823	class_code"="	XLOC_000546	SNORD116	1	1	158009612	158009704	+
TCONS_00001824	class_code"="	XLOC_000545	SNORD116	1	1	158006978	158007070	+
TCONS_00001825	class_code"="	XLOC_000547	ENSSSCG00000004834	1	1	158275358	158276999	+
TCONS_00001826	class_code"="	XLOC_000548	ENSSSCG00000004835	1	1	158314802	158317091	+
TCONS_00001827	class_code"="	XLOC_000549	U6	1	1	159164011	159164114	+
TCONS_00001828	class_code"="	XLOC_000550	OTUD7A	11	1	159292513	159363442	+
TCONS_00001829	class_code"="	XLOC_000550	OTUD7A	11	1	159292513	159365058	+
TCONS_00001830	class_code"j"	XLOC_000550	OTUD7A	3	1	159359084	159365058	+
TCONS_00001831	class_code"j"	XLOC_000550	OTUD7A	2	1	159360416	159365058	+
TCONS_00001832	class_code"="	XLOC_000551	TRPM1	27	1	159710048	159801269	+
TCONS_00001833	class_code"="	XLOC_000552	ENSSSCG00000019509	1	1	159731989	159732099	+
TCONS_00001834	class_code"="	XLOC_000553	MTMR10	16	1	159812338	159864819	+
TCONS_00001835	class_code"j"	XLOC_000553	MTMR10	5	1	159812538	159836708	+
TCONS_00001836	class_code"="	XLOC_000553	MTMR10	16	1	159812538	159863503	+
TCONS_00001837	class_code"j"	XLOC_000553	MTMR10	15	1	159812538	159864819	+
TCONS_00001838	class_code"j"	XLOC_000553	MTMR10	15	1	159812538	159864819	+
TCONS_00001839	class_code"j"	XLOC_000553	MTMR10	18	1	159812538	159864819	+
TCONS_00001840	class_code"j"	XLOC_000553	MTMR10	16	1	159812538	159864819	+
TCONS_00001841	class_code"="	XLOC_000554	ENSSSCG00000025779	2	1	159835921	159842544	+
TCONS_00001842	class_code"j"	XLOC_000553	MTMR10	11	1	159838326	159864819	+
TCONS_00001843	class_code"j"	XLOC_000553	MTMR10	7	1	159846071	159864819	+
TCONS_00001844	class_code"j"	XLOC_000553	MTMR10	1	1	159826820	159826901	+
TCONS_00001845	class_code"="	XLOC_000555	MCEE	3	1	159938591	159968311	+
TCONS_00001846	class_code"="	XLOC_000556	ENSSSCG00000004849	19	1	160095588	160397024	+
TCONS_00001847	class_code"="	XLOC_000557	ENSSSCG00000004851	5	1	160169104	160182696	+
TCONS_00001848	class_code"="	XLOC_000558	ENSSSCG00000004850	4	1	160375479	160458854	+
TCONS_00001849	class_code"j"	XLOC_000559	ENSSSCG00000004854	12	1	161035149	161068710	+
TCONS_00001850	class_code"="	XLOC_000559	ENSSSCG00000004854	12	1	161036140	161068710	+
TCONS_00001851	class_code"j"	XLOC_000559	ENSSSCG00000004854	11	1	161036179	161068710	+
TCONS_00001852	class_code"j"	XLOC_000559	ENSSSCG00000004854	12	1	161036193	161068710	+
TCONS_00001853	class_code"="	XLOC_000559	ENSSSCG00000004854	12	1	161036718	161062878	+
TCONS_00001854	class_code"j"	XLOC_000559	ENSSSCG00000004854	9	1	161042255	161068710	+
TCONS_00001855	class_code"j"	XLOC_000559	ENSSSCG00000004854	9	1	161042257	161068710	+
TCONS_00001856	class_code"j"	XLOC_000559	ENSSSCG00000004854	9	1	161042257	161068710	+
TCONS_00001857	class_code"j"	XLOC_000559	ENSSSCG00000004854	9	1	161042270	161068710	+
TCONS_00001858	class_code"j"	XLOC_000559	ENSSSCG00000004854	9	1	161042313	161068710	+
TCONS_00001859	class_code"x"	XLOC_000560	ENSSSCG00000004856	2	1	161434428	161661413	+
TCONS_00001860	class_code"x"	XLOC_000561	ENSSSCG00000004856	1	1	161660016	161661413	+
TCONS_00001861	class_code"x"	XLOC_000560	ENSSSCG00000004857	2	1	161439290	161653985	+
TCONS_00001862	class_code"="	XLOC_000562	SALL3	3	1	161848005	161853942	+
TCONS_00001863	class_code"u"	XLOC_000563		2	1	163127998	163155508	+
TCONS_00001864	class_code"o"	XLOC_000564	ZNF516	2	1	163849396	163901312	+
TCONS_00001865	class_code"j"	XLOC_000564	ZNF516	13	1	163849396	163956187	+
TCONS_00001866	class_code"j"	XLOC_000564	ZNF516	8	1	163849502	163956187	+
TCONS_00001867	class_code"j"	XLOC_000564	ZNF516	5	1	163849535	163956187	+
TCONS_00001868	class_code"j"	XLOC_000564	ZNF516	4	1	163849535	163956187	+
TCONS_00001869	class_code"j"	XLOC_000564	ZNF516	11	1	163898143	163956187	+
TCONS_00001870	class_code"="	XLOC_000564	ZNF516	12	1	163898658	163953127	+
TCONS_00001871	class_code"="	XLOC_000565	ENSSSCG00000019804	12	1	163933343	163956187	+
TCONS_00001872	class_code"j"	XLOC_000564	ZNF516	11	1	163944005	163956187	+
TCONS_00001873	class_code"j"	XLOC_000564	ZNF516	1	1	163914319	163914441	+
TCONS_00001874	class_code"o"	XLOC_000566	ENSSSCG00000004862	3	1	164776888	164786368	+
TCONS_00001875	class_code"o"	XLOC_000566	ENSSSCG00000004862	2	1	164776888	164786368	+
TCONS_00001876	class_code"o"	XLOC_000566	ENSSSCG00000004862	2	1	164776954	164786368	+
TCONS_00001877	class_code"u"	XLOC_000566		1	1	164776978	164782870	+
TCONS_00001878	class_code"o"	XLOC_000566	ENSSSCG00000004862	2	1	164776978	164786368	+
TCONS_00001879	class_code"="	XLOC_000566	ENSSSCG00000004862	1	1	164783050	164783988	+
TCONS_00001880	class_code"="	XLOC_000567	TSHZ1	2	1	164831141	164839673	+
TCONS_00001881	class_code"="	XLOC_000567	TSHZ1	2	1	164832381	164835889	+
TCONS_00001882	class_code"u"	XLOC_000568		1	1	164847744	164860667	+
TCONS_00001883	class_code"u"	XLOC_000568		2	1	164856712	164860667	+
TCONS_00001884	class_code"o"	XLOC_000569	ENSSSCG00000018662	4	1	165268833	165356719	+
TCONS_00001885	class_code"="	XLOC_000570	ENSSSCG00000018662	1	1	165272215	165272297	+
TCONS_00001886	class_code"="	XLOC_000571	ENSSSCG00000004870	12	1	165529516	165548510	+
TCONS_00001887	class_code"j"	XLOC_000571	ENSSSCG00000004870	12	1	165529558	165548510	+
TCONS_00001888	class_code"j"	XLOC_000571	ENSSSCG00000004870	12	1	165529560	165548510	+
TCONS_00001889	class_code"="	XLOC_000572	CNDP1	12	1	165565457	165588573	+
TCONS_00001890	class_code"="	XLOC_000573	CYB5A	5	1	165902017	165937614	+
TCONS_00001891	class_code"j"	XLOC_000574	FBXO15	5	1	166048808	166231889	+
TCONS_00001892	class_code"="	XLOC_000574	FBXO15	9	1	166049186	166087358	+
TCONS_00001893	class_code"="	XLOC_000575	ENSSSCG00000025660	3	1	166742076	166753228	+
TCONS_00001894	class_code"="	XLOC_000576	ENSSSCG00000018892	1	1	167096993	167097095	+
TCONS_00001895	class_code"="	XLOC_000577	CBLN2	5	1	167190972	167199122	+
TCONS_00001896	class_code"j"	XLOC_000578	ENSSSCG00000023069	20	1	169084538	169133799	+
TCONS_00001897	class_code"j"	XLOC_000578	ENSSSCG00000023069	27	1	169084538	169147358	+
TCONS_00001898	class_code"j"	XLOC_000578	ENSSSCG00000023069	12	1	169084749	169116426	+
TCONS_00001899	class_code"="	XLOC_000578	ENSSSCG00000023069	2	1	169087943	169090208	+
TCONS_00001900	class_code"j"	XLOC_000578	ENSSSCG00000023069	16	1	169087975	169130238	+
TCONS_00001901	class_code"j"	XLOC_000578	ENSSSCG00000023069	24	1	169087975	169147358	+
TCONS_00001902	class_code"j"	XLOC_000579	ENSSSCG00000026815	4	1	169149778	169159456	+
TCONS_00001903	class_code"="	XLOC_000579	ENSSSCG00000026815	5	1	169149957	169166152	+
TCONS_00001904	class_code"u"	XLOC_000580		2	1	169258936	169267598	+
TCONS_00001905	class_code"j"	XLOC_000581	ENSSSCG00000004880	4	1	169326907	169357549	+
TCONS_00001906	class_code"="	XLOC_000581	ENSSSCG00000004880	3	1	169326949	169335646	+
TCONS_00001907	class_code"="	XLOC_000582	TMX3	16	1	170746447	170789634	+
TCONS_00001908	class_code"j"	XLOC_000582	TMX3	15	1	170746447	170789884	+
TCONS_00001909	class_code"j"	XLOC_000582	TMX3	17	1	170746447	170789884	+
TCONS_00001910	class_code"="	XLOC_000583	5S_rRNA	1	1	171435523	171435646	+
TCONS_00001911	class_code"j"	XLOC_000584	CDH19	6	1	172916639	172955062	+
TCONS_00001912	class_code"j"	XLOC_000584	CDH19	12	1	172916639	173005305	+
TCONS_00001913	class_code"j"	XLOC_000584	CDH19	12	1	172916639	173005305	+
TCONS_00001914	class_code"j"	XLOC_000584	CDH19	15	1	172916639	173005305	+
TCONS_00001915	class_code"j"	XLOC_000584	CDH19	11	1	172916644	173005305	+
TCONS_00001916	class_code"="	XLOC_000584	CDH19	14	1	172944635	173004780	+
TCONS_00001917	class_code"j"	XLOC_000584	CDH19	11	1	172944635	173005305	+
TCONS_00001918	class_code"="	XLOC_000585	CDH7	10	1	173582717	173664142	+
TCONS_00001919	class_code"="	XLOC_000586	ENSSSCG00000004887	1	1	173767251	173767479	+
TCONS_00001920	class_code"u"	XLOC_000587		3	1	174178930	174190614	+
TCONS_00001921	class_code"="	XLOC_000588	ENSSSCG00000022337	7	1	175358372	175369461	+
TCONS_00001922	class_code"="	XLOC_000589	ENSSSCG00000021694	2	1	175370188	175373441	+
TCONS_00001923	class_code"="	XLOC_000590	SERPINB7	7	1	175390357	175435319	+
TCONS_00001924	class_code"="	XLOC_000591	SERPINB2	8	1	175502732	175517283	+
TCONS_00001925	class_code"="	XLOC_000592	ENSSSCG00000025727	1	1	175697438	175697527	+
TCONS_00001926	class_code"u"	XLOC_000593		2	1	175753886	175760427	+
TCONS_00001927	class_code"u"	XLOC_000593		1	1	175755560	175760427	+
TCONS_00001928	class_code"="	XLOC_000594	KDSR	10	1	175775173	175816627	+
TCONS_00001929	class_code"="	XLOC_000594	KDSR	10	1	175775173	175823531	+
TCONS_00001930	class_code"u"	XLOC_000595		2	1	175826046	175995789	+
TCONS_00001931	class_code"="	XLOC_000596	U6	1	1	176003202	176003296	+
TCONS_00001932	class_code"j"	XLOC_000597	ZCCHC2	13	1	176372638	176419611	+
TCONS_00001933	class_code"j"	XLOC_000597	ZCCHC2	13	1	176372638	176419611	+
TCONS_00001934	class_code"j"	XLOC_000597	ZCCHC2	11	1	176373653	176419611	+
TCONS_00001935	class_code"="	XLOC_000597	ZCCHC2	12	1	176373662	176419611	+
TCONS_00001936	class_code"="	XLOC_000597	ZCCHC2	12	1	176374031	176410884	+
TCONS_00001937	class_code"j"	XLOC_000597	ZCCHC2	13	1	176374031	176419611	+
TCONS_00001938	class_code"j"	XLOC_000597	ZCCHC2	13	1	176374031	176419611	+
TCONS_00001939	class_code"j"	XLOC_000597	ZCCHC2	12	1	176374031	176419611	+
TCONS_00001940	class_code"="	XLOC_000598	ENSSSCG00000021838	1	1	176514706	176515939	+
TCONS_00001941	class_code"="	XLOC_000598	ENSSSCG00000021838	1	1	176515235	176515326	+
TCONS_00001942	class_code"j"	XLOC_000599	PIGN	28	1	176781364	176881054	+
TCONS_00001943	class_code"j"	XLOC_000599	PIGN	30	1	176781364	176881054	+
TCONS_00001944	class_code"="	XLOC_000599	PIGN	30	1	176781372	176881054	+
TCONS_00001945	class_code"="	XLOC_000599	PIGN	30	1	176781391	176878848	+
TCONS_00001946	class_code"j"	XLOC_000599	PIGN	21	1	176811307	176881054	+
TCONS_00001947	class_code"="	XLOC_000600	7SK	1	1	177629349	177629655	+
TCONS_00001948	class_code"="	XLOC_000601	CCBE1	11	1	178904869	179134589	+
TCONS_00001949	class_code"j"	XLOC_000601	CCBE1	10	1	178905033	179128824	+
TCONS_00001950	class_code"="	XLOC_000601	CCBE1	11	1	178905033	179129728	+
TCONS_00001951	class_code"j"	XLOC_000602	LMAN1	13	1	179184819	179210935	+
TCONS_00001952	class_code"j"	XLOC_000602	LMAN1	14	1	179184819	179210935	+
TCONS_00001953	class_code"="	XLOC_000602	LMAN1	15	1	179184819	179210935	+
TCONS_00001954	class_code"j"	XLOC_000602	LMAN1	14	1	179184819	179210935	+
TCONS_00001955	class_code"="	XLOC_000602	LMAN1	13	1	179185030	179206074	+
TCONS_00001956	class_code"="	XLOC_000603	CPLX4	3	1	179212835	179239634	+
TCONS_00001957	class_code"="	XLOC_000604	RAX	3	1	179257055	179260967	+
TCONS_00001958	class_code"j"	XLOC_000605	ENSSSCG00000004911	7	1	179302518	179330504	+
TCONS_00001959	class_code"j"	XLOC_000605	ENSSSCG00000004911	9	1	179302518	179340824	+
TCONS_00001960	class_code"="	XLOC_000605	ENSSSCG00000004911	14	1	179302518	179360782	+
TCONS_00001961	class_code"="	XLOC_000606	SEC11C	6	1	179382896	179397677	+
TCONS_00001962	class_code"="	XLOC_000607	ENSSSCG00000004913	1	1	179430840	179430921	+
TCONS_00001963	class_code"u"	XLOC_000608		1	1	179469840	179472751	+
TCONS_00001964	class_code"u"	XLOC_000608		2	1	179469840	179477935	+
TCONS_00001965	class_code"u"	XLOC_000608		1	1	179475852	179477935	+
TCONS_00001966	class_code"="	XLOC_000609	MALT1	18	1	179658937	179701160	+
TCONS_00001967	class_code"j"	XLOC_000609	MALT1	16	1	179659460	179706376	+
TCONS_00001968	class_code"j"	XLOC_000609	MALT1	15	1	179660329	179706376	+
TCONS_00001969	class_code"j"	XLOC_000609	MALT1	7	1	179660455	179679610	+
TCONS_00001970	class_code"j"	XLOC_000609	MALT1	7	1	179660457	179679610	+
TCONS_00001971	class_code"="	XLOC_000609	MALT1	4	1	179660459	179668048	+
TCONS_00001972	class_code"="	XLOC_000609	MALT1	14	1	179660459	179701310	+
TCONS_00001973	class_code"j"	XLOC_000609	MALT1	9	1	179677122	179706376	+
TCONS_00001974	class_code"="	XLOC_000609	MALT1	2	1	179681614	179690897	+
TCONS_00001975	class_code"j"	XLOC_000610	ALPK2	13	1	179761765	179896431	+
TCONS_00001976	class_code"j"	XLOC_000610	ALPK2	5	1	179761768	179853781	+
TCONS_00001977	class_code"="	XLOC_000610	ALPK2	12	1	179772066	179891302	+
TCONS_00001978	class_code"j"	XLOC_000610	ALPK2	10	1	179802210	179896431	+
TCONS_00001979	class_code"j"	XLOC_000610	ALPK2	10	1	179802210	179896431	+
TCONS_00001980	class_code"j"	XLOC_000610	ALPK2	2	1	179807154	179853781	+
TCONS_00001981	class_code"u"	XLOC_000611		1	1	179948133	179949779	+
TCONS_00001982	class_code"x"	XLOC_000612	NEDD4L	1	1	179955385	179961171	+
TCONS_00001983	class_code"x"	XLOC_000613	NEDD4L	1	1	179961298	179975057	+
TCONS_00001984	class_code"x"	XLOC_000614	NEDD4L	1	1	179981576	179983024	+
TCONS_00001985	class_code"="	XLOC_000615	7SK	1	1	179990546	180000321	+
TCONS_00001986	class_code"="	XLOC_000615	7SK	1	1	179991400	179991734	+
TCONS_00001987	class_code"="	XLOC_000616	ENSSSCG00000004920	2	1	180184309	180188224	+
TCONS_00001988	class_code"="	XLOC_000616	ENSSSCG00000004920	2	1	180185936	180187416	+
TCONS_00001989	class_code"u"	XLOC_000617		1	1	180550926	180554864	+
TCONS_00001990	class_code"u"	XLOC_000617		2	1	180550926	180616286	+
TCONS_00001991	class_code"="	XLOC_000618	U5	1	1	180900947	180901063	+
TCONS_00001992	class_code"="	XLOC_000619	U5	1	1	180909302	180909419	+
TCONS_00001993	class_code"j"	XLOC_000620	HACD3	9	1	181100249	181132771	+
TCONS_00001994	class_code"="	XLOC_000620	HACD3	13	1	181100249	181141948	+
TCONS_00001995	class_code"="	XLOC_000620	HACD3	13	1	181100249	181141948	+
TCONS_00001996	class_code"j"	XLOC_000620	HACD3	11	1	181100249	181142795	+
TCONS_00001997	class_code"="	XLOC_000621	U6atac	9	1	181118111	181142795	+
TCONS_00001998	class_code"j"	XLOC_000620	HACD3	7	1	181121176	181142795	+
[truncated: 136,287 more rows]
