# Supplementary material for: Identification of CircRNA-Associated ceRNA Networks Using Longissimus Thoracis of Pigs of Different Breeds and Growth Stages
Source: Research Square preprint supplement (doi:10.21203/rs.3.rs-852221/v1), 2021-11-30
Supplement: Supplementary file [file 6d1f2077368fa8feabea202d.pdf]

**A**

**Marker** **PFKM** **ANKRD2** **MSTN** **MYOD1** **SRF** **IGF1** **MYBPC2** **LIMCH1** **PFKFB1** **MEF2D**

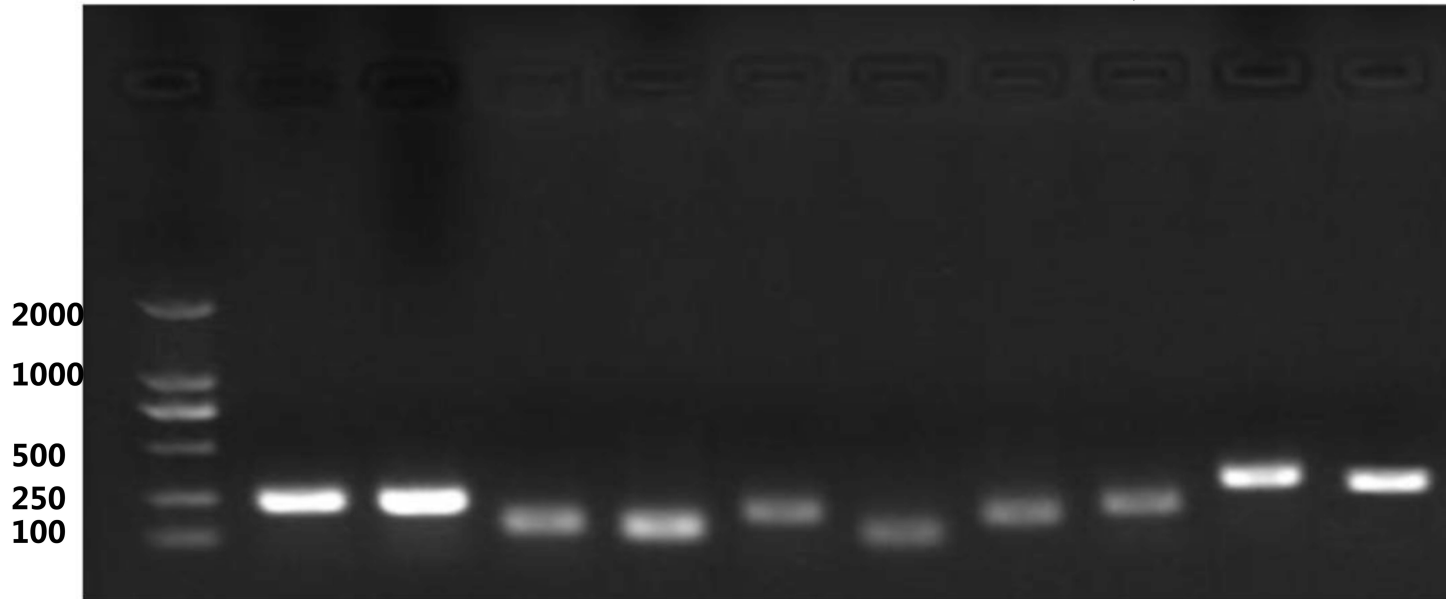

B

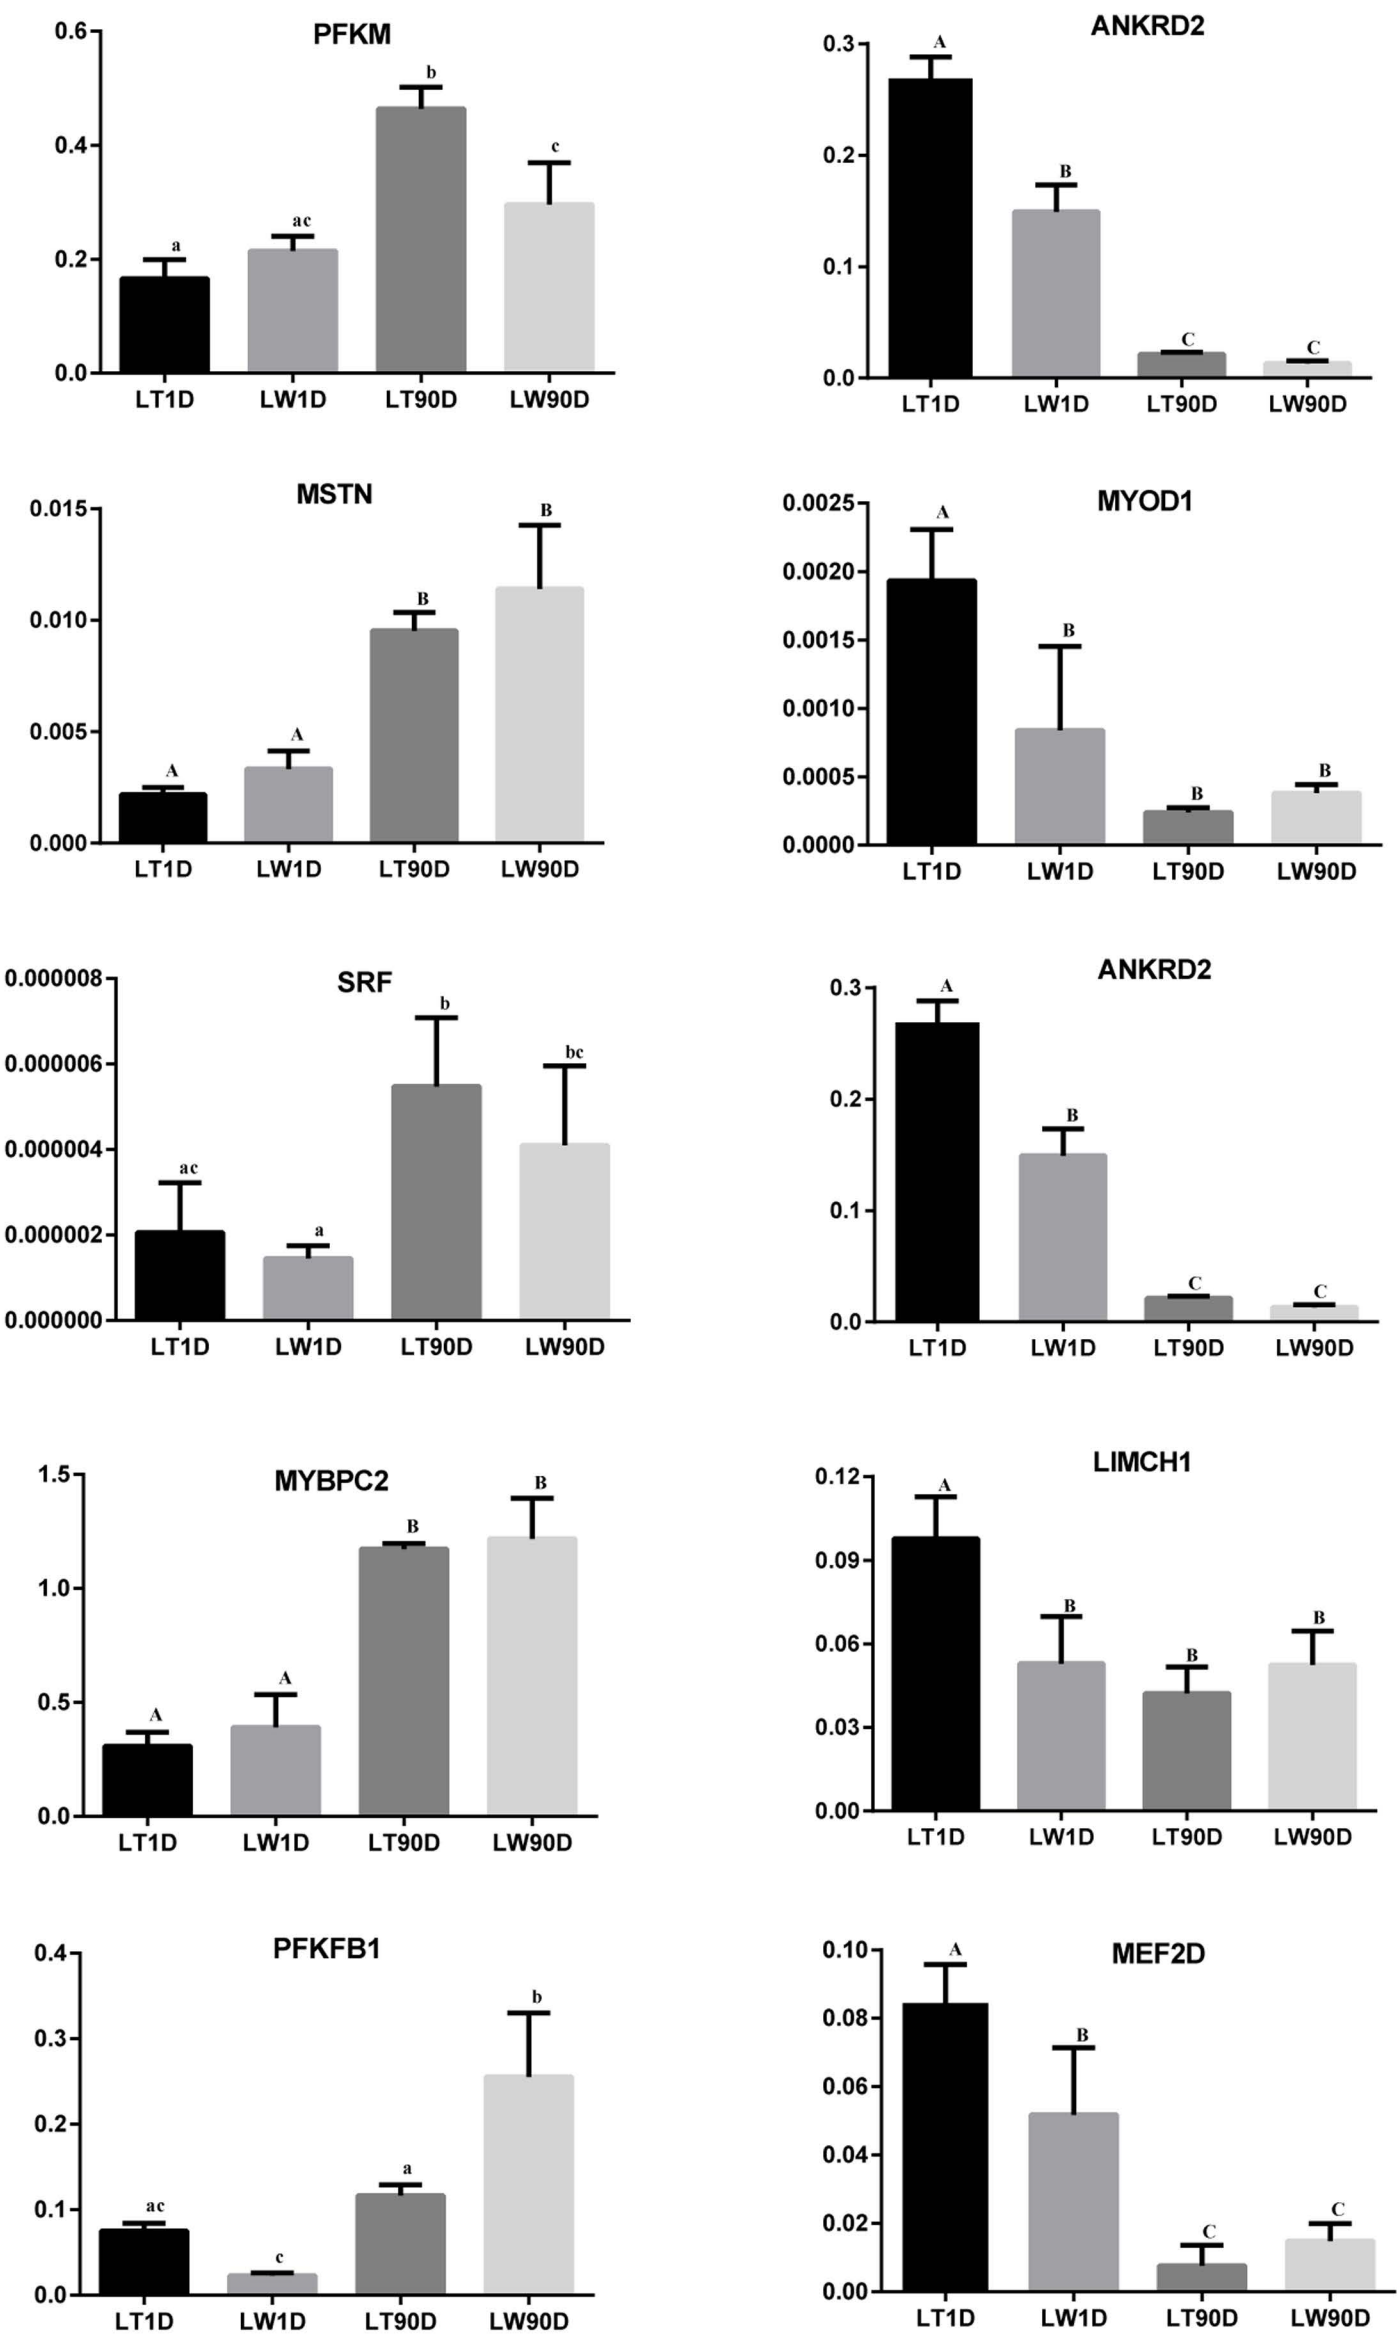

## **The expression of 10 coding genes involved in myogenesis using RT-PCR (A) and qPCR (B)**

Note: vertical coordinate represented for the relative expression level, and the data represented the mean  $\pm$  SD from 3 biological replicates with each measurement repeated 3 times. a-c denote values that differ significantly at  $P < 0.05$ , and A-C denote values that differ significantly at  $P < 0.01$ .
